# Supplementary material for: Diselenide-enabled photocatalytic hydroazolation of gem -difluoroalkenes
Source: Royal Society of Chemistry journal article supplement (doi:10.1039/d5sc04074d), 2025-01-01
Supplement: d5sc04074d1.pdf [file d5sc04074d1.pdf]

## Supporting Information

### Diselenide-Enabled Photocatalytic Hydroazolation of *gem*-Difluoroalkenes

Mohammed K. Abd El-Gaber,<sup>†a,b,c</sup> Ryan M. Herrick,<sup>†a</sup> Pranaya Sudhakar,<sup>d</sup> Ashutosh Rana,<sup>e</sup> Brent A. Roach,<sup>e</sup> Jeffrey E. Dick,<sup>e,f</sup> and Ryan A. Altman<sup>\*a,e</sup>

<sup>a</sup> Borch Department of Medicinal Chemistry and Molecular Pharmacology, Purdue University, West Lafayette, Indiana 47907, United States

<sup>b</sup> Medicinal Chemistry Department, Faculty of Pharmacy, Assiut University, Assiut 71526, Egypt

<sup>c</sup> Department of Pharmaceutical Sciences, University of Tennessee Health Science Center, Memphis, TN 38163, USA

<sup>d</sup> Department of Biology, Purdue University, West Lafayette, Indiana 47907, United States

<sup>e</sup> James Tarpo Jr. and Margaret Tarpo Department of Chemistry, Purdue University, West Lafayette, Indiana 47907, United States

<sup>f</sup> Elmore Family School of Electrical and Computer Engineering, Purdue University, West Lafayette, Indiana 47907, United States

<sup>†</sup> These authors contributed equally to this work.

<sup>\*</sup>Corresponding author's email address: [raaltman@purdue.edu](mailto:raaltman@purdue.edu)

## Table of Contents

|                                                                                            |         |
|--------------------------------------------------------------------------------------------|---------|
| 1. General Synthetic Information .....                                                     | S1–2    |
| 2. Reaction Development .....                                                              | S3–7    |
| 3. Synthesis and Characterization .....                                                    | S8–29   |
| 4. Gram Scale Reaction .....                                                               | S29–30  |
| 5. Mechanistic Studies .....                                                               | S31–54  |
| a. Luminescence Quenching and Cyclic Voltammetry .....                                     | S31–44  |
| b. Cyclopropane Ring-Opening .....                                                         | S45     |
| c. Light On/Off Experiments .....                                                          | S45–46  |
| d. Alternative Hypotheses .....                                                            | S47–52  |
| i. Azole Radical Addition .....                                                            | S47–48  |
| ii. (PhSe) <sub>2</sub> Redox Mediation .....                                              | S49–51  |
| iii. PC-I Oxidative Quenching Cycle .....                                                  | S52     |
| e. Proposed Mechanisms for Side Product Formation .....                                    | S53–54  |
| 6. References .....                                                                        | S54–55  |
| 7. <sup>1</sup> H, <sup>13</sup> C{ <sup>1</sup> H}, and <sup>19</sup> F NMR Spectra ..... | S56–194 |

### 1. General Synthetic Information

Air- and moisture-sensitive reactions were carried out in oven-dried one-dram vials sealed with poly(tetrafluoroethylene) (PTFE)-lined septa or glassware sealed with rubber septa under an atmosphere of dry nitrogen or argon. Plastic syringes equipped with stainless-steel needles were used to transfer air- and moisture-sensitive liquid reagents. Reactions were stirred using Teflon-coated magnetic stir bars, and elevated temperatures were maintained using thermostat-controlled heating mantles. Light-promoted reactions were

conducted using an EvoluChem PhotoRedOx Box photoreactor equipped with a Kessil PR160L 427 nm light with a peak intensity at 427 nm operating at 40 W. Organic solvents were removed using a rotary evaporator with a diaphragm vacuum pump. Thin-layer analytical chromatography was performed on UNIPATE Silica Gel HLF UV254 plates, and spots were visualized by quenching of ultraviolet light ( $\lambda = 254$  nm). Purification of products was accomplished by automated flash column chromatography on silica gel (VWR Common Silica Gel 60 Å, 40–60  $\mu\text{m}$ ), C18 silica gel (Teledyne RediSep Gold C18 High Performance Columns, 100 Å, 20–40  $\mu\text{m}$ ), or UNIPATE Silica Gel HLF UV254 plates.

Unless otherwise noted, reagents were purchased from various commercial sources and used as received. Specifically, anhydrous PhMe (99.8%) and DCE (99.8%) were purchased from Thermo Fisher Scientific and stored in a  $\text{N}_2$  glovebox. The highest available grade of purity of azoles were purchased and stored in a  $\text{N}_2$  glovebox.

Nuclear magnetic resonance (NMR) spectroscopy was performed on either Bruker NEO 500 ( $^1\text{H}$  at 500 MHz,  $^{13}\text{C}\{^1\text{H}\}$  at 126 MHz, and  $^{19}\text{F}$  at 470 MHz) or Bruker Avance III 800 with QCI cryoprobe ( $^1\text{H}$  at 800 and  $^{13}\text{C}\{^1\text{H}\}$  at 201 MHz) NMR spectrometers.  $^1\text{H}$  NMR spectra were calibrated against the peak of the residual  $\text{CHCl}_3$  (7.26 ppm).  $^{13}\text{C}\{^1\text{H}\}$  NMR spectra were calibrated against the peak of  $\text{CDCl}_3$  (77.2 ppm) or  $(\text{CD}_3)_2\text{CO}$  (206.3 ppm).  $^{19}\text{F}$  NMR spectra were calibrated against the peak of  $\text{CFCl}_3$  (0.0 ppm). NMR data are represented as follows: chemical shift (ppm), multiplicity (s = singlet, d = doublet, t = triplet, q = quartet, p = pentet, m = multiplet), coupling constant in hertz (Hz), integration. High-resolution mass determinations were obtained by electrospray ionization (ESI) or atmospheric-pressure chemical ionization (APCI) on a Waters LCT Premier mass spectrometer. Uncorrected melting points were measured on a Chemglass Digital Melting Point apparatus.

The chemical abbreviations utilized in this document include nitrogen ( $\text{N}_2$ ), water ( $\text{H}_2\text{O}$ ), methanol ( $\text{MeOH}$ ), ethyl acetate ( $\text{EtOAc}$ ), 1,2-dichloroethane (DCE), toluene (PhMe), acetonitrile ( $\text{MeCN}$ ), diethyl ether ( $\text{Et}_2\text{O}$ ), acetic acid ( $\text{AcOH}$ ), *N,N*-dimethylacetamide (DMAc), tetrahydrofuran (THF), 2,4,6-triisopropylbenzenethiol (TRIP-SH), *N*-hydroxyphthalimide (NHP), *N,N*-dimethylformamide (DMF), sodium sulfate ( $\text{Na}_2\text{SO}_4$ ), melting point (MP), glassy carbon (GC), tetra-*n*-butylammonium hexafluorophosphate ( $\text{NBu}_4\text{PF}_6$ ), quasi reference electrode (QRE), ferrocene/ferrocenium ( $\text{Fc}/\text{Fc}^+$ ), liquid chromatography mass spectroscopy (LCMS), electrospray ionization (ESI), and atmospheric pressure chemical ionization (APCI).



## 2. Reaction Development

**Table S1.** Initial reaction development.

| entry | photocatalyst                                         | $E_{1/2}[\text{PC}^{*n}/\text{PC}^{n-1}]$ (V vs. $\text{Fc}/\text{Fc}^+$ ) | additive                     | % conv. <b>10a</b> | % yield <b>11aa</b> | % yield <b>12</b> | % yield <b>13</b> |
|-------|-------------------------------------------------------|----------------------------------------------------------------------------|------------------------------|--------------------|---------------------|-------------------|-------------------|
| 1     | $[\text{Ir}(\text{dtbbpy})(\text{ppy})_2]\text{PF}_6$ | +0.28 <sup>1</sup>                                                         | none                         | <5                 | 0                   | 0                 | N.A.              |
| 2     | Rose Bengal lactone                                   | +0.28 <sup>2</sup>                                                         | none                         | <5                 | 0                   | 0                 | N.A.              |
| 3     | Eosin Y (dibasic)                                     | +0.45 <sup>2</sup>                                                         | none                         | <5                 | 0                   | 0                 | N.A.              |
| 4     | 4CzIPN                                                | +1.00 <sup>2</sup>                                                         | none                         | 67                 | <1                  | 66                | N.A.              |
| 5     | <b>PC-I</b>                                           | +1.30 <sup>3</sup>                                                         | none                         | 69                 | 5                   | 64                | N.A.              |
| 6     | <b>PC-II</b>                                          | +1.70 <sup>4</sup>                                                         | none                         | 66                 | <1                  | 64                | N.A.              |
| 7     | <b>PC-I</b>                                           | +1.30 <sup>3</sup>                                                         | <i>m</i> -anisidine (10%)    | 61                 | 3                   | 56                | 0                 |
| 8     | <b>PC-I</b>                                           | "                                                                          | TRIP-SH (30%)                | 53                 | 3                   | 44                | 0                 |
| 9     | <b>PC-I</b>                                           | "                                                                          | NHP (50%)                    | 72                 | <1                  | 66                | 0                 |
| 10    | <b>PC-I</b>                                           | "                                                                          | (TMS) <sub>3</sub> SiH (50%) | 70                 | 8                   | 56                | 0                 |
| 11    | <b>PC-I</b>                                           | "                                                                          | Ph <sub>3</sub> SiH (50%)    | >99                | 21                  | 4                 | N.D.              |
| 12    | <b>PC-I</b>                                           | "                                                                          | (PhS) <sub>2</sub> (20%)     | >99                | 26                  | 42                | 17 (X = SPh)      |
| 13    | <b>PC-I</b>                                           | "                                                                          | (BnS) <sub>2</sub> (20%)     | 81                 | 4                   | 68                | 0                 |
| 14    | <b>PC-I</b>                                           | "                                                                          | (BnSe) <sub>2</sub> (20%)    | 82                 | 21                  | 44                | <1 (X = F)        |
| 15    | <b>PC-I</b>                                           | "                                                                          | (PhSe) <sub>2</sub> (20%)    | >99                | 81                  | 4                 | 2 (X = F)         |
| 16    | <b>PC-I</b>                                           | "                                                                          | (PhSe) <sub>2</sub> (5%)     | >99                | 93                  | 0                 | 0                 |
| 17    | <b>PC-I</b> , no light                                | "                                                                          | (PhSe) <sub>2</sub> (5%)     | <5                 | 0                   | 0                 | 0                 |
| 18    | none                                                  | "                                                                          | (PhSe) <sub>2</sub> (5%)     | <5                 | 0                   | <1                | 0                 |

See S4–5 for reaction procedures.

**Table S2.** Solvent screening.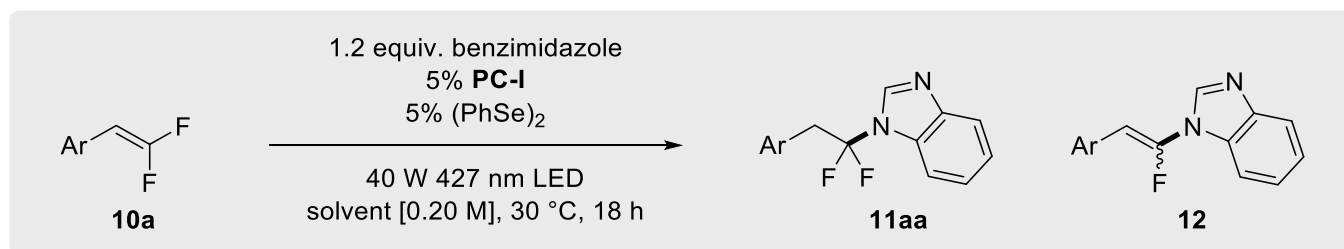

| entry | solvent | % conv. <b>10a</b> | % yield <b>11aa</b> | % yield <b>12</b> |
|-------|---------|--------------------|---------------------|-------------------|
| 1     | DCE     | >99                | 93                  | 0                 |
| 2     | MeCN    | 85                 | 17                  | 54                |
| 3     | PhMe    | >99                | 60                  | 0                 |
| 4     | DMAc    | 71                 | 0                   | 46                |
| 5     | THF     | 93                 | 61                  | 12                |

**Table S3.** (PhSe)<sub>2</sub> equivalents optimization.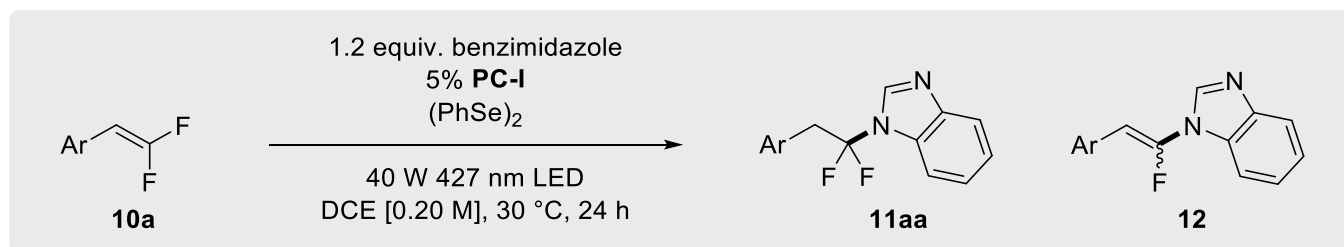

| entry | % (PhSe) <sub>2</sub> | % conv. <b>10a</b> | % yield <b>11aa</b> | % yield <b>11</b> |
|-------|-----------------------|--------------------|---------------------|-------------------|
| 1     | 0                     | 77                 | 4                   | 64                |
| 2     | 5                     | >99                | 87                  | 2                 |
| 3     | 10                    | >99                | 64                  | 3                 |
| 4     | 20                    | >99                | 63                  | 3                 |

**Table S4.** **PC-II** equivalents optimization.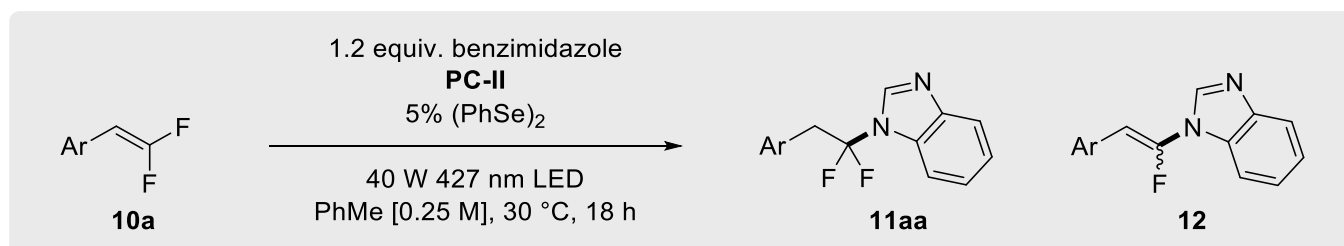

| entry | % <b>PC-II</b> | % conv. <b>10a</b> | % yield <b>11aa</b> | % yield <b>12</b> |
|-------|----------------|--------------------|---------------------|-------------------|
| 1     | 1.2            | >99                | 61                  | 4                 |
| 2     | 3              | >99                | 71                  | 12                |
| 3     | 5              | >99                | 68                  | 16                |

Oven-dried one-dram vials equipped with magnetic stir bars were brought into a N<sub>2</sub> glovebox. The vials were each charged with *gem*-difluoroalkene **10a** (11.5 mg, 50.0 μmol), benzimidazole (7.1 mg, 60 μmol), additive (2.50–25.0 μmol), photocatalyst (0.50–2.5 μmol), and dry solvent (0.25 or 0.20 mL, 0.20 or 0.25 M). The vials were then removed from the glovebox, sealed with PTFE-lined septa, and irradiated by a 40 W 427 nm LED

lamp cooled by a fan (30 °C) for 18 or 24 h. Upon completion, an internal standard of (trifluoromethyl)benzene (4.1  $\mu$ L, 33.3  $\mu$ mol) was mixed into each crude reaction. The reactions were diluted with acetone or CDCl<sub>3</sub> (reaction solvent:dilution solvent = ~1:1). Aliquots of the reaction mixtures were subsequently transferred to NMR tubes and analyzed by <sup>19</sup>F NMR. Spectra were baseline corrected, phased, and integrated using MestReNova. Compound identity assignments were supported by LCMS (ESI<sup>+</sup>) analysis.

<sup>19</sup>F NMR (470 MHz, ~1:1 DCE/CDCl<sub>3</sub>): (trifluoromethyl)benzene  $\delta$  -64.00 (s); side product **13** (X = F)  $\delta$  -67.28 (t,  $J$  = 9.93 Hz); side product **13** (X = SPh)  $\delta$  -72.89 (t,  $J$  = 15.2 Hz); product **11aa**  $\delta$  -79.44 (t,  $J$  = 12.8 Hz); *gem*-difluoroalkene **10a**  $\delta$  -84.59 (t,  $J$  = 30.1 Hz), -86.60 (d,  $J$  = 34.6 Hz); side product **12**  $\delta$  -87.18 (d,  $J$  = 8.8 Hz), -95.64 (d,  $J$  = 31.0 Hz); [ns = 16; D1 = 3 s].

<sup>19</sup>F NMR (470 MHz, ~1:1 MeCN:acetone): (trifluoromethyl)benzene  $\delta$  -64.00 (s); product **11aa**  $\delta$  -78.76 (t,  $J$  = 13.7 Hz); *gem*-difluoroalkene **10a**  $\delta$  -85.96 (dd,  $J$  = 37.1, 25.9 Hz), -88.04 (d,  $J$  = 37.1 Hz); side product **12**  $\delta$  -86.86 (d,  $J$  = 8.6 Hz), -96.62 (d,  $J$  = 32.0 Hz); [ns = 16; D1 = 3 s].

<sup>19</sup>F NMR (470 MHz, ~1:1 PhMe:acetone): (trifluoromethyl)benzene  $\delta$  -64.00 (s); product **11aa**  $\delta$  -78.68 (t,  $J$  = 13.3 Hz); side product **12**  $\delta$  -86.72 (d,  $J$  = 8.0 Hz), -96.60 (d,  $J$  = 32.1 Hz); [ns = 16; D1 = 3 s].

<sup>19</sup>F NMR (470 MHz, ~1:1 DMAc:acetone): (trifluoromethyl)benzene  $\delta$  -64.00 (s); *gem*-difluoroalkene **10a**  $\delta$  -86.27 (dd,  $J$  = 38.6, 29.0 Hz), -88.41 (d,  $J$  = 38.6 Hz); side product **12**  $\delta$  -86.58 (s), -96.85 (d,  $J$  = 32.4 Hz); [ns = 16; D1 = 3 s].

<sup>19</sup>F NMR (470 MHz, ~1:1 THF:acetone): (trifluoromethyl)benzene  $\delta$  -64.00 (s); product **11aa**  $\delta$  -78.60 (t,  $J$  = 13.9 Hz); *gem*-difluoroalkene **10a**  $\delta$  -86.18 (dd,  $J$  = 37.9, 27.5 Hz), -88.27 (d,  $J$  = 38.5 Hz); side product **12**  $\delta$  -86.76 (d,  $J$  = 7.8 Hz), -96.60 (d,  $J$  = 32.4 Hz); [ns = 16; D1 = 3 s].

**Table S5.** 0.050 mmol scale substrate scope data.

1.2 equiv

**PC-I Conditions:** 5% **PC-I**, DCE [0.25M]  
**PC-II Conditions:** 3% **PC-II**, PhMe [0.25M]

### Examples with 0.50 mmol Scale Reproducibility Issues

**PC-I:** 58% ( $N_x:N_y = 1.4:1$ ), >99% conv.

**PC-I:** 41% ( $N_x:N_y = 1.6:1$ ), 88% conv.

**PC-II:** 27% ( $N_x:N_y = 1.3:1$ ), 30% conv.

### Low-Yielding Imidazole Example

**PC-I:** 4%, 74% conv., 38% ArCH=CFN(imidazole)

**PC-II:** 4%, 12% conv., 12% ArCH=CFN(imidazole)

### Additional Indazole-Coupled Examples with High $N_2$ -Regioselectivity

**PC-I:** 60% ( $N_2:N_1 = 7.6:1$ ), >99% conv.

**PC-II:** 48% ( $N_2:N_1 = 15:1$ ), >99% conv.

**PC-I:** 58% ( $N_2:N_1 = 57:1$ ), >99% conv.

**PC-II:** 64% ( $N_2:N_1 = 8:1$ ), >99% conv.

**PC-I:** 78% ( $N_2:N_1 = 19:1$ ), >99% conv.

**PC-II:** 71% ( $N_2:N_1 = 13:1$ ), 96% conv.

**PC-I:** 65% ( $N_2:N_1 = 21:1$ ), >99% conv.

**PC-II:** 55% ( $N_2:N_1 = 4.5:1$ ), >99% conv.

See S7 for detailed reaction procedure.

**Table S6.** 0.050 mmol scale substrate scope data.

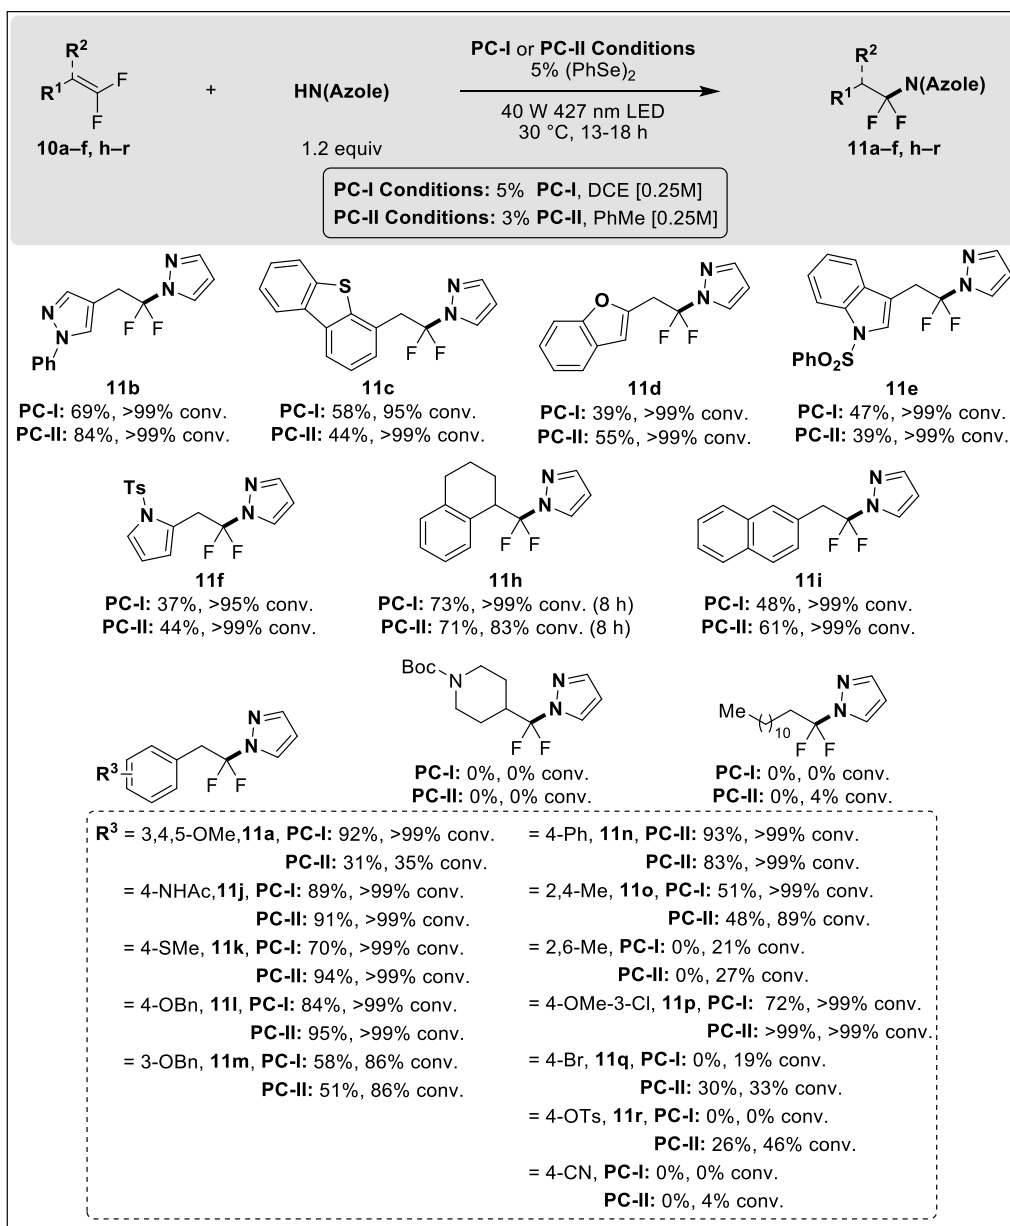

Oven-dried one-dram vials equipped with magnetic stir bars were brought into a N<sub>2</sub> glovebox. The vials were each charged with *gem*-difluoroalkene (50 μmol, 1.0 equiv.), azole (60 μmol, 1.0 equiv.) and 1,2-diphenyldisilane (0.8 mg, 3 μmol, 0.05 equiv). Then, either [5,5'-bis(trifluoromethyl)-2,2'-bipyridine-*N*1,*N*1']bis[3,5-difluoro-2-[5-(trifluoromethyl)-2-pyridinyl-*N*]phenyl-*C*]iridium(III) hexafluorophosphate (**PC-I**, 2.9 mg, 2.5 μmol, 0.050 equiv) and dry DCE (0.20 mL, **PC-I Conditions**) or 9-mesityl-3,6-di-*tert*-butyl-10-phenylacridinium tetrafluoroborate (**PC-II**, 0.9 mg, 2 μmol, 0.03 equiv) and dry PhMe (0.20 mL, **PC-II Conditions**) were added. The vials were then removed from the glovebox, sealed with PTFE-lined septa, and irradiated by a 40 W 427 nm LED lamp cooled by a fan (30 °C) for 13–18 h. Upon completion, an internal standard of (trifluoromethyl)benzene (10.0 μL, 81.4 μmol) was mixed into each crude reaction. The reactions were diluted with acetone (reaction solvent:acetone = ~1:1). Aliquots of the reaction mixtures were subsequently transferred to NMR tubes and analyzed by <sup>19</sup>F NMR. Spectra were baseline corrected, phased, and integrated using MestReNova. All yield, selectivity, and conversion values reported in Tables S1 and S2 were determined by <sup>19</sup>F NMR. Compound identity assignments were supported by LCMS (ESI<sup>+</sup>) analysis.

### 3. Synthesis and Characterization

#### Preparation of *gem*-difluoroalkene substrates

Chart S1. Prepared *gem*-difluoroalkene substrates

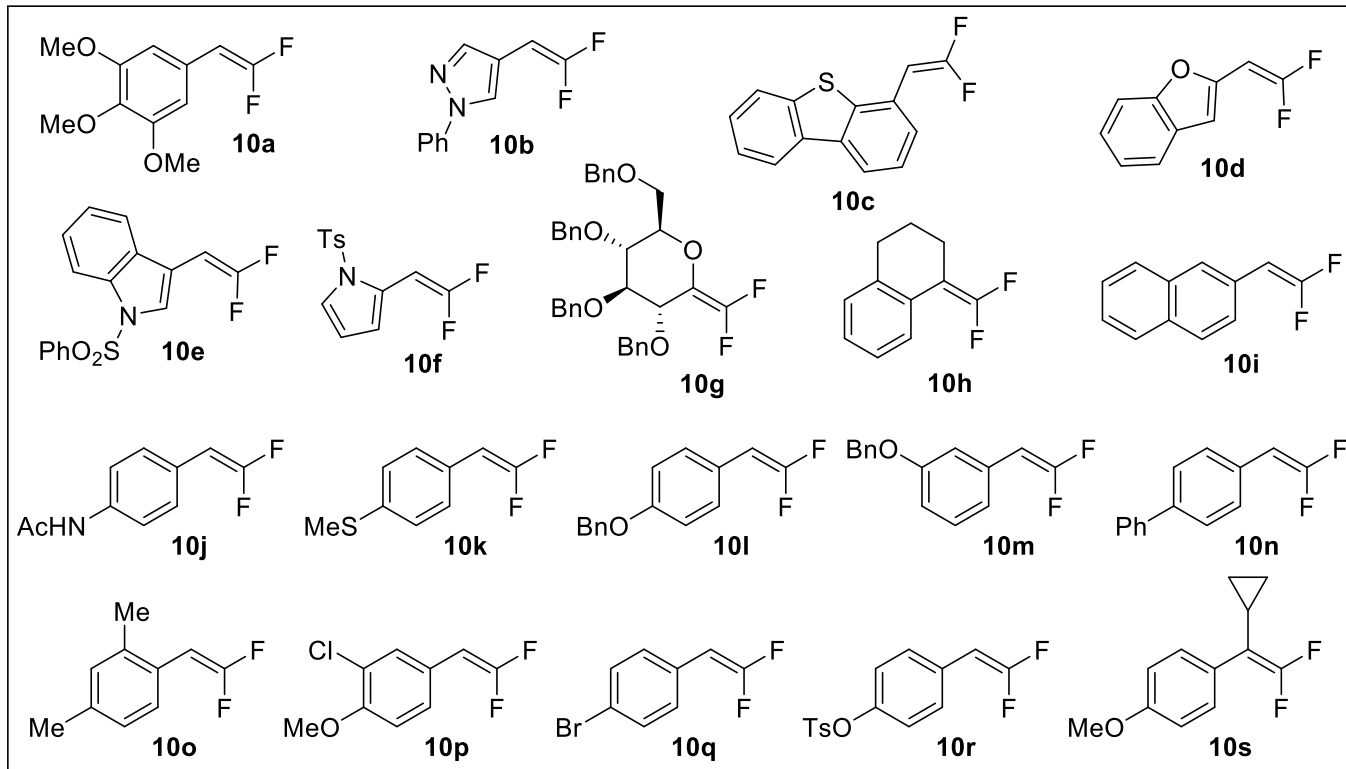

*gem*-Difluoroalkenes **10a**,<sup>b,c,k,l,n,q,r,5</sup> **10d**,<sup>6</sup> **10e**,<sup>7</sup> **10g**,<sup>8</sup> and **10o**<sup>9</sup> were prepared according to reported procedures. **10d**, **10f**, **10h**, **10i**, **10j**, **10p**, and **10s** were prepared by procedures that had not previously been utilized for their syntheses (see below).

#### General Procedure A, for the Synthesis of *gem*-Difluoroalkenes

Following a previously reported procedure,<sup>10</sup> a flame-dried three-neck flask equipped with an addition funnel, thermometer adapter and thermometer, rubber septa, and PTFE-coated magnetic stir bar was charged with aldehyde (1.0 equiv.) and triphenylphosphine (1.5 equiv.). The flask was subsequently evacuated and backfilled with N<sub>2</sub> (3x), then charged with anhydrous DMF [0.33 M] and heated to 80 °C. Separately, potassium 2-bromo-2,2-difluoroacetate (1.8 equiv.) was added to a flask that was subsequently evacuated and backfilled with N<sub>2</sub> (3x) and charged with anhydrous DMF (enough to dissolve salt, ≥10 mL). This potassium 2-bromo-2,2-difluoroacetate solution was transferred to the addition funnel and dripped into the reaction mixture over the course of ~10 min such that the reaction temperature did not exceed 90 °C. The reaction was stirred at 80 °C for 1 h.

Upon completion, the reaction mixture was allowed to cool to rt, quenched with H<sub>2</sub>O (equivalent volume to reaction DMF), and diluted with Et<sub>2</sub>O (equivalent volume to reaction DMF). The Et<sub>2</sub>O layer was then removed in a separatory funnel, and the aqueous layer was washed with additional Et<sub>2</sub>O (3x). The combined organic fractions were washed with 10% LiCl in H<sub>2</sub>O (3x), brine (1x), and dried over Na<sub>2</sub>SO<sub>4</sub>. MeI (2.0 equiv) was then added to the combined organic fractions, and the resulting mixture was stirred for 12–16 h at rt. The mixture was then pumped dry *in vacuo*, resuspended in Et<sub>2</sub>O/hexanes (1:1), filtered through a plug of silica to remove methyltriphenylphosphonium iodide, and purified by normal-phase silica gel flash chromatography to provide the desired product in >95% purity.

## General Procedure B, for the Synthesis of *gem*-Difluoroalkenes

Following a previously reported procedure,<sup>11</sup> a flame-dried flask with a magnetic stir bar was charged with 2-((difluoromethyl)sulfonyl)pyridine (1.0 equiv.) and aldehyde/ketone (1.2 equiv.). The flask was then evacuated and backfilled with N<sub>2</sub> (3x), charged with anhydrous DMF [0.25 M], and cooled to -50 °C using a MeOH/H<sub>2</sub>O (1:1) and dry ice bath. Separately, a flame-dried flask was charged with potassium 2-methylpropan-2-olate (1.80 equiv.), evacuated and backfilled with N<sub>2</sub> (3x), charged with anhydrous DMF [0.90 M], and cooled to -50 °C. This potassium 2-methylpropan-2-olate solution was then added to the reaction mixture in a dropwise fashion such that the reaction temperature remained between -50 and -40 °C. The resulting mixture was stirred at -50 °C for 1 h. Then, the reaction was quenched with sat. aq. NH<sub>4</sub>Cl (one-half of reaction DMF volume) followed by dropwise addition of 6 M aq. HCl (5 equiv.). The resulting mixture was attached to a bubbler (extrusion of SO<sub>2</sub> gas occurs in this step of the reaction), removed from the cold bath, and stirred at 60 °C for 1 h. Upon completion of the reaction, the mixture was transferred to a separatory funnel, diluted with Et<sub>2</sub>O, and then extracted with H<sub>2</sub>O (3x) followed by 10% LiCl in H<sub>2</sub>O (3x). The resulting organic layer was dried over Na<sub>2</sub>SO<sub>4</sub> and purified by normal-phase silica gel flash chromatography to provide the desired product in >95% purity.

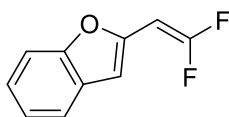

**2-(2,2-difluorovinyl)benzofuran (10d):** Following general procedure A, benzofuran-2-carbaldehyde (2.19 g, 15.0 mmol) reacted with triphenylphosphine (5.90 g, 22.5 mmol) and potassium 2-bromo-2,2-difluoroacetate (5.75 g, 27.0 mmol) in DMF (45 mL, [0.33 M]) at 80 °C for 1 h. The reaction was quenched and extracted according to the general procedure, then stirred with MeI (1.9 mL, 30 mmol) at rt for 14 h. The material was isolated according to the general procedure and purified by normal-phase flash chromatography using hexanes to furnish desired product **10d** as a dark red oil (2.41 g, 89%). <sup>1</sup>H NMR spectrum matches a previous report.<sup>12</sup>

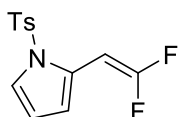

**2-(2,2-difluorovinyl)-1-tosyl-1H-pyrrole (10f):** Following general procedure A, 1-tosyl-1H-pyrrole-2-carbaldehyde (2.69 g, 10.8 mmol) reacted with triphenylphosphine (4.24 g, 16.2 mmol) and potassium 2-bromo-2,2-difluoroacetate (4.13 g, 19.4 mmol) in DMF (33 mL, [0.33 M]) at 80 °C for 1 h. The reaction was quenched and extracted according to the general procedure, then stirred with MeI (1.4 mL, 22 mmol) at rt for 14 h. The material was isolated according to the general procedure and purified by normal-phase flash chromatography using EtOAc and hexanes (0→5% EtOAc) to furnish desired product **10f** as a purple solid (2.15 g, 70%). <sup>1</sup>H NMR (500 MHz, CDCl<sub>3</sub>) δ 7.67–7.65 (m, 2H), 7.32 (dd, *J* = 3.3, 1.7 Hz, 1H), 7.30–7.28 (m, 2H), 6.35–6.33 (m, 1H), 6.29 (t, *J* = 3.4 Hz, 1H), 5.95 (dd, *J* = 24.8, 2.4 Hz, 1H), 2.41 (s, 3H). <sup>13</sup>C{<sup>1</sup>H} NMR (126 MHz, CDCl<sub>3</sub>) δ 156.4 (dd, *J* = 298.0, 288.1 Hz), 145.4, 135.9, 130.2, 126.9, 123.9 (t, *J* = 7.7 Hz), 123.0, 114.6 (dd, *J* = 9.7, 3.1 Hz), 112.7, 73.2 (dd, *J* = 36.6, 13.9 Hz), 21.8. <sup>19</sup>F NMR (470 MHz, CDCl<sub>3</sub>) δ -80.59 (t, *J* = 23.7 Hz, 1F), -84.65 (d, *J* = 22.4 Hz, 1F). MP 71–73 °C. HRMS (APCI)<sup>+</sup> *m/z*: [M + H]<sup>+</sup> calc'd for C<sub>13</sub>H<sub>12</sub>F<sub>2</sub>NO<sub>2</sub>S<sup>+</sup> 284.0551, found 284.0545.

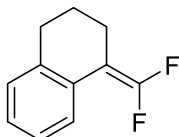

**1-(difluoromethylene)-1,2,3,4-tetrahydronaphthalene (10h):** Following general procedure B, 2-((difluoromethyl)sulfonyl)pyridine (0.750 g, 3.88 mmol), 3,4-dihydronaphthalene-1(2H)-one (0.620 mL, 4.66 mmol), and potassium 2-methylpropan-2-olate (0.784 g, 6.99 mmol) were reacted in DMF (23 mL, [0.20 M]) at -50 °C for 1 h. The reaction was then charged with sat. aq. NH<sub>4</sub>Cl (12 mL) and 6 M aq. HCl (6 mL, 5 equiv.) and stirred at 60 °C for 1 h. The material was isolated according to the general procedure and purified by normal-

phase flash chromatography using pentane to furnish desired product **10h** as a colorless oil (0.420 g, 60%). <sup>1</sup>H NMR spectrum matches a previous report.<sup>8</sup>

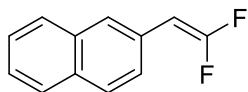

**2-(2,2-difluorovinyl)naphthalene (10i)**: Following general procedure A, 2-naphthaldehyde (2.34 g, 15.0 mmol) reacted with triphenylphosphine (5.90 g, 22.5 mmol) and potassium 2-bromo-2,2-difluoroacetate (5.75 g, 27.0 mmol) in DMF (45 mL, [0.33 M]) at 80 °C for 1 h. The reaction was quenched and extracted according to the general procedure, then stirred with MeI (1.9 mL, 30 mmol) at rt for 14 h. The material was isolated according to the general procedure and purified by normal-phase flash chromatography using pentane to furnish desired product **10i** as a colorless solid (1.60, 56%). <sup>1</sup>H NMR spectrum matches a previous report.<sup>13</sup>

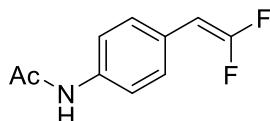

**N-(4-(2,2-difluorovinyl)phenyl)acetamide (10j)**: Following general procedure B, 2-((difluoromethyl)sulfonyl)pyridine (0.483 g, 2.50 mmol), 3,4-dihydronaphthalene-1(2*H*)-one (0.490 g, 3.00 mmol), and potassium 2-methylpropan-2-olate (0.505 g, 4.50 mmol) were reacted in DMF (12 mL, [0.20 M]) at -50 °C for 1 h. The reaction was then charged with sat. aq. NH<sub>4</sub>Cl (6 mL) and 6 M aq. HCl (2 mL, 5 equiv) and stirred at 60 °C for 1 h. The material was isolated according to the general procedure and purified by normal-phase flash chromatography using EtOAc and hexanes (0→50% EtOAc) to afford desired product **10j** as a yellow solid (0.660 g, 67%). <sup>1</sup>H NMR spectrum matches a previous report.<sup>6</sup>

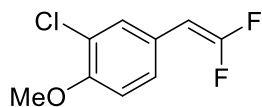

**2-chloro-4-(2,2-difluorovinyl)-1-methoxybenzene (10p)**: Following general procedure A, 3-chloro-4-methoxybenzaldehyde (2.56 g, 15.0 mmol) reacted with triphenylphosphine (5.90 g, 22.5 mmol) and potassium 2-bromo-2,2-difluoroacetate (5.75 g, 27.0 mmol) in DMF (45 mL, [0.33 M]) at 80 °C for 1 h. The reaction was quenched and extracted according to the general procedure, then stirred with MeI (1.9 mL, 30 mmol) at rt for 14 h. The material was isolated according to the general procedure and purified by normal-phase flash chromatography using EtOAc and hexanes (0→5% EtOAc) to furnish desired product **10p** as a pale yellow oil (1.87 g, 61%). <sup>1</sup>H NMR spectrum matches a previous report.<sup>14</sup>

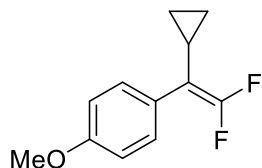

**1-(1-cyclopropyl-2,2-difluorovinyl)-4-methoxybenzene (10s)**: Following a previously reported procedure,<sup>15</sup> a flame-dried flask equipped with a magnetic PTFE-coated stir bar was charged with cyclopropyl(4-methoxyphenyl)methanone (0.881 g, 5.00 mmol), 2,2-difluoro-2-(tris(dimethylamino)phosphonio)acetate (2.57 g, 10.0 mmol), and evacuated and backfilled with N<sub>2</sub>. A mixture of PhMe/DMAc (3:1, 60 mL, [0.083 M]) was then added, and the reaction was stirred at 100 °C for 3 h. Upon completion, the reaction was cooled to rt, quenched with H<sub>2</sub>O (60 mL) and diluted with Et<sub>2</sub>O (60 mL). The organic layer was washed with H<sub>2</sub>O (5x), 10% LiCl in H<sub>2</sub>O (3x), and dried over Na<sub>2</sub>SO<sub>4</sub>. The material was then purified by normal-phase flash chromatography using EtOAc and hexanes (0→10% EtOAc) to furnish desired product **10s** as a yellow-orange oil (0.21 g, 20%). <sup>1</sup>H NMR spectrum matches a previous report.<sup>14</sup>



## **Hydroazolation of *gem*-difluoroalkenes**

### **General Procedure C, for the Photochemical Hydroazolation of *gem*-Difluoroalkenes (PC-I Conditions):**

An oven-dried one-dram vial equipped with a magnetic stir bar was charged with *gem*-difluoroalkene (0.50 mmol, 1.0 equiv), azole (0.60 mmol, 1.2 equiv.), 1,2-diphenyldisilane (0.025 mmol, 0.050 equiv), and [5,5'-bis(trifluoromethyl)-2,2'-bipyridine-*N*1,*N*1']bis[3,5-difluoro-2-[5-(trifluoromethyl)-2-pyridinyl-*M*]phenyl-*C*]iridium(III) hexafluorophosphate (**PC-I**, 0.025 mmol, 0.050 equiv). The system was sealed with PTFE-lined septa and subsequently evacuated and backfilled with N<sub>2</sub> (3x). Dry DCE (2.0 mL, 0.25 M) was added *via* a syringe, and the vial was irradiated by a 40 W 427 nm LED lamp cooled by a fan (30 °C). Upon completion, the reaction mixture was purified by flash chromatography\* to provide the desired product in >95% purity.

### **General Procedure D, for the Photochemical Hydroazolation of *gem*-Difluoroalkenes (PC-II Conditions):**

An oven-dried one-dram vial equipped with a magnetic stir bar was charged with *gem*-difluoroalkene (0.50 mmol, 1.0 equiv), azole (0.60 mmol, 1.2 equiv.), 1,2-diphenyldisilane (0.025 mmol, 0.050 equiv), and 9-mesityl-3,6-di-*tert*-butyl-10-phenylacridinium tetrafluoroborate (**PC-II**, 0.015 mmol, 0.030 equiv). The system was sealed with PTFE-lined septa and subsequently evacuated and backfilled with N<sub>2</sub> (3x). Dry PhMe (2.0 mL, 0.25 M) was added *via* a syringe, and the vial was irradiated by a 40 W 427 nm LED lamp cooled by a fan (30 °C). Upon completion, the reaction mixture was filtered through a pad of silica using Et<sub>2</sub>O or EtOAc (~100 mL) to remove the photocatalyst, concentrated *in vacuo*, and purified by flash chromatography\* to provide the desired product in >95% purity.

---

\* To separate (PhSe)<sub>2</sub>, for normal-phase chromatographic purifications, the material was washed with 100% hexane or pentane until (PhSe)<sub>2</sub> eluted from the column

## Photoreactor

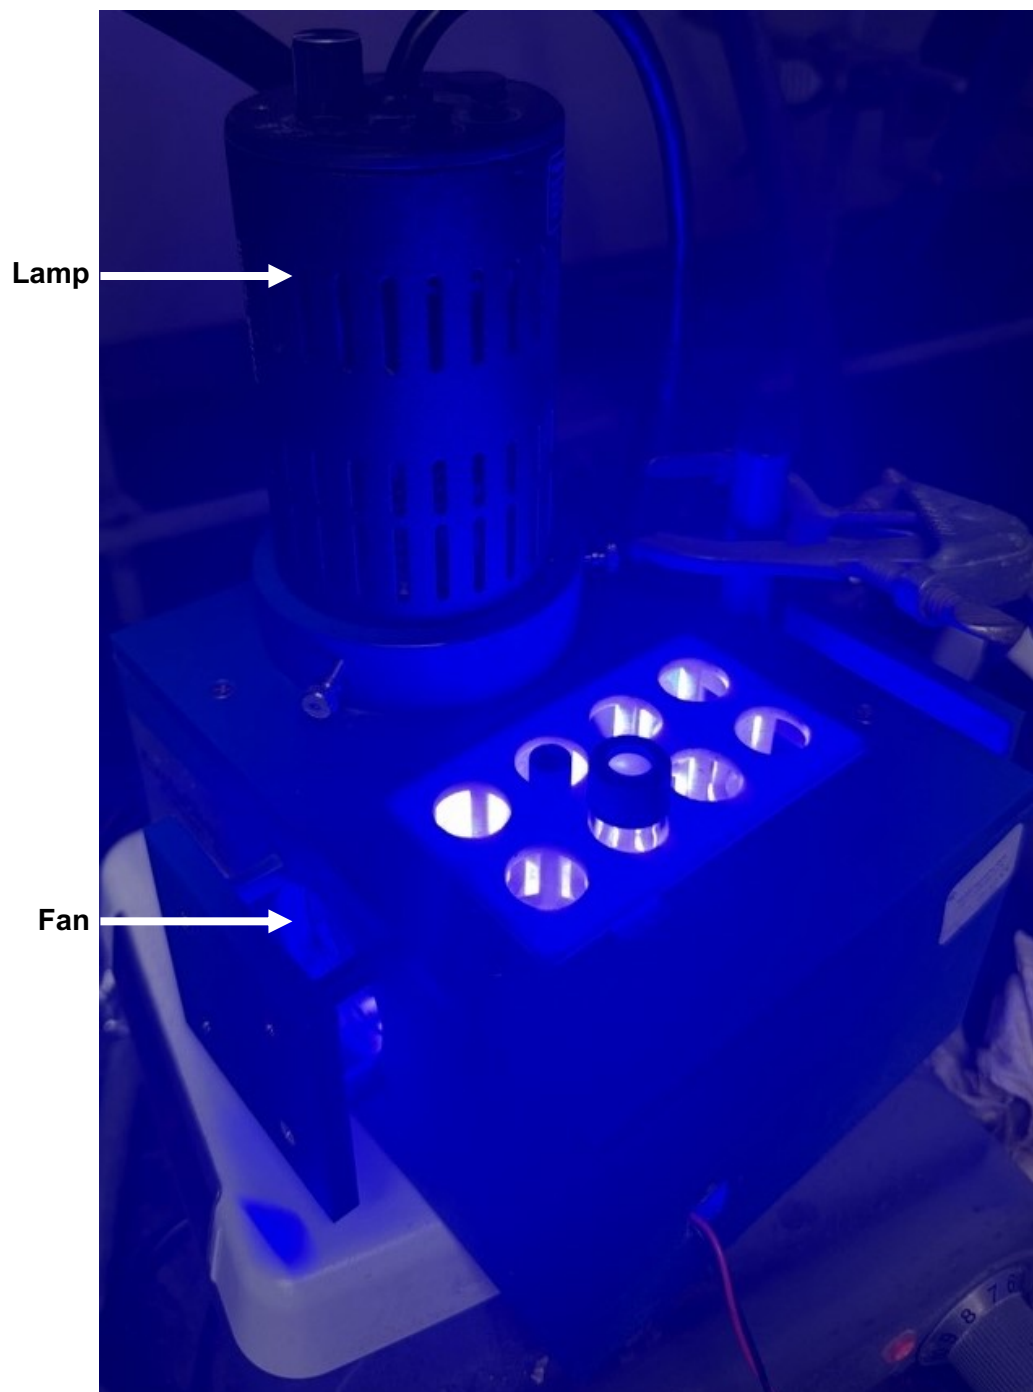

**Lamp:** Kessil PR160L-427 (427 nm light at 40 W)

**Fan:** Orion Fans, 40x40x10.5 mm, 0.258 m<sup>3</sup>/min (manufacturer part #: OD4010-12HB)

**Photoreactor:** EvoluChem PhotoRedOx Box

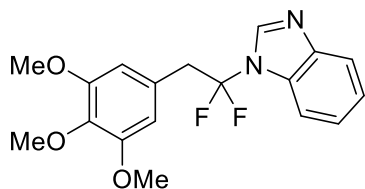

**1-(1,1-difluoro-2-(3,4,5-trimethoxyphenyl)ethyl)-1H-benzo[d]imidazole (11aa):** Following general procedure C, *gem*-difluoroalkene **10a** (0.115 g, 0.500 mmol) was reacted with benzimidazole (0.071 g, 0.60 mmol) in the presence of 1,2-diphenyldisilane (7.8 mg, 0.025 mmol) and [5,5'-bis(trifluoromethyl)-2,2'-bipyridine-*N*1,*N*1']bis[3,5-difluoro-2-[5-(trifluoromethyl)-2-pyridinyl-*N*]phenyl-*C*]iridium(III) hexafluorophosphate (28.6 mg, 0.0250 mmol) in dry DCE (2.0 mL) using a 40 W 427 nm LED cooled by a fan for 24 h. The material was isolated according to the general procedure and purified by normal-phase flash chromatography using EtOAc and hexanes (0→40% EtOAc) to furnish the desired product **11aa** as a colorless oil (0.149 g, 86%). <sup>1</sup>H NMR (500 MHz, CDCl<sub>3</sub>) δ 7.88 (s, 1H), 7.83 (dd, *J* = 6.6, 2.8 Hz, 1H), 7.53 (d, *J* = 6.0 Hz, 1H), 7.43–7.34 (m, 2H), 6.02 (s, 2H), 3.78 (s, 3H), 3.65 (t, *J* = 12.5 Hz, 2H), 3.61 (s, 6H). <sup>13</sup>C{<sup>1</sup>H} NMR (126 MHz, CDCl<sub>3</sub>) δ 153.4, 139.6, 138.3, 131.2, 125.3, 124.9, 124.1, 120.6, 120.2, 112.0, 107.1, 61.0, 56.1, 43.20 (t, *J* = 30.1 Hz). <sup>19</sup>F NMR (470 MHz, CDCl<sub>3</sub>) δ -78.04 (t, *J* = 14.2 Hz, 2F). HRMS (APCI)<sup>+</sup> *m/z*: [M + H]<sup>+</sup> calc'd for C<sub>18</sub>H<sub>19</sub>F<sub>2</sub>N<sub>2</sub>O<sub>3</sub><sup>+</sup> 349.1358, found 349.1366.

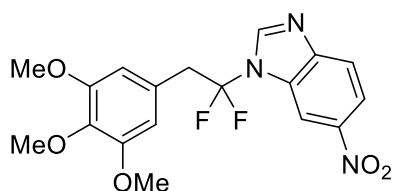

N1:N3 = (1.7:1)

**1-(1,1-difluoro-2-(3,4,5-trimethoxyphenyl)ethyl)-6- and -5-nitro-1H-benzo[d]imidazole (11ab):** Following general procedure C, *gem*-difluoroalkene **10a** (0.115 g, 0.500 mmol) was reacted with 5-nitro-1H-benzo[d]imidazole (0.098 g, 0.60 mmol) in the presence of 1,2-diphenyldisilane (7.8 mg, 0.025 mmol) and [5,5'-bis(trifluoromethyl)-2,2'-bipyridine-*N*1,*N*1']bis[3,5-difluoro-2-[5-(trifluoromethyl)-2-pyridinyl-*N*]phenyl-*C*]iridium(III) hexafluorophosphate (28.6 mg, 0.0250 mmol) in dry DCE (2.0 mL) using a 40 W 427 nm LED cooled by a fan for 24 h. The reaction produced a mixture of the two N-regioisomers of desired product **11ab** (N1:N3 = 1.7:1), as determined by <sup>19</sup>F NMR analysis of the crude reaction mixture. The material was isolated according to the general procedure and purified by reversed-phase flash chromatography using 0.1% AcOH in H<sub>2</sub>O and MeCN (0→100% MeCN) to furnish a mixture of the two N-regioisomers of desired product **11ab** (N1:N3 = 1.7:1) as a yellow solid (0.081 g, 41%). NMR data are reported for the major regioisomer, for which a fractional amount was purified from the mixture of regioisomers by preparative TLC using EtOAc and hexanes (20% EtOAc). Melting point and HRMS data were obtained from the mixture of regioisomers. <sup>1</sup>H NMR (500 MHz, CDCl<sub>3</sub>) δ 8.39 (s, 1H), 8.28 (dd, *J* = 8.9, 2.2 Hz, 1H), 8.01 (s, 1H), 7.91 (d, *J* = 8.9 Hz, 1H), 6.04 (s, 2H), 3.75 (s, 3H), 3.67 (t, *J* = 13.6 Hz, 2H), 3.64 (s, 6H). <sup>13</sup>C{<sup>1</sup>H} NMR (126 MHz, CDCl<sub>3</sub>) δ 153.7, 147.7, 145.0, 143.7, 138.6, 130.8, 124.6 (t, *J* = 4.6 Hz), 121.1, 120.2 (t, *J* = 258.9 Hz), 119.5, 108.9 (t, *J* = 3.4 Hz), 107.1, 61.0, 56.2, 44.0 (t, *J* = 29.7 Hz). <sup>19</sup>F NMR (470 MHz, CDCl<sub>3</sub>) δ -78.16 (t, *J* = 12.5 Hz, 2F). MP 161–166 °C. HRMS (APCI)<sup>+</sup> *m/z*: [M + H]<sup>+</sup> calc'd for C<sub>18</sub>H<sub>18</sub>F<sub>2</sub>N<sub>3</sub>O<sub>5</sub><sup>+</sup> 394.1209, found 394.1215. The N-regiochemical assignment for the major product was made using <sup>1</sup>H{<sup>19</sup>F} NOE (see S71) and X-ray crystallography (CCDC 2414748).

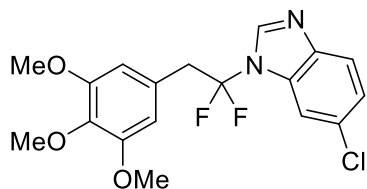

N1:N3 = (1.2:1)

**6-chloro-1-(1,1-difluoro-2-(3,4,5-trimethoxyphenyl)ethyl)-1H-benzo[d]imidazole (11ac):** Following general procedure C, *gem*-difluoroalkene **10a** (0.115 g, 0.500 mmol) was reacted with 5-chloro-1H-benzo[d]imidazole (0.076 g, 0.60 mmol) in the presence of 1,2-diphenyldisilane (7.8 mg, 0.025 mmol) and [5,5'-bis(trifluoromethyl)-2,2'-bipyridine-N1,N1']bis[3,5-difluoro-2-[5-(trifluoromethyl)-2-pyridinyl-N]phenyl-C]iridium(III) hexafluorophosphate (28.6 mg, 0.0250 mmol) in dry DCE (2.0 mL) using a 40 W 427 nm LED cooled by a fan for 24 h. The reaction produced a mixture of the two N-regioisomers of desired product **11ac** (N<sub>1</sub>:N<sub>3</sub> = 1.2:1), as determined by <sup>19</sup>F NMR analysis of the crude reaction mixture. The material was isolated according to the general procedure and purified by normal-phase flash chromatography using EtOAc and hexanes (0→40% EtOAc) to furnish a mixture of the two N-regioisomers of desired product **11ac** (N<sub>1</sub>:N<sub>3</sub> = 1.2:1) as a yellow solid (0.166 g, 87%). <sup>1</sup>H NMR (500 MHz, CDCl<sub>3</sub>) δ 7.79–7.73 (m, 1H), 7.73–7.69 (m, 1H), 7.49–7.40 (m, 1H), 7.35–7.29 (m, 1H), 5.99 (d, *J* = 5.9 Hz, 2H), 3.78 (d, *J* = 1.6 Hz, 2H), 3.62 (m, 9H). <sup>13</sup>C{<sup>1</sup>H} NMR (126 MHz, CDCl<sub>3</sub>) δ 153.4, 144.8, 142.4, 140.7, 140.2, 138.3, 131.8, 130.4, 129.9, 129.5, 125.1, 124.5, 121.7, 120.7, 120.0 (t, *J* = 251.3 Hz), 112.6, 112.1, 107.0, 106.9, 61.0, 56.1, 43.4 (dt, *J* = 30.3, 7.9 Hz). <sup>19</sup>F NMR (470 MHz, CDCl<sub>3</sub>) δ -78.61 (t, *J* = 12.6 Hz, 2F). MP 87–90 °C. HRMS (APCI)<sup>+</sup> *m/z*: [M + H]<sup>+</sup> calc'd for C<sub>18</sub>H<sub>18</sub>ClF<sub>2</sub>N<sub>2</sub>O<sub>3</sub><sup>+</sup> 383.0969, found 383.0977. The N-regiochemical assignment for the major product is inferred based on structural data for similar examples **11ab** and **ad**.

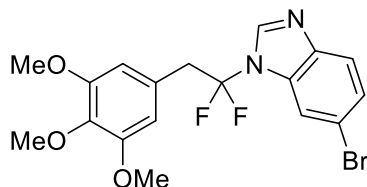

N1:N3 = (1.4:1)

**6- and 5-bromo-1-(1,1-difluoro-2-(3,4,5-trimethoxyphenyl)ethyl)-1H-benzo[d]imidazole (11ad):** Following general procedure C, *gem*-difluoroalkene **10a** (0.115 g, 0.500 mmol) was reacted with 5-bromo-1H-benzo[d]imidazole (0.118 g, 0.600 mmol) in the presence of 1,2-diphenyldisilane (7.8 mg, 0.025 mmol) and [5,5'-bis(trifluoromethyl)-2,2'-bipyridine-N1,N1']bis[3,5-difluoro-2-[5-(trifluoromethyl)-2-pyridinyl-N]phenyl-C]iridium(III) hexafluorophosphate (28.6 mg, 0.0250 mmol) in dry DCE (2.0 mL) using a 40 W 427 nm LED cooled by a fan for 24 h. The reaction produced a mixture of the two N-regioisomers of desired product **11ad** (N<sub>1</sub>:N<sub>3</sub> = 1.2:1), as determined by <sup>19</sup>F NMR analysis of the crude reaction mixture. The material was isolated according to the general procedure and purified by normal-phase flash chromatography using EtOAc and hexanes (0→40% EtOAc) to furnish a mixture of the two N-regioisomers of desired product **11ad** (N<sub>1</sub>:N<sub>3</sub> = 1.4:1) as a yellow solid (0.191 g, 89%). NMR data are reported for the separated minor regioisomer. Melting point and HRMS data were obtained from the mixture of regioisomers. <sup>1</sup>H NMR (500 MHz, CDCl<sub>3</sub>) δ 7.95 (d, *J* = 1.8 Hz, 1H), 7.71 (s, 1H), 7.46 (dd, *J* = 8.7, 1.9 Hz, 1H), 7.39–7.34 (m, 1H), 5.98 (s, 2H), 3.79 (s, 3H), 3.62 (s, 6H), 3.58 (t, *J* = 12.4 Hz, 2H). <sup>13</sup>C{<sup>1</sup>H} NMR (126 MHz, CDCl<sub>3</sub>) δ 153.4, 145.2, 140.5, 138.2, 130.3, 127.7, 125.0, 123.7, 120.0 (t, *J* = 258.6 Hz), 116.8, 113.1, 106.9, 61.0, 56.1, 43.3 (t, *J* = 12.9 Hz). <sup>19</sup>F NMR (470 MHz, CDCl<sub>3</sub>) δ -78.57 (t, *J* = 12.9 Hz, 2F). MP 78–82 °C. HRMS (APCI)<sup>+</sup> *m/z*: [M + H]<sup>+</sup> calc'd for C<sub>18</sub>H<sub>18</sub>BrF<sub>2</sub>N<sub>2</sub>O<sub>3</sub><sup>+</sup> 427.0463, found 427.0470. The N-regiochemical assignment for the major product was made using <sup>1</sup>H{<sup>19</sup>F} NOE (see S78).

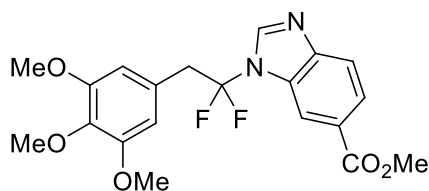

N1:N3 = (1.1:1)

**Methyl 1-(1,1-difluoro-2-(3,4,5-trimethoxyphenyl)ethyl)-1H-benzo[d]imidazole-6- and -5-carboxylate (11ae):** Following general procedure C, *gem*-difluoroalkene **10a** (0.115 g, 0.500 mmol) was reacted with methyl 1H-benzo[d]imidazole-5-carboxylate (0.132 g, 0.600 mmol) in the presence of 1,2-diphenyldisilane (7.8 mg, 0.025 mmol) and [5,5'-bis(trifluoromethyl)-2,2'-bipyridine-*N*1,*N*1']bis[3,5-difluoro-2-[5-(trifluoromethyl)-2-pyridinyl-*N*]phenyl-*C*]iridium(III) hexafluorophosphate (28.6 mg, 0.0250 mmol) in dry DCE (2.0 mL) using a 40 W 427 nm LED cooled by a fan for 24 h. The reaction produced a mixture of the two N-regioisomers of desired product **11ae** (N1:N3 = 1.2:1), as determined by  $^{19}\text{F}$  NMR analysis of the crude reaction mixture. The material was isolated according to the general procedure and purified by reversed-phase flash chromatography using 0.1% AcOH in  $\text{H}_2\text{O}$  and MeCN (0→100% MeCN) to furnish a mixture of the two N-regioisomers of desired product **11ae** (N1:N3 = 1.1:1) as a colorless oil (0.185 g, 91%).  $^1\text{H}$  NMR (500 MHz,  $\text{CDCl}_3$ )  $\delta$  8.01–7.66 (m, 1H), 7.58–7.49 (m, 1H), 7.31–6.97 (m, 2H), 5.44 (s, 2H), 3.43 (t,  $J$  = 3.3 Hz, 3H), 3.23 (dd,  $J$  = 22.8, 12.6 Hz, 3H), 3.14–3.08 (m, 2H), 3.06 (d,  $J$  = 3.0 Hz, 6H).  $^{13}\text{C}\{^1\text{H}\}$  NMR (126 MHz,  $\text{CDCl}_3$ )  $\delta$  167.1, 167.0, 153.4, 147.2, 143.7, 142.0, 141.0, 138.3, 134.4, 131.1, 126.5, 126.1, 126.0, 125.1, 125.0, 123.1, 120.6, 120.2 (dt,  $J$  = 256.1, 3.4 Hz), 114.0, 111.6, 106.9, 106.8, 61.0, 60.9, 56.1, 56.0, 52.5, 52.4, 43.4 (dt,  $J$  = 30.1, 11.7 Hz).  $^{19}\text{F}$  NMR (470 MHz,  $\text{CDCl}_3$ )  $\delta$  -78.41 (t,  $J$  = 12.3 Hz, 2F), -78.56 (t,  $J$  = 12.8 Hz, 2F). HRMS (APCI) $^+$   $m/z$ :  $[\text{M} + \text{H}]^+$  calc'd for  $\text{C}_{20}\text{H}_{21}\text{F}_2\text{N}_2\text{O}_5^+$  407.1413, found 407.1421. The N-regiochemical assignment for the major product is inferred based on structural data for similar examples **11ab** and **ad**.

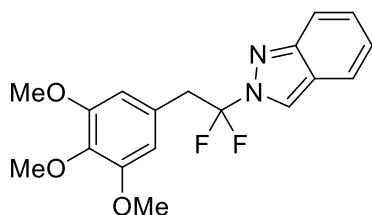

**2-(1,1-difluoro-2-(3,4,5-trimethoxyphenyl)ethyl)-2H-indazole (11af):** Following general procedure C, *gem*-difluoroalkene **10a** (0.115 g, 0.500 mmol) was reacted with 1H-indazole (0.071 g, 0.60 mmol) in the presence of 1,2-diphenyldisilane (7.8 mg, 0.025 mmol) and [5,5'-bis(trifluoromethyl)-2,2'-bipyridine-*N*1,*N*1']bis[3,5-difluoro-2-[5-(trifluoromethyl)-2-pyridinyl-*N*]phenyl-*C*]iridium(III) hexafluorophosphate (28.6 mg, 0.0250 mmol) in dry DCE (2.0 mL) using a 40 W 427 nm LED cooled by a fan for 24 h. The reaction produced a mixture of the two N-regioisomers of desired product **11af** (N2:N1 = >20:1), as determined by  $^{19}\text{F}$  NMR analysis of the crude reaction mixture. The material was isolated according to the general procedure and purified by normal-phase flash chromatography using EtOAc and hexanes (0→40% EtOAc) to furnish the desired product **11af** as a colorless solid (0.156 g, 90%).  $^1\text{H}$  NMR (500 MHz,  $\text{CDCl}_3$ )  $\delta$  8.09 (s, 1H), 7.77 (dd,  $J$  = 9.0, 1.0 Hz, 1H), 7.61 (dd,  $J$  = 8.6, 1.3 Hz, 1H), 7.38–7.31 (m, 1H), 7.16–7.06 (m, 1H), 6.18 (s, 2H), 3.88 (t,  $J$  = 13.3 Hz, 2H), 3.76 (s, 3H), 3.56 (s, 6H).  $^{13}\text{C}\{^1\text{H}\}$  NMR (126 MHz,  $\text{CDCl}_3$ )  $\delta$  153.0, 149.7, 137.5, 128.0, 126.1, 123.1, 121.8, 121.2 (t,  $J$  = 258.4 Hz), 121.0, 120.8, 118.0, 107.0, 60.7, 55.7, 42.6 (t,  $J$  = 27.7 Hz).  $^{19}\text{F}$  NMR (470 MHz,  $\text{CDCl}_3$ )  $\delta$  -81.17 (t,  $J$  = 13.4 Hz, 2F). MP 85–87 °C. HRMS (APCI) $^+$   $m/z$ :  $[\text{M} + \text{H}]^+$  calc'd for  $\text{C}_{18}\text{H}_{19}\text{F}_2\text{N}_2\text{O}_3^+$  349.1358, found 349.1365. The N2-regiochemical assignment for the major product was made using  $^1\text{H}\{^{19}\text{F}\}$  NOE (see S85) and X-ray crystallography (CCDC 2414405).

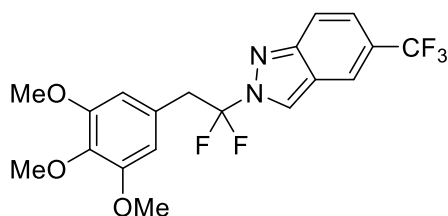

**2-(1,1-difluoro-2-(3,4,5-trimethoxyphenyl)ethyl)-5-(trifluoromethyl)-2H-indazole (11ag):** Following general procedure C, *gem*-difluoroalkene **10a** (0.115 g, 0.500 mmol) was reacted with 5-(trifluoromethyl)-1*H*-indazole (0.112 g, 0.600 mmol) in the presence of 1,2-diphenyldisilane (7.8 mg, 0.025 mmol) and [5,5'-bis(trifluoromethyl)-2,2'-bipyridine-*N*1,*N*1']bis[3,5-difluoro-2-[5-(trifluoromethyl)-2-pyridinyl-*N*]phenyl-*C*]iridium(III) hexafluorophosphate (28.6 mg, 0.0250 mmol) in dry DCE (2.0 mL) using a 40 W 427 nm LED cooled by a fan for 24 h. The reaction produced a mixture of the two *N*-regioisomers of desired product **11ag** (*N*2:*N*1 = >20:1), as determined by  $^{19}\text{F}$  NMR analysis of the crude reaction mixture. The material was isolated according to the general procedure and purified by reversed-phase flash chromatography using 0.1% AcOH in  $\text{H}_2\text{O}$  and MeCN (0→100% MeCN) to furnish desired product **11ag** as a yellow oil (0.127 g, 61%).  $^1\text{H}$  NMR (500 MHz,  $\text{CDCl}_3$ )  $\delta$  8.24 (s, 1H), 7.99 (s, 1H), 7.88 (d,  $J$  = 9.2 Hz, 1H), 7.51 (d,  $J$  = 9.2 Hz, 1H), 6.20 (s, 2H), 3.88 (t,  $J$  = 13.6 Hz, 2H), 3.77 (s, 3H), 3.59 (s, 6H).  $^{13}\text{C}\{^1\text{H}\}$  NMR (126 MHz,  $\text{CDCl}_3$ )  $\delta$  153.2, 149.9, 137.8, 129.3, 127.6, 125.7, 125.5, 123.9, 123.3, 122.9, 120.2 (q,  $J$  = 13.1 Hz), 119.8 (t,  $J$  = 258.7 Hz), 119.5, 107.1, 60.9, 55.9, 42.6 (t,  $J$  = 36.4 Hz).  $^{19}\text{F}$  NMR (470 MHz,  $\text{CDCl}_3$ )  $\delta$  -62.97 (s, 3F), -81.32 (t,  $J$  = 13.7 Hz, 2F). HRMS (APCI) $^+$   $m/z$ : [ $M + H$ ] $^+$  calc'd for  $\text{C}_{19}\text{H}_{18}\text{F}_5\text{N}_2\text{O}_3$  $^+$  417.1232, found 417.1236. The *N*1-regiochemical assignment for the major product was made using  $^1\text{H}\{^{19}\text{F}\}$  NOE (see S89).

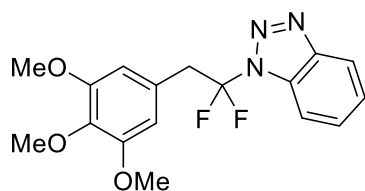

**1-(1,1-difluoro-2-(3,4,5-trimethoxyphenyl)ethyl)-1H-benzo[d][1,2,3]triazole (11ah):** Following general procedure C, *gem*-difluoroalkene **10a** (0.115 g, 0.500 mmol) was reacted with 1*H*-benzo[d][1,2,3]triazole (0.072 g, 0.60 mmol) in the presence of 1,2-diphenyldisilane (7.8 mg, 0.025 mmol) and [5,5'-bis(trifluoromethyl)-2,2'-bipyridine-*N*1,*N*1']bis[3,5-difluoro-2-[5-(trifluoromethyl)-2-pyridinyl-*N*]phenyl-*C*]iridium(III) hexafluorophosphate (28.6 mg, 0.0250 mmol) in dry DCE (2.0 mL) using a 40 W 427 nm LED cooled by a fan for 24 h. The material was isolated according to the general procedure and purified by normal-phase flash chromatography using EtOAc and hexanes (0→40% EtOAc) to furnish the desired product **11ah** as a colorless solid (0.168 g, 96%).  $^1\text{H}$  NMR (500 MHz,  $\text{CDCl}_3$ )  $\delta$  8.09 (d,  $J$  = 8.4 Hz, 1H), 7.68 (d,  $J$  = 8.4 Hz, 1H), 7.53 (t,  $J$  = 7.7 Hz, 1H), 7.43 (t,  $J$  = 7.7 Hz, 1H), 6.52 (s, 2H), 4.11 (t,  $J$  = 14.3 Hz, 2H), 3.78 (s, 9H).  $^{13}\text{C}\{^1\text{H}\}$  NMR (126 MHz,  $\text{CDCl}_3$ )  $\delta$  153.2, 146.1, 137.9, 131.6, 129.3, 125.8, 125.3, 121.1 (t,  $J$  = 254.7 Hz), 120.2, 111.7, 108.0, 60.9, 56.2, 42.2 (t,  $J$  = 25.6 Hz).  $^{19}\text{F}$  NMR (470 MHz,  $\text{CDCl}_3$ )  $\delta$  -78.99 (t,  $J$  = 14.7 Hz, 2F). MP 150–154 °C. HRMS (APCI) $^+$   $m/z$ : [ $M + H$ ] $^+$  calc'd for  $\text{C}_{17}\text{H}_{18}\text{F}_2\text{N}_2\text{O}_3$  $^+$  350.1311, found 350.1317. The *N*1-regiochemical assignment for the major product was made using X-ray crystallography (CCDC 2414406).

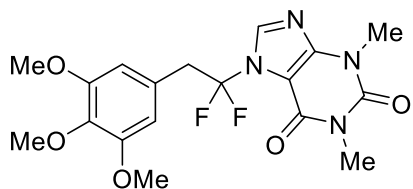

**7-(1,1-difluoro-2-(3,4,5-trimethoxyphenyl)ethyl)-1,3-dimethyl-3,7-dihydro-1H-purine-2,6-dione (11ai):**

Following general procedure C, *gem*-difluoroalkene **10a** (0.115 g, 0.500 mmol) was reacted with 1,3-dimethyl-3,7-dihydro-1H-purine-2,6-dione (theophylline, 0.108 g, 0.600 mmol) in the presence of 1,2-diphenyldisilane (7.8 mg, 0.025 mmol) and [5,5'-bis(trifluoromethyl)-2,2'-bipyridine-*N*1,*N*1']bis[3,5-difluoro-2-[5-(trifluoromethyl)-2-pyridinyl-*N*]phenyl-C]iridium(III) hexafluorophosphate (28.6 mg, 0.0250 mmol) in dry DCE (2.0 mL) using a 40 W 427 nm LED cooled by a fan for 24 h. The material was isolated according to the general procedure and purified by reversed-phase flash chromatography using 0.1% AcOH in H<sub>2</sub>O and MeCN (0→100% MeCN) to furnish desired product **11ai** as a colorless oil (0.088 g, 43%). <sup>1</sup>H NMR (500 MHz, CDCl<sub>3</sub>) δ 7.69 (s, 1H), 6.32 (s, 2H), 3.94 (t, *J* = 14.6 Hz, 2H), 3.81 (s, 3H), 3.76 (s, 6H), 3.60 (s, 3H), 3.49 (s, 3H). <sup>13</sup>C{<sup>1</sup>H} NMR (126 MHz, CDCl<sub>3</sub>) δ 154.1, 153.4, 151.4, 150.5, 139.1, 138.1, 125.9, 119.6 (t, *J* = 261.3 Hz), 107.3, 105.3, 61.0, 56.3, 43.0 (t, *J* = 27.1 Hz), 30.3, 28.8. <sup>19</sup>F NMR (470 MHz, CDCl<sub>3</sub>) δ -77.75 (t, *J* = 15.1 Hz, 2F). HRMS (APCI)<sup>+</sup> *m/z*: [M + H]<sup>+</sup> calc'd for C<sub>18</sub>H<sub>21</sub>F<sub>2</sub>N<sub>4</sub>O<sub>5</sub><sup>+</sup> 411.1475, found 411.1479. The N-regiochemical assignment for the major product was made using <sup>1</sup>H{<sup>19</sup>F} NOE (see S96).

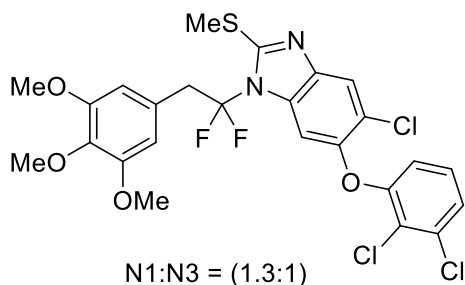

**5-chloro-6-(2,3-dichlorophenoxy)-1-(1,1-difluoro-2-(3,4,5-trimethoxyphenyl)ethyl)-2-(methylthio)-1H-benzo[d]imidazole (11aj):**

Following general procedure C, *gem*-difluoroalkene **10a** (0.115 g, 0.500 mmol) was reacted with 5-chloro-6-(2,3-dichlorophenoxy)-2-(methylthio)-1H-benzimidazole (triclabendazole, 0.198 g, 0.600 mmol) in the presence of 1,2-diphenyldisilane (7.8 mg, 0.025 mmol) and [5,5'-bis(trifluoromethyl)-2,2'-bipyridine-*N*1,*N*1']bis[3,5-difluoro-2-[5-(trifluoromethyl)-2-pyridinyl-*N*]phenyl-C]iridium(III) hexafluorophosphate (28.6 mg, 0.0250 mmol) in dry DCE (2.0 mL) using a 40 W 427 nm LED cooled by a fan for 24 h. The reaction produced an even mixture of the two N-regioisomers of desired product **11aj** (N1:N3 = 1:1), as determined by <sup>19</sup>F NMR analysis of the crude reaction mixture. The material was isolated according to the general procedure and purified by normal-phase flash chromatography using EtOAc and hexanes (0→40% EtOAc) to furnish a mixture of the two N-regioisomers of desired product **11aj** (N1:N3 = 1.3:1) as a colorless solid (0.253 g, 86%). <sup>1</sup>H NMR (500 MHz, CDCl<sub>3</sub>) δ 7.84–7.39 (m, 1H), 7.49–7.30 (m, 1H), 7.27 (m, 1H), 7.20–6.84 (m, 1H), 6.62 (ddd, *J* = 167.6, 8.3, 1.4 Hz, 1H), 6.19 (d, *J* = 23.7 Hz, 2H), 4.07–3.89 (m, 3H), 3.83–3.65 (m, 8H), 2.86 (d, *J* = 30.3 Hz, 3H). <sup>13</sup>C{<sup>1</sup>H} NMR (126 MHz, CDCl<sub>3</sub>) δ 185.7, 154.9, 154.4, 154.3, 154.1, 153.4, 153.3, 147.9, 146.5, 142.4, 140.8, 138.3, 134.5, 134.3, 134.2, 132.1, 127.8, 127.7, 125.4, 125.1, 124.4, 122.2, 121.4, 120.8, 119.6, 116.8, 114.4, 113.3, 109.1, 107.5, 107.2, 105.6, 61.1, 61.0, 56.2, 56.1, 43.1–41.8 (m), 15.3, 15.2. <sup>19</sup>F NMR (470 MHz, CDCl<sub>3</sub>) δ -75.42 (dt, *J* = 40.5, 12.5 Hz, 2F). MP 57–63 °C. HRMS (APCI)<sup>+</sup> *m/z*: [M + H]<sup>+</sup> calc'd for C<sub>25</sub>H<sub>22</sub>Cl<sub>3</sub>F<sub>2</sub>N<sub>2</sub>O<sub>4</sub>S<sup>+</sup> 589.0328, found 589.0340.

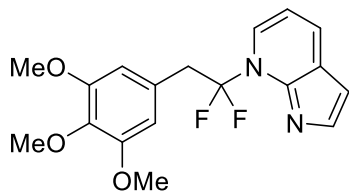

**7-(1,1-difluoro-2-(3,4,5-trimethoxyphenyl)ethyl)-7H-pyrrolo[2,3-b]pyridine (11ak):** With modification to general procedure C, *gem*-difluoroalkene **10a** (0.115 g, 0.500 mmol) was reacted with 1*H*-pyrrolo[2,3-*b*]pyridine (0.089 g, 0.75 mmol) in the presence of 1,2-diphenyldisilane (23.4 mg, 0.0750 mmol) and [5,5'-bis(trifluoromethyl)-2,2'-bipyridine-*N*1,*N*1']bis[3,5-difluoro-2-[5-(trifluoromethyl)-2-pyridinyl]-*N*]phenyl-C]iridium(III) hexafluorophosphate (5.7 mg, 0.0050 mmol) in dry DCE (2.0 mL) in a 20 mL scintillation vial using a 40 W 427 nm LED cooled by a fan for 46 h. The material was isolated according to the general procedure and purified by normal-phase flash chromatography using EtOAc and hexanes (0→75% EtOAc) to furnish desired product **11ak** as a bright yellow oil (0.024 g, 14%). <sup>1</sup>H NMR (800 MHz, CDCl<sub>3</sub>) δ 8.11 (d, *J* = 7.2 Hz, 1H), 7.97 (d, *J* = 2.6 Hz, 1H), 7.54 (d, *J* = 6.6 Hz, 1H), 6.72 (d, *J* = 2.6 Hz, 1H), 6.70 (t, *J* = 6.9 Hz, 1H), 5.94 (s, 2H), 4.32 (t, *J* = 13.9 Hz, 2H), 3.72 (s, 3H), 3.53 (s, 6H). <sup>13</sup>C{<sup>1</sup>H} NMR (201 MHz, CDCl<sub>3</sub>) δ 153.1, 146.2, 146.0, 137.7, 132.7, 132.6, 126.2 (t, *J* = 4.4 Hz), 123.9 (t, *J* = 9.0 Hz), 121.8 (t, *J* = 266.7 Hz), 108.1, 106.7, 102.0, 60.9, 55.9, 40.6 (t, *J* = 25.9 Hz). <sup>19</sup>F NMR (282 MHz, CDCl<sub>3</sub>) δ -82.48 (t, *J* = 13.9 Hz, 2F). HRMS (ESI)<sup>+</sup> *m/z*: [M + H]<sup>+</sup> calc'd for C<sub>18</sub>H<sub>19</sub>F<sub>2</sub>N<sub>2</sub>O<sub>3</sub><sup>+</sup> 349.1358, found 349.1389. The N-regiochemistry was assumed to be the same for **11ak** as for **11al** (see below).

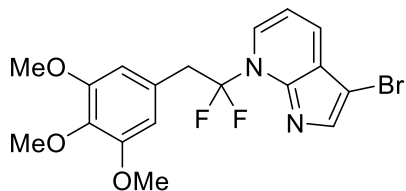

**3-bromo-7-(1,1-difluoro-2-(3,4,5-trimethoxyphenyl)ethyl)-7H-pyrrolo[2,3-b]pyridine (11al):** With modification to general procedure D, *gem*-difluoroalkene **10a** (0.115 g, 0.500 mmol) was reacted with 3-bromo-1*H*-pyrrolo[2,3-*b*]pyridine (0.118 g, 0.600 mmol) in the presence of 1,2-diphenyldisilane (39.0 mg, 0.125 mmol) and 9-mesityl-3,6-di-*tert*-butyl-10-phenylacridinium tetrafluoroborate (8.6 mg, 0.015 mmol) in dry PhMe (2.0 mL) in a 20 mL scintillation vial using a 40 W 427 nm LED cooled by a fan for 44 h. The material was isolated according to the general procedure and purified by normal-phase flash chromatography using EtOAc and hexanes (0→25% EtOAc) to furnish a mixture of desired product **11al** and 3-bromo-1*H*-pyrrolo[2,3-*b*]pyridine. This mixture was further purified by crystallization. Specifically, the mixture was dissolved in a solution of hexanes and EtOAc (7.5 mL, 60% EtOAc) at 67 °C and then left to cool to rt for 2 h. The mixture was then cooled to ~0 °C and let sit for 14 h to ensure complete crystallization. Then, the liquor was removed and the remaining crystals were washed with a cold solution of pentane and EtOAc (0 °C, 10 x 3 mL, 50% EtOAc). Solvent was removed *in vacuo* to furnish dry, needle-like, bright yellow crystals of product **11al** (0.041 g, 19%). <sup>1</sup>H NMR (800 MHz, CDCl<sub>3</sub>) δ 8.11 (d, *J* = 7.3 Hz, 1H), 7.90 (s, 1H), 7.63 (d, *J* = 6.7 Hz, 1H), 6.82 (t, *J* = 7.0 Hz, 1H), 5.95 (s, 2H), 4.28 (t, *J* = 14.0 Hz, 2H), 3.73 (s, 3H), 3.56 (s, 6H). <sup>13</sup>C{<sup>1</sup>H} NMR (201 MHz, CDCl<sub>3</sub>) δ 153.2, 145.0, 144.2, 137.9, 132.9, 130.6, 125.7, 125.5, 121.8 (t, *J* = 268.2 Hz), 108.8, 106.7, 89.0, 60.9, 56.0, 40.8 (t, *J* = 25.5 Hz). <sup>19</sup>F NMR (282 MHz, CDCl<sub>3</sub>) δ -82.49 (t, *J* = 14.0 Hz, 2F). MP 179–180 °C. HRMS (ESI)<sup>+</sup> *m/z*: [M + H]<sup>+</sup> calc'd for C<sub>18</sub>H<sub>18</sub>BrF<sub>2</sub>N<sub>2</sub>O<sub>3</sub><sup>+</sup> 427.0463, found 427.0427. The N-regiochemical assignment was made using X-ray crystallography (CCDC 2492669).



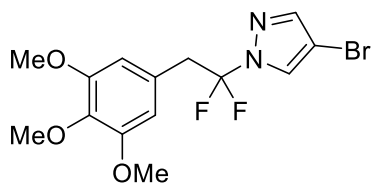

**4-bromo-1-(1,1-difluoro-2-(3,4,5-trimethoxyphenyl)ethyl)-1H-pyrazole (11am):** Following general procedure C, *gem*-difluoroalkene **10a** (0.115 g, 0.500 mmol) was reacted with 4-bromo-1H-pyrazole (0.088 g, 0.60 mmol) in the presence of 1,2-diphenyldisilane (7.8 mg, 0.025 mmol) and [5,5'-bis(trifluoromethyl)-2,2'-bipyridine-*N*1,*N*1']bis[3,5-difluoro-2-[5-(trifluoromethyl)-2-pyridinyl-*N*]phenyl-C]iridium(III) hexafluorophosphate (28.6 mg, 0.0250 mmol) in dry DCE (2.0 mL) using a 40 W 427 nm LED cooled by a fan for 24 h. The material was isolated according to the general procedure and purified by normal-phase flash chromatography using EtOAc and hexanes (0→20% EtOAc) to furnish the desired product **11am** as a colorless oil (0.175 g, 93%). <sup>1</sup>H NMR (500 MHz, CDCl<sub>3</sub>) δ 7.66 (s, 2H), 6.32 (s, 2H), 3.81 (s, 3H), 3.77 (s, 6H), 3.73 (t, *J* = 13.5 Hz, 2H). <sup>13</sup>C{<sup>1</sup>H} NMR (126 MHz, CDCl<sub>3</sub>) δ 153.2, 142.3, 137.8, 129.3, 128.1, 126.1, 119.8 (t, *J* = 255.8 Hz), 107.4, 95.7, 60.9, 56.1, 41.6 (t, *J* = 27.3 Hz). <sup>19</sup>F NMR (470 MHz, CDCl<sub>3</sub>) δ -79.52 (t, *J* = 13.2 Hz, 2F). HRMS (APCI)<sup>+</sup> *m/z*: [M + H]<sup>+</sup> calc'd for C<sub>14</sub>H<sub>16</sub>BrF<sub>2</sub>N<sub>2</sub>O<sub>3</sub><sup>+</sup> 377.0307, found 377.0319.

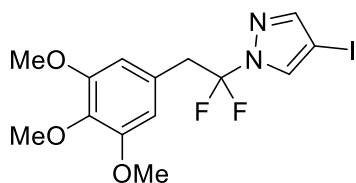

**1-(1,1-difluoro-2-(3,4,5-trimethoxyphenyl)ethyl)-4-iodo-1H-pyrazole (11an):** Following general procedure C, *gem*-difluoroalkene **10a** (0.115 g, 0.500 mmol) was reacted with 4-iodo-1H-pyrazole (0.116 g, 0.600 mmol) in the presence of 1,2-diphenyldisilane (7.8 mg, 0.025 mmol) and [5,5'-bis(trifluoromethyl)-2,2'-bipyridine-*N*1,*N*1']bis[3,5-difluoro-2-[5-(trifluoromethyl)-2-pyridinyl-*N*]phenyl-C]iridium(III) hexafluorophosphate (28.6 mg, 0.0250 mmol), and N<sub>2</sub>-sparged H<sub>2</sub>O (4.5 μL, 0.25 mmol) in DCE (2.0 mL) using a 40 W 427 nm LED cooled by a fan for 24 h. The material was isolated according to the general procedure and purified by normal-phase flash chromatography using EtOAc and hexanes (0→20% EtOAc) to furnish a mixture of desired product **11an** and two reaction side products [ArCH=CFN(Azole), ArCH<sub>2</sub>CF<sub>2</sub>N(Azole)]. This mixture was further purified by crystallization. Specifically, the mixture was dissolved in pentane (3 mL) at 39 °C and then left to cool to rt. Desired product crystallized over the course of 16 h. Then, the liquor was removed from the mixture and the remaining precipitate was washed with cold pentane (0 °C, 5 x 3 mL). This crystallization process was repeated for the liquor (2x) using crystals from the original batch as seed crystals. The solids from all three crystallizations were combined, and after removing residual pentane *in vacuo*, product **11an** was obtained as a colorless solid (0.171 g, 81%). <sup>1</sup>H NMR (500 MHz, CDCl<sub>3</sub>) δ 7.71–7.70 (m, 1H), 7.70 (d, *J* = 0.9 Hz, 1H), 6.31 (s, 2H), 3.82 (s, 3H), 3.78–3.72 (m, 8H). <sup>13</sup>C{<sup>1</sup>H} NMR (126 MHz, CDCl<sub>3</sub>) δ 153i.2, 146.6, 137.8, 132.4, 126.1, 119.6 (t, *J* = 255.9 Hz), 107.4, 60.9, 59.0, 56.2, 41.7 (t, *J* = 27.4 Hz). <sup>19</sup>F NMR (470 MHz, CDCl<sub>3</sub>) δ -79.63 (t, *J* = 14.0 Hz, 2F). MP 55–57 °C. HRMS (APCI)<sup>+</sup> *m/z*: [M + H]<sup>+</sup> calc'd for C<sub>14</sub>H<sub>16</sub>F<sub>2</sub>IN<sub>2</sub>O<sub>3</sub><sup>+</sup> 425.0168, found 425.0176.

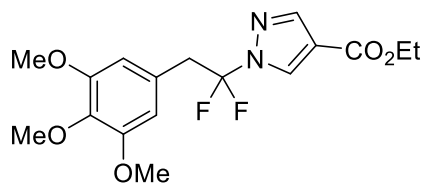

**Ethyl 1-(1,1-difluoro-2-(3,4,5-trimethoxyphenyl)ethyl)-1H-pyrazole-4-carboxylate (11ao):** Following general procedure C, *gem*-difluoroalkene **10a** (0.115 g, 0.500 mmol) was reacted with ethyl 1H-pyrazole-4-carboxylate (0.084 g, 0.60 mmol) in the presence of 1,2-diphenyldisilane (7.8 mg, 0.025 mmol) and [5,5'-bis(trifluoromethyl)-2,2'-bipyridine-*N*1,*N*1']bis[3,5-difluoro-2-[5-(trifluoromethyl)-2-pyridinyl-*N*]phenyl-*C*]iridium(III) hexafluorophosphate (28.6 mg, 0.0250 mmol), and N<sub>2</sub>-sparged H<sub>2</sub>O (4.5  $\mu$ L, 0.25 mmol) in DCE (2.0 mL) using a 40 W 427 nm LED cooled by a fan for 24 h. The material was isolated according to the general procedure and purified by normal-phase flash chromatography using EtOAc and hexanes (0 $\rightarrow$ 20% EtOAc) to furnish desired product **11ao** as a colorless solid (0.167 g, 90%). <sup>1</sup>H NMR (500 MHz, CDCl<sub>3</sub>)  $\delta$  8.11 (s, 1H), 8.09 (t, *J* = 1.67 Hz, 1H), 6.34 (s, 2H), 4.30 (q, *J* = 7.1 Hz, 2H), 3.81 (s, 3H), 3.80–3.74 (m, 8H), 1.34 (t, *J* = 7.1 Hz, 3H). <sup>13</sup>C{<sup>1</sup>H} NMR (126 MHz, CDCl<sub>3</sub>)  $\delta$  162.2, 153.2, 142.6, 137.8, 131.3, 125.9, 119.9 (t, *J* = 252.6 Hz), 116.8, 107.4, 61.0, 60.8, 56.2, 41.8 (t, *J* = 27.2 Hz), 14.4. <sup>19</sup>F NMR (470 MHz, CDCl<sub>3</sub>)  $\delta$  -80.42 (t, *J* = 13.7 Hz, 2F). MP 93–96 °C. HRMS (APCI)<sup>+</sup> *m/z*: [M + H]<sup>+</sup> calc'd for C<sub>17</sub>H<sub>21</sub>F<sub>2</sub>N<sub>2</sub>O<sub>5</sub><sup>+</sup> 371.1413, found 371.1422.

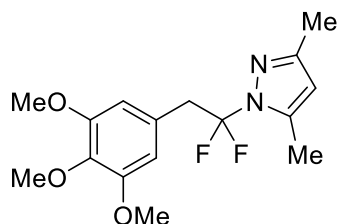

**1-(1,1-difluoro-2-(3,4,5-trimethoxyphenyl)ethyl)-3,5-dimethyl-1H-pyrazole (11ap):** Following general procedure C, *gem*-difluoroalkene **10a** (0.115 g, 0.500 mmol) was reacted with 3,5-dimethyl-1H-pyrazole (0.058 g, 0.60 mmol) in the presence of 1,2-diphenyldisilane (7.8 mg, 0.025 mmol) and [5,5'-bis(trifluoromethyl)-2,2'-bipyridine-*N*1,*N*1']bis[3,5-difluoro-2-[5-(trifluoromethyl)-2-pyridinyl-*N*]phenyl-*C*]iridium(III) hexafluorophosphate (28.6 mg, 0.0250 mmol) in dry DCE (2.0 mL) using a 40 W 427 nm LED cooled by a fan for 24 h. The material was isolated according to the general procedure and purified by normal-phase flash chromatography using EtOAc and hexanes (0 $\rightarrow$ 40% EtOAc) to furnish the desired product **11ap** as a colorless oil (0.148 g, 91%). <sup>1</sup>H NMR (500 MHz, CDCl<sub>3</sub>)  $\delta$  6.48 (s, 2H), 5.86 (s, 1H), 3.82 (s, 3H), 3.82–3.75 (m, 8H), 2.24 (s, 3H), 2.22 (t, *J* = 1.1 Hz, 3H). <sup>13</sup>C{<sup>1</sup>H} NMR (126 MHz, CDCl<sub>3</sub>)  $\delta$  153.0, 149.6, 141.8, 137.5, 127.3, 121.0 (t, *J* = 250.7 Hz), 109.0, 107.9, 60.9, 56.1, 42.3 (t, *J* = 26.9 Hz), 13.6, 12.2 (t, *J* = 4.6 Hz). <sup>19</sup>F NMR (470 MHz, CDCl<sub>3</sub>)  $\delta$  -76.85 (t, *J* = 14.7 Hz, 2F). HRMS (APCI)<sup>+</sup> *m/z*: [M + H]<sup>+</sup> calc'd for C<sub>16</sub>H<sub>21</sub>F<sub>2</sub>N<sub>2</sub>O<sub>3</sub><sup>+</sup> 327.1515, found 327.1523.

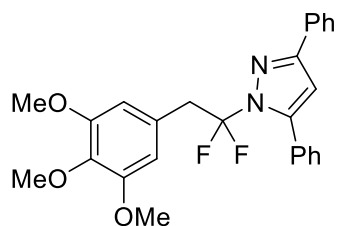

**1-(1,1-Difluoro-2-(3,4,5-trimethoxyphenyl)ethyl)-3,5-diphenyl-1H-pyrazole (11aq):** Following general procedure C, *gem*-difluoroalkene **10a** (0.115 g, 0.500 mmol) was reacted with 3,5-diphenyl-1H-pyrazole (0.132 g, 0.600 mmol) in the presence of 1,2-diphenyldisilane (7.8 mg, 0.025 mmol) and [5,5'-bis(trifluoromethyl)-2,2'-bipyridine-*N*1,*N*1']bis[3,5-difluoro-2-[5-(trifluoromethyl)-2-pyridinyl-*N*]phenyl-*C*]iridium(III) hexafluorophosphate (28.6 mg, 0.0250 mmol) in dry DCE (2.0 mL) using a 40 W 427 nm LED cooled by a fan for 24 h. The material was isolated according to the general procedure and purified by reversed-phase flash

chromatography using 0.1% AcOH in H<sub>2</sub>O and MeCN (0→100% MeCN) to furnish desired product **11aq** as a yellow oil (0.195 g, 89%). <sup>1</sup>H NMR (500 MHz, CDCl<sub>3</sub>) δ 7.90 (dt, *J* = 6.7, 1.4 Hz, 2H), 7.48–7.43 (m, 2H), 7.41–7.34 (m, 4H), 7.31–7.27 (m, 2H), 6.61 (s, 1H), 6.46 (s, 2H), 3.92 (t, *J* = 14.0 Hz, 2H), 3.82 (s, 3H), 3.72 (s, 6H). <sup>13</sup>C{<sup>1</sup>H} NMR (126 MHz, CDCl<sub>3</sub>) δ 153.1, 151.9, 146.4, 137.6, 132.4, 130.6, 129.4, 128.9, 128.9, 128.7, 128.0, 127.1, 126.0, 121.3 (t, *J* = 254.1 Hz), 107.9, 107.5, 60.9, 56.1, 42.8 (t, *J* = 27.0 Hz). <sup>19</sup>F NMR (470 MHz, CDCl<sub>3</sub>) δ -73.35 (t, *J* = 14.3 Hz, 2F). HRMS (APCI)<sup>+</sup> *m/z*: [M + H]<sup>+</sup> calc'd for C<sub>26</sub>H<sub>25</sub>F<sub>2</sub>N<sub>2</sub>O<sub>3</sub><sup>+</sup> 451.1828, found 451.1835.

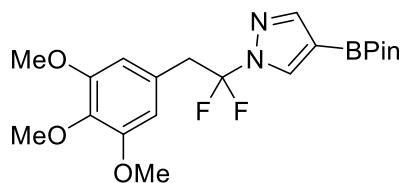

**1-(1,1-difluoro-2-(3,4,5-trimethoxyphenyl)ethyl)-4-(4,4,5,5-tetramethyl-1,3,2-dioxaborolan-2-yl)-1H-pyrazole (11ar)**: Following general procedure C, *gem*-difluoroalkene **10a** (0.115 g, 0.500 mmol) was reacted with pyrazol-4-ylboronic acid pinacol ester (0.116 g, 0.600 mmol) in the presence of 1,2-diphenyldisilane (7.8 mg, 0.025 mmol) and [5,5'-bis(trifluoromethyl)-2,2'-bipyridine-*N*1,*N*1']bis[3,5-difluoro-2-[5-(trifluoromethyl)-2-pyridinyl-*N*]phenyl-*C*]iridium(III) hexafluorophosphate (28.6 mg, 0.0250 mmol) in dry DCE (2.0 mL) using a 40 W 427 nm LED cooled by a fan for 24 h. The material was isolated according to the general procedure and purified by normal-phase flash chromatography using EtOAc and hexanes (0→25% EtOAc) to furnish the desired product **11ar** as a light orange solid (0.191 g, 90%). <sup>1</sup>H NMR (500 MHz, CDCl<sub>3</sub>) δ 7.93 (m, 2H), 6.30 (s, 2H), 3.80 (s, 3H), 3.75 (m, 8H), 1.30 (s, 12H). <sup>13</sup>C{<sup>1</sup>H} NMR (126 MHz, CDCl<sub>3</sub>) δ 153.1, 147.1, 137.7, 135.1, 126.4, 119.9 (t, *J* = 255.2 Hz), 107.5, 83.8, 60.9, 56.2, 42.1 (t, *J* = 25.6 Hz), 24.9. <sup>19</sup>F NMR (470 MHz, CDCl<sub>3</sub>) δ -79.97 (t, *J* = 13.3 Hz, 2F). MP 88–91 °C. HRMS (APCI)<sup>+</sup> *m/z*: [M + H]<sup>+</sup> calc'd for C<sub>20</sub>H<sub>28</sub>BF<sub>2</sub>N<sub>2</sub>O<sub>5</sub><sup>+</sup> 425.2054, found 425.2063.

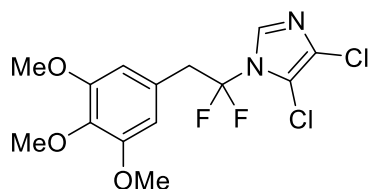

**4,5-dichloro-1-(1,1-difluoro-2-(3,4,5-trimethoxyphenyl)ethyl)-1H-imidazole (11as)**: Following general procedure C, *gem*-difluoroalkene **10a** (0.115 g, 0.500 mmol) was reacted with 4,5-dichloro-1H-imidazole (0.082 g, 0.60 mmol) in the presence of 1,2-diphenyldisilane (7.8 mg, 0.025 mmol) and [5,5'-bis(trifluoromethyl)-2,2'-bipyridine-*N*1,*N*1']bis[3,5-difluoro-2-[5-(trifluoromethyl)-2-pyridinyl-*N*]phenyl-*C*]iridium(III) hexafluorophosphate (28.6 mg, 0.0250 mmol) in dry DCE (2.0 mL) using a 40 W 427 nm LED cooled by a fan for 24 h. The material was isolated according to the general procedure and purified by normal-phase flash chromatography using EtOAc and hexanes (0→40% EtOAc) to furnish the desired product **11as** as a colorless oil (0.176 g, 96%). <sup>1</sup>H NMR (500 MHz, CDCl<sub>3</sub>) δ 7.23 (s, 1H), 6.14 (s, 2H), 3.76 (s, 3H), 3.72 (s, 6H), 3.55 (t, *J* = 13.2 Hz, 2H). <sup>13</sup>C{<sup>1</sup>H} NMR (126 MHz, CDCl<sub>3</sub>) δ 153.4, 138.2, 132.9, 129.5, 124.7, 119.2 (t, *J* = 261.8 Hz), 110.9, 106.7, 60.9, 56.1, 42.7 (t, *J* = 28.1 Hz). <sup>19</sup>F NMR (470 MHz, CDCl<sub>3</sub>) δ -78.25 (t, *J* = 13.1 Hz, 2F). HRMS (APCI)<sup>+</sup> *m/z*: [M + H]<sup>+</sup> calc'd for C<sub>14</sub>H<sub>15</sub>Cl<sub>2</sub>F<sub>2</sub>N<sub>2</sub>O<sub>3</sub><sup>+</sup> 367.0422, found 367.0431.

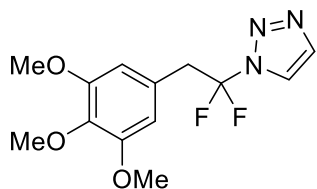

**1-(1,1-difluoro-2-(3,4,5-trimethoxyphenyl)ethyl)-1H-1,2,3-triazole (11at):** Following general procedure C, *gem*-difluoroalkene **10a** (0.115 g, 0.500 mmol) was reacted with 1H-1,2,3-triazole (0.042 g, 0.60 mmol) in the presence of 1,2-diphenyldisilane (7.8 mg, 0.025 mmol) and [5,5'-bis(trifluoromethyl)-2,2'-bipyridine-*N*1,*N*1']bis[3,5-difluoro-2-[5-(trifluoromethyl)-2-pyridinyl-*N*]phenyl-C]iridium(III) hexafluorophosphate (28.6 mg, 0.0250 mmol) in dry DCE (2.0 mL) using a 40 W 427 nm LED cooled by a fan for 24 h. The material was isolated according to the general procedure and purified by normal-phase flash chromatography using EtOAc and hexanes (0→40% EtOAc) to furnish the desired product **11at** as a colorless oil (0.139 g, 93%). <sup>1</sup>H NMR (500 MHz, CDCl<sub>3</sub>) δ 7.75 (s, 1H), 7.71 (s, 1H), 6.34 (s, 2H), 3.91 (t, *J* = 13.8 Hz, 2H), 3.78 (s, 3H), 3.75 (s, 6H). <sup>13</sup>C{<sup>1</sup>H} NMR (126 MHz, CDCl<sub>3</sub>) δ 153.2, 137.8, 133.9, 125.3, 121.9, 119.6 (t, *J* = 258.7 Hz), 107.5, 60.9, 56.2, 42.2 (t, *J* = 26.1 Hz). <sup>19</sup>F NMR (470 MHz, CDCl<sub>3</sub>) δ -78.23 (t, *J* = 13.9 Hz, 2F). HRMS (APCI)<sup>+</sup> *m/z*: [M + H]<sup>+</sup> calc'd for C<sub>13</sub>H<sub>16</sub>F<sub>2</sub>N<sub>3</sub>O<sub>3</sub><sup>+</sup> 300.1154, found 300.1159.

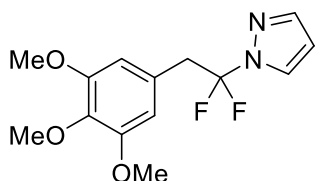

**1-(1,1-difluoro-2-(3,4,5-trimethoxyphenyl)ethyl)-1H-pyrazole (11a):** Following general procedure C, *gem*-difluoroalkene **10a** (0.115 g, 0.500 mmol) was reacted with 1H-pyrazole (0.041 g, 0.60 mmol) in the presence of 1,2-diphenyldisilane (7.8 mg, 0.025 mmol) and [5,5'-bis(trifluoromethyl)-2,2'-bipyridine-*N*1,*N*1']bis[3,5-difluoro-2-[5-(trifluoromethyl)-2-pyridinyl-*N*]phenyl-C]iridium(III) hexafluorophosphate (28.6 mg, 0.0250 mmol) in dry DCE (2.0 mL) using a 40 W 427 nm LED cooled by a fan for 14 h. The material was isolated according to the general procedure and purified by normal-phase flash chromatography using EtOAc and hexanes (0→40% EtOAc) to furnish desired product **11a** as a colorless solid (0.138 g, 92%). <sup>1</sup>H NMR (500 MHz, CDCl<sub>3</sub>) δ 7.71 (s, 1H), 7.63 (d, *J* = 2.6 Hz, 1H), 6.33 (s, 1H), 6.32 (s, 2H), 3.80 (s, 3H), 3.78 (d, *J* = 13.4 Hz, 2H), 3.75 (s, 6H). <sup>13</sup>C{<sup>1</sup>H} NMR (126 MHz, CDCl<sub>3</sub>) δ 153.1, 141.8, 137.6, 128.0, 126.6, 112.0 (t, *J* = 254.1 Hz), 107.4, 107.2, 60.9, 56.1, 42.0 (t, *J* = 28.0 Hz). <sup>19</sup>F NMR (470 MHz, CDCl<sub>3</sub>) δ -79.52 (t, *J* = 13.6 Hz, 2F). MP 64–65 °C. HRMS (ESI)<sup>+</sup> *m/z*: [M + H]<sup>+</sup> calc'd for C<sub>14</sub>H<sub>17</sub>F<sub>2</sub>N<sub>2</sub>O<sub>3</sub><sup>+</sup> 299.1202, found 299.1208.

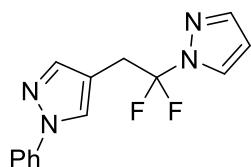

**4-(2,2-difluoro-2-(1H-pyrazol-1-yl)ethyl)-1-phenyl-1H-pyrazole (11b):** Following general procedure D, *gem*-difluoroalkene **10b** (0.103 g, 0.500 mmol) was reacted with 1H-pyrazole (0.041 g, 0.60 mmol) in the presence of 1,2-diphenyldisilane (7.8 mg, 0.025 mmol) and 9-mesityl-3,6-di-*tert*-butyl-10-phenylacridinium tetrafluoroborate (8.6 mg, 0.015 mmol) in dry PhMe (2.0 mL) using a 40 W 427 nm LED cooled by a fan for 15 h. The material was isolated according to the general procedure and purified by normal-phase flash chromatography using EtOAc and hexanes (0→25% EtOAc) to furnish desired product **11b** as a dark yellow solid (0.115 g, 84%). <sup>1</sup>H NMR (500 MHz, CDCl<sub>3</sub>) δ 7.74 (d, *J* = 2.7 Hz, 1H), 7.71 (s, 1H), 7.61 (d, *J* = 7.5 Hz, 2H), 7.52 (s, 1H), 7.42 (dd, *J* = 8.6, 7.4 Hz, 2H), 7.26 (t, *J* = 7.5 Hz, 1H), 6.36 (t, *J* = 2.1 Hz, 1H), 3.86 (t, *J* = 13.5 Hz, 2H). <sup>13</sup>C{<sup>1</sup>H} NMR (126 MHz, CDCl<sub>3</sub>) δ 142.0, 141.9, 134.0, 129.5, 127.8, 127.2, 126.7, 119.7 (t, *J* = 252.3 Hz),

119.1, 112.7 (d,  $J = 4.6$  Hz), 107.6, 31.5 (t,  $J = 29.2$  Hz).  $^{19}\text{F}$  NMR (470 MHz,  $\text{CDCl}_3$ )  $\delta$  -79.27 (t,  $J = 13.5$  Hz, 2F). MP 35–36 °C. HRMS (ESI) $^+$   $m/z$ :  $[\text{M} + \text{H}]^+$  calc'd for  $\text{C}_{14}\text{H}_{13}\text{F}_2\text{N}_4^+$  275.1103, found 275.1108.

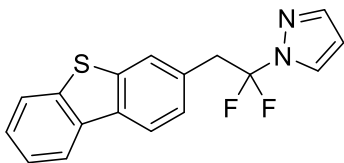

**1-(2-(dibenzo[*b,d*]thiophen-3-yl)-1,1-difluoroethyl)-1*H*-pyrazole (11c)**: Following general procedure C, *gem*-difluoroalkene **10c** (0.123 g, 0.500 mmol) was reacted with 1*H*-pyrazole (0.041 g, 0.60 mmol) in the presence of 1,2-diphenyldisilane (7.8 mg, 0.025 mmol) and [5,5'-bis(trifluoromethyl)-2,2'-bipyridine-*N*1,*N*1']bis[3,5-difluoro-2-[5-(trifluoromethyl)-2-pyridinyl-*N*]phenyl-*C*]iridium(III) hexafluorophosphate (28.6 mg, 0.0250 mmol) in DCE (2.0 mL) using a 40 W 427 nm LED cooled by a fan for 38 h. The material was isolated according to the general procedure and purified by normal-phase flash chromatography using EtOAc and hexanes (0→10% EtOAc) to furnish desired product **11c** as a colorless solid (0.085 g, 54%).  $^1\text{H}$  NMR (500 MHz,  $\text{CDCl}_3$ )  $\delta$  8.15–8.13 (m, 1H), 8.10 (d,  $J = 7.8$  Hz, 1H), 7.89–7.86 (m, 1H), 7.76 (d,  $J = 1.8$  Hz, 1H), 7.71 (d,  $J = 2.6$  Hz, 1H), 7.50–7.45 (m, 2H), 7.39 (t,  $J = 7.6$  Hz, 1H), 7.25 (d,  $J = 7.1$  Hz, 1H), 6.37 (t,  $J = 2.2$  Hz, 1H), 4.21 (t,  $J = 14.1$  Hz, 2H).  $^{13}\text{C}\{^1\text{H}\}$  NMR (126 MHz,  $\text{CDCl}_3$ )  $\delta$  142.0, 141.5, 139.1, 136.2, 135.9, 128.9, 127.7, 127.1, 125.9, 124.8, 124.6, 122.9, 121.9, 121.3, 120.1 (t,  $J = 254.8$  Hz), 107.6, 40.9 (t,  $J = 28.2$  Hz).  $^{19}\text{F}$  NMR (470 MHz,  $\text{CDCl}_3$ )  $\delta$  -77.67 (t,  $J = 14.5$  Hz, 2F). MP 114–118 °C. HRMS (ESI) $^+$   $m/z$ :  $[\text{M} + \text{H}]^+$  calc'd for  $\text{C}_{17}\text{H}_{13}\text{F}_2\text{N}_2\text{S}^+$  315.0762, found 315.0767.

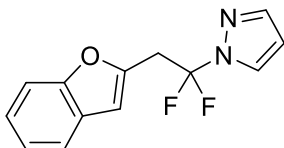

**1-(2-(benzofuran-2-yl)-1,1-difluoroethyl)-1*H*-pyrazole (11d)**: With slight modification to general procedure D, *gem*-difluoroalkene **10d** (0.090 g, 0.500 mmol) was reacted with 1*H*-pyrazole (0.041 g, 0.60 mmol) in the presence of 1,2-diphenyldisilane (23.4 mg, 0.0750 mmol) and 9-mesityl-3,6-di-*tert*-butyl-10-phenylacridinium tetrafluoroborate (8.6 mg, 0.015 mmol) in dry PhMe (2.0 mL) using a 40 W 427 nm LED cooled by a fan for 16 h. The material was isolated according to the general procedure and purified by normal-phase flash chromatography using EtOAc and hexanes (0→10% EtOAc) to afford the product **11d** as a pale yellow solid (0.073 g, 59%).  $^1\text{H}$  NMR (500 MHz,  $\text{CDCl}_3$ )  $\delta$  7.78 (d,  $J = 2.6$  Hz, 1H), 7.72 (d,  $J = 1.8$  Hz, 1H), 7.50 (dd,  $J = 7.7$ , 1.3 Hz, 1H), 7.45 (d,  $J = 8.2$  Hz, 1H), 7.29–7.25 (m, 1H), 7.20 (td,  $J = 7.5$ , 1.1 Hz, 1H), 6.54 (s, 1H), 6.38 (t,  $J = 2.1$  Hz, 1H), 4.16 (t,  $J = 13.2$  Hz, 2H).  $^{13}\text{C}\{^1\text{H}\}$  NMR (126 MHz,  $\text{CDCl}_3$ )  $\delta$  155.1, 148.5, 142.0, 128.4, 127.6, 124.4, 122.9, 121.0, 118.7 (t,  $J = 254.3$  Hz), 111.3, 107.8, 106.9, 35.4 (t,  $J = 29.3$  Hz).  $^{19}\text{F}$  NMR (470 MHz,  $\text{CDCl}_3$ )  $\delta$  -77.78 (t,  $J = 13.5$  Hz, 2F). MP 47–50 °C. HRMS (ESI) $^+$   $m/z$ :  $[\text{M} + \text{H}]^+$  calc'd for  $\text{C}_{13}\text{H}_{11}\text{F}_2\text{N}_2\text{O}^+$  249.0834, found 249.0835.

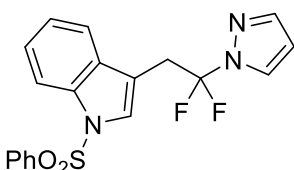

**3-(2,2-difluoro-2-(1*H*-pyrazol-1-yl)ethyl)-1-(phenylsulfonyl)-1*H*-indole (11e)**: Following general procedure C, *gem*-difluoroalkene **10e** (0.160 g, 0.500 mmol) was reacted with 1*H*-pyrazole (0.041 g, 0.60 mmol) in the presence of 1,2-diphenyldisilane (7.8 mg, 0.025 mmol) and [5,5'-bis(trifluoromethyl)-2,2'-bipyridine-*N*1,*N*1']bis[3,5-difluoro-2-[5-(trifluoromethyl)-2-pyridinyl-*N*]phenyl-*C*]iridium(III) hexafluorophosphate (28.6 mg, 0.0250 mmol) in DCE (2.0 mL) using a 40 W 427 nm LED cooled by a fan for 15 h. The material was isolated

according to the general procedure and purified by normal-phase flash chromatography using EtOAc and hexanes (0→40% EtOAc) to furnish desired product **11e** as a pale yellow solid (0.104 g, 54%). <sup>1</sup>H NMR (500 MHz, CDCl<sub>3</sub>) δ 7.96 (d, *J* = 8.3 Hz, 1H), 7.76 (d, *J* = 7.4 Hz, 2H), 7.71 (s, 1H), 7.61 (d, *J* = 2.6 Hz, 1H), 7.54–7.50 (m, 2H), 7.41–7.38 (m, 3H), 7.32 (t, *J* = 7.4 Hz, 1H), 7.25 (t, *J* = 7.5 Hz, 1H), 6.31 (t, *J* = 2.2 Hz, 1H), 4.00 (t, *J* = 13.4 Hz, 2H). <sup>13</sup>C{<sup>1</sup>H} NMR (126 MHz, CDCl<sub>3</sub>) δ 141.9, 138.0, 134.9, 134.0, 130.8, 129.3, 127.6, 126.8, 126.4, 125.1, 123.6, 119.8 (t, *J* = 253.4 Hz), 119.7, 113.7, 112.7, 107.5, 31.7 (t, *J* = 29.3 Hz). <sup>19</sup>F NMR (470 MHz, CDCl<sub>3</sub>) δ -78.10 (t, *J* = 13.4 Hz, 2F). MP 114–120 °C. HRMS (ESI)<sup>+</sup> *m/z*: [M + H]<sup>+</sup> calc'd for C<sub>19</sub>H<sub>16</sub>F<sub>2</sub>N<sub>3</sub>O<sub>2</sub>S<sup>+</sup> 388.0926, found 388.0930.

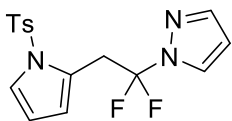

**1-(1,1-difluoro-2-(1-tosyl-1H-pyrrol-2-yl)ethyl)-1H-pyrazole (11f):** Following general procedure D, *gem*-difluoroalkene **10f** (0.142 g, 0.500 mmol) was reacted with 1H-pyrazole (0.041 g, 0.60 mmol) in the presence of 1,2-diphenyldisilane (7.8 mg, 0.025 mmol) and 9-mesityl-3,6-di-*tert*-butyl-10-phenylacridinium tetrafluoroborate (8.6 mg, 0.015 mmol) in dry PhMe (2.0 mL) using a 40 W 427 nm LED cooled by a fan for 15 h. The material was isolated according to the general procedure and purified by normal-phase flash chromatography using EtOAc and hexanes (0→20% EtOAc) to afford a mixture of desired product **11f** and unidentified impurities as a purple solid. The solid was washed with a Et<sub>2</sub>O/pentane solution (20% Et<sub>2</sub>O, 5 x 3 mL) and dried *in vacuo* to afford the product **11f** as a brown solid (0.075 g, 43%). <sup>1</sup>H NMR (500 MHz, CDCl<sub>3</sub>) δ 7.73 (d, *J* = 2.6 Hz, 1H), 7.69 (s, 1H), 7.68 (s, 1H), 7.64 (s, 1H), 7.32 (dd, *J* = 3.4, 1.6 Hz, 1H), 7.30 (s, 1H), 7.28 (s, 1H), 6.36 (t, *J* = 2.1 Hz, 1H), 6.18 (t, *J* = 3.4 Hz, 1H), 5.96 (s, 1H), 4.23 (td, *J* = 13.4, 2.9 Hz, 2H), 2.40 (s, 2H). <sup>13</sup>C{<sup>1</sup>H} NMR (126 MHz, CDCl<sub>3</sub>) δ 145.3, 141.8, 136.4, 130.2, 127.6, 126.9, 124.4, 123.7, 119.0 (t, *J* = 253.7 Hz), 116.0, 112.0, 107.6, 33.0 (t, *J* = 29.1 Hz), 21.7. <sup>19</sup>F NMR (470 MHz, CDCl<sub>3</sub>) δ -78.30 (t, *J* = 13.6 Hz, 2F). MP 139–143 °C. HRMS (ESI)<sup>+</sup> *m/z*: [M + H]<sup>+</sup> calc'd for C<sub>16</sub>H<sub>16</sub>F<sub>2</sub>N<sub>3</sub>O<sub>2</sub>S<sup>+</sup> 352.0926, found 352.0931.

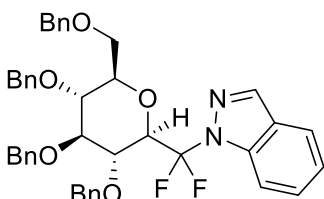

**1-(difluoro((2R,3R,4S,5R,6R)-3,4,5-tris(benzyloxy)-6-((benzyloxy)methyl)tetrahydro-2H-pyran-2-yl)methyl)-1H-indazole (11g):** Following general procedure C, *gem*-difluoroalkene **10g** (0.286 g, 0.500 mmol) was reacted with 1H-indazole (0.071 g, 0.60 mmol) in the presence of 1,2-diphenyldisilane (7.8 mg, 0.025 mmol) and [5,5'-bis(trifluoromethyl)-2,2'-bipyridine-*N*1,*N*1']bis[3,5-difluoro-2-[5-(trifluoromethyl)-2-pyridinyl-*N*]phenyl-C]iridium(III) hexafluorophosphate (28.6 mg, 0.0250 mmol) in dry DCE (2.0 mL) using a 40 W 427 nm LED cooled by a fan for 48 h. The reaction produced a mixture of the two *N*-regioisomers of desired product **11g** (*N*1:*N*2 = 13:1), as determined by <sup>19</sup>F NMR analysis of the crude reaction mixture. The material was isolated according to the general procedure and purified by normal-phase flash chromatography using EtOAc and hexanes (0→25% EtOAc) to deliver a mixture of desired product **11g** and its isomer. This mixture was further purified by crystallization to remove the undesired isomer of **11g**. Specifically, the mixture was dissolved in hexanes (5 mL) at 67 °C and then left to cool to rt. Desired product **11g** began to precipitate after 1 h, and the mixture was left undisturbed for 16 h at rt to ensure complete crystallization. Then, the liquor was removed from the mixture and the remaining precipitate was washed with cold pentane (0 °C, 5 x 3 mL). After removing residual pentane *in vacuo*, product **11g** was obtained as a colorless solid (0.167 g, 48%). <sup>1</sup>H NMR (800 MHz, CDCl<sub>3</sub>) δ 8.07 (s, 1H), 7.84 (d, *J* = 8.4 Hz, 1H), 7.70 (d, *J* = 8.0 Hz, 1H), 7.45 (ddd, *J* = 8.3, 6.9, 1.1 Hz, 1H), 7.33–7.19 (m, 17H), 7.15–7.14 (m, 2H), 7.10–7.08 (m, 2H), 4.94 (d, *J* = 10.9 Hz, 1H), 4.92 (d, *J* = 10.9 Hz, 1H), 4.84 (d, *J* = 10.9 Hz, 1H). S24

= 10.1 Hz, 1H), 4.82 (d,  $J$  = 10.9 Hz, 1H), 4.76 (d,  $J$  = 10.1 Hz, 1H), 4.62–4.57 (m, 2H), 4.31 (d,  $J$  = 12.1 Hz, 1H), 4.22 (d,  $J$  = 12.1 Hz, 1H), 4.08 (t,  $J$  = 9.3 Hz, 1H), 3.84 (t,  $J$  = 9.0 Hz, 1H), 3.66 (t,  $J$  = 9.4 Hz, 1H), 3.58 (dd,  $J$  = 11.6, 4.4 Hz, 1H), 3.53–3.49 (m, 2H).  $^{13}\text{C}\{^1\text{H}\}$  NMR (201 MHz,  $\text{CDCl}_3$ )  $\delta$  139.9, 138.6, 138.4, 138.1, 137.9, 137.3, 128.6, 128.6, 128.4, 128.3, 128.1, 128.1, 128.0, 127.9, 127.8, 127.8, 127.6, 127.5, 125.3, 122.6, 121.2, 120.5 (t,  $J$  = 257.5 Hz), 112.5, 87.0, 79.7, 78.0, 77.9, 77.6–77.3 (m), 76.1, 75.2, 75.2, 73.3, 68.5.  $^{13}\text{C}\{^1\text{H}\}$  NMR (201 MHz,  $(\text{CD}_3)_2\text{CO}$ )<sup>\*</sup>  $\delta$  140.7, 140.0, 139.7, 139.6, 139.4, 138.4, 129.3, 129.2, 129.1, 129.0, 129.0, 128.8, 128.6, 128.5, 128.4, 128.4, 128.2, 126.4, 123.5, 122.4, 121.8 (t,  $J$  = 257.1 Hz), 113.1 (t,  $J$  = 5.8 Hz), 87.5, 80.3, 78.9, 78.0 (dd,  $J$  = 32.5, 26.8 Hz), 76.3, 75.5, 75.4, 73.7, 69.7.  $^{19}\text{F}$  NMR (470 MHz,  $\text{CDCl}_3$ )  $\delta$  -83.00 (d,  $J$  = 212.8 Hz, 1F), -94.01 (dd,  $J$  = 212.3, 13.0 Hz, 1F). MP 60–62 °C. HRMS (ESI)<sup>+</sup>  $m/z$ :  $[\text{M} + \text{H}]^+$  calc'd for  $\text{C}_{42}\text{H}_{41}\text{F}_2\text{N}_2\text{O}_5^+$  691.2978, found 691.2982. Absolute stereochemistry and the N<sub>1</sub>-regiochemical assignment for the major product were made using X-ray crystallography (CCDC 2414370).

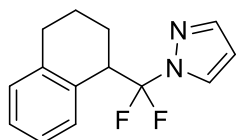

**1-(difluoro(1,2,3,4-tetrahydronaphthalen-1-yl)methyl)-1H-pyrazole (11h):** Following general procedure C, *gem*-difluoroalkene **10h** (0.090 g, 0.50 mmol) was reacted with 1H-pyrazole (0.041 g, 0.60 mmol) in the presence of 1,2-diphenyldisilane (7.8 mg, 0.025 mmol) and [5,5'-bis(trifluoromethyl)-2,2'-bipyridine-*N*1,*N*1']bis[3,5-difluoro-2-[5-(trifluoromethyl)-2-pyridinyl-*N*]phenyl-C]iridium(III) hexafluorophosphate (28.6 mg, 0.0250 mmol) in dry DCE (2.0 mL) using a 40 W 427 nm LED cooled by a fan for 14 h. The material was isolated according to the general procedure and purified by normal-phase flash chromatography using EtOAc and hexanes (0→5% EtOAc) to obtain a mixture of desired product **11h** with two additional uncharacterized compounds. This product-containing mixture was then further purified by normal-phase preparative TLC using pentane to furnish desired product **11h** as a pale yellow oil (0.106 g, 85%).  $^1\text{H}$  NMR (500 MHz,  $\text{CDCl}_3$ )  $\delta$  7.77 (d,  $J$  = 1.9 Hz, 1H), 7.65 (d,  $J$  = 2.5 Hz, 1H), 7.19 (td,  $J$  = 7.5, 1.4 Hz, 1H), 7.14 (d,  $J$  = 7.5 Hz, 1H), 7.04 (td,  $J$  = 7.5, 1.6 Hz, 1H), 6.80 (d,  $J$  = 7.9 Hz, 1H), 6.37 (t,  $J$  = 2.2 Hz, 1H), 4.32–4.24 (m, 1H), 2.89–2.75 (m, 2H), 2.02–1.85 (m, 3H), 1.76–1.69 (m, 1H).  $^{13}\text{C}\{^1\text{H}\}$  NMR (126 MHz,  $\text{CDCl}_3$ )  $\delta$  142.1, 139.3, 130.4, 130.3, 129.4, 128.3, 127.5, 125.7, 122.0 (t,  $J$  = 260.0 Hz), 106.9, 42.8 (t,  $J$  = 24.7 Hz), 29.2, 23.2, 19.7.  $^{19}\text{F}$  NMR (470 MHz,  $\text{CDCl}_3$ )  $\delta$  -81.47 (dd,  $J$  = 203.1, 16.3 Hz, 1F), -84.92 (dd,  $J$  = 203.6, 14.0 Hz, 1F). HRMS (ESI)<sup>+</sup>  $m/z$ :  $[\text{M} + \text{H}]^+$  calc'd for  $\text{C}_{14}\text{H}_{15}\text{F}_2\text{N}_2^+$  249.1198, found 249.1202.

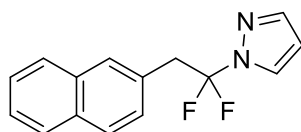

**1-(1,1-difluoro-2-(naphthalen-2-yl)ethyl)-1H-pyrazole (11i):** Following general procedure D, *gem*-difluoroalkene **10i** (0.090 g, 0.50 mmol) was reacted with 1H-pyrazole (0.041 g, 0.60 mmol) in the presence of 1,2-diphenyldisilane (7.8 mg, 0.025 mmol) and 9-mesityl-3,6-di-*tert*-butyl-10-phenylacridinium tetrafluoroborate (8.6 mg, 0.015 mmol) in dry PhMe (2.0 mL) using a 40 W 427 nm LED cooled by a fan for 15 h. The material was isolated according to the general procedure and purified by normal-phase flash chromatography using EtOAc and hexanes (0→15% EtOAc) to obtain a mixture of desired product **11i** with two additional uncharacterized compounds. This product-containing mixture was then further purified by normal-phase preparative TLC using 5% EtOAc in pentane to furnish desired product **11i** as a dark yellow semisolid (0.064 g, 50%).  $^1\text{H}$  NMR (500 MHz,  $\text{CDCl}_3$ )  $\delta$  7.83–7.75 (m, 4H), 7.69 (s, 1H), 7.64 (d,  $J$  = 2.6 Hz, 1H), 7.50–

\* A  $^{13}\text{C}\{^1\text{H}\}$  NMR in  $(\text{CD}_3)_2\text{CO}$  was taken to account for the **11g** methine carbon signal [ $\delta$  78.0 (dd,  $J$  = 32.5, 26.8 Hz)] that was obscured by the trace  $\text{CHCl}_3$  peak in the  $\text{CDCl}_3$   $^{13}\text{C}\{^1\text{H}\}$  NMR.

7.46 (m, 2H), 7.30 (dd,  $J = 8.4, 1.7$  Hz, 1H), 6.31 (t,  $J = 2.2$  Hz, 1H), 4.06 (t,  $J = 13.8$  Hz, 2H).  $^{13}\text{C}\{^1\text{H}\}$  NMR (126 MHz,  $\text{CDCl}_3$ )  $\delta$  141.9, 133.3, 132.8, 129.9, 128.7 (t,  $J = 3.4$  Hz), 128.1, 127.9, 127.8, 127.7, 126.3, 120.0 (t,  $J = 253.9$  Hz), 107.3, 41.9 (t,  $J = 27.6$  Hz).  $^{19}\text{F}$  NMR (470 MHz,  $\text{CDCl}_3$ )  $\delta$  -79.00 (t,  $J = 13.8$  Hz, 2F). HRMS (APCI) $^+$   $m/z$ :  $[\text{M} + \text{H}]^+$  calc'd for  $\text{C}_{15}\text{H}_{13}\text{F}_2\text{N}_2^+$  259.1041, found 259.1043.

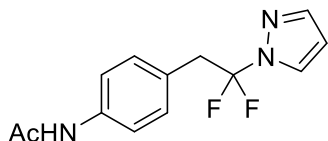

***N*-(4-(2,2-difluoro-2-(1*H*-pyrazol-1-yl)ethyl)phenyl)acetamide (11j)**: Following general procedure D, *gem*-difluoroalkene **10j** (0.099 g, 0.500 mmol) was reacted with 1*H*-pyrazole (0.041 g, 0.60 mmol) in the presence of 1,2-diphenyldisilane (7.8 mg, 0.025 mmol) and 9-mesityl-3,6-di-*tert*-butyl-10-phenylacridinium tetrafluoroborate (8.6 mg, 0.015 mmol) in dry PhMe (2.0 mL) using a 40 W 427 nm LED cooled by a fan for 15 h. The crude reaction mixture was filtered through a pad of silica with EtOAc (~100 mL) to remove the photocatalyst. The resulting filtrate was dried *in vacuo* to afford a brown solid. This mixture was further purified by crystallization. Specifically, the mixture was dissolved in an EtOAc/hexanes solution (25% EtOAc, 5 mL) at 67 °C and then left to cool to rt. Desired product **11j** began to precipitate after 1 h, and the mixture was left undisturbed for 24 h at rt to ensure complete crystallization. Then, the liquor was removed from the mixture and the remaining precipitate was washed with a Et<sub>2</sub>O/pentane solution (25% Et<sub>2</sub>O, 5 x 3 mL). After removing residual solvent *in vacuo*, product **11j** was obtained as a colorless solid (0.109 g, 82%).  $^1\text{H}$  NMR (500 MHz,  $\text{CDCl}_3$ )  $\delta$  7.69 (s, 1H), 7.65–7.60 (m, 1H), 7.40 (d,  $J = 8.1$  Hz, 2H), 7.29 (s, 1H), 7.11 (d,  $J = 8.0$  Hz, 2H), 6.31 (s, 1H), 3.82 (t,  $J = 13.8$  Hz, 2H), 2.15 (s, 3H).  $^{13}\text{C}\{^1\text{H}\}$  NMR (201 MHz,  $\text{CDCl}_3$ )  $\delta$  168.4, 141.9, 137.6, 131.2, 127.8, 127.0, 119.9 (t,  $J = 253.7$  Hz), 119.8, 107.3, 41.2 (t,  $J = 27.8$  Hz), 24.7.  $^{19}\text{F}$  NMR (470 MHz,  $\text{CDCl}_3$ )  $\delta$  -79.40 (t,  $J = 13.8$  Hz, 2F). MP 110–115 °C. HRMS (ESI) $^+$   $m/z$ :  $[\text{M} + \text{H}]^+$  calc'd for  $\text{C}_{13}\text{H}_{14}\text{F}_2\text{N}_3\text{O}^+$  266.1099, found 266.1105.

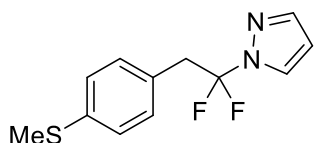

**1-(1,1-difluoro-2-(4-(methylthio)phenyl)ethyl)-1*H*-pyrazole (11k)**: Following general procedure D, *gem*-difluoroalkene **10k** (0.093 g, 0.500 mmol) was reacted with 1*H*-pyrazole (0.041 g, 0.60 mmol) in the presence of 1,2-diphenyldisilane (7.8 mg, 0.025 mmol) and 9-mesityl-3,6-di-*tert*-butyl-10-phenylacridinium tetrafluoroborate (8.6 mg, 0.015 mmol) in dry PhMe (2.0 mL) using a 40 W 427 nm LED cooled by a fan for 15 h. The material was isolated according to the general procedure and purified by normal-phase flash chromatography using EtOAc and hexanes (0→20% EtOAc) to furnish desired product **11k** as a yellow semisolid (0.103 g, 81%).  $^1\text{H}$  NMR (500 MHz,  $\text{CDCl}_3$ )  $\delta$  7.69 (d,  $J = 1.9$  Hz, 1H), 7.64 (d,  $J = 2.6$  Hz, 1H), 7.14 (d,  $J = 8.3$  Hz, 2H), 7.09 (d,  $J = 8.3$  Hz, 2H), 6.32 (d,  $J = 1.6$  Hz, 1H), 3.83 (t,  $J = 13.8$  Hz, 2H), 2.45 (s, 3H).  $^{13}\text{C}\{^1\text{H}\}$  NMR (126 MHz,  $\text{CDCl}_3$ )  $\delta$  141.9, 138.3, 131.0, 127.8, 126.4, 119.9 (t,  $J = 253.4$  Hz), 107.3, 41.2 (t,  $J = 27.6$  Hz), 15.7.  $^{19}\text{F}$  NMR (470 MHz,  $\text{CDCl}_3$ )  $\delta$  -79.32 (t,  $J = 13.7$  Hz, 2F). HRMS (ESI) $^+$   $m/z$ :  $[\text{M} + \text{H}]^+$  calc'd for  $\text{C}_{12}\text{H}_{13}\text{F}_2\text{N}_2\text{S}^+$  255.0762, found 255.0763.



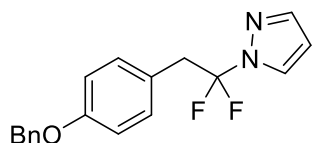

**1-(2-(4-(benzyloxy)phenyl)-1,1-difluoroethyl)-1H-pyrazole (11l):** Following general procedure D, *gem*-difluoroalkene **10l** (0.123 g, 0.500 mmol) was reacted with 1*H*-pyrazole (0.041 g, 0.60 mmol) in the presence of 1,2-diphenyldisilane (7.8 mg, 0.025 mmol) and 9-mesityl-3,6-di-*tert*-butyl-10-phenylacridinium tetrafluoroborate (8.6 mg, 0.015 mmol) in dry PhMe (2.0 mL) using a 40 W 427 nm LED cooled by a fan for 15 h. The material was isolated according to the general procedure and purified by normal-phase flash chromatography using EtOAc and hexanes (0→15% EtOAc) to furnish desired product **11l** as a yellow solid (0.130 g, 83%). <sup>1</sup>H NMR (500 MHz, CDCl<sub>3</sub>) δ 7.72 (d, *J* = 1.8 Hz, 1H), 7.66 (d, *J* = 2.6 Hz, 1H), 7.45–7.39 (m, 4H), 7.36–7.33 (m, 1H), 7.12 (d, *J* = 8.2 Hz, 2H), 6.90 (d, *J* = 8.6 Hz, 2H), 6.34 (t, *J* = 2.2 Hz, 1H), 5.04 (s, 2H), 3.83 (t, *J* = 13.9 Hz, 2H). <sup>13</sup>C{<sup>1</sup>H} NMR (126 MHz, CDCl<sub>3</sub>) δ 158.5, 141.8, 137.0, 131.7, 128.7, 128.1, 127.7, 127.6, 123.5 (d, *J* = 3.4 Hz), 120.0 (t, *J* = 253.4 Hz), 114.8, 107.2, 70.0, 40.9 (t, *J* = 27.6 Hz). <sup>19</sup>F NMR (470 MHz, CDCl<sub>3</sub>) δ -79.61 (t, *J* = 13.9 Hz, 2F). MP 67–69 °C. HRMS (ESI)<sup>+</sup> *m/z*: [M + H]<sup>+</sup> calc'd for C<sub>18</sub>H<sub>17</sub>F<sub>2</sub>N<sub>2</sub>O<sup>+</sup> 315.1303, found 315.1308.

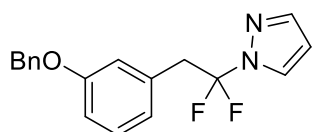

**1-(2-(3-(benzyloxy)phenyl)-1,1-difluoroethyl)-1H-pyrazole (11m):** Following general procedure C, *gem*-difluoroalkene **10m** (0.123 g, 0.500 mmol) was reacted with 1*H*-pyrazole (0.041 g, 0.60 mmol) in the presence of 1,2-diphenyldisilane (7.8 mg, 0.025 mmol) and [5,5'-bis(trifluoromethyl)-2,2'-bipyridine-*N*1,*N*1']bis[3,5-difluoro-2-[5-(trifluoromethyl)-2-pyridinyl-*N*]phenyl-C]iridium(III) hexafluorophosphate (28.6 mg, 0.0250 mmol) in DCE (2.0 mL) using a 40 W 427 nm LED cooled by a fan for 38 h. The material was isolated according to the general procedure and purified by normal-phase flash chromatography using EtOAc and hexanes (0→10% EtOAc) to furnish desired product **11m** as a colorless semisolid (0.089 g, 57%). <sup>1</sup>H NMR (500 MHz, CDCl<sub>3</sub>) δ 7.72 (s, 1H), 7.66 (s, 1H), 7.46–7.39 (m, 5H), 7.36 (t, *J* = 6.9 Hz, 1H), 7.21 (t, *J* = 8.0 Hz, 1H), 6.98–6.87 (m, 2H), 6.82 (d, *J* = 6.9 Hz, 1H), 6.34 (s, 1H), 5.01 (s, 2H), 3.88 (t, *J* = 13.8 Hz, 2H). <sup>13</sup>C{<sup>1</sup>H} NMR (201 MHz, CDCl<sub>3</sub>) δ 158.9, 141.8, 137.0, 132.6, 129.5, 128.7, 128.1, 127.8, 127.6, 123.3, 119.9 (t, *J* = 253.9 Hz), 117.0, 114.5, 107.3, 70.1, 41.8 (t, *J* = 27.6 Hz). <sup>19</sup>F NMR (470 MHz, CDCl<sub>3</sub>) -79.05 (t, *J* = 13.8 Hz, 2F). HRMS (ESI)<sup>+</sup> *m/z*: [M + H]<sup>+</sup> calc'd for C<sub>18</sub>H<sub>17</sub>F<sub>2</sub>N<sub>2</sub>O<sup>+</sup> 315.1303, found 315.1309.

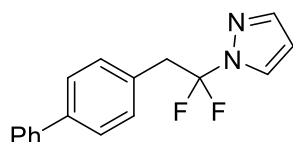

**1-(2-([1,1'-biphenyl]-4-yl)-1,1-difluoroethyl)-1H-pyrazole (11n):** Following general procedure D, *gem*-difluoroalkene **10n** (0.108 g, 0.500 mmol) was reacted with 1*H*-pyrazole (0.041 g, 0.60 mmol) in the presence of 1,2-diphenyldisilane (7.8 mg, 0.025 mmol) and 9-mesityl-3,6-di-*tert*-butyl-10-phenylacridinium tetrafluoroborate (8.6 mg, 0.015 mmol) in dry PhMe (2.0 mL) using a 40 W 427 nm LED cooled by a fan for 14 h. The material was isolated according to the general procedure and purified by normal-phase flash chromatography using EtOAc and hexanes (0→15% EtOAc) to obtain a mixture of desired product **11n**, (PhSe)<sub>2</sub>, and an unidentified compound. This product-containing mixture was then further purified by normal-phase preparative TLC using EtOAc and hexanes (20% EtOAc) to furnish desired product **11n** as a pale yellow solid (0.124 g, 87%). <sup>1</sup>H NMR (500 MHz, CDCl<sub>3</sub>) δ 7.73 (d, *J* = 1.8 Hz, 1H), 7.69 (d, *J* = 2.6 Hz, 1H), 7.57 (d, *J* = 7.0 Hz, 2H), 7.51 (d, *J* = 8.2 Hz, 2H), 7.43 (t, *J* = 7.7 Hz, 2H), 7.35 (t, *J* = 7.3 Hz, 1H), 7.26 (d, *J* = 8.1 Hz, 2H), 6.35–

6.34 (m, 1H), 3.93 (t,  $J = 14.0$  Hz, 2H).  $^{13}\text{C}\{^1\text{H}\}$  NMR (126 MHz,  $\text{CDCl}_3$ )  $\delta$  141.6, 140.5, 140.5, 130.8, 130.0, 128.7, 127.6, 127.3, 127.0, 127.0, 119.7 (t,  $J = 253.6$  Hz), 107.1, 41.2 (t,  $J = 27.6$  Hz).  $^{19}\text{F}$  NMR (470 MHz,  $\text{CDCl}_3$ )  $\delta$  -79.07 (t,  $J = 14.5$  Hz, 2F). MP 74–77 °C. HRMS (ESI) $^+$   $m/z$ :  $[\text{M} + \text{H}]^+$  calc'd for  $\text{C}_{17}\text{H}_{15}\text{F}_2\text{N}_2^+$  285.1198, found 285.1203.

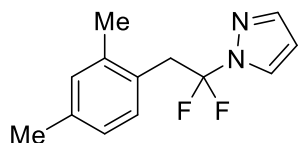

**1-(2-(2,4-dimethylphenyl)-1,1-difluoroethyl)-1H-pyrazole (11o):** Following general procedure D, *gem*-difluoroalkene **10o** (0.084 g, 0.50 mmol) was reacted with 1H-pyrazole (0.041 g, 0.600 mmol) in the presence of 1,2-diphenyldisilane (7.8 mg, 0.025 mmol) and 9-mesityl-3,6-di-*tert*-butyl-10-phenylacridinium tetrafluoroborate (8.6 mg, 0.015 mmol) in dry PhMe (2.0 mL) using a 40 W 427 nm LED cooled by a fan for 44 h. The material was isolated according to the general procedure and purified by normal-phase flash chromatography using EtOAc and hexanes (0→5% EtOAc) to afford the desired product **11o** as a yellow oil (0.083 g, 70%).  $^1\text{H}$  NMR (500 MHz,  $\text{CDCl}_3$ )  $\delta$  7.72–7.71 (m, 1H), 7.67 (d,  $J = 3.1$  Hz, 1H), 7.01 (s, 1H), 6.98 (d,  $J = 7.8$  Hz, 1H), 6.92 (d,  $J = 7.8$  Hz, 1H), 6.36 (t,  $J = 2.1$  Hz, 1H), 3.87 (t,  $J = 14.6$  Hz, 2H), 2.32 (s, 3H), 2.30 (s, 3H).  $^{13}\text{C}\{^1\text{H}\}$  NMR (126 MHz,  $\text{CDCl}_3$ )  $\delta$  141.7, 137.9, 137.7, 131.4, 131.3, 127.7, 126.8, 126.6, 120.3 (t,  $J = 253.9$  Hz), 107.3, 38.2 (t,  $J = 27.3$  Hz), 21.1, 19.8.  $^{19}\text{F}$  NMR (470 MHz,  $\text{CDCl}_3$ )  $\delta$  -79.03 (t,  $J = 14.6$  Hz, 2F). HRMS (ESI) $^+$   $m/z$ :  $[\text{M} + \text{H}]^+$  calc'd for  $\text{C}_{13}\text{H}_{15}\text{F}_2\text{N}_2^+$  237.1198, found 237.1201.

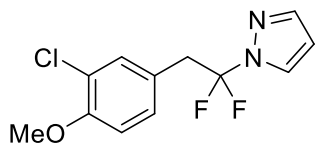

**1-(2-(3-chloro-4-methoxyphenyl)-1,1-difluoroethyl)-1H-pyrazole (11p):** Following general procedure C, *gem*-difluoroalkene **10p** (0.102 g, 0.500 mmol) was reacted with 1H-pyrazole (0.041 g, 0.60 mmol) in the presence of 1,2-diphenyldisilane (7.8 mg, 0.025 mmol) and [5,5'-bis(trifluoromethyl)-2,2'-bipyridine-*N*1,*N*1']bis[3,5-difluoro-2-[5-(trifluoromethyl)-2-pyridinyl-*N*]phenyl-C]iridium(III) hexafluorophosphate (28.6 mg, 0.0250 mmol) in dry DCE (2.0 mL) using a 40 W 427 nm LED cooled by a fan for 14 h. The material was isolated according to the general procedure and purified by normal-phase flash chromatography using EtOAc and hexanes (0→12% EtOAc) to furnish desired product **11p** as a colorless oil (0.114 g, 84%).  $^1\text{H}$  NMR (500 MHz,  $\text{CDCl}_3$ )  $\delta$  7.70 (d,  $J = 1.7$  Hz, 1H), 7.26 (s, 1H), 7.20 (d,  $J = 2.2$  Hz, 1H), 7.04 (dd,  $J = 8.4, 2.2$  Hz, 1H), 6.81 (d,  $J = 8.5$  Hz, 1H), 6.33 (t,  $J = 2.2$  Hz, 1H), 3.86 (s, 3H), 3.79 (t,  $J = 13.7$  Hz, 2H).  $^{13}\text{C}\{^1\text{H}\}$  NMR (126 MHz,  $\text{CDCl}_3$ )  $\delta$  154.7, 141.9, 132.2, 130.0, 127.8, 124.2, 122.3, 119.7 (t,  $J = 253.4$  Hz), 111.9, 107.4, 56.2, 40.6 (t,  $J = 27.9$  Hz).  $^{19}\text{F}$  NMR (470 MHz,  $\text{CDCl}_3$ )  $\delta$  -79.43 (t,  $J = 13.5$  Hz, 2F). HRMS (ESI) $^+$   $m/z$ :  $[\text{M} + \text{H}]^+$  calc'd for  $\text{C}_{14}\text{H}_{17}\text{F}_2\text{N}_2\text{O}_3^+$  293.0601, found 293.0603.

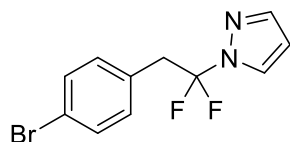

**1-(2-(4-bromophenyl)-1,1-difluoroethyl)-1H-pyrazole (11q):** Following general procedure D, *gem*-difluoroalkene **10q** (0.110 g, 0.500 mmol) was reacted with 1H-pyrazole (0.041 g, 0.60 mmol) in the presence of 1,2-diphenyldisilane (7.8 mg, 0.025 mmol) and 9-mesityl-3,6-di-*tert*-butyl-10-phenylacridinium tetrafluoroborate (8.6 mg, 0.015 mmol) in dry PhMe (2.0 mL) using a 40 W 427 nm LED cooled by a fan for 42 h. The material was isolated according to the general procedure and purified by normal-phase flash chromatography using EtOAc and hexanes (0→15% EtOAc) to obtain a mixture of desired product **11q** and two

S28

additional uncharacterized compounds. This product-containing mixture was then further purified by normal-phase preparative TLC using EtOAc and pentane (5% EtOAc) to furnish desired product **11q** as a pale yellow oil (0.034 g, 24%).  $^1\text{H}$  NMR (500 MHz,  $\text{CDCl}_3$ )  $\delta$  7.69 (d,  $J$  = 1.7 Hz, H), 7.64 (d,  $J$  = 2.6 Hz, 1H), 7.39 (d,  $J$  = 8.4 Hz, 2H), 7.06 (d,  $J$  = 8.2 Hz, 2H), 6.33 (t,  $J$  = 2.3 Hz, 1H), 3.84 (t,  $J$  = 13.7 Hz, 2H).  $^{13}\text{C}\{^1\text{H}\}$  NMR (126 MHz,  $\text{CDCl}_3$ )  $\delta$  141.9, 132.3, 131.7, 130.2, 127.7, 122.2, 119.6 (t,  $J$  = 253.9 Hz), 107.5, 41.2 (t,  $J$  = 27.8 Hz).  $^{19}\text{F}$  NMR (470 MHz,  $\text{CDCl}_3$ )  $\delta$  -79.08 (t,  $J$  = 13.7 Hz, 2F). HRMS (ESI) $^+$   $m/z$ :  $[\text{M} + \text{H}]^+$  calc'd for  $\text{C}_{11}\text{H}_{10}\text{BrF}_2\text{N}_2^+$  286.9990, found 286.9994.

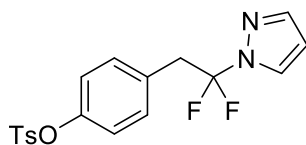

**4-(2,2-difluoro-2-(1H-pyrazol-1-yl)ethyl)phenyl 4-methylbenzenesulfonate (11r):** Following general procedure D, *gem*-difluoroalkene **10r** (0.155 g, 0.500 mmol) was reacted with 1H-pyrazole (0.041 g, 0.60 mmol) in the presence of 1,2-diphenyldisilane (7.8 mg, 0.025 mmol) and 9-mesityl-3,6-di-*tert*-butyl-10-phenylacridinium tetrafluoroborate (8.6 mg, 0.015 mmol) in dry PhMe (2.0 mL) using a 40 W 427 nm LED cooled by a fan for 48 h. The material was isolated according to the general procedure and purified by normal-phase flash chromatography using EtOAc and hexanes (0→10% EtOAc) to obtain a mixture of desired product **11r**, the des-tosyl phenolic degradation product of **11r**, and additional uncharacterized compounds. This mixture was further purified by crystallization. Specifically, the mixture was dissolved in a 7% EtOAc in hexanes solution (5 mL) at 67 °C and then left to cool to rt. Desired product **11r** began to precipitate after 1 h, and the mixture was left undisturbed for 4 h at rt to ensure complete crystallization. Then, the liquor was removed from the mixture and the remaining precipitate was washed with a 10% Et<sub>2</sub>O in pentane solution (5 x 3 mL). After removing residual solvent *in vacuo*, product **11r** was obtained as a colorless solid (0.048 g, 25%).  $^1\text{H}$  NMR (500 MHz,  $\text{CDCl}_3$ )  $\delta$  7.69–7.62 (m, 4H), 7.29 (d,  $J$  = 7.9 Hz, 2H), 7.11 (d,  $J$  = 8.2 Hz, 2H), 6.88 (d,  $J$  = 8.8 Hz, 2H), 6.32 (t,  $J$  = 2.3 Hz, 1H), 3.84 (t,  $J$  = 13.7 Hz, 2H), 2.45 (s, 3H).  $^{13}\text{C}\{^1\text{H}\}$  NMR (201 MHz,  $\text{CDCl}_3$ )  $\delta$  149.4, 145.5, 141.9, 132.5, 131.9, 130.3, 129.9, 128.6, 127.7, 122.5, 119.6 (t,  $J$  = 253.6 Hz), 107.5, 41.1 (t,  $J$  = 27.8 Hz), 21.9.  $^{19}\text{F}$  NMR (470 MHz,  $\text{CDCl}_3$ )  $\delta$  -79.11 (t,  $J$  = 13.9 Hz, 2F). MP 109–111 °C. HRMS (ESI) $^+$   $m/z$ :  $[\text{M} + \text{H}]^+$  calc'd for  $\text{C}_{18}\text{H}_{17}\text{F}_2\text{N}_2\text{O}_3\text{S}^+$  379.0922, found 379.0925.

#### 4. Gram Scale Reaction

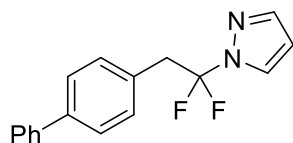

**1-(2-([1,1'-biphenyl]-4-yl)-1,1-difluoroethyl)-1H-pyrazole (11n):** A 500 mL 3-neck round bottom flask equipped with a thermometer and a stir bar was charged with *gem*-difluoroalkene **10n** (1.00 g, 4.62 mmol), 1H-pyrazole (0.378 g, 5.55 mmol), 1,2-diphenyldisilane (72.2 mg, 0.231 mmol), and 9-mesityl-3,6-di-*tert*-butyl-10-phenylacridinium tetrafluoroborate (79.6 mg, 0.139 mmol). The flask was then evacuated and backfilled with argon (3x), charged with dry PhMe (18.5 mL), and irradiated by a 40 W 427 nm LED cooled by a fan (30 °C) for 4 h (see next page for a photograph of the reaction setup). The crude reaction mixture was filtered through a pad of silica (~100 mL silica) using Et<sub>2</sub>O (500 mL) to remove photocatalyst. The resulting filtrate was then dried onto diatomaceous earth *in vacuo* and purified by normal-phase flash chromatography using DCM and hexanes (0→70% DCM) to furnish desired product **11n** as a colorless solid (0.934 g, 71%).  $^1\text{H}$  NMR and  $^{19}\text{F}$  NMR spectra of the isolated material match the previous report (see S27–28).

## Gram Scale Reaction Setup

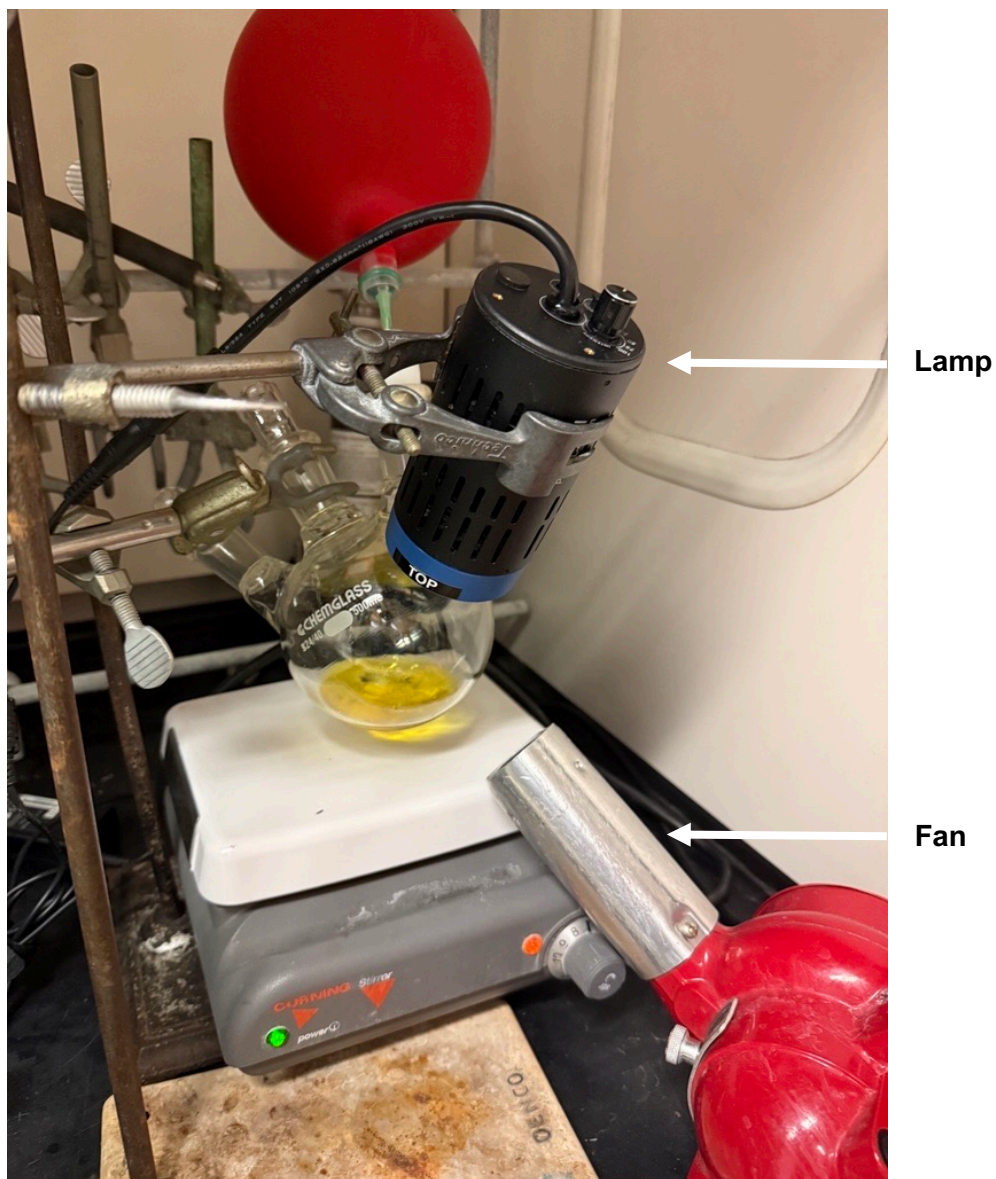

**Lamp:** Kessil PR160L-427 (427 nm light at 40 W); ~2 cm from glass

**Fan:** VARITEMP Heat Gun (on “no heat” setting; Model VT-750C); ~4 cm from glass

## 5. Mechanistic Studies

**Scheme S1.** Proposed reaction mechanism.

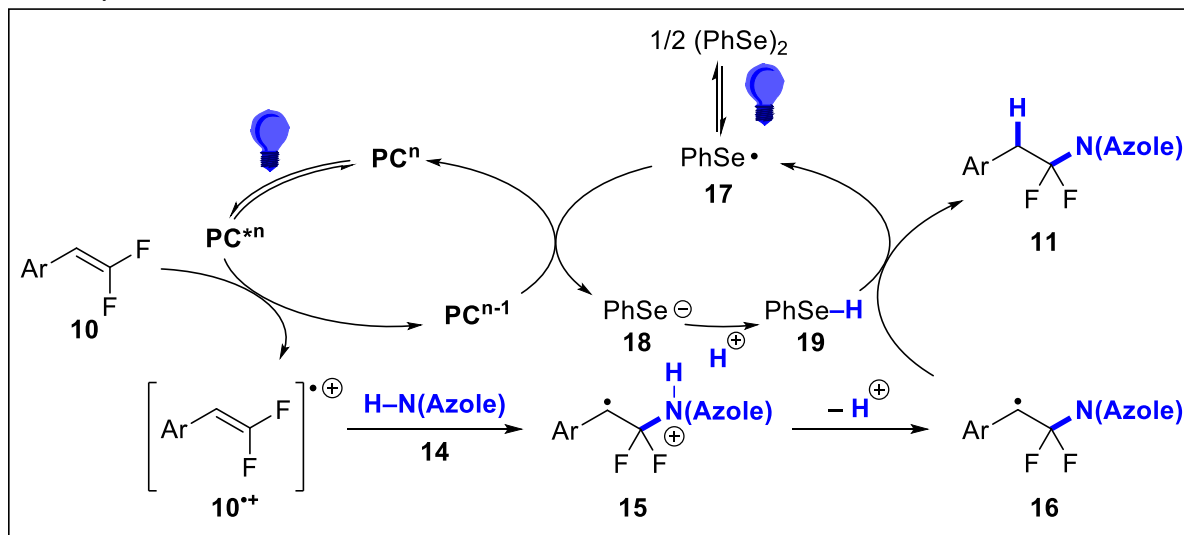

### 5.a. Luminescence Quenching and Cyclic Voltammetry

#### Luminescence Quenching Experimental Procedure

Following a previously reported procedure,<sup>16</sup> luminescence intensity measurements were performed with a BioTek Synergy NEO2 microplate reader using the instrument's monochromator functionality at an excitation wavelength of 420 nm (<6 nm bandwidth) and an emission detection wavelength of 606 nm (**PC-I**) or 517 nm (**PC-II**), which correspond to the absorption and emission maxima for **PC-I**<sup>17</sup> and **PC-II**,<sup>4</sup> respectively. Specifically, samples were prepared in an N<sub>2</sub> glovebox in polypropylene opaque flat-bottomed 96-well plates. For a given experiment, one well contained **PC-I** or **PC-II** (0.10 mM) alone in anhydrous MeCN or PhMe (150  $\mu$ L total). The subsequent 4 wells contained increasing concentrations of quencher (see below for specific values) in addition to photocatalyst (0.10 mM) in anhydrous MeCN (150  $\mu$ L total). All wells were repeated in triplicate. The 96-well plate was sealed with optical adhesive film (Applied Biosystems MicroAmp) prior to removal from the glovebox to prevent air exposure, and the plate was scanned within 5 minutes of film application to avoid condensation of solvent droplets on the film.

The recorded single-point luminescence intensities represent the average of 10 scans per well, with each scan consisting of concomitant excitation pulse and emission detection with a 100  $\mu$ s integration time. These intensities were then used to construct Stern-Volmer plots with lines of best fit according to the following equation:

$$\frac{I^0}{I} = 1 + k_q \tau [Q] \quad (1)$$

Where  $I^0$  is the recorded luminescence intensity in the absence of quencher,  $I$  is the recorded luminescence intensity in the presence of quencher,  $[Q]$  is the concentration of quencher,  $\tau$  is the literature-reported value for the lifetime of the excited state photocatalyst (**PC-I**:  $\tau = 279$  ns; **PC-II**:  $\tau = 14.4$  ns),<sup>4,18</sup> and  $k_q$  is the bimolecular quenching constant. Specifically, the "y-values" ( $\frac{I^0}{I}$ ) were obtained by dividing each replicant luminescence intensity value from the wells containing photocatalyst alone by each replicant fluorescent intensity value from the wells containing quencher. This treatment of data better incorporates error into the full dataset and results in an expansion of data such that the total number of "y-values" is the square of the number of experimentally determined luminescence intensities ( $I^0 + I$ ). "x-Values" were simply  $[Q]$ . Stern-Volmer plots using the full dataset were then constructed in GraphPad Prism, which returned values for slope, y-intercept,  $R^2$ , and error bars representing standard error. The slope of the graph was used to calculate  $k_q$  in units of ( $M^{-1} \cdot s^{-1}$ ) using the following relationship:

$$k_q = \frac{\text{slope}}{\tau} \quad (2)$$

$k_q$  was not determined for plots with fitted lines having  $R^2 < 0.5$ , and these experiments were interpreted as failing to show luminescence quenching of photocatalyst by the tested compound.

### **Cyclic Voltammetry Experimental Procedure**

Cyclic voltammograms were collected under an argon atmosphere (glovebox with  $\text{H}_2\text{O}$  and  $\text{O}_2 < 1$  ppm) using a CHI 6284E potentiostat (CH Instruments) at a scan rate of 50 mV/s. Samples were prepared in glass 20 mL scintillation vials with anhydrous, degassed DCE (5 mL),\*  $\text{NBu}_4\text{PF}_6$  (100 mM) as the supporting electrolyte, and analyte (1 mM). A three-electrode configuration was employed, which consisted of a freshly polished\*\* glassy carbon (GC) working electrode (3 mm dia. disk), platinum wire counter electrode, and silver wire QRE.

Specifically, prior to collecting data for the *gem*-difluorostyrene, azole, and  $(\text{PhSe})_2$  analytes, a cyclic voltammogram was obtained for a solution of ferrocene (Fc) between 0 and +2.5 V vs. QRE to establish an  $E_{1/2}$  value for the reversible  $\text{Fc}/\text{Fc}^+$  redox couple. Then, for each analyte, voltammograms were acquired for duplicate solutions (with no ferrocene). After completing these scans, another fresh solution of ferrocene was scanned to account for any drift in potential of the QRE, which was observed to be negligible over the duration of the experiments.

Data were analyzed using OriginPro software. The  $E_{1/2}$  value for the reversible  $\text{Fc}/\text{Fc}^+$  redox couple represents the average of the scans taken before and after studying the analytes. The reported peak potentials ( $E_p$ ) were referenced to the  $E_{1/2}(\text{Fc}/\text{Fc}^+)$  value and represent the average of the two independent measurements (rounded to the nearest 0.1 V). For compounds with multiple peaks, the reported  $E_p$  was determined from the first detected peak with respect to the scan direction. Pictured voltammograms represent one of the two independent measurements. The voltammograms are reported following the polarographic/US/Texas convention. Black arrows on the graphs indicate the scan direction.

---

\* DCE was dispensed using a clean, glass syringe and metal needle for most voltammograms (plastic syringe degradation affects the CVs).

\*\* Prior to each experiment, the GC working electrode was polished using a 0.05  $\mu\text{m}$  alumina powder suspension (Electron Microscopy Sciences) on a micro-cloth polishing pad (Buehler). Subsequently, the electrode was washed thoroughly with deionized  $\text{H}_2\text{O}$  and dried in the antechamber of the glovebox.

### 5-(2,2-difluorovinyl)-1,2,3-trimethoxybenzene (10a)

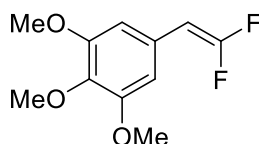

**Stern-Volmer Plot (PC-I) Full Data<sup>†</sup>**

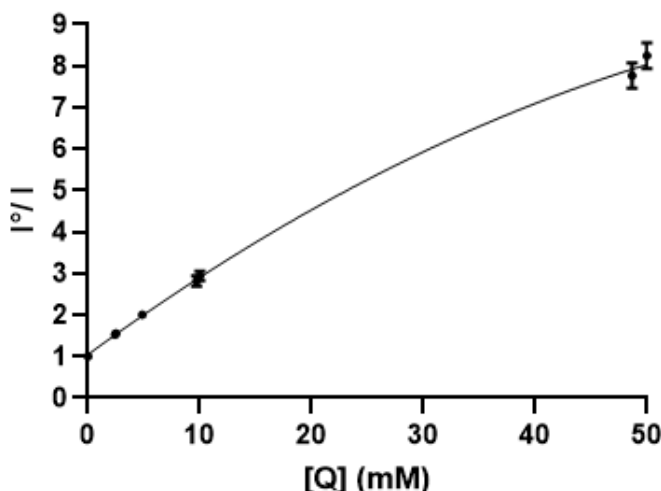

**Stern-Volmer Plot (PC-I) 0–5 mM**

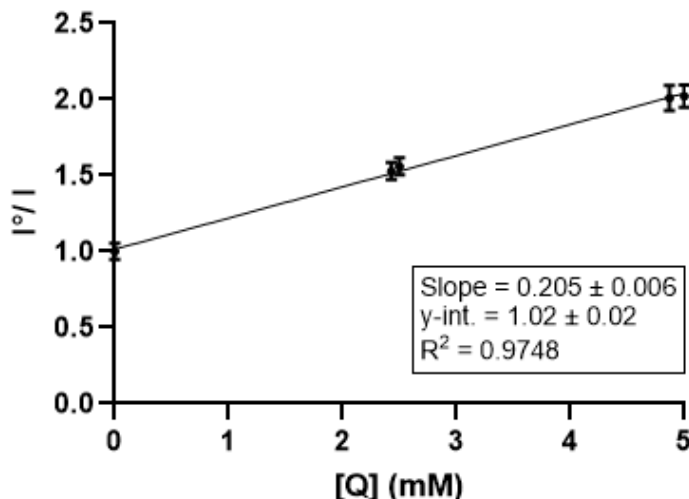

**Cyclic Voltammogram**

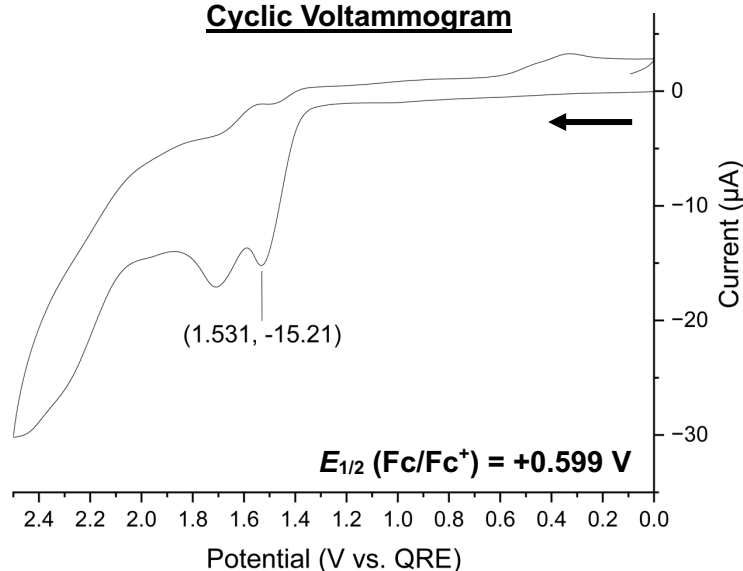

**Summarized Data**

$$E_p = +1.0 \text{ V}$$

$$k_q(\text{PC-I}) = (7.3 \pm 0.2) \times 10^8 \text{ M}^{-1} \cdot \text{s}^{-1} \dagger$$

$$k_q(\text{PC-II})^{15} = (8.33 \pm 0.07) \times 10^9 \text{ M}^{-1} \cdot \text{s}^{-1}$$

<sup>†</sup>Nonlinear luminescence quenching with negative curvature was observed in this experiment. This behavior can be caused by the existence of multiple emitters with different luminescence intensities and quenching rates.<sup>19</sup> The observed trend, then, may be indicative of the formation of a (PC-I-10a)\* complex with an intrinsic luminescence lifetime ( $\tau^{\text{complex}}$ ) and quenching rate ( $k_q^{\text{complex}}$ ) that is distinct from PC-I\* ( $\tau^{\text{PC}}$ ;  $k_q^{\text{PC}}$ ), but still relevant at the experimental detection wavelength (606 nm). The following expression relates the contribution of both emitter species to observed luminescence quenching:<sup>19</sup>

$$\frac{I^\circ}{I} = \frac{1 + (k_q^{\text{complex}} \tau^{\text{complex}} + k_q^{\text{PC}} \tau^{\text{PC}})[Q] + k_q^{\text{complex}} \tau^{\text{complex}} k_q^{\text{PC}} \tau^{\text{PC}} [Q]^2}{f(\text{complex})(1 + k_q^{\text{PC}} \tau^{\text{PC}} [Q]) + f(\text{PC})(1 + k_q^{\text{complex}} \tau^{\text{complex}} [Q])} \quad (3)$$

Where  $f(\text{complex})$  and  $f(\text{PC})$  are the respective fractional contributions to observed luminescence by PC-I\* and the (PC-I-10a)\* complex. Importantly, if PC-I\* and the (PC-I-10a)\* complex had identical fluorescent properties

( $k_q^{complex}\tau^{complex} = k_q^{PC}\tau^{PC}$ ), this expression would simplify to give the original, linear Stern-Volmer equation (eq. 1). Absent specific values for  $k_q^{complex}$  and  $\tau^{complex}$ , this expression fits the negative curvature observed in the above luminescence quenching plots. Notably, control experiments show no luminescence of **10a**, alone, at the experimental irradiation and detection wavelengths. Admittedly, then, the values for " $k_q$ " that we determined from the linear-trimmed data using the Stern-Volmer relationship (a linear expression), cannot be taken as true  $k_q$  values for **10a** and used for quantitative comparison with other quenchers. However, given the thermodynamic favorability of oxidation of **10a** by **PC-I\***, any observation of luminescence quenching, regardless of the specific "mode," supports the claim that oxidation of **10a** by **PC-I\*** is feasible in this reaction.



**(4-(2,2-difluorovinyl)phenyl)(methyl)sulfane (10k)**

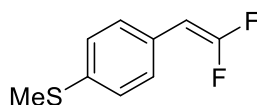

**Stern-Volmer Plot (PC-I) Full Data<sup>†</sup>**

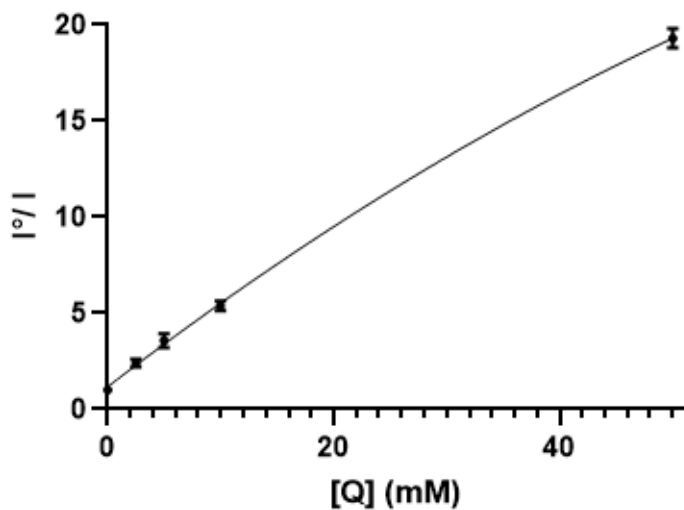

**Stern-Volmer Plot (PC-I) 0–5 mM**

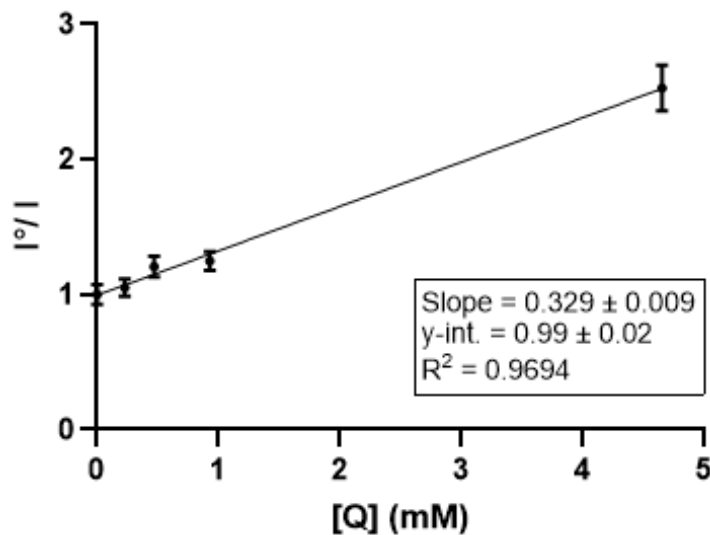

**Stern-Volmer Plot (PC-II)**

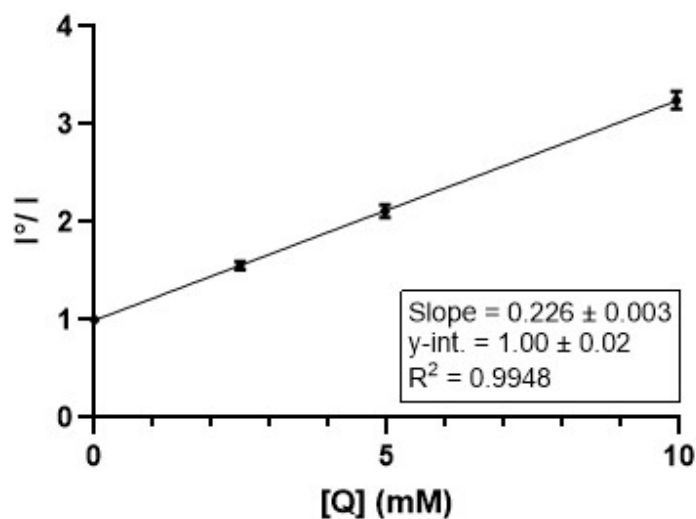

**Cyclic Voltammogram**

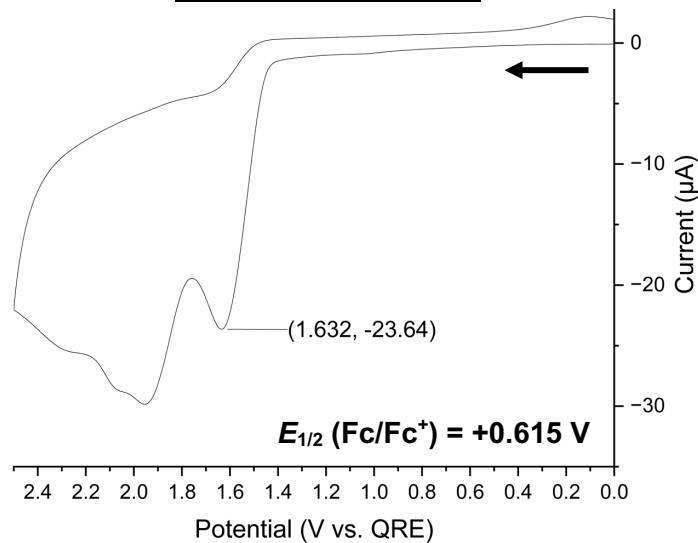

**Summarized Data**

$$E_p = +1.0 \text{ V}$$

$$k_q (\text{PC-I}) = (1.18 \pm 0.06) \times 10^9 \text{ M}^{-1} \cdot \text{s}^{-1}$$

$$k_q (\text{PC-II}) = (1.57 \pm 0.02) \times 10^{10} \text{ M}^{-1} \cdot \text{s}^{-1}$$

**4-(2,2-difluorovinyl)-1,1'-biphenyl (10n)**

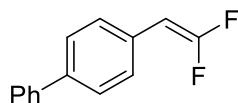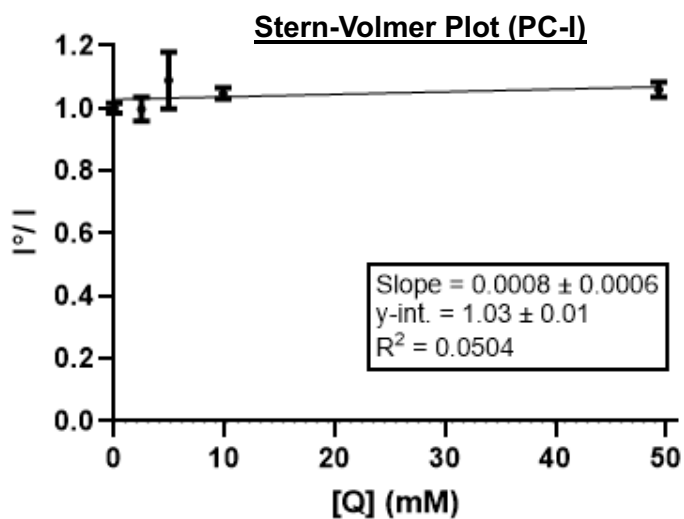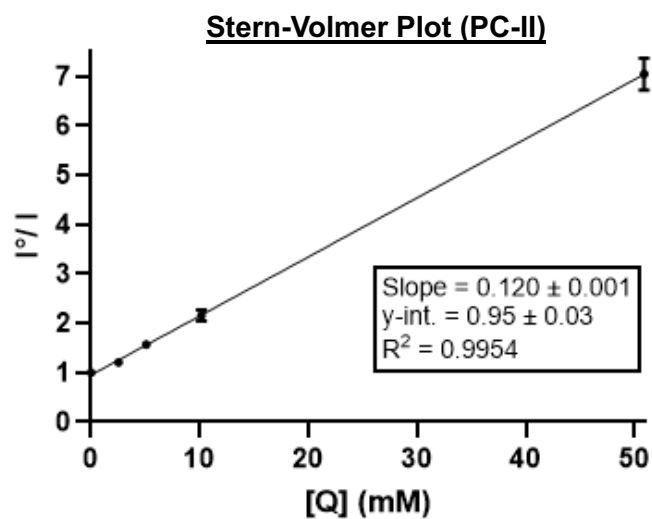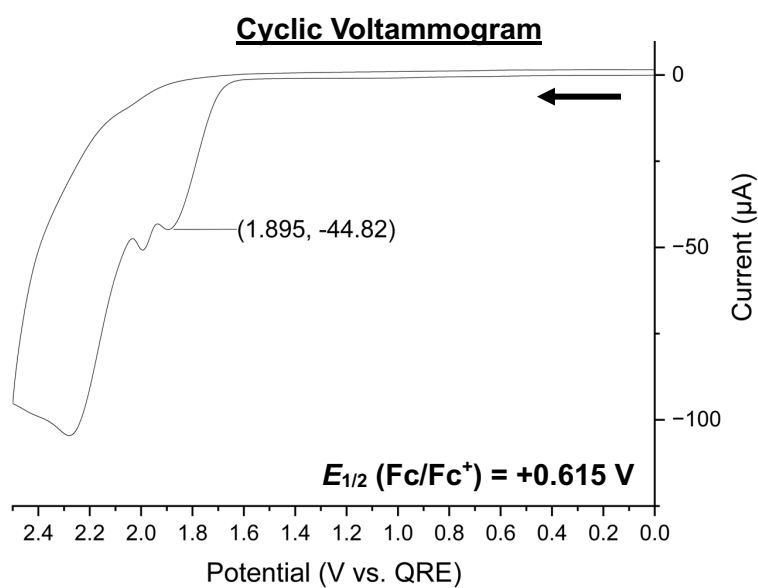

**Summarized Data**

$E_p = +1.3 \text{ V}$

$k_q (\text{PC-I}) = \text{no quenching}$

$k_q (\text{PC-II}) = (8.33 \pm 0.07) \times 10^9 \text{ M}^{-1} \cdot \text{s}^{-1}$

**1-(2,2-difluorovinyl)-2,4-dimethylbenzene (10o)**

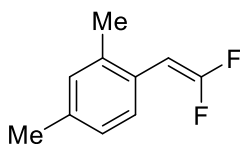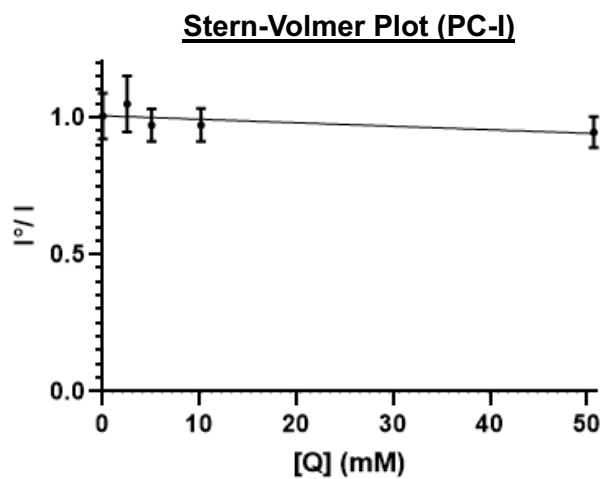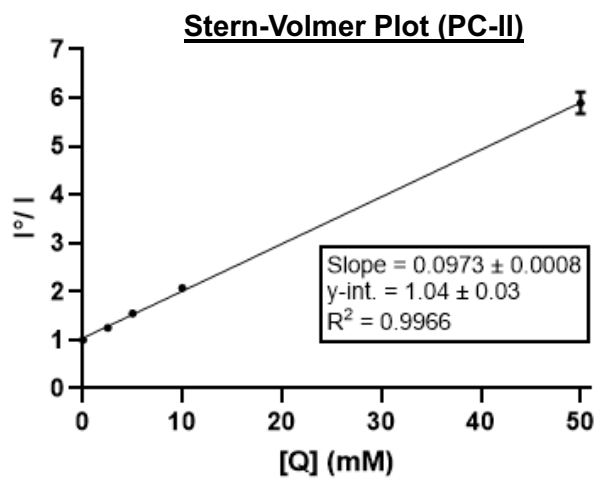

**Summarized Data**

$k_q(\text{PC-I}) = \text{no quenching}$

$k_q(\text{PC-II}) = (6.76 \pm 0.06) \times 10^9 \text{ M}^{-1} \cdot \text{s}^{-1}$

**4-(2,2-difluorovinyl)phenyl 4-methylbenzenesulfonate (10r)**

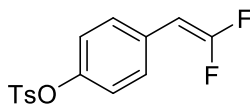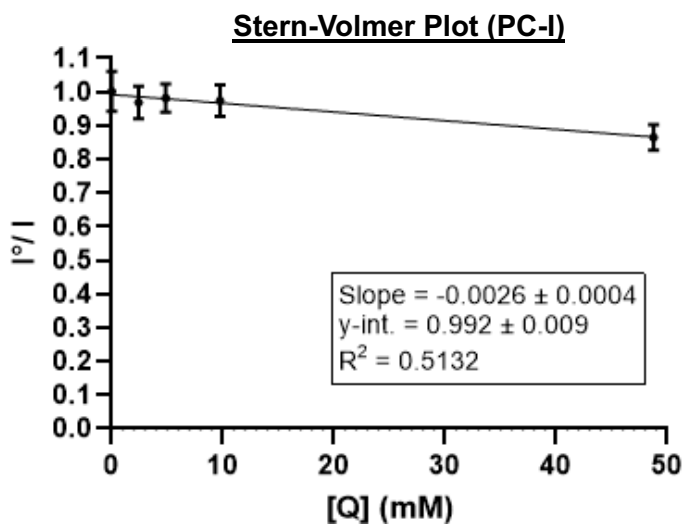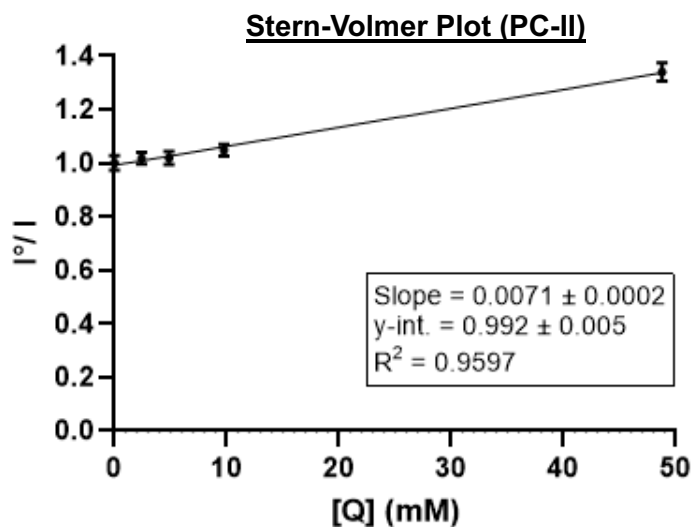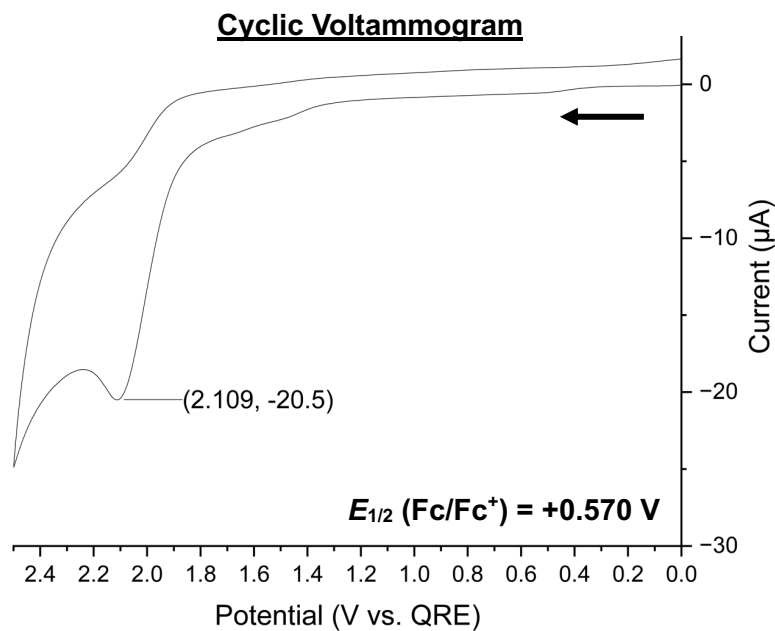

**Summarized Data**

$E_p = +1.5 \text{ V}$

$k_q (\text{PC-I}) = \text{no quenching}$

$k_q (\text{PC-II}) = (4.9 \pm 0.1) \times 10^8 \text{ M}^{-1} \cdot \text{s}^{-1}$

**4-(2,2-difluorovinyl)benzonitrile (**10t**)**

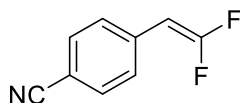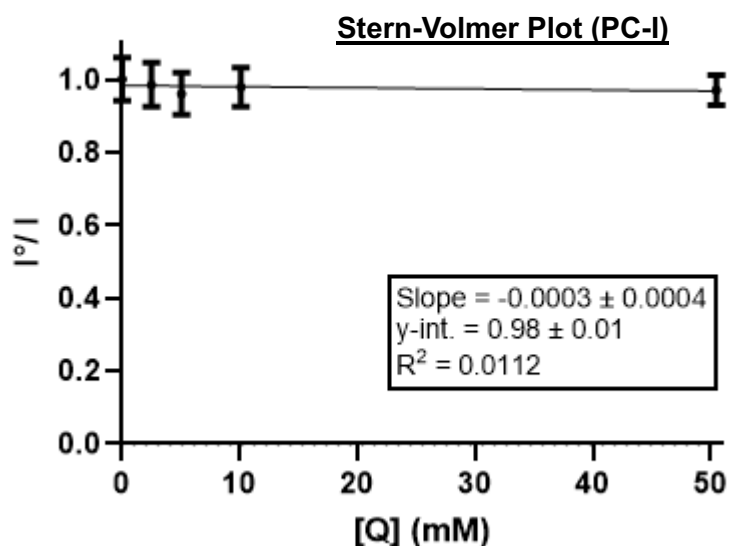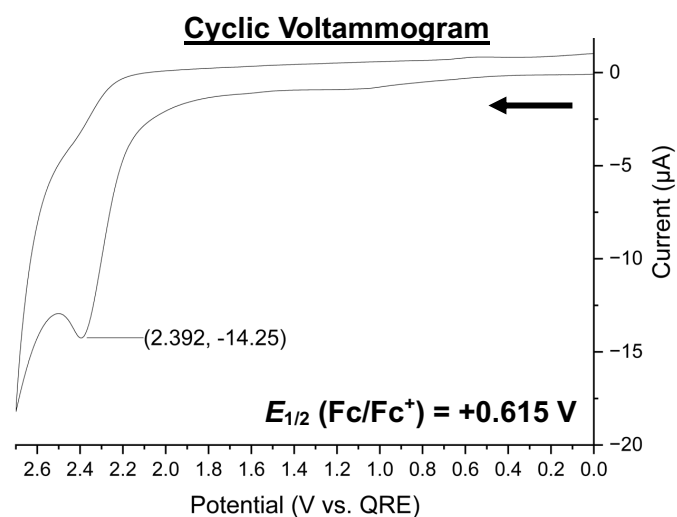

**Summarized Data**

$$E_p = +1.8 \text{ V}^{\dagger}$$

$k_q (\text{PC-I}) = \text{no quenching}$

$k_q (\text{PC-II})^{15} = \text{no quenching}$

<sup>†</sup>This measured oxidation potential of **10t** in DCE (+1.8 V) is significantly different from the potential in THF previously reported by our research group (+1.3 V).<sup>16</sup> Interestingly, the measured potential of **10a** did not change between DCE and THF.

## Benzimidazole

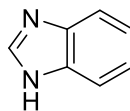

**Stern-Volmer Plot (PC-I)**

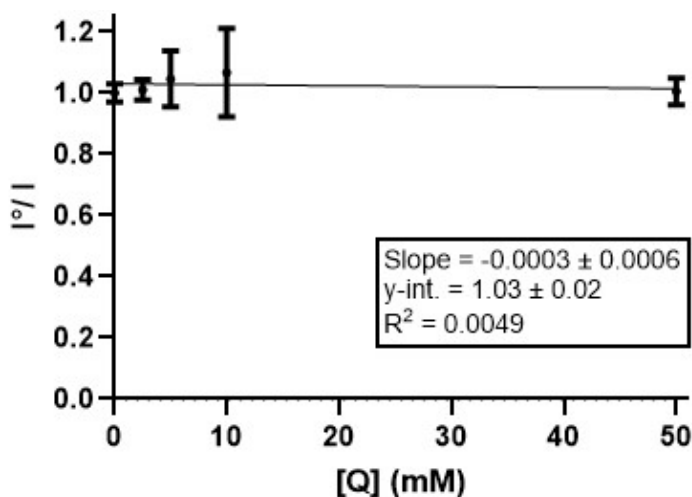

**Stern-Volmer Plot (PC-II)**

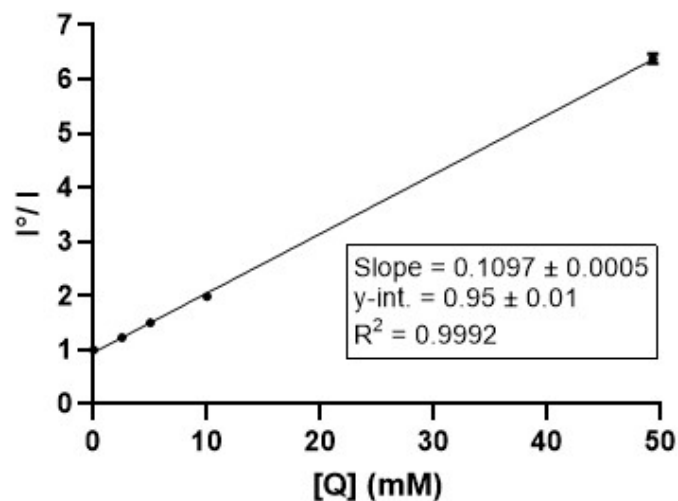

**Cyclic Voltammogram\***

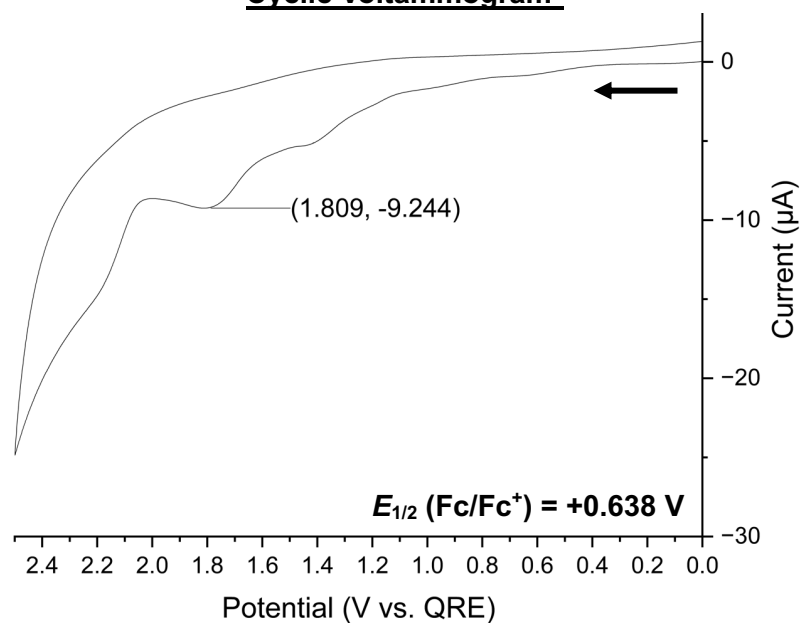

### Summarized Data

$$E_p = +1.1 \text{ V}$$

$$k_q (\text{PC-I}) = \text{no quenching}$$

$$k_q (\text{PC-II}) = (7.62 \pm 0.04) \times 10^9 \text{ M}^{-1} \cdot \text{s}^{-1}$$

\*The small, unlabeled peaks prior to the first labeled peak are from the degradation of a plastic syringe used to dispense DCE.

## Indazole

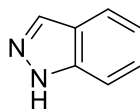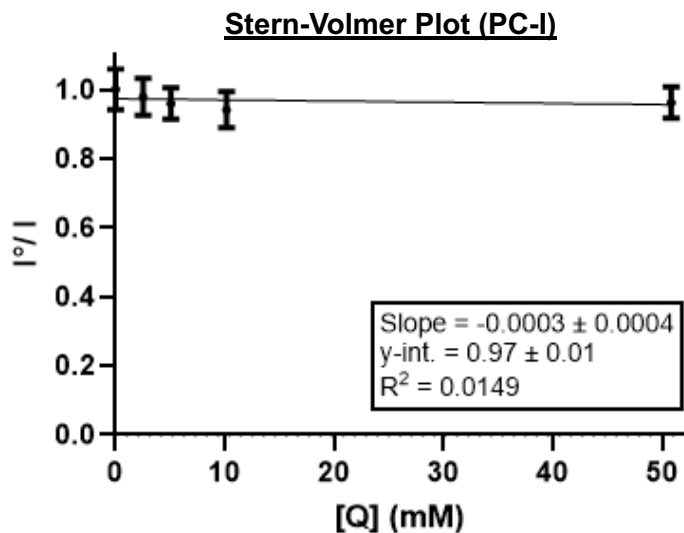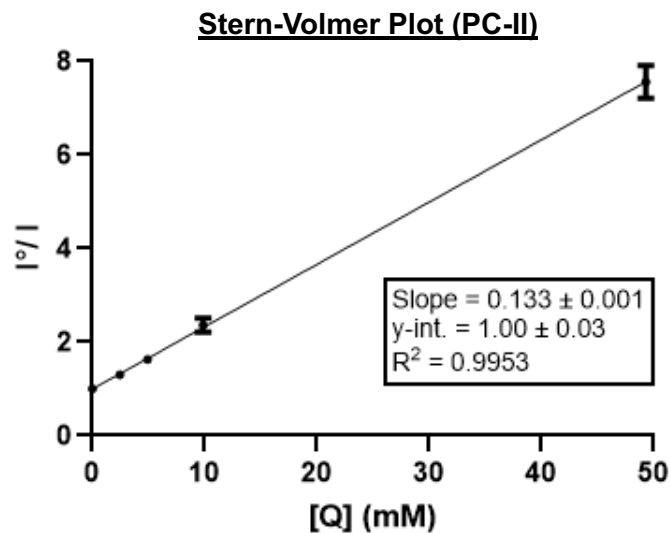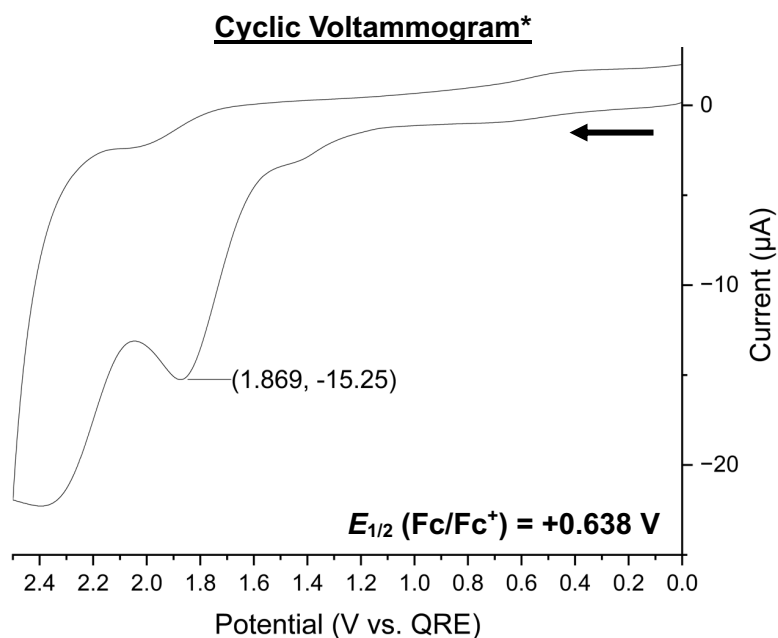

**Summarized Data**

$E_p = +1.2 \text{ V}$

$k_q (\text{PC-I}) = \text{no quenching}$

$k_q (\text{PC-II}) = (9.23 \pm 0.07) \times 10^9 \text{ M}^{-1} \cdot \text{s}^{-1}$

\*The small, unlabeled peaks prior to the first labeled peak are from the degradation of a plastic syringe used to dispense DCE.

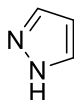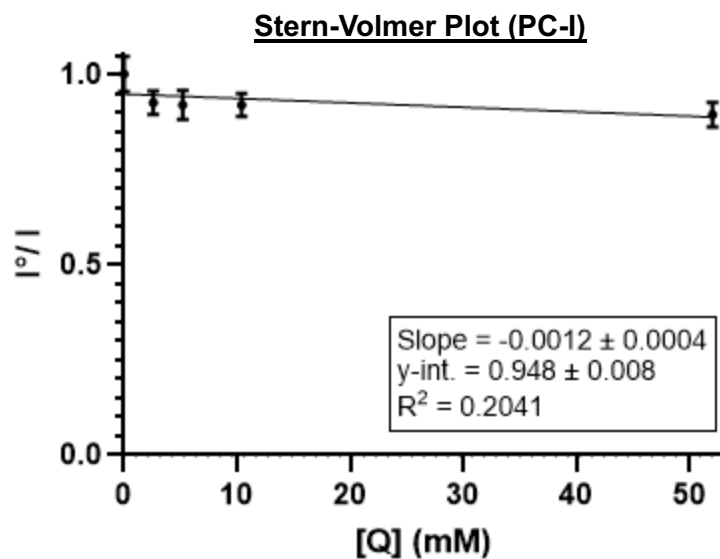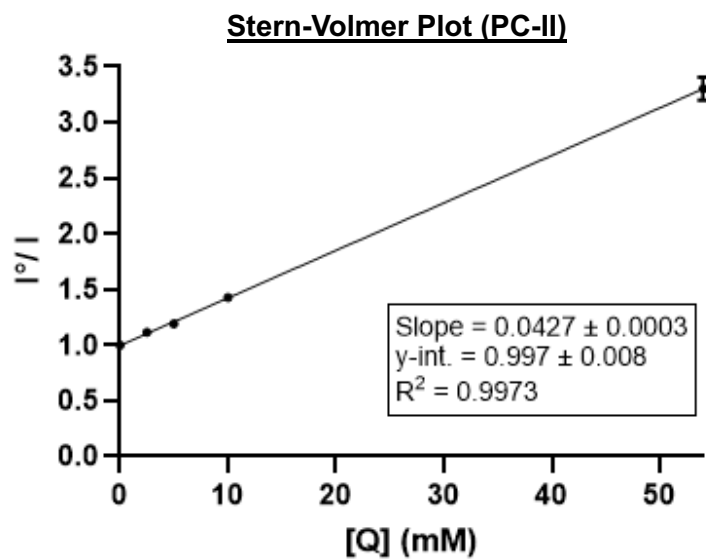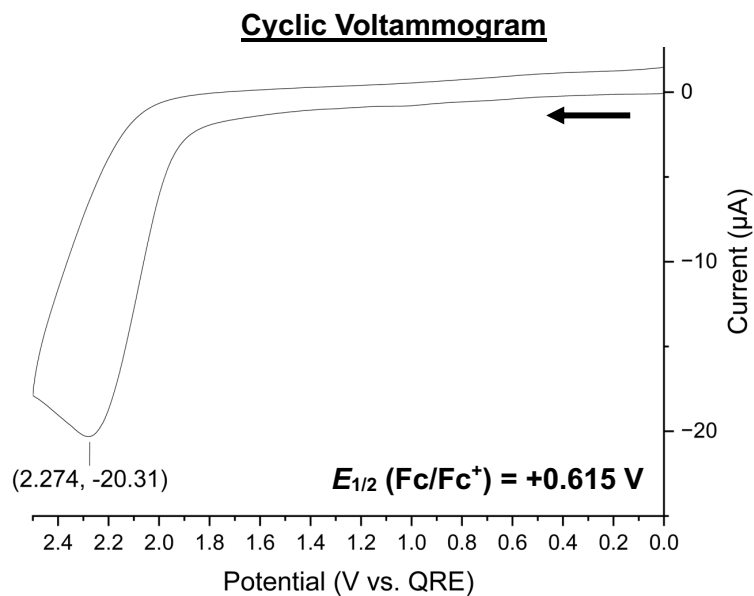

**Summarized Data**

$E_p = +1.6 \text{ V}$

$k_q (\text{PC-I}) = \text{no quenching}$

$k_q (\text{PC-II}) = (2.96 \pm 0.02) \times 10^9 \text{ M}^{-1} \cdot \text{s}^{-1}$



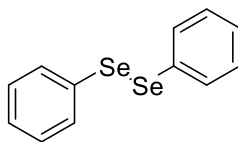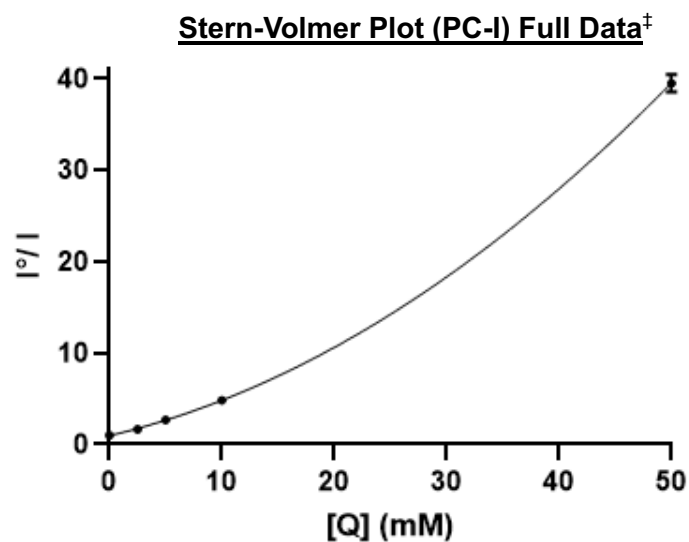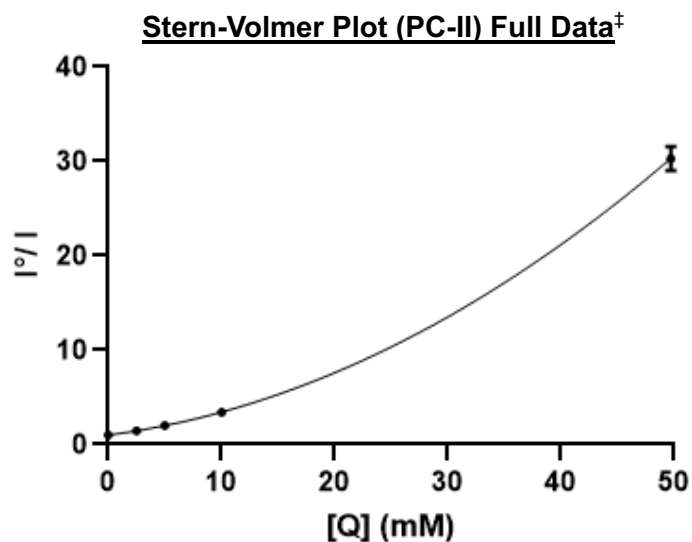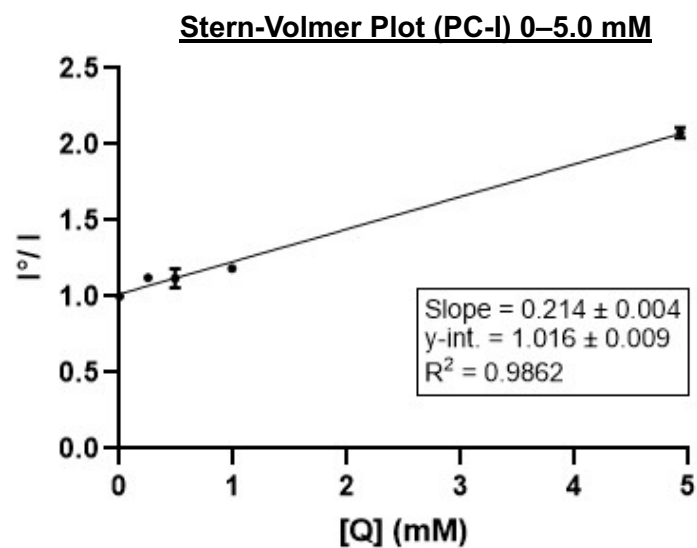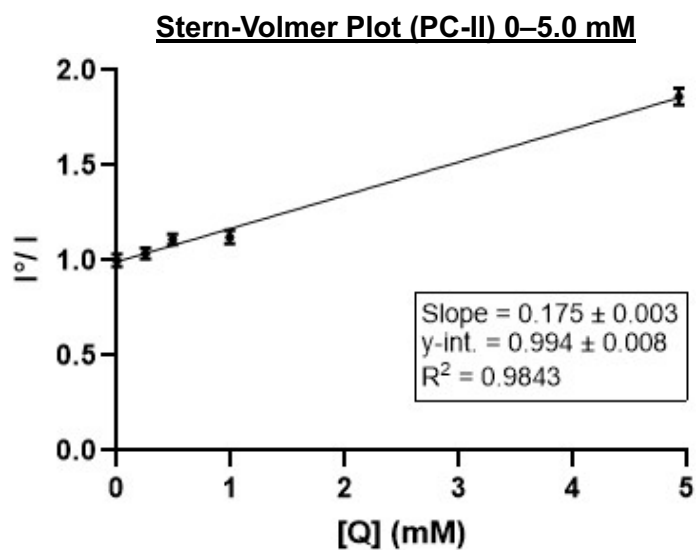

<sup>‡</sup>See explanation on S44

### Cyclic Voltammogram

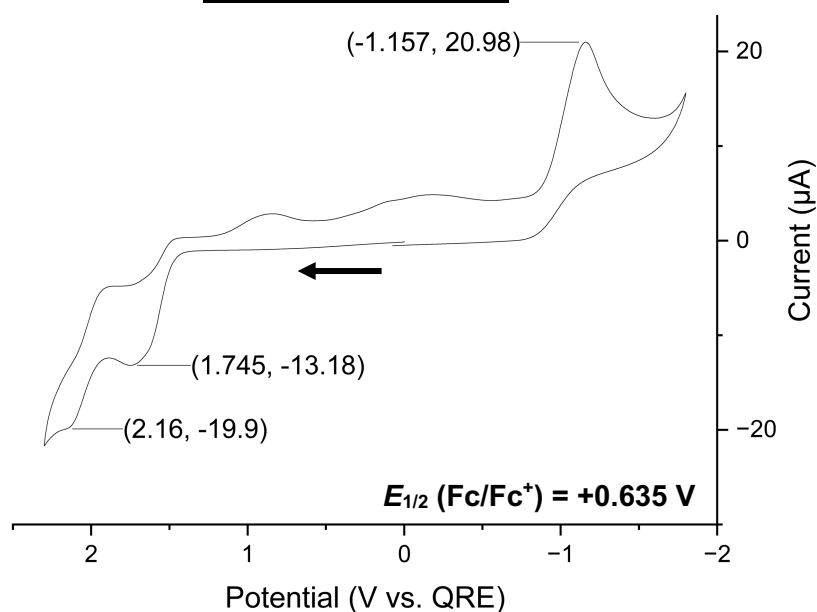

### Summarized Data

$$E_p (\text{ox}) = +1.1 \text{ V}$$

$$E_p (\text{red}) = -1.8 \text{ V}$$

$$k_q (\text{PC-I}) = (7.7 \pm 0.1) \times 10^8 \text{ M}^{-1} \cdot \text{s}^{-1} \ddagger$$

$$k_q (\text{PC-II}) = (1.22 \pm 0.02) \times 10^{10} \text{ M}^{-1} \cdot \text{s}^{-1} \ddagger$$

$\ddagger(\text{PhSe})_2$  displayed nonlinear luminescence quenching with positive curvature of both photocatalysts. One possible explanation for this data is that energy transfer between  $\text{PC}^*$  and  $(\text{PhSe})_2$  is occurring by static and dynamic mechanisms, simultaneously.<sup>20</sup> However, an alternative explanation that acknowledges and incorporates the intrinsic absorption of  $(\text{PhSe})_2$  at the experimental irradiation wavelength (420 nm) may be relevant in this case.<sup>21,22</sup> Specifically,  $(\text{PhSe})_2$  reduces the amount of light that reaches the ground state photocatalyst in a concentration-dependent manner, thus reducing the quantity of  $\text{PC}^*$  and amplifying the observed suppression of photocatalyst luminescence. This alternative luminescence reduction “mode” would contribute a unique relationship between luminescence reduction  $\left[\left(\frac{I^o}{I}\right)^{\text{absorption}}\right]$  and the concentration of  $(\text{PhSe})_2$  ( $[Q]$ ) with a proportionality constant  $C$  that is dependent on both the respective relationships between 1)  $[Q]$  and light transmittance and 2) irradiation intensity and photocatalyst luminescence:

$$\left(\frac{I^o}{I}\right)^{\text{abs.}} = 1 + C[Q] \quad (4)$$

The algebraic multiplication of this relationship by the Stern-Volmer equation (eq. 1) would lead to a quadratic expression that encompasses the combined effects of  $(\text{PhSe})_2$  on photocatalyst luminescence:<sup>20</sup>

$$\frac{I^o}{I} = 1 + (C + k_q \tau)[Q] + C k_q \tau [Q]^2 \quad (5)$$

Absent specific values for  $C$  and  $k_q$ , this expression fits the positive curvature observed in the above luminescence quenching plots. Admittedly, then, the values for “ $k_q$ ” that we determined from the linear-trimmed data using the Stern-Volmer relationship (a linear expression), cannot be taken as true  $k_q$  values and used for quantitative comparison with other quenchers. However, given the thermodynamic favorability of oxidation of  $(\text{PhSe})_2$  by either  $\text{PC-I}^*$  or  $\text{PC-II}^*$ , it is likely that one of the observed luminescence quenching contributors is indeed an electron transfer.

## 5.b. Cyclopropane Ring Opening

In the speculative reaction mechanism, we propose carbon-centered radical intermediates **15** and **16** (Scheme S1). The existence of these intermediates is supported by the ring-opened styrene **11s** as the sole, detected azole-coupled product when vinyl cyclopropyl *gem*-difluoroalkene **10s** reacted with pyrazole under both **PC-I** and **PC-II** catalysis.

### Experimental Procedure

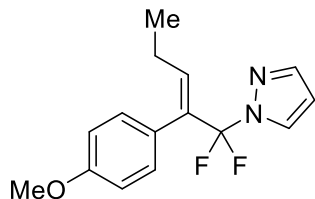

#### (E)-1-(1,1-difluoro-2-(4-methoxyphenyl)pent-2-en-1-yl)-1H-pyrazole (**11s**):

**PC-I:** Following general procedure C, *gem*-difluoroalkene **10s** (0.105 g, 0.500 mmol) was reacted with 1*H*-pyrazole (0.041 g, 0.60 mmol) in the presence of 1,2-diphenyldisilane (7.8 mg, 0.025 mmol) and [5,5'-bis(trifluoromethyl)-2,2'-bipyridine-*N1,N1'*]bis[3,5-difluoro-2-[5-(trifluoromethyl)-2-pyridinyl]-*N*]phenyl-C]iridium(III) hexafluorophosphate (28.6 mg, 0.0250 mmol) in dry DCE (2.0 mL) using a 40 W 427 nm LED cooled by a fan for 14 h. The material was isolated according to the general procedure and purified by normal-phase flash chromatography using EtOAc and hexanes (0→5% EtOAc) to furnish a single diastereomer of desired product **11s** as a colorless oil (0.106 g, 76%). <sup>1</sup>H NMR (800 MHz, CDCl<sub>3</sub>) δ 7.66 (s, 1H), 7.63 (d, *J* = 2.6 Hz, 1H), 6.97 (d, *J* = 8.7 Hz, 2H), 6.80 (d, *J* = 8.7 Hz, 2H), 6.40 (t, *J* = 7.5 Hz, 1H), 6.27 (t, *J* = 2.2 Hz, 1H), 3.76 (d, *J* = 1.8 Hz, 3H), 2.02 (p, *J* = 7.5 Hz, 2H), 0.99 (t, *J* = 7.6 Hz, 3H). <sup>13</sup>C{<sup>1</sup>H} NMR (201 MHz, CDCl<sub>3</sub>) δ 159.4, 141.9, 138.7 (t, *J* = 6.3 Hz), 132.4 (t, *J* = 26.4 Hz), 131.1, 128.4, 125.5, 118.0 (t, *J* = 252.7 Hz), 113.6, 106.8, 55.2, 22.2, 13.5. <sup>19</sup>F NMR (470 MHz, CDCl<sub>3</sub>) δ -80.24 (s, 2F). HRMS (ESI)<sup>+</sup> *m/z*: [M + H]<sup>+</sup> calc'd for C<sub>15</sub>H<sub>17</sub>F<sub>2</sub>N<sub>2</sub>O<sup>+</sup> 279.1303, found 279.1311. *E* stereochemical assignment is supported by 2D NMR data (see S189–194).

**PC-II:** Following general procedure D, *gem*-difluoroalkene **10s** (0.105 g, 0.500 mmol) was reacted with 1*H*-pyrazole (0.041 g, 0.60 mmol) in the presence of 1,2-diphenyldisilane (7.8 mg, 0.025 mmol) and 9-mesityl-3,6-di-*tert*-butyl-10-phenylacridinium tetrafluoroborate (8.6 mg, 0.015 mmol) in dry PhMe (2.0 mL) using a 40 W 427 nm LED cooled by a fan for 14 h. The material was isolated according to the general procedure and purified by normal-phase flash chromatography using EtOAc and hexanes (0→5% EtOAc) to obtain a mixture of desired product **11s** and an unidentified impurity. The resulting mixture was further purified by preparative TLC (7% EtOAc in Hexanes) to furnish a single diastereomer of desired product **11s** as a colorless oil (0.105 g, 76%). The isolated <sup>1</sup>H and <sup>19</sup>F NMR spectra match the above data.

## 5.c. Light On/Off Experiments

In the speculative reaction mechanism (Scheme S1), we propose that, upon completion of a single photocatalytic cycle, radical intermediate **16** is converted to product **11**, and selenyl radical **17** does not engage in further on-cycle reactivity. Therefore, starting material consumption and product formation should not occur when the LED is turned off. Accordingly, light on/off experiments verified that no significant reaction progression occurred in dark periods when **PC-I** or **PC-II** were employed to couple pyrazole with *gem*-difluoroalkene **10n** by either general procedure C or D, respectively.

### Experimental Procedure

**PC-I:** With slight modification to general procedure C, *gem*-difluoroalkene **10n** (0.54 g, 0.25 mmol) was reacted with 1*H*-pyrazole (0.020 g, 0.30 mmol) in the presence of 1,2-diphenyldisilane (3.9 mg, 0.013 mmol) and [5,5'-bis(trifluoromethyl)-2,2'-bipyridine-*N1,N1'*]bis[3,5-difluoro-2-[5-(trifluoromethyl)-2-pyridinyl]-*N*]phenyl-

C[iridium(III) hexafluorophosphate (14.3 mg, 0.0130 mmol) in dry DCE (1.0 mL) under an argon balloon. (Trifluoromethyl)benzene (31  $\mu$ L, 0.024 mmol) was added to the initial reaction mixture to serve as an internal standard for  $^{19}\text{F}$  NMR analysis. The reaction was exposed to either 40 W 427 nm LED irradiation or covered from outside light in an alternating pattern for a total of 4 h. Specifically, the light was kept on for 30 min, then off for 30 min, on for 30 min, off for 30 min, on for 30 min, off for 30 min, and finally on for 60 min. A 5  $\mu$ L aliquot was withdrawn *via* syringe and analyzed by  $^{19}\text{F}$  NMR at the end of each of the aforementioned time periods. The data in the graph below was generated from  $^{19}\text{F}$  NMR analysis of triplicate experiments, with error bars representing standard deviation.

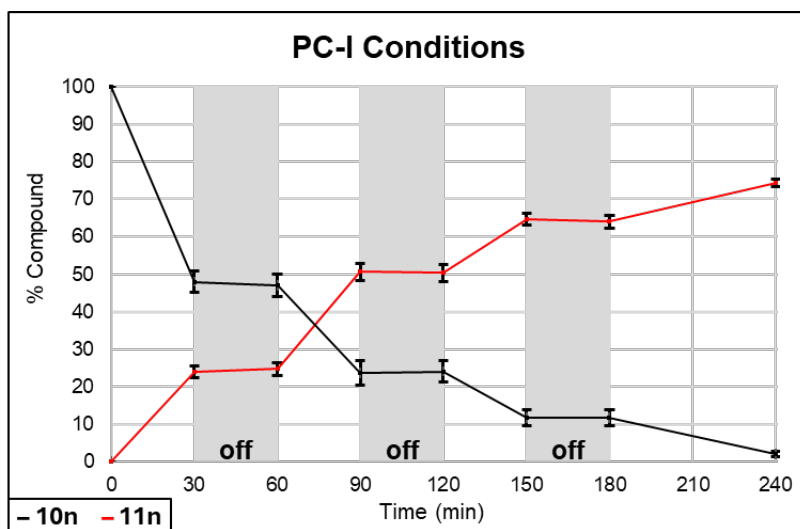

**PC-II:** With slight modification to general procedure D, *gem*-difluoroalkene **10n** (0.54 g, 0.25 mmol) was reacted with 1*H*-pyrazole (0.020 g, 0.30 mmol) in the presence of 1,2-diphenyldisilane (3.9 mg, 0.013 mmol) and 9-mesityl-3,6-di-*tert*-butyl-10-phenylacridinium tetrafluoroborate (4.3 mg, 0.0080 mmol) in dry PhMe (1.0 mL) under an argon balloon. (Trifluoromethyl)benzene (31  $\mu$ L, 0.024 mmol) was added to the initial reaction mixture to serve as an internal standard for  $^{19}\text{F}$  NMR analysis. The reaction was exposed to either 40 W 427 nm LED irradiation or covered from outside light in an alternating pattern for a total of 4 h. Specifically, the light was kept on for 30 min, then off for 30 min, on for 30 min, off for 30 min, on for 30 min, off for 30 min, and finally on for 60 min. A 5  $\mu$ L aliquot was withdrawn *via* syringe and analyzed by  $^{19}\text{F}$  NMR at the end of each of the aforementioned time periods. The data in the graph below was generated from  $^{19}\text{F}$  NMR analysis of triplicate experiments, with error bars representing standard deviation.

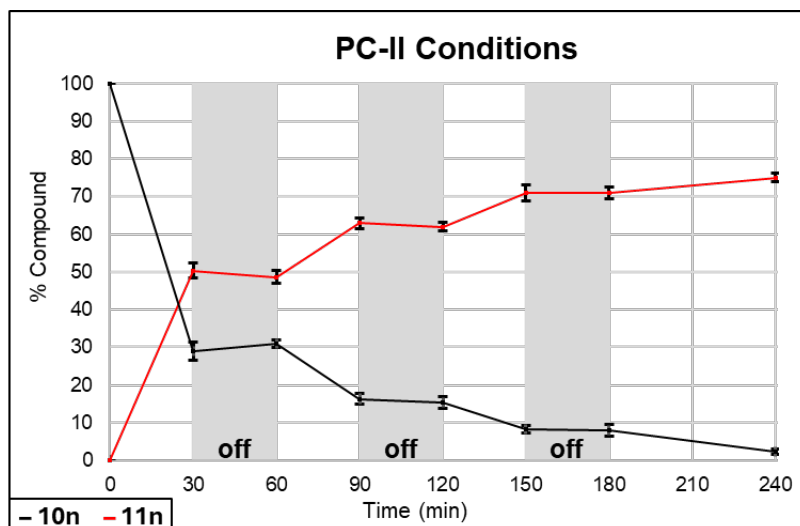

## 5.d. Alternative Hypotheses

### 5.d.i. Azole Radical Addition

**Scheme S2.** A possible mechanism initiated by the generation of azole radicals.

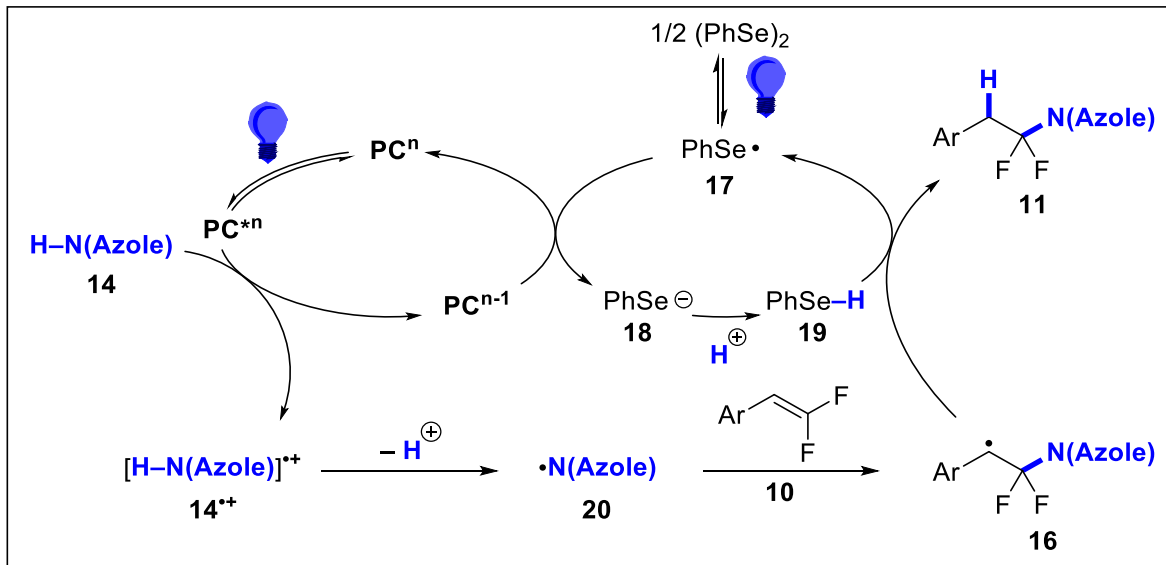

An alternative mechanism that could explain both the formation of intermediate **16** and a lack of reaction progression in the dark might involve attack of an azole-based radical (**20**) into the neutral gem-difluoroalkene (**10**, Scheme S2). Further, this hypothesis is supported by photophysical data that suggests oxidation of azoles (**14**→**14**<sup>++</sup>) is possible in this system: pyrazole, indazole, and benzimidazole quench the luminescence of **PC-II** (but not **PC-I**) at a rate comparable to both *gem*-difluorostyrenes and (PhSe)<sub>2</sub> (see S33–44), and the measured oxidation potentials of these azoles (benzimidazole:  $E_{p,ox} = +1.1$  V; indazole:  $E_{p,ox} = +1.2$  V; pyrazole:  $E_{p,ox} = +1.6$  V) are comparable the excited state reduction potentials of **PC-I** and **PC-II** (see S39–42).

To test this hypothesis, a series of radical trapping agents were employed (Table S7). A pyrazole cyclization adduct was detected when diethyl 2,2-diallylmalonate (entry 4) and *N,N*-diallyl-4-methylbenzenesulfonamide (entry 6) were reacted in the presence of **PC-II**. However, conversion in the *gem*-difluoroalkene hydroazolation reaction was not inhibited (compare to entry 2). Additionally, these pyrazole cyclization adducts were not observed for reactions under **PC-I** catalysis (entries 3 and 5), and likewise, conversion was unaffected (compare to entry 1). Taken together, these results suggest that while **PC-II** catalysis does generate some azole radicals, they are unlikely to possess a significant mechanistic role in the desired *gem*-difluoroalkene hydroazolation process.

However, 2,6-di-*tert*-butyl-4-methylphenol (BHT) slightly inhibited conversion (compare entries 1–2 with 7–8), and a BHT-pyrazole adduct was detected by LCMS (ESI<sup>+</sup>) and APCI<sup>+</sup> mass spectrometry. Notably, BHT has been previously reported as a pyrazole radical trapping reagent.<sup>23–25</sup> However, this adduct was also detected in the absence of light or photocatalyst (entries 9–10), which suggests that the mechanism responsible for the formation of the BHT-pyrazole adduct is not relevant to the *gem*-difluoroalkene hydroazolation reaction. Consumption of pyrazole by this off-cycle reaction with BHT may explain the conversion inhibition observed in entries 7–8.

**Table S7.** Pyrazole radical trapping experiments.

| <div> </div>    |                          |                                                                                                                                          |                  |                     |                |
|-----------------|--------------------------|------------------------------------------------------------------------------------------------------------------------------------------|------------------|---------------------|----------------|
| entry           | radical trapping reagent | hypothetical adduct                                                                                                                      | photocat.        | % Conversion<br>10n | % Yield<br>11n |
| 1 <sup>a</sup>  | none                     | N.A.                                                                                                                                     | PC-I             | >99                 | 93             |
| 2 <sup>b</sup>  | none                     | N.A.                                                                                                                                     | PC-II            | >99                 | 83             |
| 3 <sup>c</sup>  |                          |                                                                                                                                          | PC-I             | >99                 | 91             |
| 4 <sup>c</sup>  | “                        | not detected by LCMS (ESI <sup>+</sup> ) or APCI <sup>+</sup><br>above adduct detected by LCMS (ESI <sup>+</sup> ) and APCI <sup>+</sup> | PC-II            | >99                 | 82             |
| 5 <sup>d</sup>  |                          |                                                                                                                                          | PC-I or<br>PC-II | >99                 | 88             |
| 6 <sup>d</sup>  | “                        | not detected by LCMS (ESI <sup>+</sup> ) or APCI <sup>+</sup><br>above adduct detected by LCMS (ESI <sup>+</sup> ) and APCI <sup>+</sup> | PC-II            | >99                 | 79             |
| 7 <sup>e</sup>  |                          |                                                                                                                                          | PC-I             | 81                  | 70             |
| 8 <sup>e</sup>  | “                        | detected by LCMS (ESI <sup>+</sup> ) and APCI <sup>+</sup><br>above adduct detected by LCMS (ESI <sup>+</sup> ) and APCI <sup>+</sup>    | PC-II            | 96                  | 85             |
| 9 <sup>f</sup>  | “                        | above adduct detected by LCMS (ESI <sup>+</sup> ) and APCI <sup>+</sup>                                                                  | PC-I             | N.A.                | N.A.           |
| 10 <sup>g</sup> | “                        | above adduct detected by LCMS (ESI <sup>+</sup> ) and APCI <sup>+</sup>                                                                  | none             | N.A.                | N.A.           |

<sup>a</sup>*gem*-Difluorostyrene **10n** (50 μmol), pyrazole (1.2 equiv.), 1,2-diphenyldisilane (5 mol%), {Ir[dF(CF<sub>3</sub>)ppy]<sub>2</sub>-(5,5'-dCF<sub>3</sub>bpy)}PF<sub>6</sub> (**PC-I**, 5 mol%), in DCE (0.2 mL) irradiated with a 40 W 427 nm LED under an atmosphere of N<sub>2</sub> at 30 °C for 15.5 h. <sup>b</sup>*gem*-Difluorostyrene **10n** (50 μmol), pyrazole (1.2 equiv.), 1,2-diphenyldisilane (5 mol%), 9-mesityl-3,6-di-*tert*-butyl-10-phenylacridinium tetrafluoroborate (**PC-II**, 3 mol%), in PhMe (0.2 mL) irradiated with a 40 W 427 nm LED under an atmosphere of N<sub>2</sub> at 30 °C for 15.5 h. <sup>c</sup>Conditions (a) or (b) plus diethyl 2,2-diallylmalonate (1.0 equiv.). <sup>d</sup>Conditions (a) or (b) plus *N,N*-diallyl-4-methylbenzenesulfonamide (1.0 equiv.). <sup>e</sup>Conditions (a) or (b) plus 2,6-di-*tert*-butyl-4-methylphenol (1.0 equiv.). <sup>f</sup>Conditions (a), but in the dark instead of under LED irradiation. <sup>g</sup>Conditions (a), but without **PC-I**.

### 5.d.ii. (PhSe)<sub>2</sub> Redox Mediation

**Scheme S3.** A possible mechanism involving *gem*-difluoroalkene oxidation mediation by (PhSe)<sub>2</sub>.

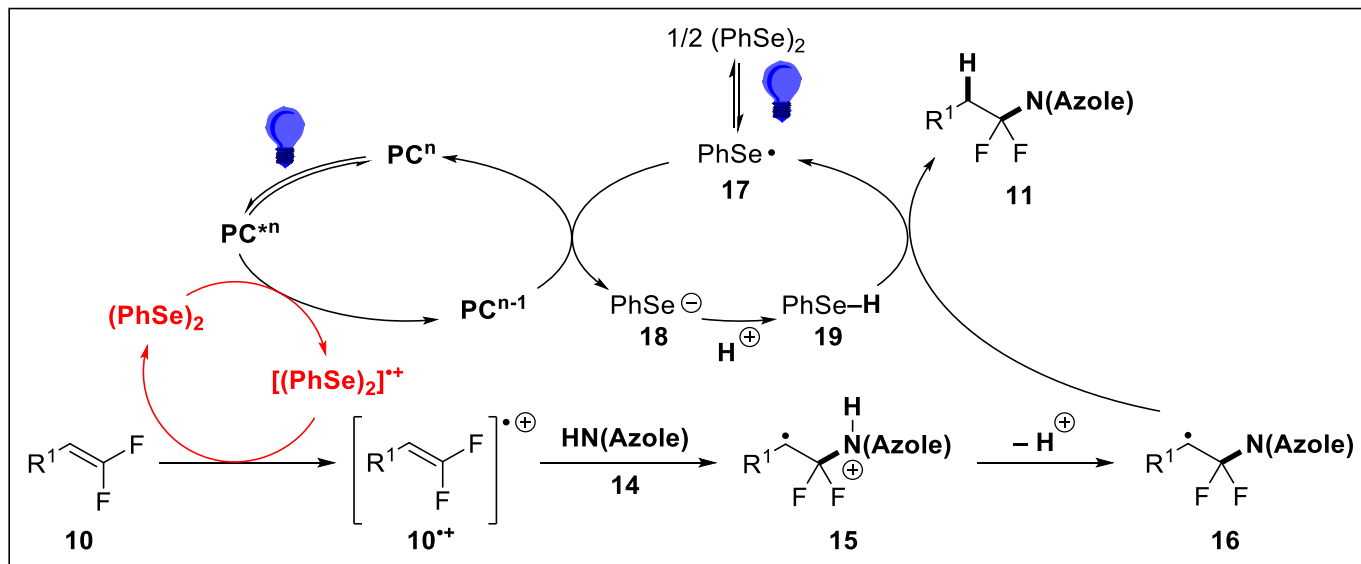

From the main text: "...in contrast to this general correlation between luminescence of photocatalyst quenching and *gem*-difluorostyrene conversion, *gem*-difluorostyrenes **10n** ( $E_p = +1.3$  V) and **10o** only quench the luminescence of **PC-II** despite reacting successfully under both **PC-I** and **PC-II** catalysis (entries 5 and 6). In these reactions, only (PhSe)<sub>2</sub> quenched **PC-I** luminescence..." An alternate mechanism consistent with this data might involve redox mediation by (PhSe)<sub>2</sub> (Scheme S3). Specifically, oxidation of (PhSe)<sub>2</sub> by **PC-I**\* might form [(PhSe)<sub>2</sub>]<sup>2+</sup>, which could then oxidize *gem*-difluoroalkene **10** to generate 10<sup>2+</sup>. If true, alternate photocatalysts that are capable of oxidizing (PhSe)<sub>2</sub>, but not *gem*-difluorostyrenes **10n** and **10o**, should be able to facilitate product formation when used in place of **PC-I**.

To test this hypothesis, an alternate photocatalyst, {Ir[dF(CF<sub>3</sub>)ppy]<sub>2</sub>-(dtbbpy)}PF<sub>6</sub> (**PC-III**;  $E_{1/2}(\text{PC-III}^{*III}/\text{PC-III}^{II}) = +0.83$  V;  $E_{1/2}(\text{PC-III}^{*III}/\text{PC-III}^{IV}) = -1.27$  V)<sup>26</sup> was chosen due to its potential to oxidize (PhSe)<sub>2</sub> selectively over *gem*-difluorostyrene **10n**. Specifically, while (PhSe)<sub>2</sub> and **10n** both quench the luminescence of **PC-III**\* (Chart S2), an analysis of relevant redox potentials reveals that the mechanisms of energy transfer to both quenchers are likely to be an oxidation of or triplet energy transfer to (PhSe)<sub>2</sub> ( $E_{p,ox} = +1.1$  V;  $E_{p,red} = -1.8$  V) and a reduction of or triplet energy transfer to **10n** ( $E_{p,ox} = +1.3$  V;  $E_{p,red} = -1.18$  V),<sup>27</sup> respectively. Additional support for the ability of **PC-III** to oxidize (PhSe)<sub>2</sub> to form [(PhSe)<sub>2</sub>]<sup>2+</sup> comes from the efficacy of **PC-III** in a previously reported reaction<sup>28</sup> that is presumed facilitated by a photocatalyst-generated [(PhSe)<sub>2</sub>]<sup>2+</sup> intermediate (entry 1, Table S8).

Experimentally, a control reaction with *gem*-difluorostyrene **10n** in the presence of **PC-III** confirmed that **PC-III** was not capable of reacting **10n** with pyrazole in the absence of (PhSe)<sub>2</sub> (entry 2, Table S9). However, the introduction of (PhSe)<sub>2</sub> did not rescue conversion in the reaction of **10n** (entry 3), which suggests that *gem*-difluoroalkene oxidation mediation by (PhSe)<sub>2</sub> was not feasible in this reaction.

Importantly, control reactions with *gem*-difluorostyrene **10a** ( $E_{p,ox} = +1.0$  V) confirmed that **PC-III** was a competent photocatalyst in this system when reacting a *gem*-difluorostyrene capable of donating an electron to **PC-III**\* (Chart S2), as **10a** successfully reacted with pyrazole in either the absence or presence of (PhSe)<sub>2</sub> (entries 4 and 5, Table S9).

Chart S2. PC-III luminescence quenching data.

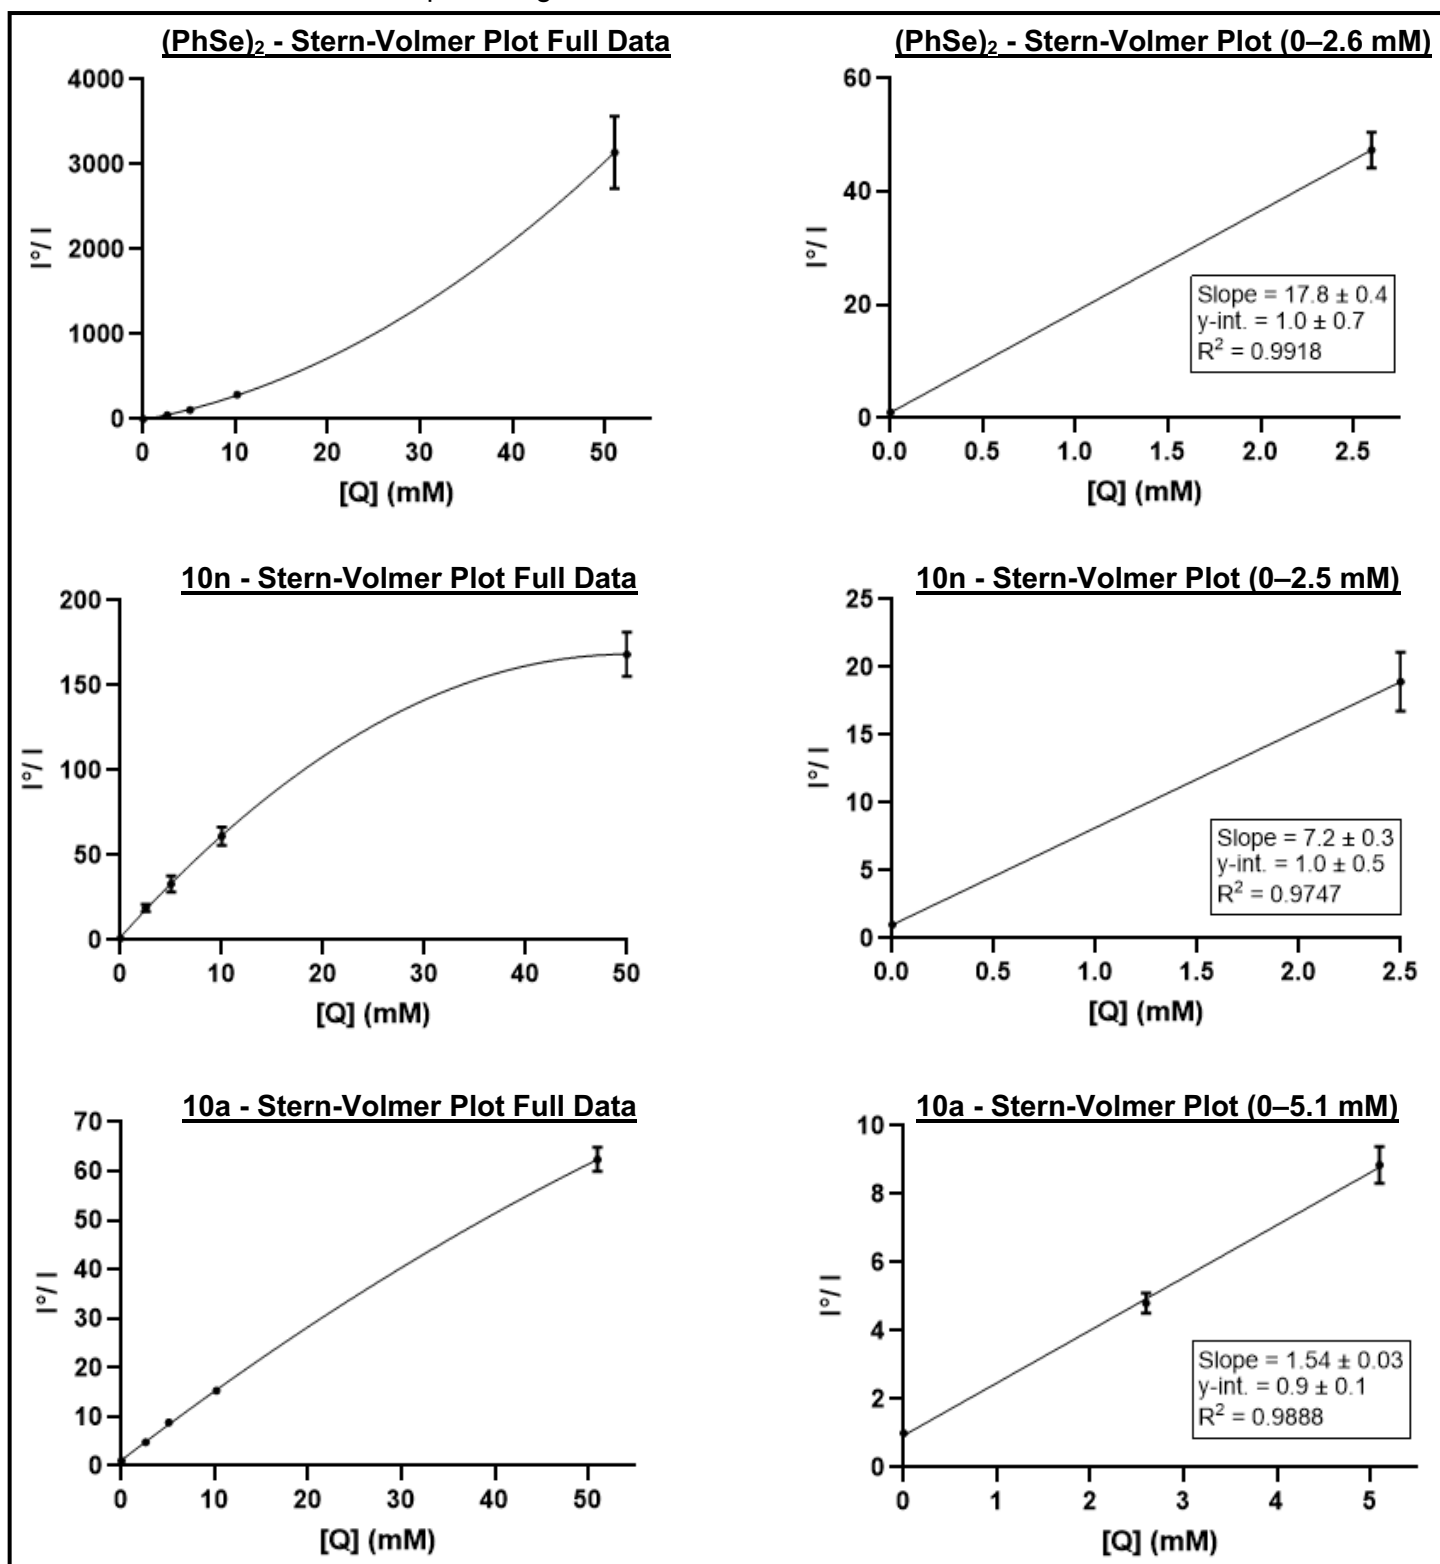

Experiments were performed according the luminescence quenching experimental procedure (S29–30), but an excitation wavelength of 400 nm and emission detection wavelength of 470 nm were used.<sup>26</sup>



**Table S8.** The ability of **PC-III**, **I**, and **II** to generate  $[(\text{PhSe})_2]^{++}$  in a previously reported reaction.<sup>28</sup>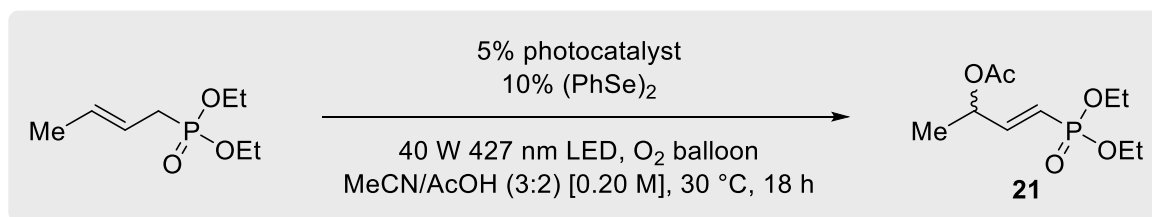

| entry | photocatalyst | % yield <b>21</b> |
|-------|---------------|-------------------|
| 1     | <b>PC-III</b> | 64                |
| 2     | <b>PC-I</b>   | 52                |
| 3     | <b>PC-II</b>  | 76                |

One-dram vials with magnetic stir bars were charged with diethyl (*E*)-but-2-en-1-ylphosphonate (19.2 mg, 100  $\mu\text{mol}$ ), 1,2-diphenyldisilane (3.1 mg, 10  $\mu\text{mol}$ ), and either  $\{\text{Ir}[\text{dF}(\text{CF}_3)\text{ppy}]_2\text{-(dtbbpy)}\}\text{PF}_6$  (**PC-III**, 5.6, 5.0  $\mu\text{mol}$ ),  $\{\text{Ir}[\text{dF}(\text{CF}_3)\text{ppy}]_2\text{-(5,5'-dCF}_3\text{bpy)}\}\text{PF}_6$  (**PC-I**, 5.7 mg, 5.0  $\mu\text{mol}$ ), or 9-mesityl-3,6-di-*tert*-butyl-10-phenylacridinium tetrafluoroborate (**PC-II**, 2.9 mg, 5.0  $\mu\text{mol}$ ). MeCN/AcOH (3:2, 0.50 mL) was added to the vials, and they were then sealed with PTFE-lined septa and placed under an O<sub>2</sub> balloon. The reactions were then irradiated by a 40 W 427 nm LED lamp cooled by a fan (30 °C) for 18 h. Upon completion, solvent was removed from the vials *in vacuo*. The resulting residues were resuspended in CDCl<sub>3</sub> (2 mL), and an internal standard of 2-(trimethylsilyl)ethan-1-ol (20.0  $\mu\text{L}$ , 140  $\mu\text{mol}$ ) was mixed into each vial. Aliquots of the reaction mixtures were subsequently transferred to NMR tubes and analyzed by <sup>1</sup>H NMR. Spectra were baseline corrected, phased, and integrated using MestReNova. Yields in the table represent crude yields as determined by comparative integration of the internal standard 2-(trimethylsilyl)ethan-1-ol methyl peak and the product **21** methine proton peak. Product **21** mass was independently confirmed by LCMS (ESI<sup>+</sup>) analysis. <sup>1</sup>H NMR (500 MHz, CDCl<sub>3</sub>): **21**  $\delta$  6.70 (ddd, *J* = 22.5, 17.2, 4.4 Hz), 5.81 (ddd, *J* = 19.1, 17.2, 1.7 Hz), 5.47–5.41 (m), 4.12–4.03 (m), 2.08 (s), 1.36–1.30 (m); 2-(trimethylsilyl)ethan-1-ol  $\delta$  3.75–3.71 (m), 0.98–0.93 (m), 0.01 (s); [ns = 32; D1 = 2 s].

**Table S9.** Exploration of (PhSe)<sub>2</sub> redox mediation under the hydroazolation conditions.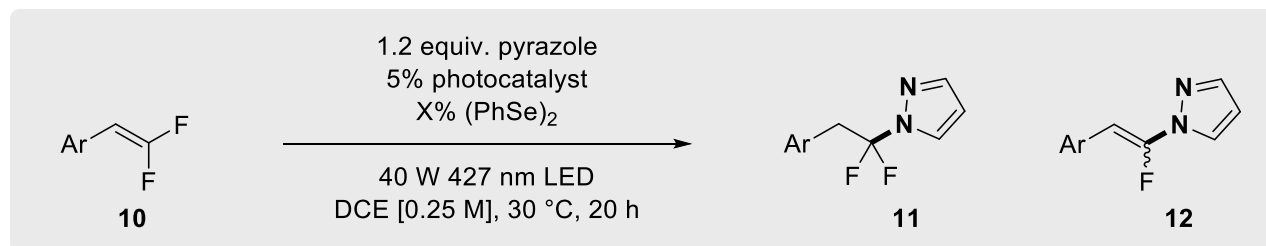

| entry | difluorostyrene | photocatalyst | % (PhSe) <sub>2</sub> | % conv. <b>10</b> | % yield <b>11</b> | % yield <b>12</b> |
|-------|-----------------|---------------|-----------------------|-------------------|-------------------|-------------------|
| 1     | <b>10n</b>      | <b>PC-I</b>   | 5                     | >99               | 93                | 0                 |
| 2     | <b>10n</b>      | <b>PC-III</b> | 5                     | 0                 | 0                 | 0                 |
| 3     | <b>10n</b>      | <b>PC-III</b> | 0                     | 1                 | 0                 | 0                 |
| 4     | <b>10a</b>      | <b>PC-III</b> | 5                     | >99               | 71                | 10                |
| 5     | <b>10a</b>      | <b>PC-III</b> | 0                     | 38                | <1                | 30                |

Reaction conditions: *gem*-difluorostyrene **10n** or **10a** (50  $\mu\text{mol}$ ), pyrazole (1.2 equiv.), 1,2-diphenyldisilane (5 or 0 mol%), and either  $\{\text{Ir}[\text{dF}(\text{CF}_3)\text{ppy}]_2\text{-(5,5'-dCF}_3\text{bpy)}\}\text{PF}_6$  (**PC-I**, 5 mol%) or  $\{\text{Ir}[\text{dF}(\text{CF}_3)\text{ppy}]_2\text{-(dtbbpy)}\}\text{PF}_6$  (**PC-III**, 5 mol%) in DCE (0.2 mL) irradiated with a 40 W 427 nm LED under an atmosphere of N<sub>2</sub> at 30 °C for 20 h. Yield and conversion were determined by <sup>19</sup>F NMR using PhCF<sub>3</sub> as an internal standard.

### 5.d.iii. PC-I Oxidative Quenching Cycle

**Scheme S4.** Alternate oxidative quenching cycle for PC-I.

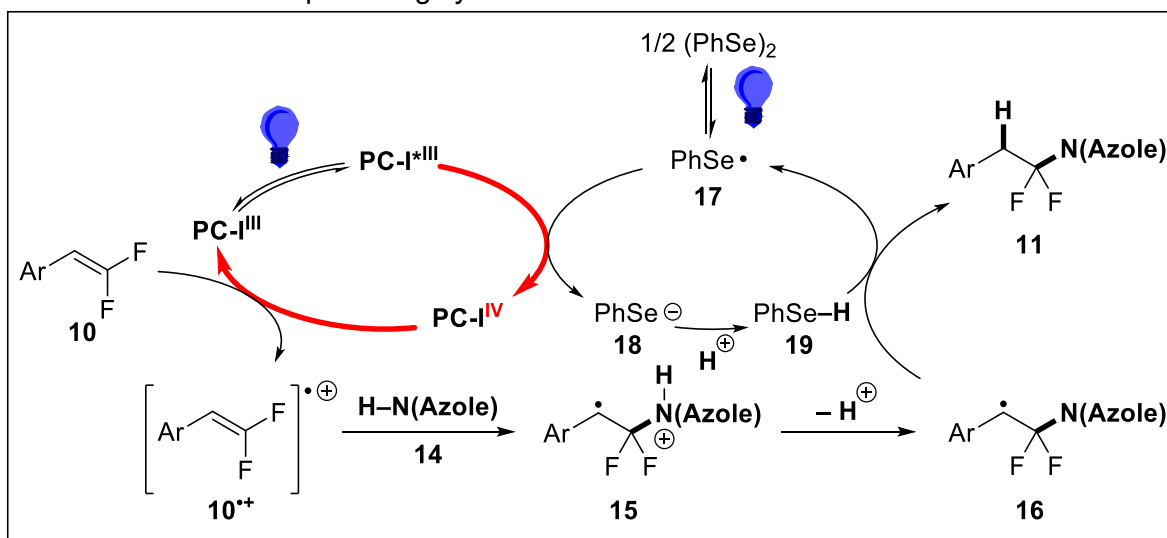

From the main text: "...for certain substrates, a plausible alternate mechanistic hypothesis for **PC-I** might involve an oxidative quenching cycle (Scheme S4) as opposed to a reductive quenching cycle (Scheme 2). Specifically, **PC-I\*** [ $E_{1/2}(\text{PC-I}^{\text{III}}/\text{PC-I}^{\text{IV}}) = -0.81 \text{ V}$ ]<sup>29</sup> might first reduce selenyl radical **17**, thus generating strong oxidant **PC-I**<sup>IV</sup> [ $E_p(\text{PC-I}^{\text{III}}/\text{PC-I}^{\text{IV}}) = +1.56 \text{ V}$ ]<sup>29</sup> which oxidizes *gem*-difluorostyrenes **10n** and **10o**."

To clarify further, this hypothesis could explain the absence of observed luminescence quenching of **PC-I\*** by *gem*-difluorostyrenes **10n** ( $E_p = +1.3 \text{ V}$ ) and **10o** (S36–37), which, despite this apparent lack of energy transfer, react successfully in **PC-I**-catalyzed reactions. **PC-I**<sup>III</sup> [ $E_{1/2}(\text{PC-I}^{\text{III}}/\text{PC-I}^{\text{II}}) = +1.30 \text{ V}$ ]<sup>3</sup> might not be a strong enough oxidant to react with these styrenes. However, if **PC-I** proceeds through an oxidative quenching cycle in these reactions, it will generate strong oxidant **PC-I**<sup>IV</sup> [ $E_p(\text{PC-I}^{\text{III}}/\text{PC-I}^{\text{IV}}) = +1.56 \text{ V}$ ]<sup>29</sup> which may be able to oxidize **10**→**10**<sup>•+</sup>, and that energy transfer would not be detectable by our luminescence quenching experiments.

Notably, **PC-I**<sup>IV</sup> is likely still not a strong enough oxidant to oxidize electron-deficient *gem*-difluorostyrenes **10r** ( $E_p = +1.5 \text{ V}$ ) and **10t** ( $E_p = +1.8 \text{ V}$ ), which is supported by the failure of **PC-I** to react these substrates.

## 5.e. Proposed Mechanisms for Side Product Formation

**Scheme S5.** Possible mechanisms of side product formation

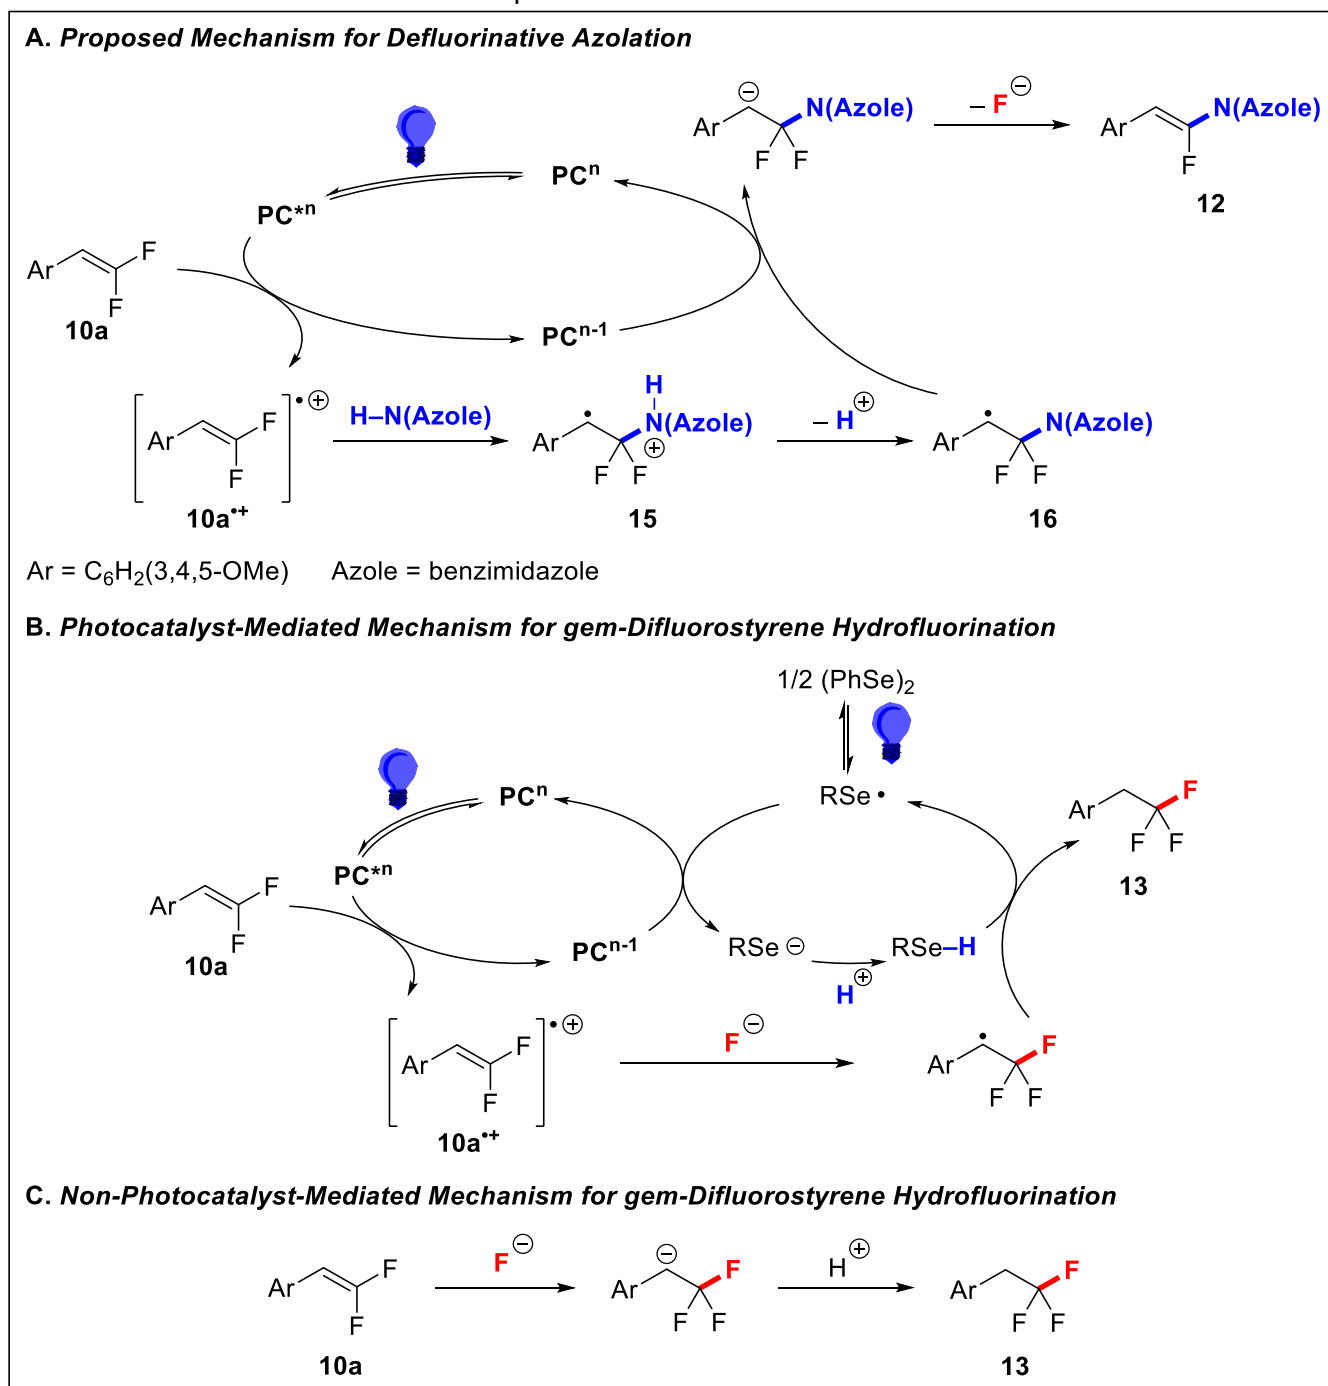

A mechanism (Scheme S5A) that might account for the undesired formation of monofluorovinyl azole side product **12** (entries 4–14, Table 1) involves oxidation of *gem*-difluorostyrene **10a** to radical cation **10a<sup>•+</sup>** by the excited state photocatalyst, nucleophilic attack by benzimidazole to generate acidic radical cation **15**, and deprotonation to afford carbon-based radical **16**. In the absence of a hydrogen atom donor to quench radical **16** or an exogenous oxidant, **16** subsequently oxidizes the reduced state photocatalyst to regenerate ground state photocatalyst and release an unstable anionic intermediate. This anionic intermediate then liberates a fluoride anion to generate undesired monofluorovinyl azole **12**.

Further, this defluorinative pathway might explain the formation benzyl trifluoromethyl side product **13** in reactions that contain diselenide co-catalyst yet still form monofluorovinyl azole **12** (entries 13 and 14, Table 4). Specifically, the aforementioned fluoride anion can attack radical cation **10a**<sup>•+</sup> to generate a carbon-based radical,<sup>14,30</sup> which forms **13** after hydrogen atom transfer with a selenol intermediate (Scheme S5B). Alternatively, direct hydrofluorination of neutral *gem*-difluorostyrene **10a** might explain the trace quantities of **13** in these reactions (Scheme S5C).<sup>31,32</sup>

## 6. References

- 1 C. K. Prier, D. A. Rankic and D. W. C. MacMillan, *Chem. Rev.*, 2013, **113**, 5322–5363.
- 2 T. Y. Shang, L. H. Lu, Z. Cao, Y. Liu, W. M. He and B. Yu, *Chem. Commun.*, 2019, **55**, 5408–5419.
- 3 E. Tsui, A. J. Metrano, Y. Tsuchiya and R. R. Knowles, *Angew. Chem. Int. Ed.*, 2020, **59**, 11845–11849.
- 4 A. Joshi-Pangu, F. Lévesque, H. G. Roth, S. F. Oliver, L. C. Campeau, D. Nicewicz and D. A. DiRocco, *J. Org. Chem.*, 2016, **81**, 7244–7249.
- 5 J. P. Sorrentino, D. L. Orsi and R. A. Altman, *J. Org. Chem.*, 2021, **86**, 2297–2311.
- 6 J. Zheng, J. Cai, J. H. Lin, Y. Guo and J. C. Xiao, *Chem. Commun.*, 2013, **49**, 7513–7515.
- 7 D. L. Orsi, B. J. Easley, A. M. Lick and R. A. Altman, *Org. Lett.*, 2017, **19**, 1570–1573.
- 8 S. Habib and D. Gueyrard, *European J. Org. Chem.*, 2015, **2015**, 871–875.
- 9 D. L. Orsi, J. T. Douglas, J. P. Sorrentino and R. A. Altman, *J. Org. Chem.*, 2020, **85**, 10451–10465.
- 10 A. J. Intelli, J. P. Sorrentino and R. A. Altman, *Org. Synth.*, 2024, **101**, 542–563.
- 11 Y. Zhao, W. Huang, L. Zhu and J. Hu, *Org. Lett.*, 2010, **12**, 1444–1447.
- 12 H. Sakaguchi, Y. Uetake, M. Ohashi, T. Niwa, S. Ogoshi and T. Hosoya, *J. Am. Chem. Soc.*, 2017, **139**, 12855–12862.
- 13 T. M. Gøgsig, L. S. Søbjerg, A. T. Lindhardt, K. L. Jensen and T. Skrydstrup, *J. Org. Chem.*, 2008, **73**, 3404–3410.
- 14 H. Liu, L. Ge, D. X. Wang, N. Chen and C. Feng, *Angew. Chem. Int. Ed.*, 2019, **58**, 3918–3922.
- 15 J. P. Sorrentino, R. M. Herrick, M. K. Abd El-Gaber, A. Z. Abdelazem, A. Kumar and R. A. Altman, *J. Org. Chem.*, 2022, **87**, 16676–16690.
- 16 R. M. Herrick, M. K. Abd El-Gaber, G. Coy and R. A. Altman, *Chem. Commun.*, 2023, **59**, 5623–5626.
- 17 H. G. Yayla, H. Wang, K. T. Tarantino, H. S. Orbe and R. R. Knowles, *J. Am. Chem. Soc.*, 2016, **138**, 10794–10797.
- 18 G. J. Choi, Q. Zhu, D. C. Miller, C. J. Gu and R. R. Knowles, *Nature*, 2016, **539**, 268–271.
- 19 W. R. Laws and P. B. Contino, *Methods Enzymol.*, 1992, **210**, 448–463.
- 20 J. Keizer, *J. Am. Chem. Soc.*, 1983, **105**, 1494–1498.
- 21 G. T. S. T. da Silva, F. S. Michels, R. G. Silveira, A. R. L. Caires and G. A. Casagrande, *J. Mol. Struct.*, 2019, **1185**, 21–26.
- 22 I. D. Lemir, W. D. Castro-Godoy, A. A. Heredia, L. C. Schmidt and J. E. Argüello, *RSC Adv.*, 2019, **9**, 22685–22694.
- 23 L. Zhang, Y. Wang, J. Shen, H. Xu and C. Shen, *Org. Chem. Front.*, 2024, **11**, 2727–2732.

- 24 J. Guo, L. Zhang, X. Du, L. Zhang, Y. Cai and Q. Xia, *European J. Org. Chem.*, 2021, **2021**, 2230–2238.
- 25 K. Niu, L. Ding, P. Zhou, Y. Hao, Y. Liu, H. Song and Q. Wang, *Green Chem.*, 2021, **23**, 3246–3249.
- 26 M. S. Lowry, J. I. Goldsmith, J. D. Slinker, R. Rohl, R. A. Pascal, G. G. Malliaras and S. Bernhard, *Chem. Mater.*, 2005, **17**, 5712–5719.
- 27 C. Zhu, Y. F. Zhang, Z. Y. Liu, L. Zhou, H. Liu and C. Feng, *Chem. Sci.*, 2019, **10**, 6721–6726.
- 28 S. Ortgies, C. Depken and A. Breder, *Org. Lett.*, 2016, **18**, 2856–2859.
- 29 Q. Zhu, E. C. Gentry and R. R. Knowles, *Angew. Chem. Int. Ed.*, 2016, **55**, 9969–9973.
- 30 R. Chen, D. Yin, L. Lu, X. T. Feng, Y. Dou, Y. Zhu and S. Fan, *Org. Lett.*, 2023, **25**, 7293–7297.
- 31 B. V. Nguyen and D. J. Burton, *J. Org. Chem.*, 1997, **62**, 7758–7764.
- 32 Y. Qiao, T. Si, M. H. Yang and R. A. Altman, *J. Org. Chem.*, 2014, **79**, 7122–7131.

# NMR spectra for 2-(2,2-difluorovinyl)benzofuran (**10d**)

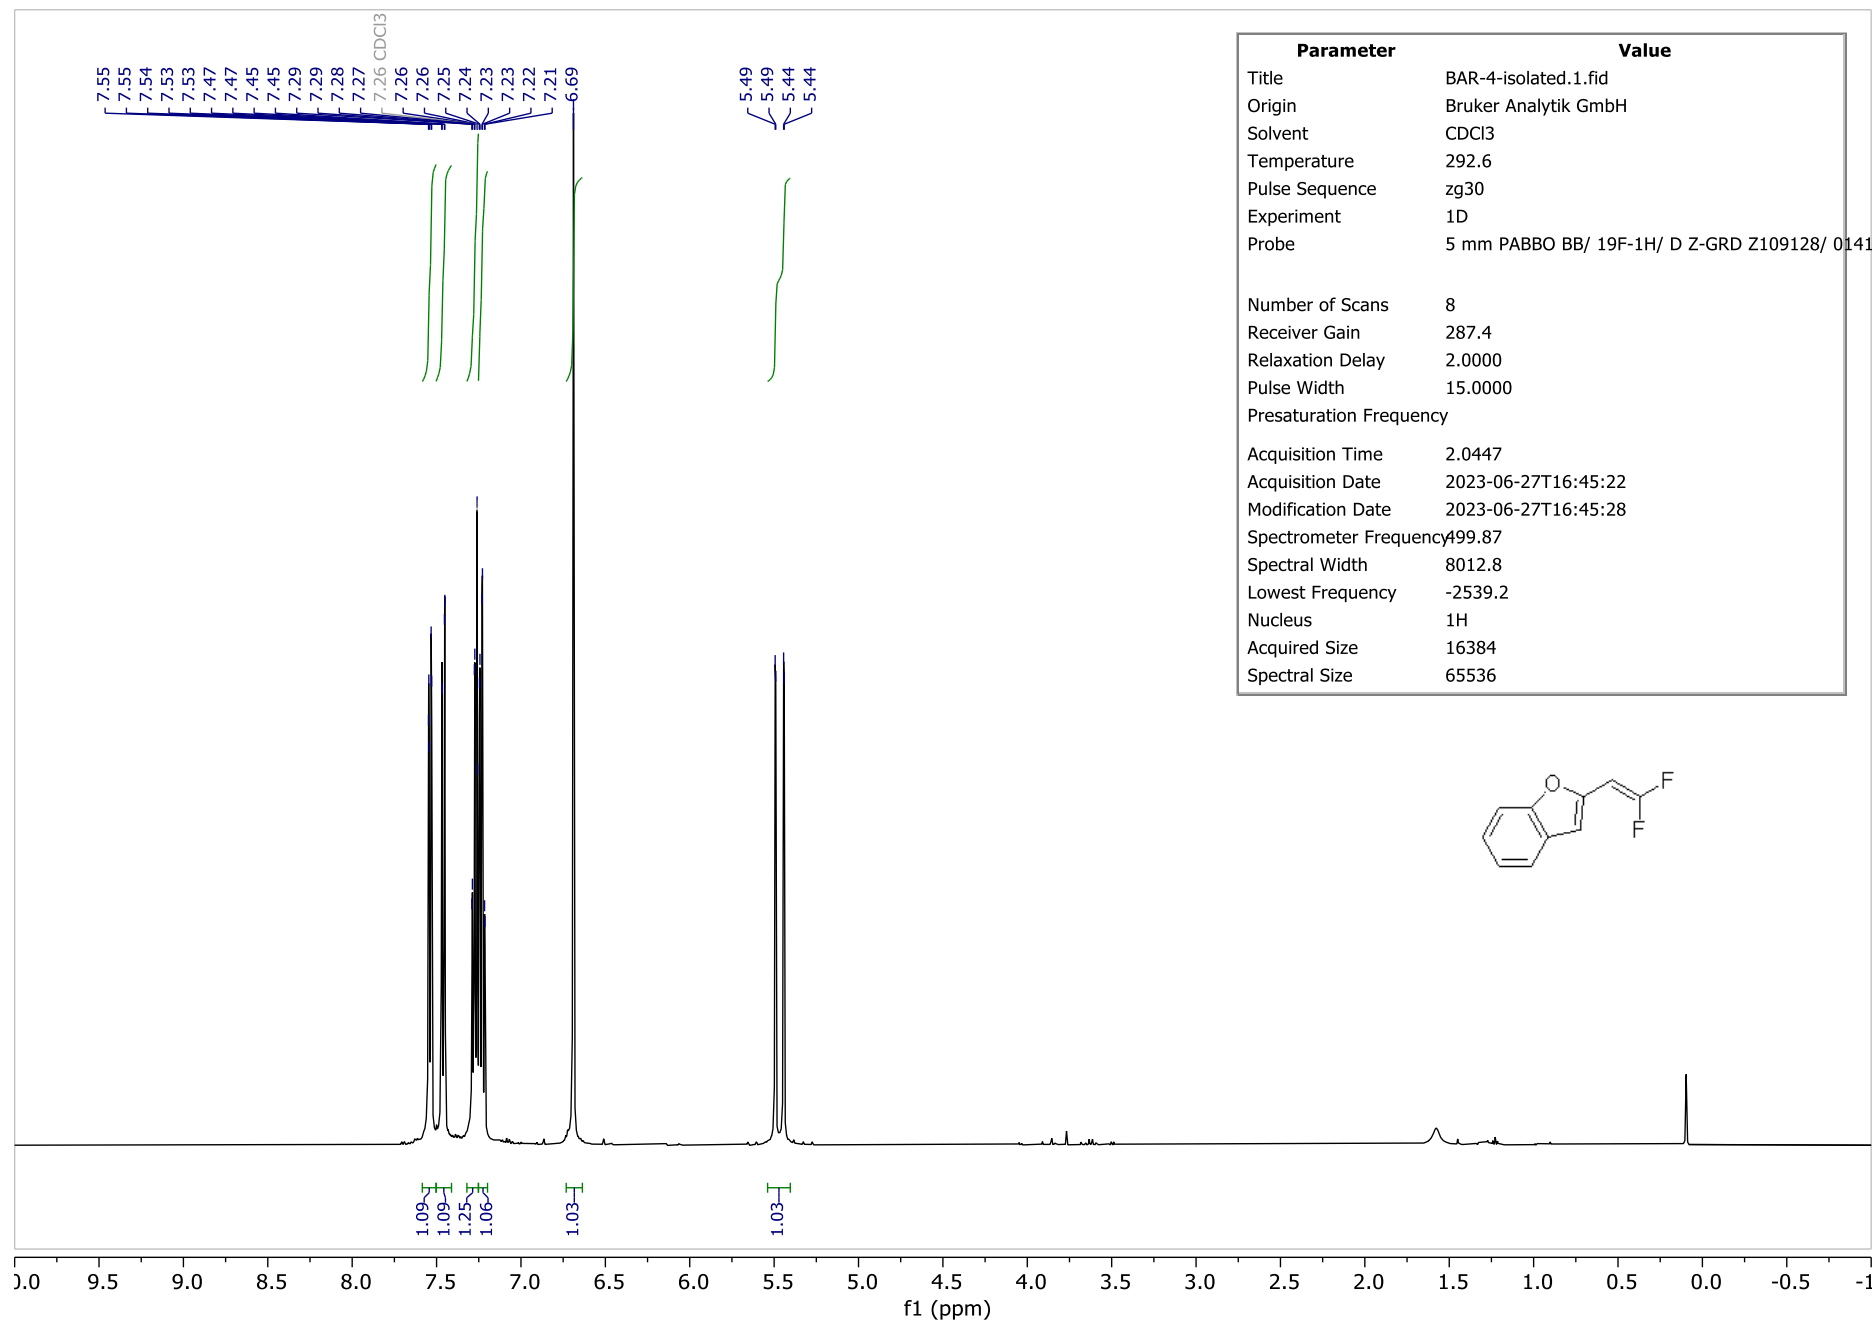

# NMR spectra for 2-(2,2-difluorovinyl)-1-tosyl-1H-pyrrole (**10f**)

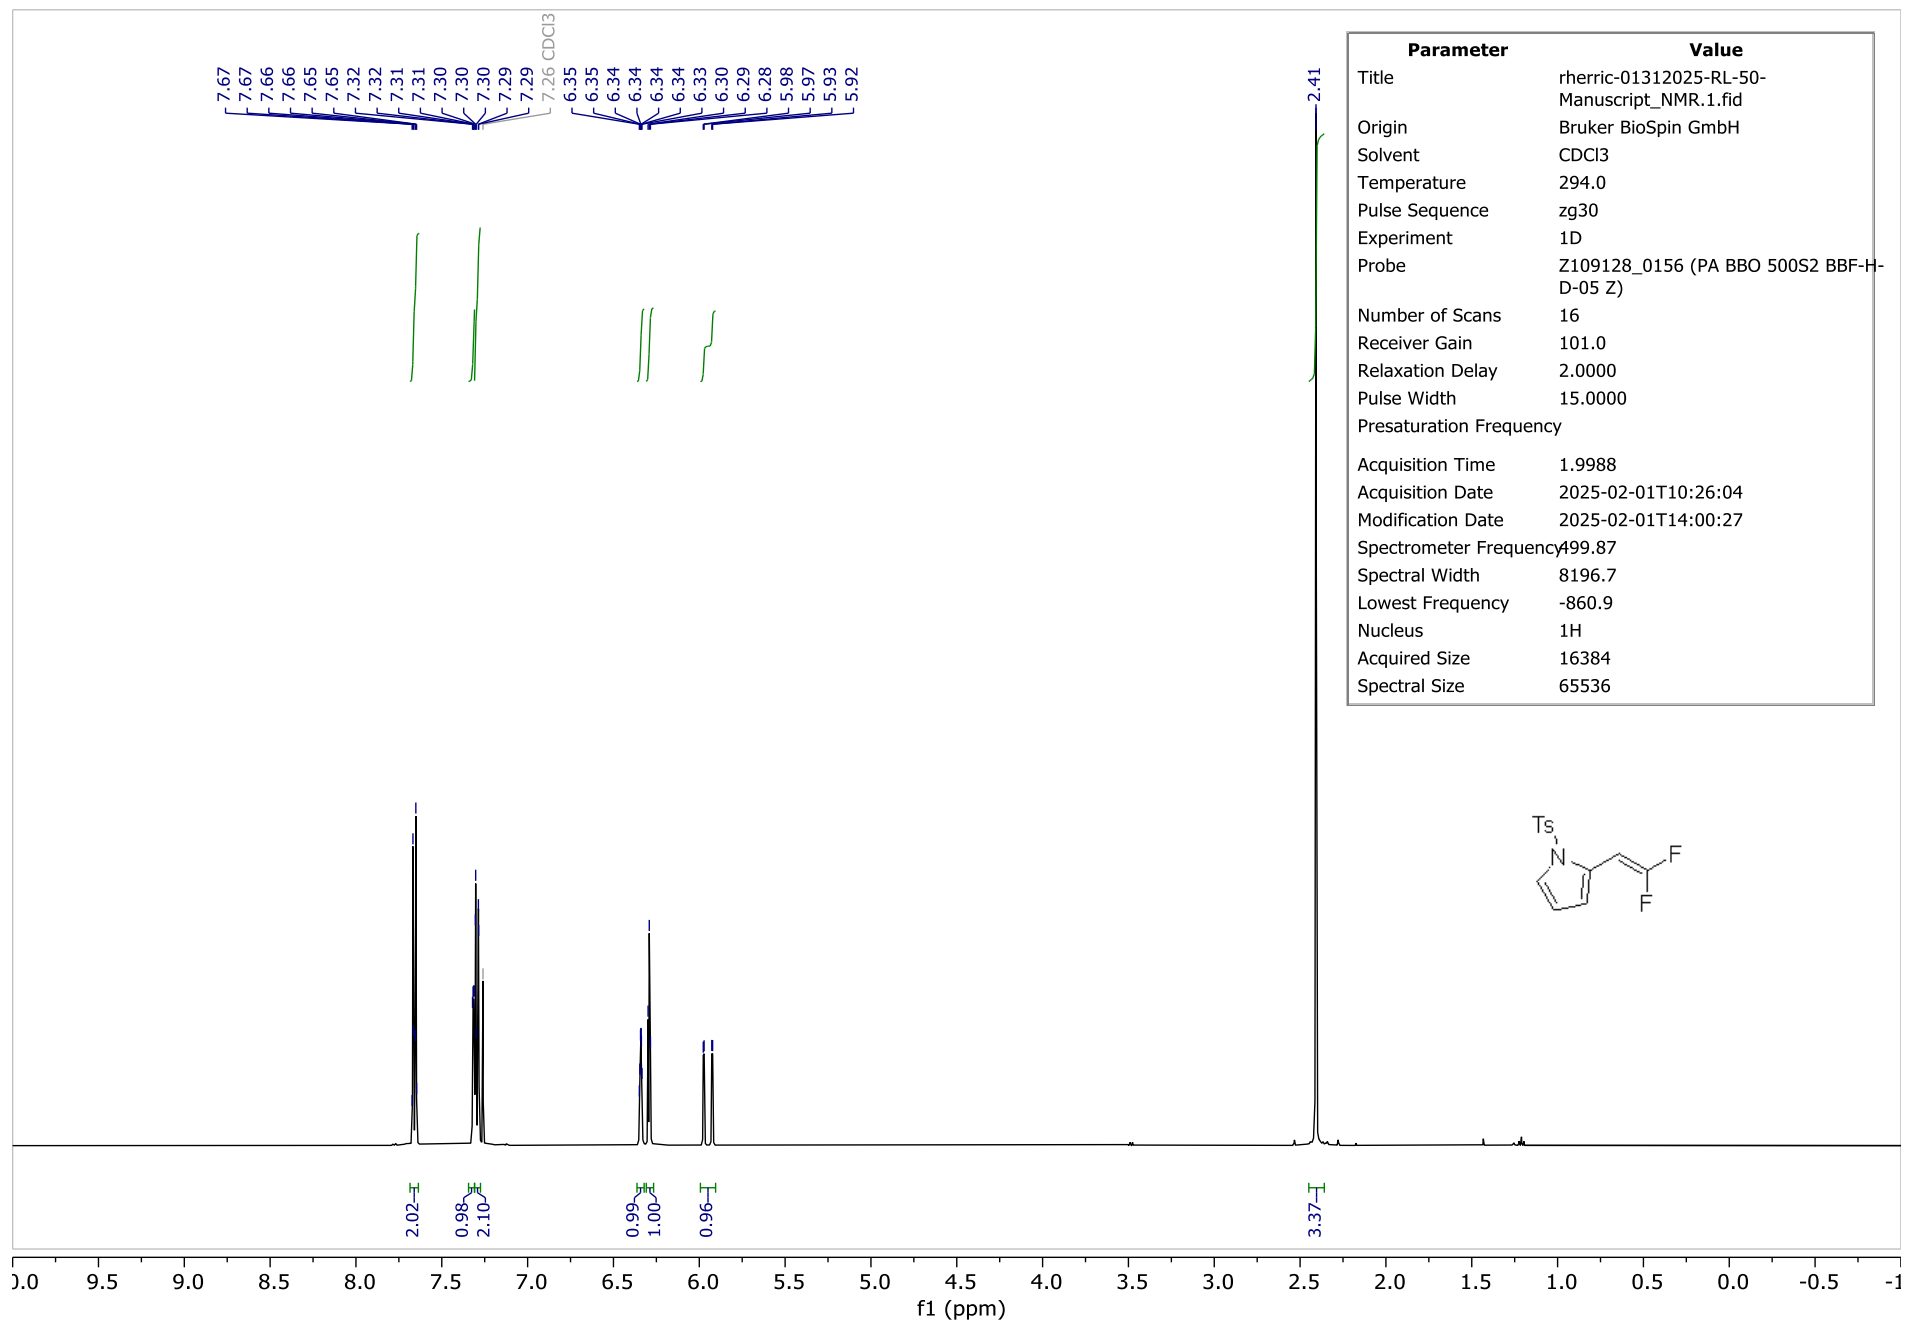

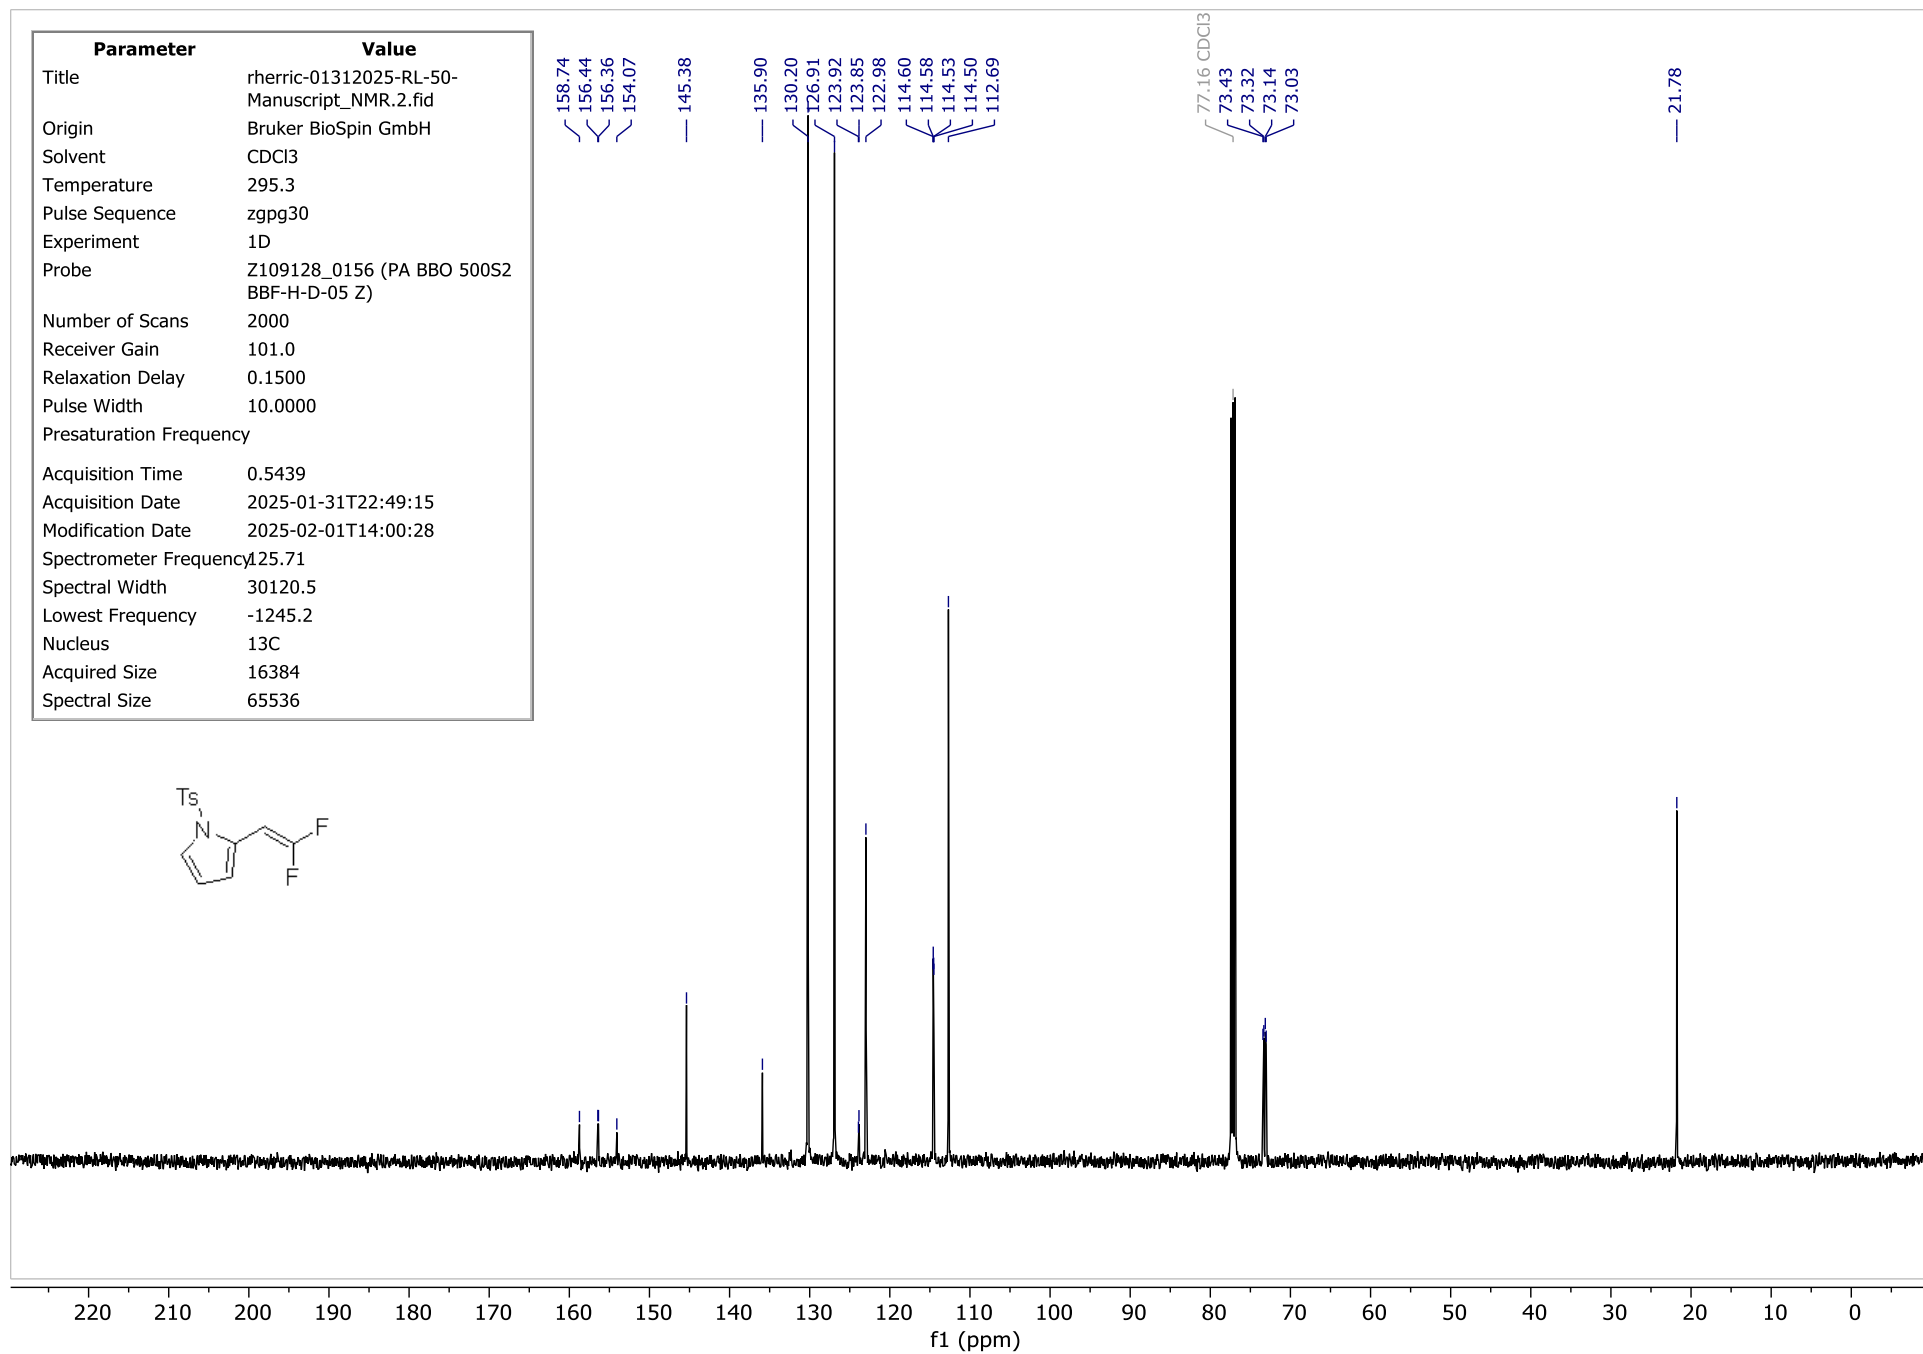



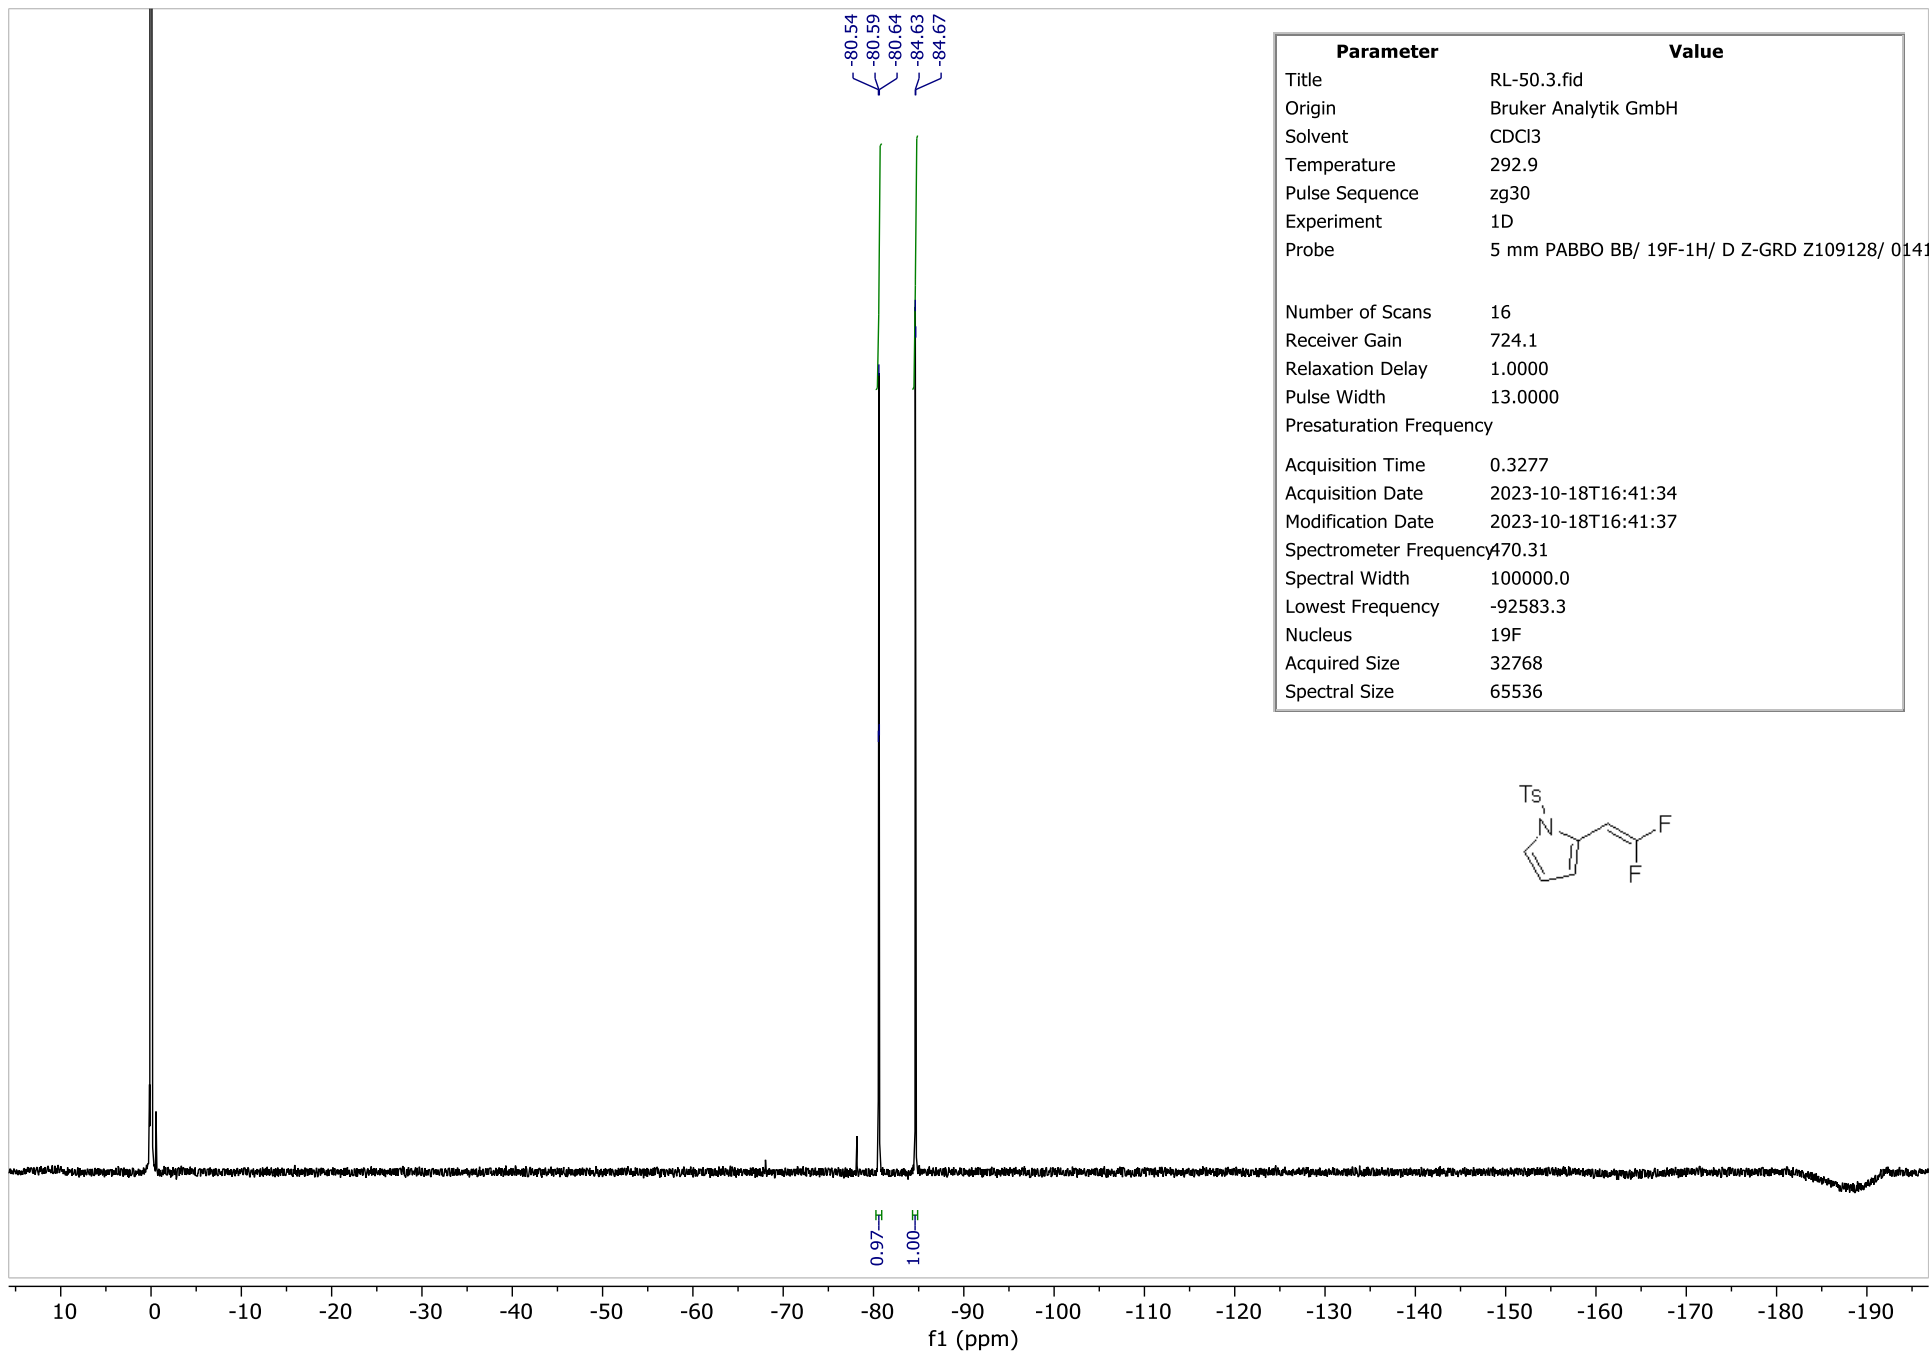

# NMR spectra for 1-(difluoromethylene)-1,2,3,4-tetrahydronaphthalene (**10h**)

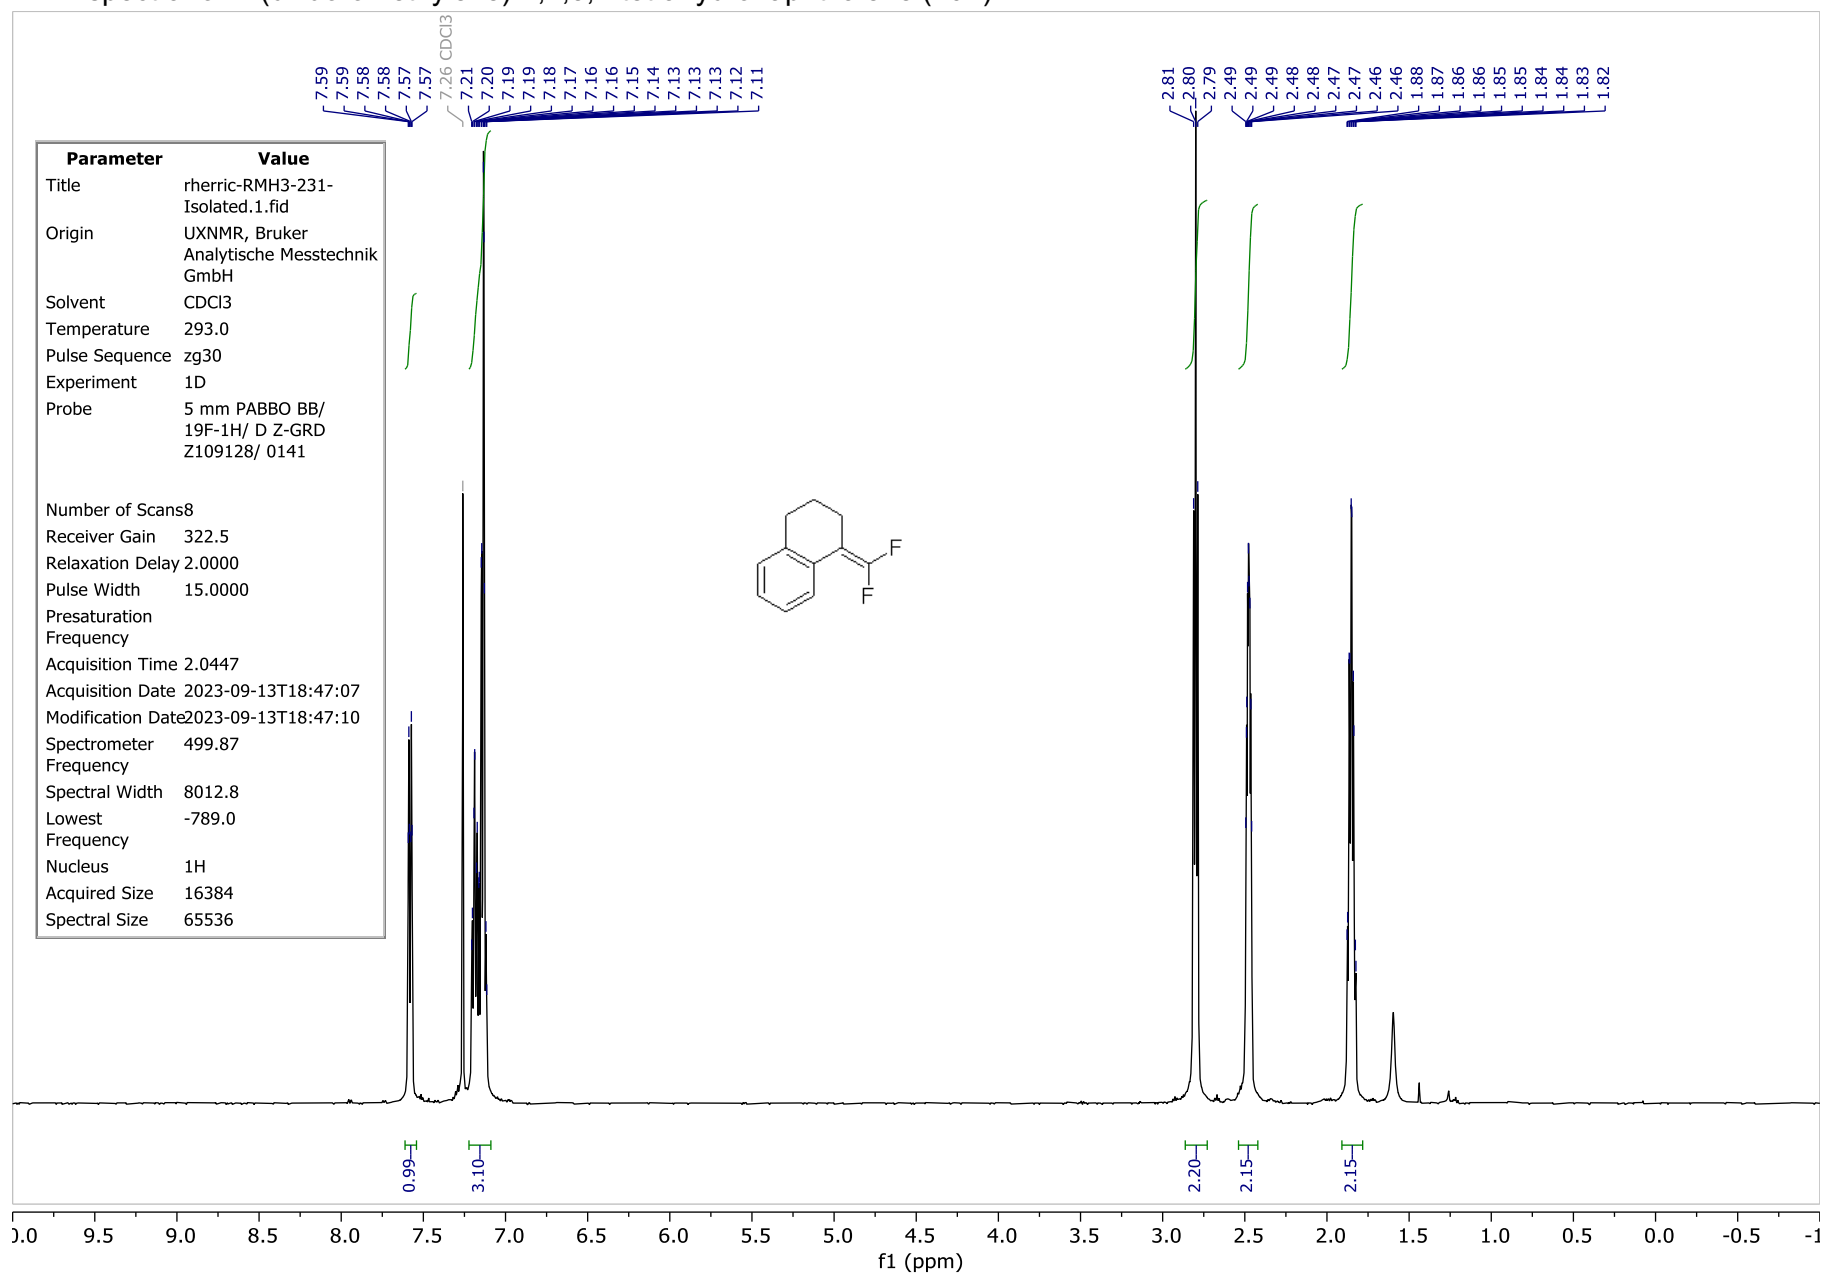

# NMR spectra for 2-(2,2-difluorovinyl)naphthalene (**10i**)

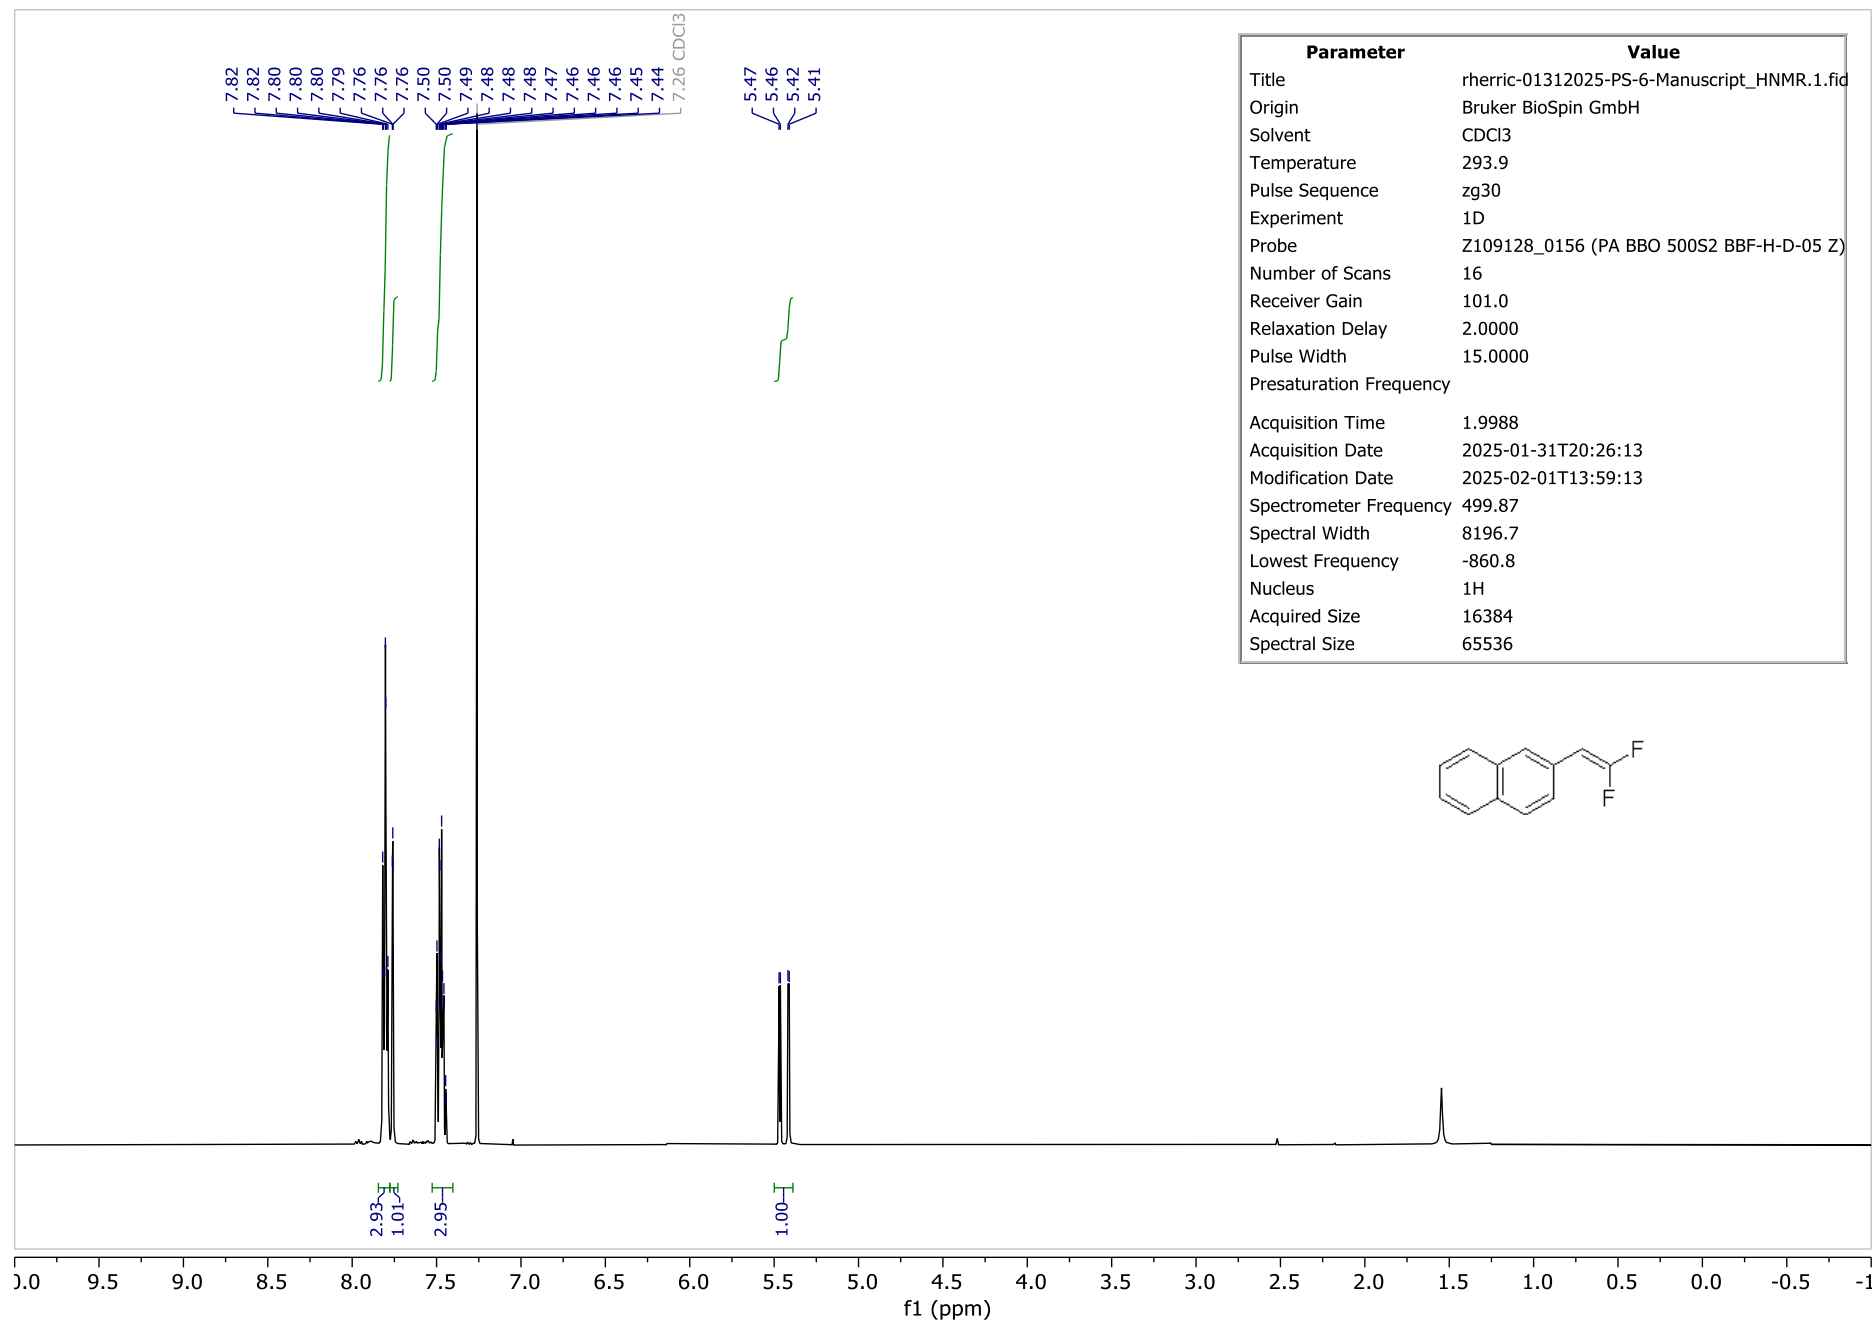

# NMR spectra for *N*-(4-(2,2-difluorovinyl)phenyl)acetamide (**10j**)

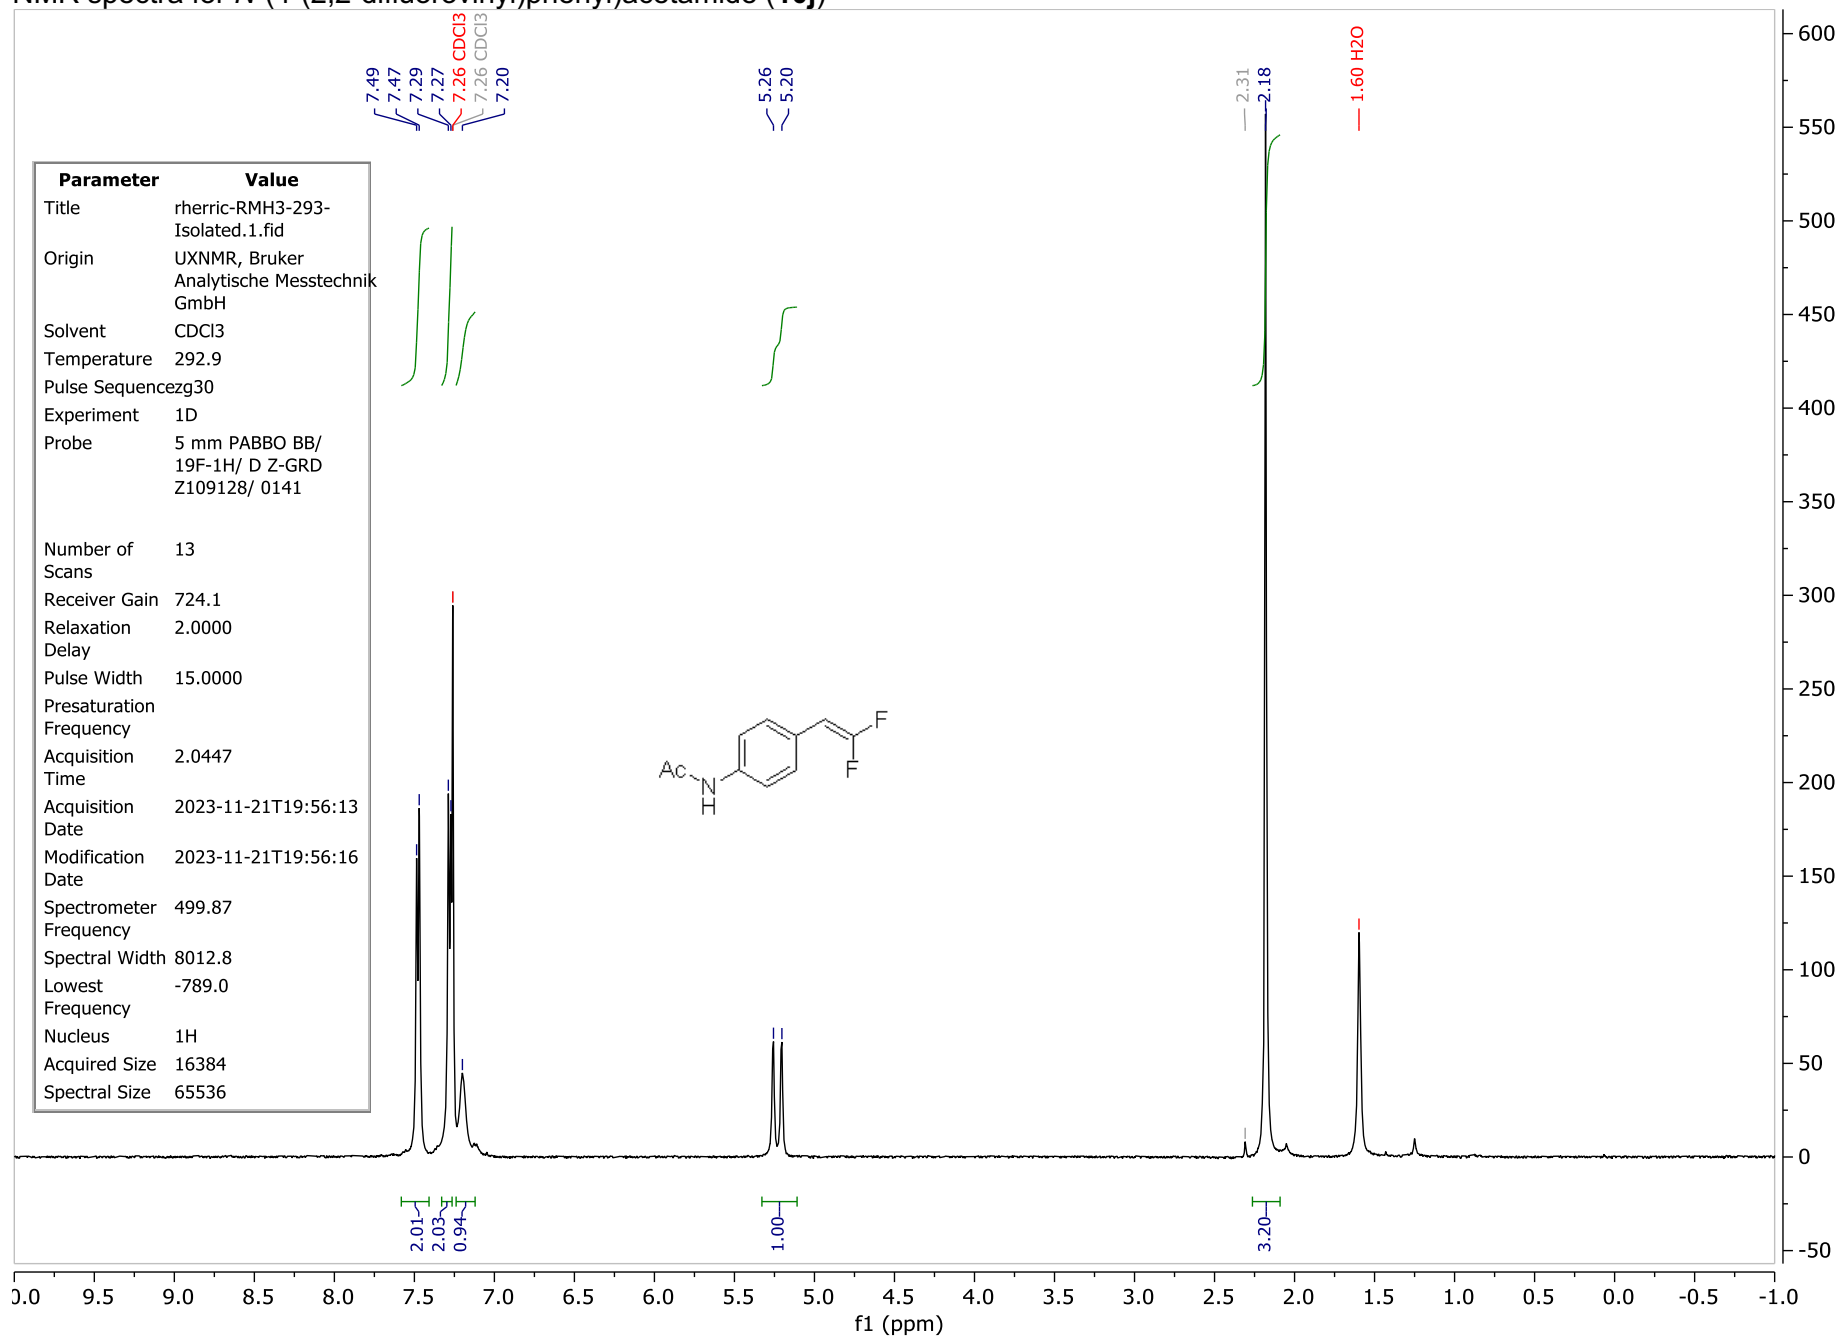

# NMR spectra for 2-chloro-4-(2,2-difluorovinyl)-1-methoxybenzene (**10p**)

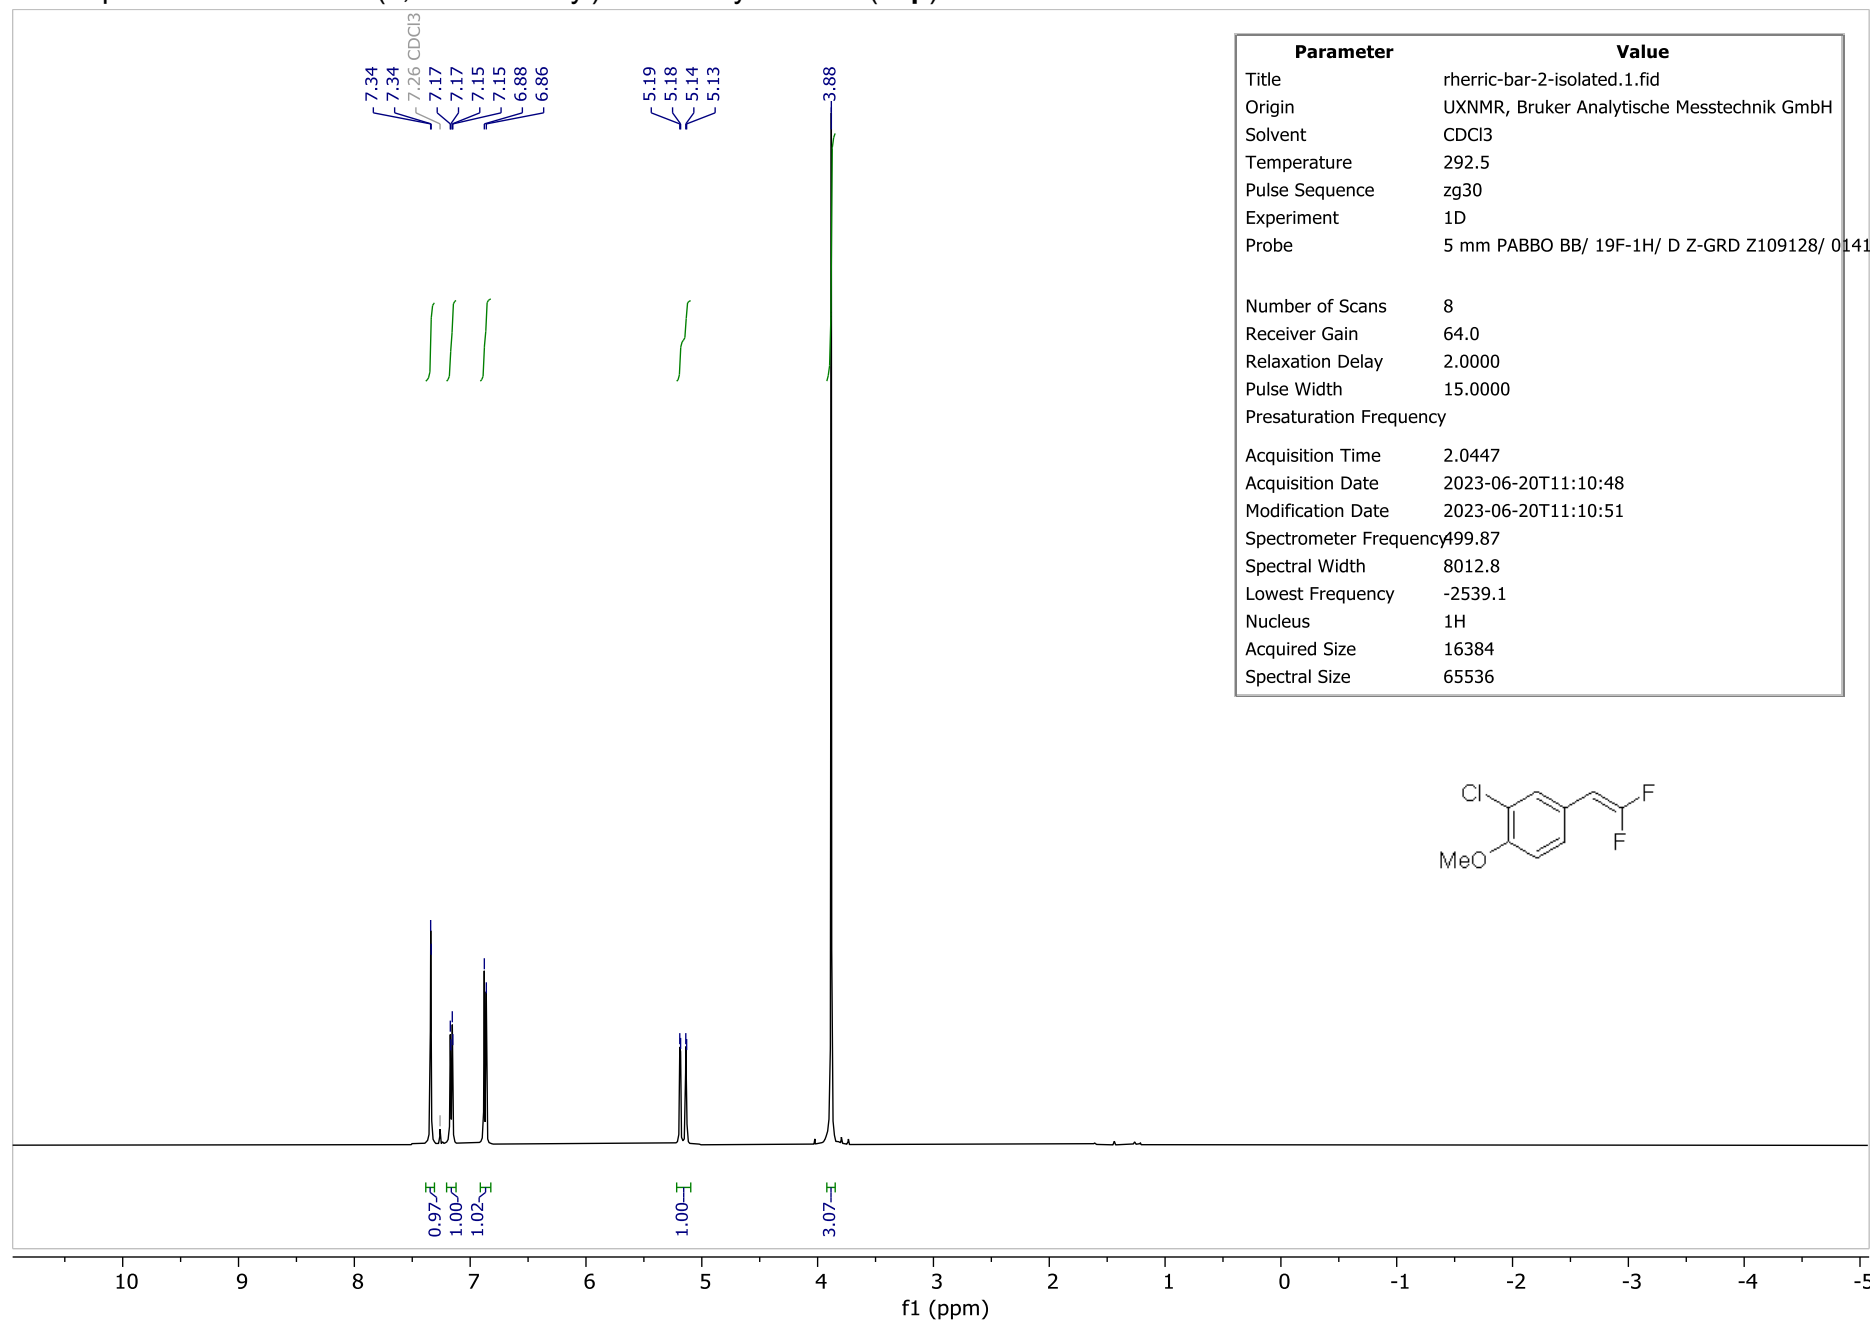

# NMR spectra for 1-(1-cyclopropyl-2,2-difluorovinyl)-4-methoxybenzene (**10s**)

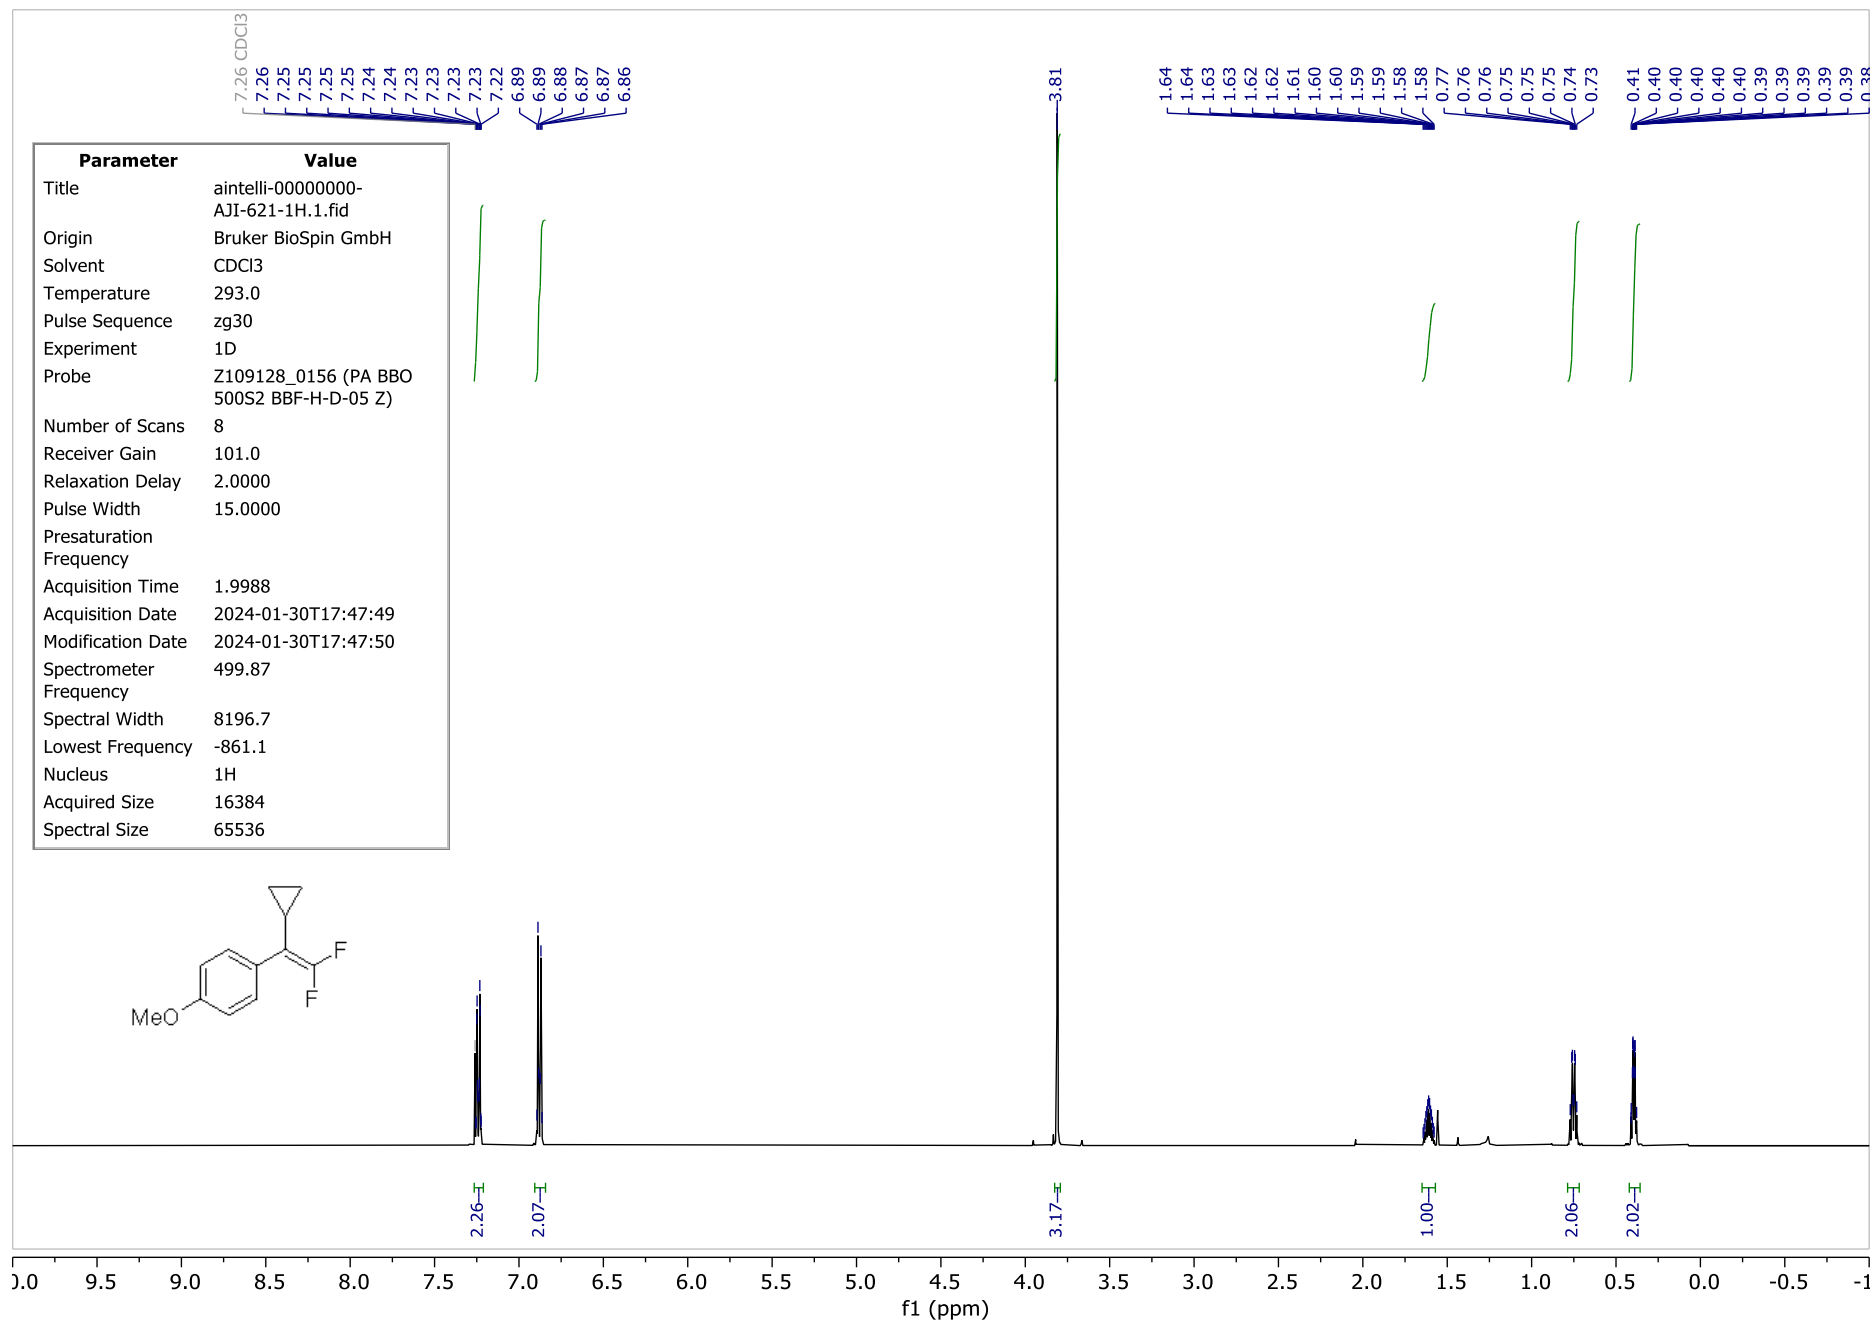

NMR spectra for 1-(1,1-difluoro-2-(3,4,5-trimethoxyphenyl)ethyl)-1*H*-benzo[*d*]imidazole (**11aa**)

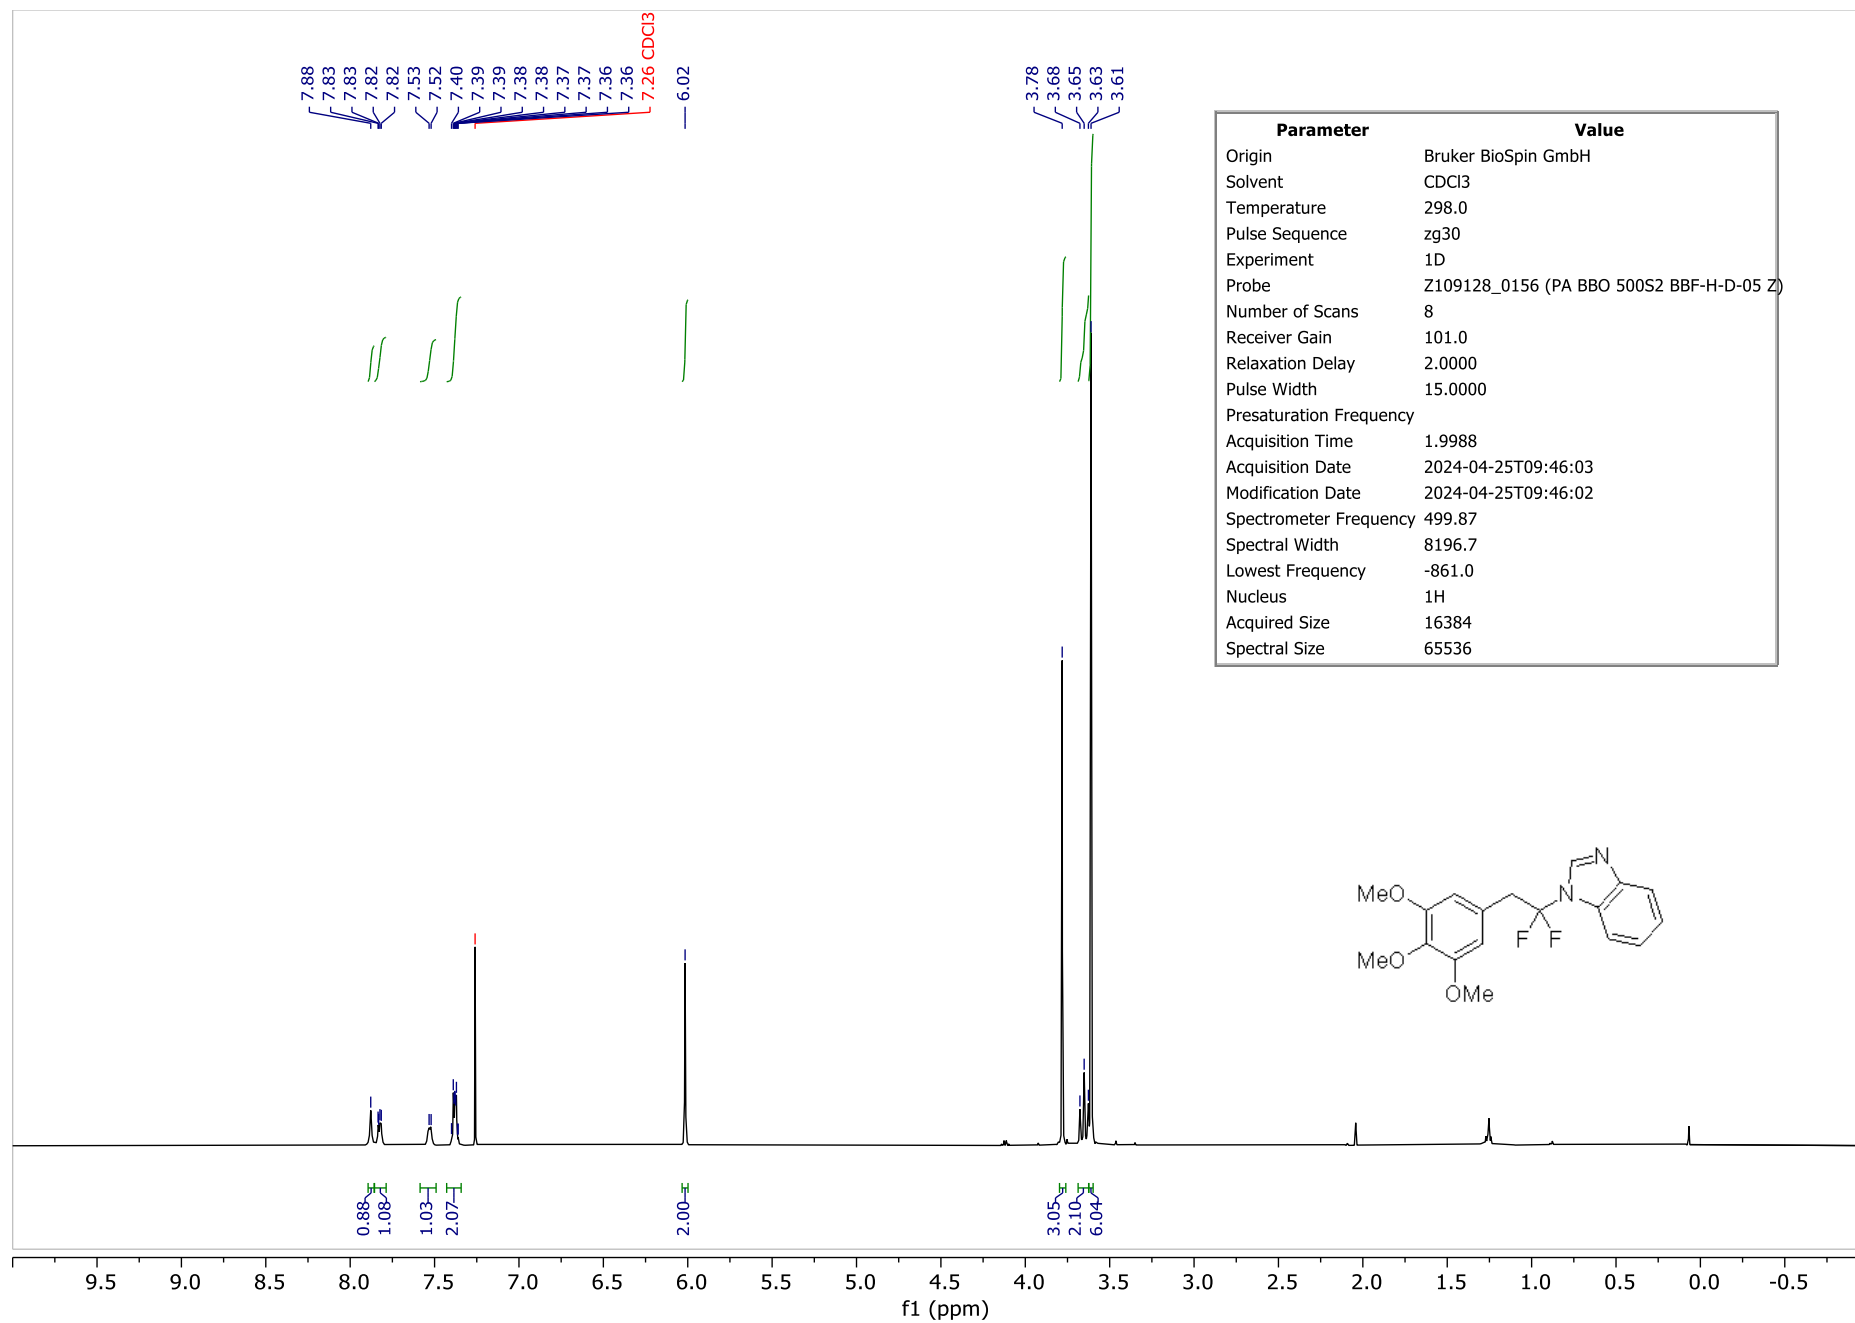

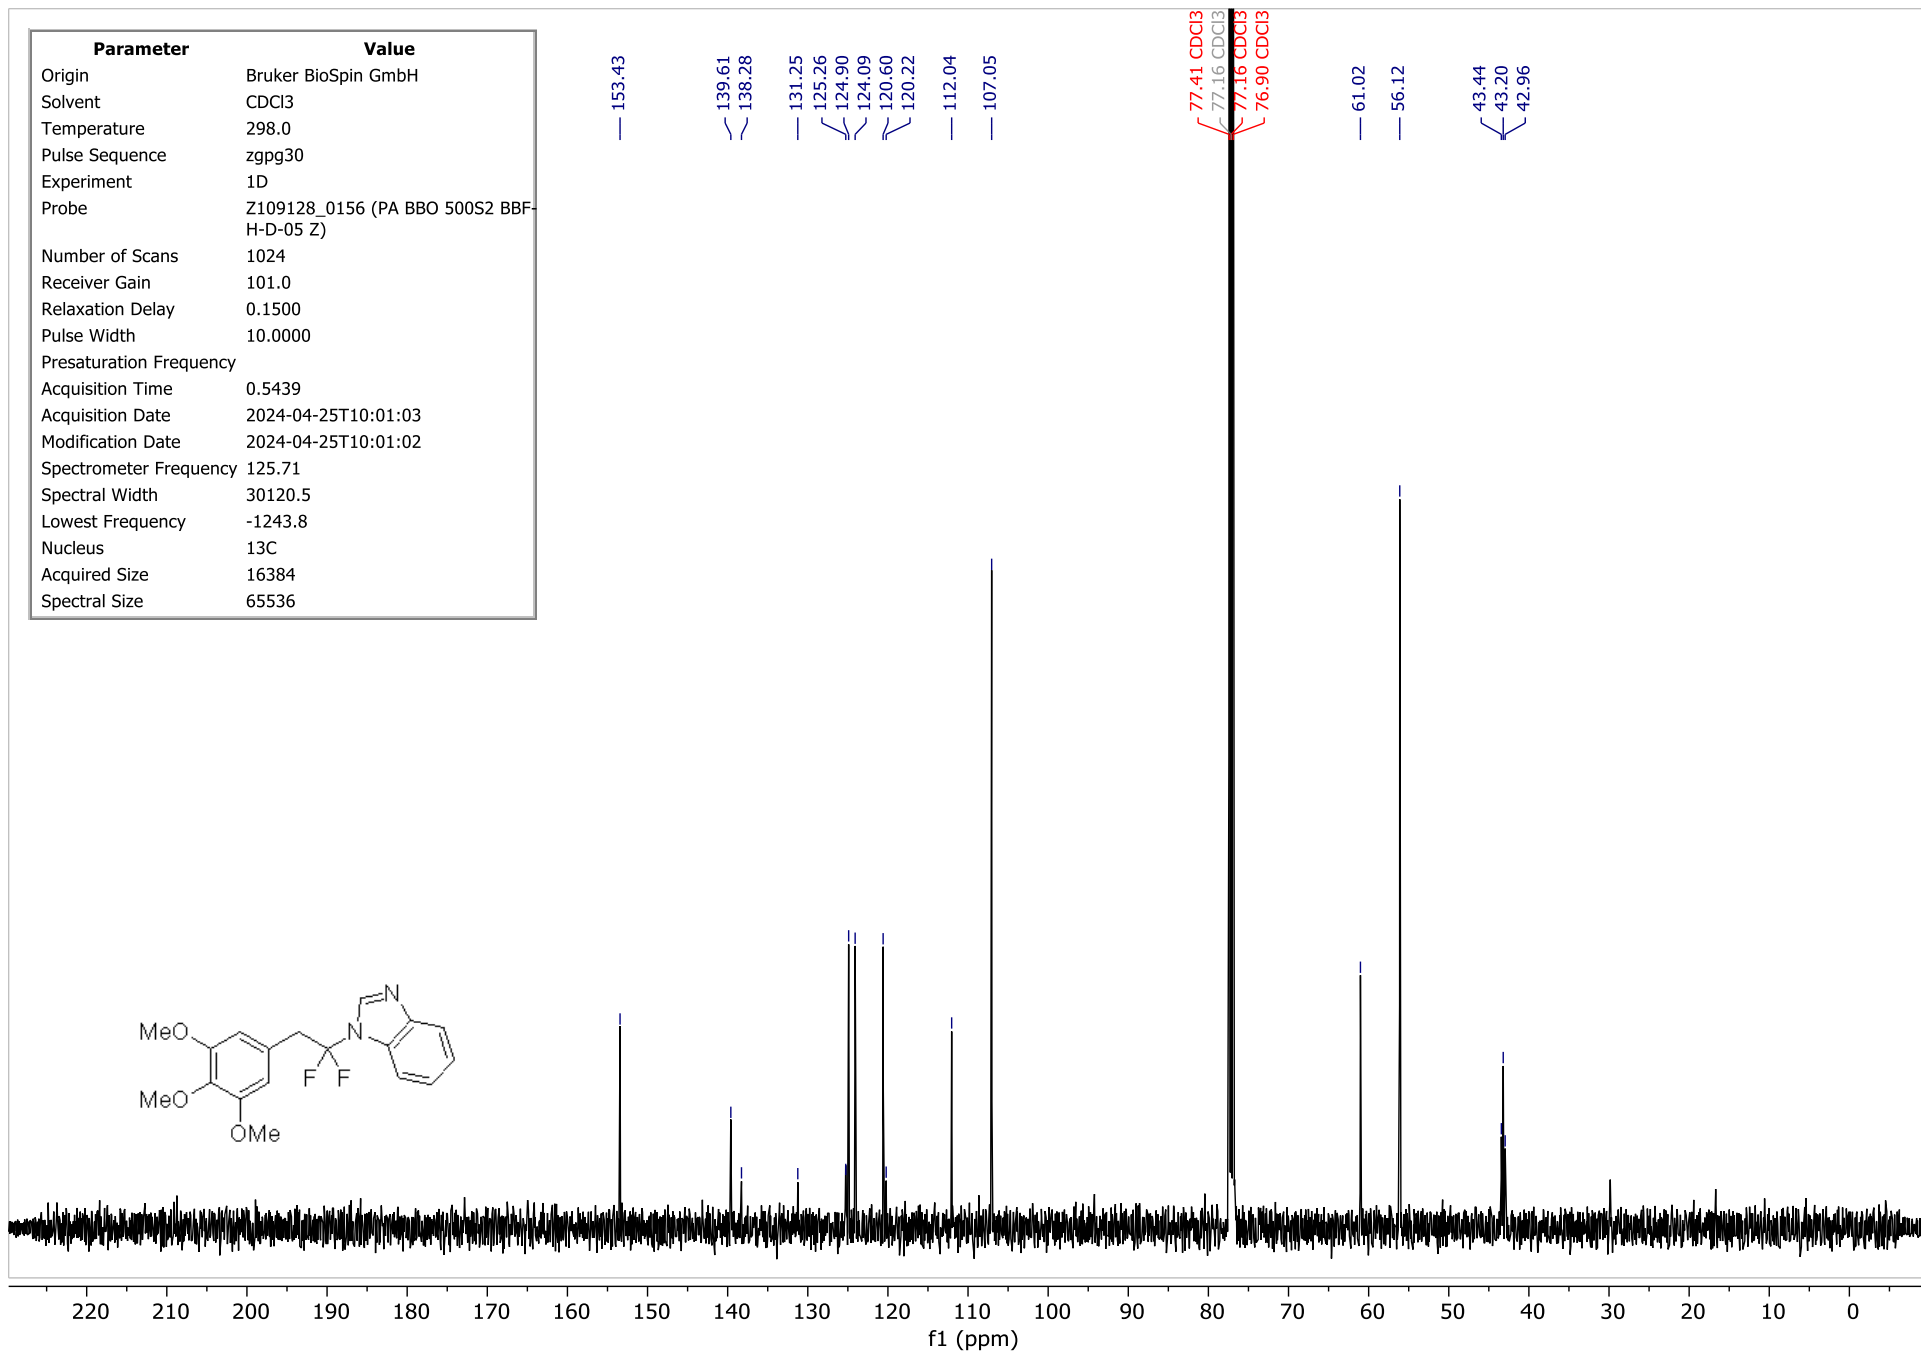



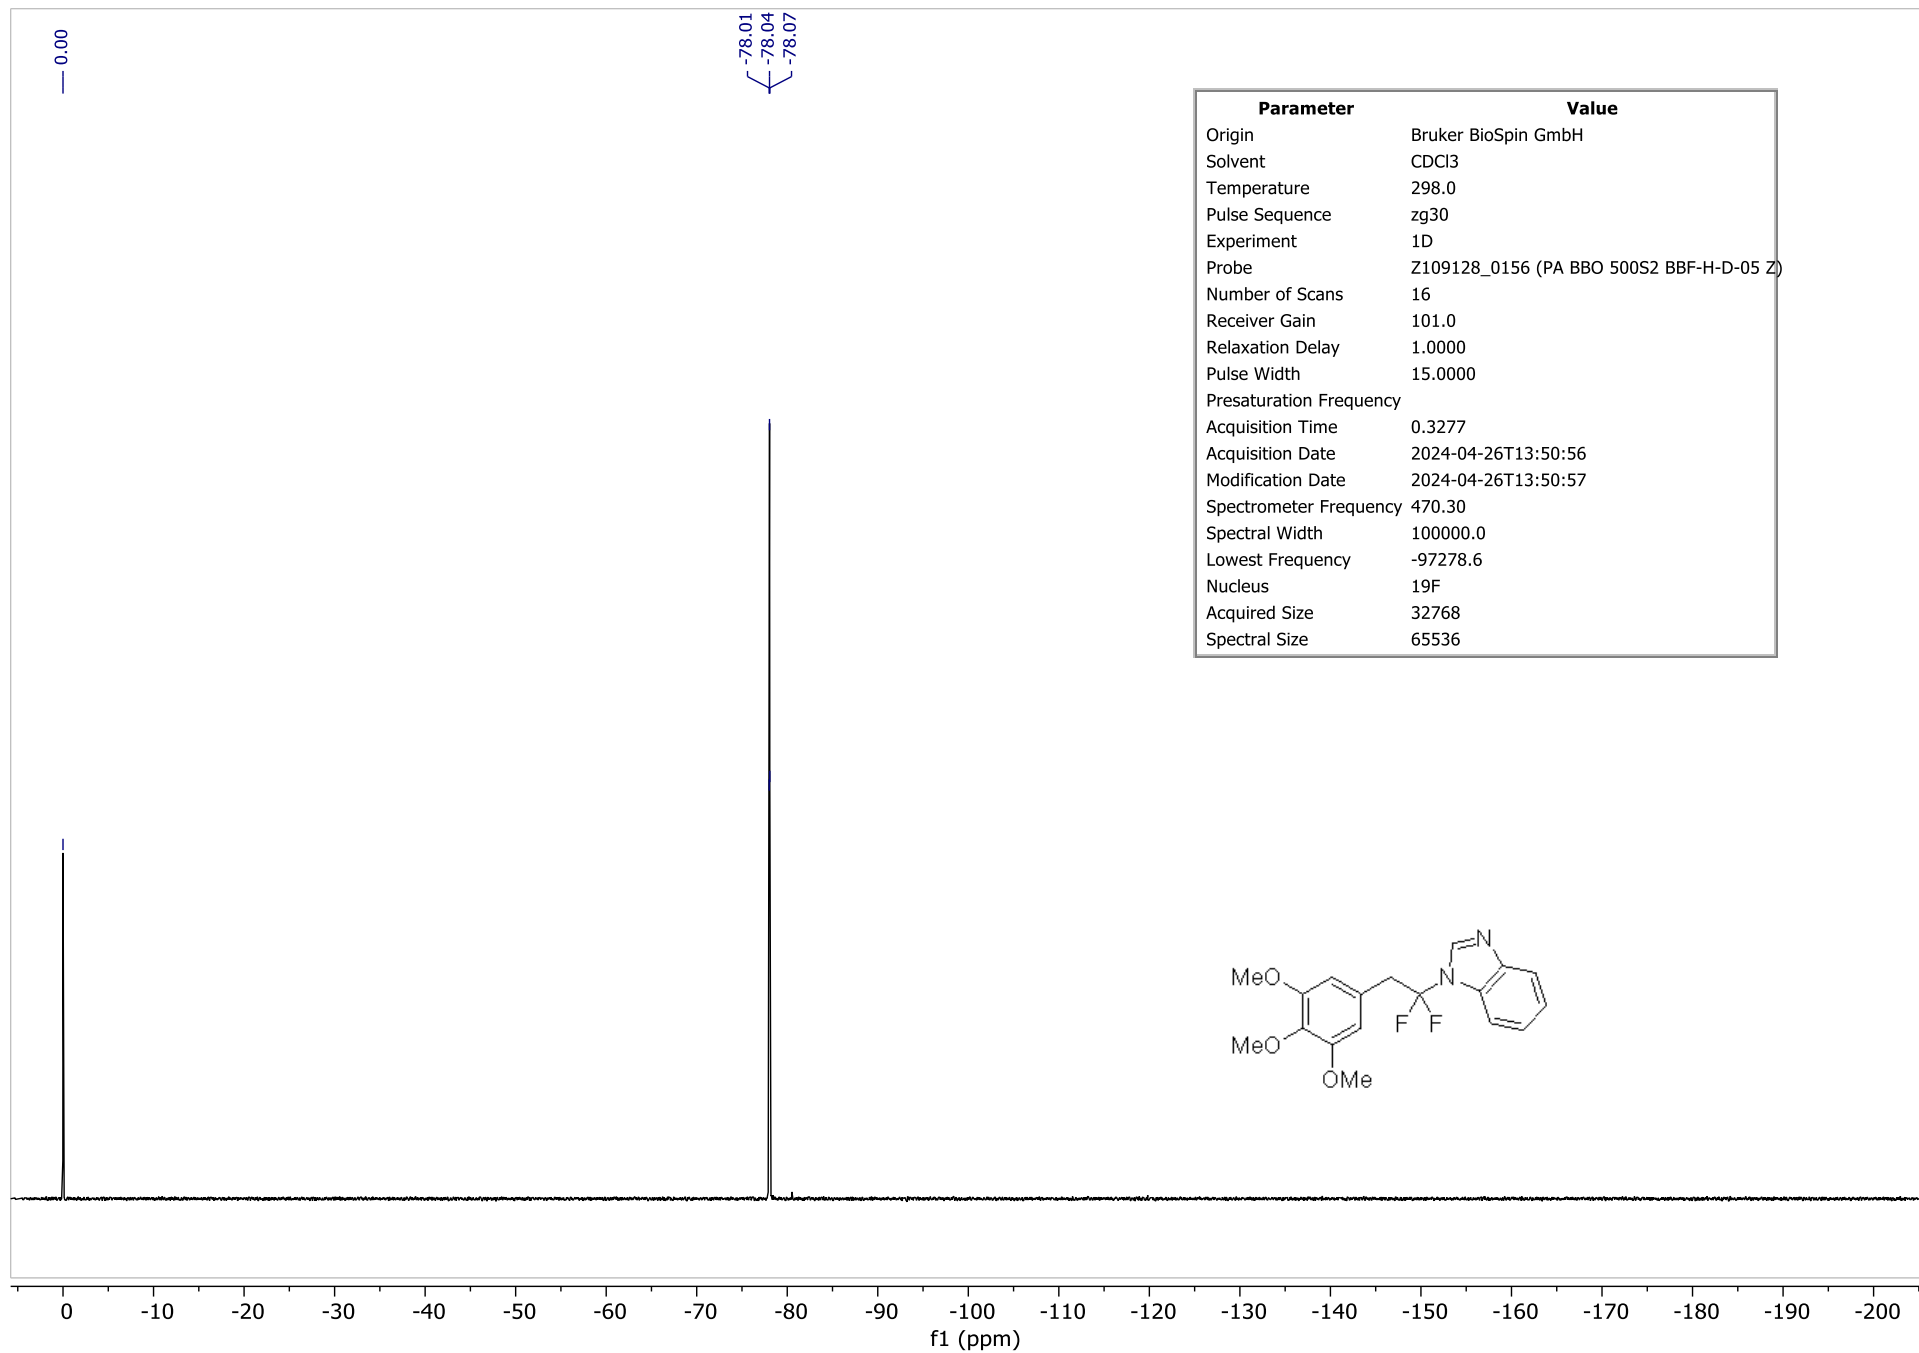

NMR spectra for 1-(1,1-difluoro-2-(3,4,5-trimethoxyphenyl)ethyl)-6- and -5-nitro-1*H*-benzo[d]imidazole (**11ab**)

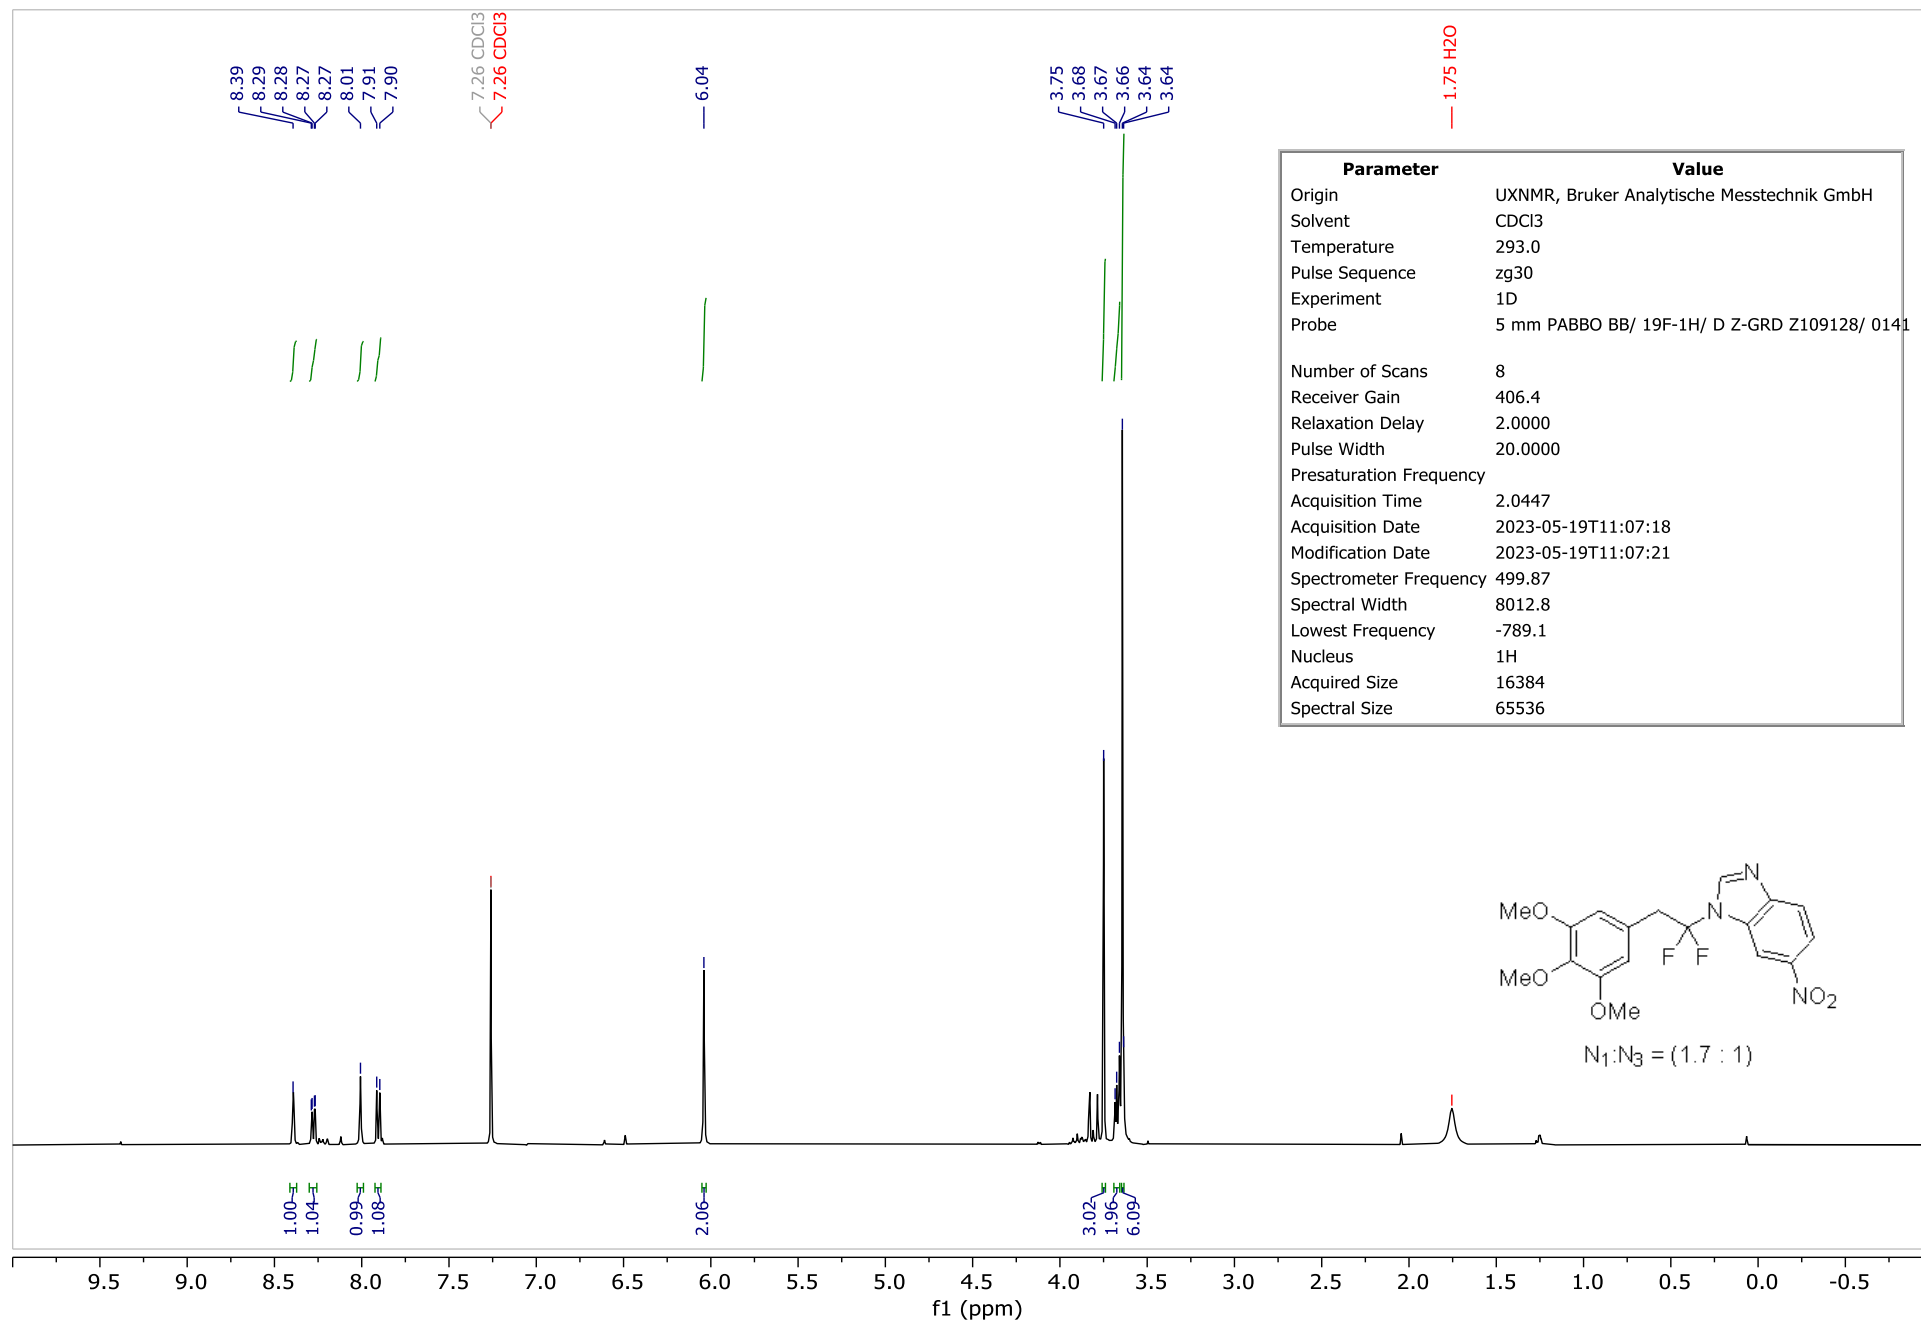

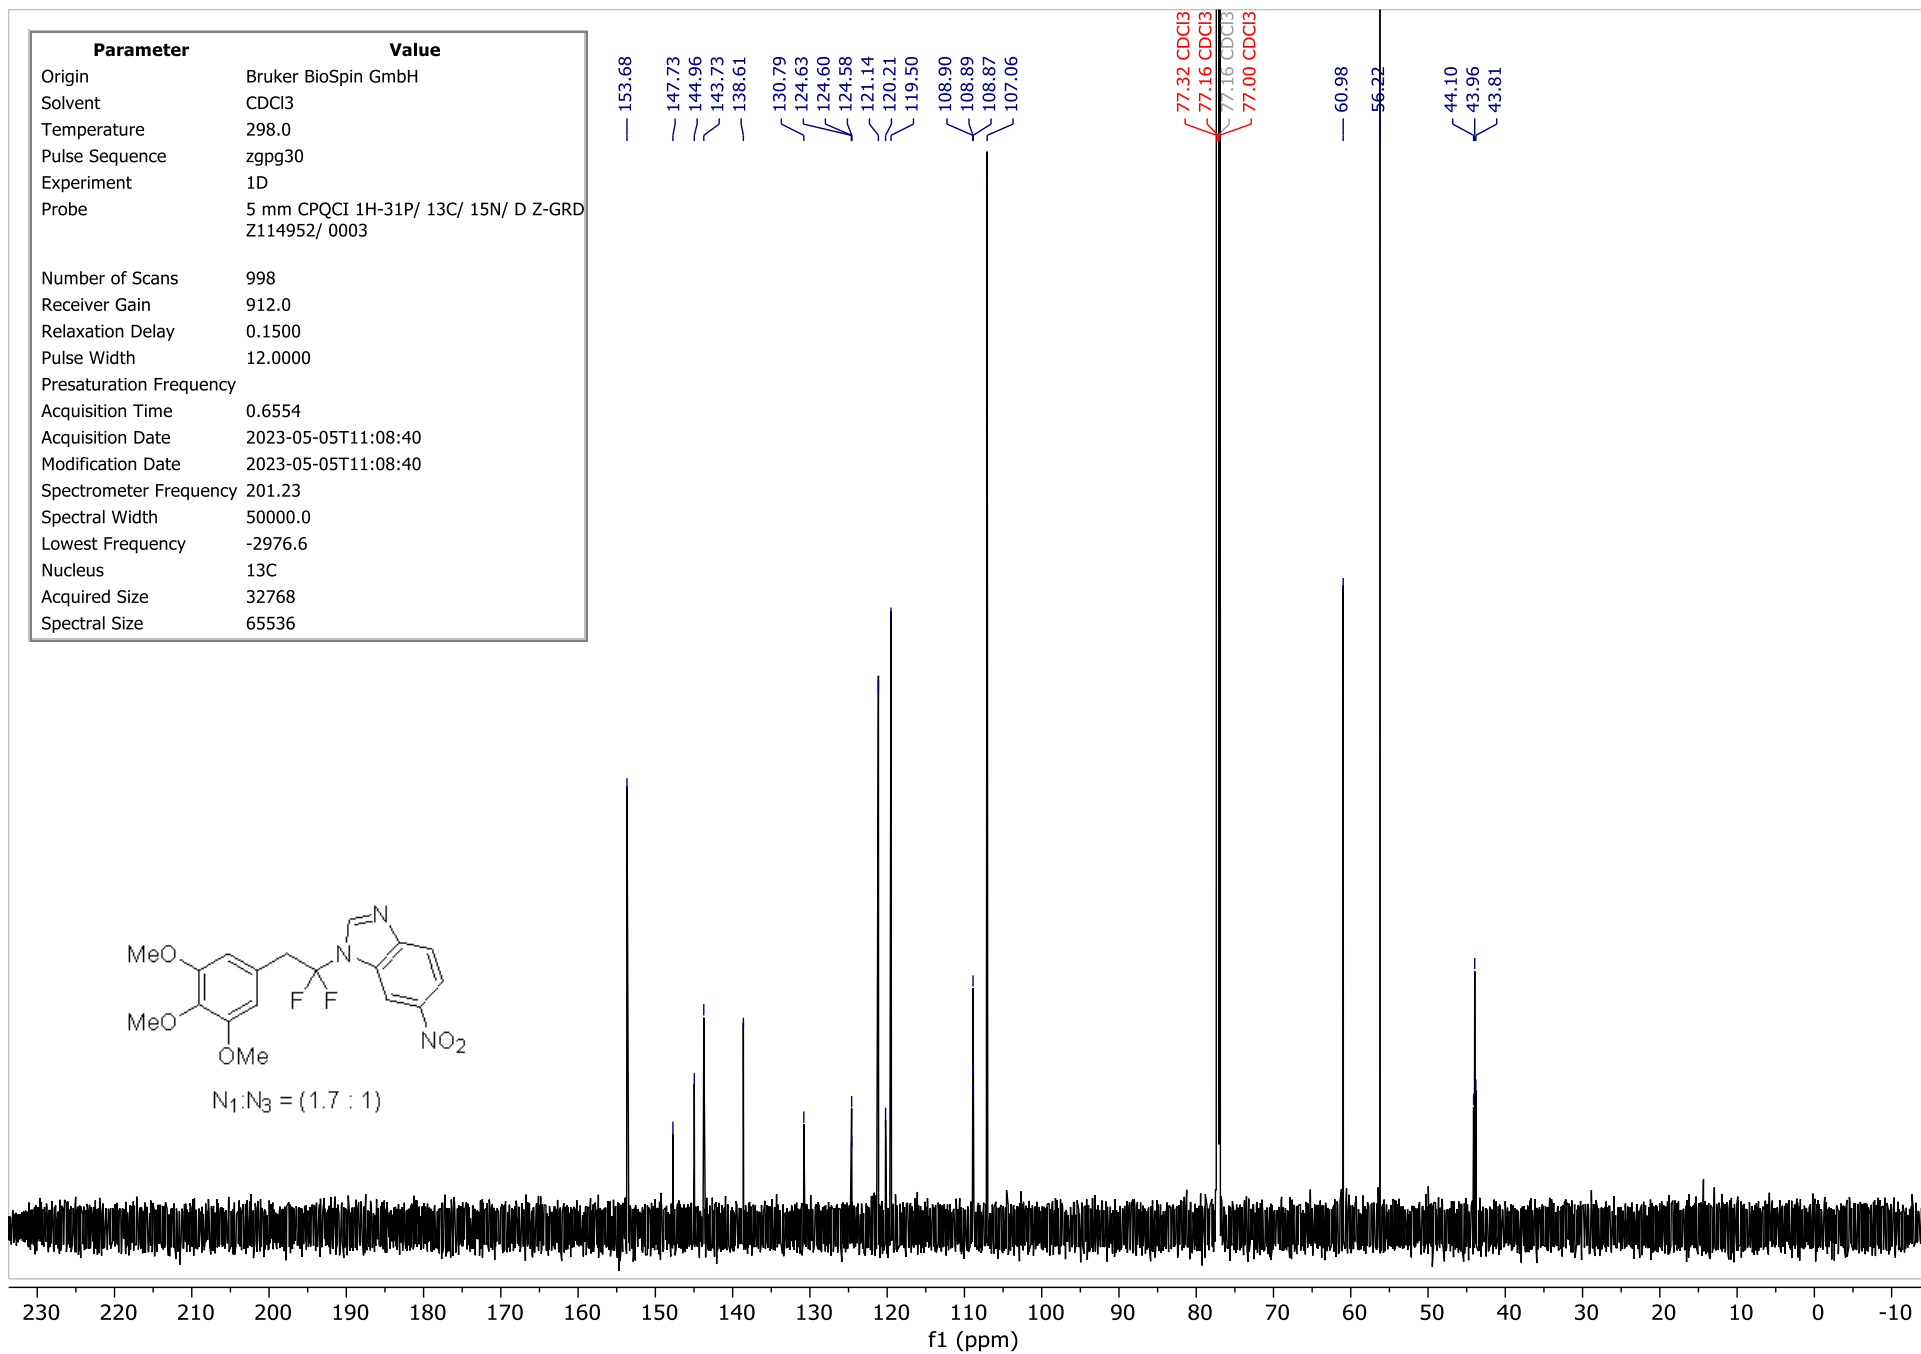

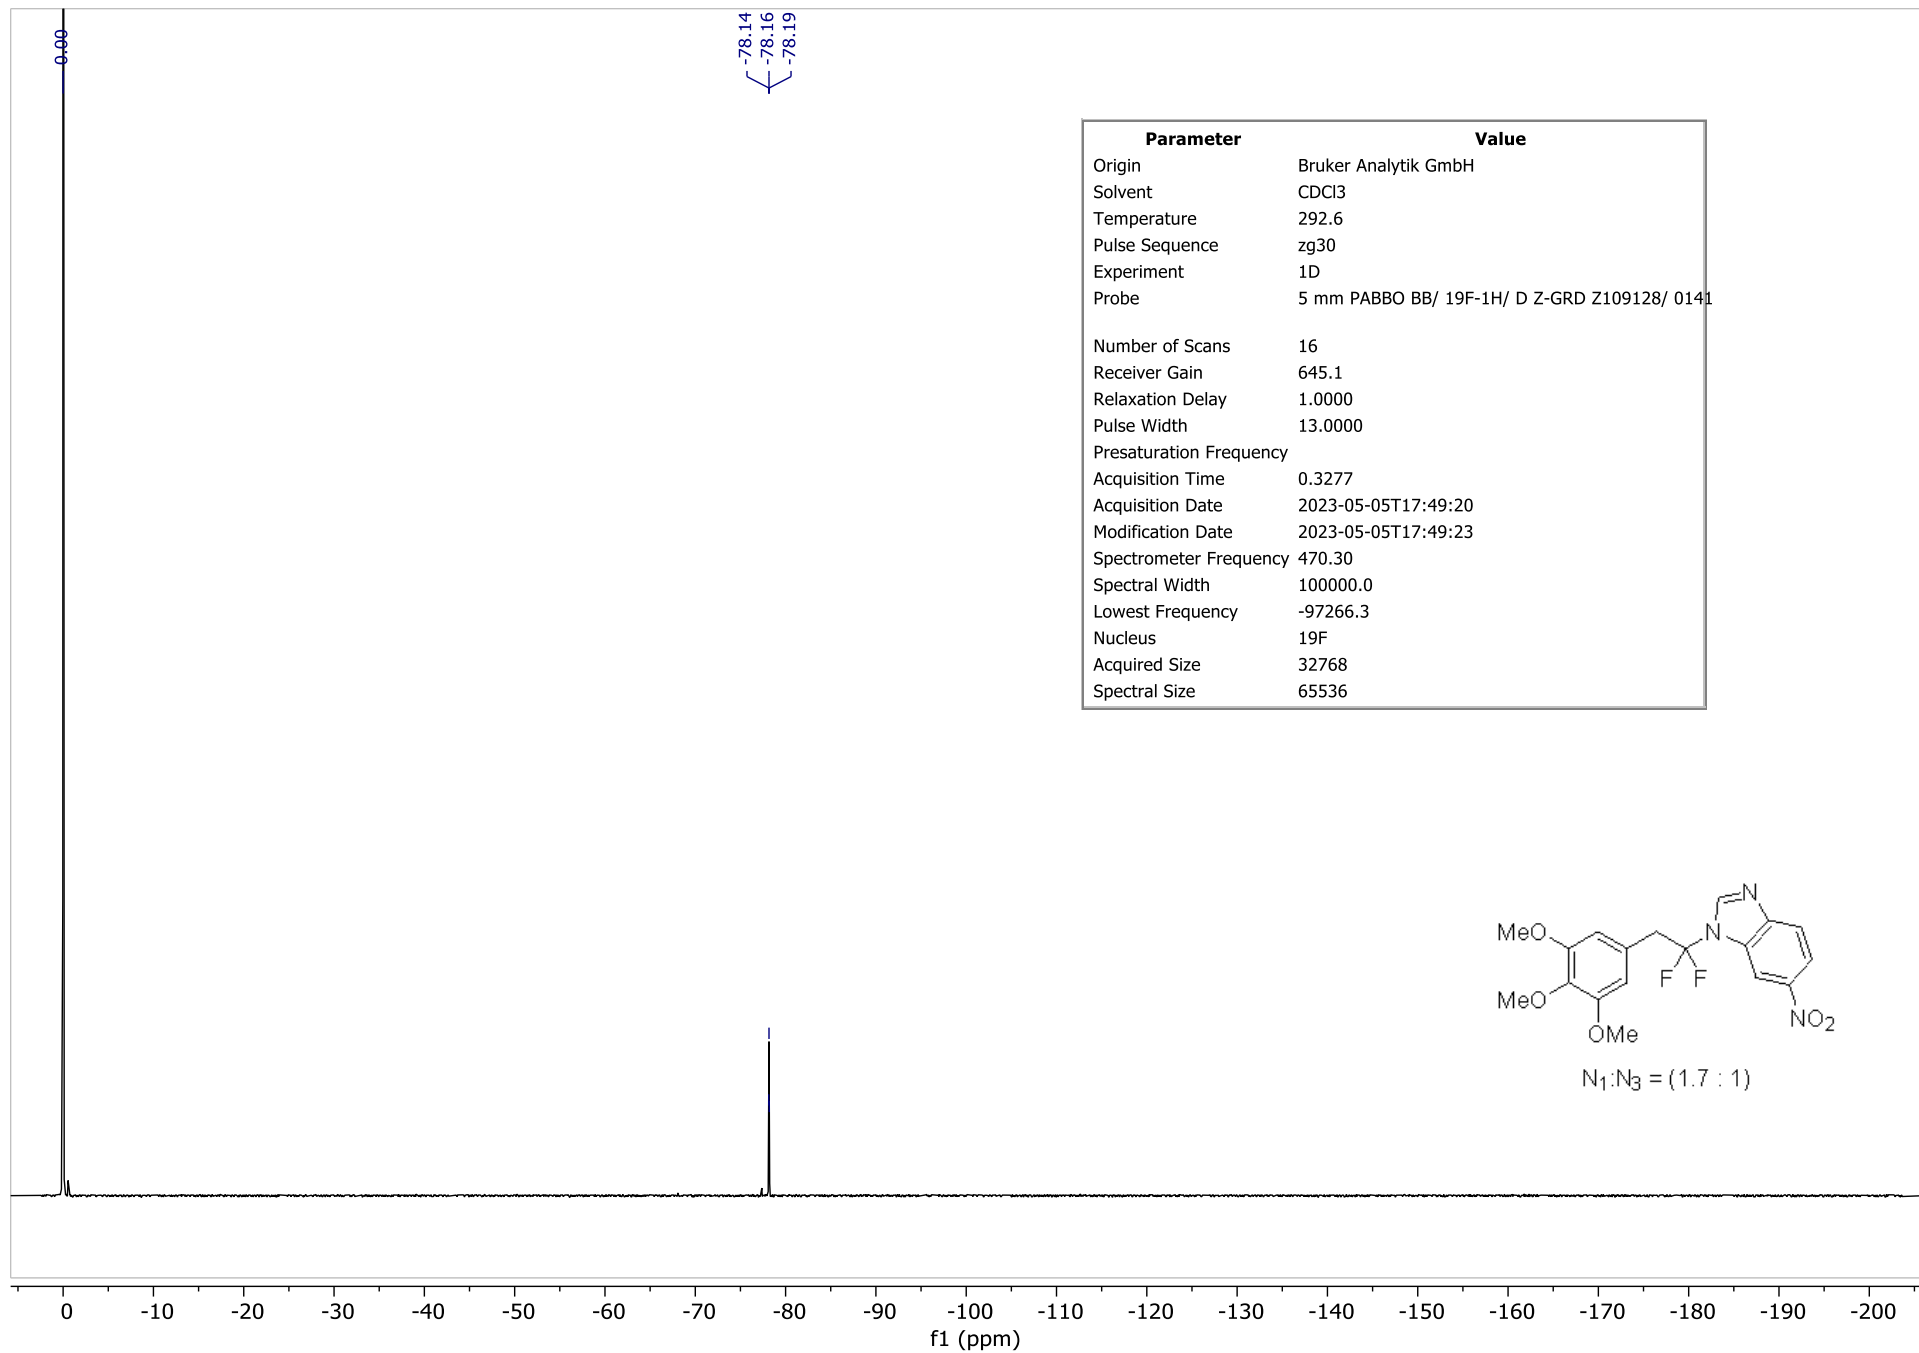

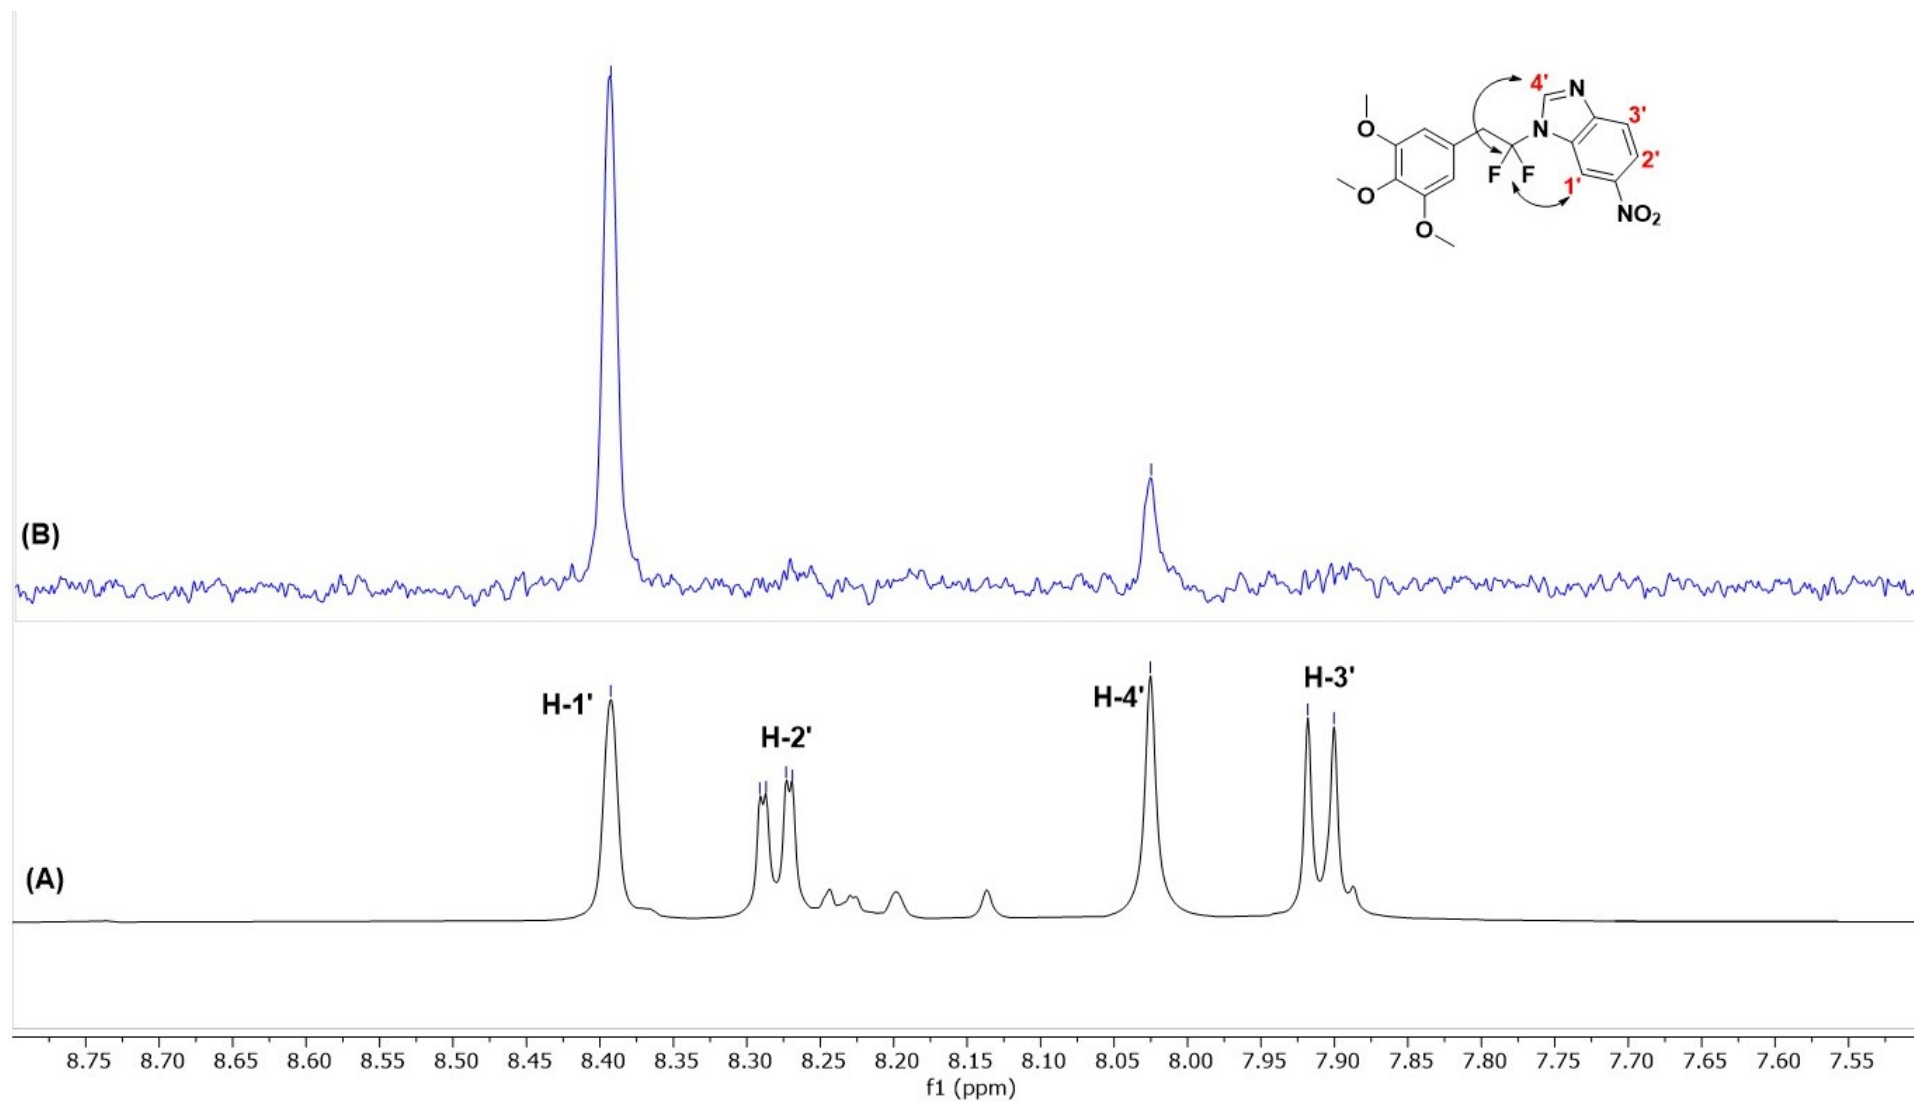

**(A)** Aromatic region of  $^1\text{H}$  NMR spectrum of **11ab**. **(B)**  $^1\text{H}$   $\{^{19}\text{F}\}$  NOE difference spectrum after preirradiation of  $^{19}\text{F}$   $\delta$  -78.16.

NMR spectra for 6- and 5-chloro-1-(1,1-difluoro-2-(3,4,5-trimethoxyphenyl)ethyl)-1H-benzo[d]imidazole (**11ac**)

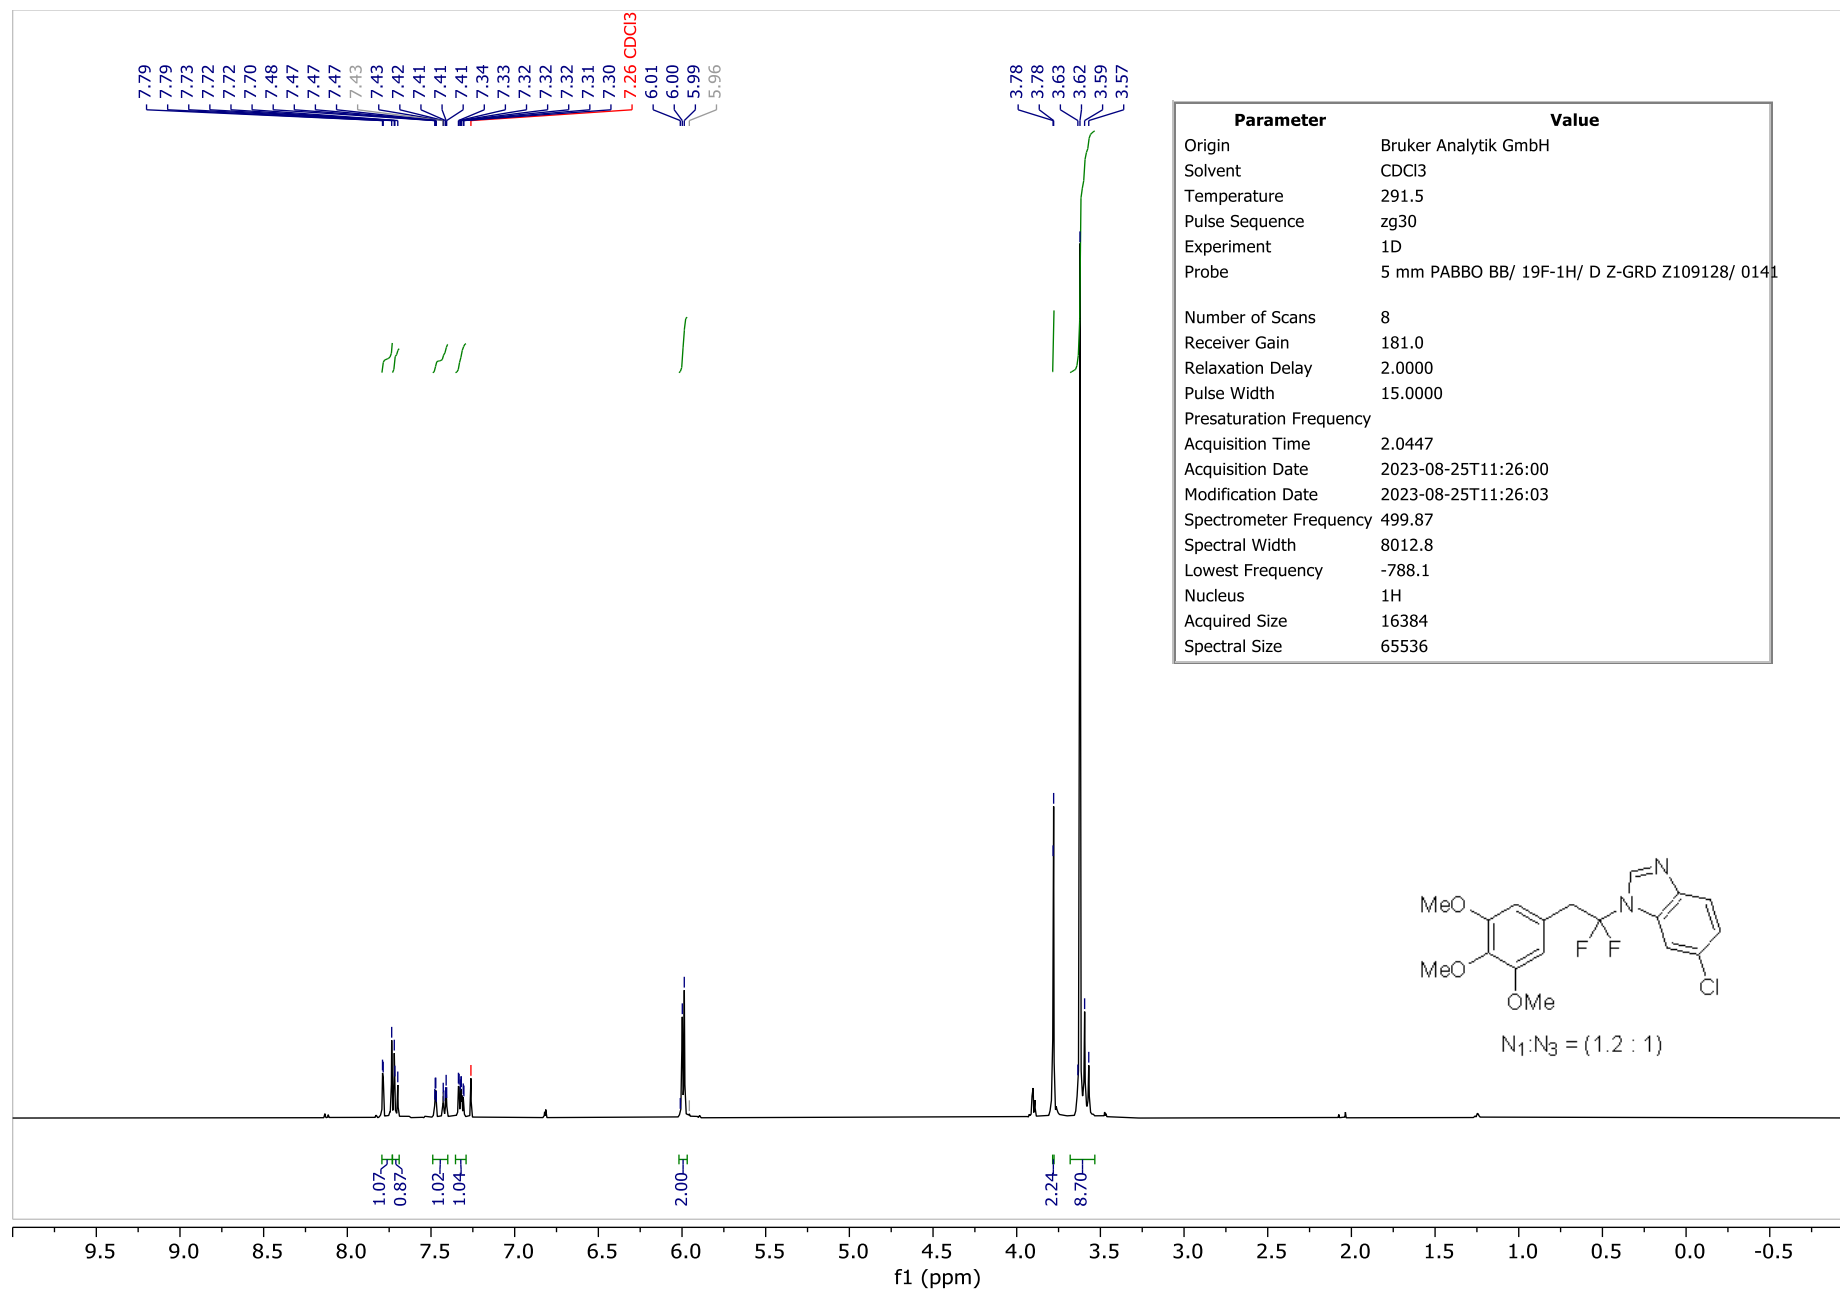

| Parameter               | Value                                        |
|-------------------------|----------------------------------------------|
| Origin                  | UXNMR, Bruker Analytische Messtechnik GmbH   |
| Solvent                 | CDCl <sub>3</sub>                            |
| Temperature             | 292.2                                        |
| Pulse Sequence          | zgpg30                                       |
| Experiment              | 1D                                           |
| Probe                   | 5 mm PABBO BB/ 19F-1H/ D Z-GRD Z109128/ 0141 |
| Number of Scans         | 1961                                         |
| Receiver Gain           | 16384.0                                      |
| Relaxation Delay        | 0.1500                                       |
| Pulse Width             | 12.0000                                      |
| Presaturation Frequency |                                              |
| Acquisition Time        | 0.5456                                       |
| Acquisition Date        | 2023-08-25T11:53:29                          |
| Modification Date       | 2023-08-25T11:53:32                          |
| Spectrometer Frequency  | 125.71                                       |
| Spectral Width          | 30030.0                                      |
| Lowest Frequency        | -1258.6                                      |
| Nucleus                 | <sup>13</sup> C                              |
| Acquired Size           | 16384                                        |
| Spectral Size           | 65536                                        |

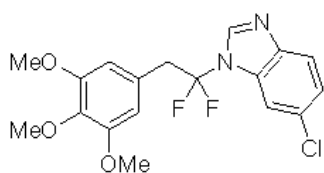

N<sub>1</sub>:N<sub>3</sub> = (1.2 : 1)

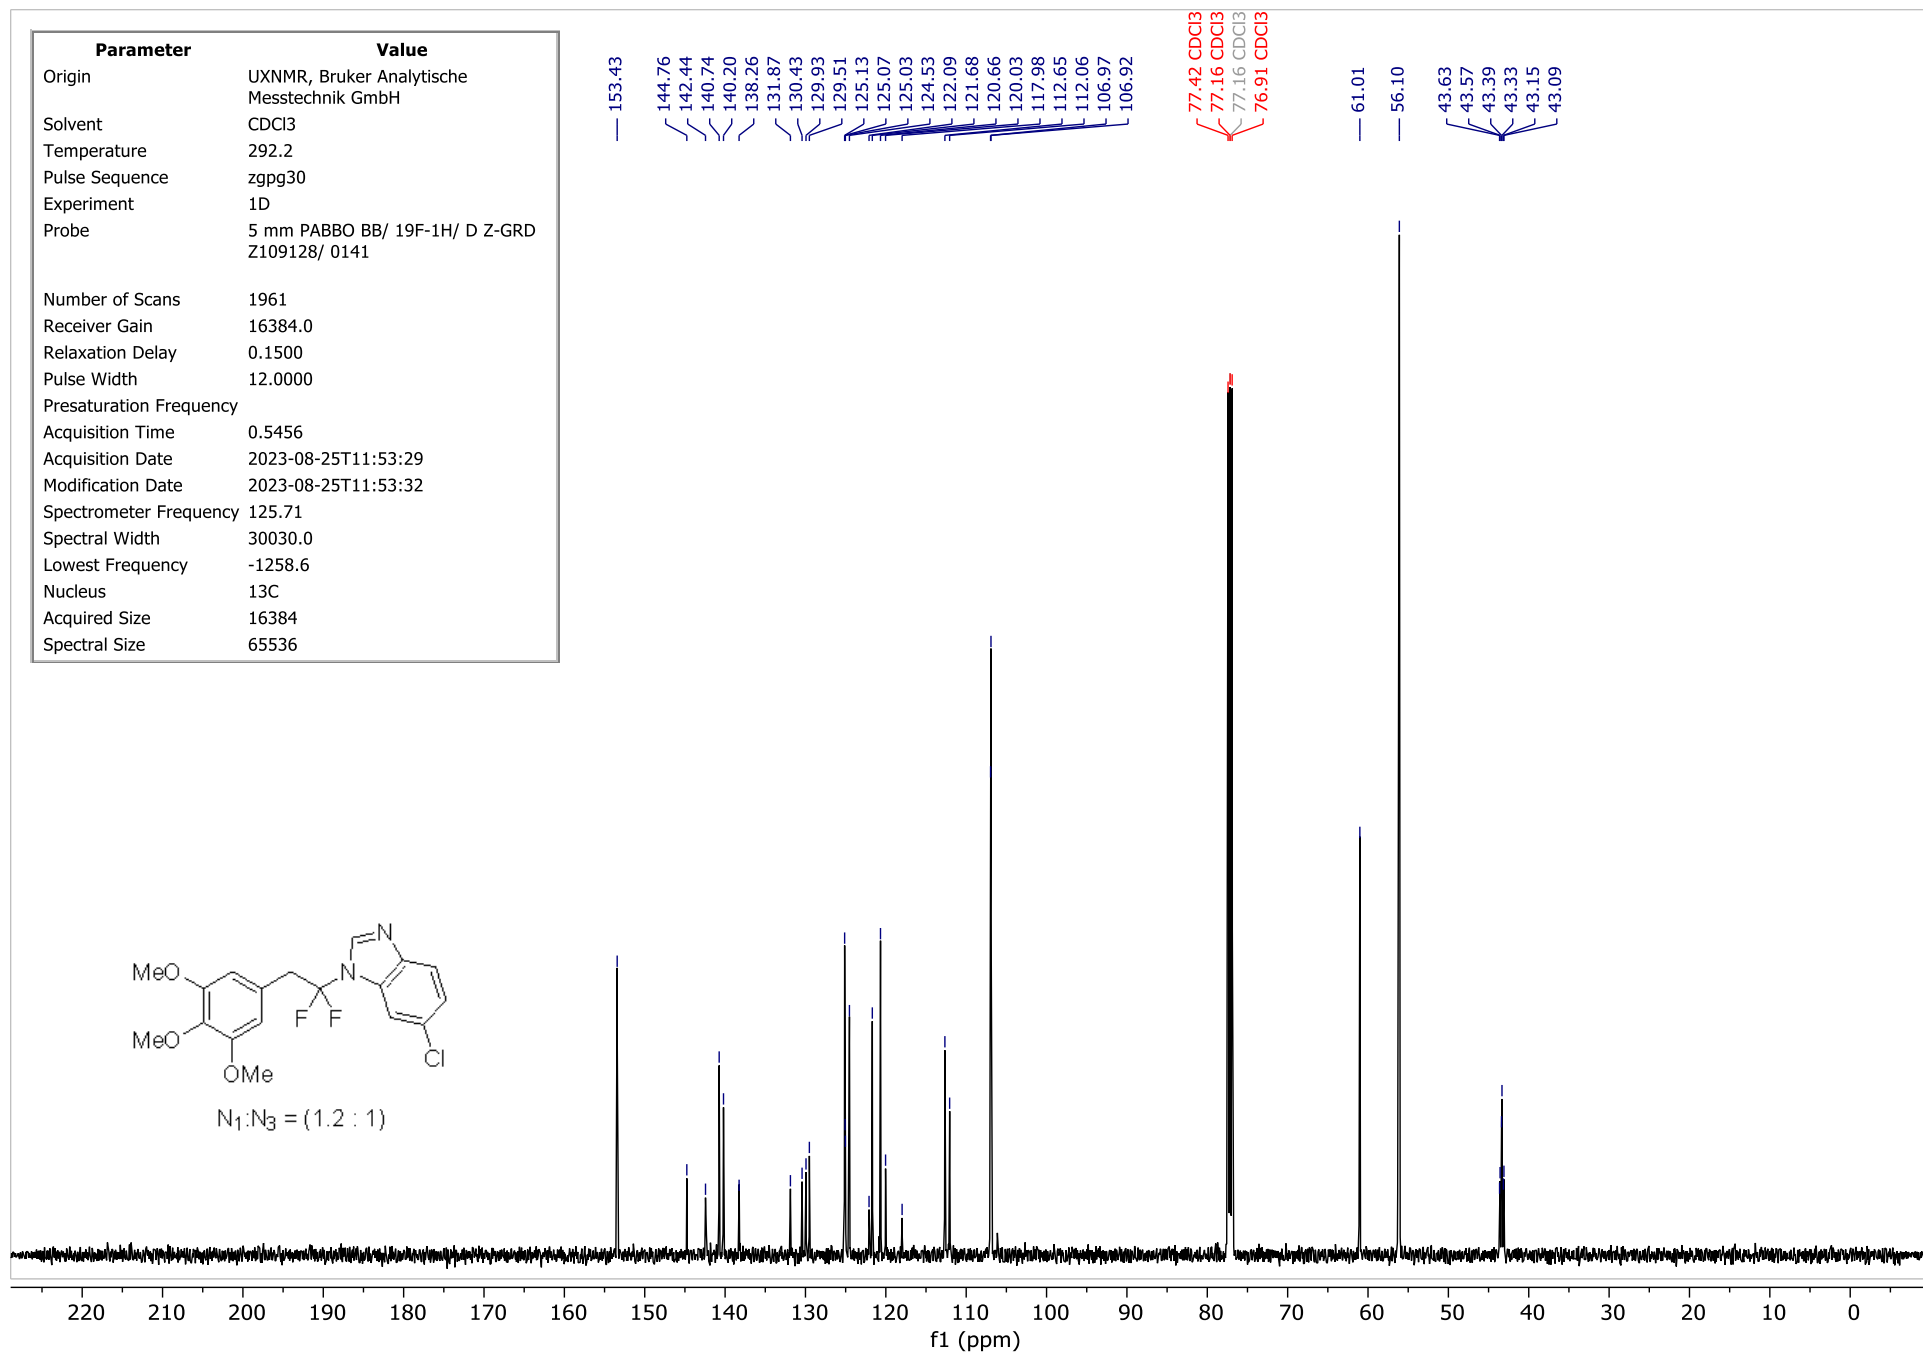

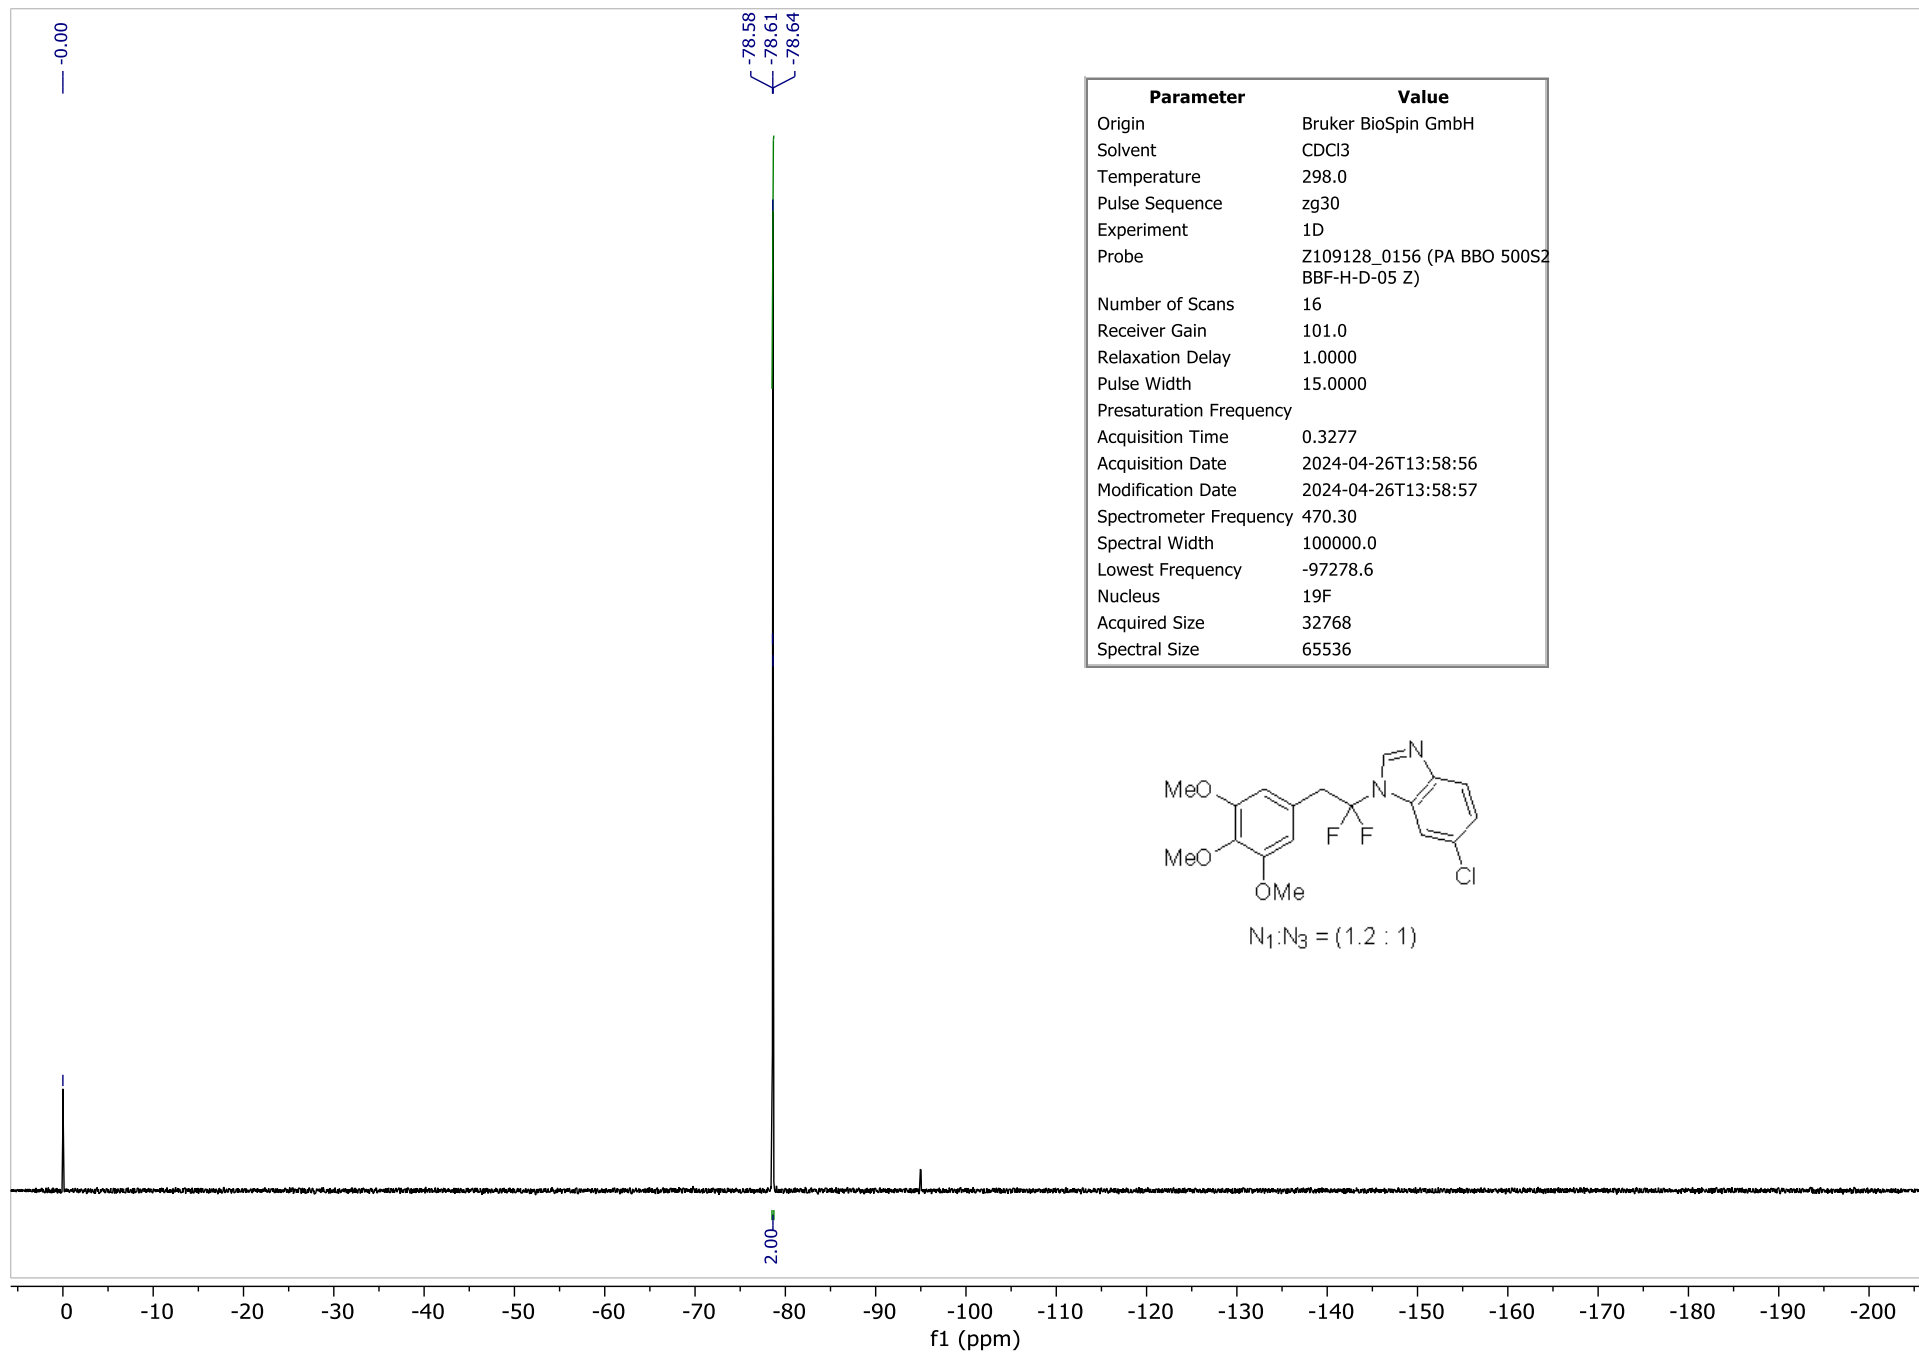



NMR spectra for 6- and 5-bromo-1-(1,1-difluoro-2-(3,4,5-trimethoxyphenyl)ethyl)-1H-benzo[d]imidazole (**11ad**)

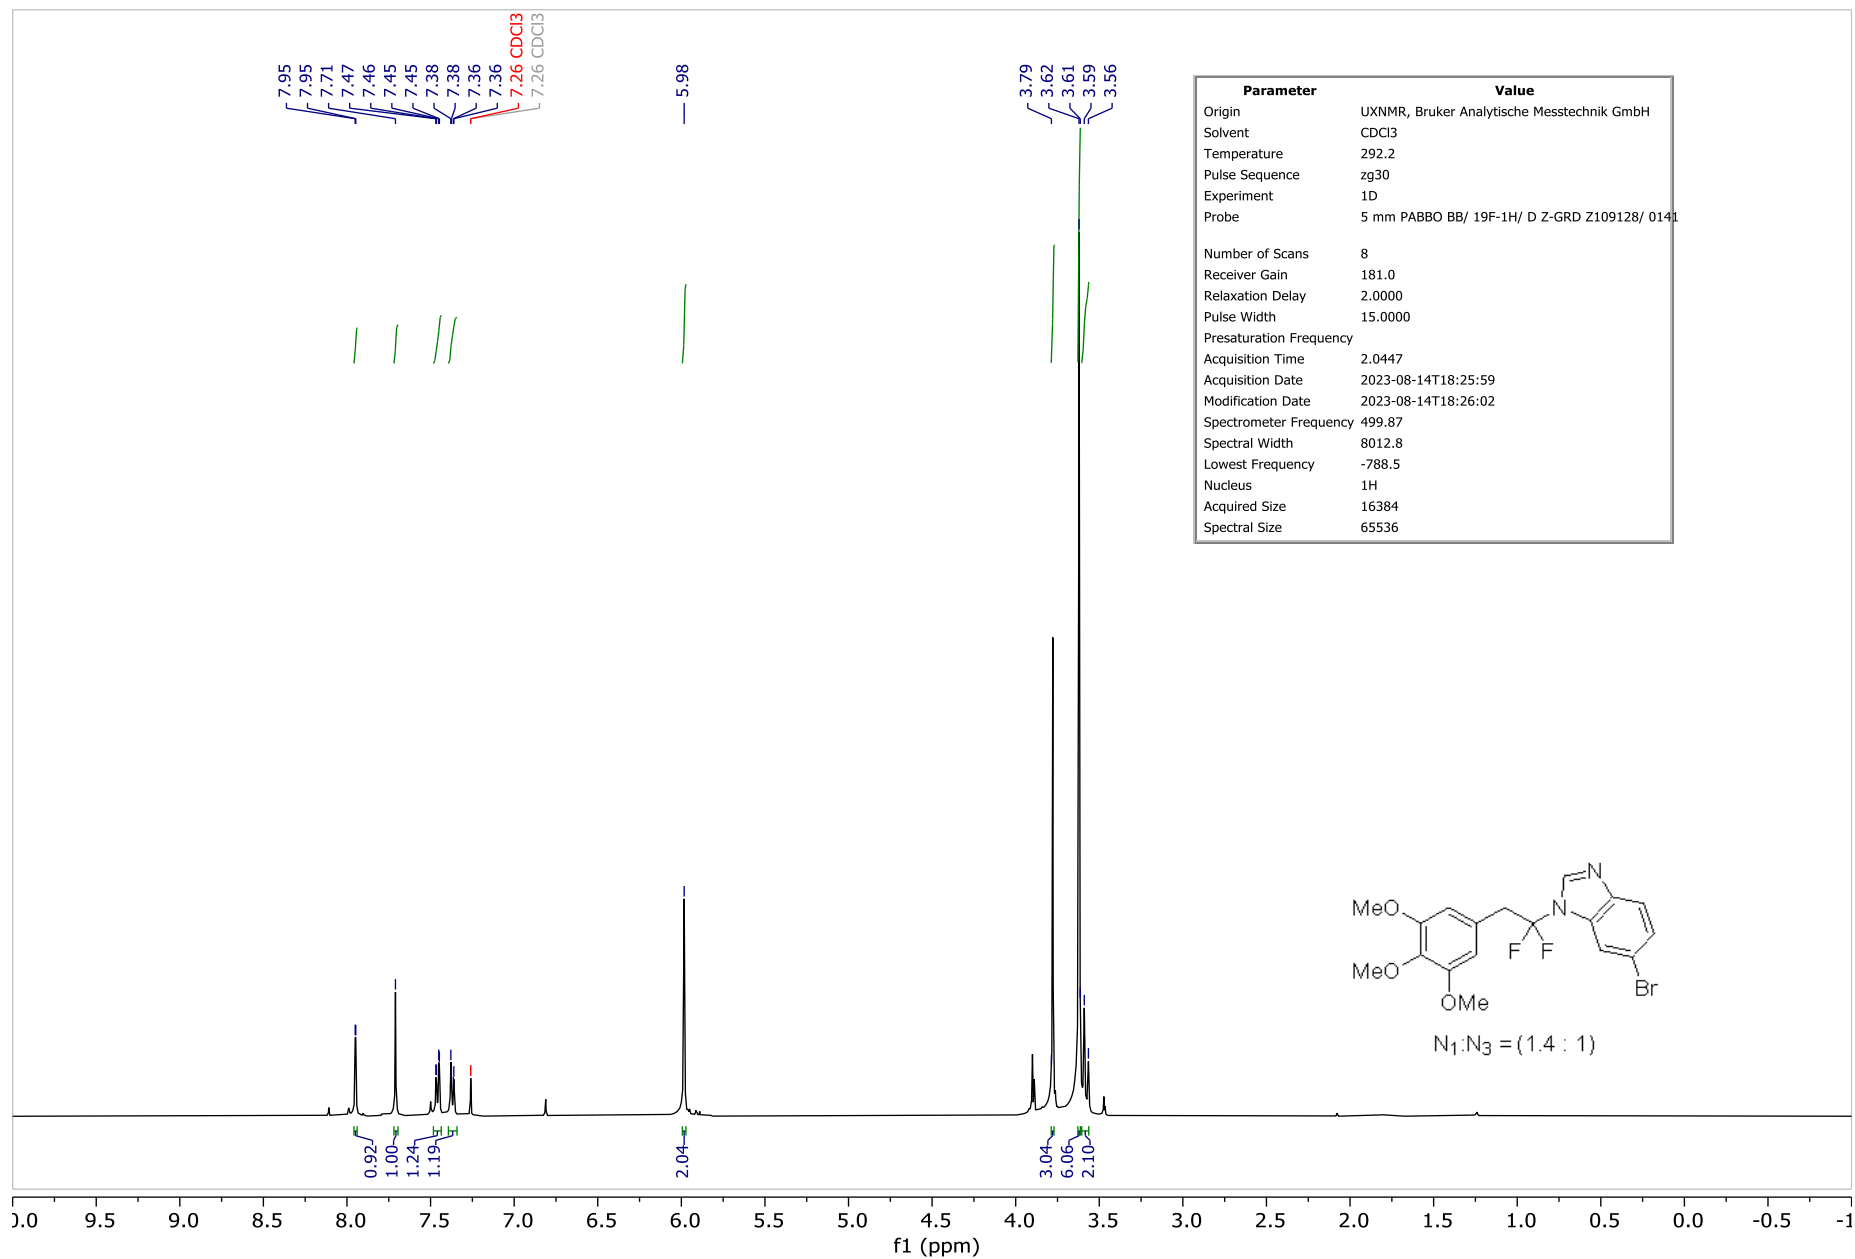

| Parameter               | Value                                           |
|-------------------------|-------------------------------------------------|
| Origin                  | Bruker Analytik GmbH                            |
| Solvent                 | CDCl <sub>3</sub>                               |
| Temperature             | 292.9                                           |
| Pulse Sequence          | zgpg30                                          |
| Experiment              | 1D                                              |
| Probe                   | 5 mm PABBO BB/ 19F-1H/ D Z-GRD<br>Z109128/ 0141 |
| Number of Scans         | 1044                                            |
| Receiver Gain           | 16384.0                                         |
| Relaxation Delay        | 0.1500                                          |
| Pulse Width             | 12.0000                                         |
| Presaturation Frequency |                                                 |
| Acquisition Time        | 0.5456                                          |
| Acquisition Date        | 2023-08-14T18:44:36                             |
| Modification Date       | 2023-08-14T18:44:39                             |
| Spectrometer Frequency  | 125.71                                          |
| Spectral Width          | 30030.0                                         |
| Lowest Frequency        | -1259.0                                         |
| Nucleus                 | <sup>13</sup> C                                 |
| Acquired Size           | 16384                                           |
| Spectral Size           | 65536                                           |

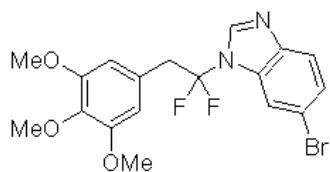

N<sub>1</sub>:N<sub>3</sub> = (1.4 : 1)

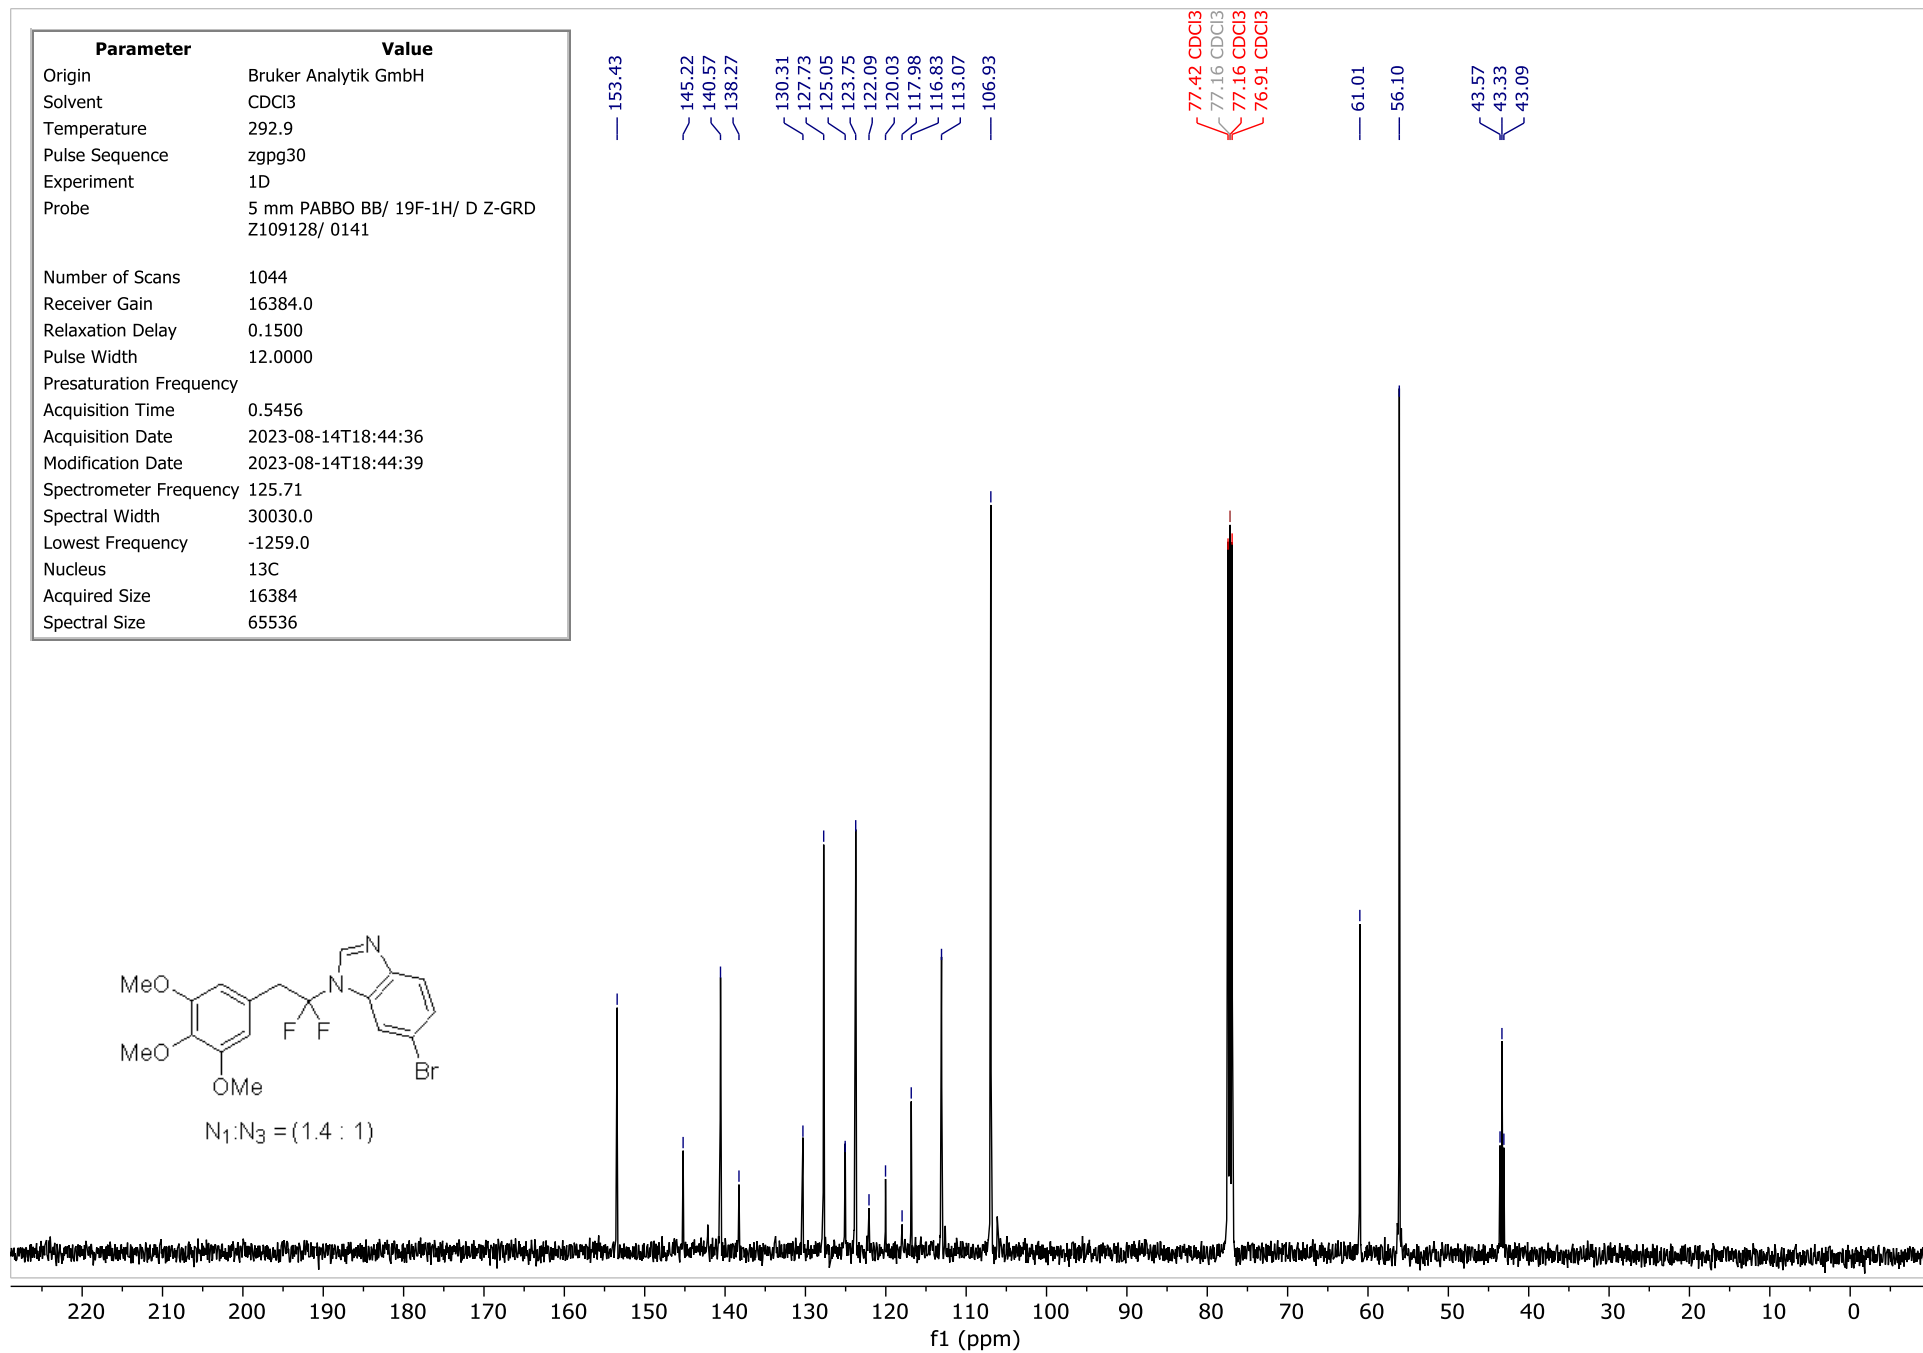

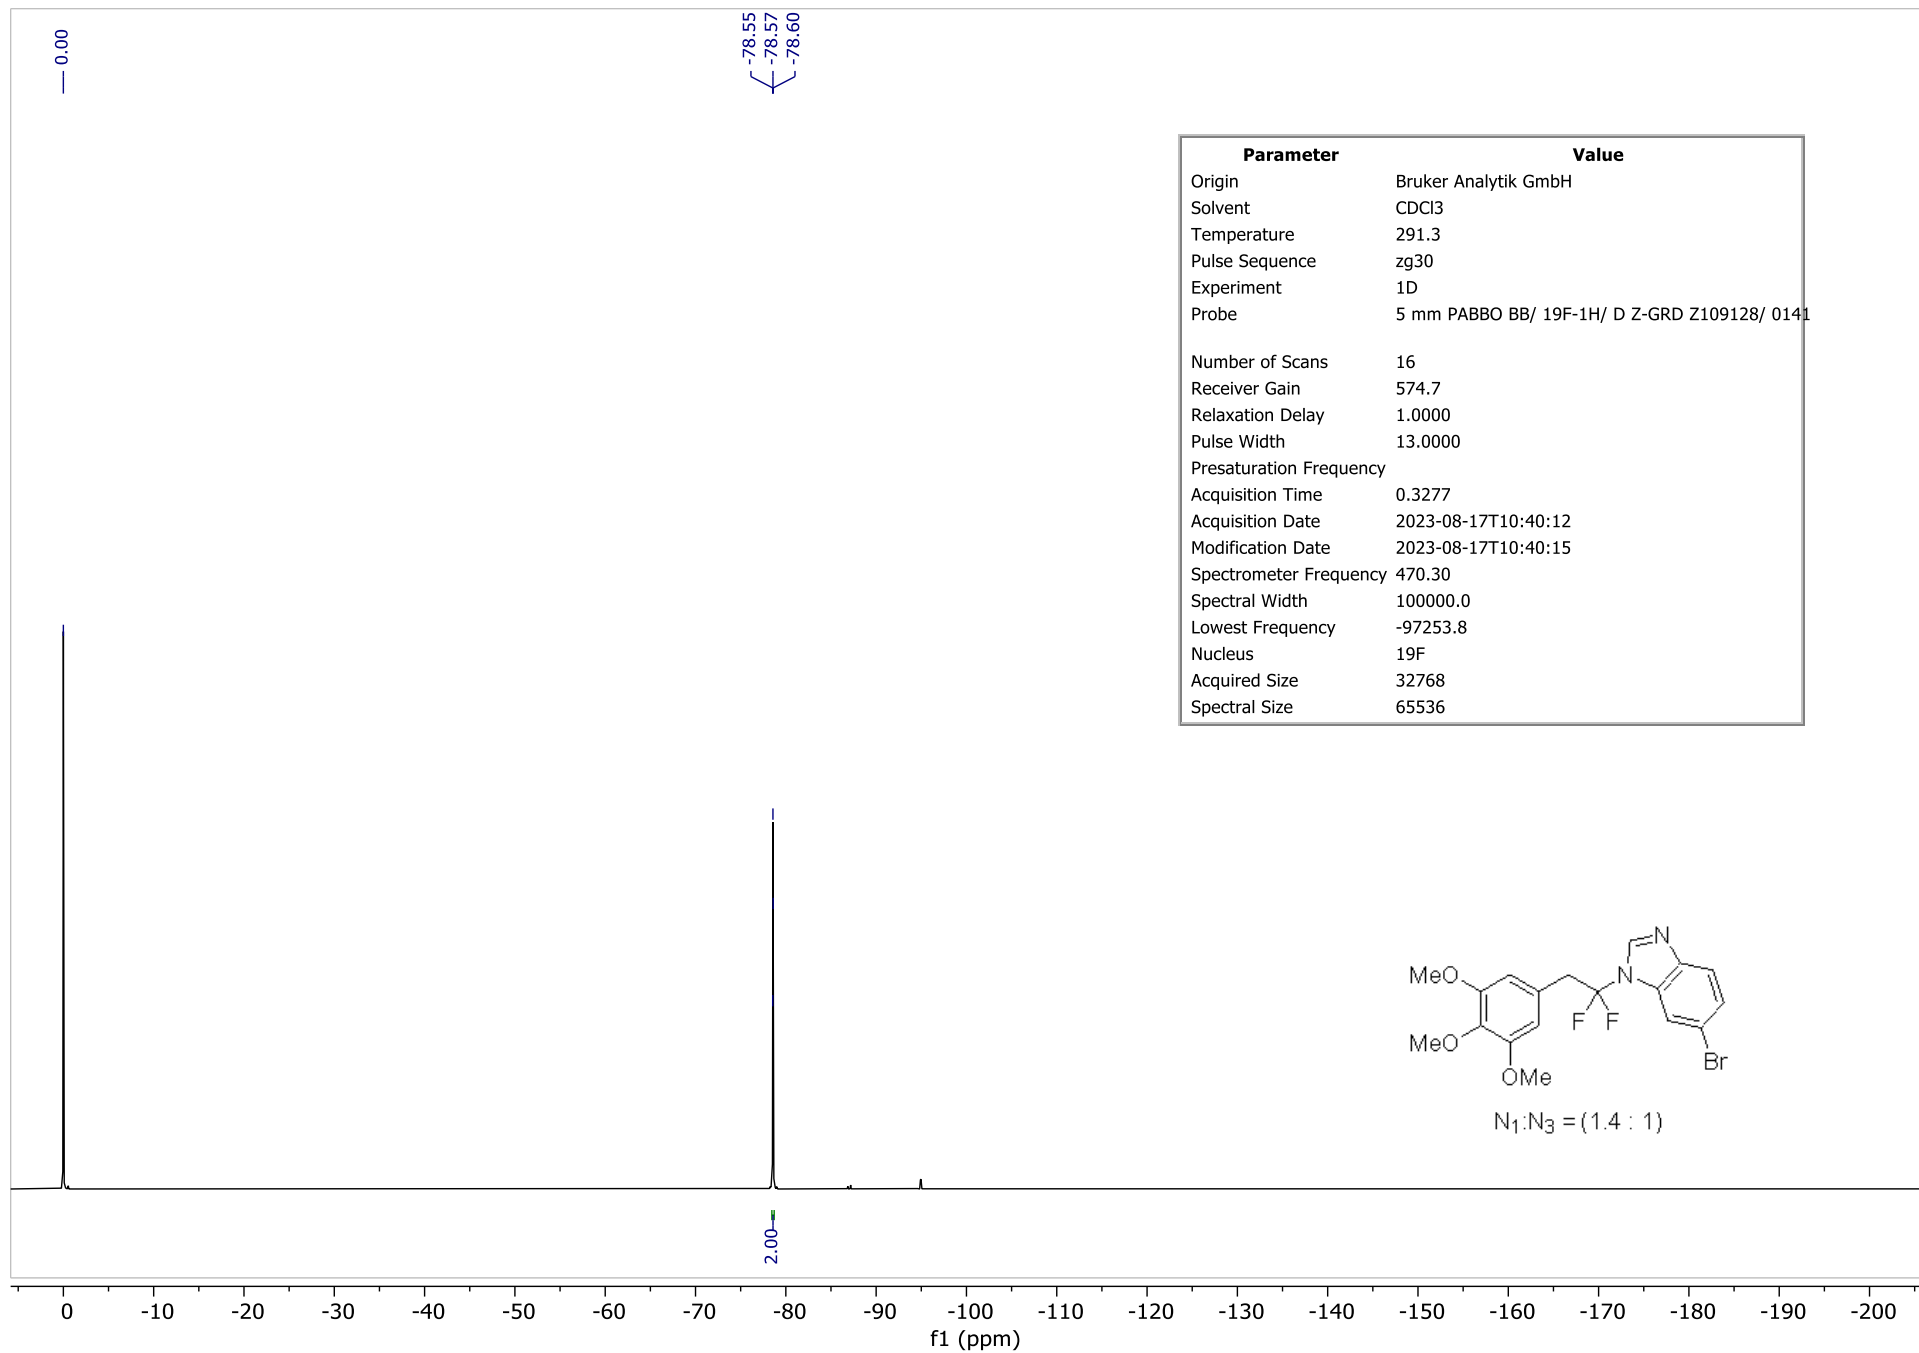

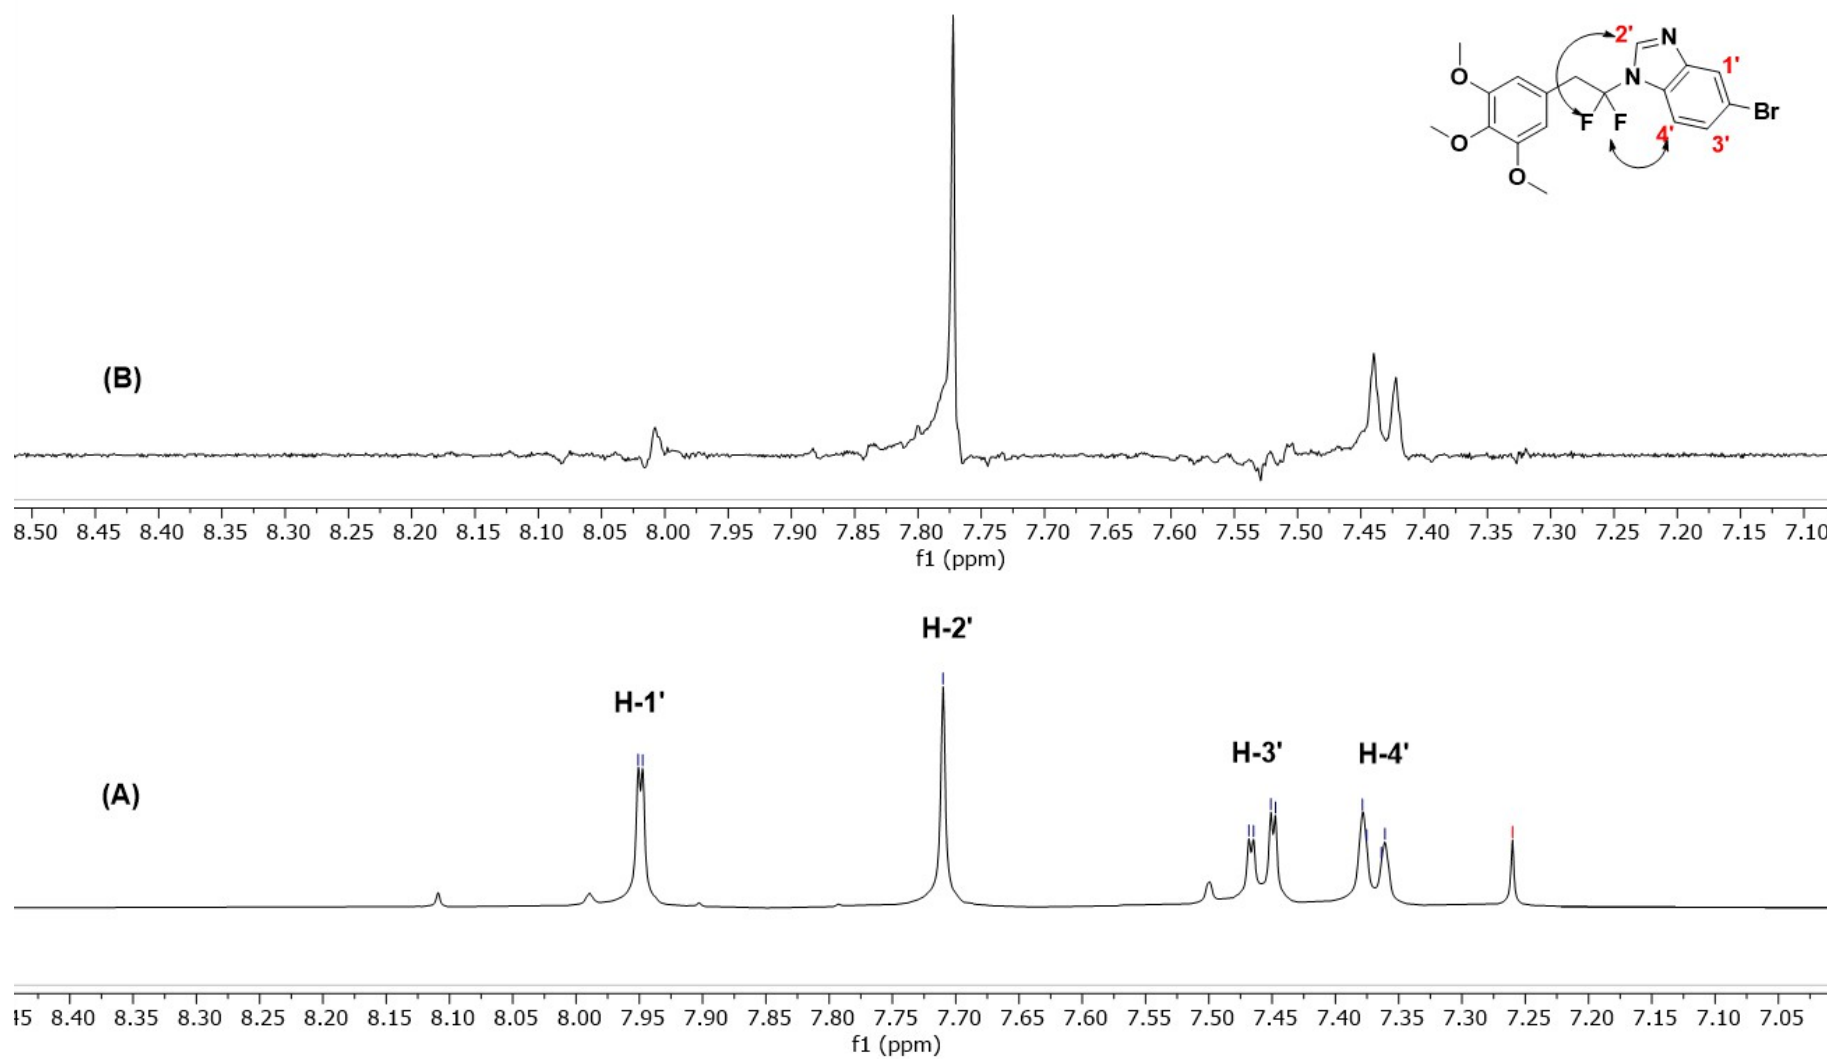

**(A)** Aromatic region of  $^1\text{H}$  NMR spectrum of **11ad**. **(B)**  $^1\text{H}$   $\{^{19}\text{F}\}$  NOE difference spectrum after preirradiation of  $^{19}\text{F}$   $\delta$  -78.57.

NMR spectra for methyl 1-(1,1-difluoro-2-(3,4,5-trimethoxyphenyl)ethyl)-1*H*-benzo[d]imidazole-6- and -5-carboxylate (**11ae**)

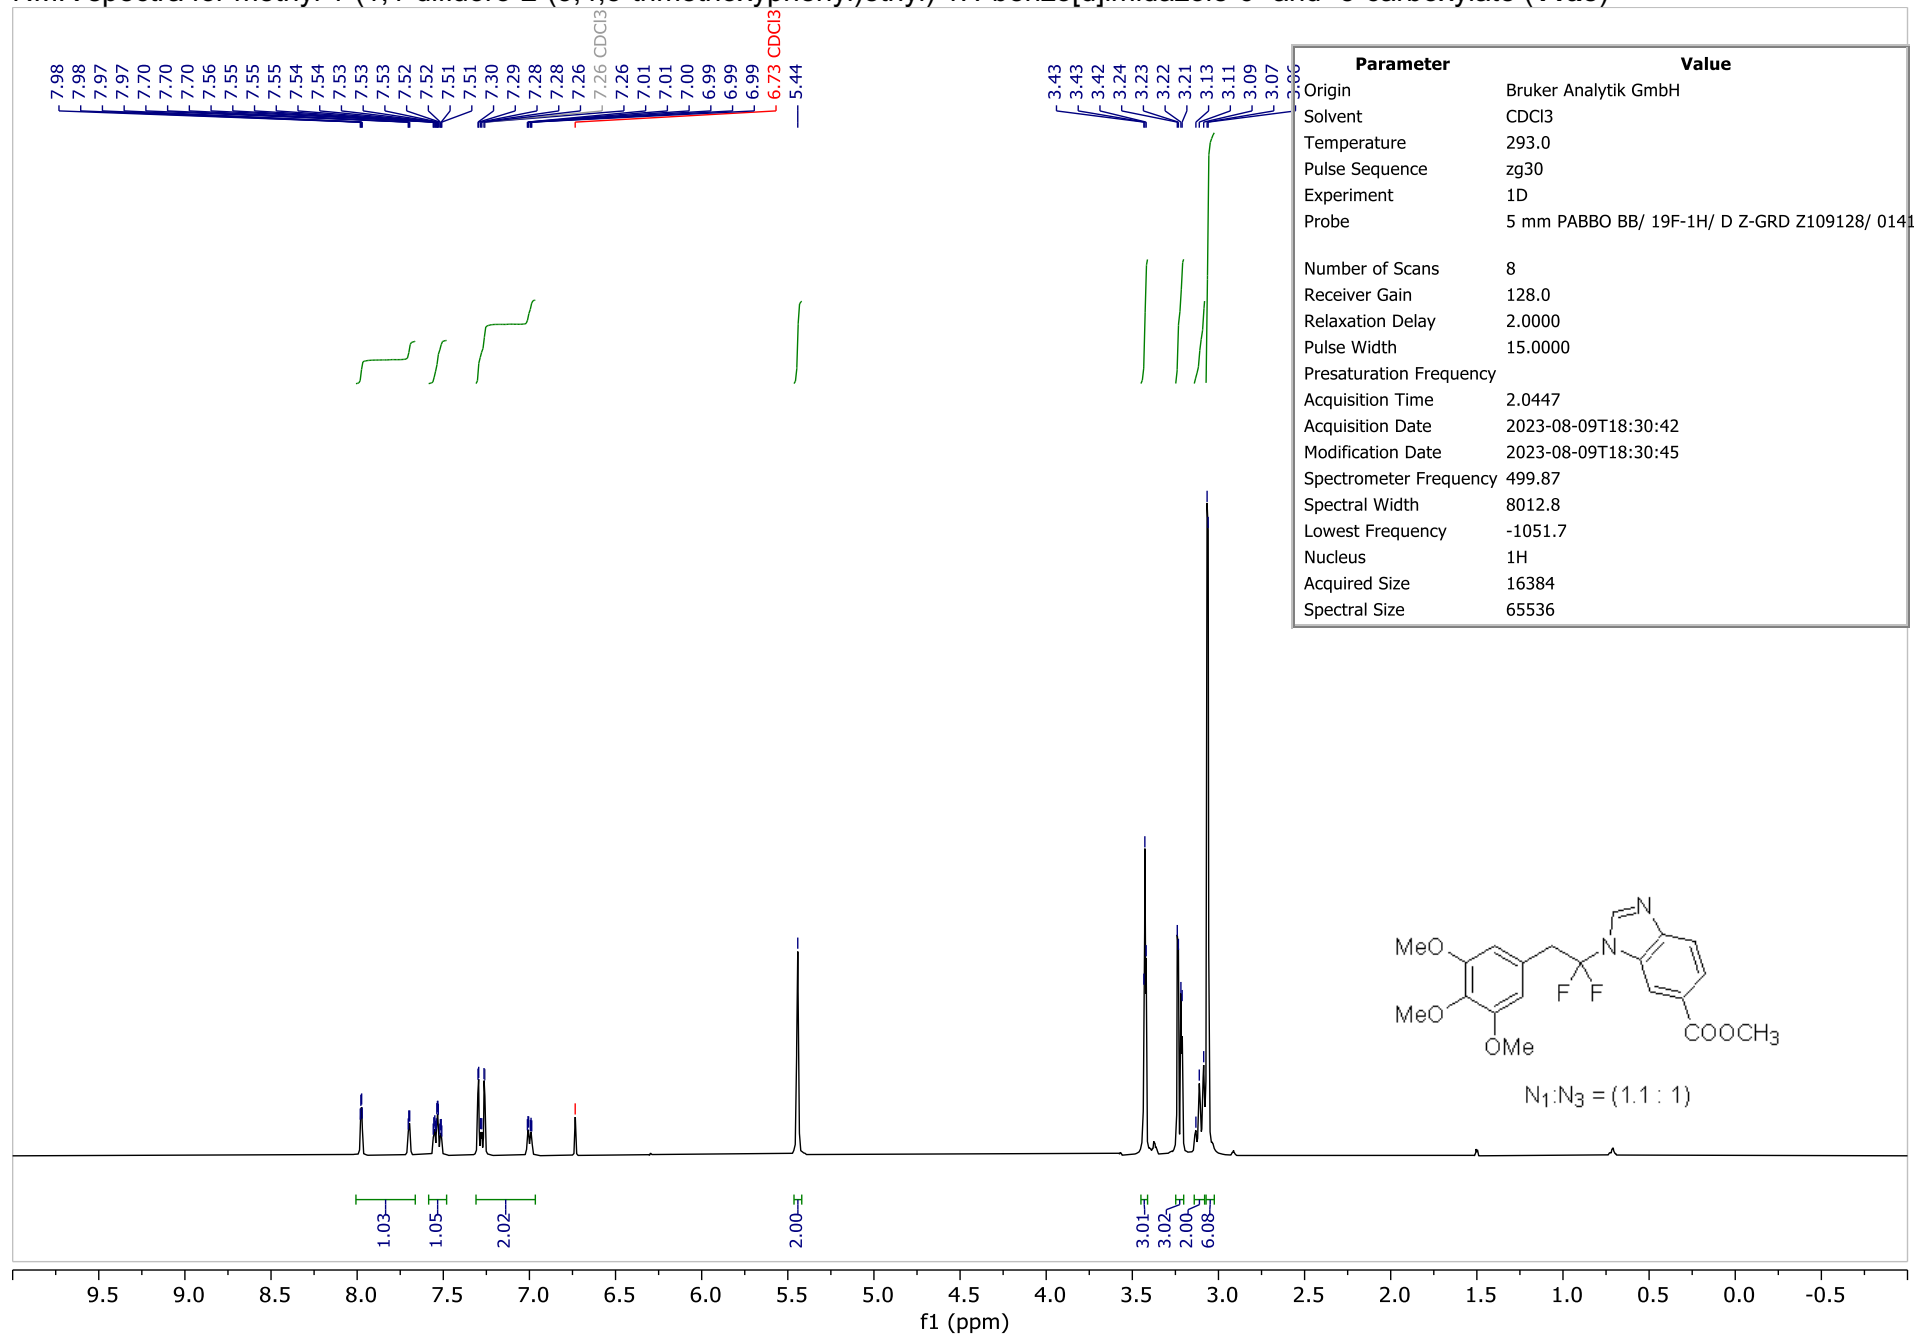

| Parameter               | Value                                              |
|-------------------------|----------------------------------------------------|
| Origin                  | UXNMR, Bruker<br>Analytische Messtechnik<br>GmbH   |
| Solvent                 | CDCl <sub>3</sub>                                  |
| Temperature             | 293.6                                              |
| Pulse Sequence          | zgpg30                                             |
| Experiment              | 1D                                                 |
| Probe                   | 5 mm PABBO BB/<br>19F-1H/ D Z-GRD<br>Z109128/ 0141 |
| Number of Scans         | 1024                                               |
| Receiver Gain           | 16384.0                                            |
| Relaxation Delay        | 0.1500                                             |
| Pulse Width             | 12.0000                                            |
| Presaturation Frequency |                                                    |
| Acquisition Time        | 0.5456                                             |
| Acquisition Date        | 2023-08-09T18:45:54                                |
| Modification Date       | 2023-08-09T18:45:57                                |
| Spectrometer Frequency  | 125.71                                             |
| Spectral Width          | 30030.0                                            |
| Lowest Frequency        | -1259.0                                            |
| Nucleus                 | 13C                                                |
| Acquired Size           | 16384                                              |
| Spectral Size           | 65536                                              |

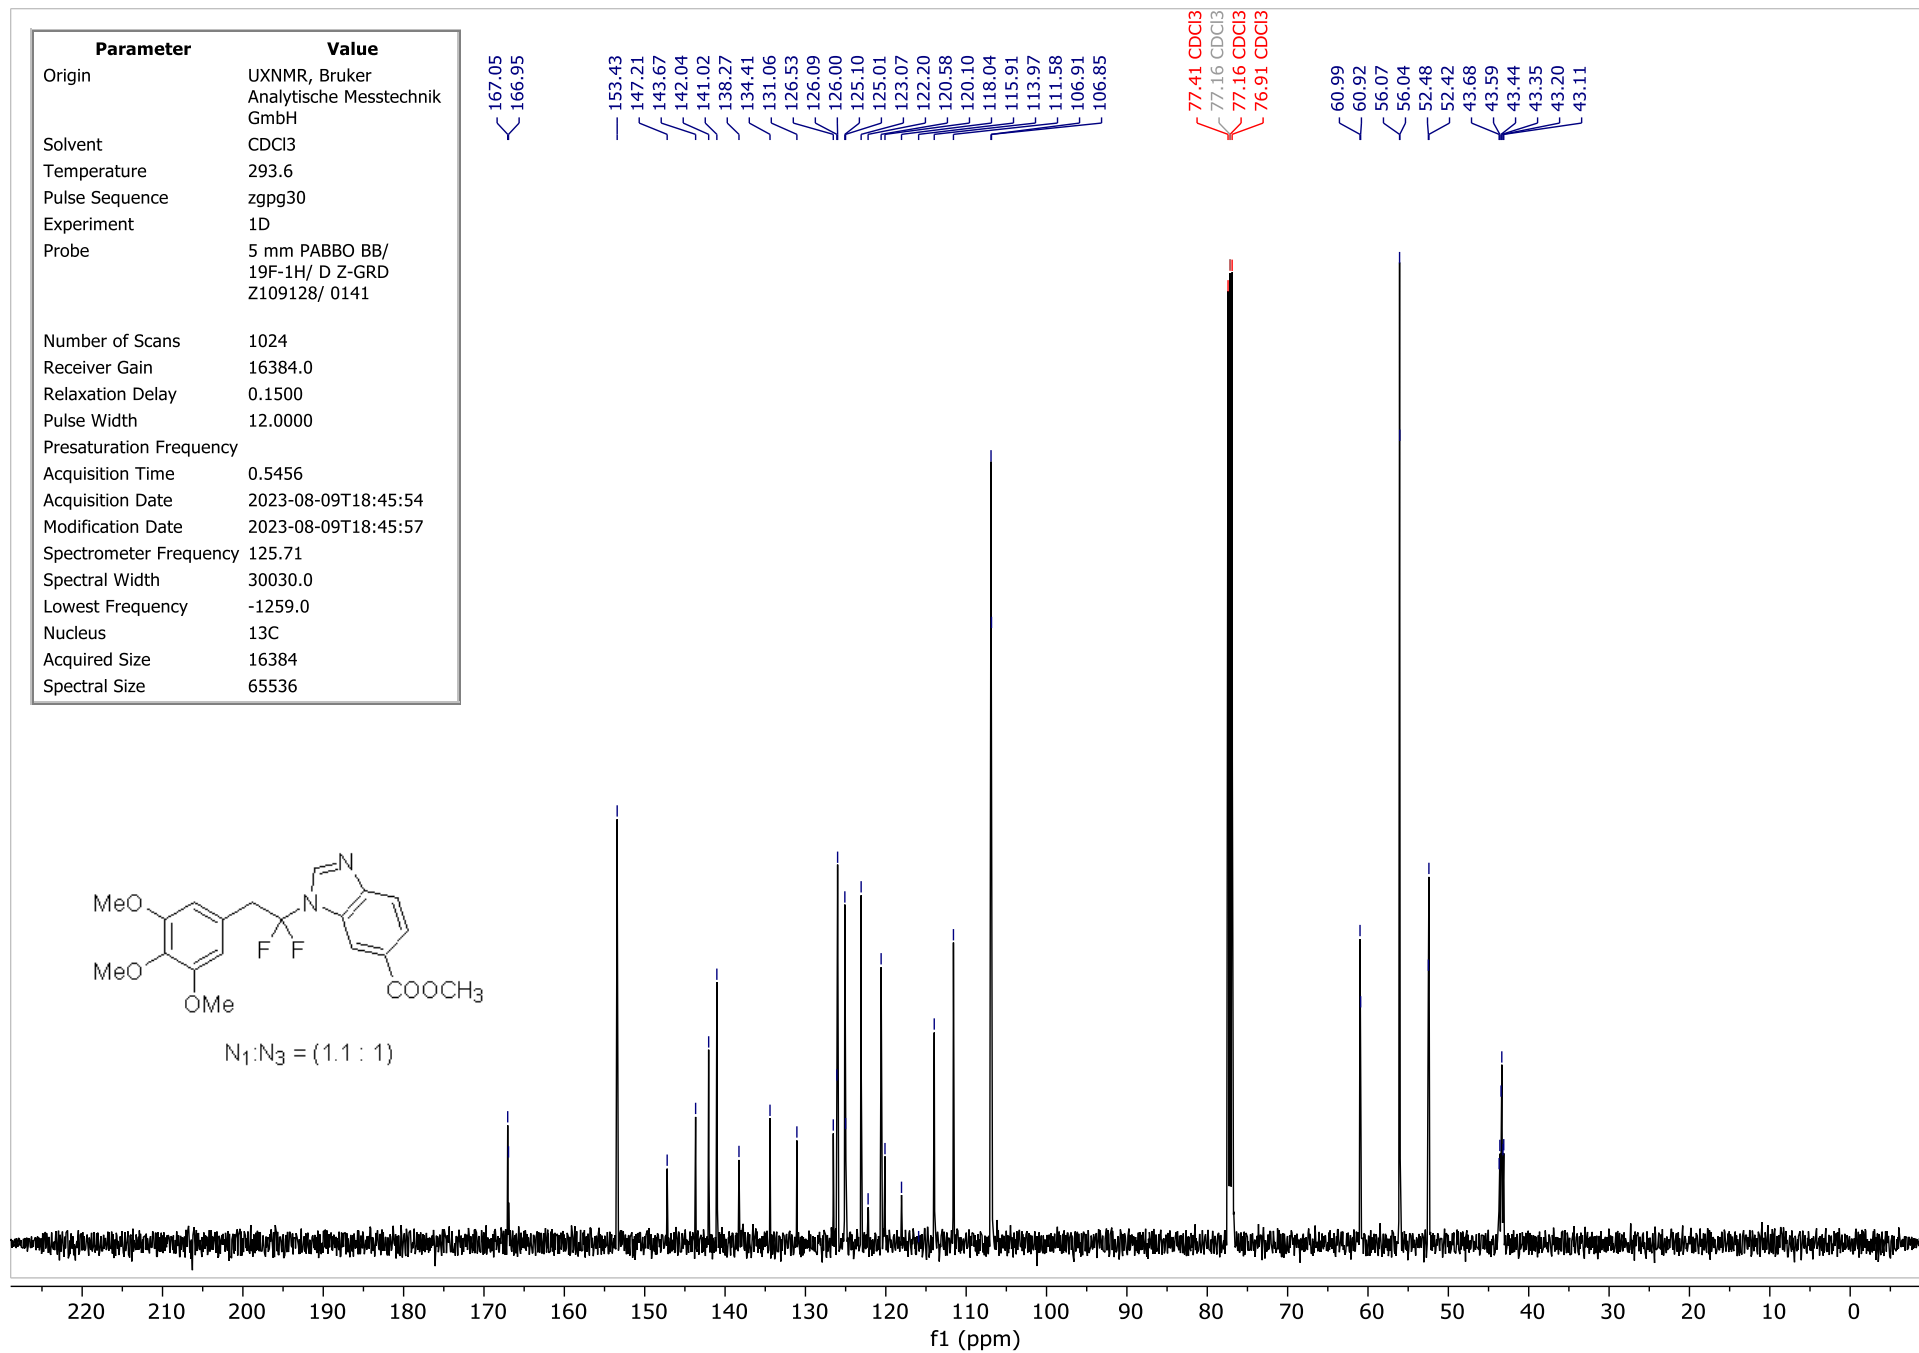

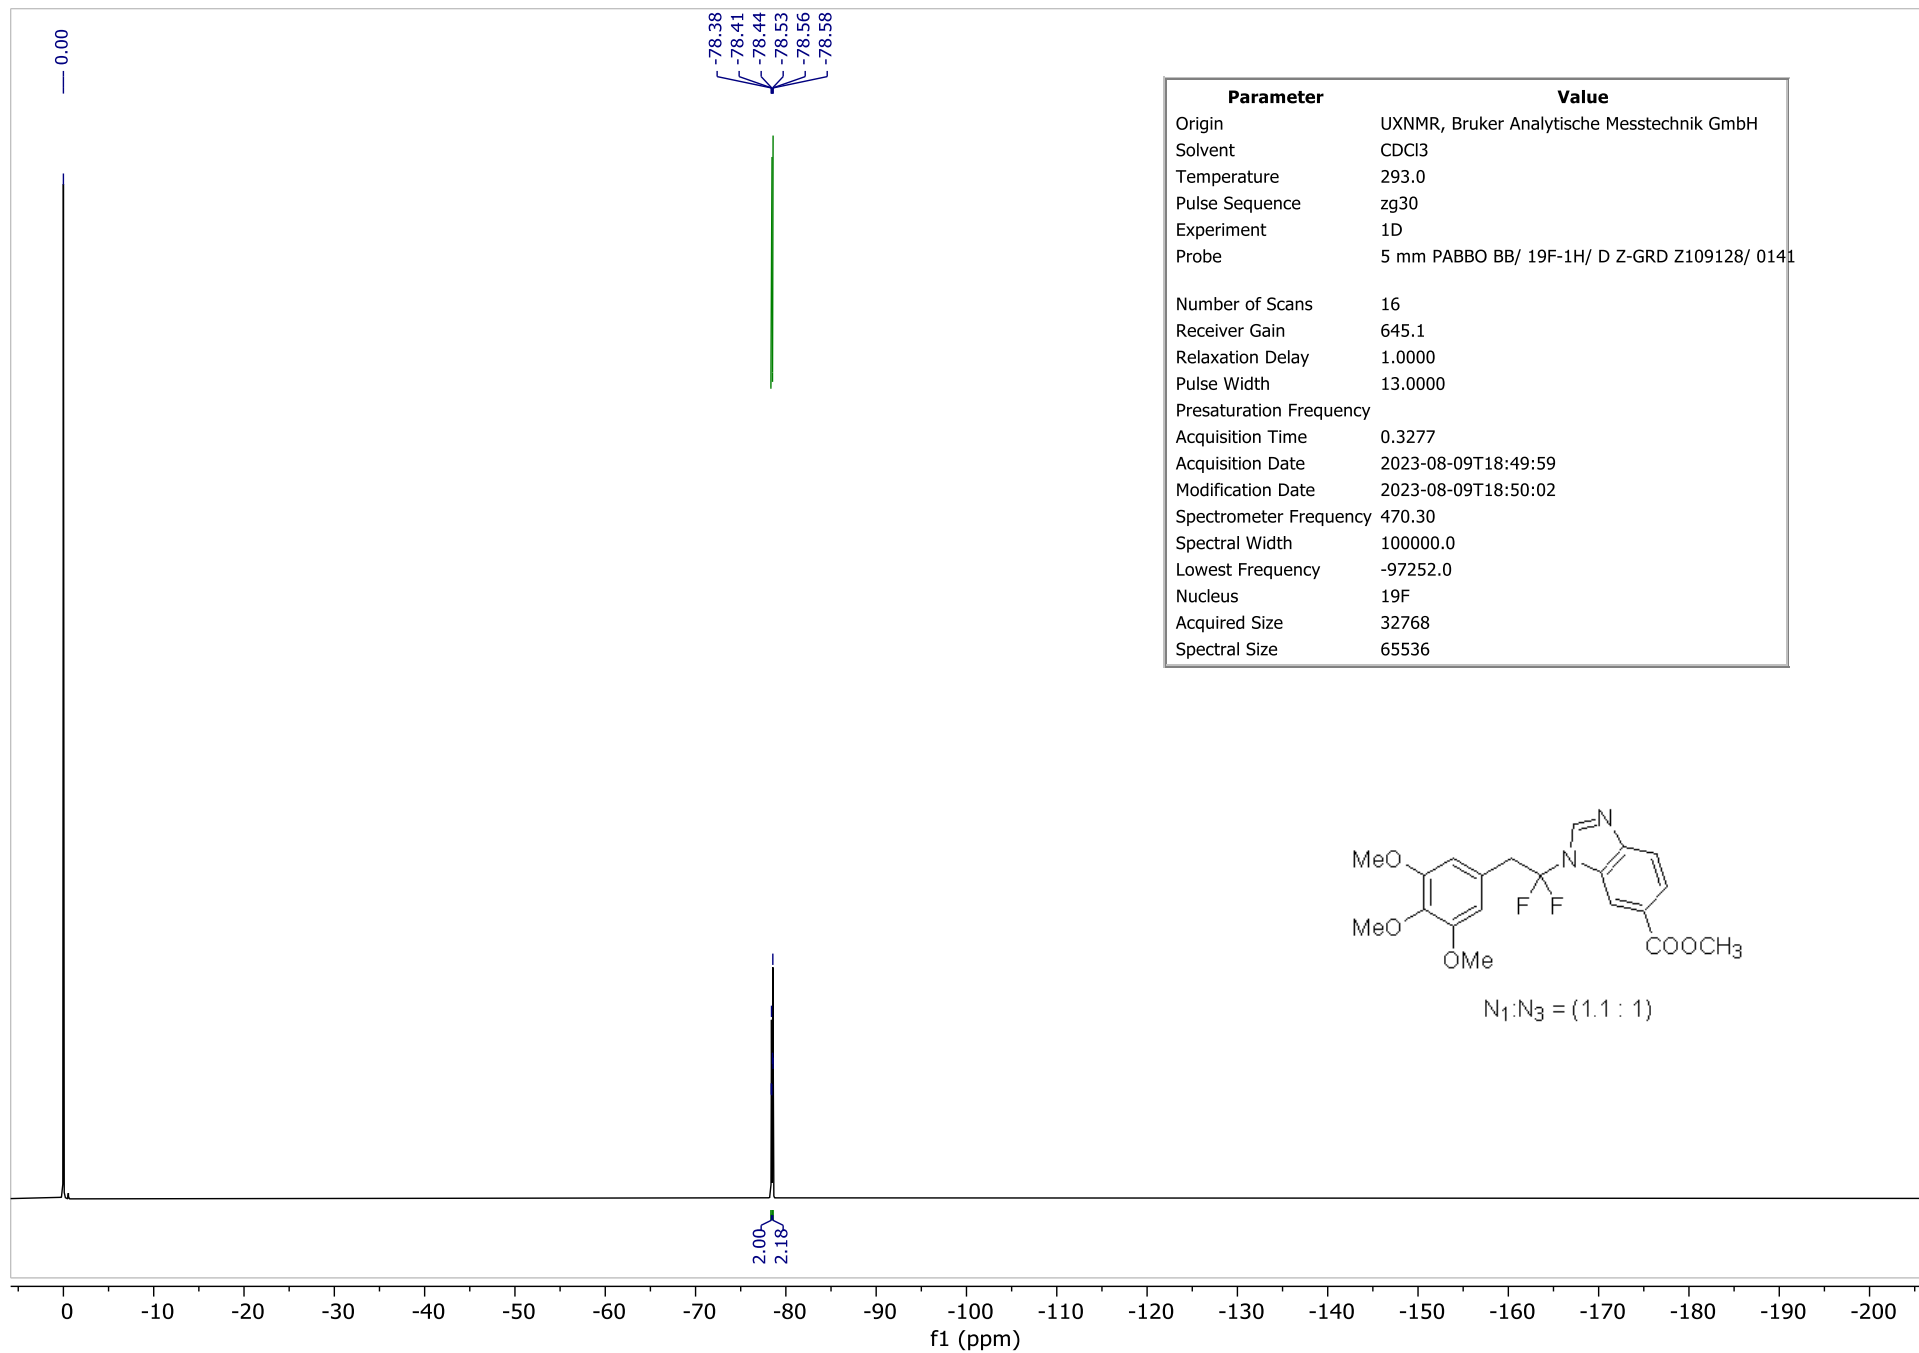

# NMR spectra for 2-(1,1-difluoro-2-(3,4,5-trimethoxyphenyl)ethyl)-2*H*-indazole (**11af**)

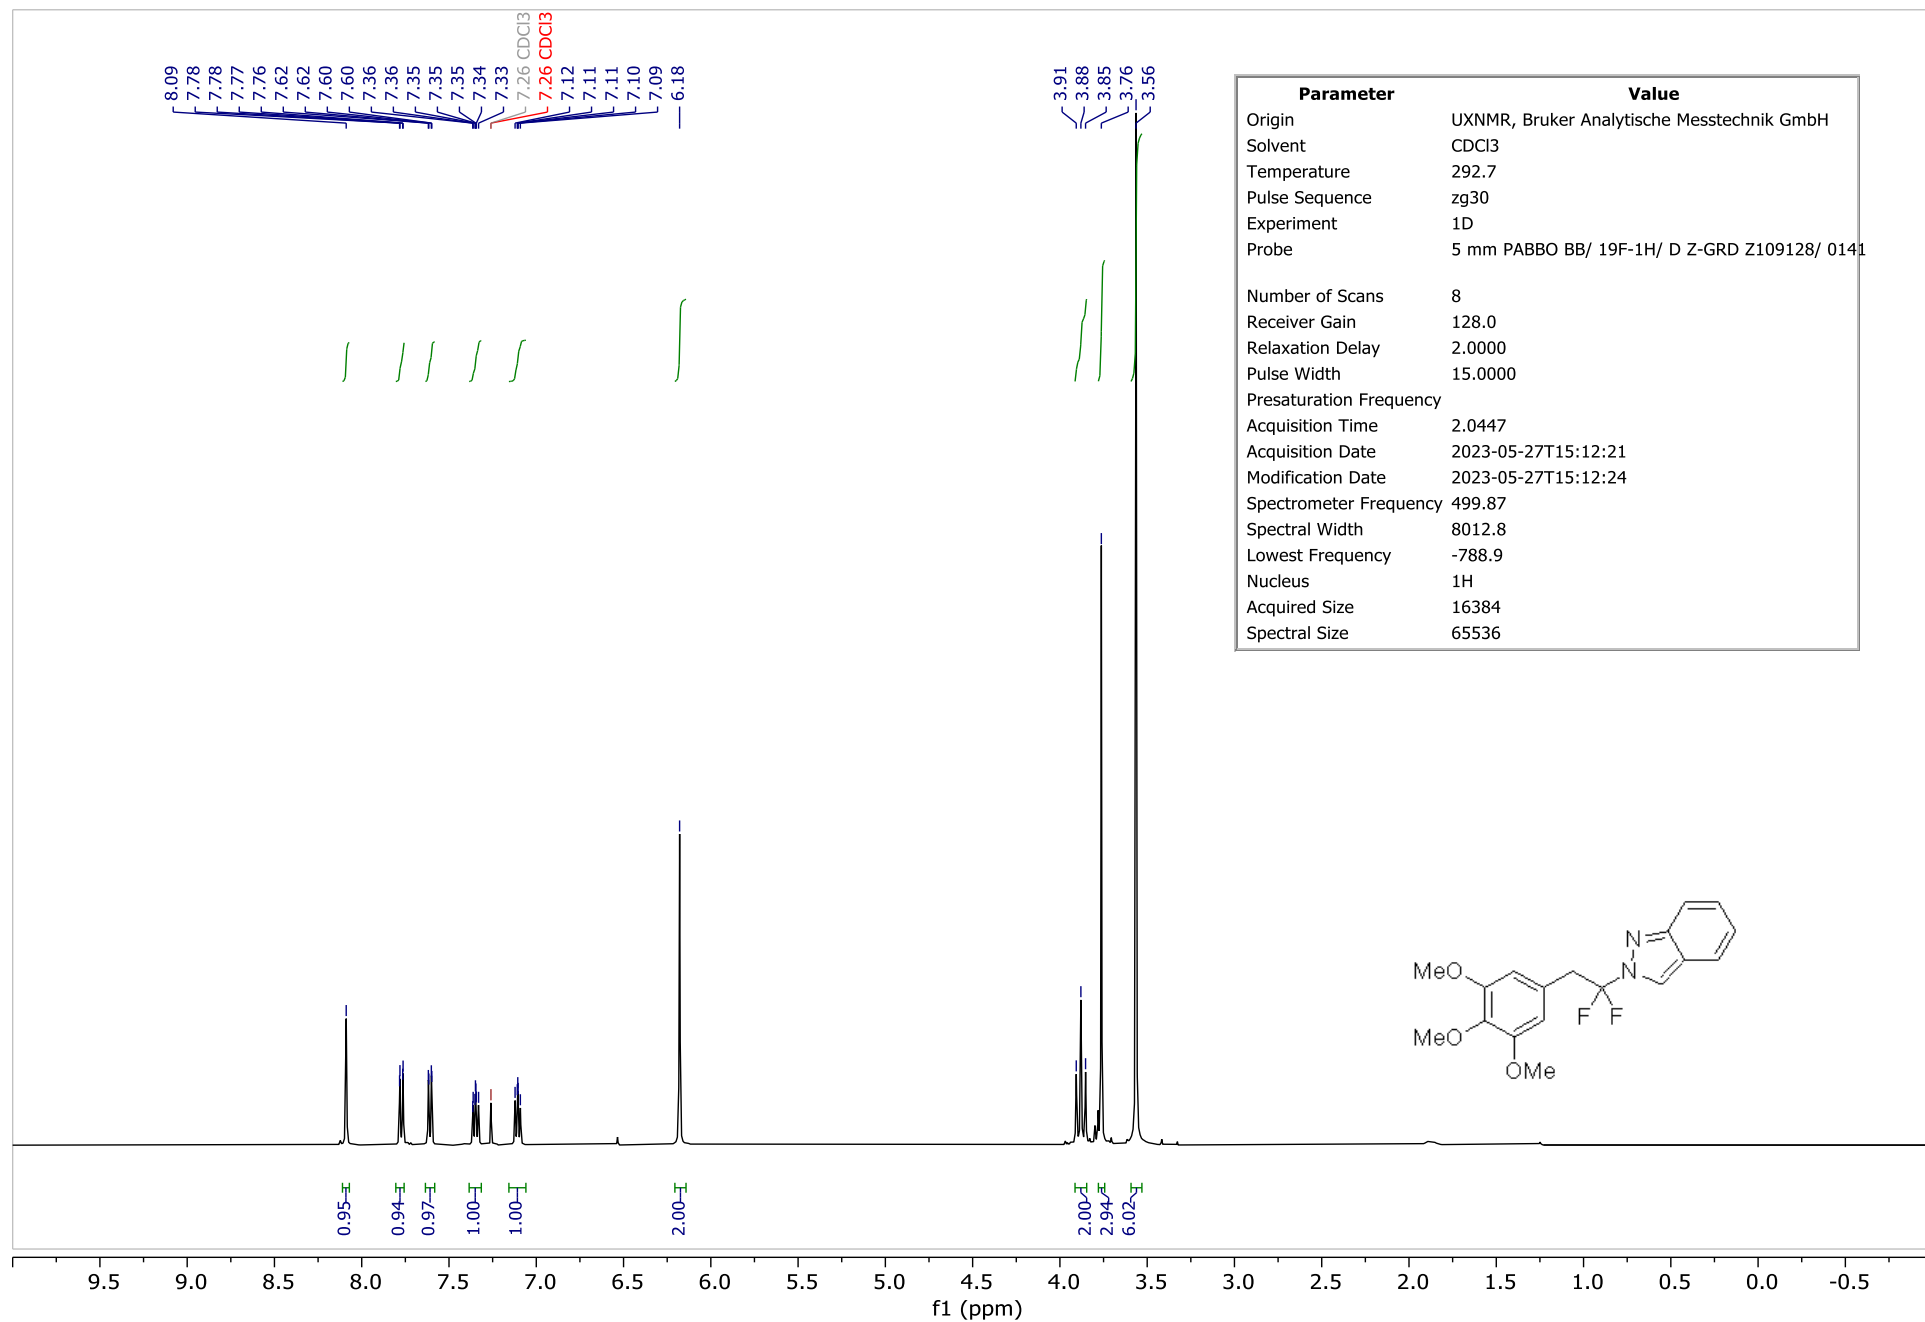



| Parameter               | Value                                        |
|-------------------------|----------------------------------------------|
| Origin                  | UXNMR, Bruker Analytische Messtechnik GmbH   |
| Solvent                 | CDCl <sub>3</sub>                            |
| Temperature             | 293.1                                        |
| Pulse Sequence          | zgpg30                                       |
| Experiment              | 1D                                           |
| Probe                   | 5 mm PABBO BB/ 19F-1H/ D Z-GRD Z109128/ 0141 |
| Number of Scans         | 675                                          |
| Receiver Gain           | 16384.0                                      |
| Relaxation Delay        | 0.1500                                       |
| Pulse Width             | 12.0000                                      |
| Presaturation Frequency |                                              |
| Acquisition Time        | 0.5456                                       |
| Acquisition Date        | 2023-04-05T17:14:15                          |
| Modification Date       | 2023-04-05T17:14:18                          |
| Spectrometer Frequency  | 125.71                                       |
| Spectral Width          | 30030.0                                      |
| Lowest Frequency        | -1270.0                                      |
| Nucleus                 | 13C                                          |
| Acquired Size           | 16384                                        |
| Spectral Size           | 65536                                        |

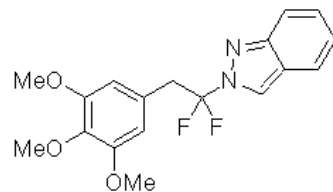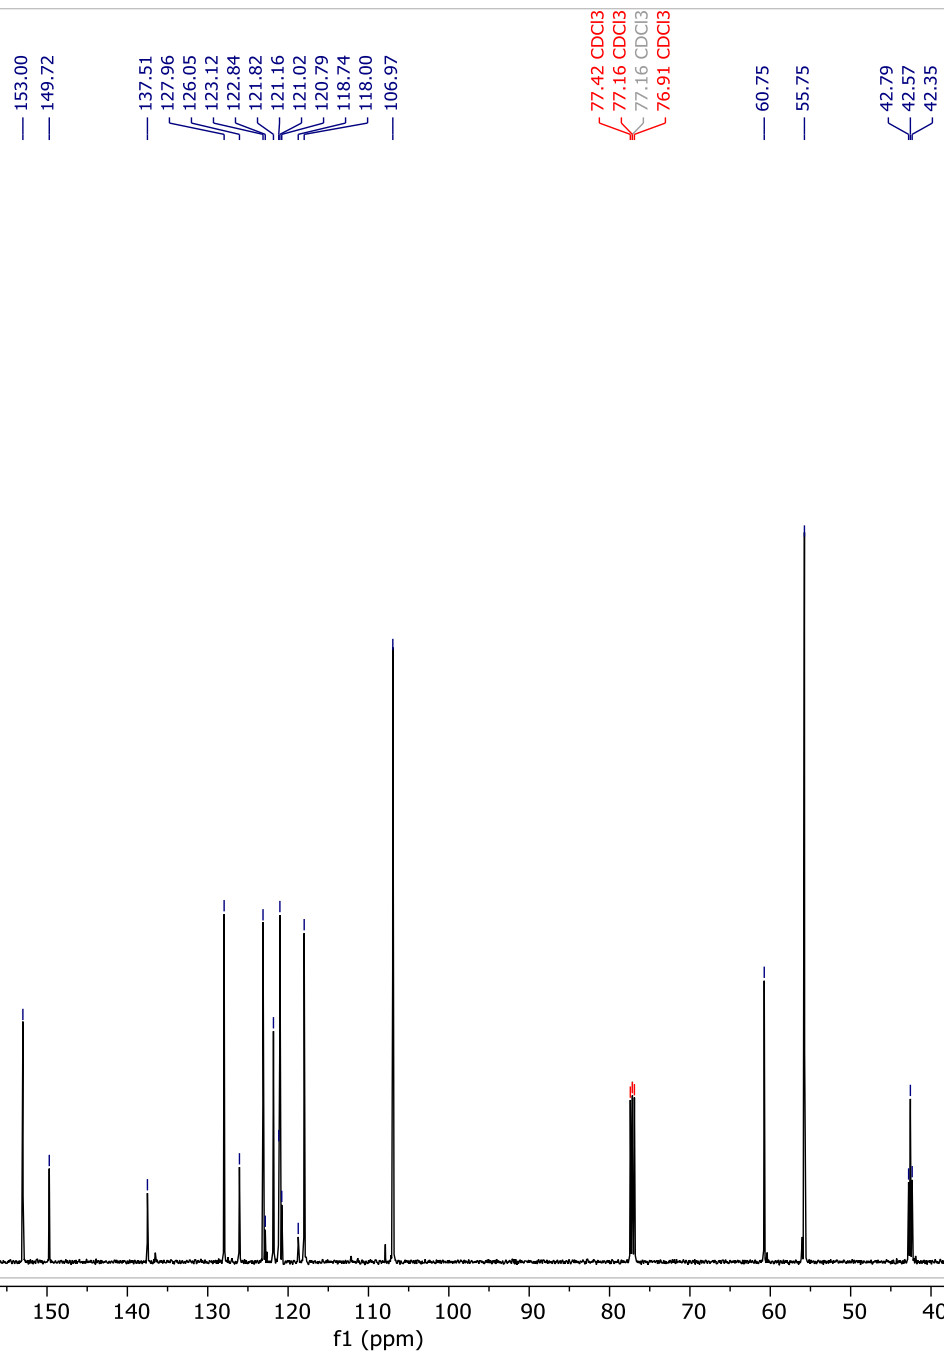

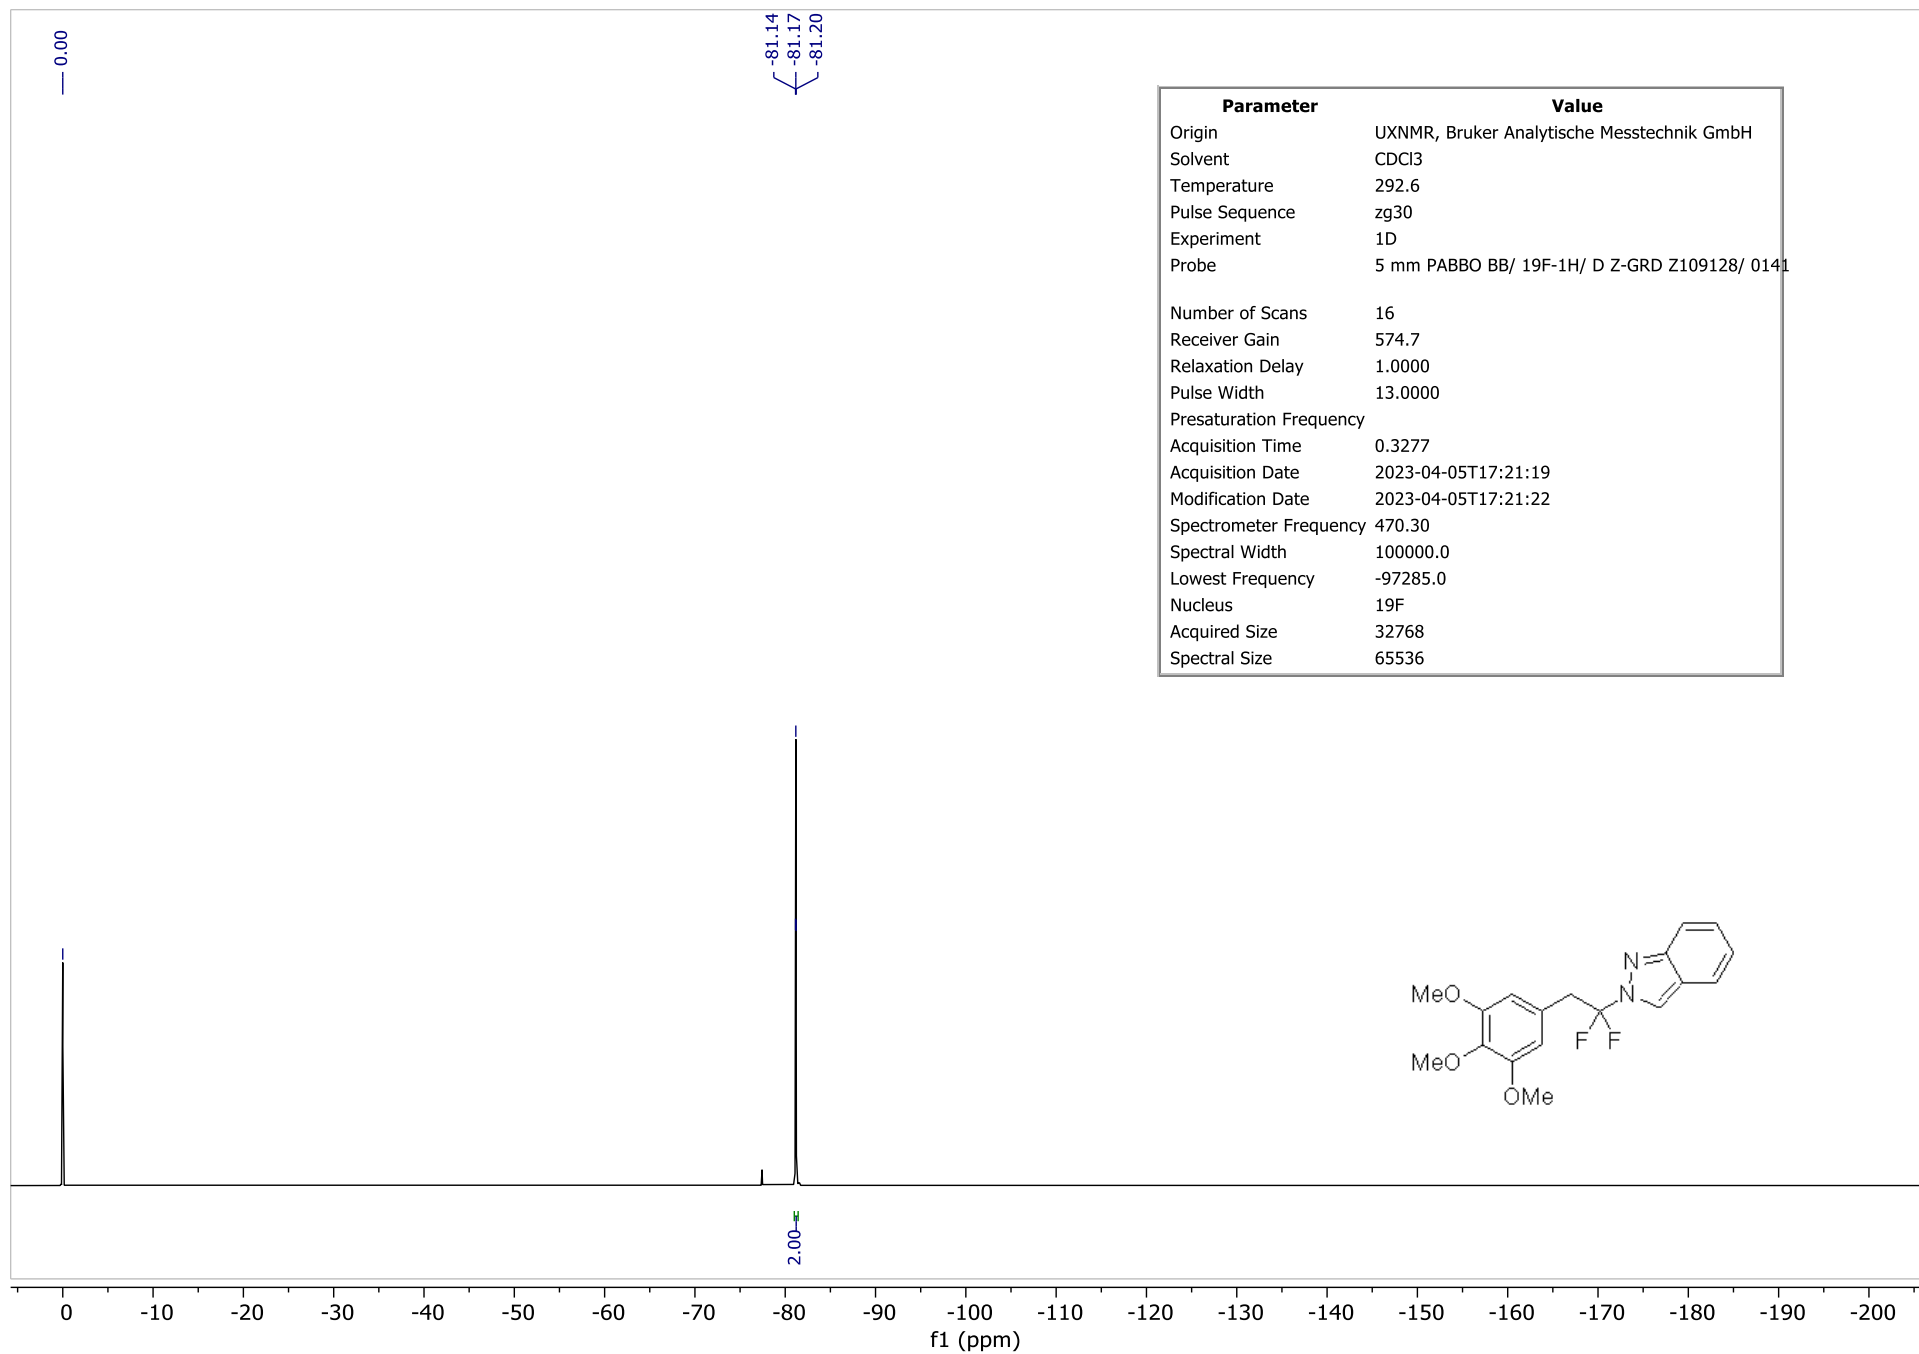

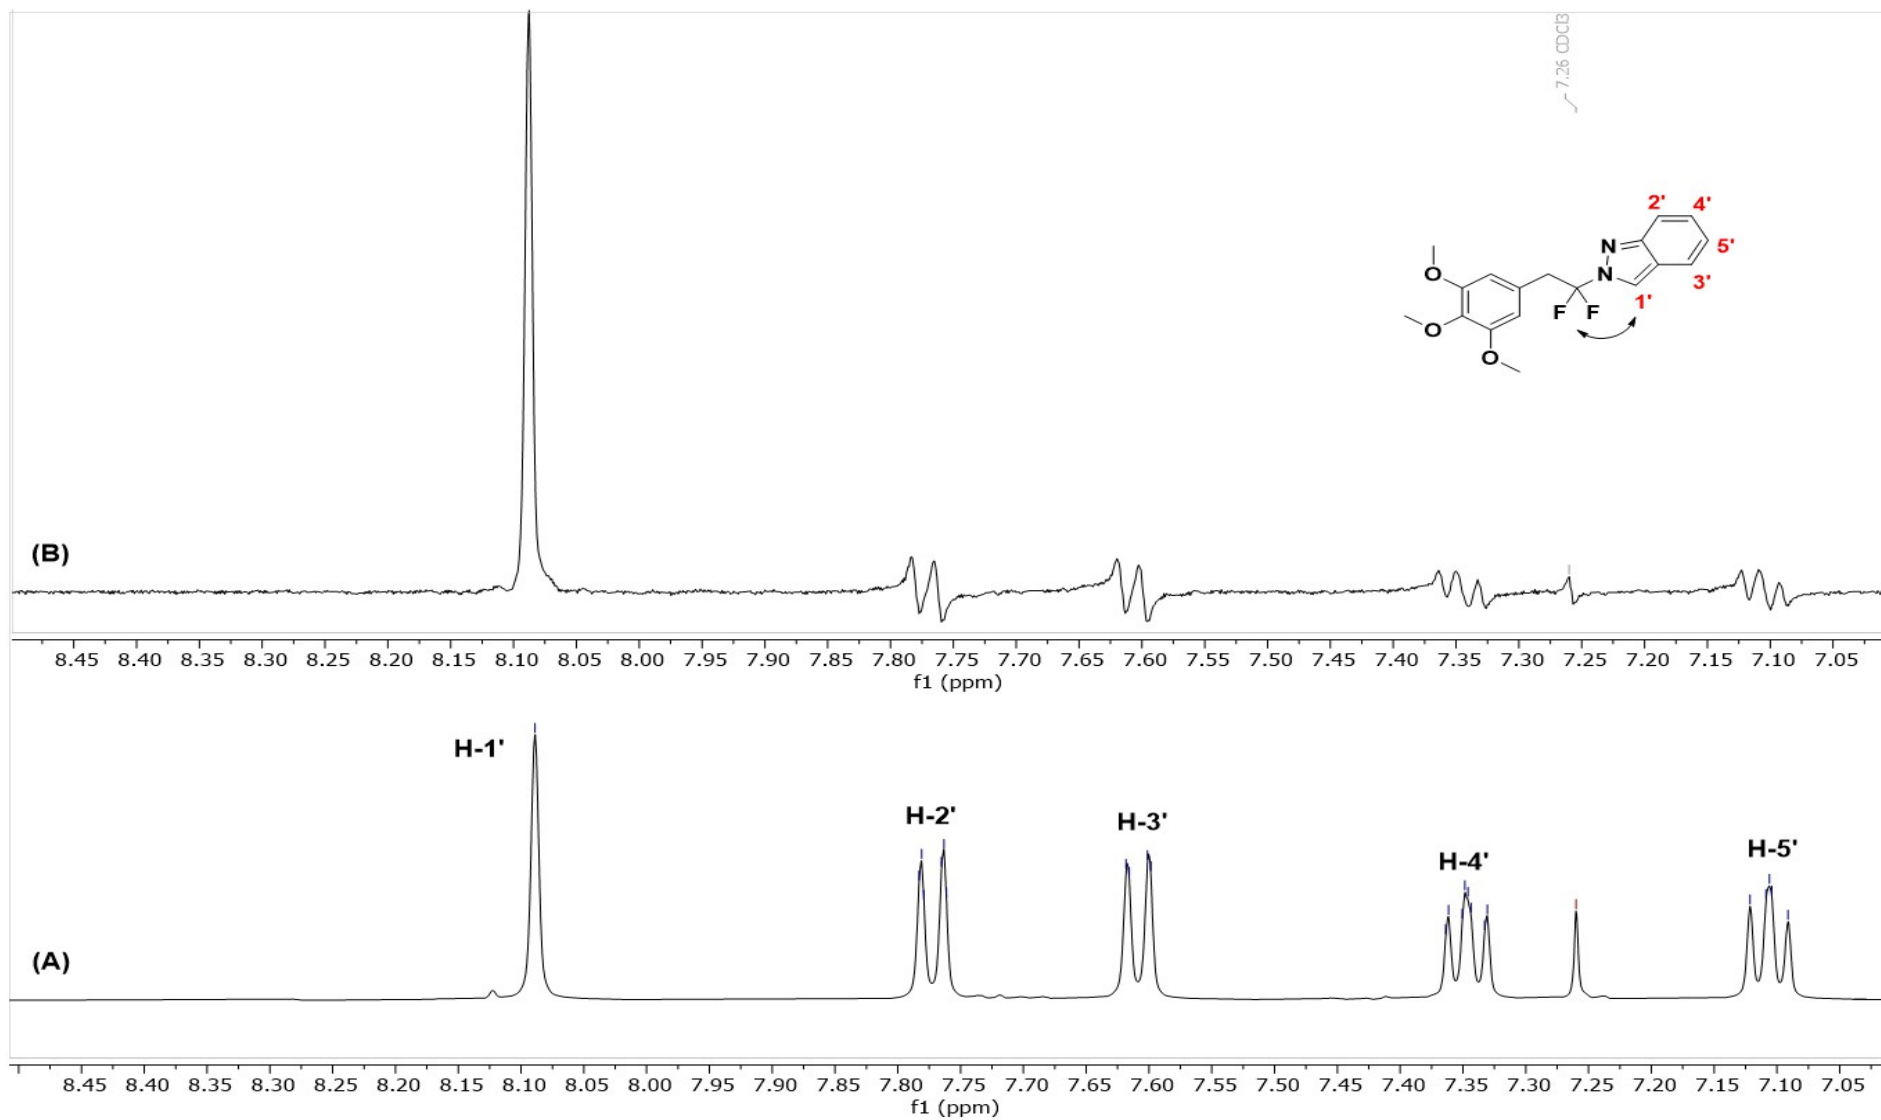

(A) Aromatic region of  $^1\text{H}$  NMR spectrum of **11af**. (B)  $^1\text{H}$   $\{^{19}\text{F}\}$  NOE difference spectrum after preirradiation of  $^{19}\text{F}$   $\delta$  -81.17.

NMR spectra for 2-(1,1-difluoro-2-(3,4,5-trimethoxyphenyl)ethyl)-5-(trifluoromethyl)-2H-indazole (**11ag**)

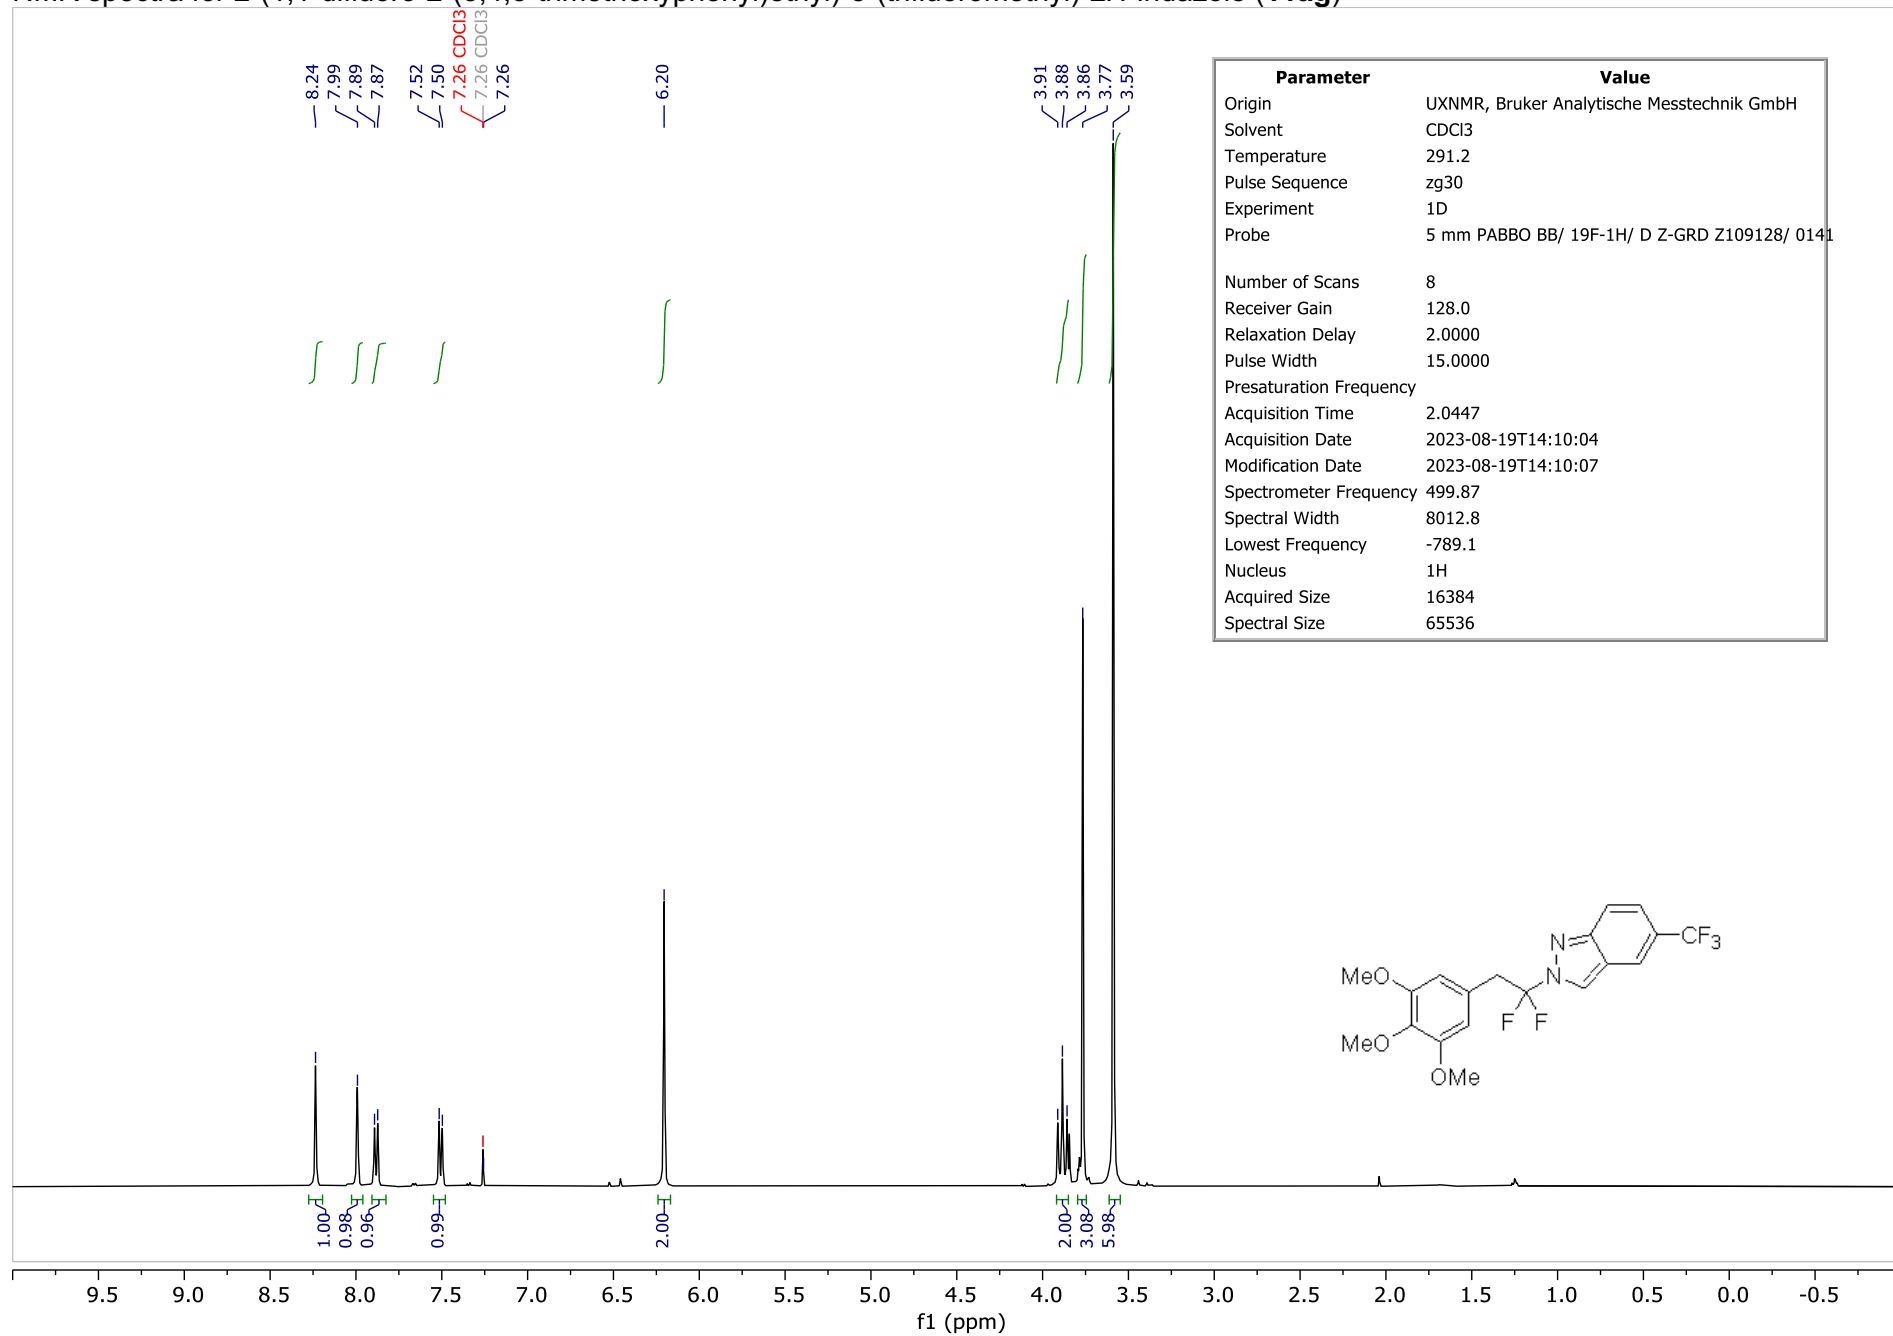

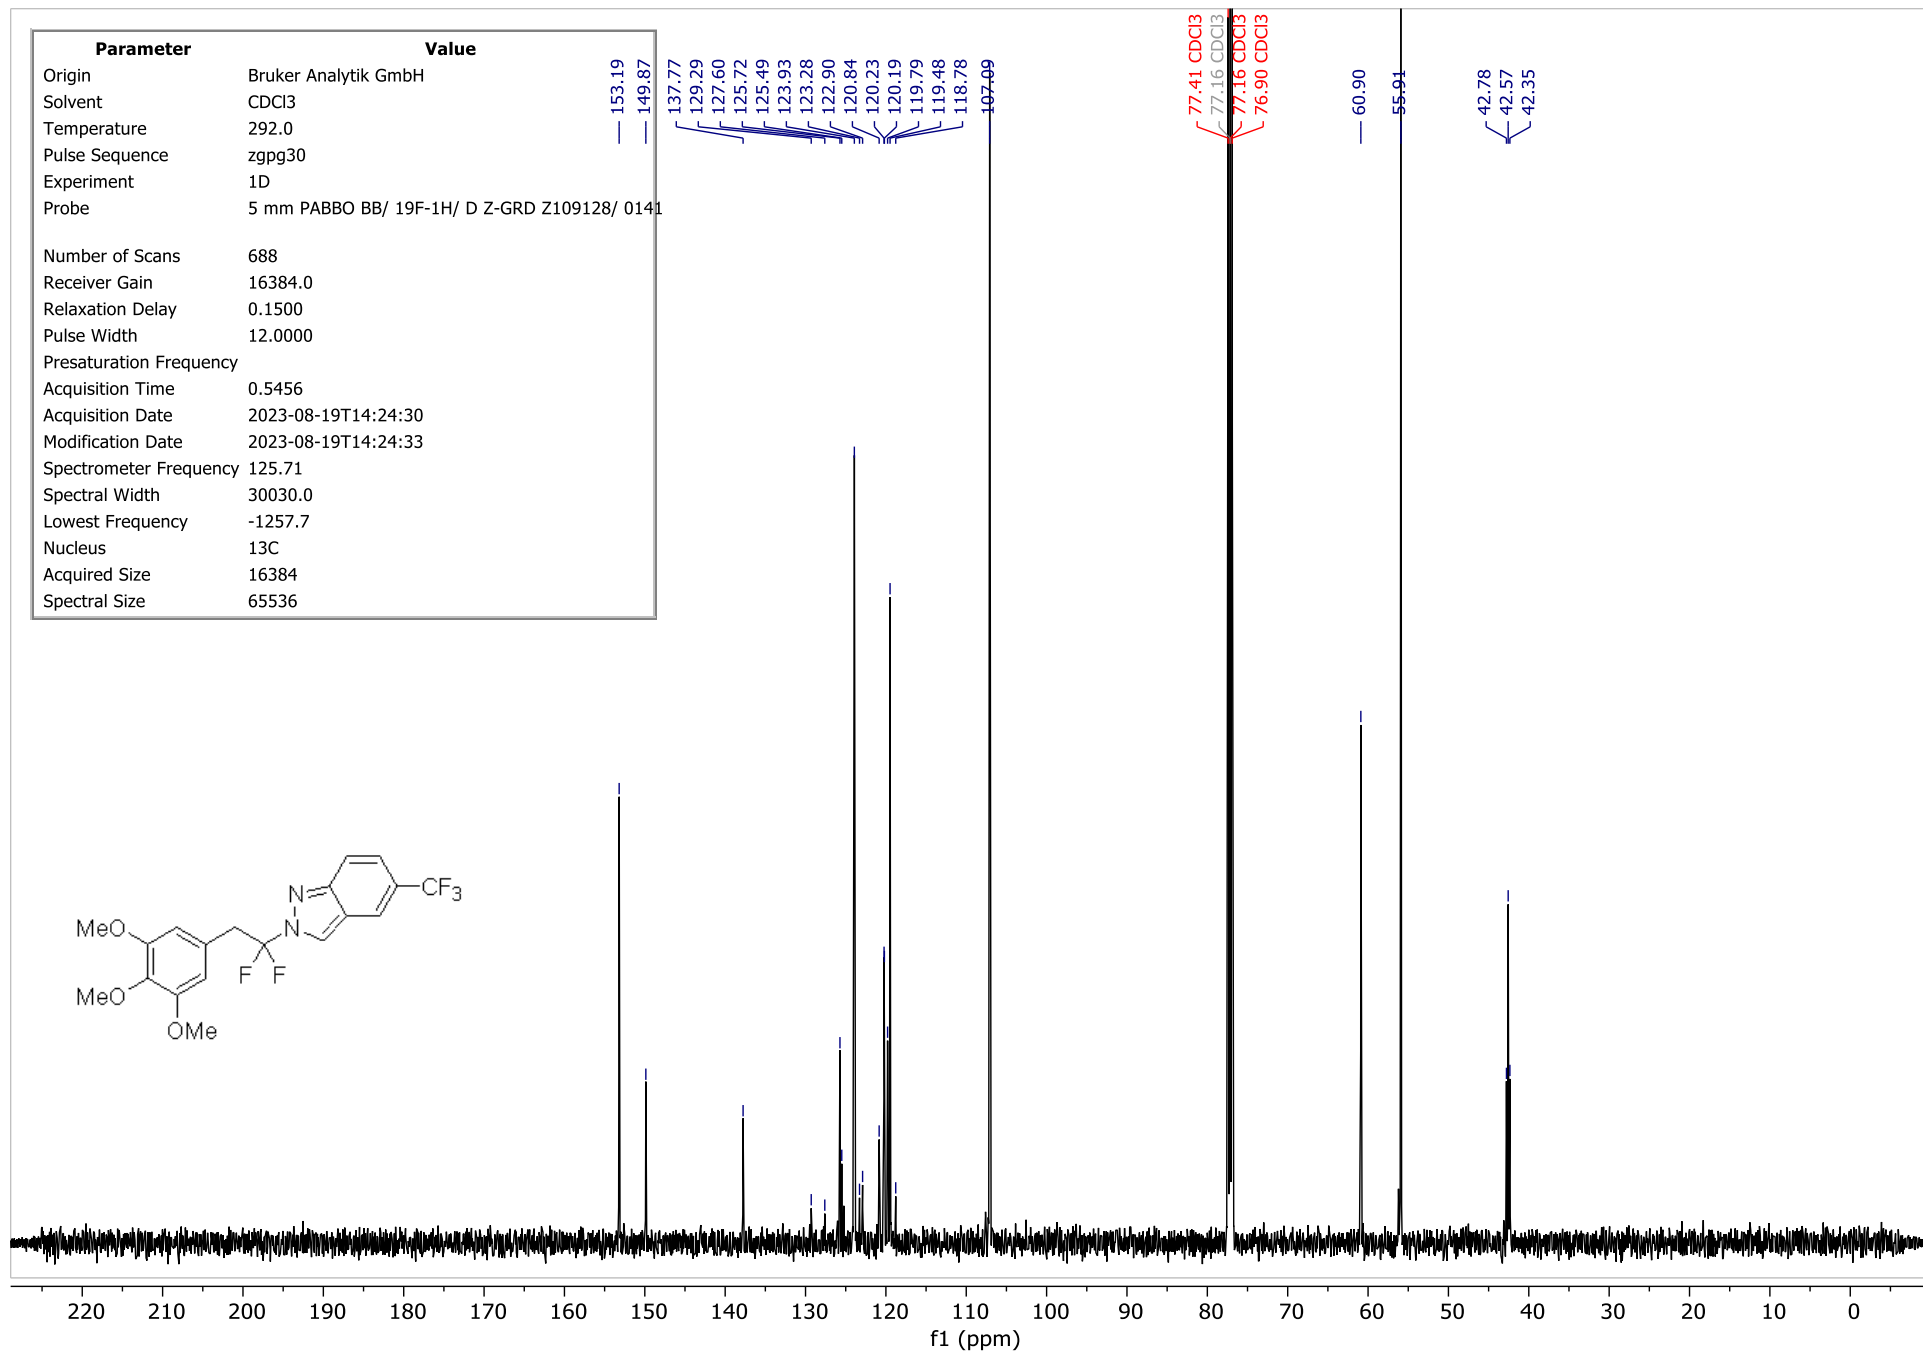

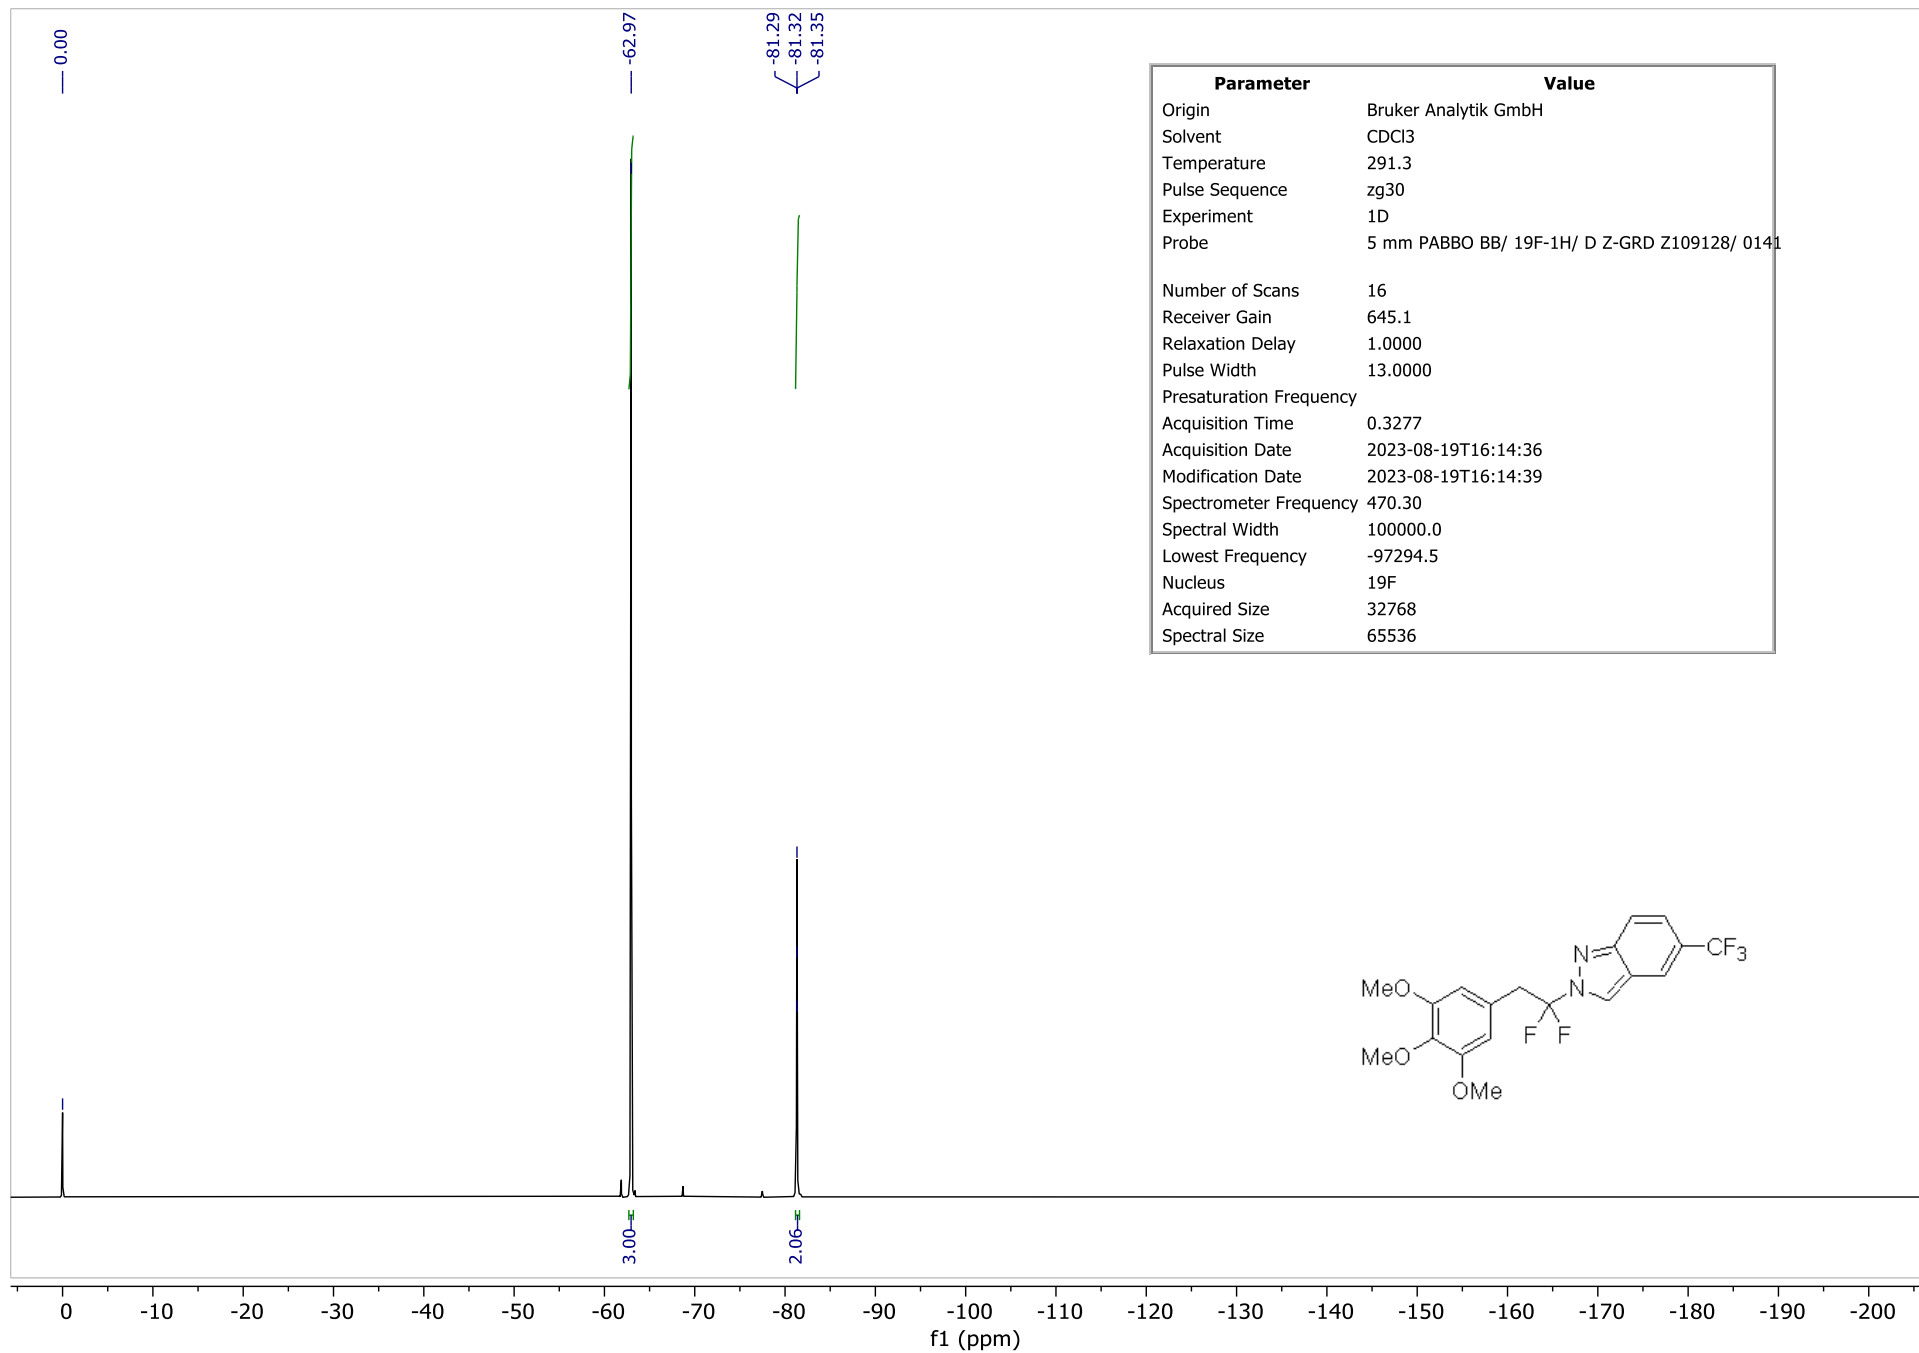

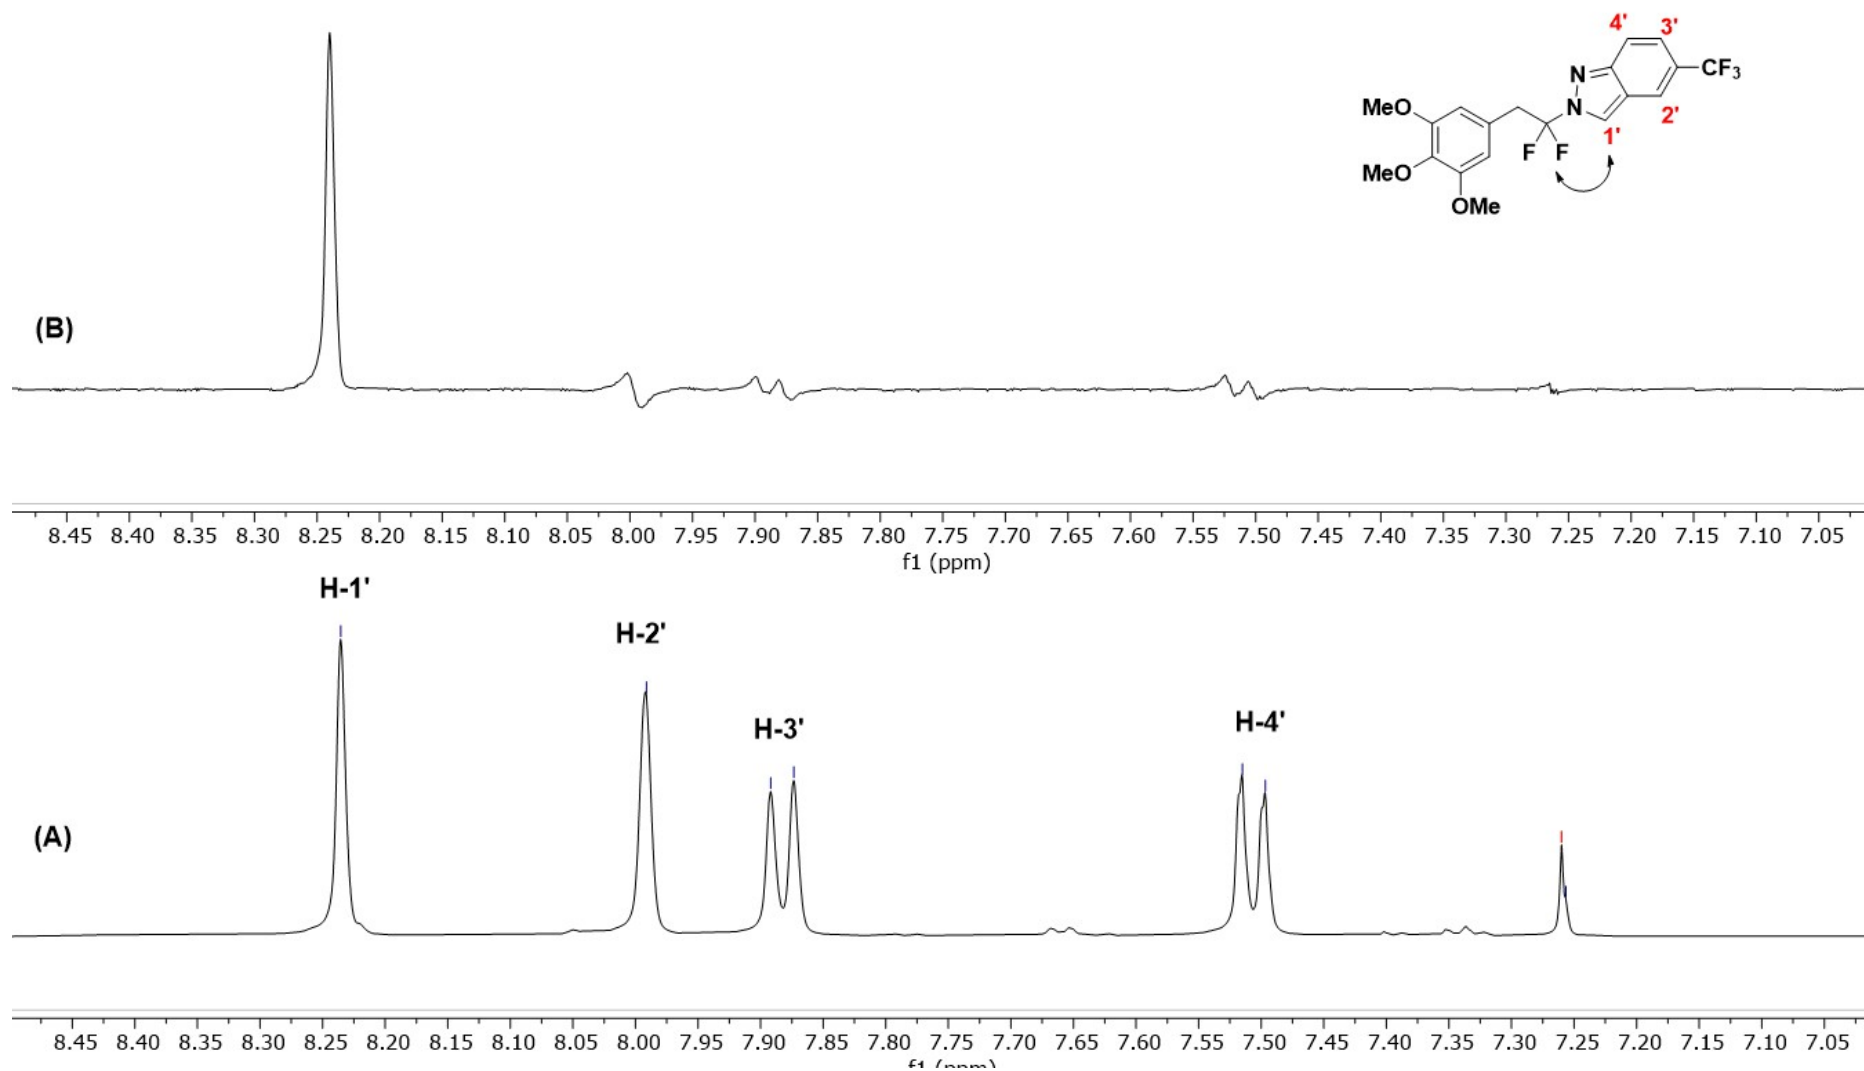

(A) Aromatic region of  $^1\text{H}$  NMR spectrum of **11ag**. (B)  $^1\text{H}$   $\{^{19}\text{F}\}$  NOE difference spectrum after preirradiation of  $^{19}\text{F}$   $\delta$  -81.32.

NMR spectra for 1-(1,1-difluoro-2-(3,4,5-trimethoxyphenyl)ethyl)-1*H*-benzo[*d*][1,2,3]triazole (**11ah**)

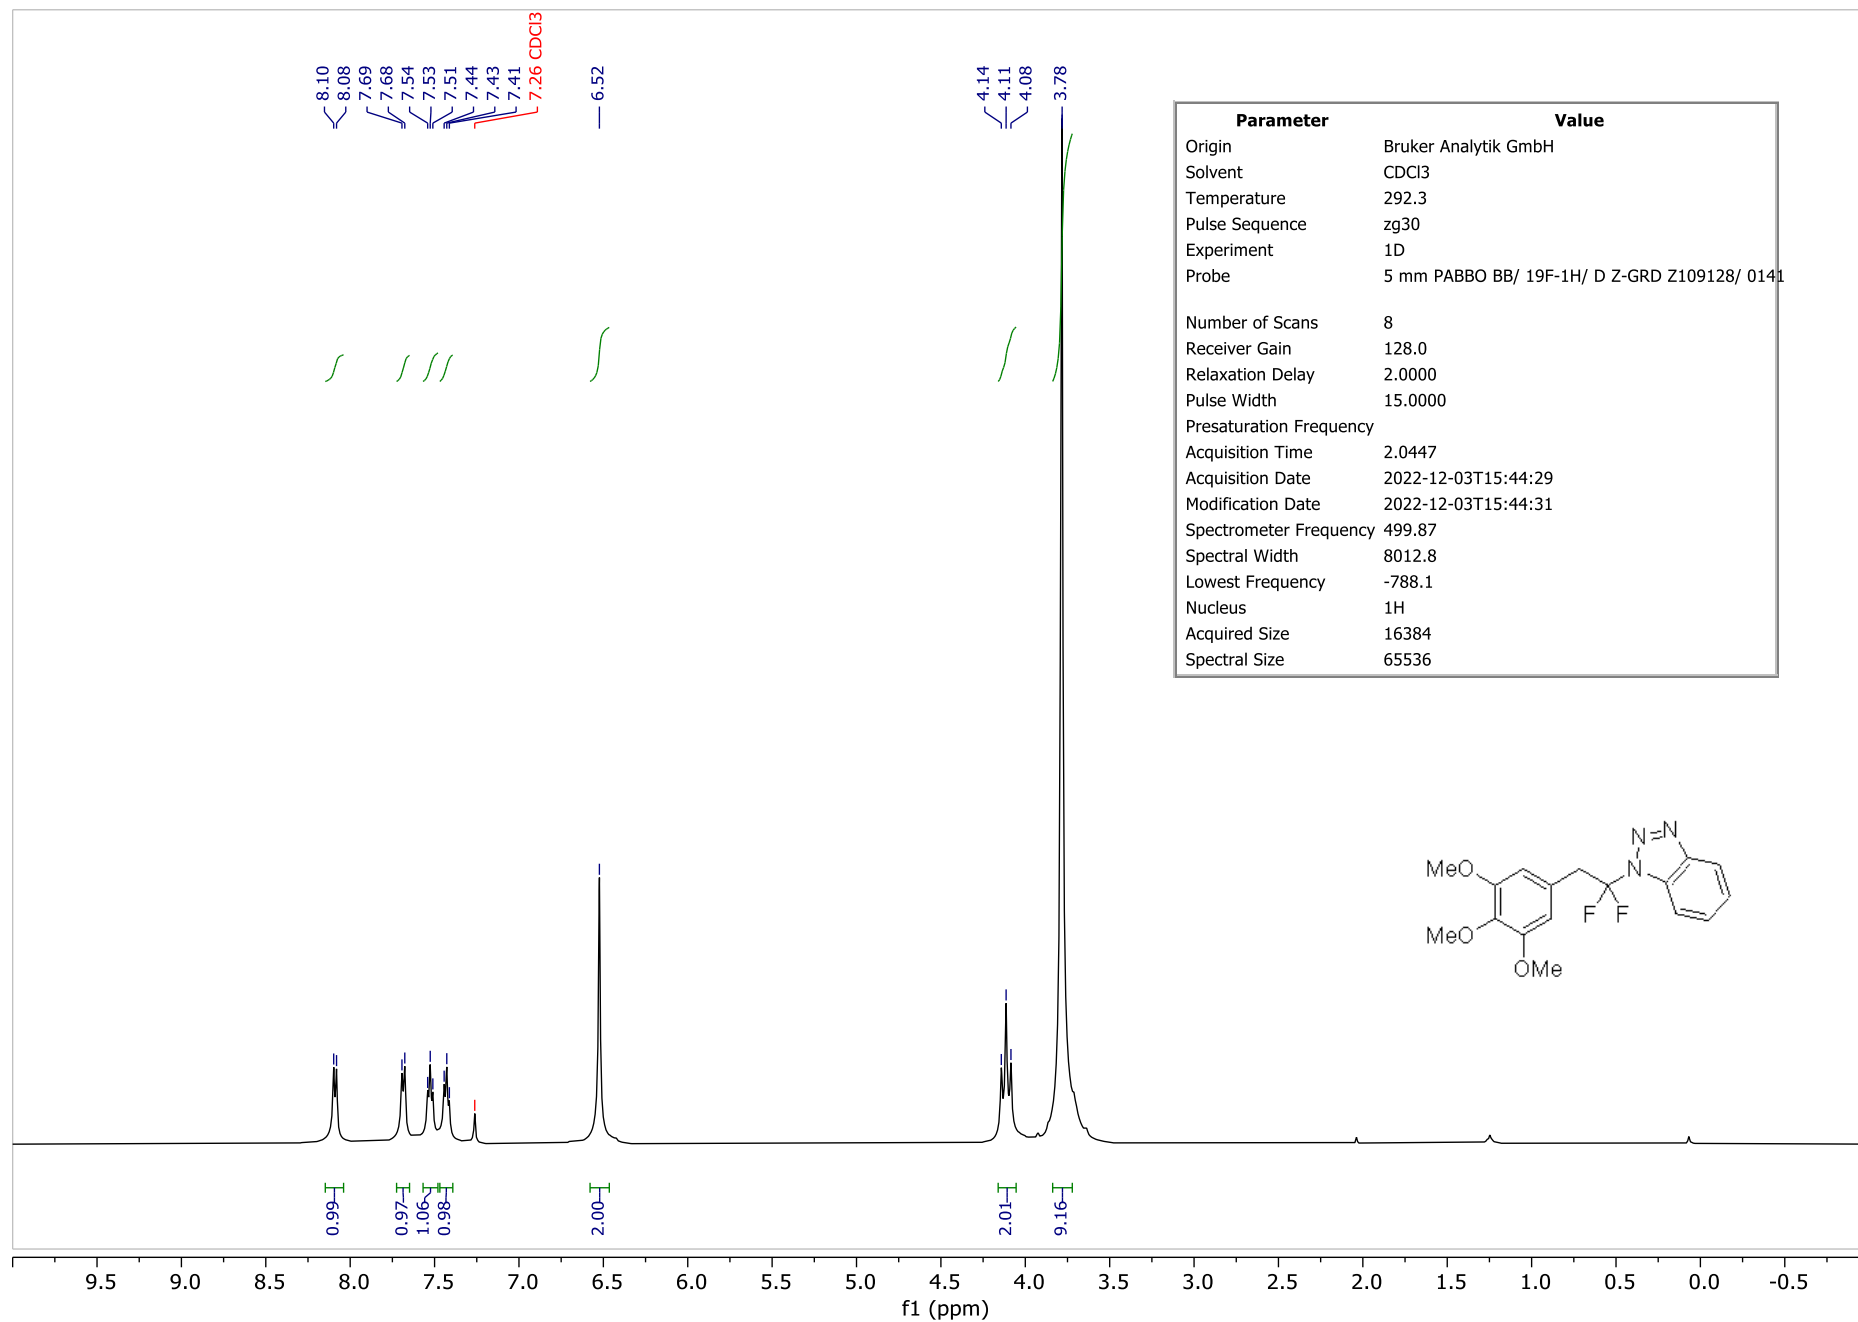



| Parameter               | Value                                       |
|-------------------------|---------------------------------------------|
| Origin                  | Bruker BioSpin GmbH                         |
| Solvent                 | CDCl3                                       |
| Temperature             | 298.0                                       |
| Pulse Sequence          | zgpg30                                      |
| Experiment              | 1D                                          |
| Probe                   | Z109128_0156 (PA BBO 500S2<br>BBF-H-D-05 Z) |
| Number of Scans         | 2000                                        |
| Receiver Gain           | 101.0                                       |
| Relaxation Delay        | 0.1000                                      |
| Pulse Width             | 10.0000                                     |
| Presaturation Frequency |                                             |
| Acquisition Time        | 0.5439                                      |
| Acquisition Date        | 2024-04-26T12:26:48                         |
| Modification Date       | 2024-04-26T12:26:49                         |
| Spectrometer Frequency  | 125.71                                      |
| Spectral Width          | 30120.5                                     |
| Lowest Frequency        | -1245.2                                     |
| Nucleus                 | <sup>13</sup> C                             |
| Acquired Size           | 16384                                       |
| Spectral Size           | 65536                                       |

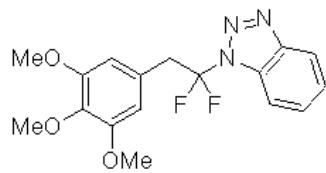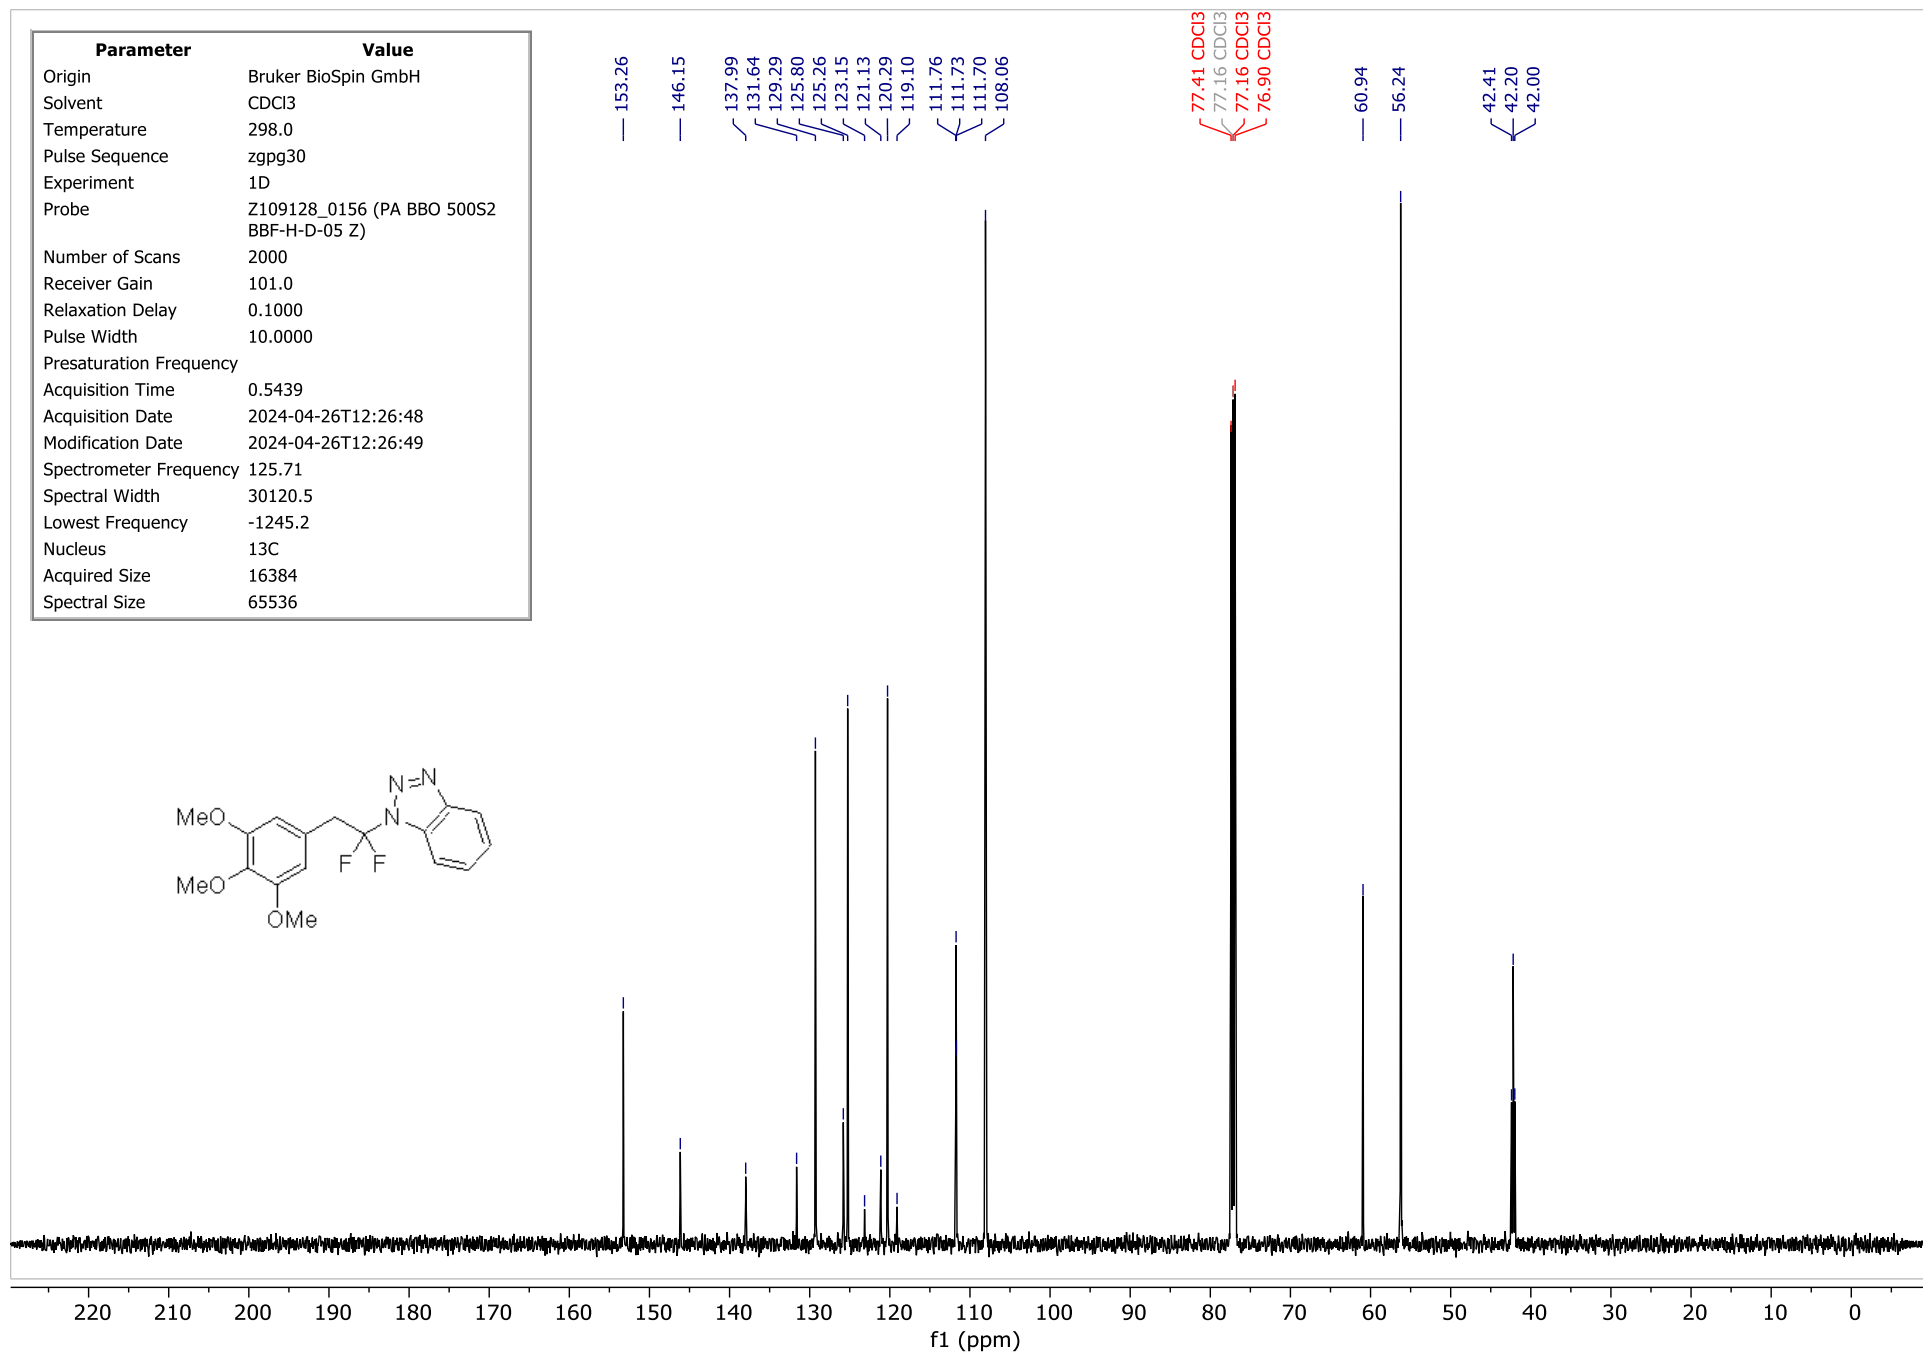

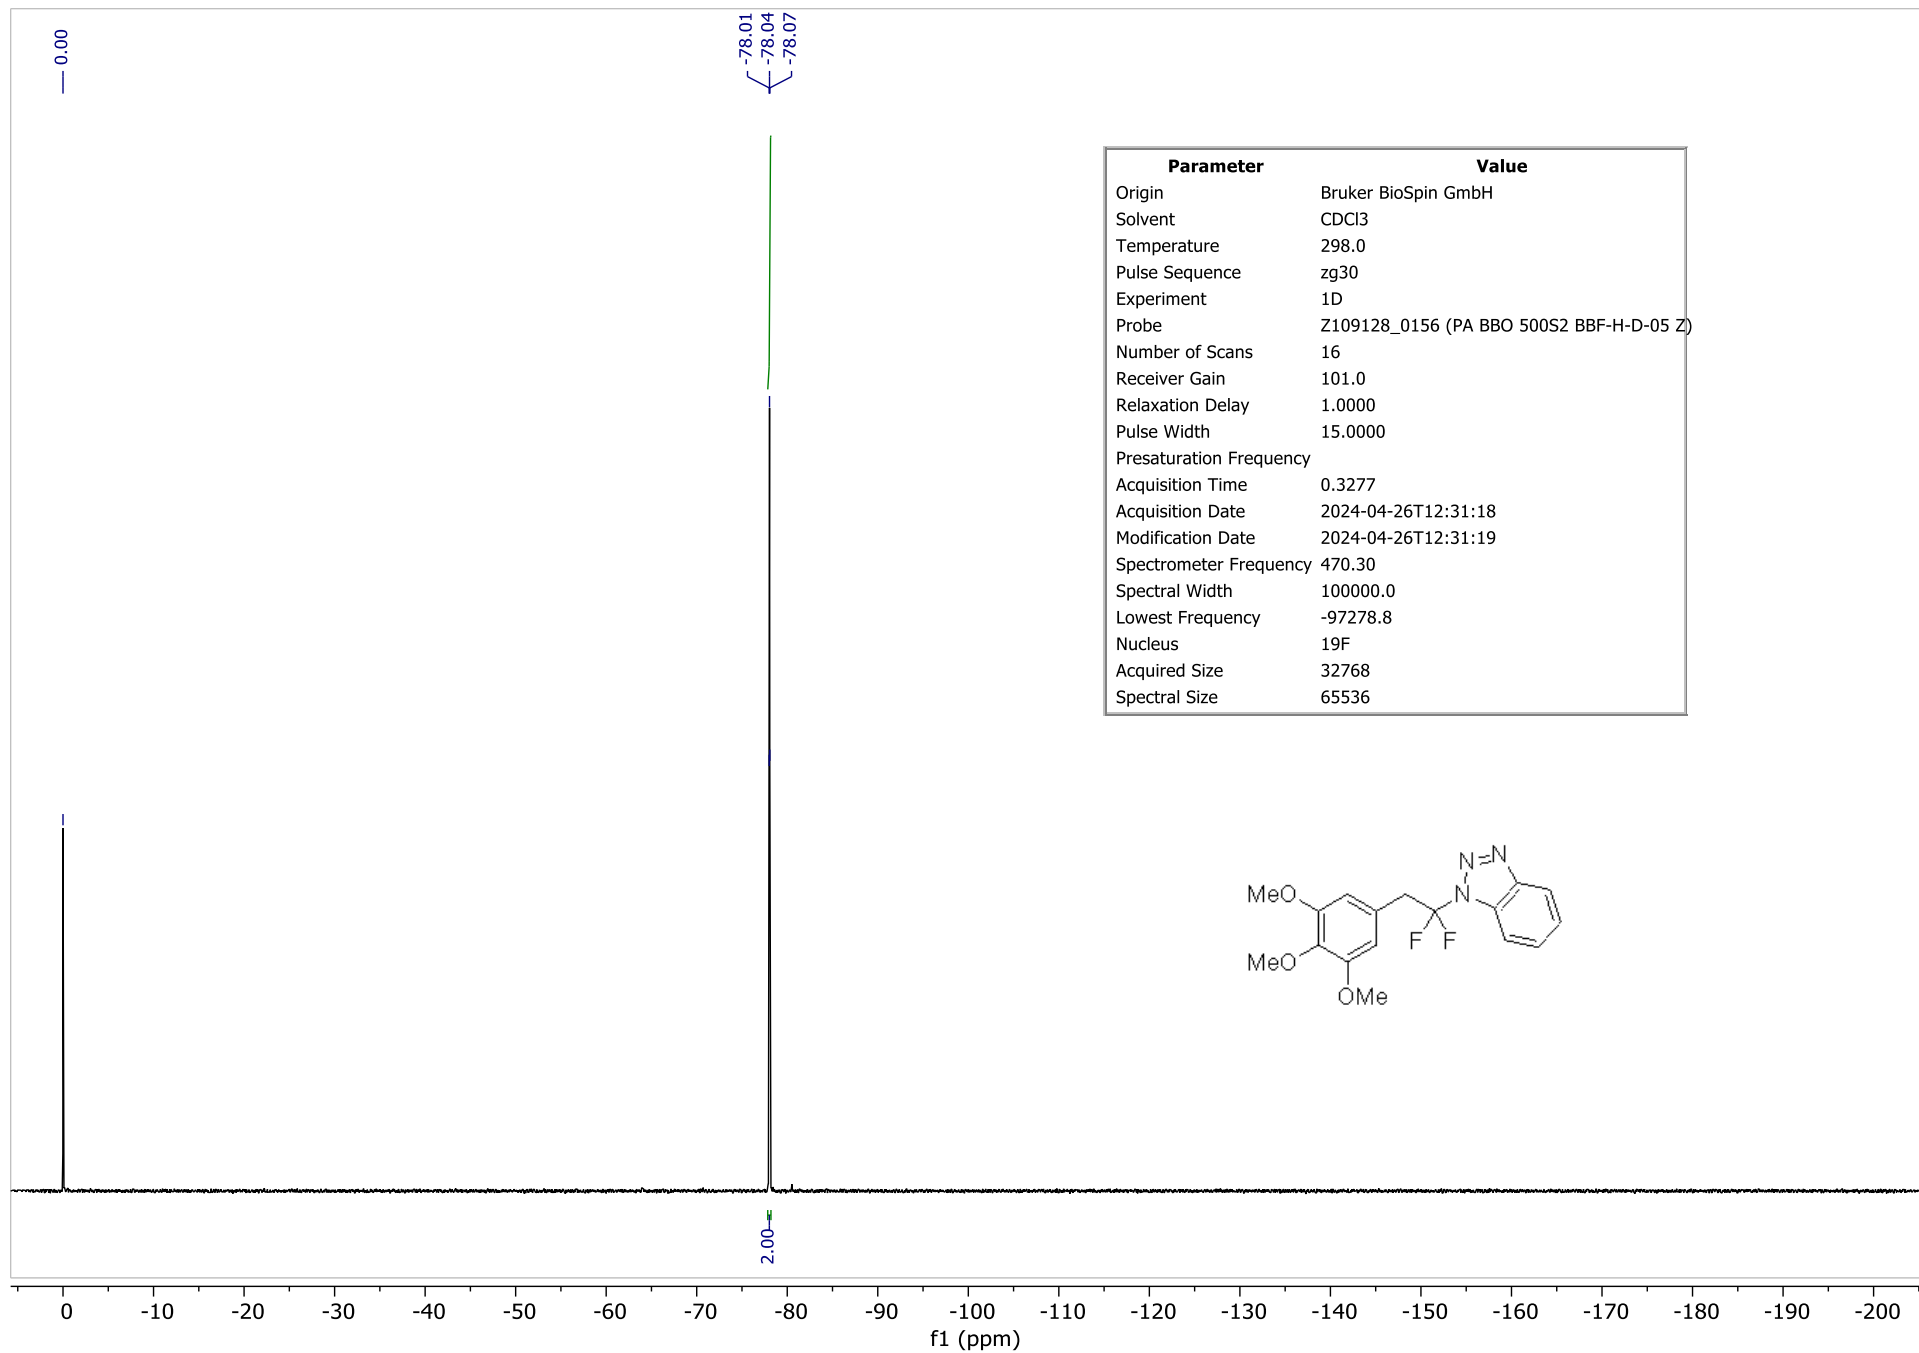

| Parameter               | Value                                    |
|-------------------------|------------------------------------------|
| Origin                  | Bruker BioSpin GmbH                      |
| Solvent                 | CDCl3                                    |
| Temperature             | 298.0                                    |
| Pulse Sequence          | zg30                                     |
| Experiment              | 1D                                       |
| Probe                   | Z109128_0156 (PA BBO 500S2 BBF-H-D-05 Z) |
| Number of Scans         | 16                                       |
| Receiver Gain           | 101.0                                    |
| Relaxation Delay        | 1.0000                                   |
| Pulse Width             | 15.0000                                  |
| Presaturation Frequency |                                          |
| Acquisition Time        | 0.3277                                   |
| Acquisition Date        | 2024-04-26T12:31:18                      |
| Modification Date       | 2024-04-26T12:31:19                      |
| Spectrometer Frequency  | 470.30                                   |
| Spectral Width          | 100000.0                                 |
| Lowest Frequency        | -97278.8                                 |
| Nucleus                 | 19F                                      |
| Acquired Size           | 32768                                    |
| Spectral Size           | 65536                                    |

NMR spectra for 7-(1,1-difluoro-2-(3,4,5-trimethoxyphenyl)ethyl)-1,3-dimethyl-3,7-dihydro-1*H*-purine-2,6-dione (**11ai**)

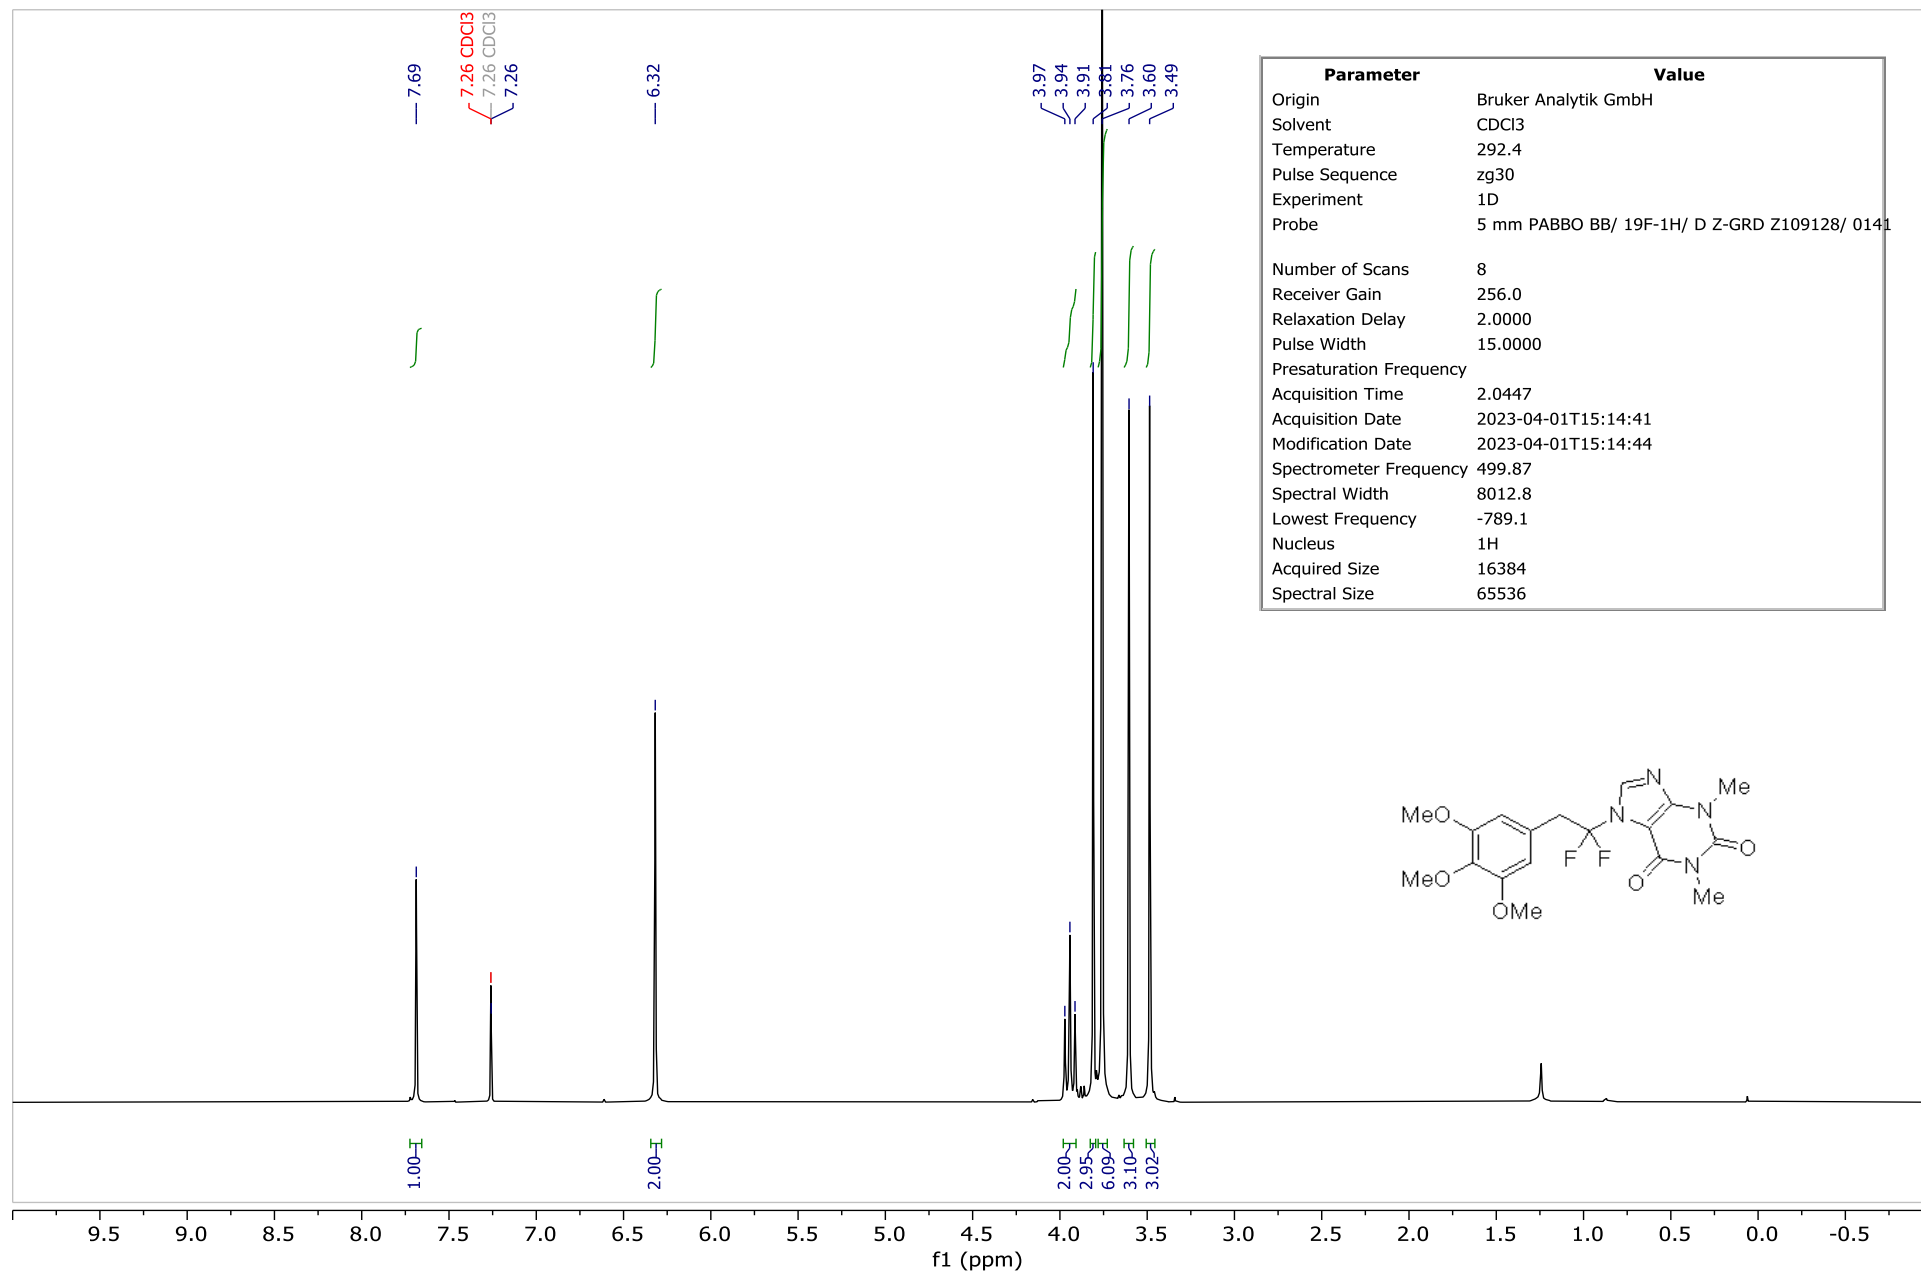

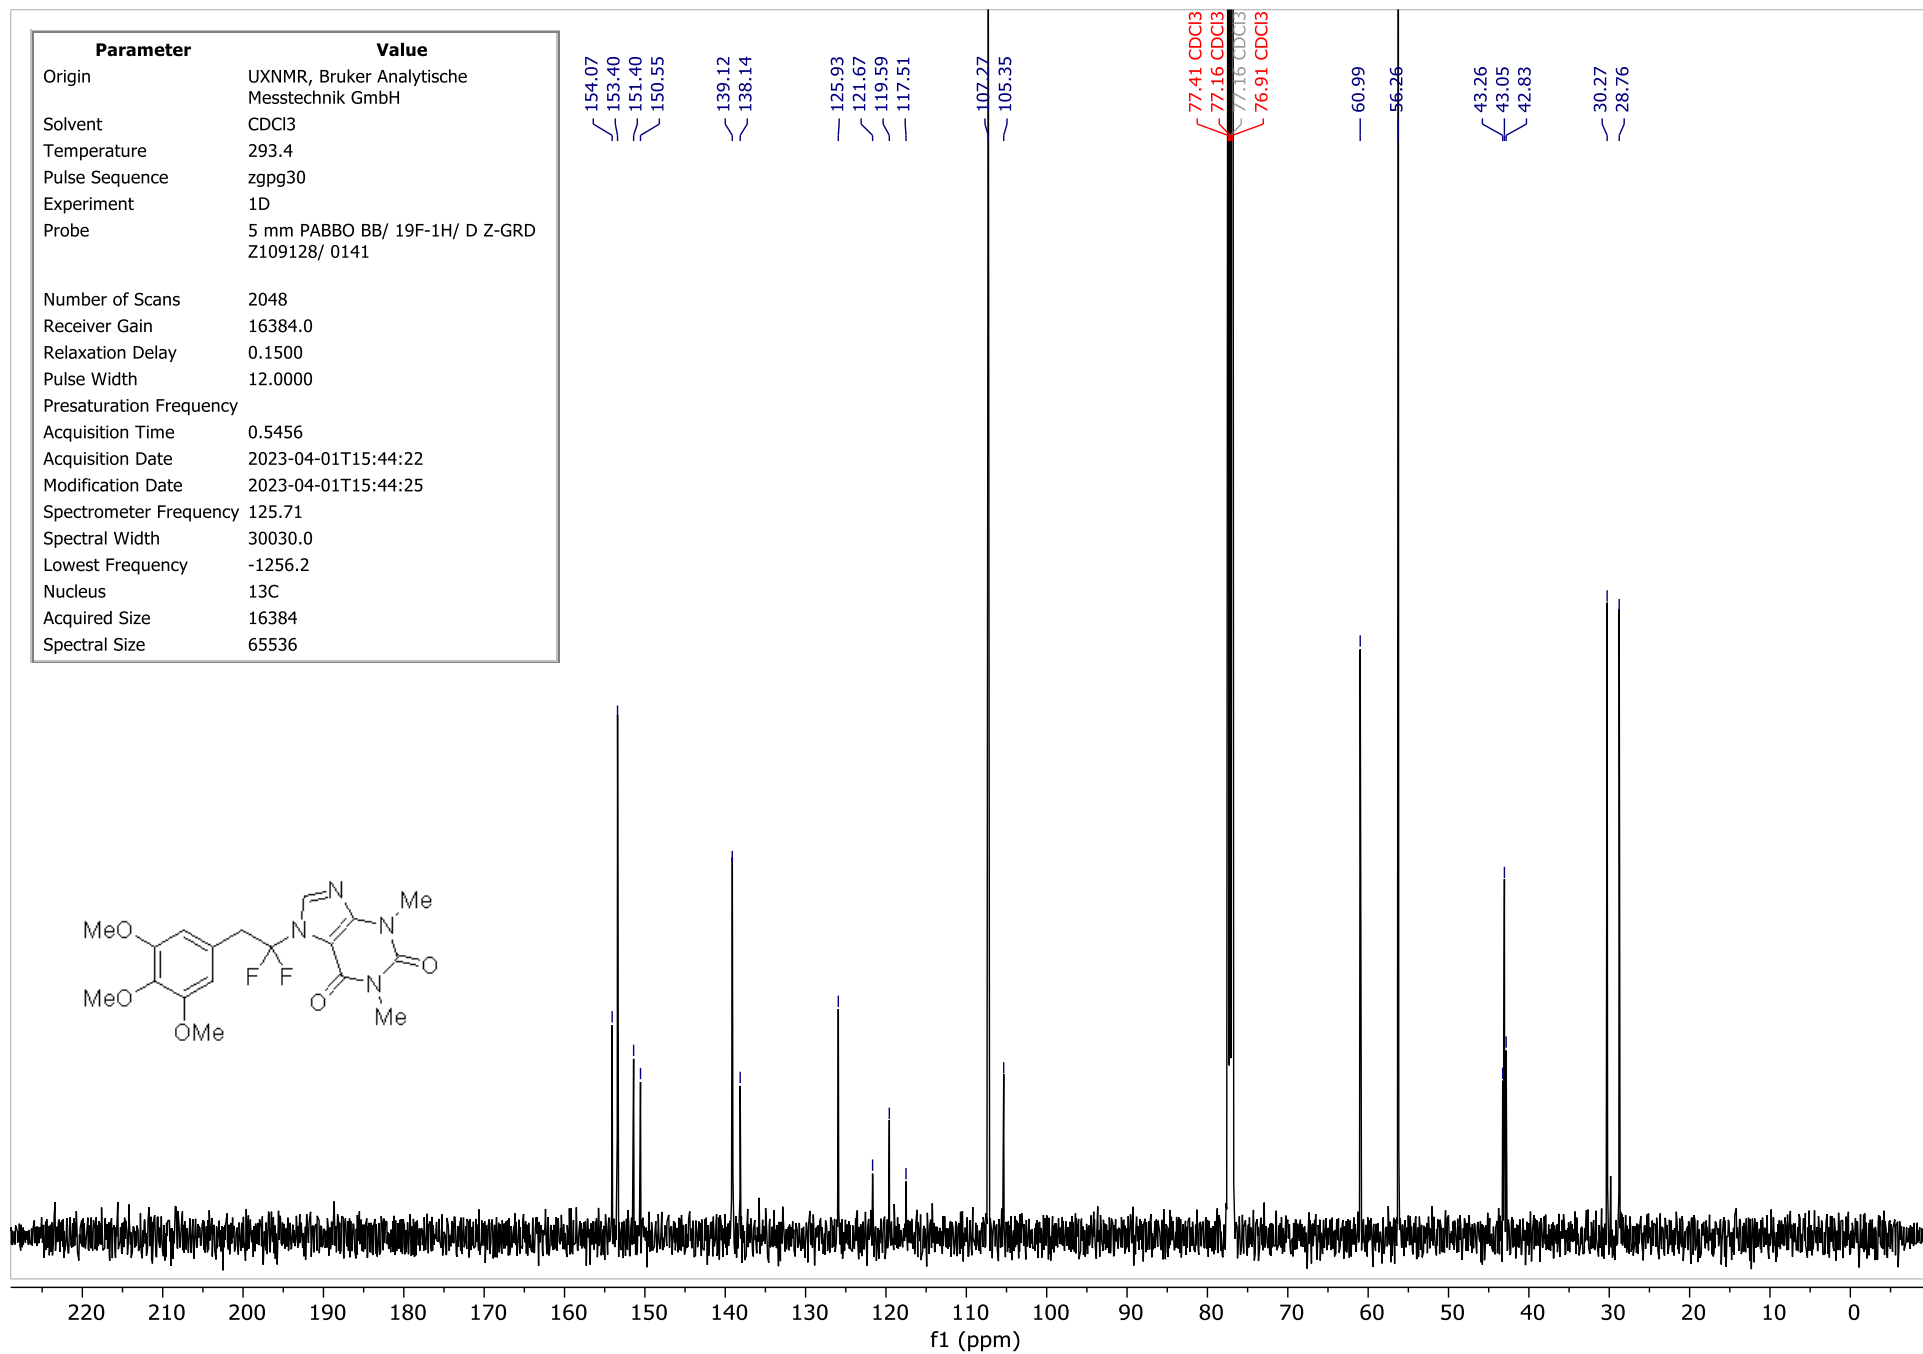

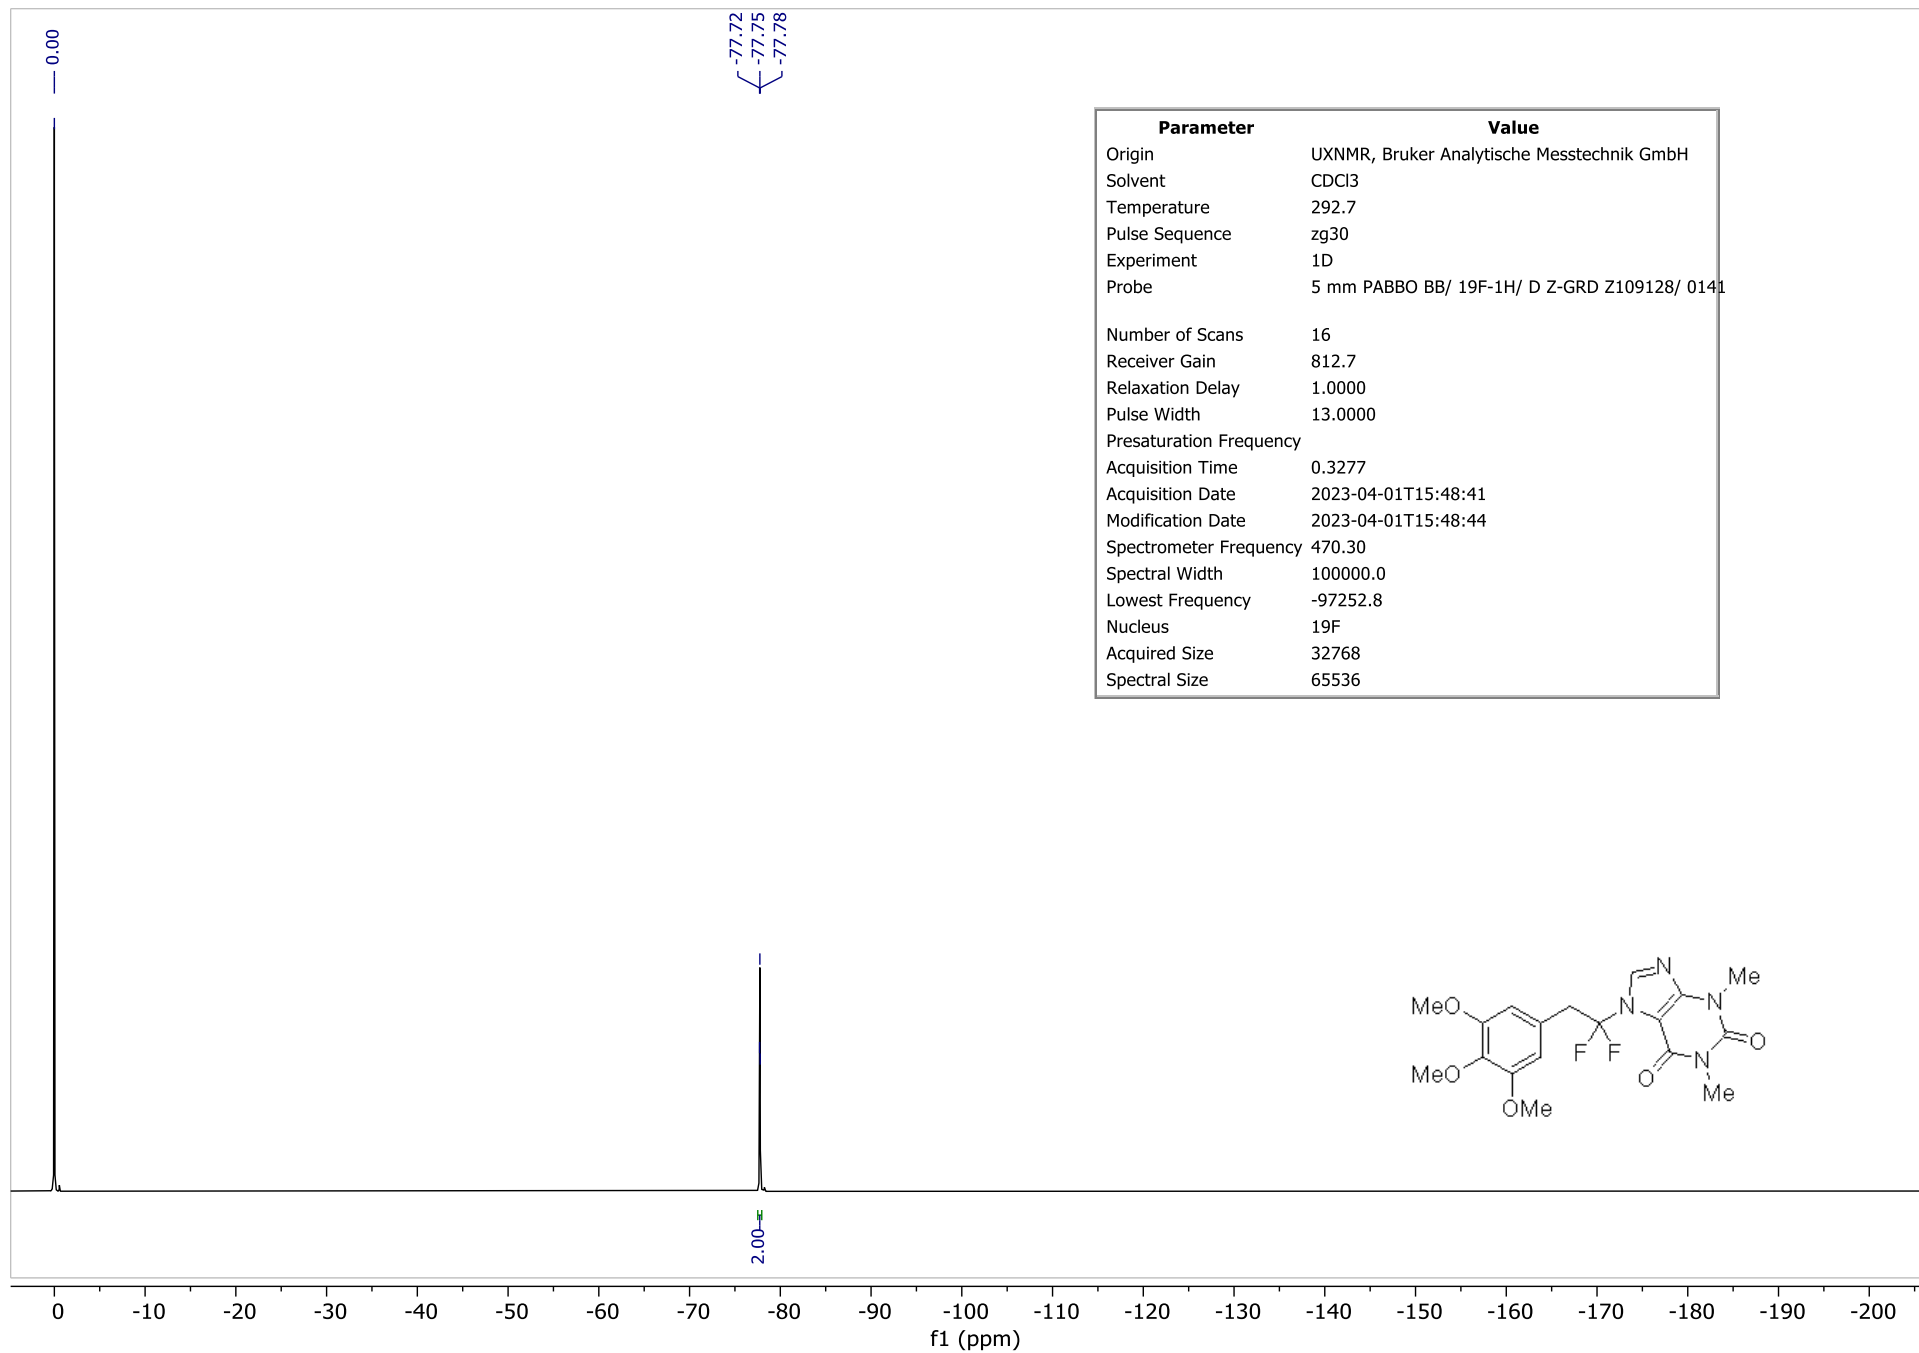

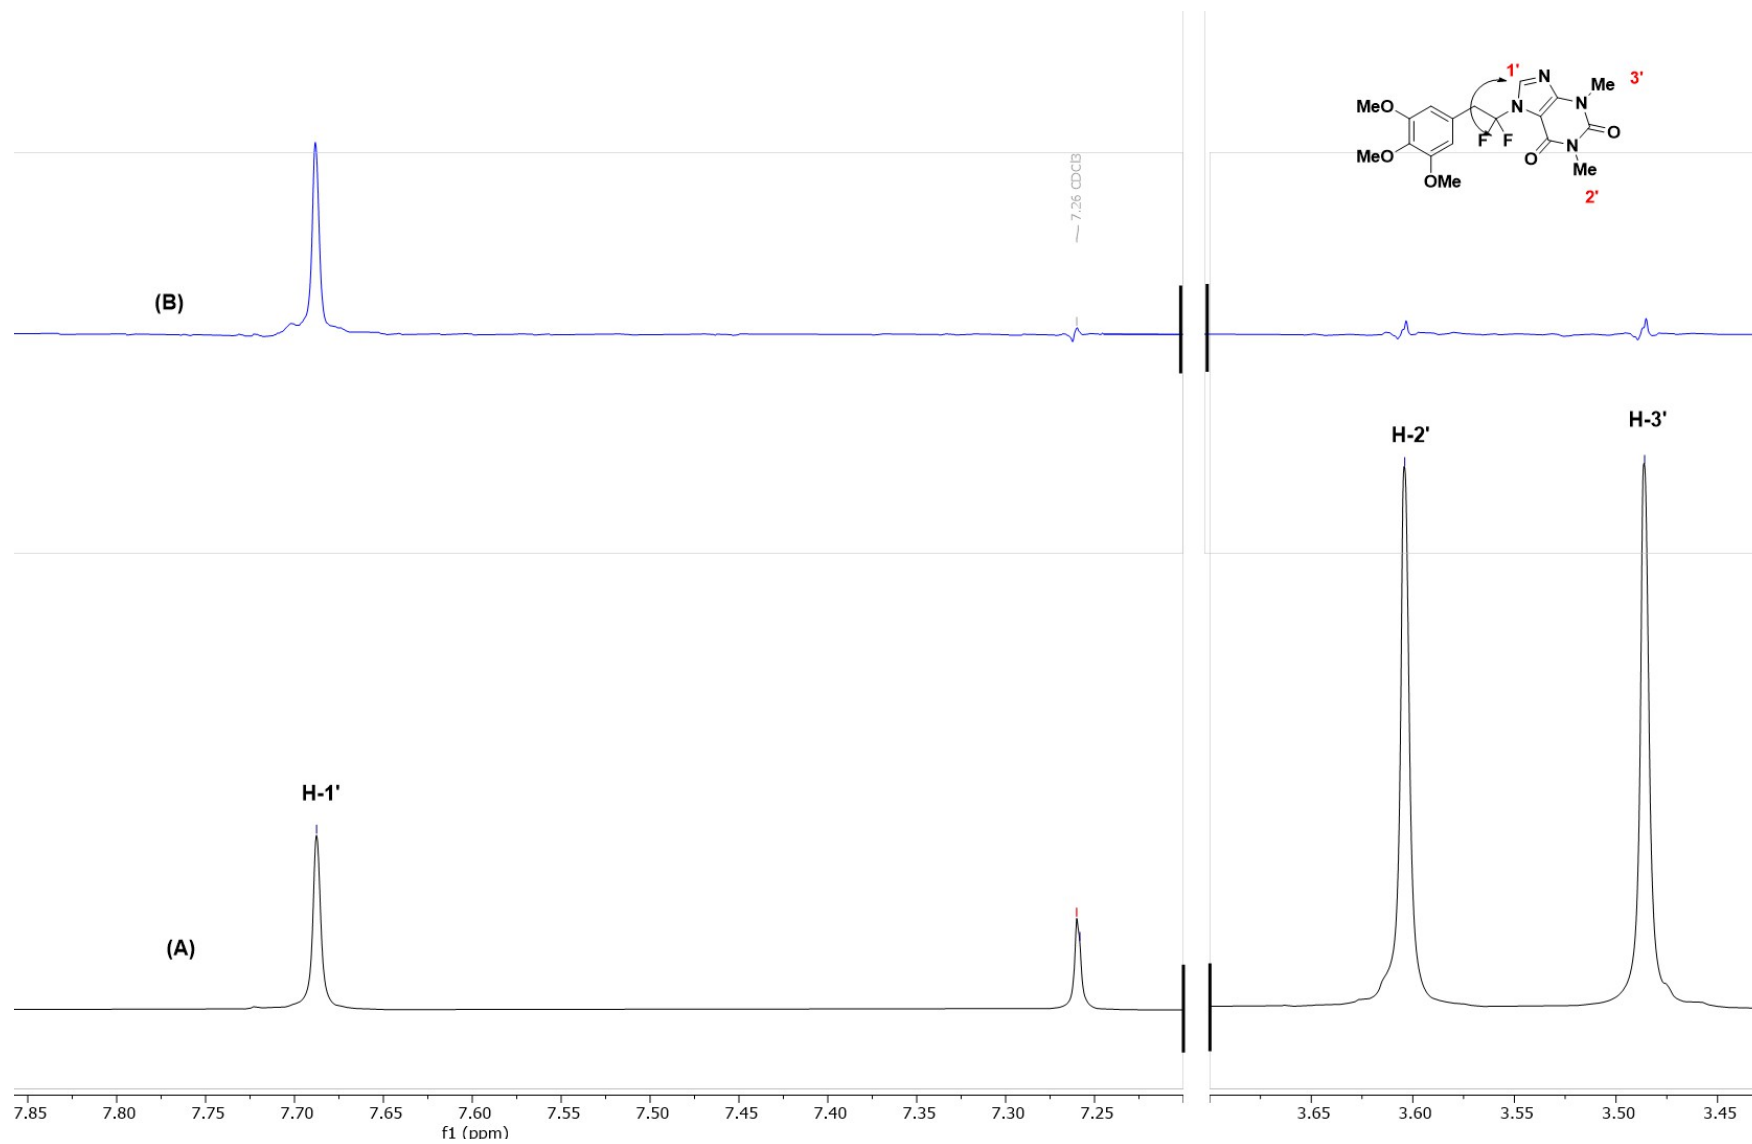

(A)  $^1\text{H}$  NMR spectrum of **11ai**. (B)  $^1\text{H}\{^{19}\text{F}\}$  NOE difference spectrum after preirradiation of  $^{19}\text{F}$   $\delta$  -77.15.

# NMR spectra for 5-chloro-6-(2,3-dichlorophenoxy)-1-(1,1-difluoro-2-(3,4,5-trimethoxyphenyl)ethyl)-2-(methylthio)-1H-benzo[d]imidazole (**11aj**)

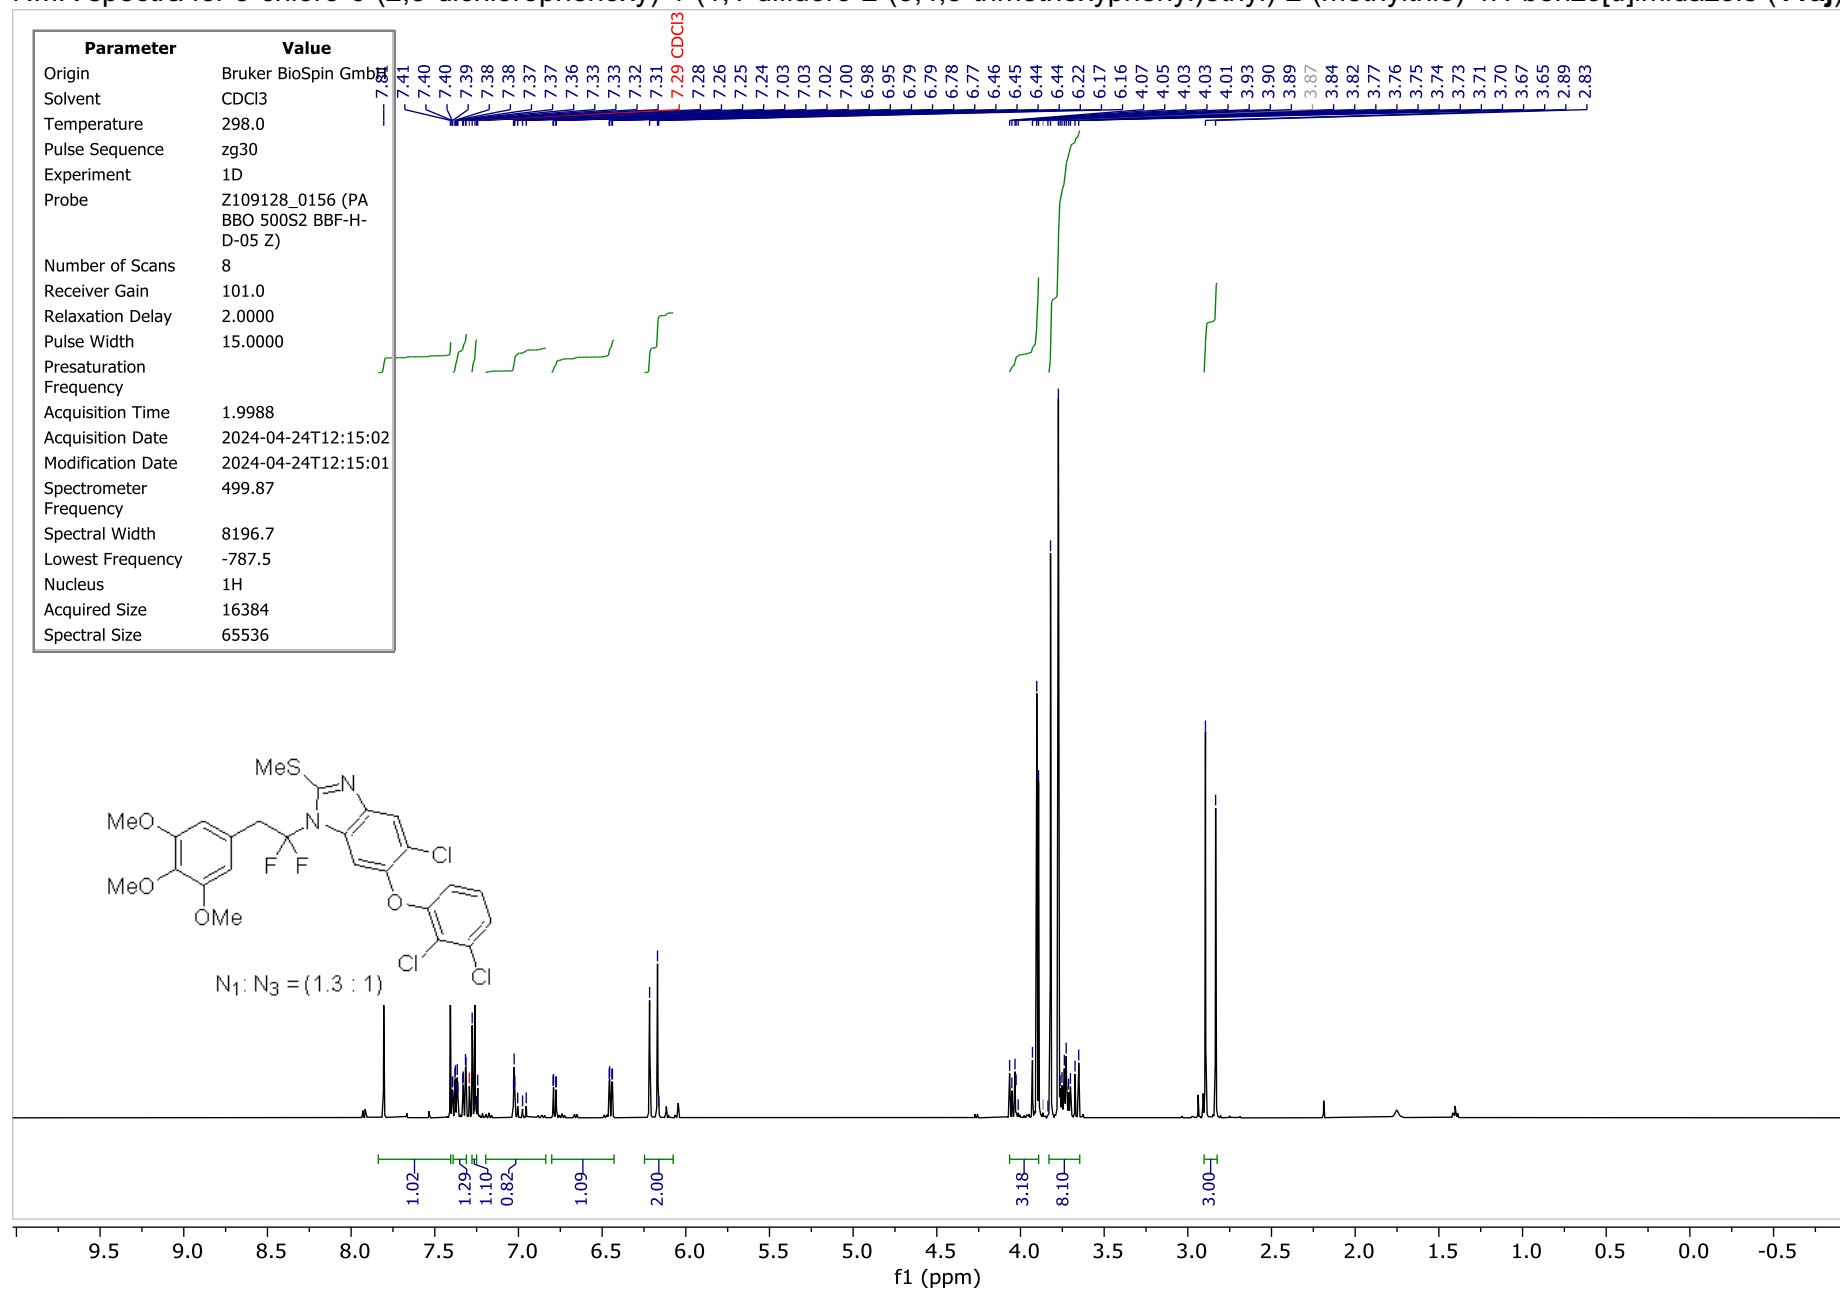

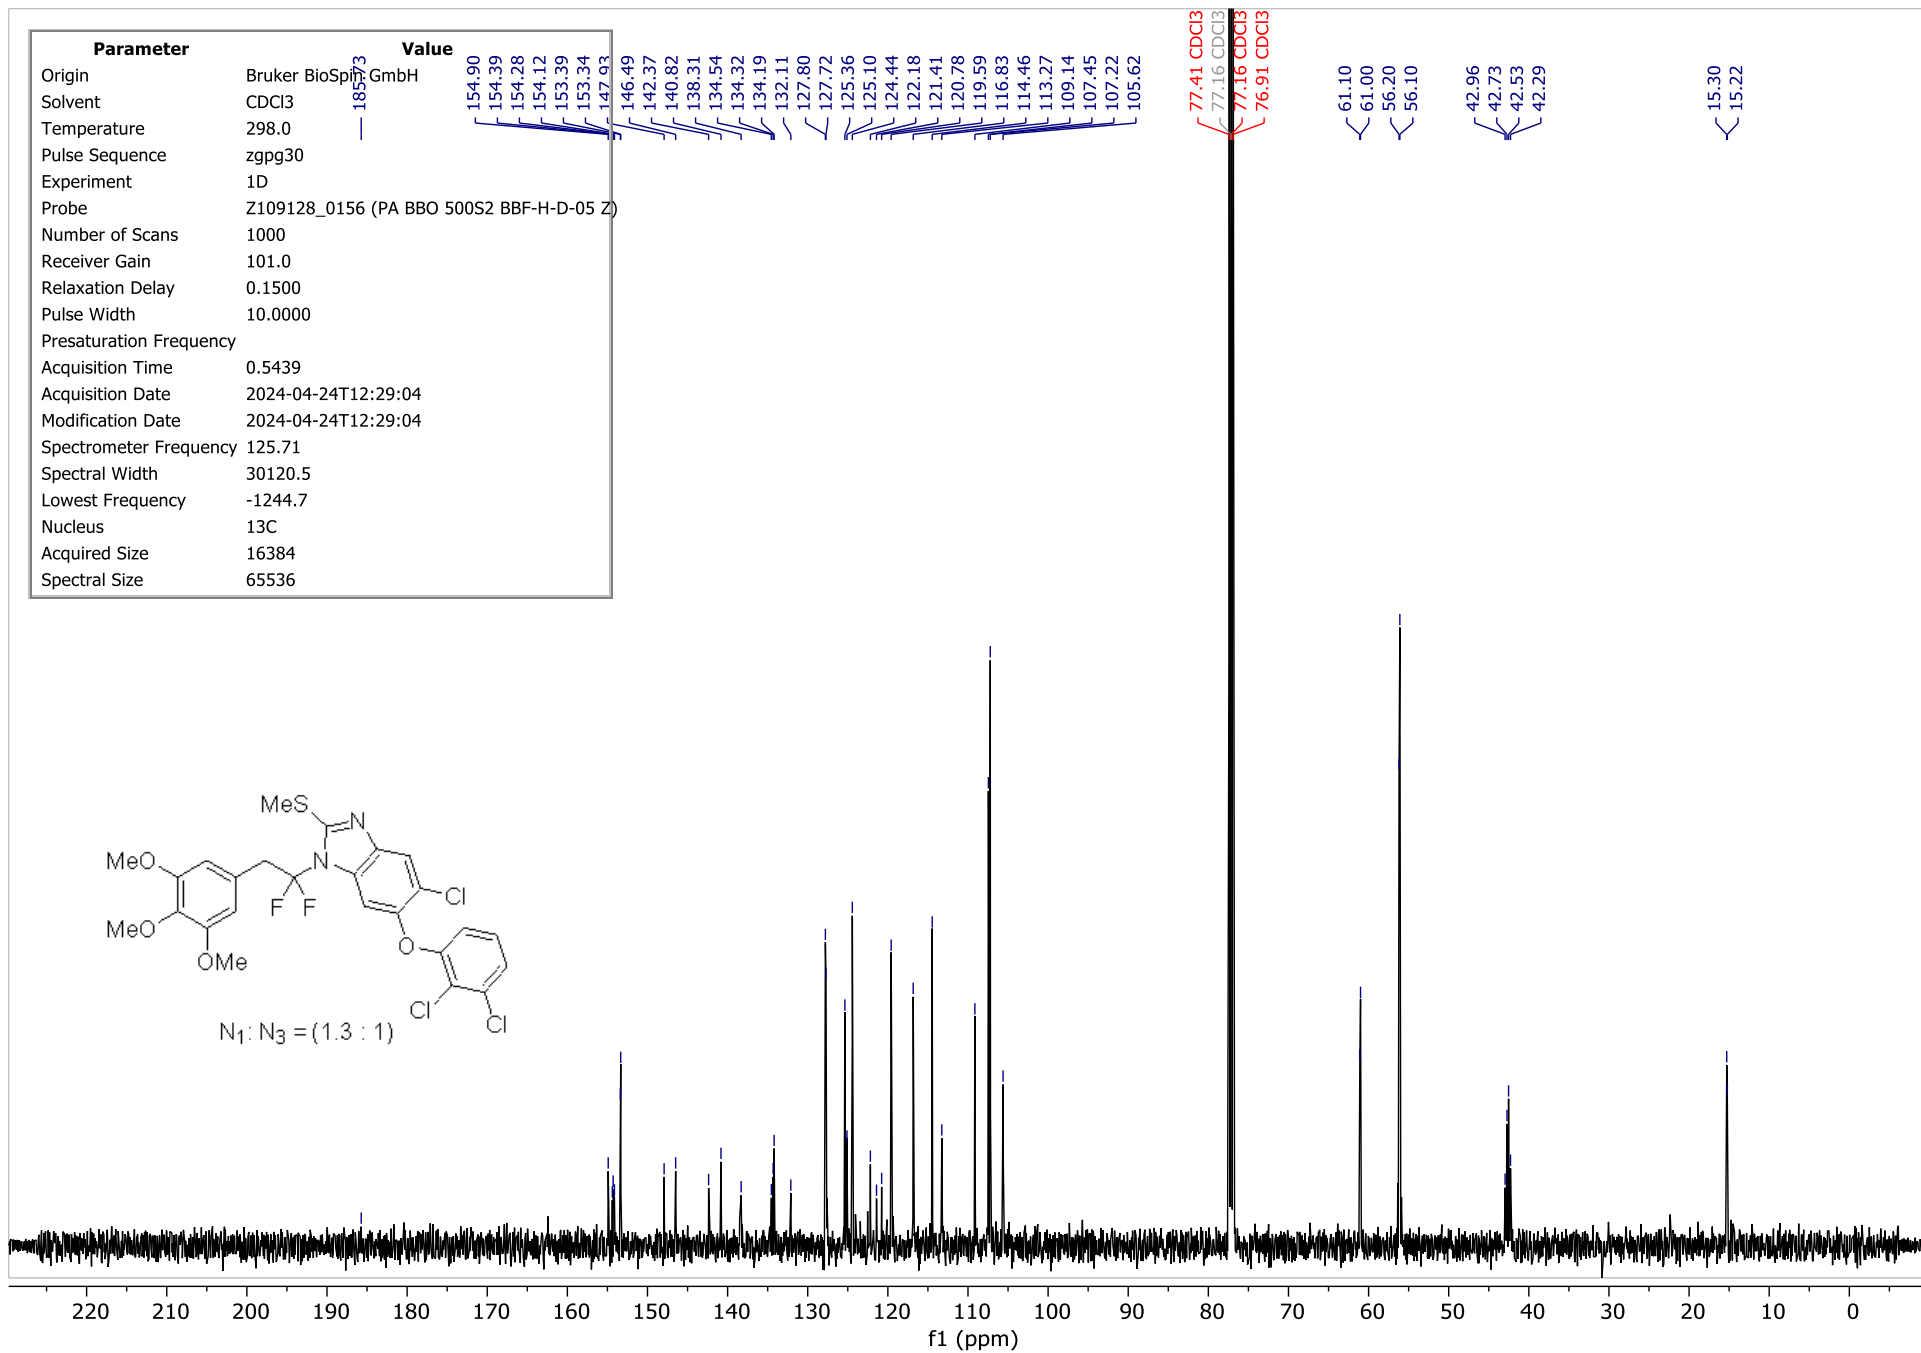



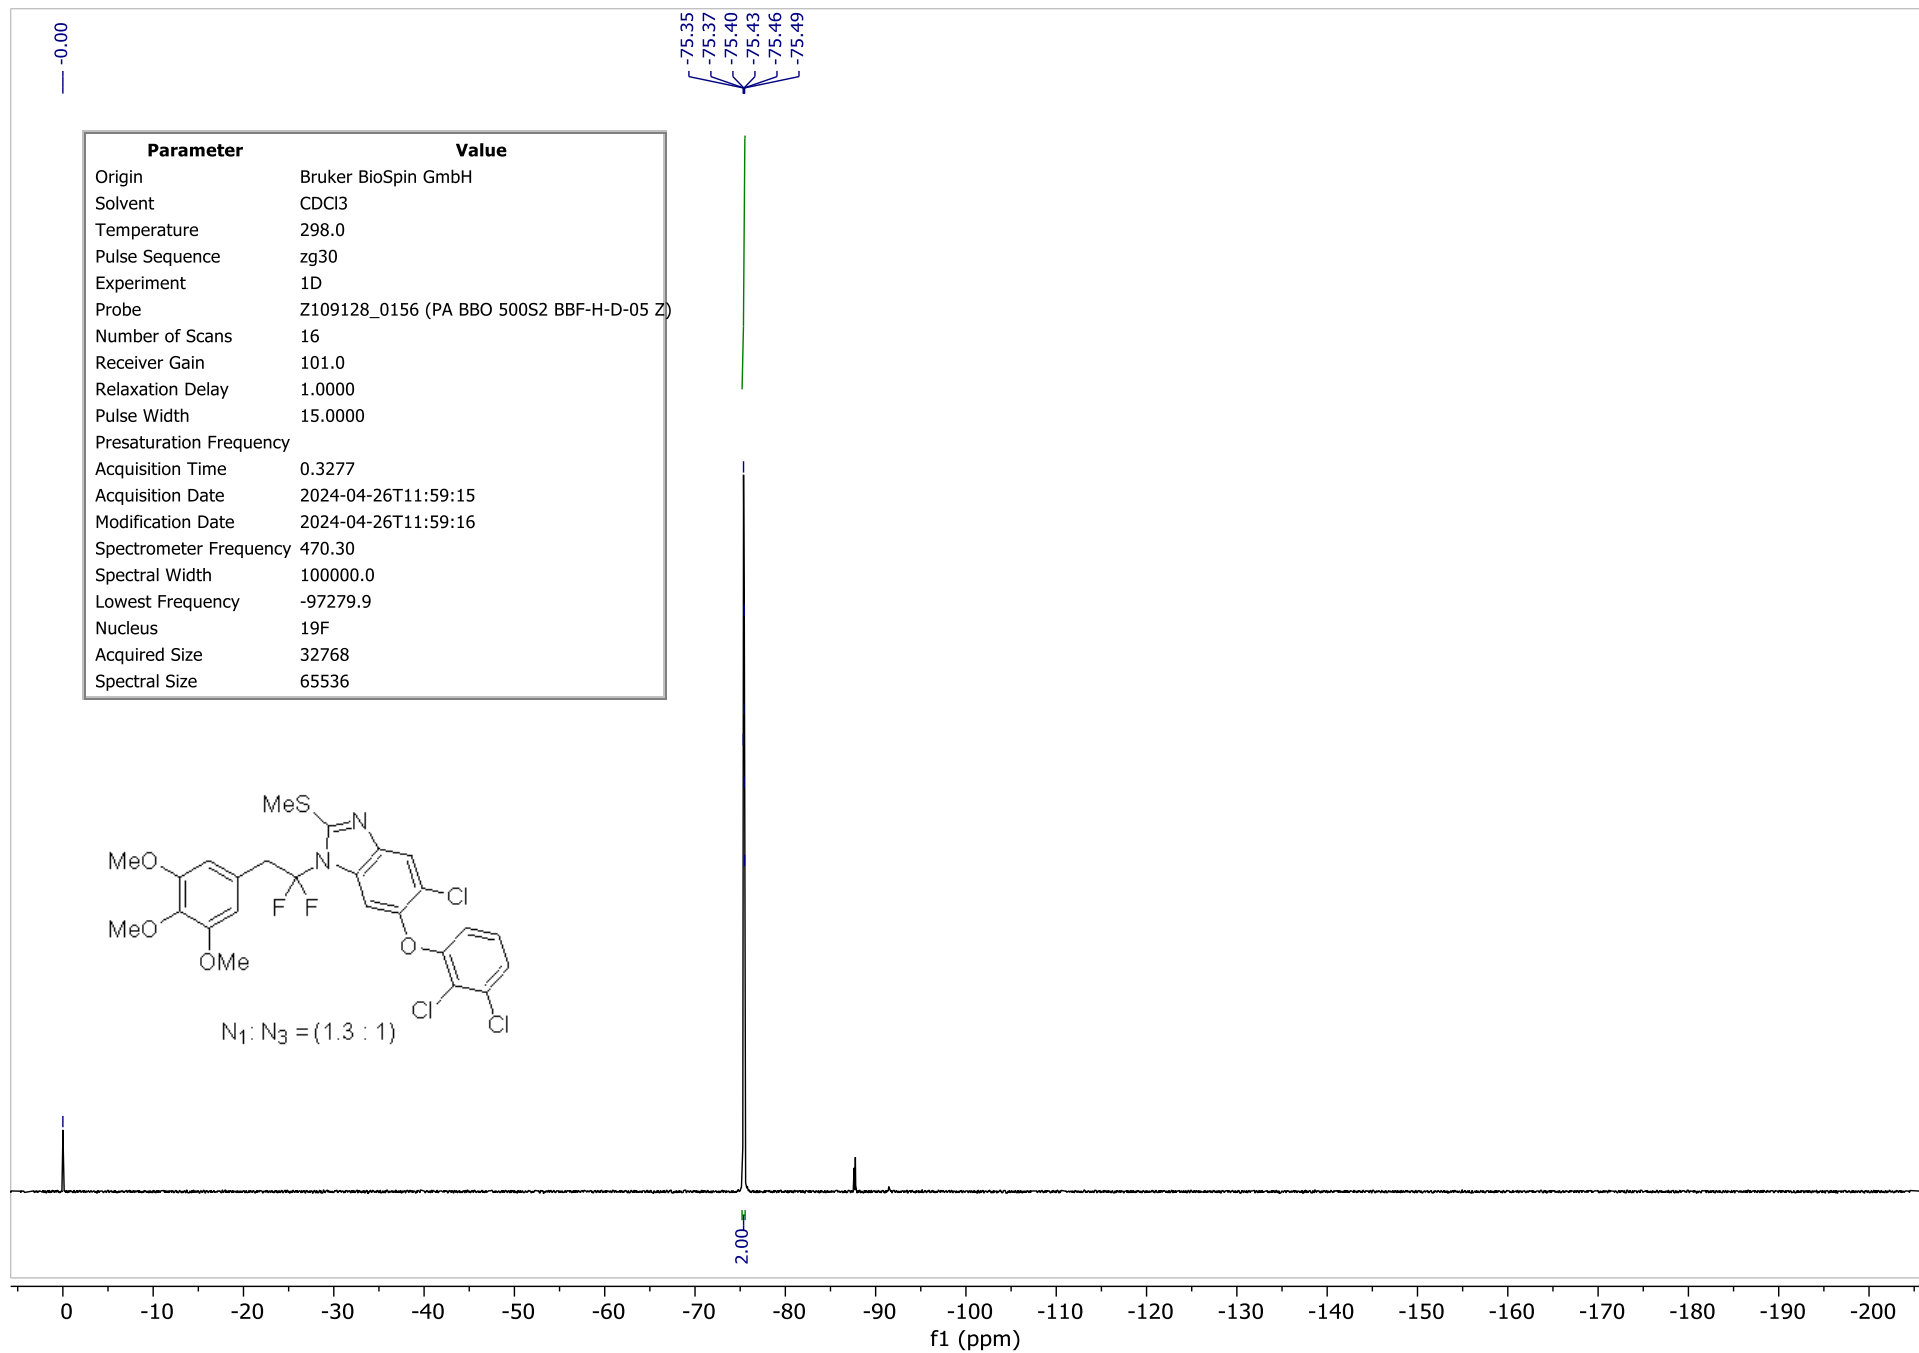

NMR spectra for 7-(1,1-difluoro-2-(3,4,5-trimethoxyphenyl)ethyl)-7H-pyrrolo[2,3-b]pyridine (**11ak**)

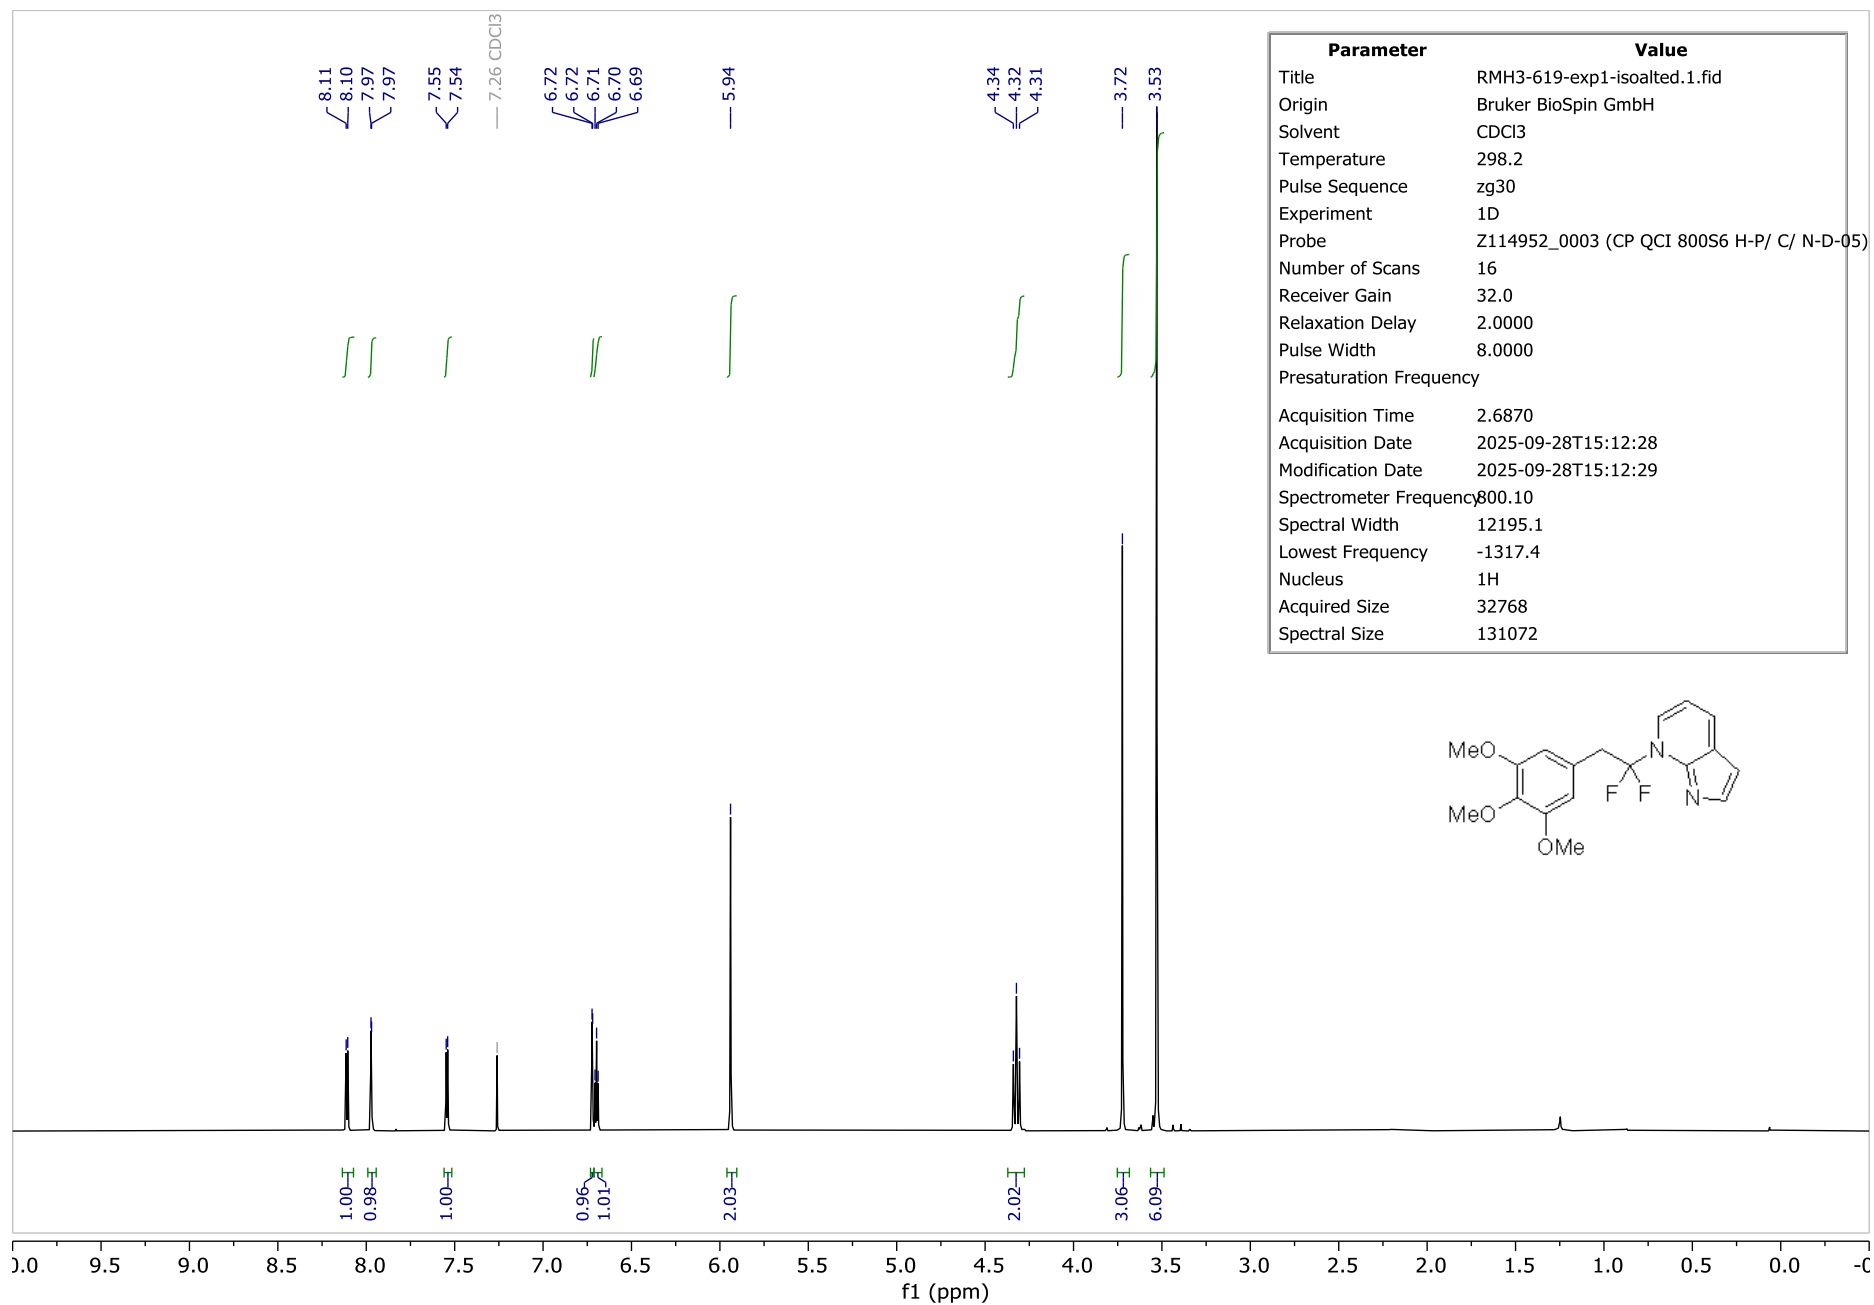

| Parameter               | Value                                 |
|-------------------------|---------------------------------------|
| Title                   | RMH3-619-exp1-isoalted.2.fid          |
| Origin                  | Bruker BioSpin GmbH                   |
| Solvent                 | CDCl3                                 |
| Temperature             | 298.2                                 |
| Pulse Sequence          | zgpg30                                |
| Experiment              | 1D                                    |
| Probe                   | Z114952_0003 (CP QCI 800S6 H-P/ C/ N- |
|                         | D-05)                                 |
| Number of Scans         | 461                                   |
| Receiver Gain           | 912.0                                 |
| Relaxation Delay        | 0.1500                                |
| Pulse Width             | 12.0000                               |
| Presaturation Frequency |                                       |
| Acquisition Time        | 0.6554                                |
| Acquisition Date        | 2025-09-28T15:21:37                   |
| Modification Date       | 2025-09-28T15:21:37                   |
| Spectrometer Frequency  | 201.21                                |
| Spectral Width          | 50000.0                               |
| Lowest Frequency        | -2984.8                               |
| Nucleus                 | <sup>13</sup> C                       |
| Acquired Size           | 32768                                 |
| Spectral Size           | 65536                                 |

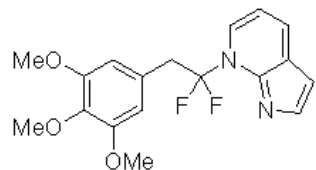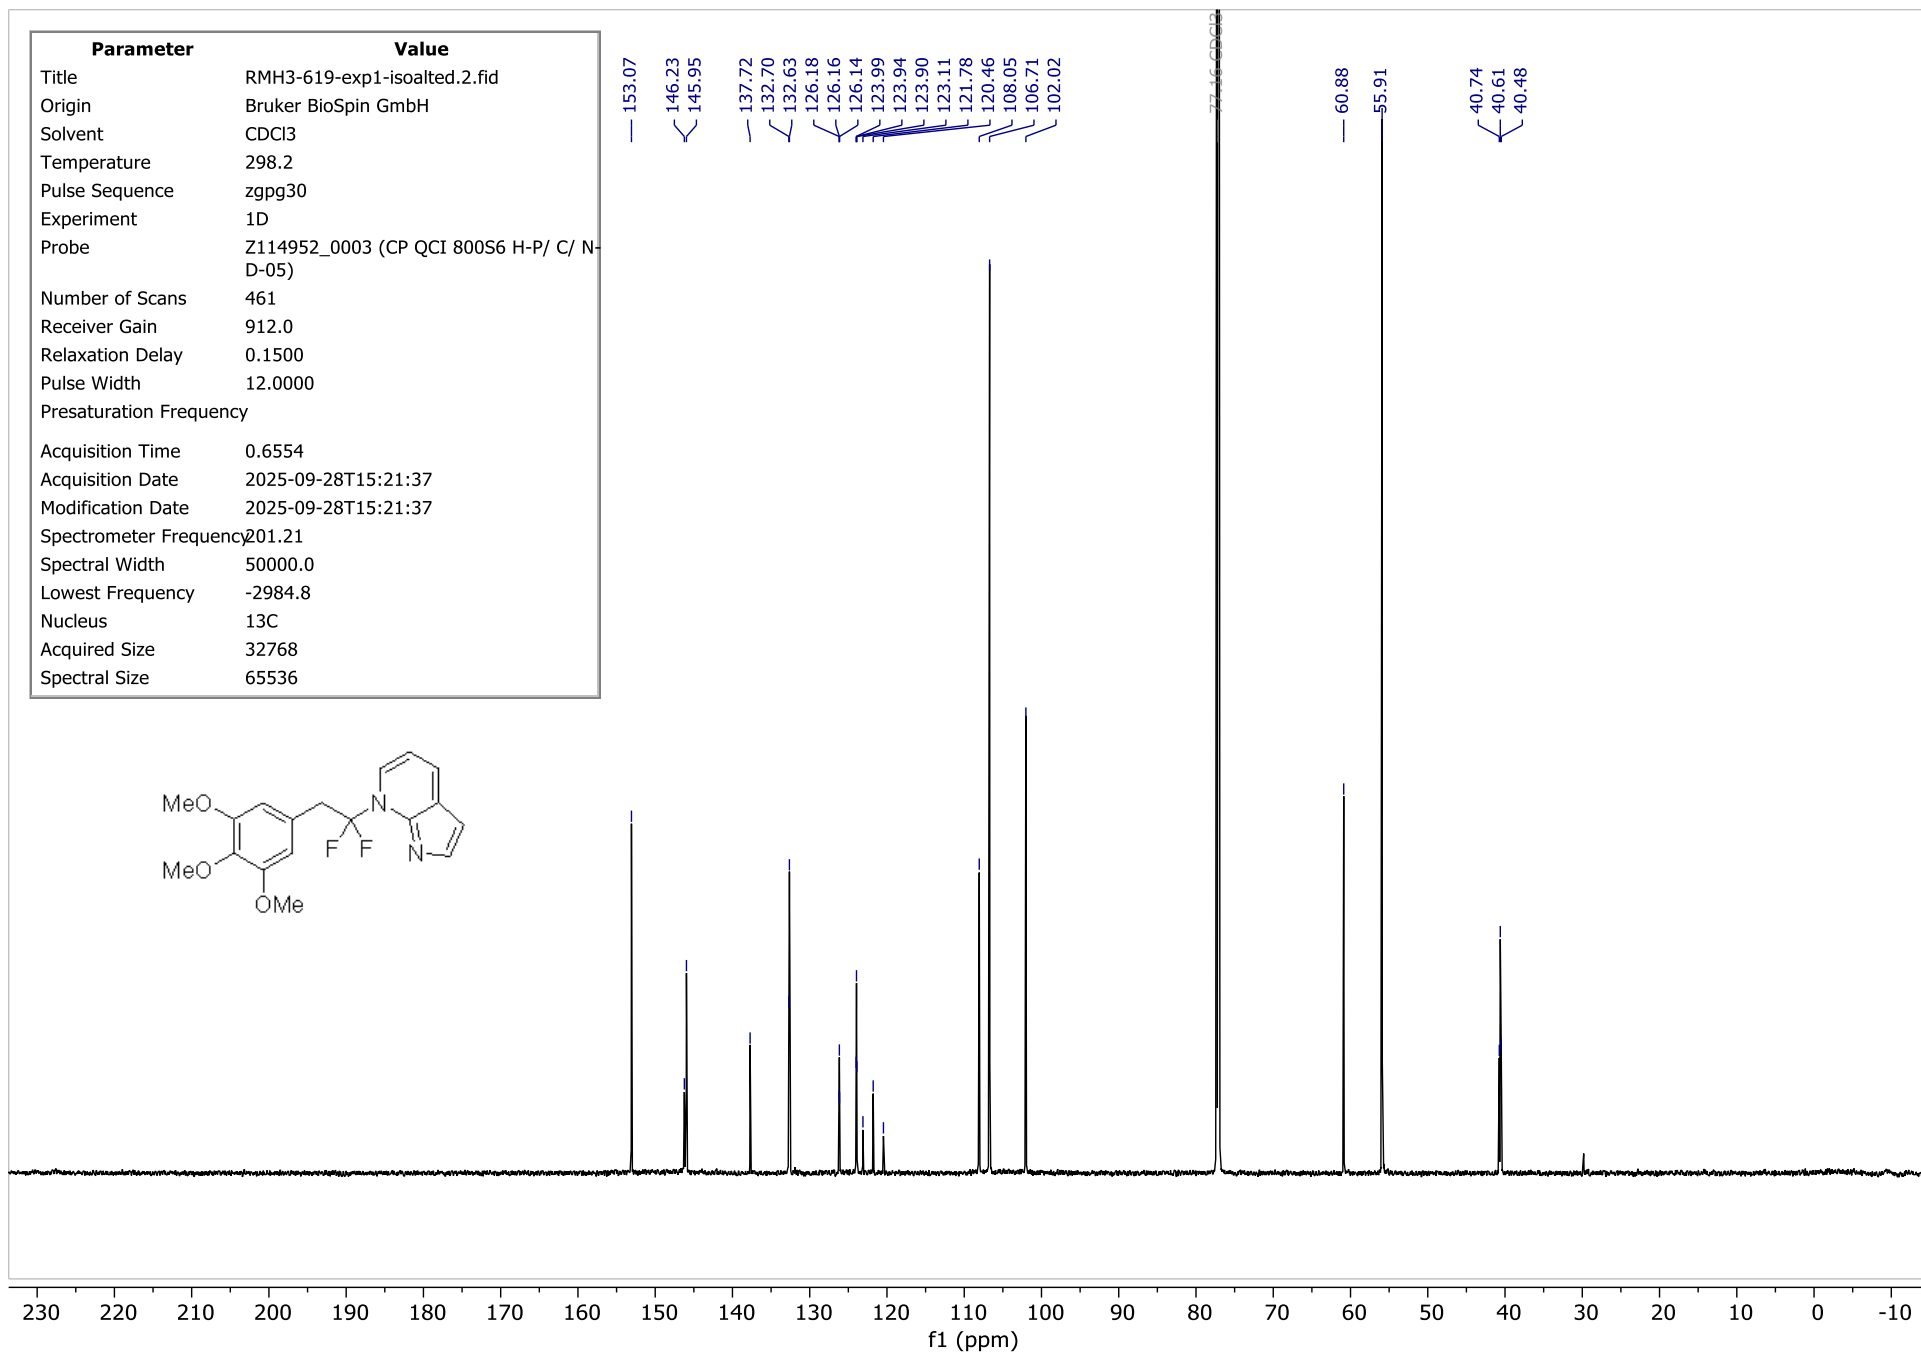

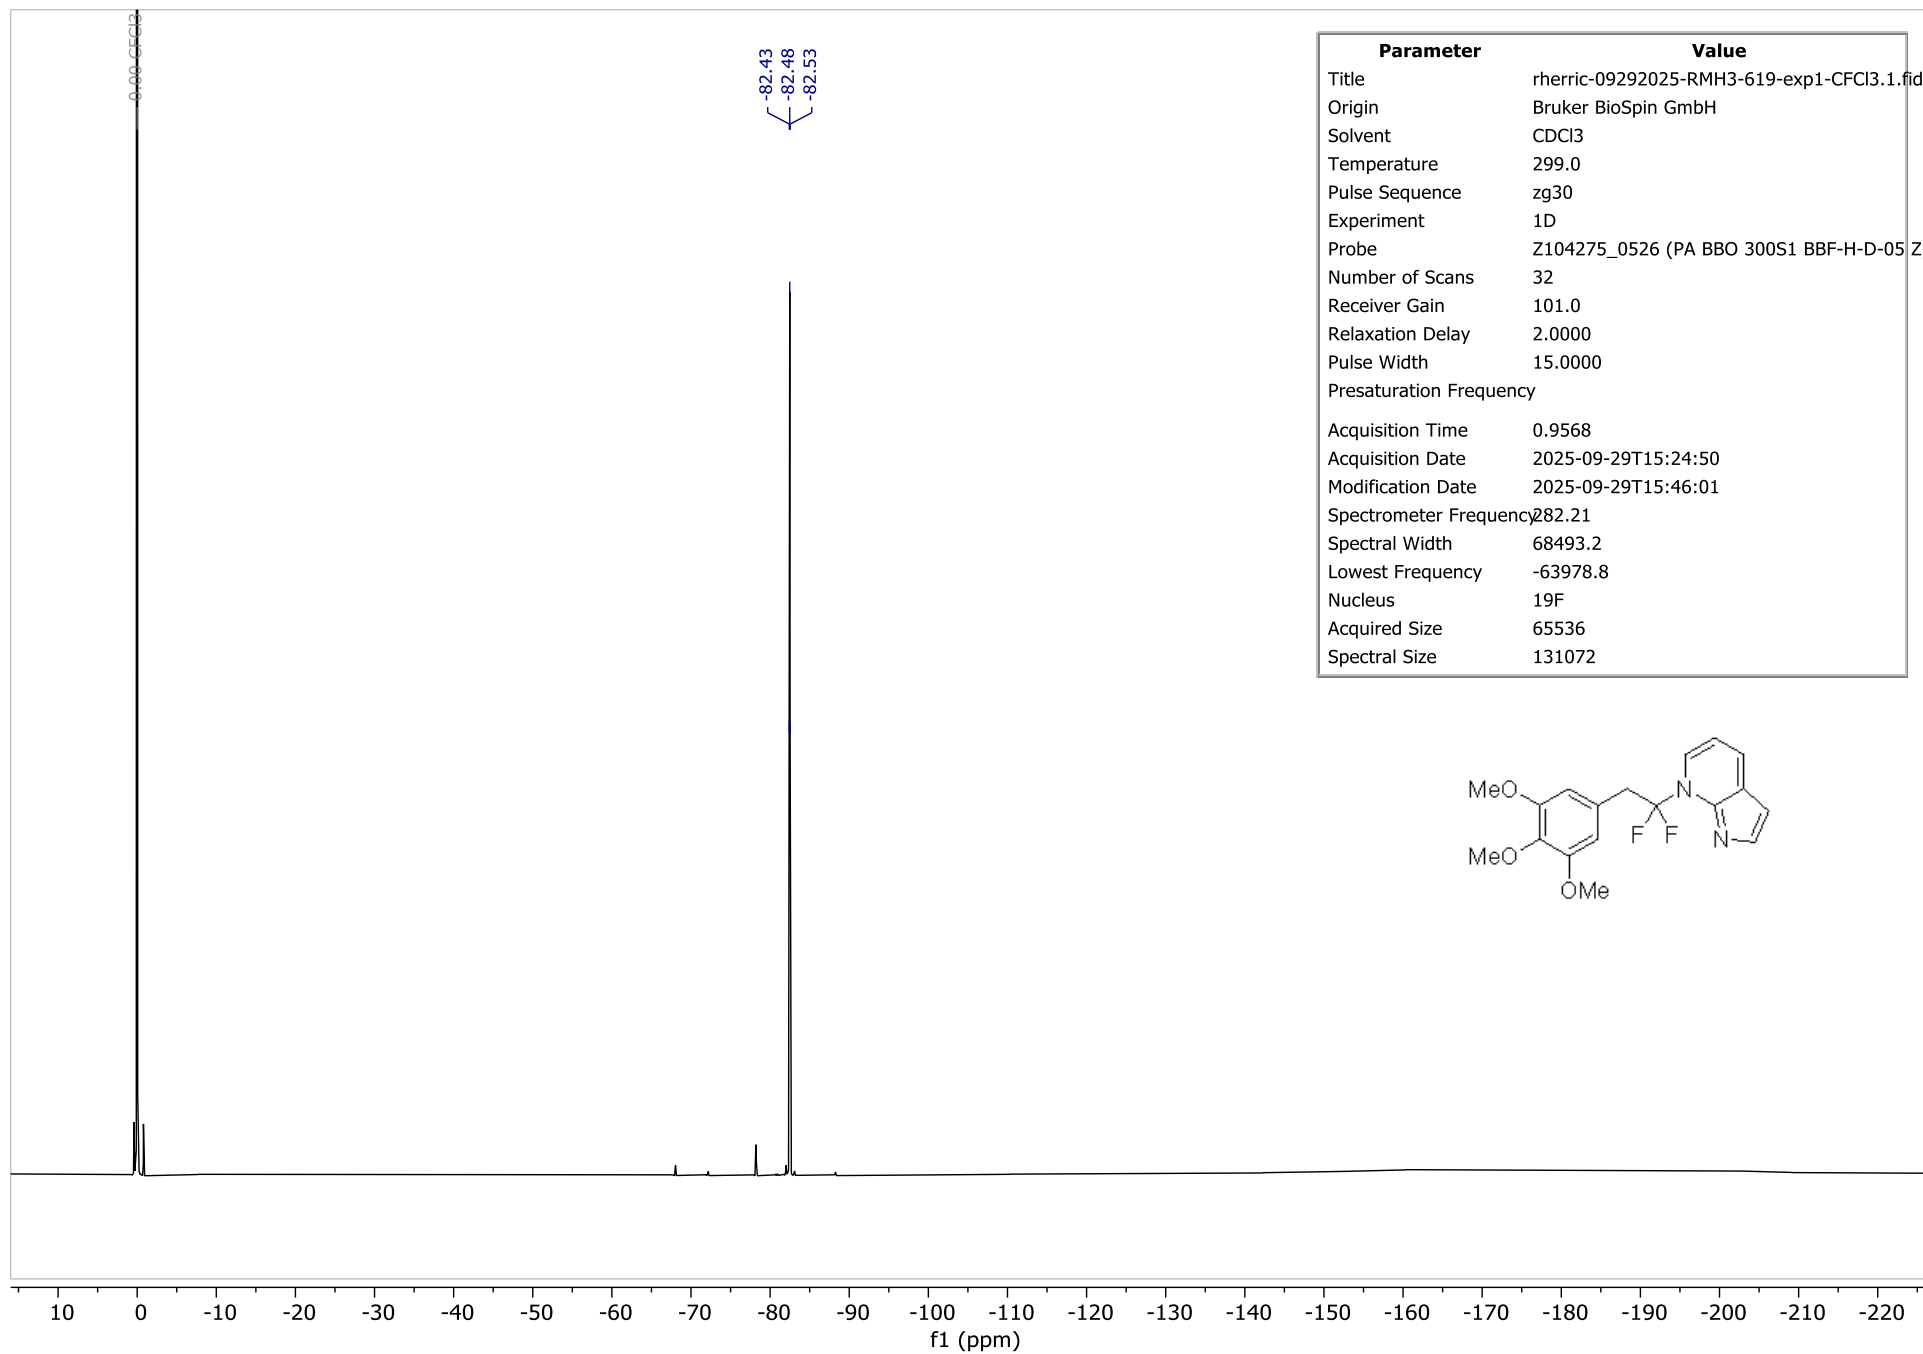

# NMR spectra for 3-bromo-7-(1,1-difluoro-2-(3,4,5-trimethoxyphenyl)ethyl)-7H-pyrrolo[2,3-*b*]pyridine (**11al**)

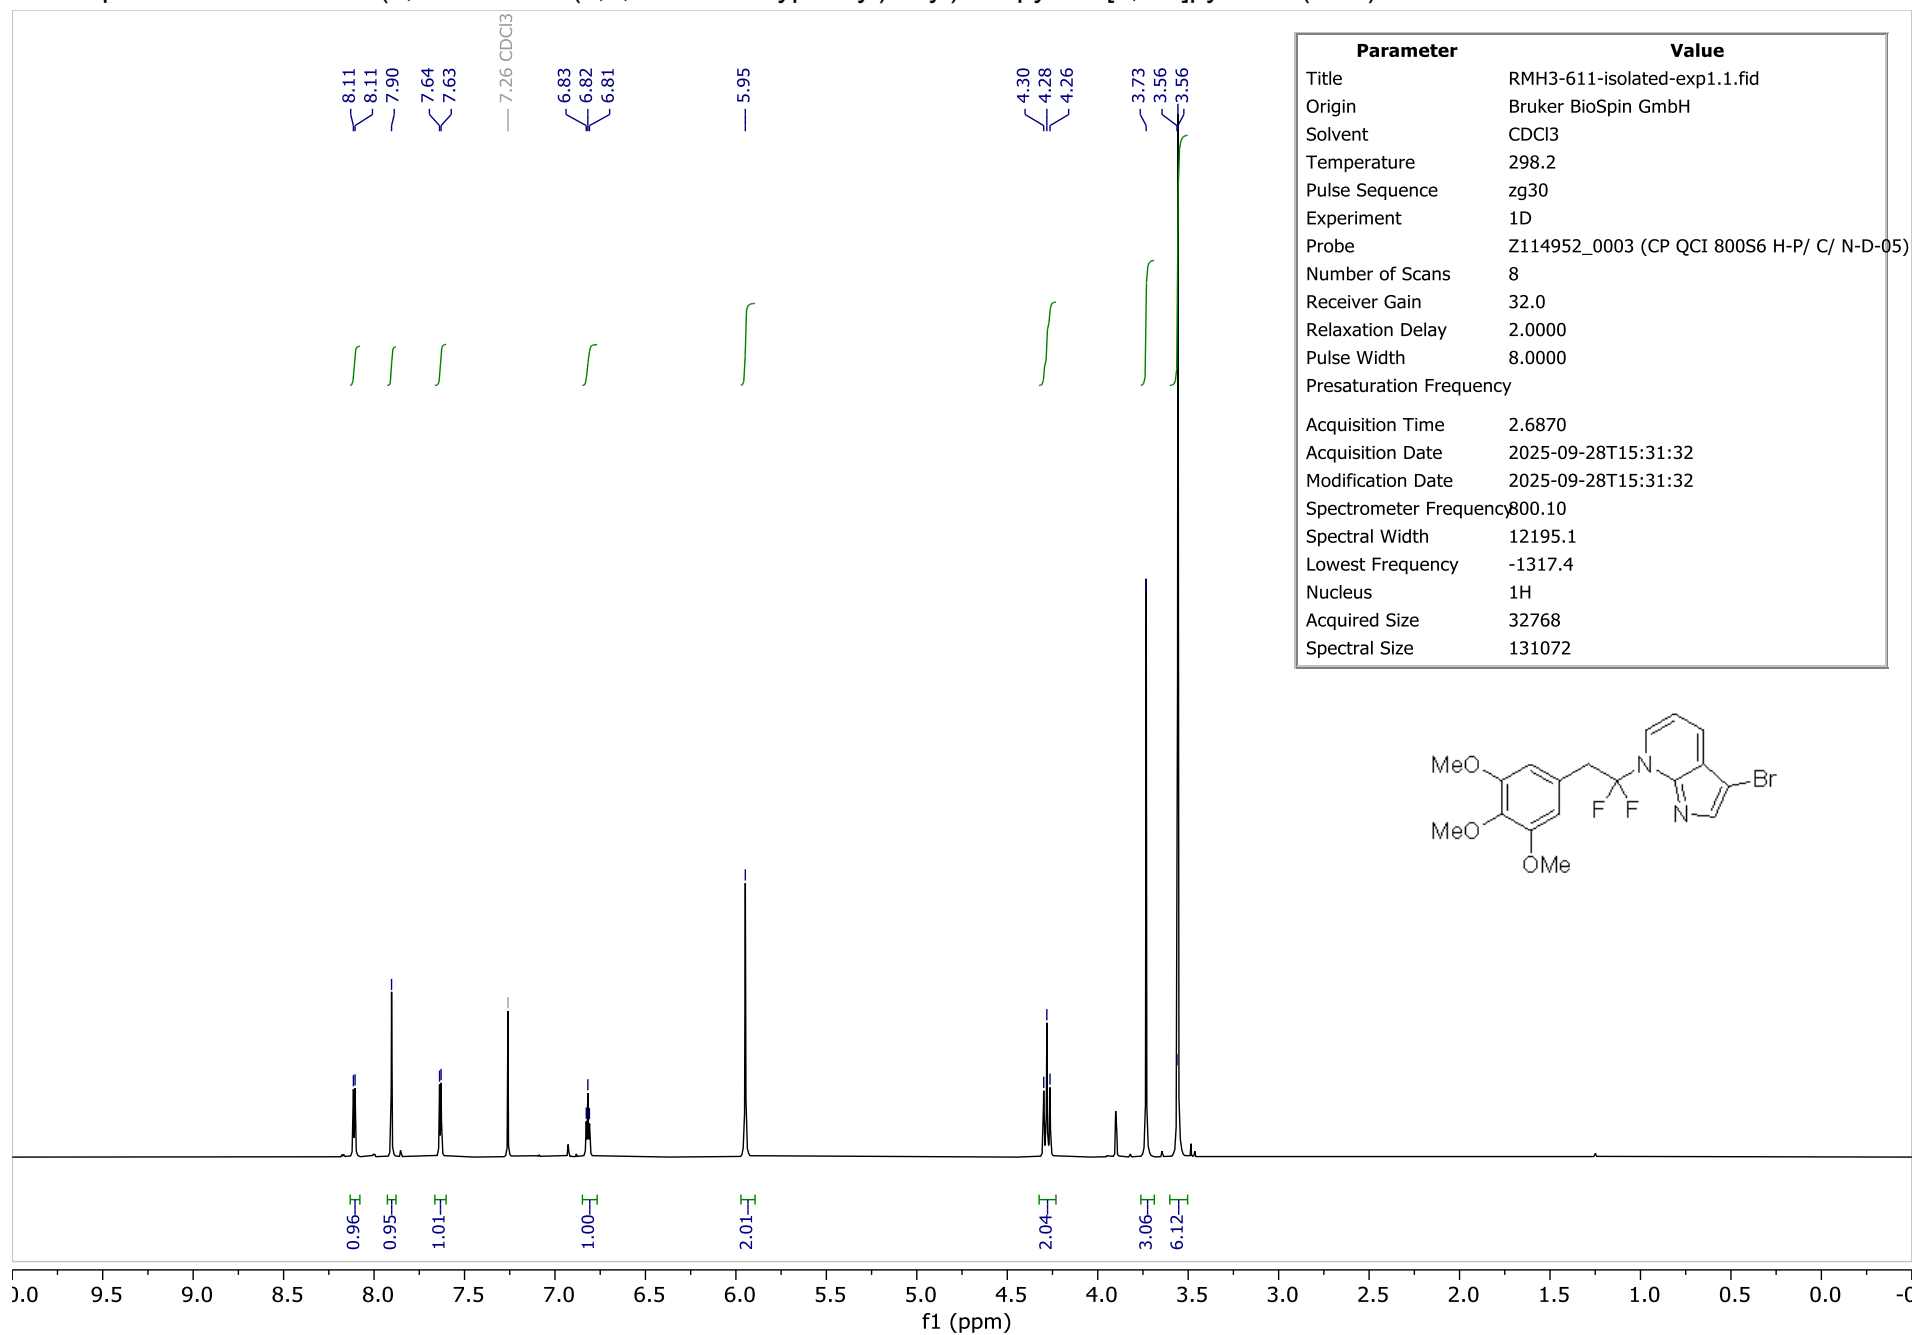

| Parameter               | Value                                      |
|-------------------------|--------------------------------------------|
| Title                   | RMH3-611-isolated-exp1.1.fid               |
| Origin                  | Bruker BioSpin GmbH                        |
| Solvent                 | CDCl3                                      |
| Temperature             | 298.2                                      |
| Pulse Sequence          | zg30                                       |
| Experiment              | 1D                                         |
| Probe                   | Z114952_0003 (CP QCI 800S6 H-P/ C/ N-D-05) |
| Number of Scans         | 8                                          |
| Receiver Gain           | 32.0                                       |
| Relaxation Delay        | 2.0000                                     |
| Pulse Width             | 8.0000                                     |
| Presaturation Frequency |                                            |
| Acquisition Time        | 2.6870                                     |
| Acquisition Date        | 2025-09-28T15:31:32                        |
| Modification Date       | 2025-09-28T15:31:32                        |
| Spectrometer Frequency  | 800.10                                     |
| Spectral Width          | 12195.1                                    |
| Lowest Frequency        | -1317.4                                    |
| Nucleus                 | 1H                                         |
| Acquired Size           | 32768                                      |
| Spectral Size           | 131072                                     |

| Parameter               | Value                                      |
|-------------------------|--------------------------------------------|
| Title                   | RMH3-611-isolated-exp1.2.fid               |
| Origin                  | Bruker BioSpin GmbH                        |
| Solvent                 | CDCl3                                      |
| Temperature             | 298.2                                      |
| Pulse Sequence          | zgpg30                                     |
| Experiment              | 1D                                         |
| Probe                   | Z114952_0003 (CP QCI 800S6 H-P/ C/ N-D-05) |
| Number of Scans         | 1000                                       |
| Receiver Gain           | 912.0                                      |
| Relaxation Delay        | 0.1500                                     |
| Pulse Width             | 12.0000                                    |
| Presaturation Frequency |                                            |
| Acquisition Time        | 0.6554                                     |
| Acquisition Date        | 2025-09-28T15:47:33                        |
| Modification Date       | 2025-09-28T15:47:33                        |
| Spectrometer Frequency  | 201.21                                     |
| Spectral Width          | 50000.0                                    |
| Lowest Frequency        | -2982.4                                    |
| Nucleus                 | <sup>13</sup> C                            |
| Acquired Size           | 32768                                      |
| Spectral Size           | 65536                                      |

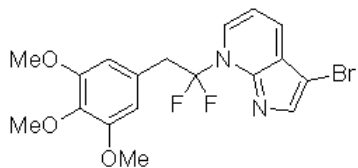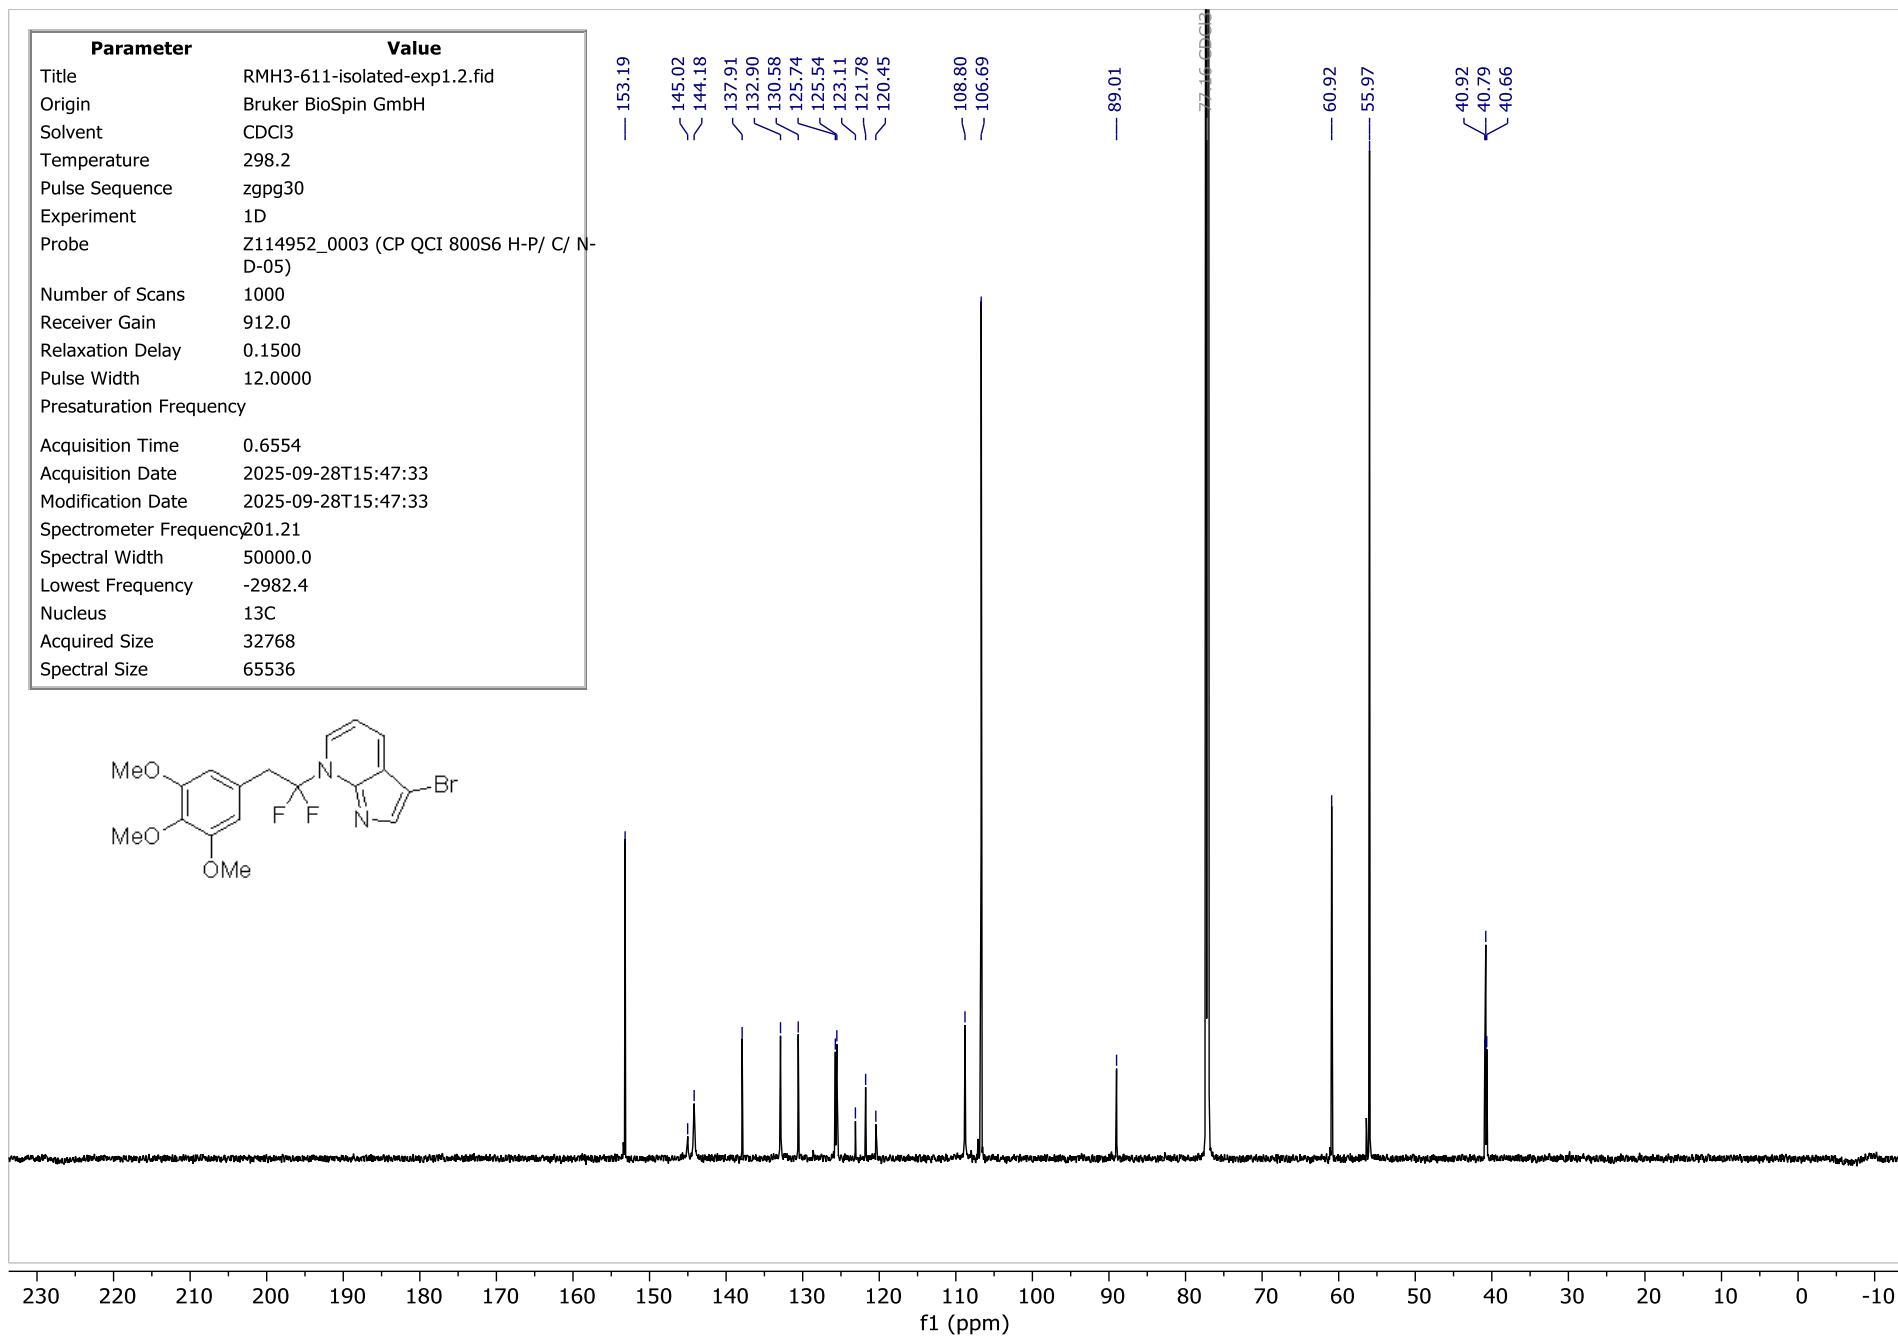

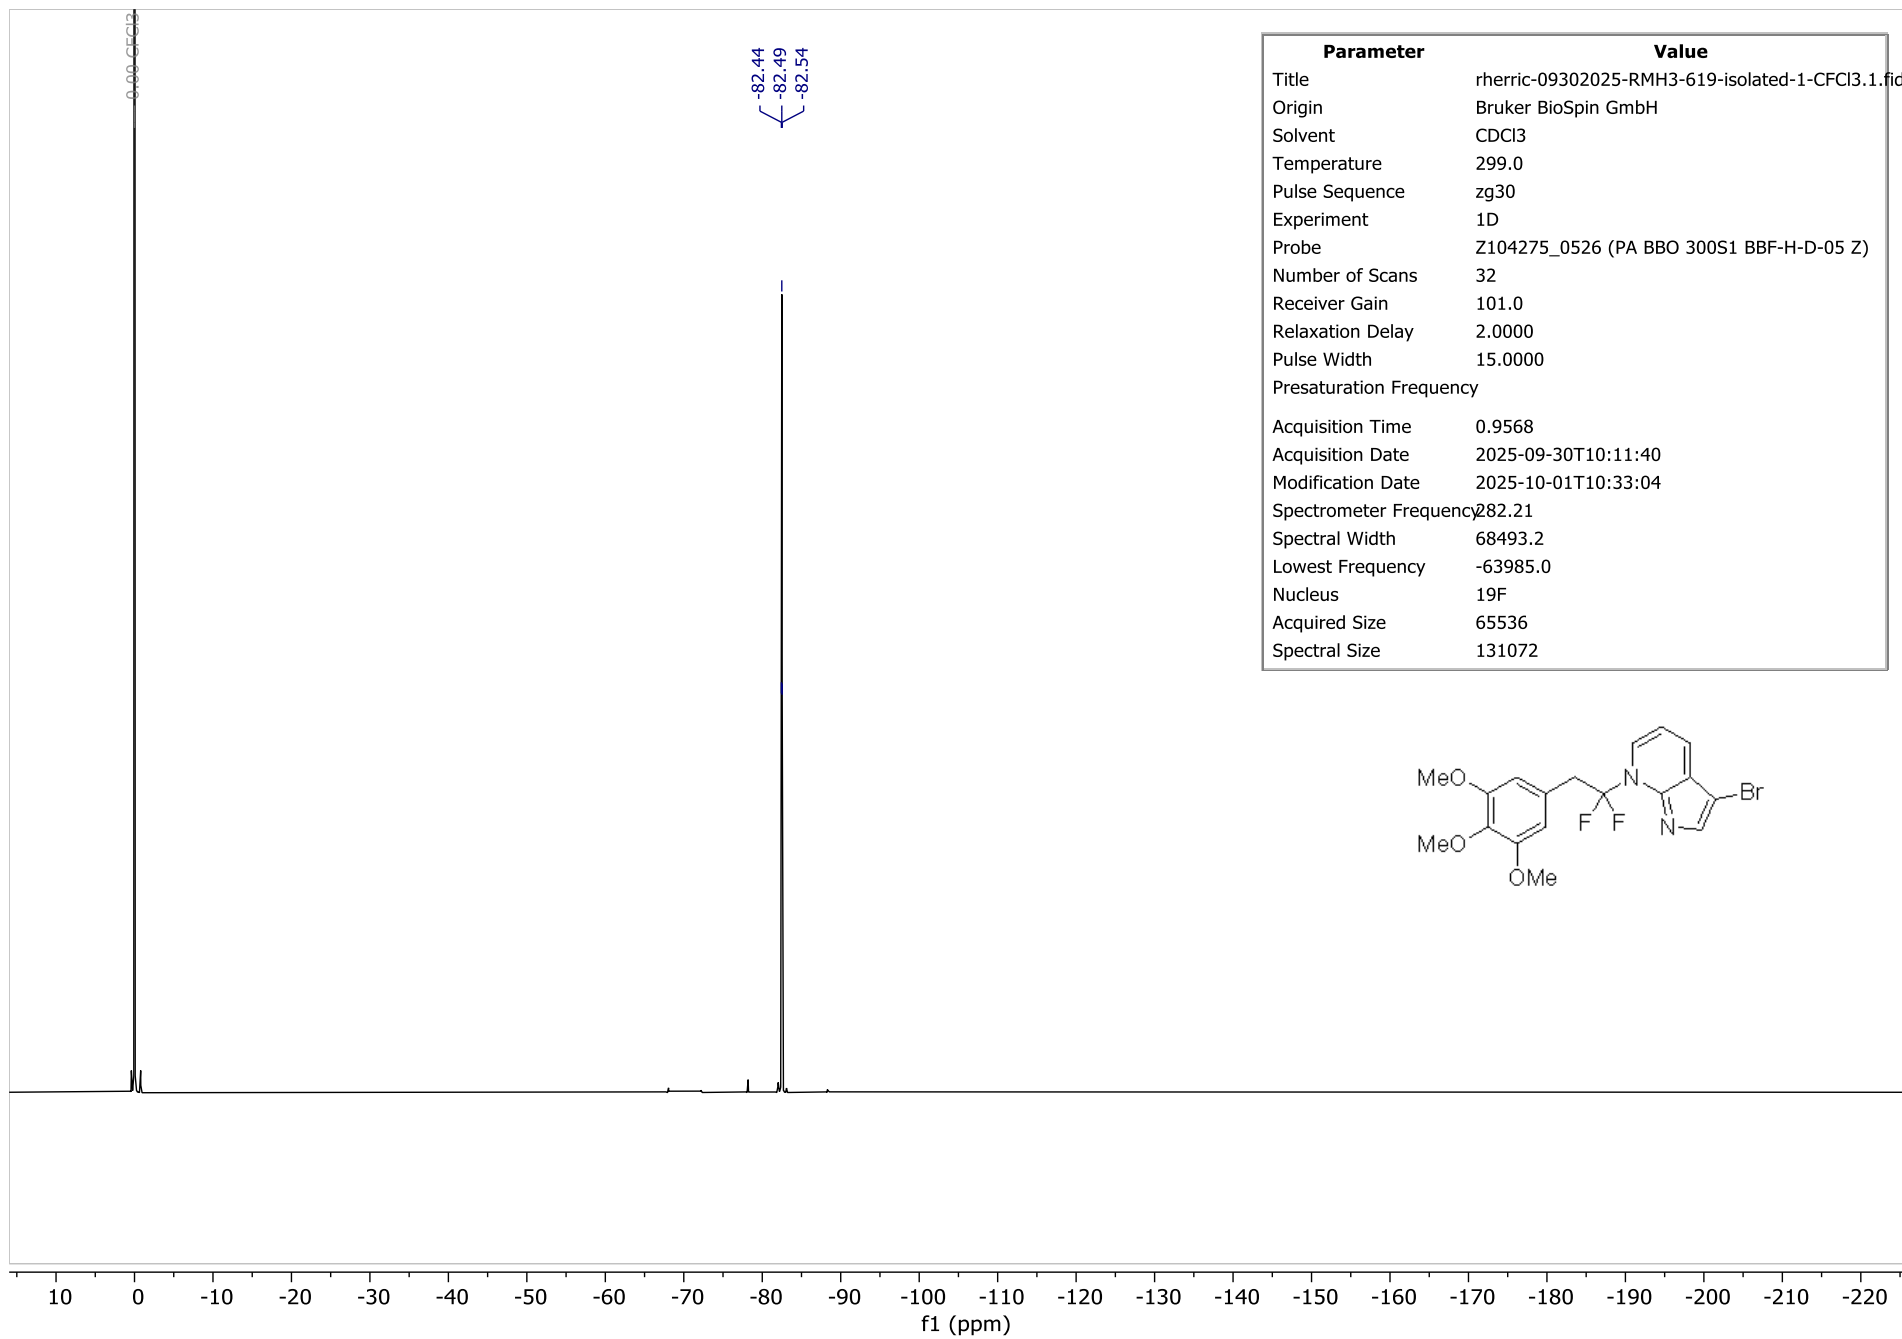

NMR spectra for 4-bromo-1-(1,1-difluoro-2-(3,4,5-trimethoxyphenyl)ethyl)-1H-pyrazole (**11am**)

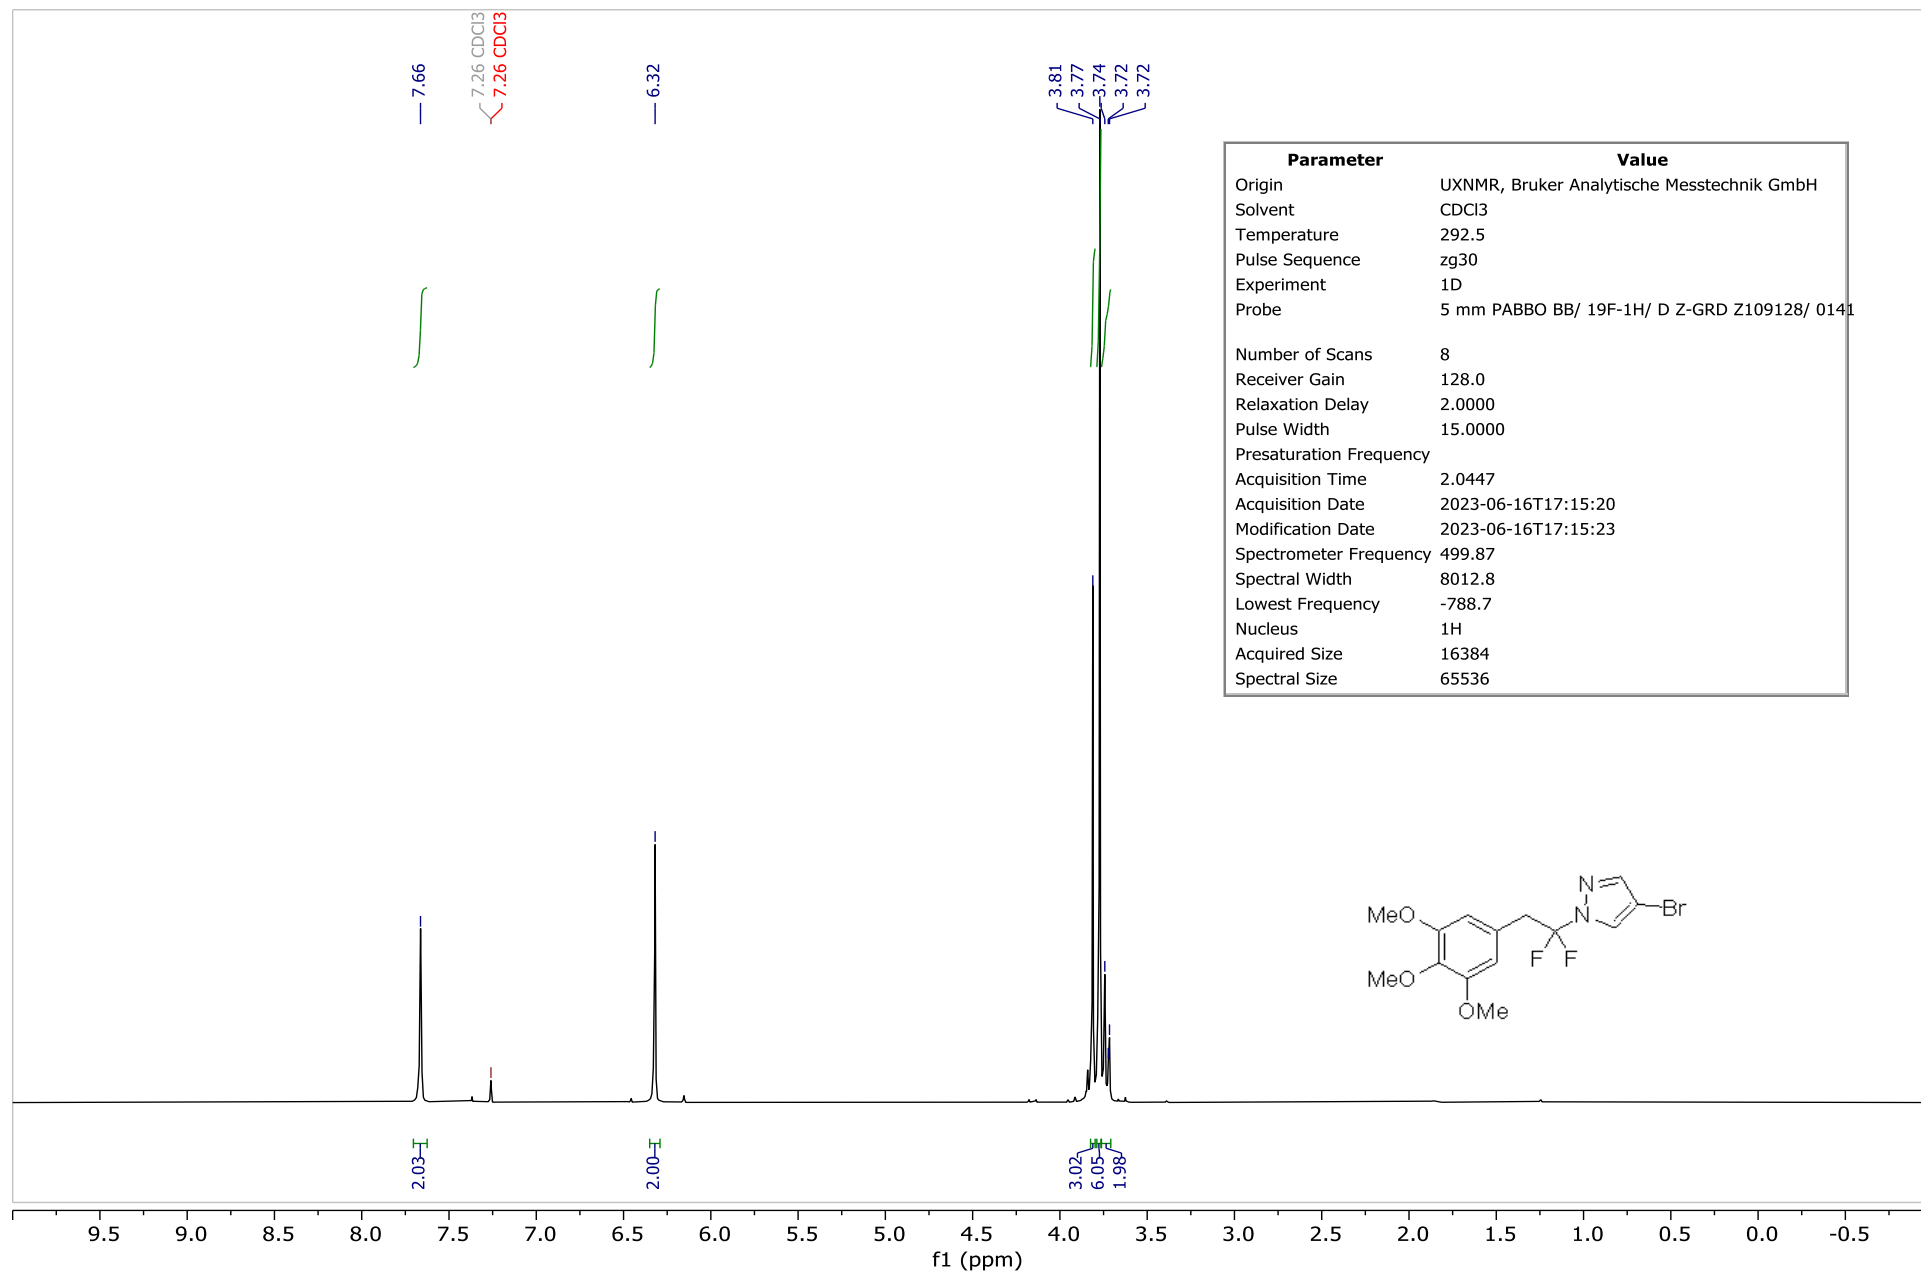



| Parameter               | Value                                        |
|-------------------------|----------------------------------------------|
| Origin                  | UXNMR, Bruker Analytische Messtechnik GmbH   |
| Solvent                 | CDCl <sub>3</sub>                            |
| Temperature             | 293.2                                        |
| Pulse Sequence          | zgpg30                                       |
| Experiment              | 1D                                           |
| Probe                   | 5 mm PABBO BB/ 19F-1H/ D Z-GRD Z109128/ 0141 |
| Number of Scans         | 1572                                         |
| Receiver Gain           | 16384.0                                      |
| Relaxation Delay        | 0.1500                                       |
| Pulse Width             | 12.0000                                      |
| Presaturation Frequency |                                              |
| Acquisition Time        | 0.5456                                       |
| Acquisition Date        | 2023-06-16T17:37:48                          |
| Modification Date       | 2023-06-16T17:37:51                          |
| Spectrometer Frequency  | 125.71                                       |
| Spectral Width          | 30030.0                                      |
| Lowest Frequency        | -1259.5                                      |
| Nucleus                 | <sup>13</sup> C                              |
| Acquired Size           | 16384                                        |
| Spectral Size           | 65536                                        |

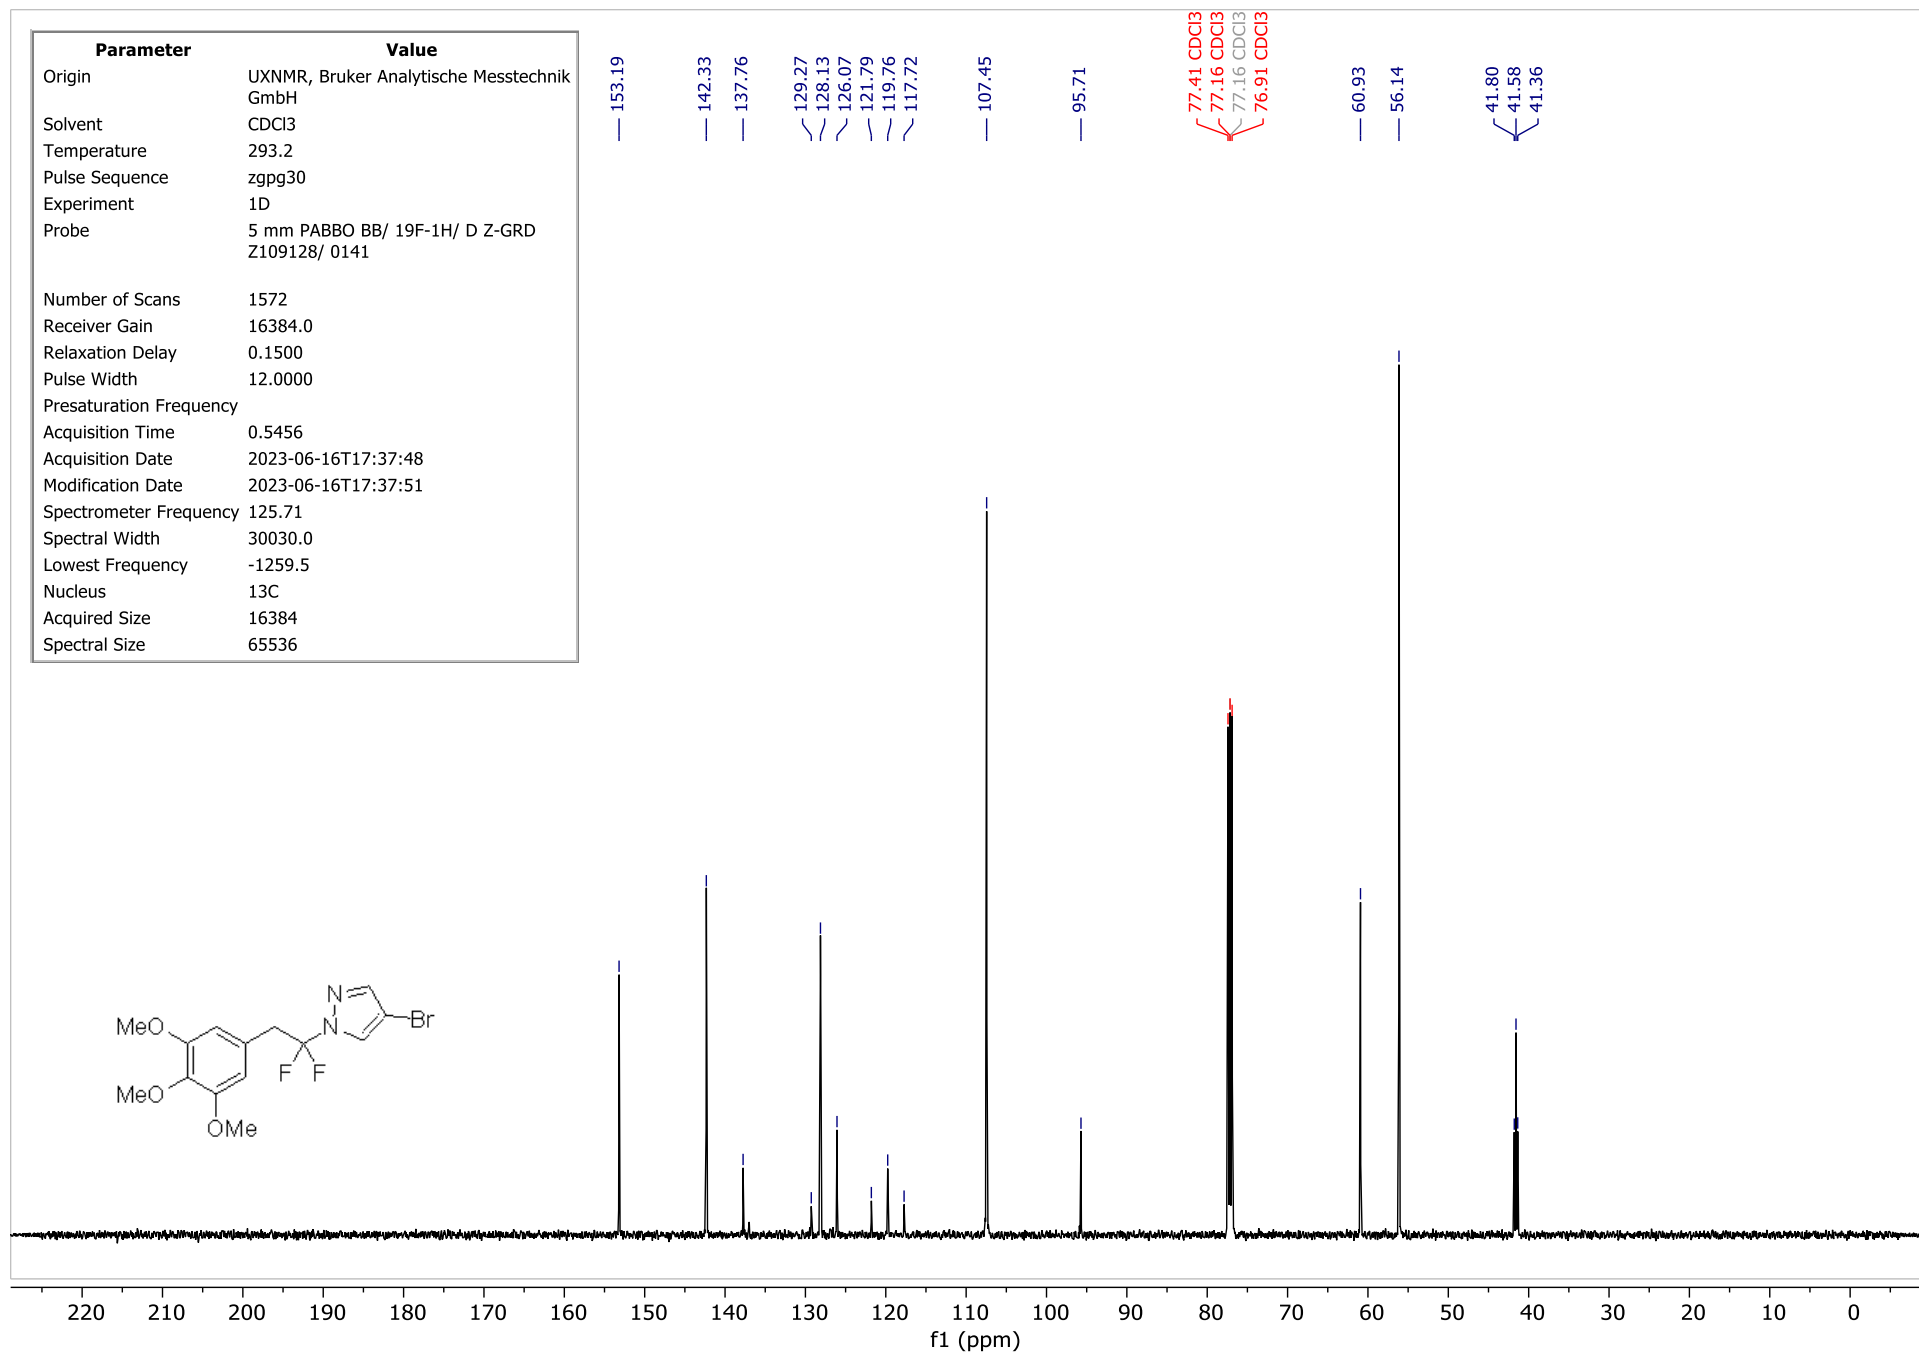

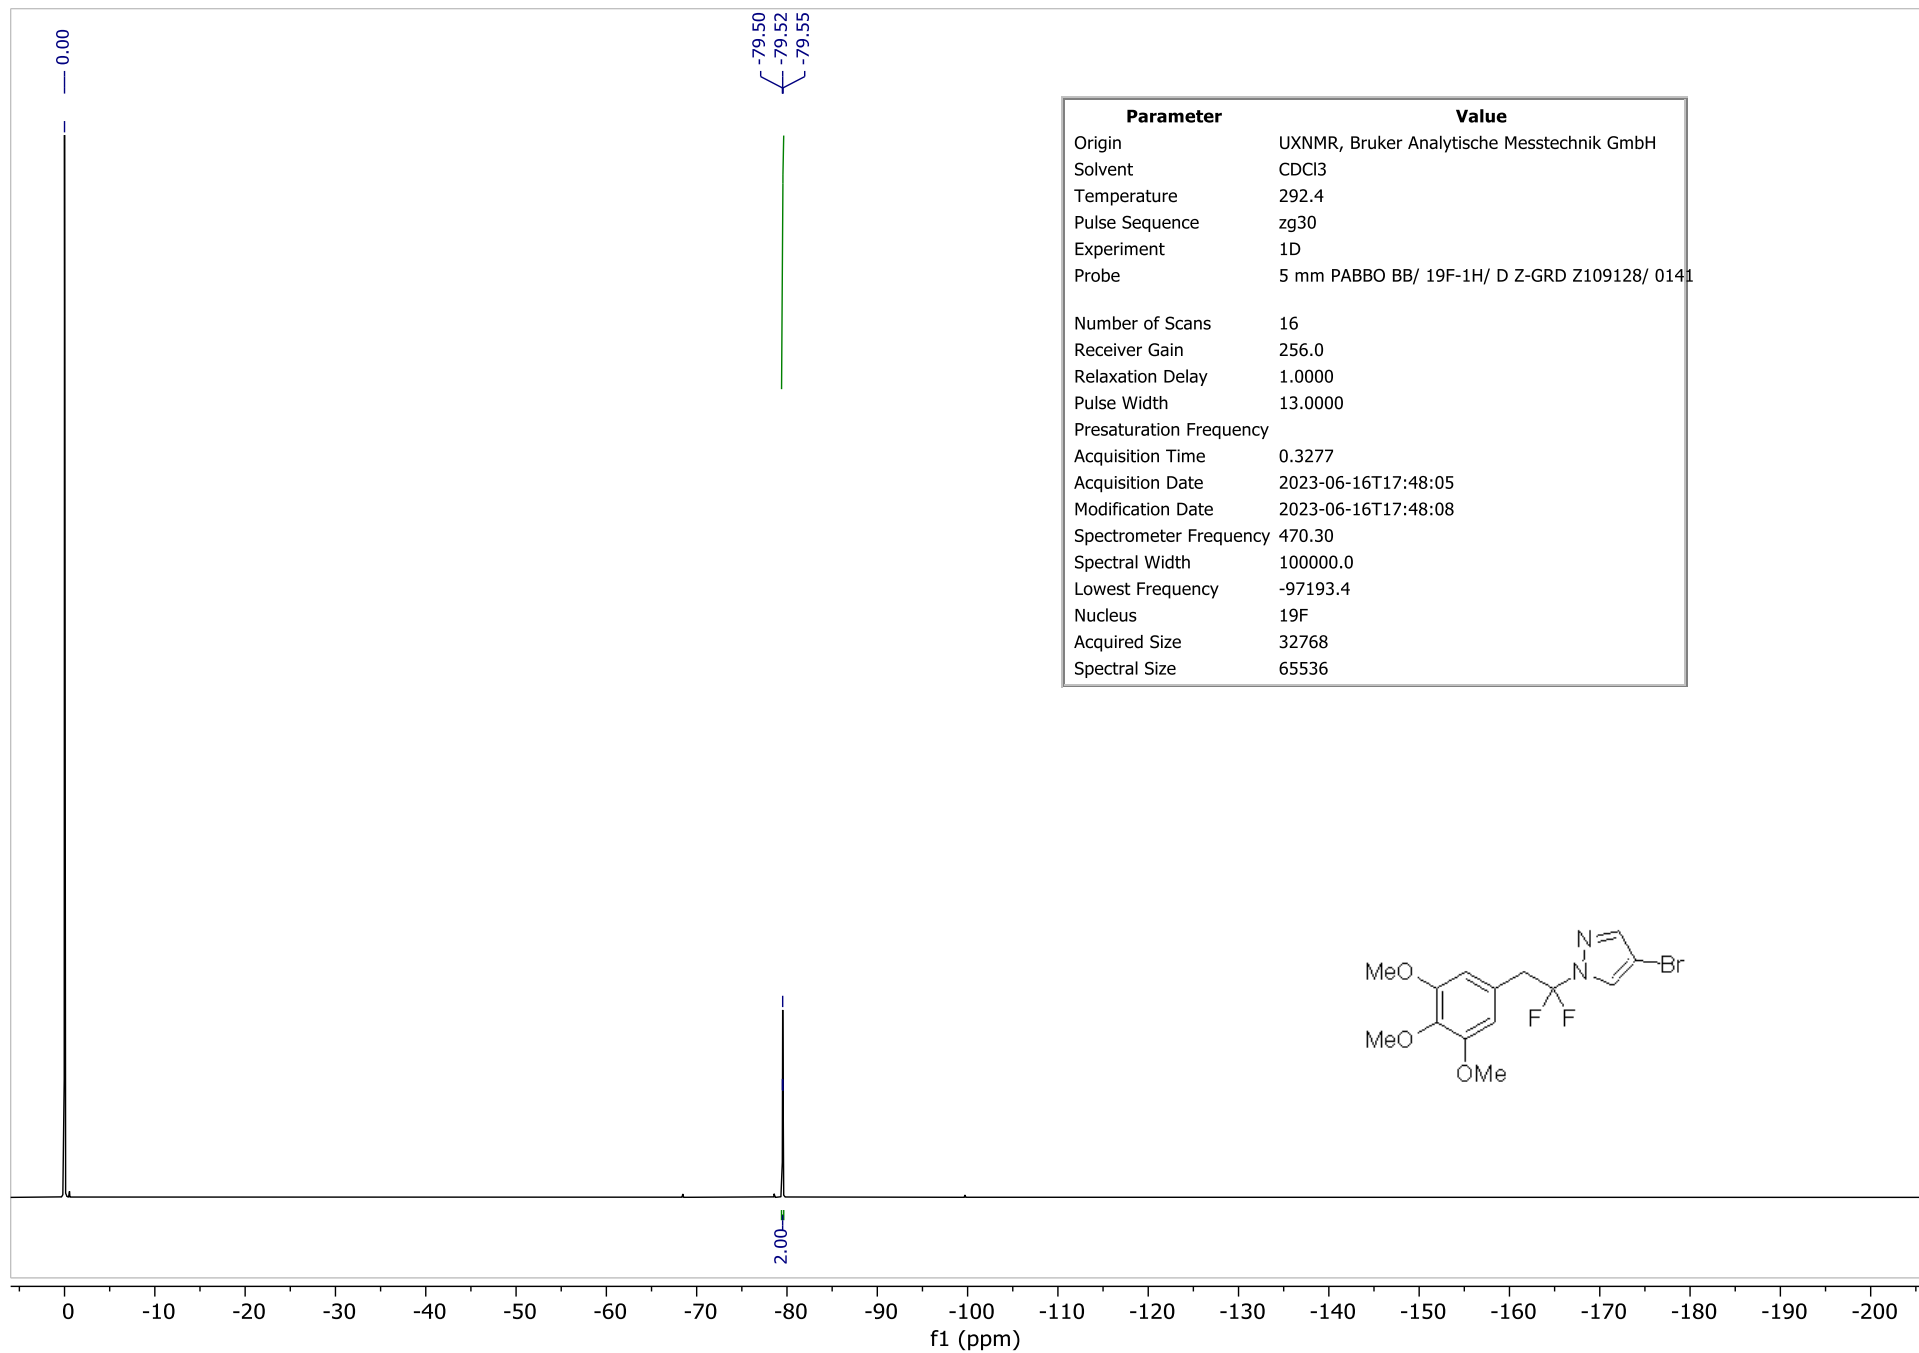

| Parameter               | Value                                        |
|-------------------------|----------------------------------------------|
| Origin                  | UXNMR, Bruker Analytische Messtechnik GmbH   |
| Solvent                 | CDCl3                                        |
| Temperature             | 292.4                                        |
| Pulse Sequence          | zg30                                         |
| Experiment              | 1D                                           |
| Probe                   | 5 mm PABBO BB/ 19F-1H/ D Z-GRD Z109128/ 0141 |
| Number of Scans         | 16                                           |
| Receiver Gain           | 256.0                                        |
| Relaxation Delay        | 1.0000                                       |
| Pulse Width             | 13.0000                                      |
| Presaturation Frequency |                                              |
| Acquisition Time        | 0.3277                                       |
| Acquisition Date        | 2023-06-16T17:48:05                          |
| Modification Date       | 2023-06-16T17:48:08                          |
| Spectrometer Frequency  | 470.30                                       |
| Spectral Width          | 100000.0                                     |
| Lowest Frequency        | -97193.4                                     |
| Nucleus                 | 19F                                          |
| Acquired Size           | 32768                                        |
| Spectral Size           | 65536                                        |

NMR spectra for 1-(1,1-difluoro-2-(3,4,5-trimethoxyphenyl)ethyl)-4-iodo-1*H*-pyrazole (**11an**)

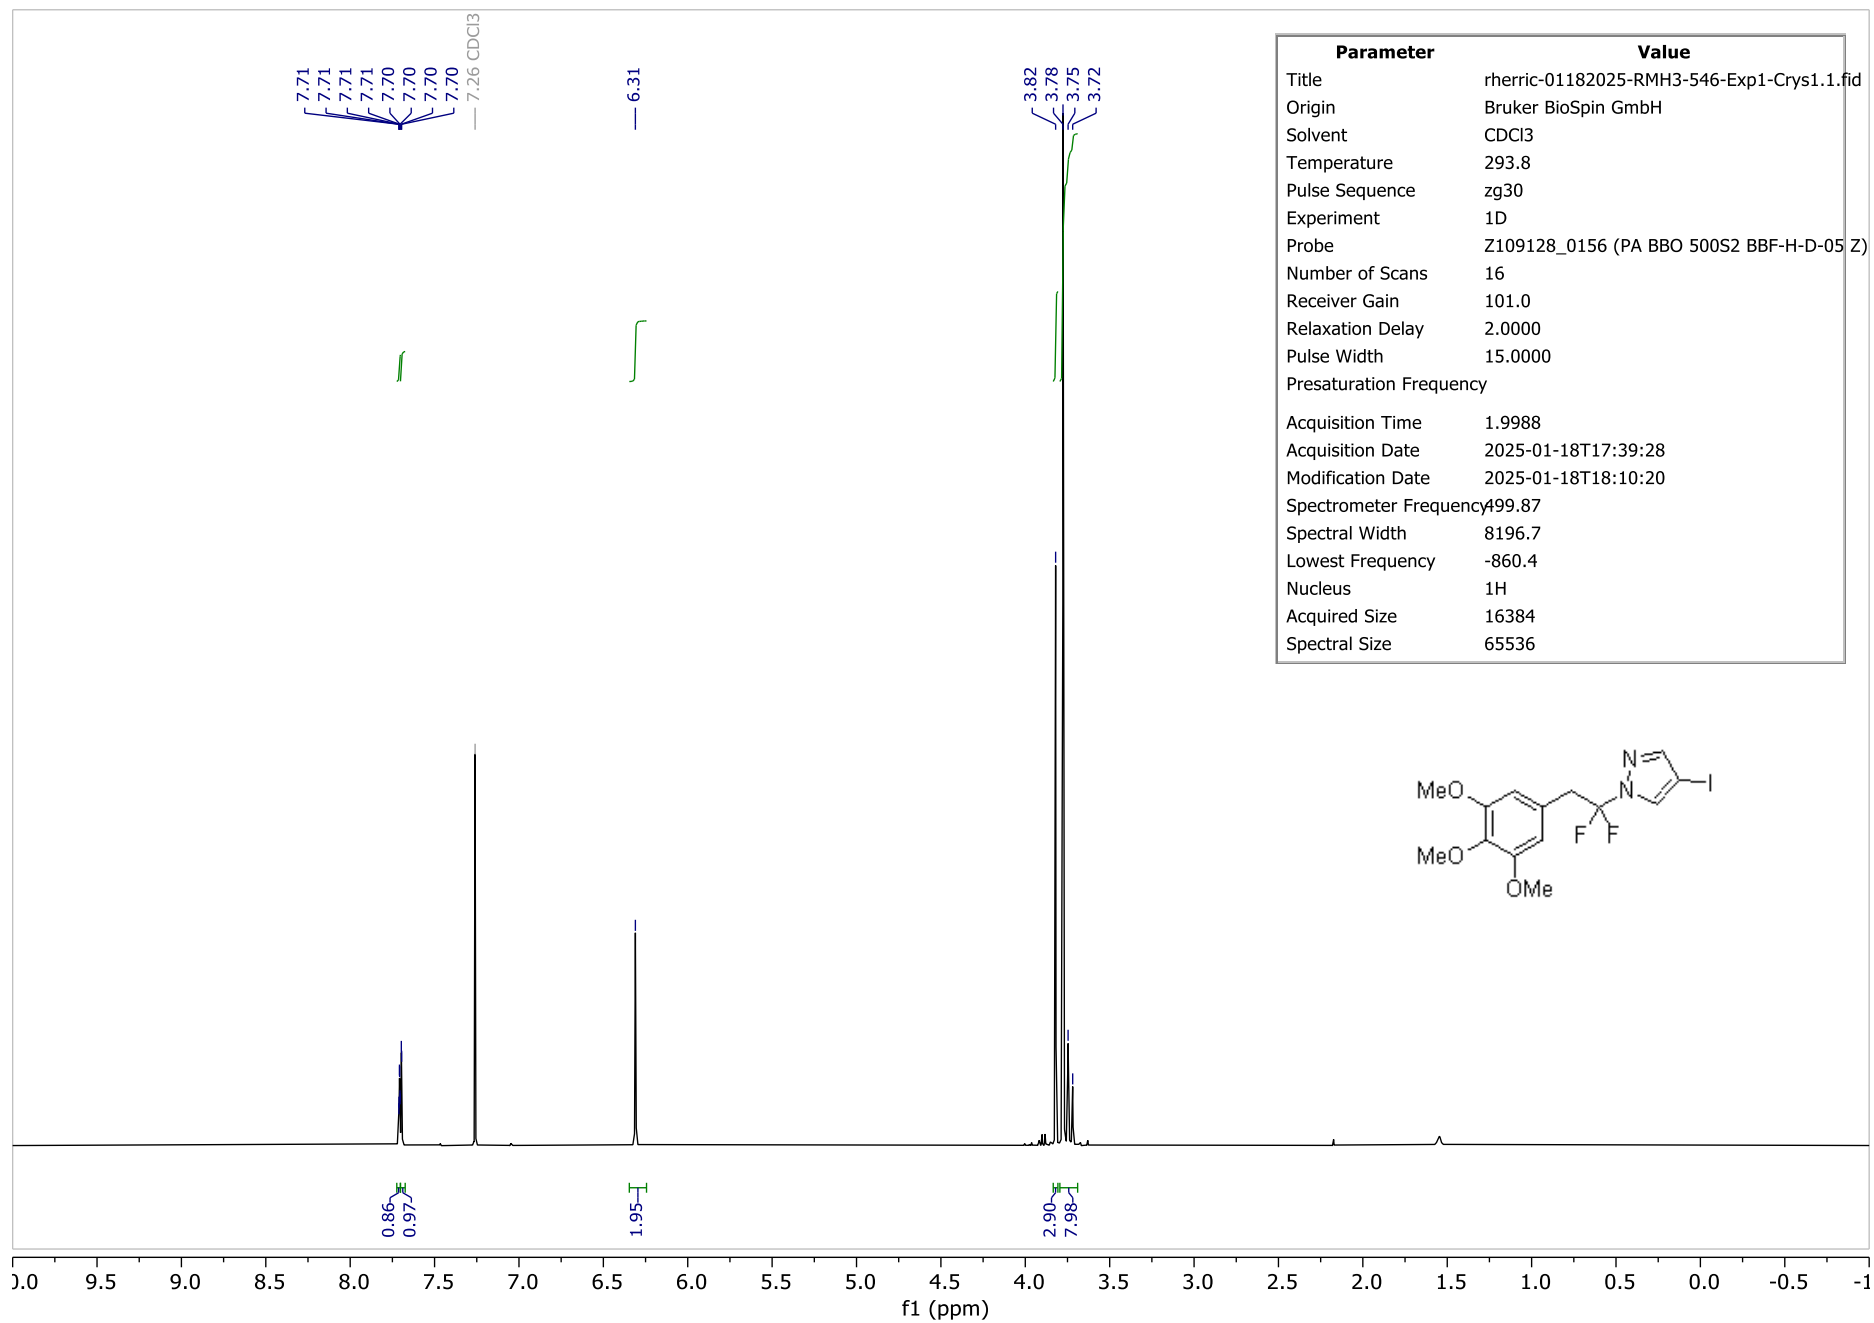

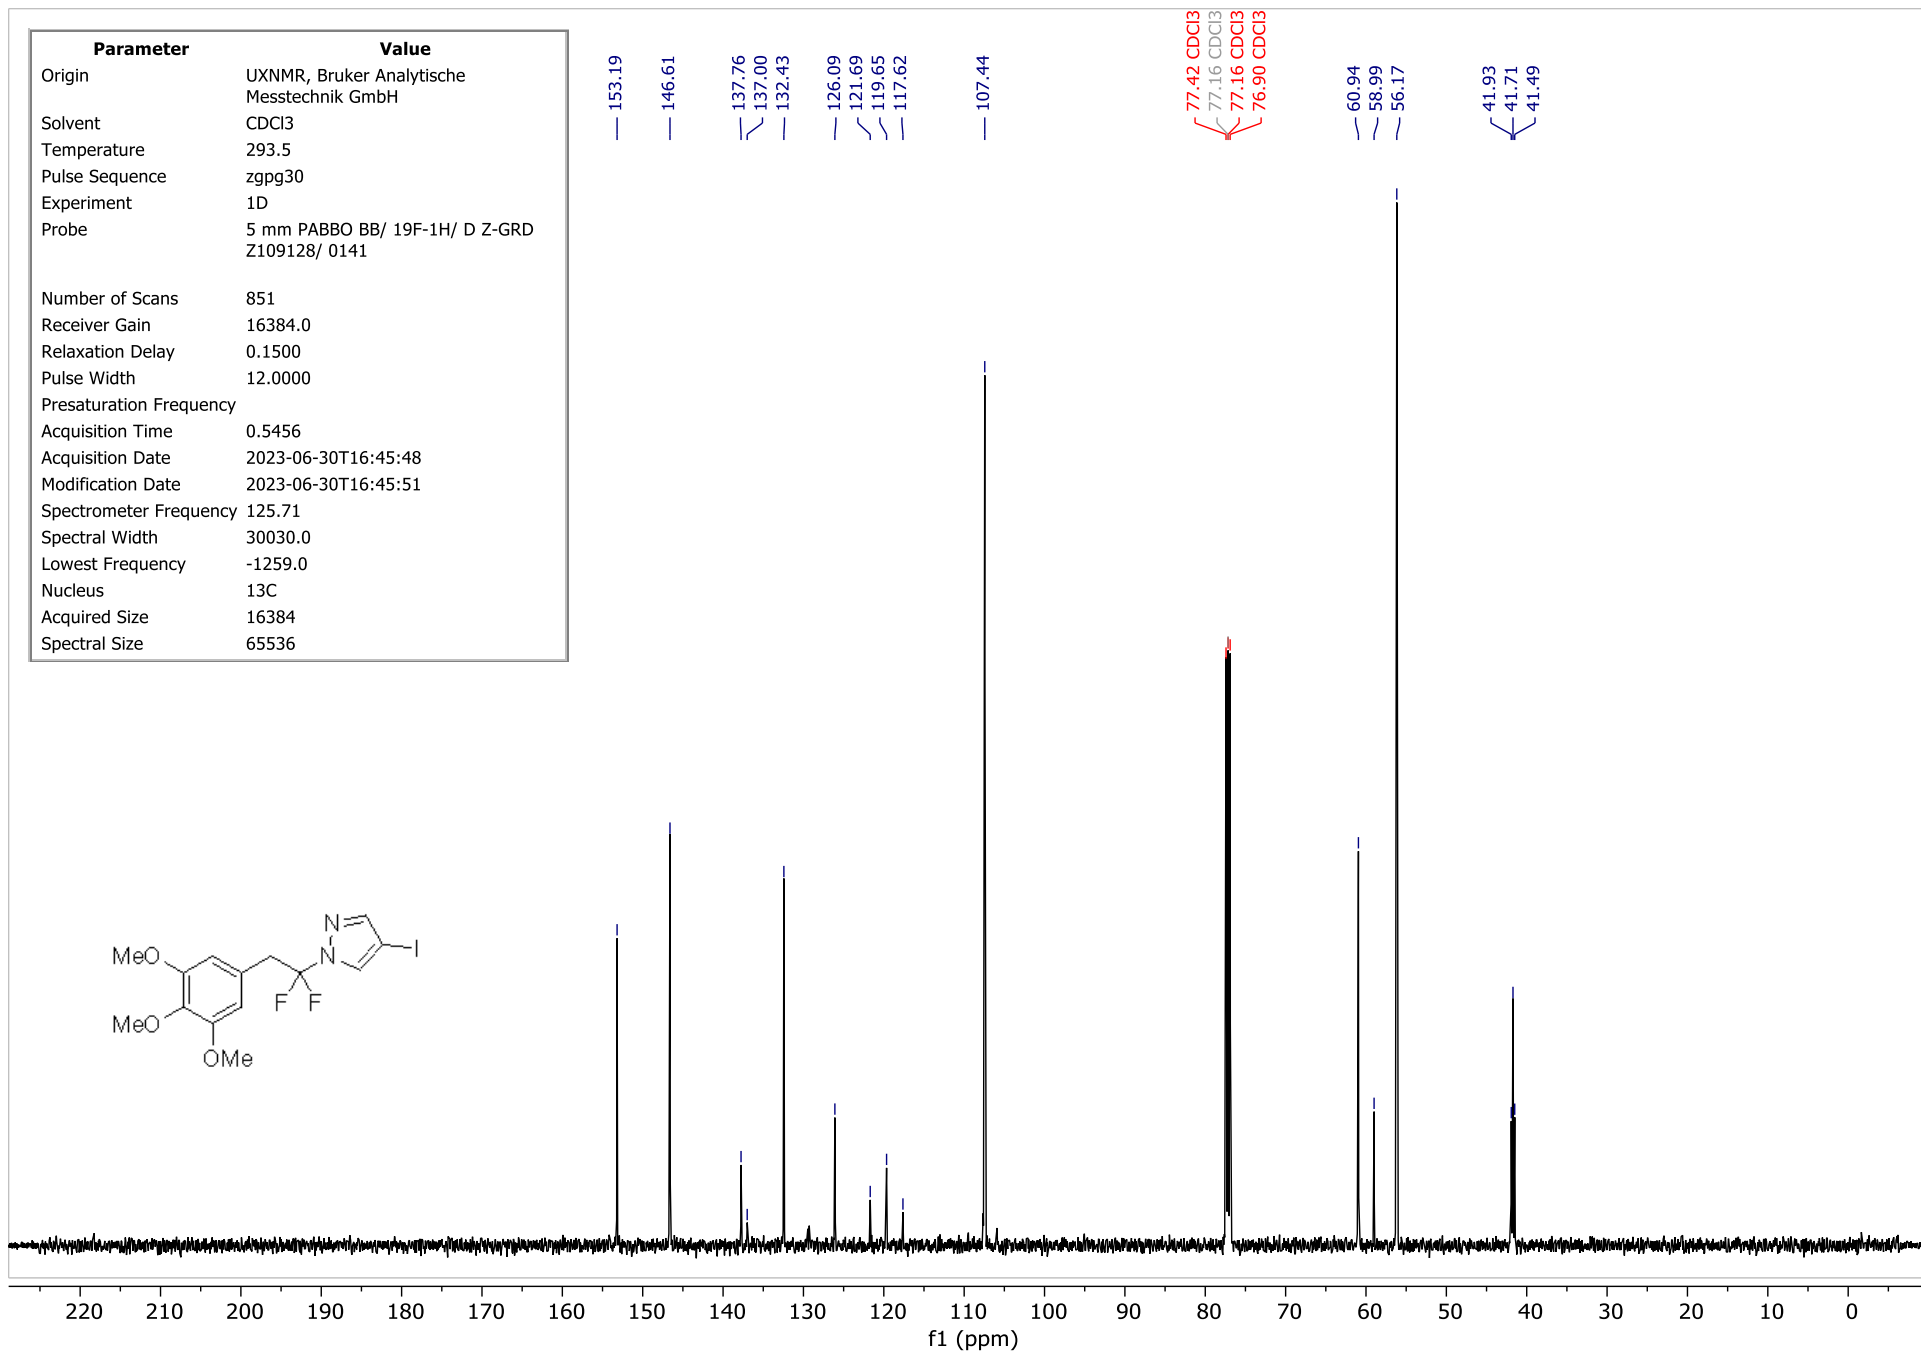

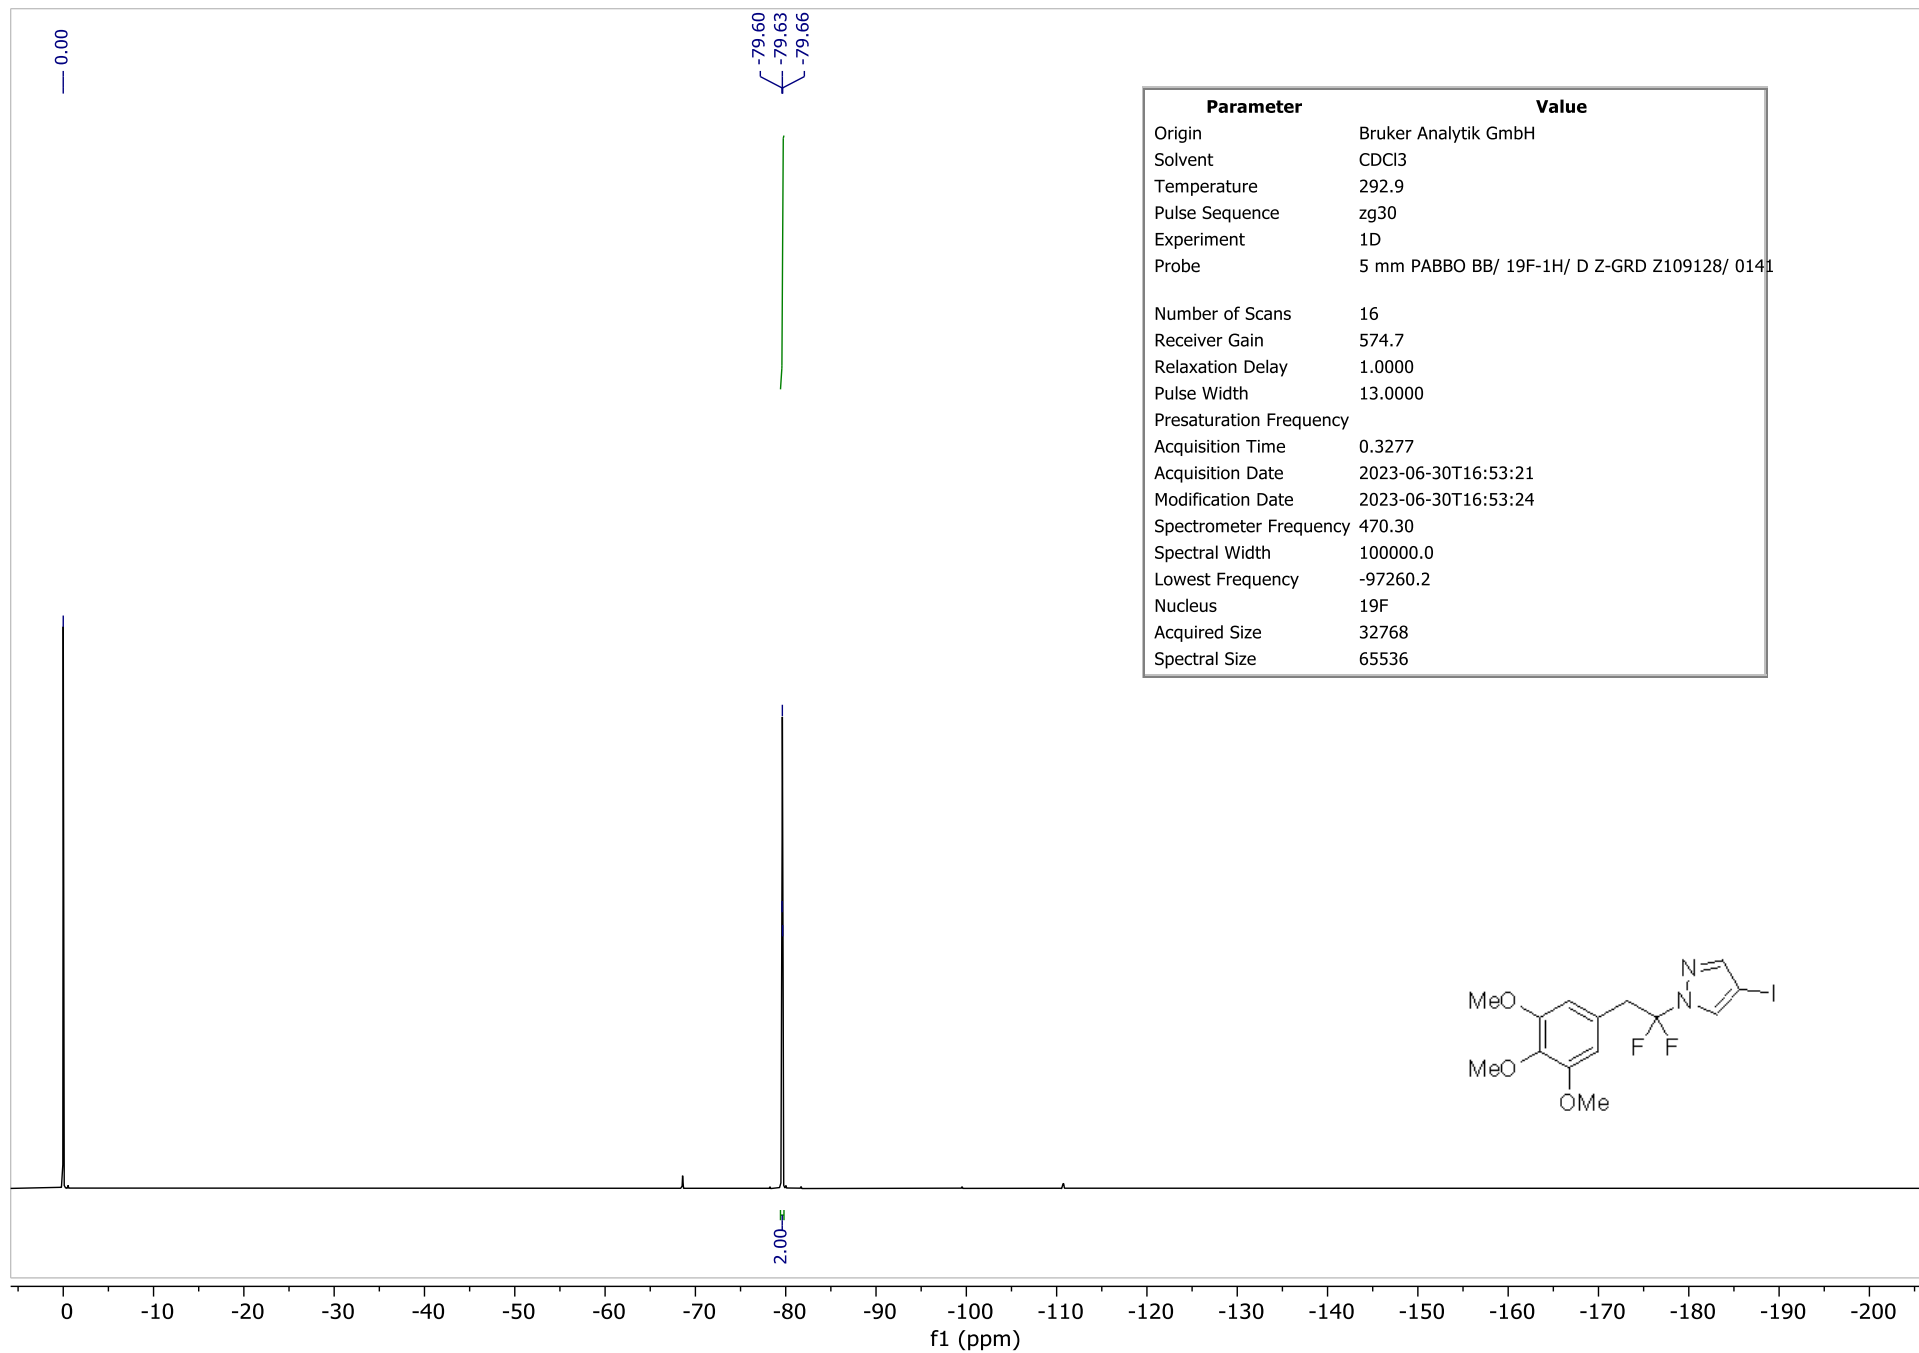

NMR spectra for ethyl 1-(1,1-difluoro-2-(3,4,5-trimethoxyphenyl)ethyl)-1H-pyrazole-4-carboxylate (**11ao**)

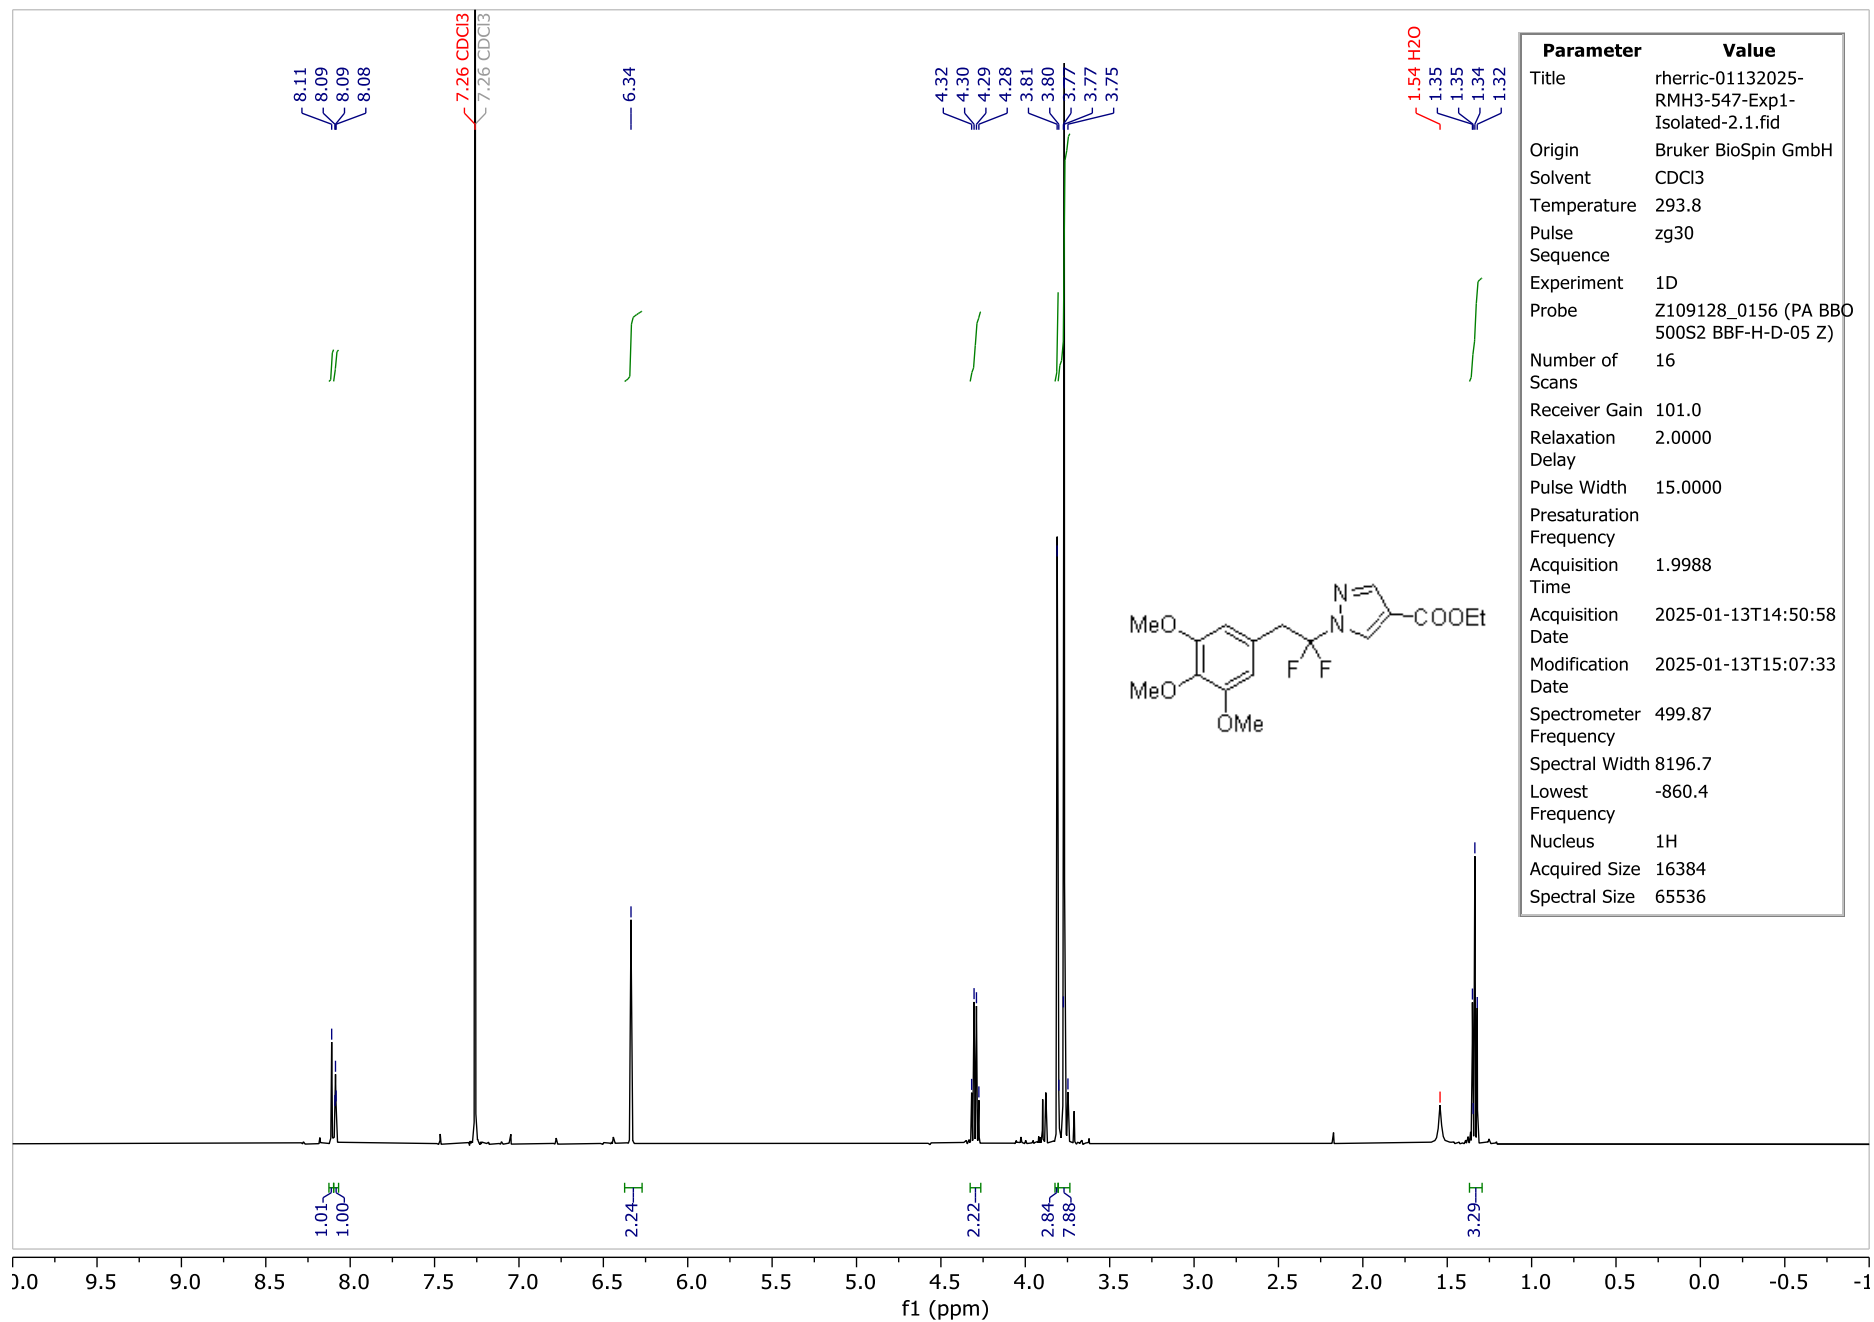

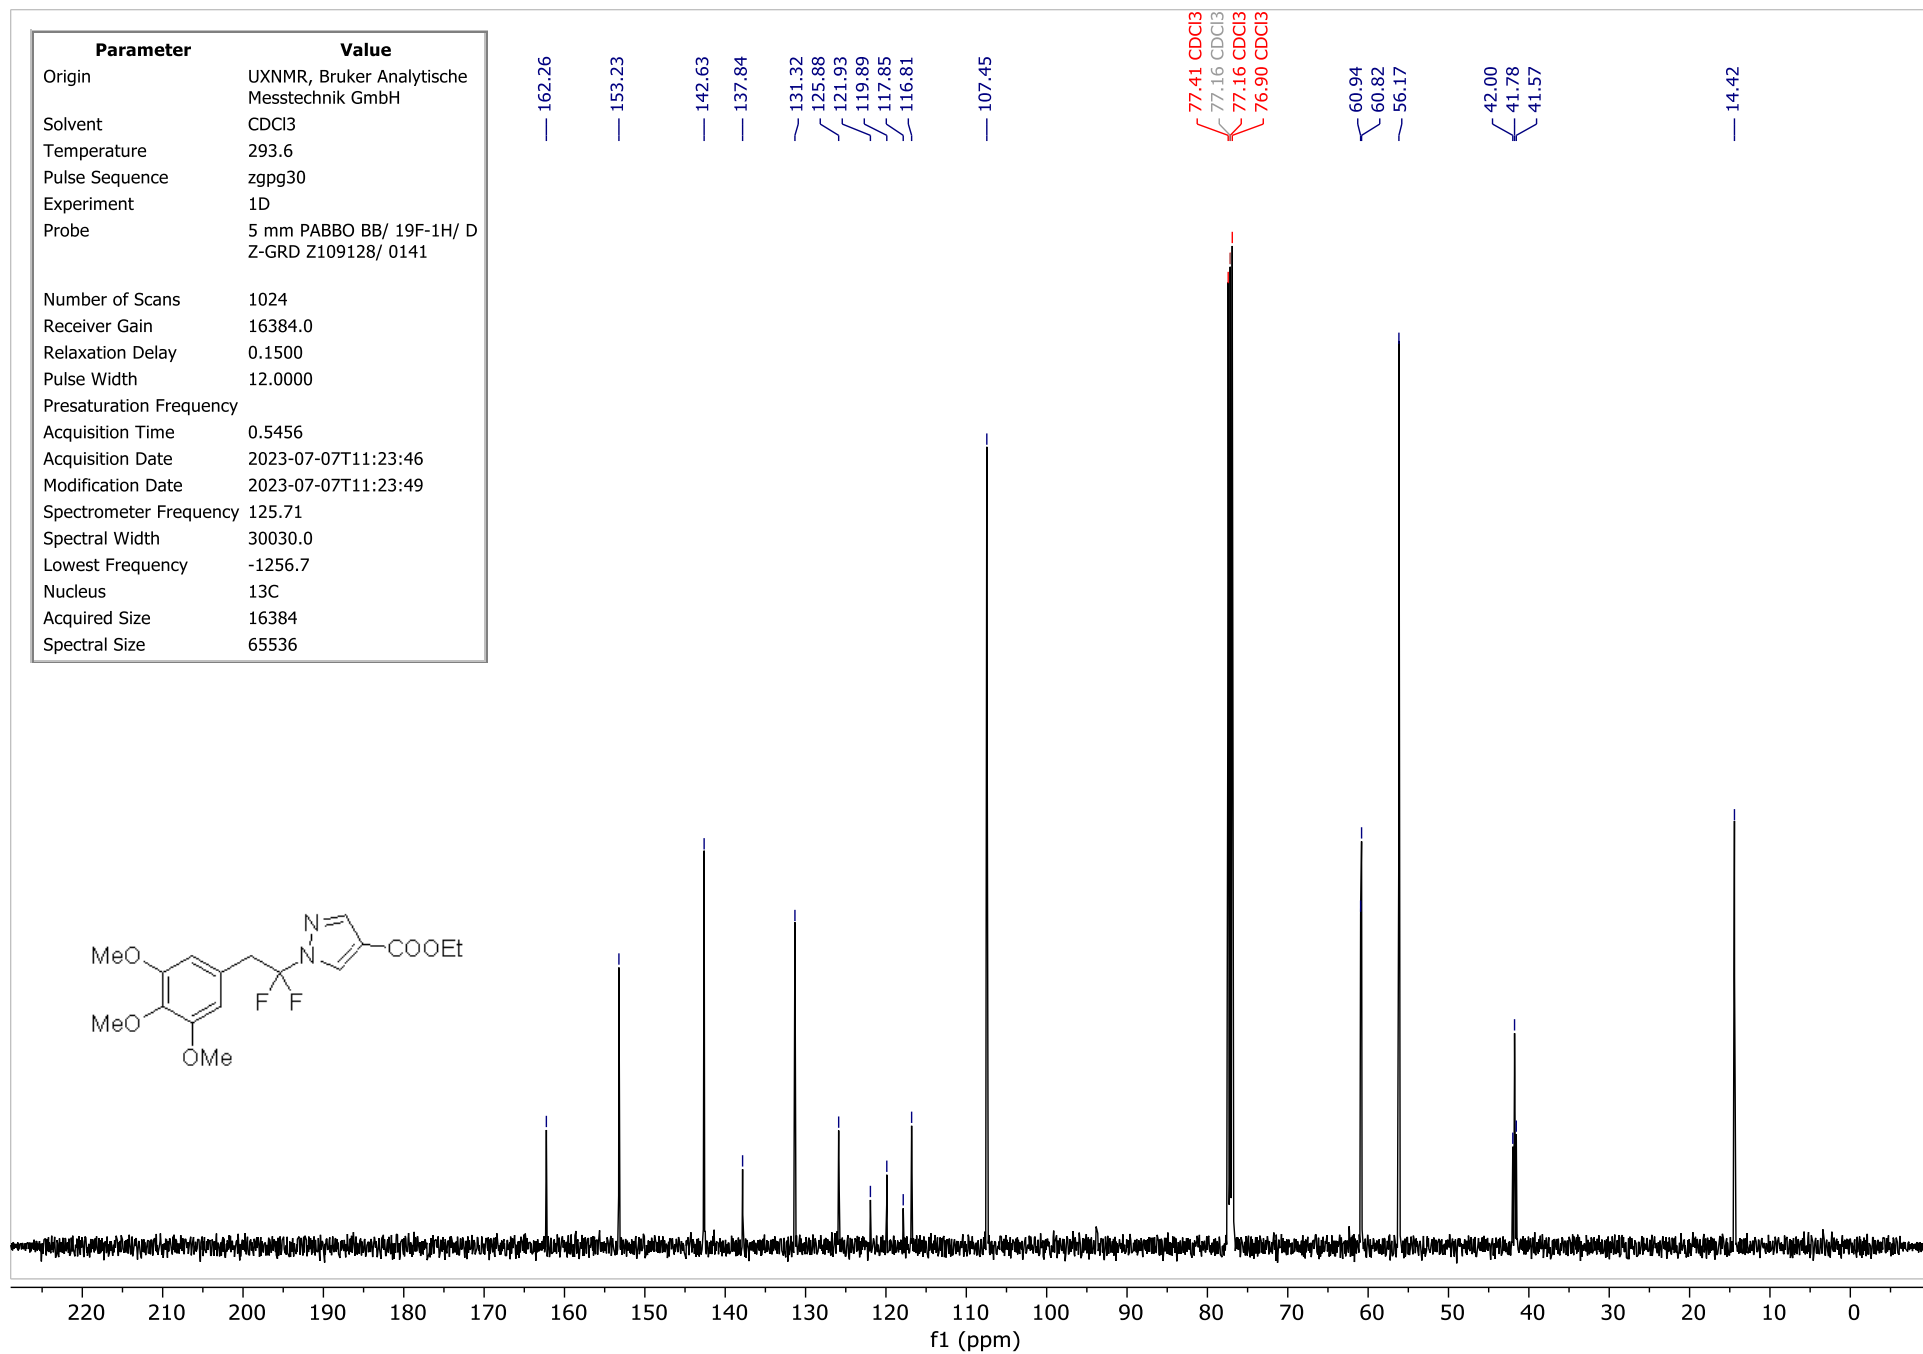

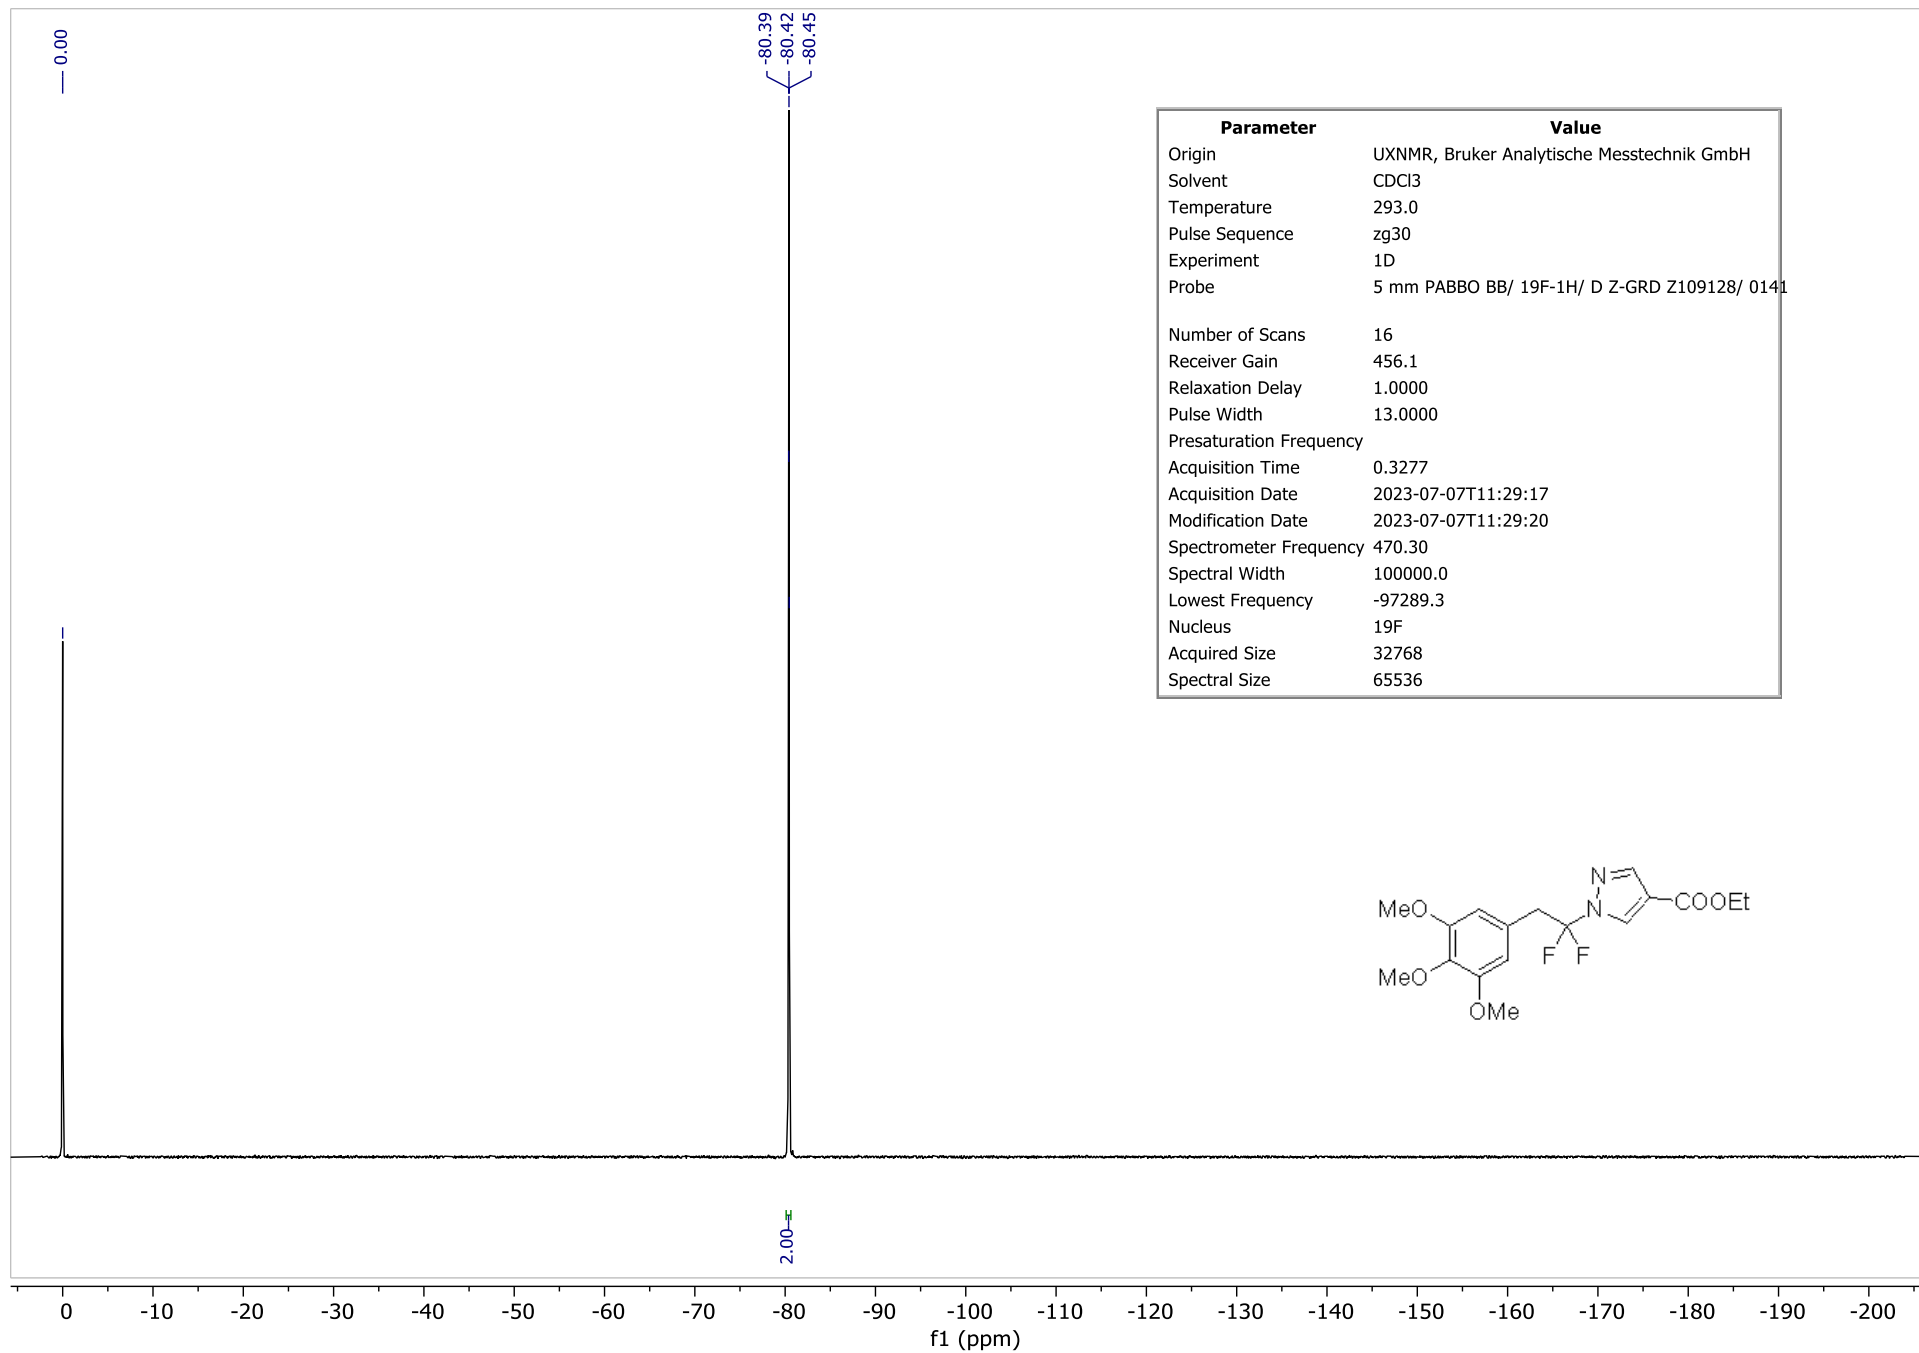



NMR spectra for 1-(1,1-difluoro-2-(3,4,5-trimethoxyphenyl)ethyl)-3,5-dimethyl-1*H*-pyrazole (**11ap**)

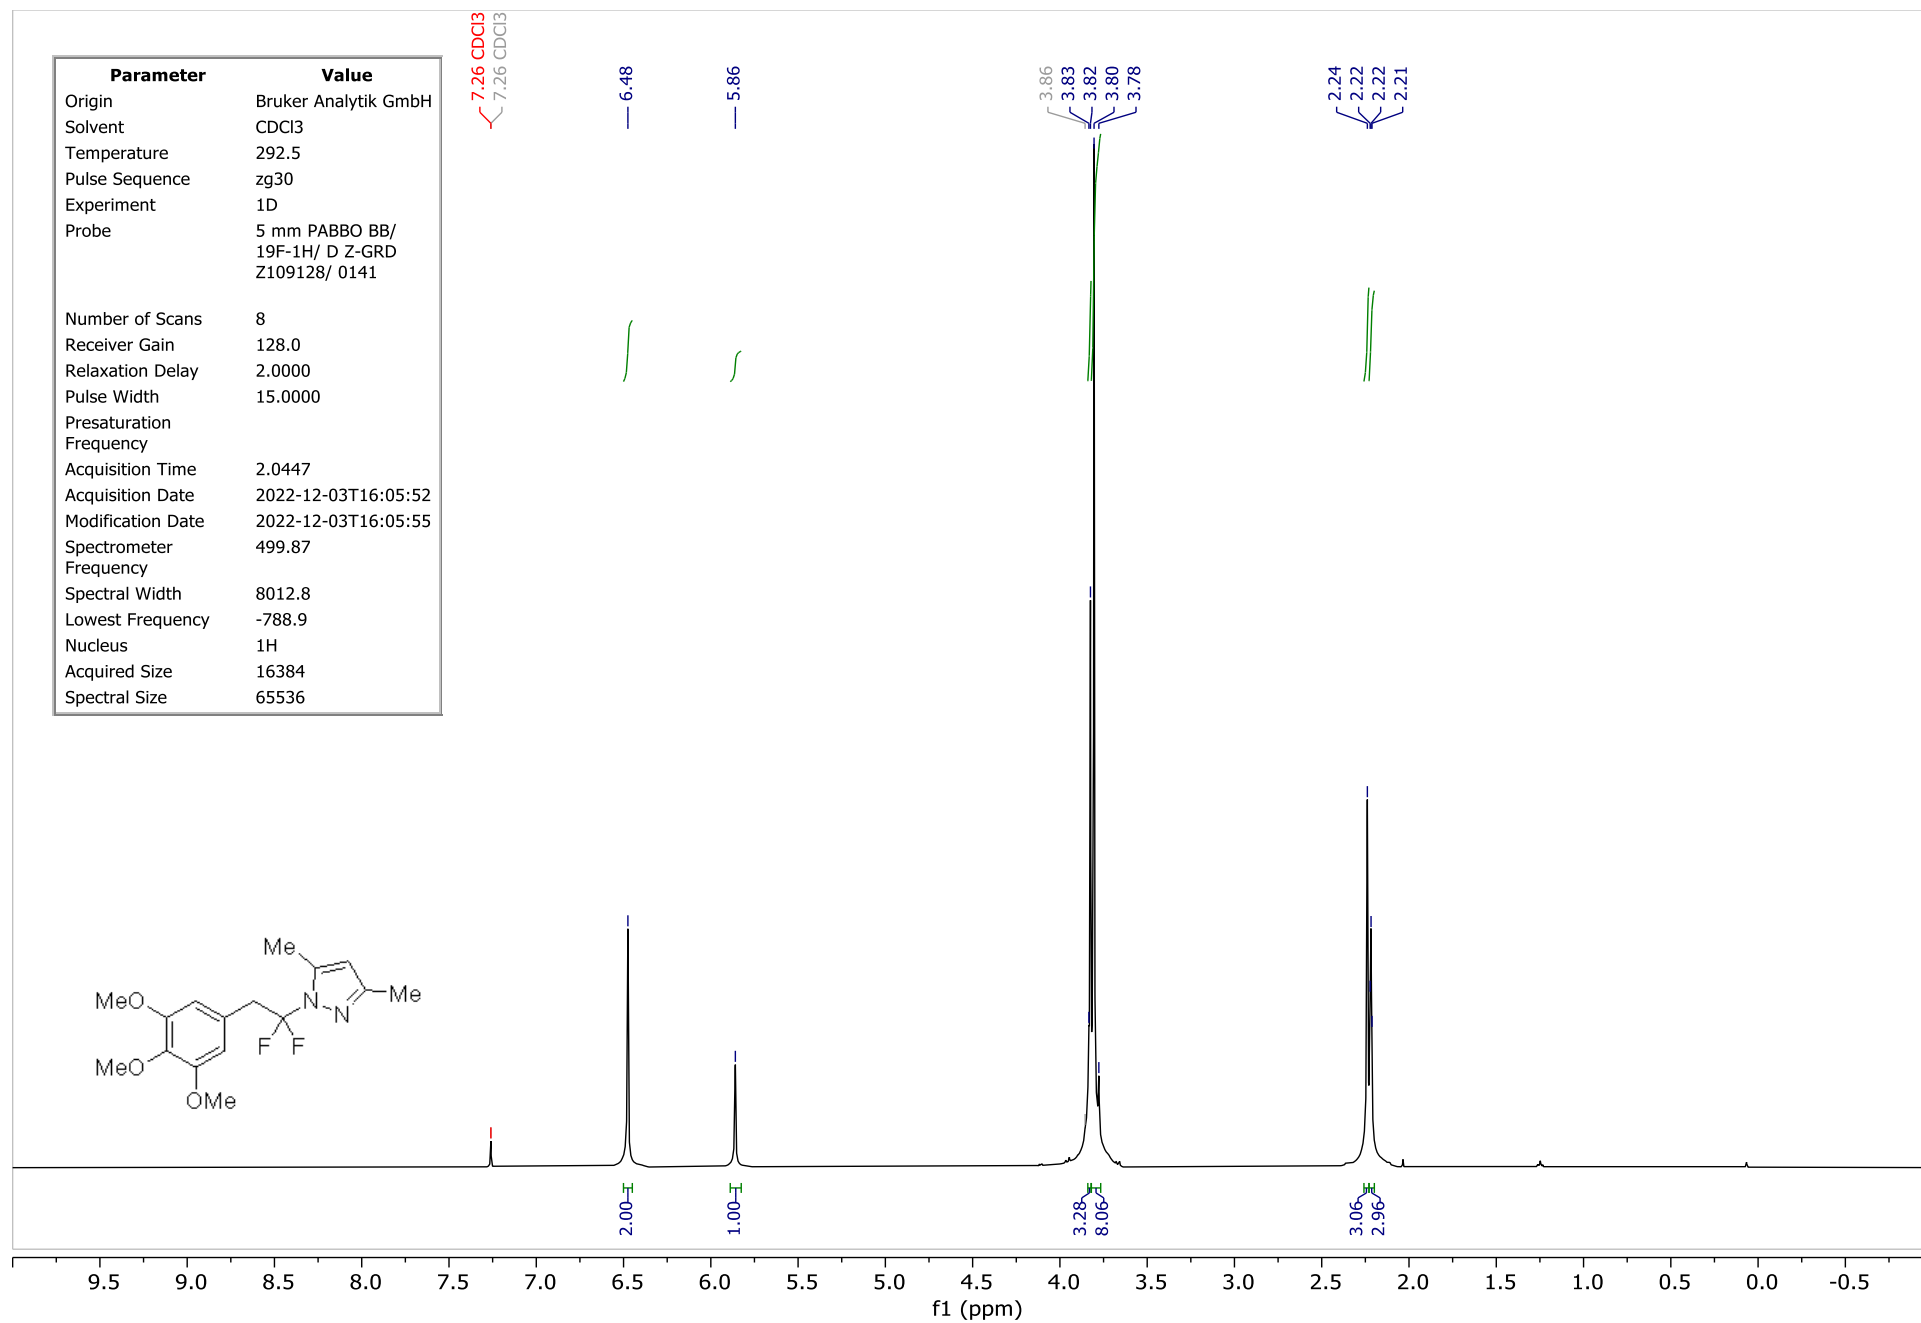

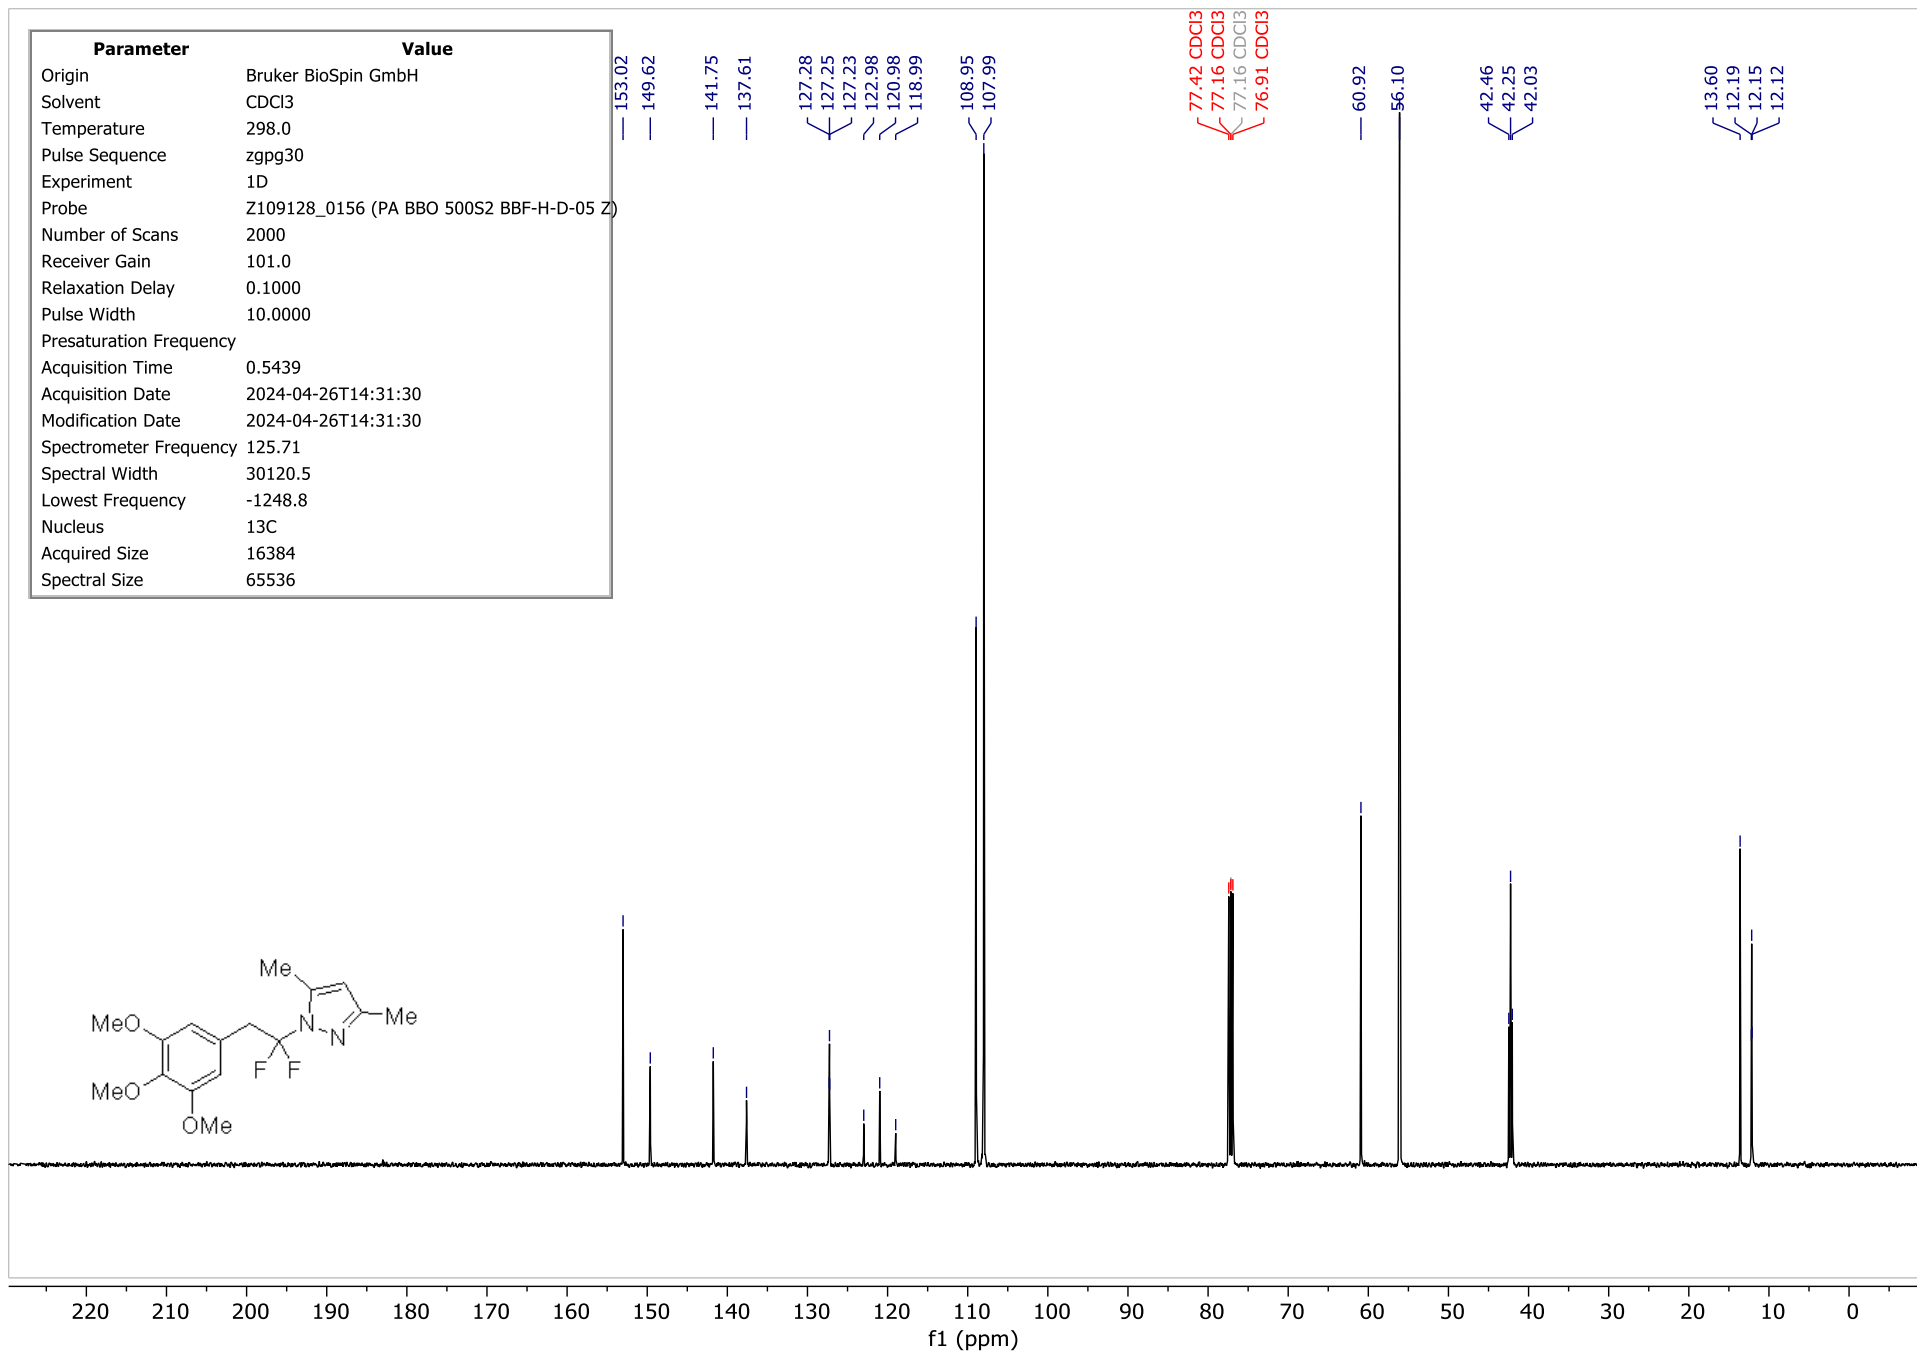

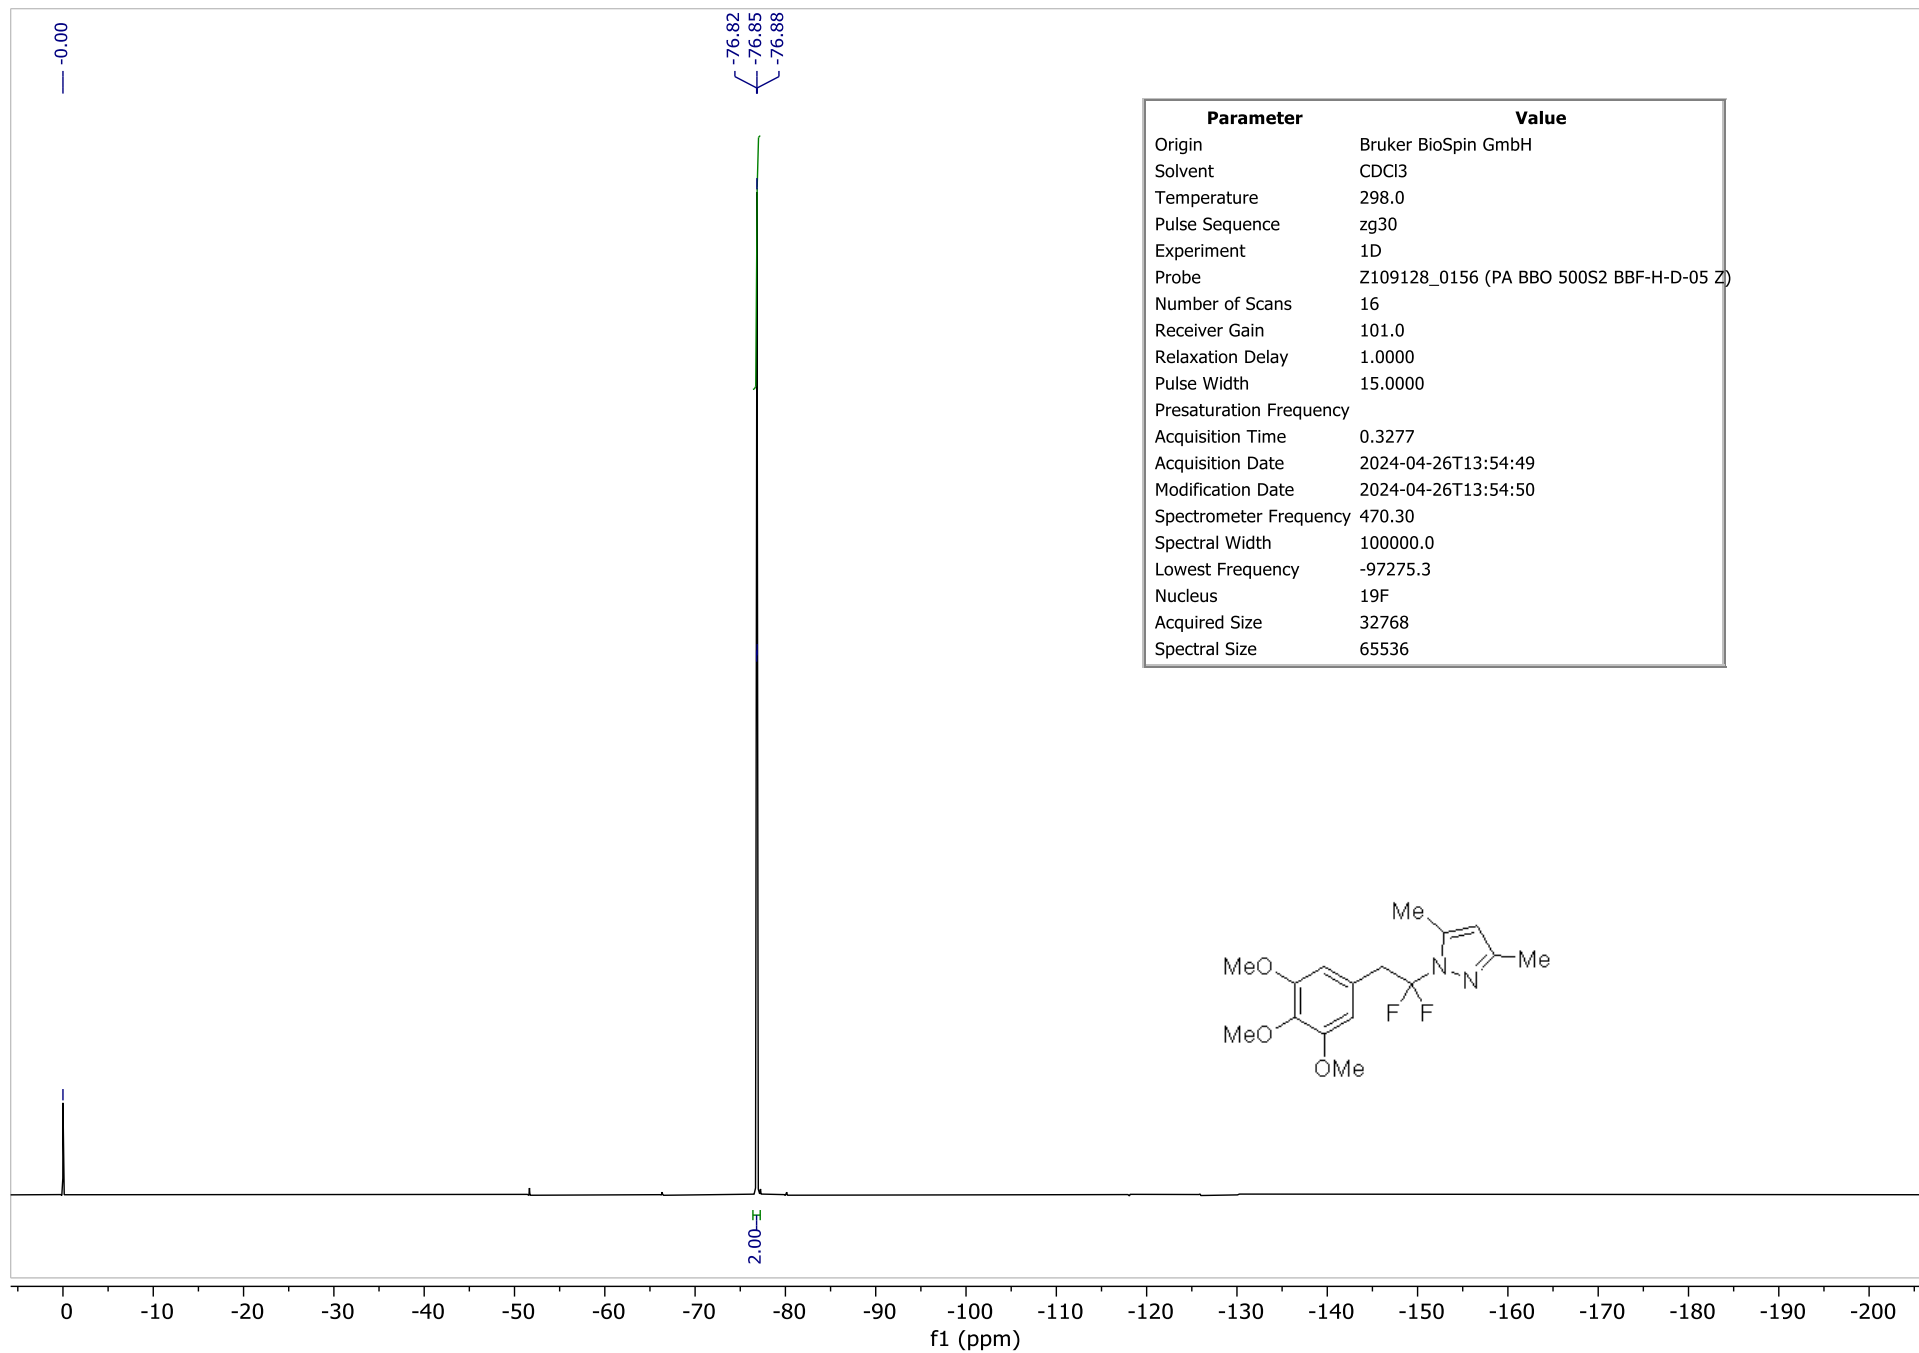

NMR spectra for 1-(1,1-Difluoro-2-(3,4,5-trimethoxyphenyl)ethyl)-3,5-diphenyl-1H-pyrazole (**11aq**)

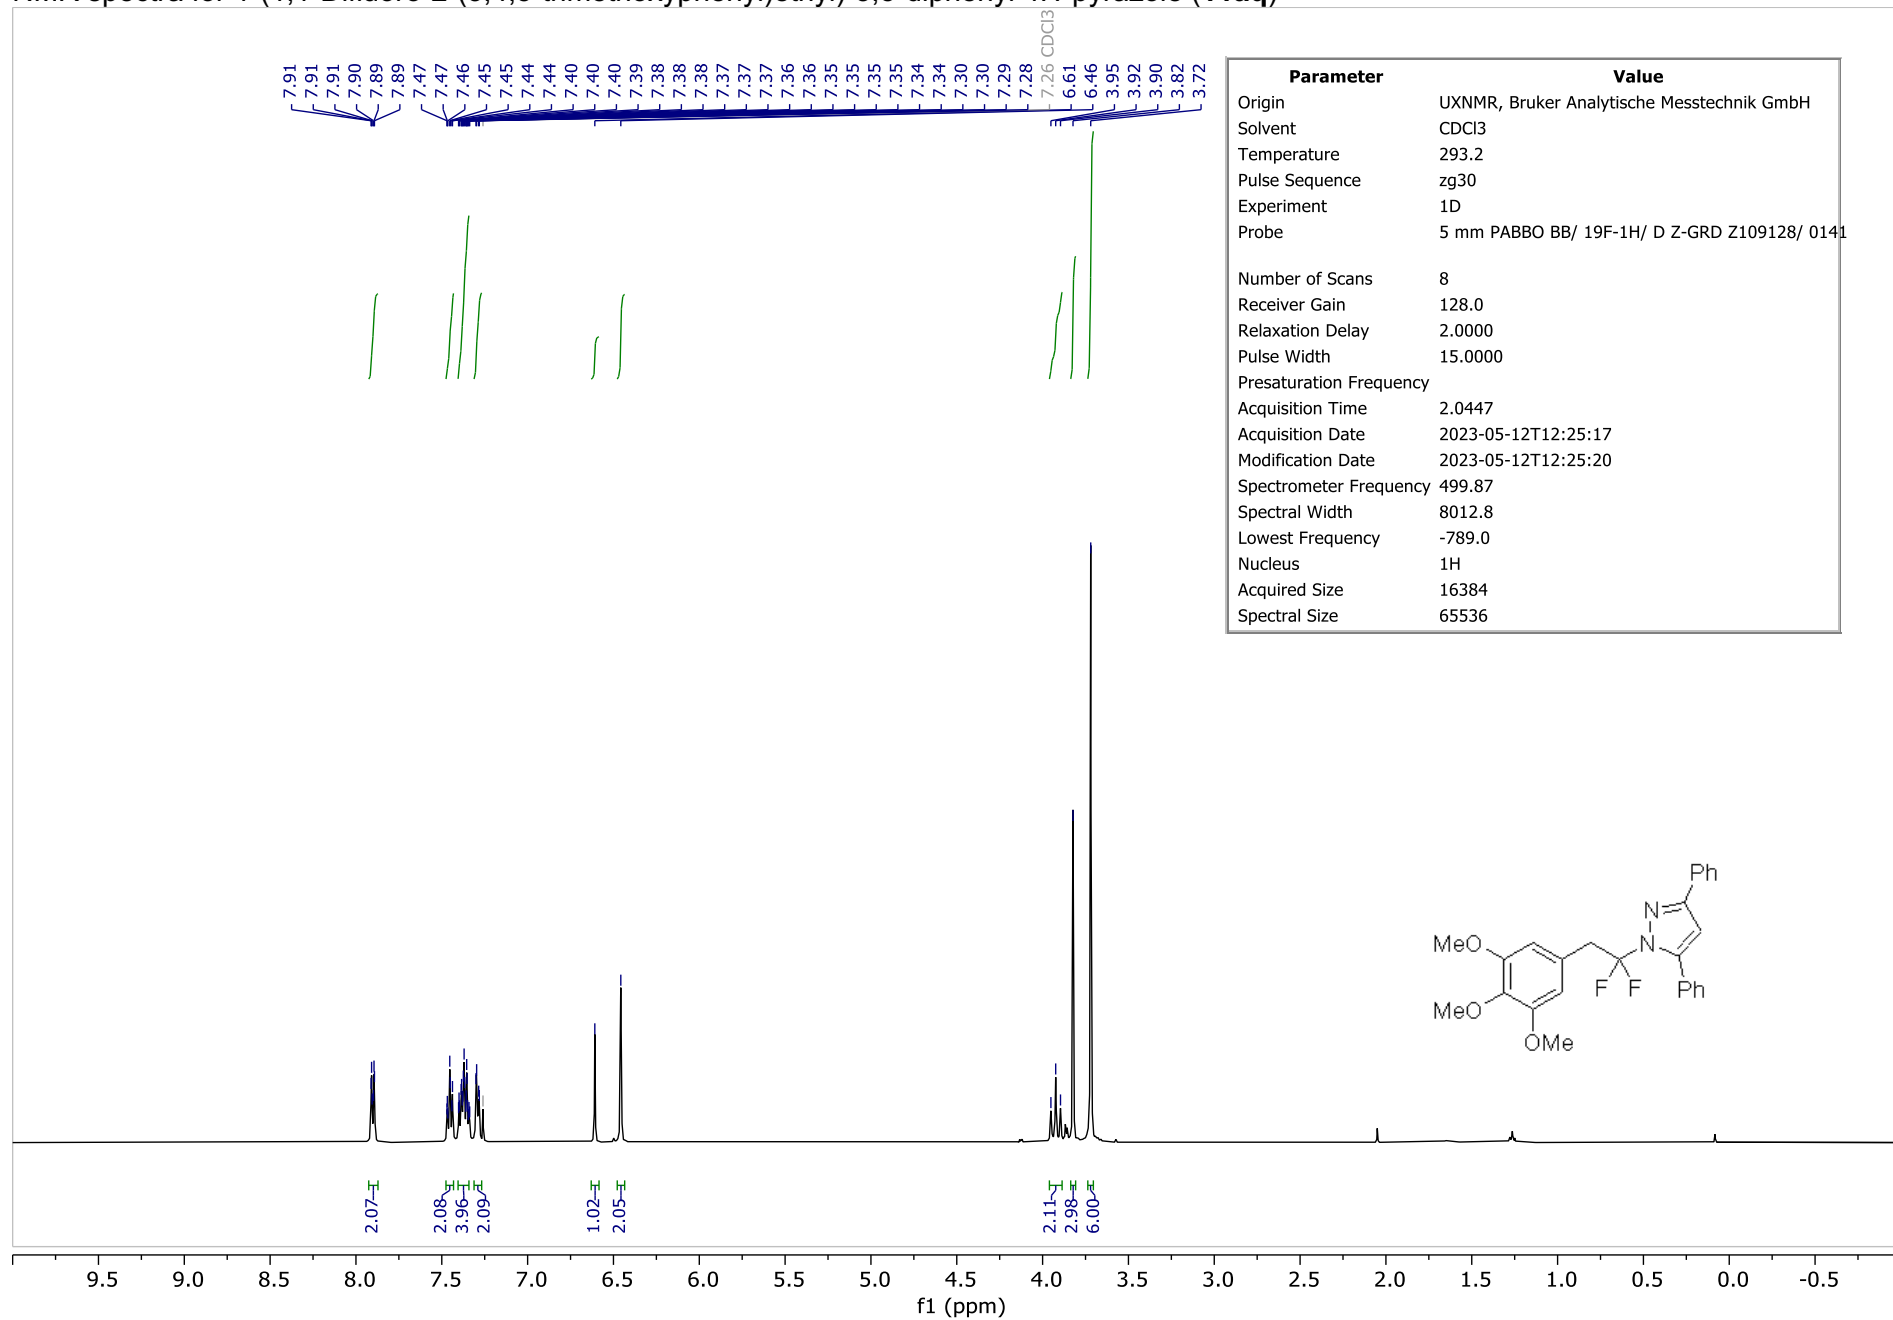

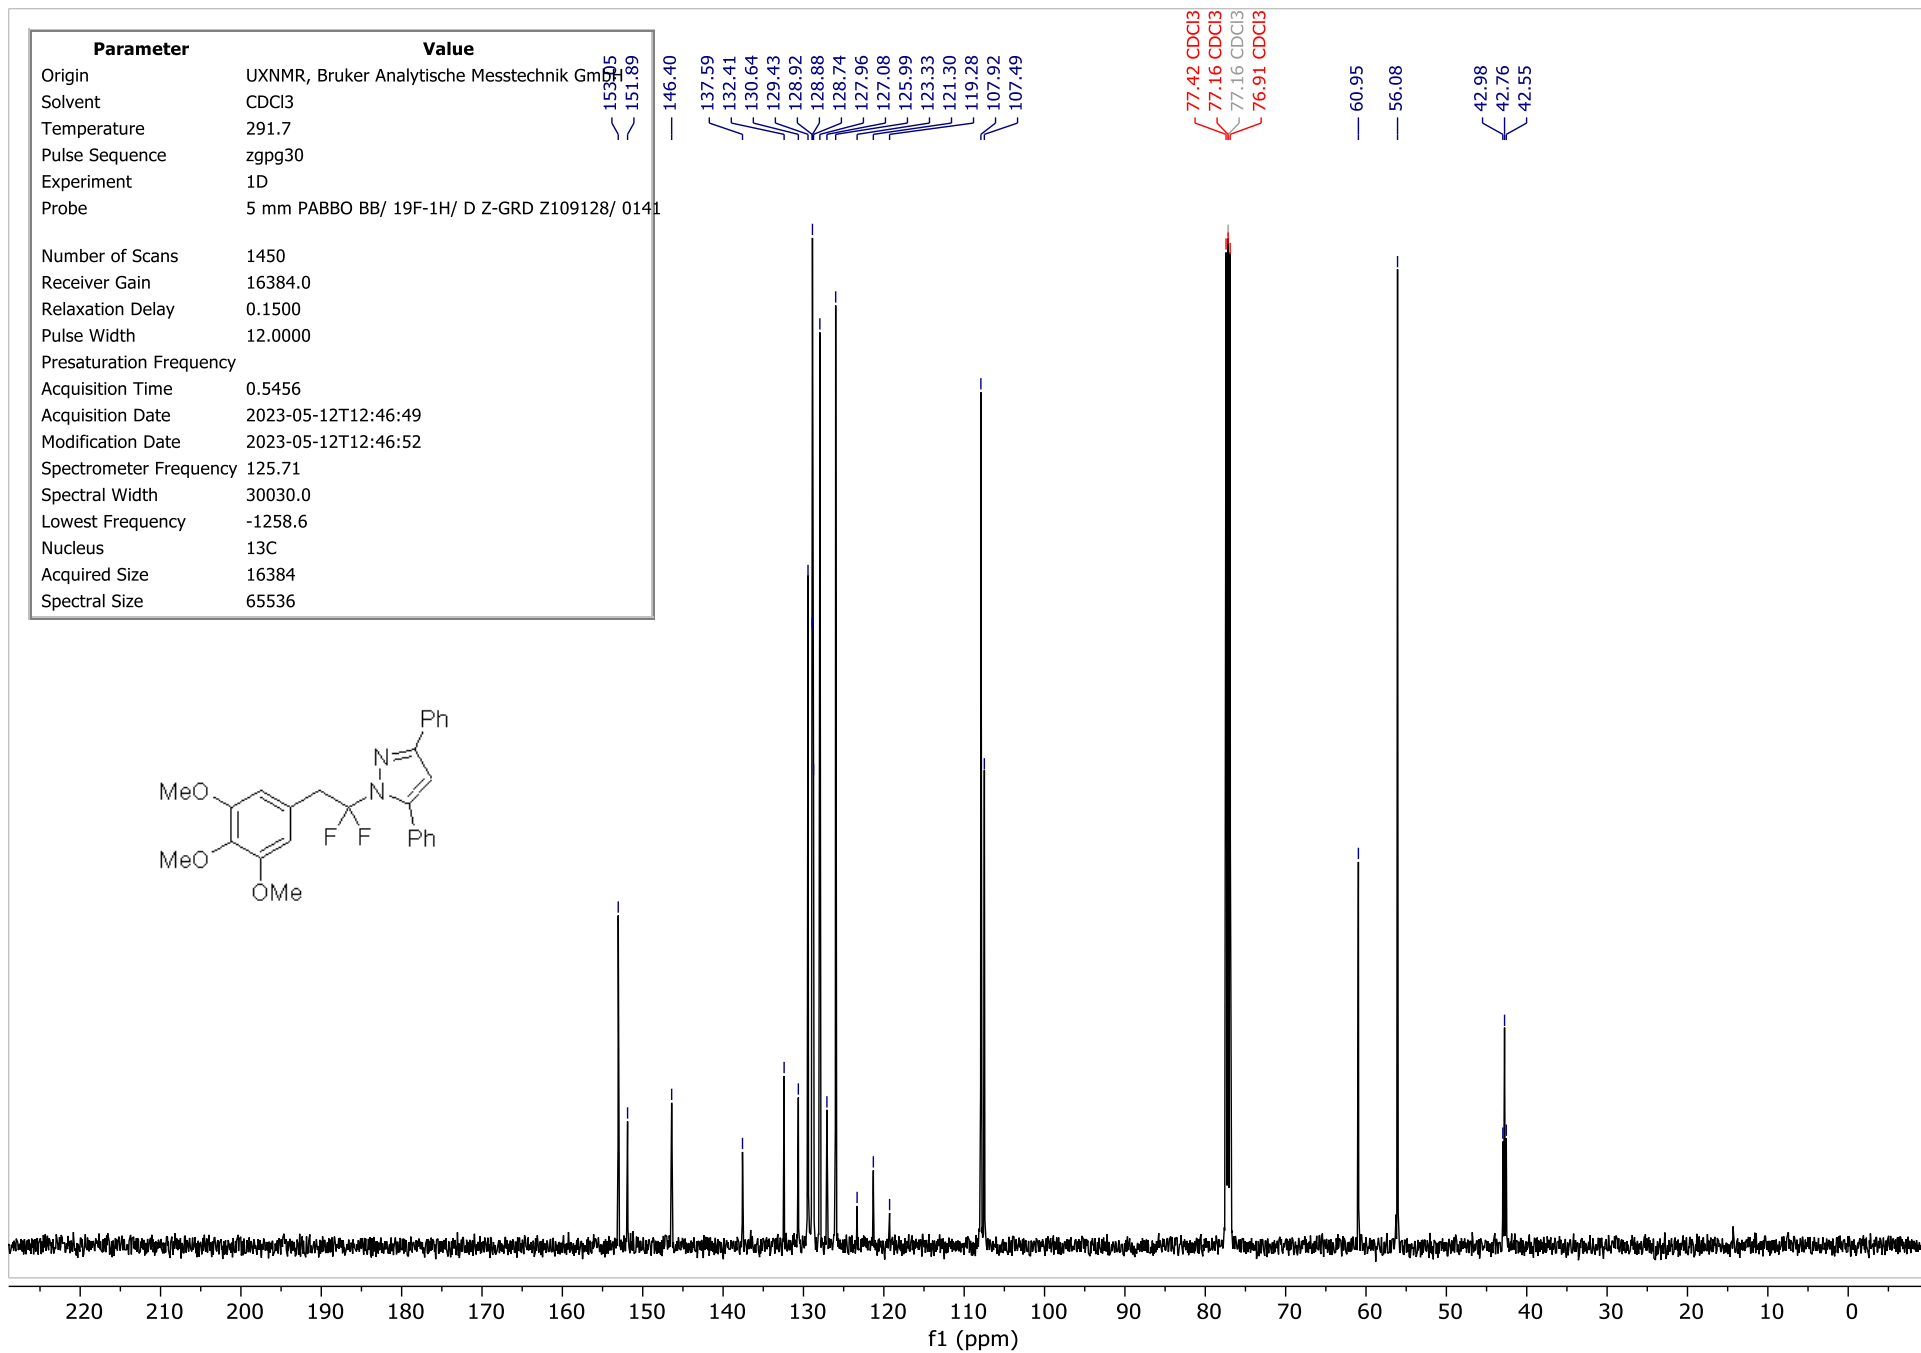

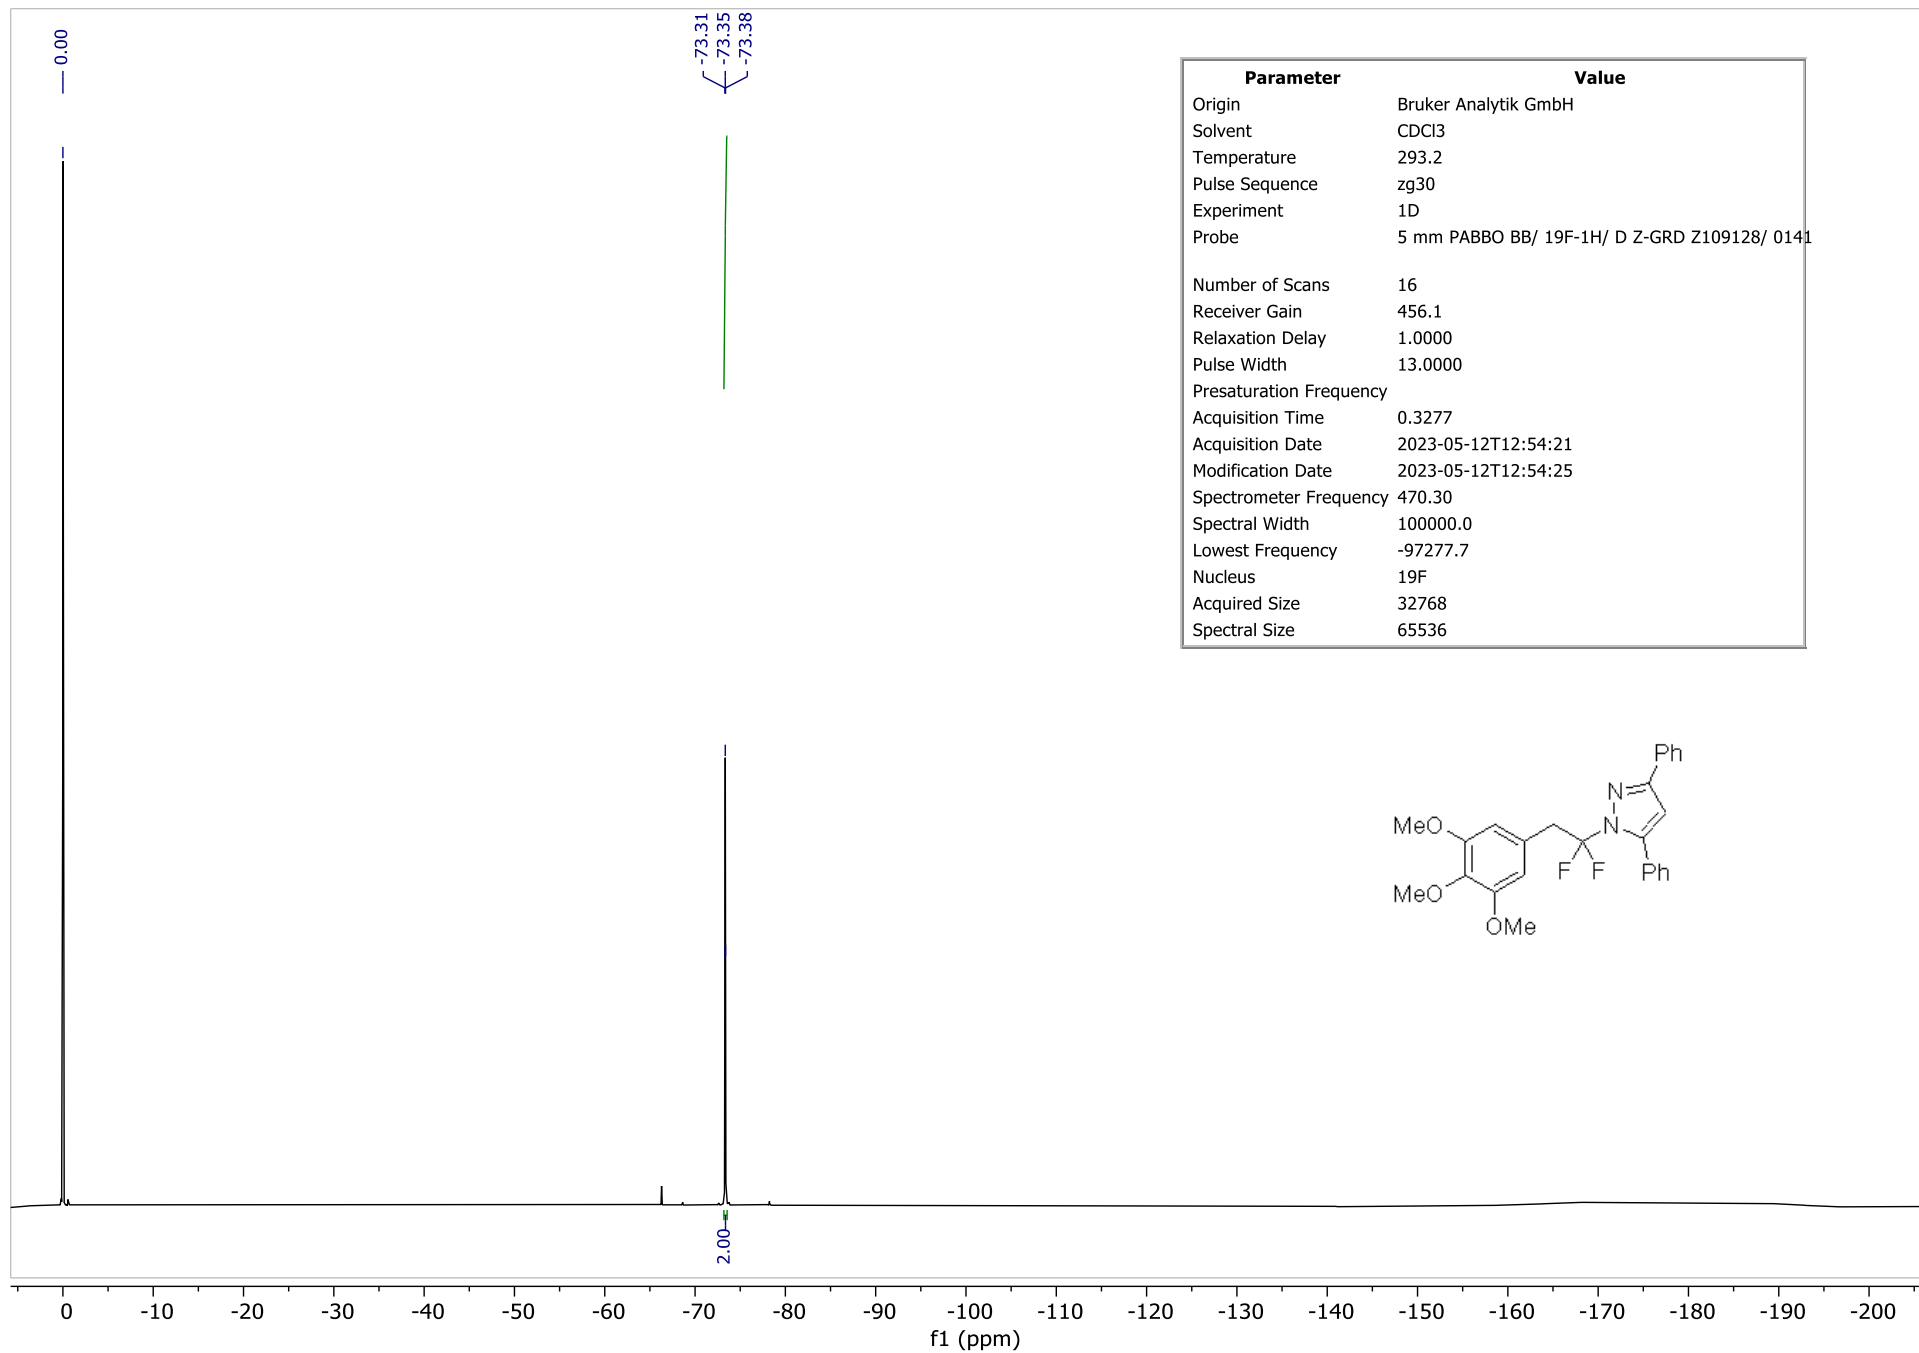

| Parameter               | Value                                        |
|-------------------------|----------------------------------------------|
| Origin                  | Bruker Analytik GmbH                         |
| Solvent                 | CDCl3                                        |
| Temperature             | 293.2                                        |
| Pulse Sequence          | zg30                                         |
| Experiment              | 1D                                           |
| Probe                   | 5 mm PABBO BB/ 19F-1H/ D Z-GRD Z109128/ 0141 |
| Number of Scans         | 16                                           |
| Receiver Gain           | 456.1                                        |
| Relaxation Delay        | 1.0000                                       |
| Pulse Width             | 13.0000                                      |
| Presaturation Frequency |                                              |
| Acquisition Time        | 0.3277                                       |
| Acquisition Date        | 2023-05-12T12:54:21                          |
| Modification Date       | 2023-05-12T12:54:25                          |
| Spectrometer Frequency  | 470.30                                       |
| Spectral Width          | 100000.0                                     |
| Lowest Frequency        | -97277.7                                     |
| Nucleus                 | 19F                                          |
| Acquired Size           | 32768                                        |
| Spectral Size           | 65536                                        |

NMR spectra for 1-(1,1-difluoro-2-(3,4,5-trimethoxyphenyl)ethyl)-4-(4,4,5,5-tetramethyl-1,3,2-dioxaborolan-2-yl)-1H-pyrazole (**11ar**)

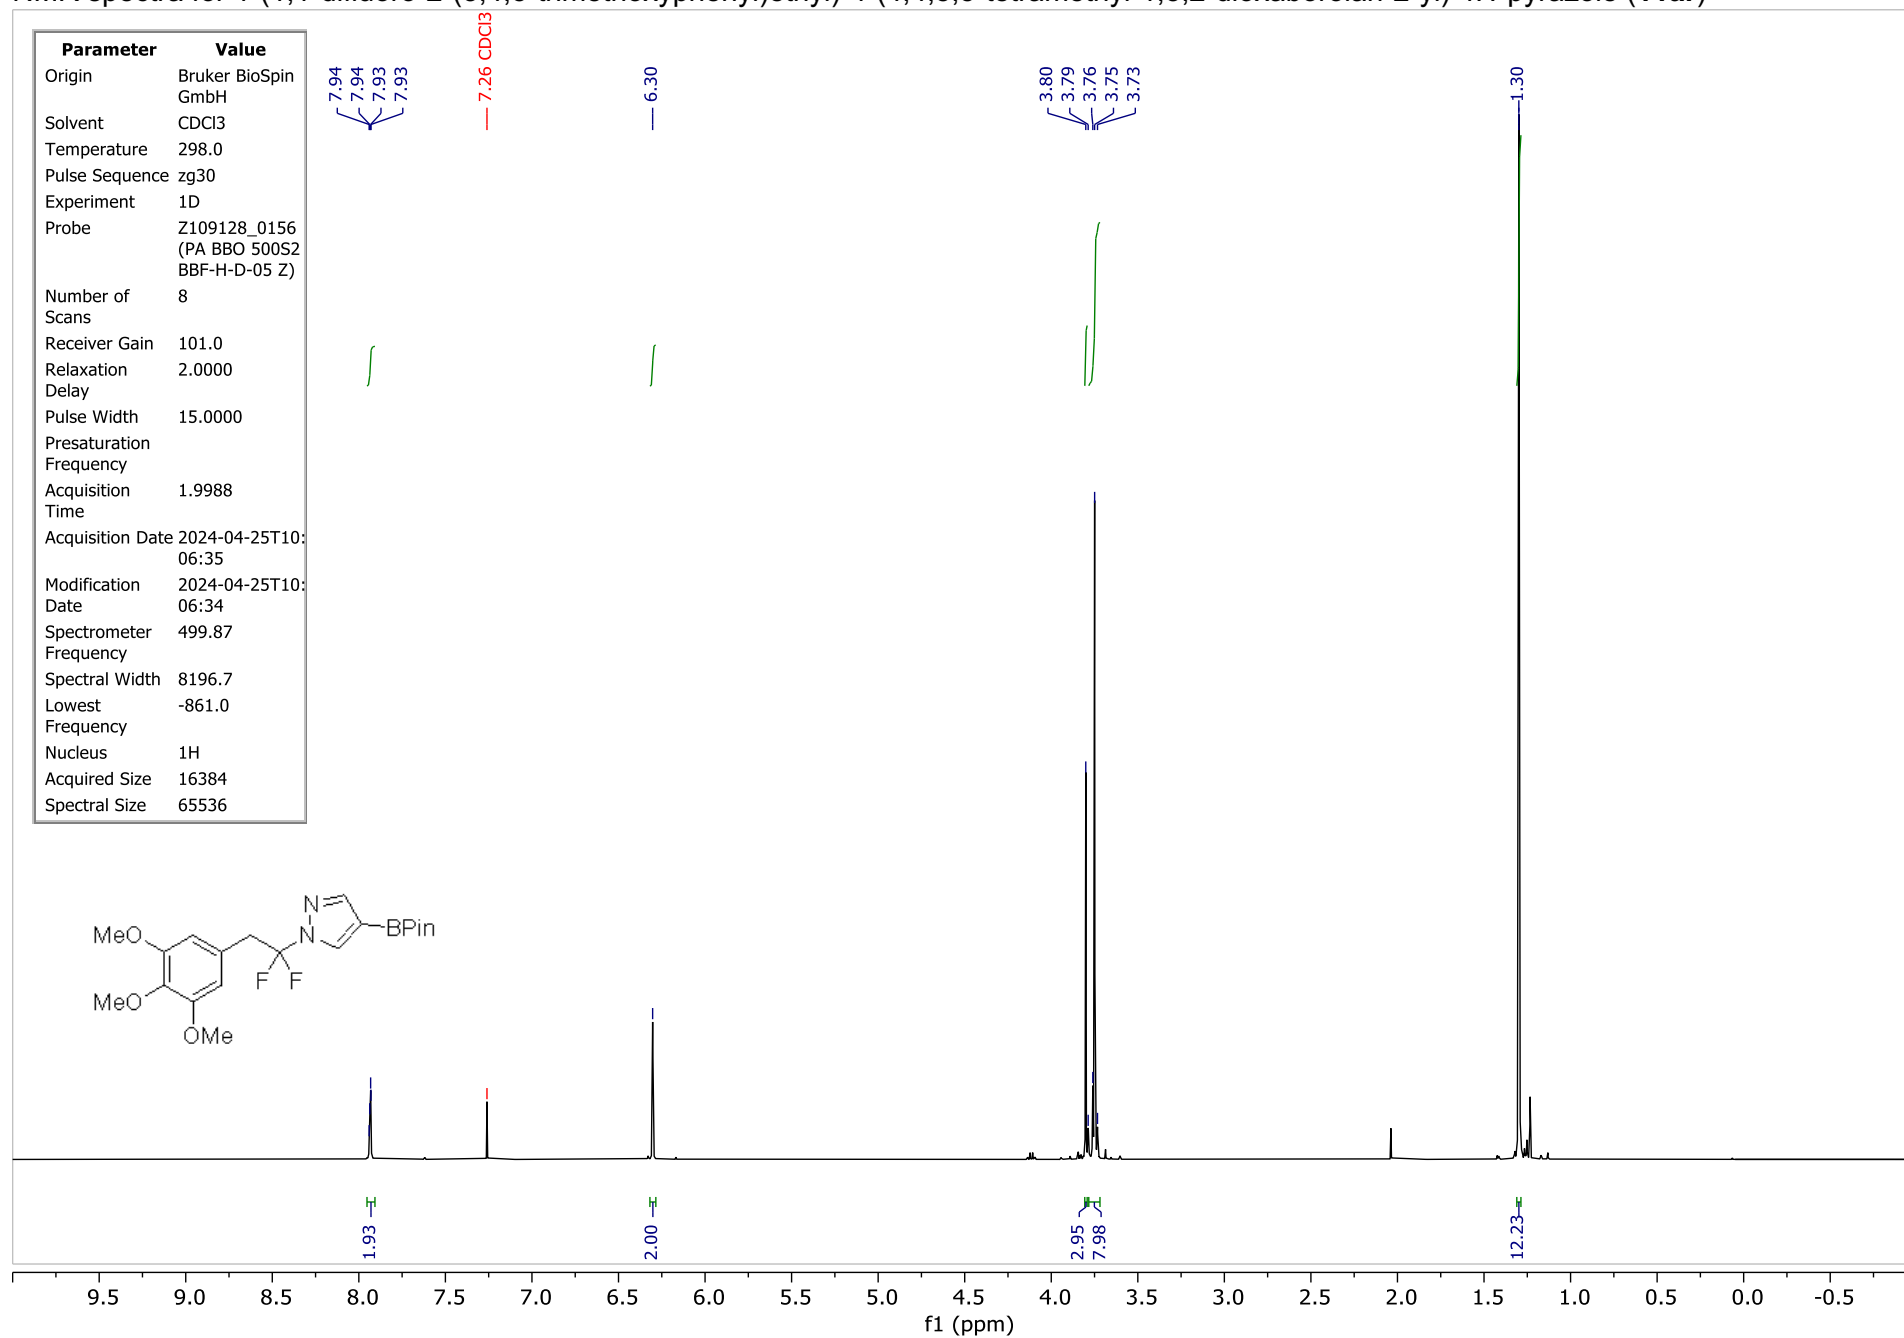

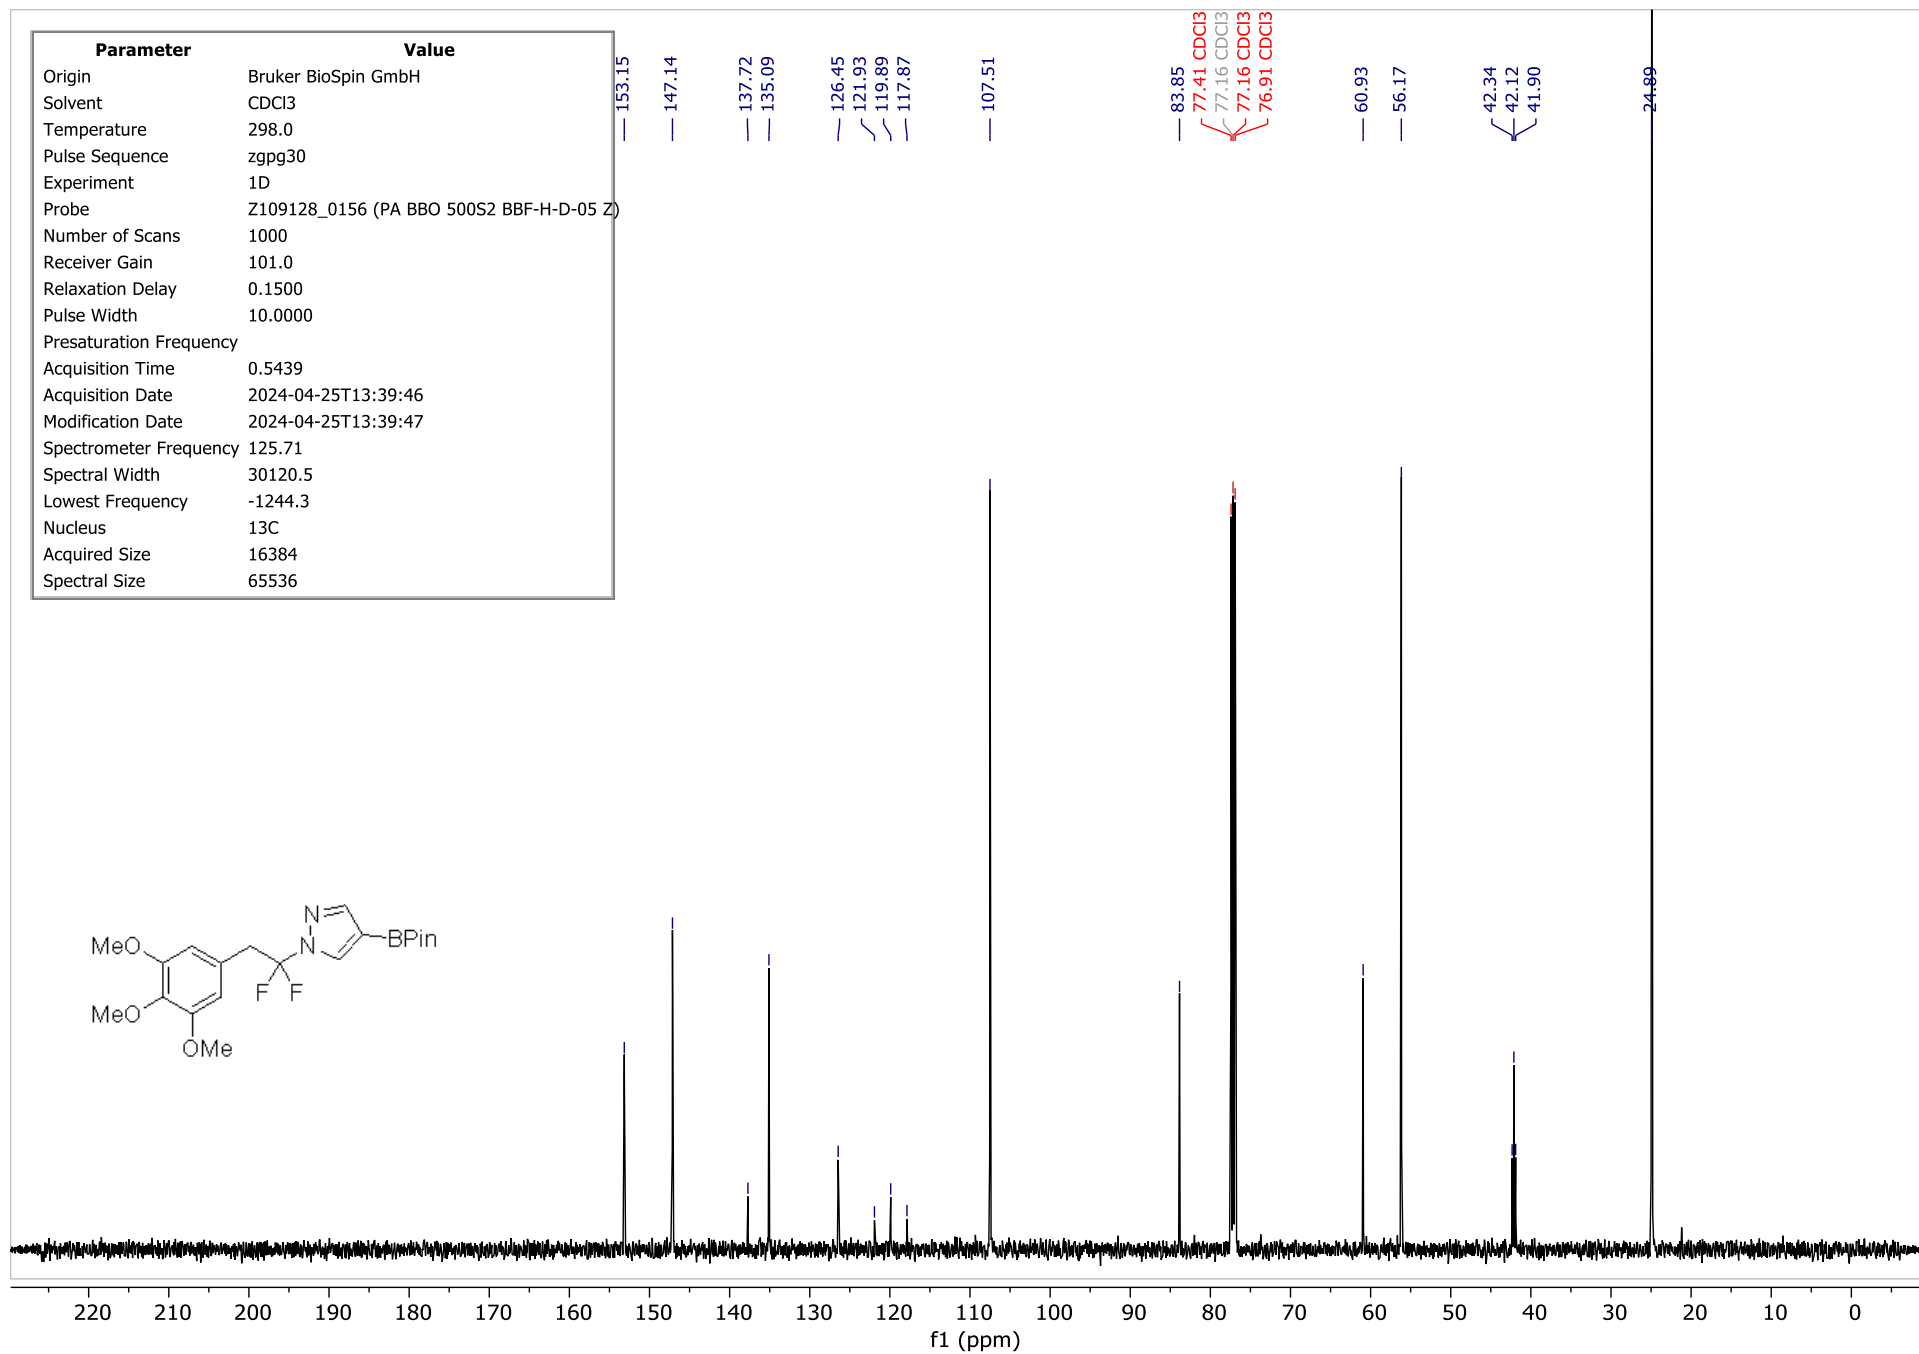



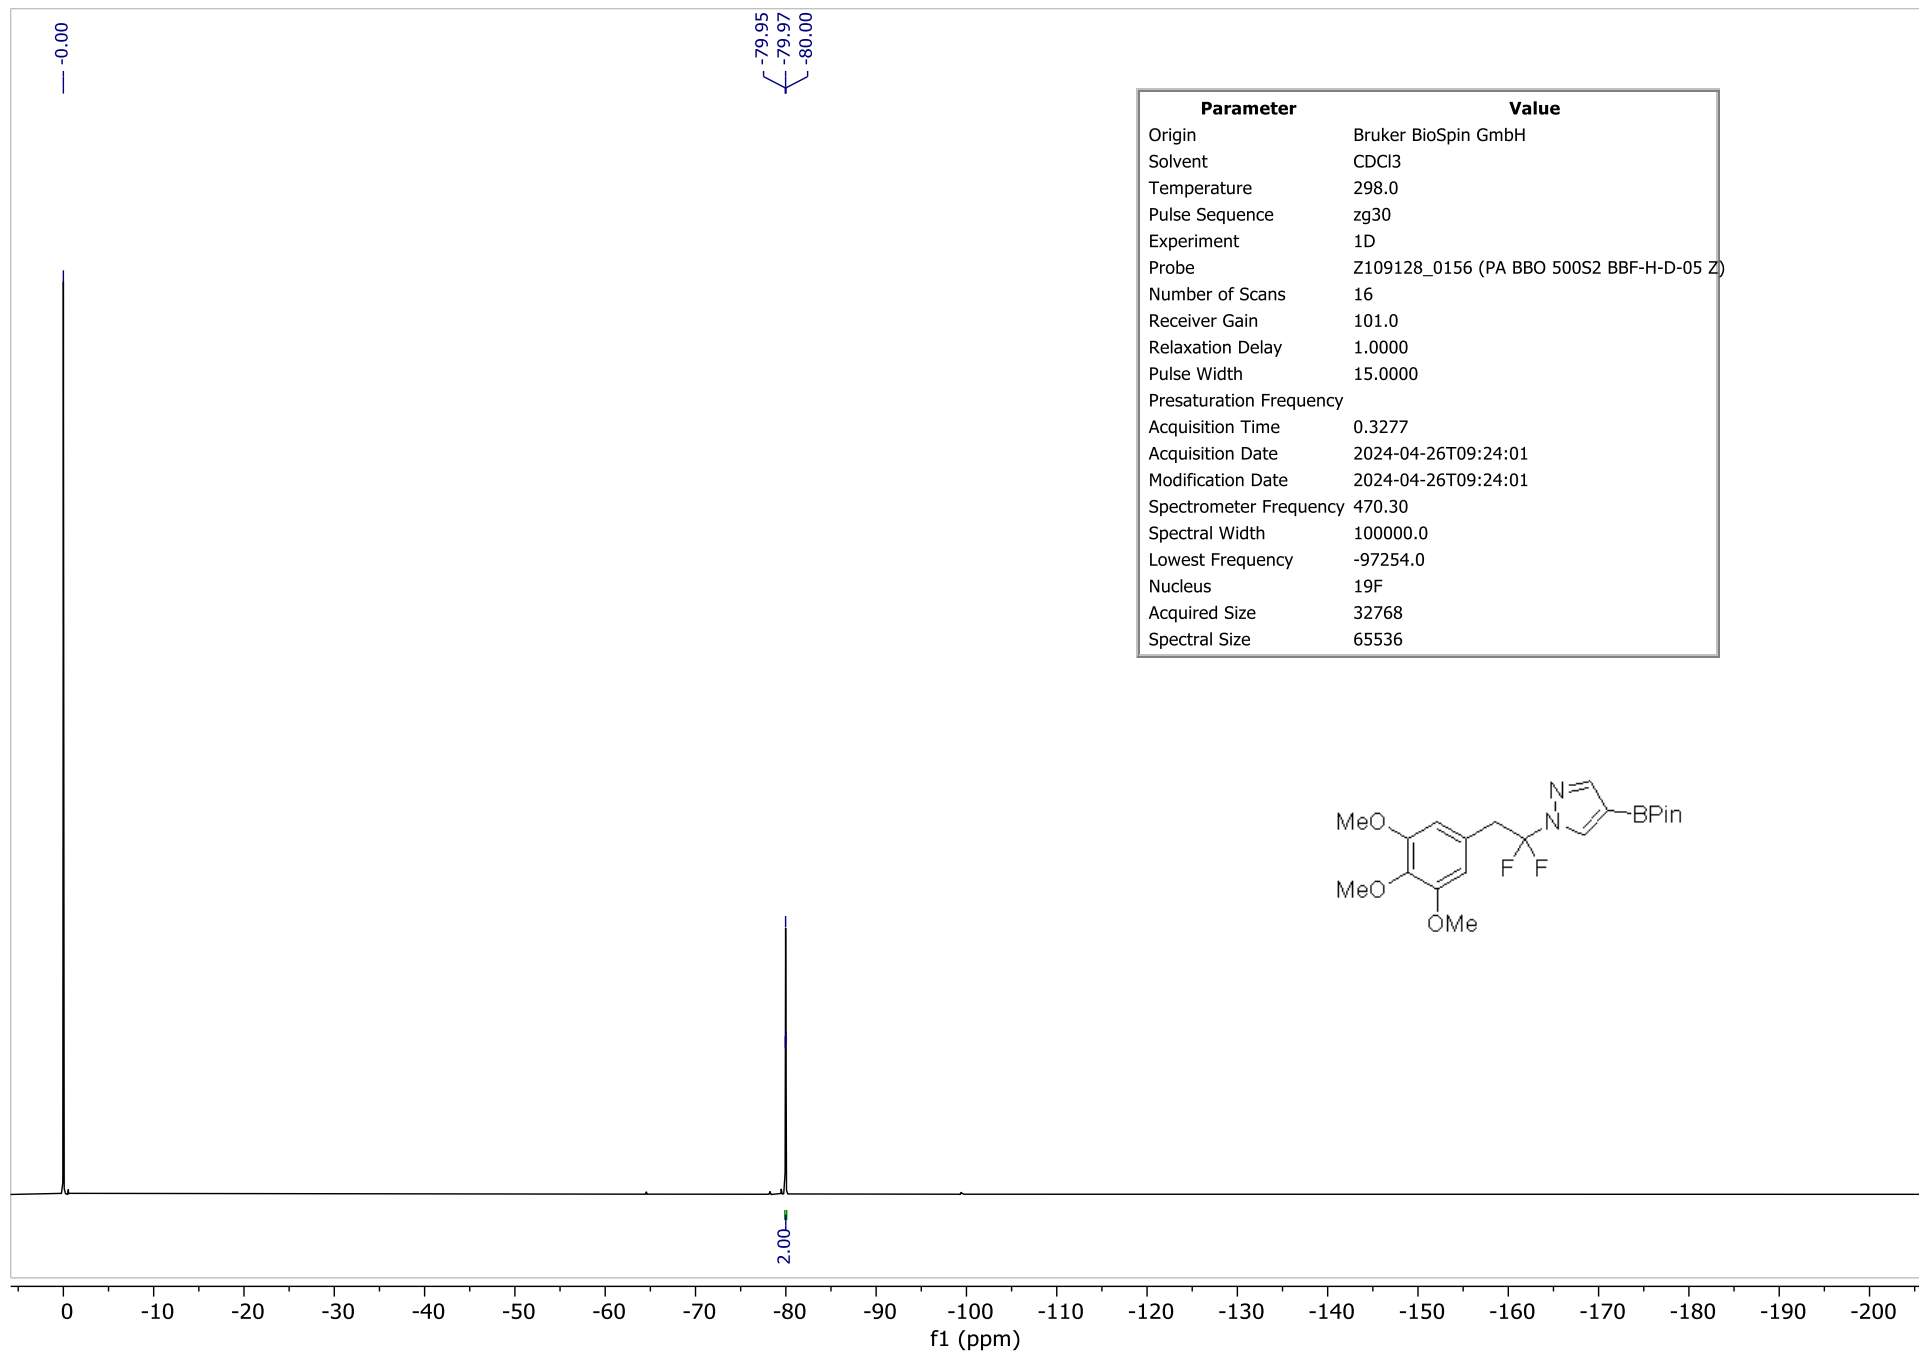

NMR spectra for 4,5-dichloro-1-(1,1-difluoro-2-(3,4,5-trimethoxyphenyl)ethyl)-1*H*-imidazole (**11as**)

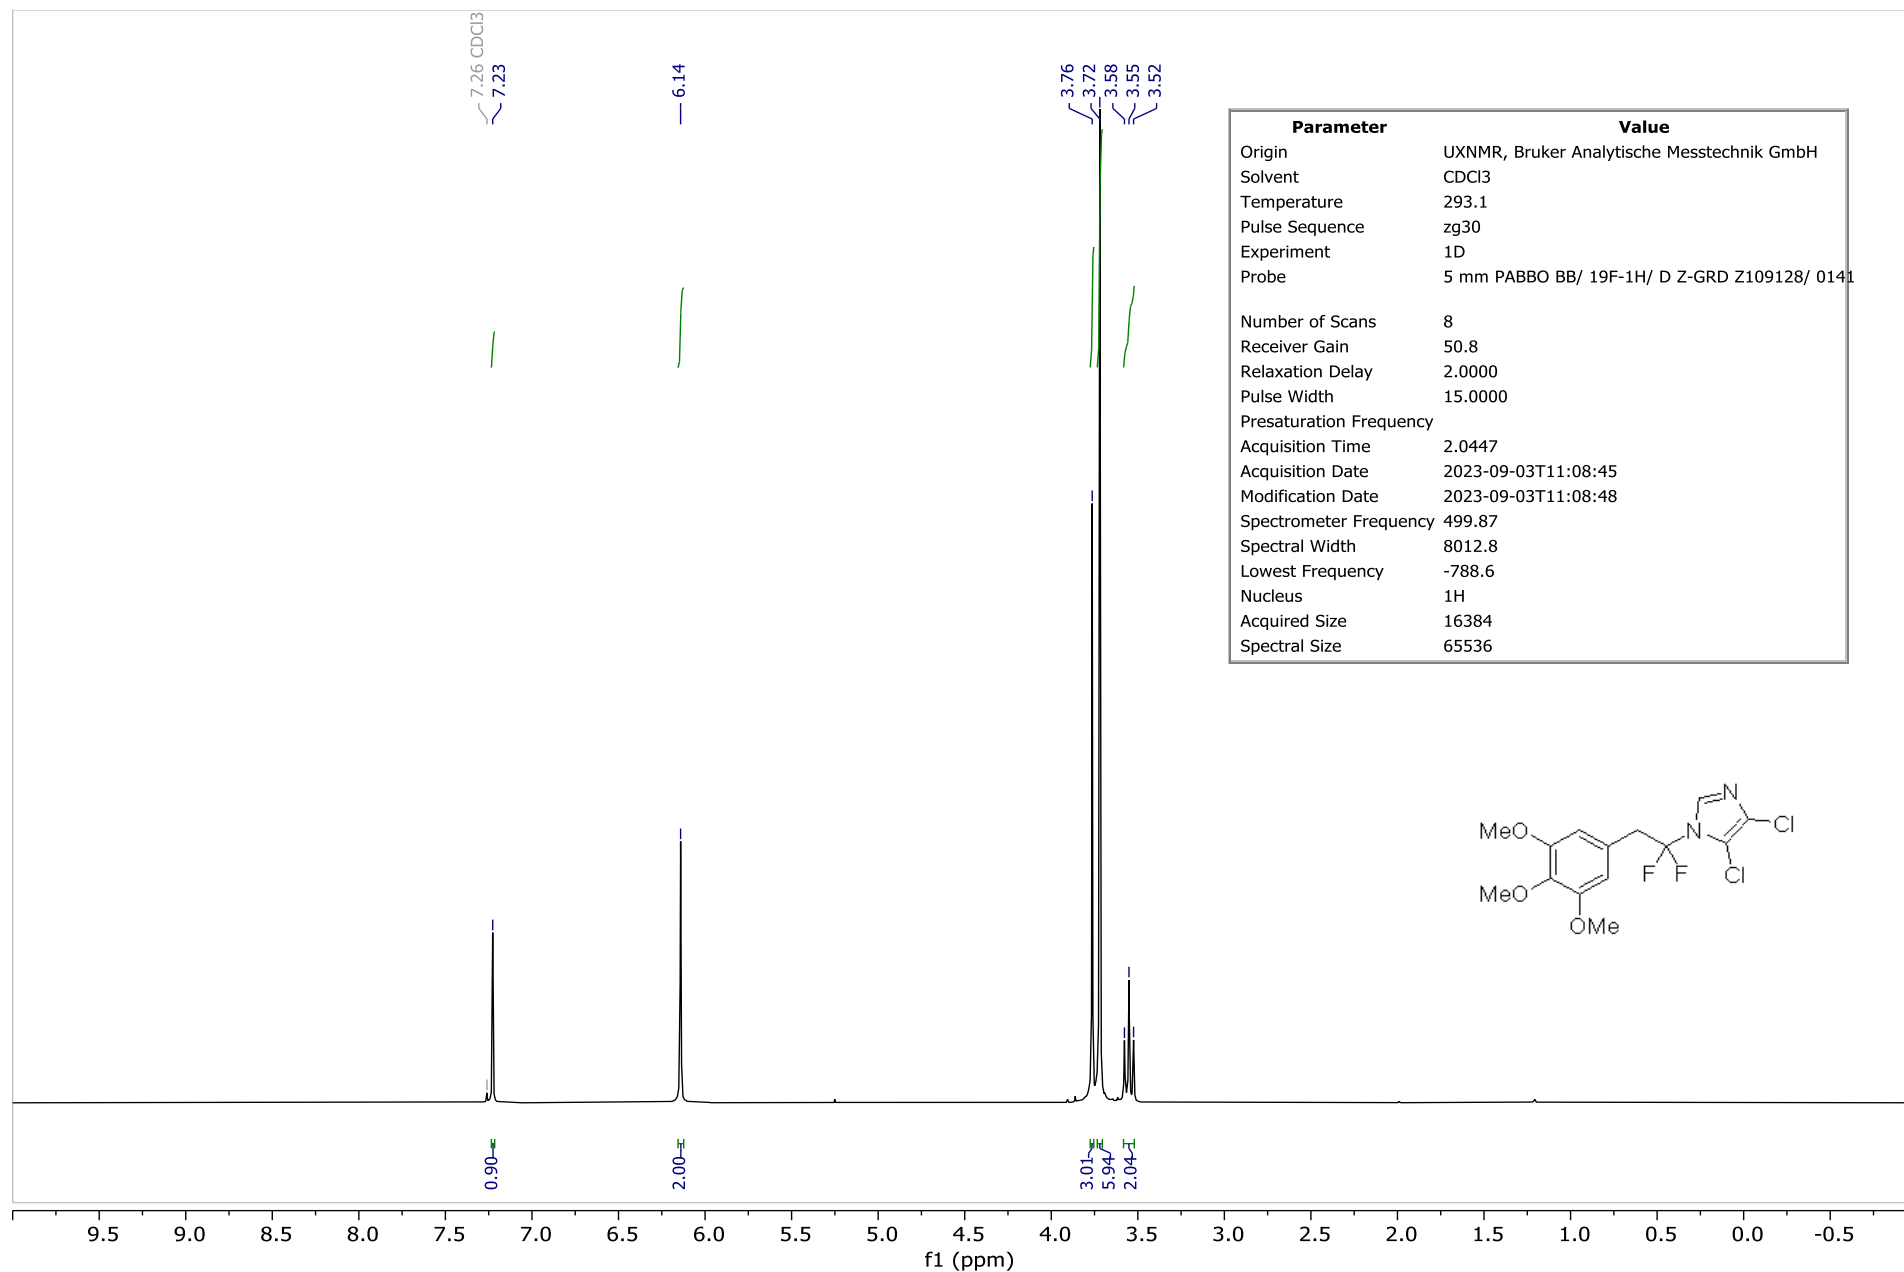

| Parameter               | Value                                           |
|-------------------------|-------------------------------------------------|
| Origin                  | Bruker Analytik GmbH                            |
| Solvent                 | CDCl <sub>3</sub>                               |
| Temperature             | 293.9                                           |
| Pulse Sequence          | zgpg30                                          |
| Experiment              | 1D                                              |
| Probe                   | 5 mm PABBO BB/ 19F-1H/ D Z-GRD<br>Z109128/ 0141 |
| Number of Scans         | 2747                                            |
| Receiver Gain           | 16384.0                                         |
| Relaxation Delay        | 0.1500                                          |
| Pulse Width             | 12.0000                                         |
| Presaturation Frequency |                                                 |
| Acquisition Time        | 0.5456                                          |
| Acquisition Date        | 2023-09-03T11:49:22                             |
| Modification Date       | 2023-09-03T11:49:25                             |
| Spectrometer Frequency  | 125.71                                          |
| Spectral Width          | 30030.0                                         |
| Lowest Frequency        | -1270.0                                         |
| Nucleus                 | <sup>13</sup> C                                 |
| Acquired Size           | 16384                                           |
| Spectral Size           | 65536                                           |

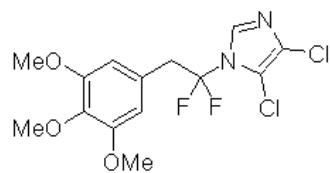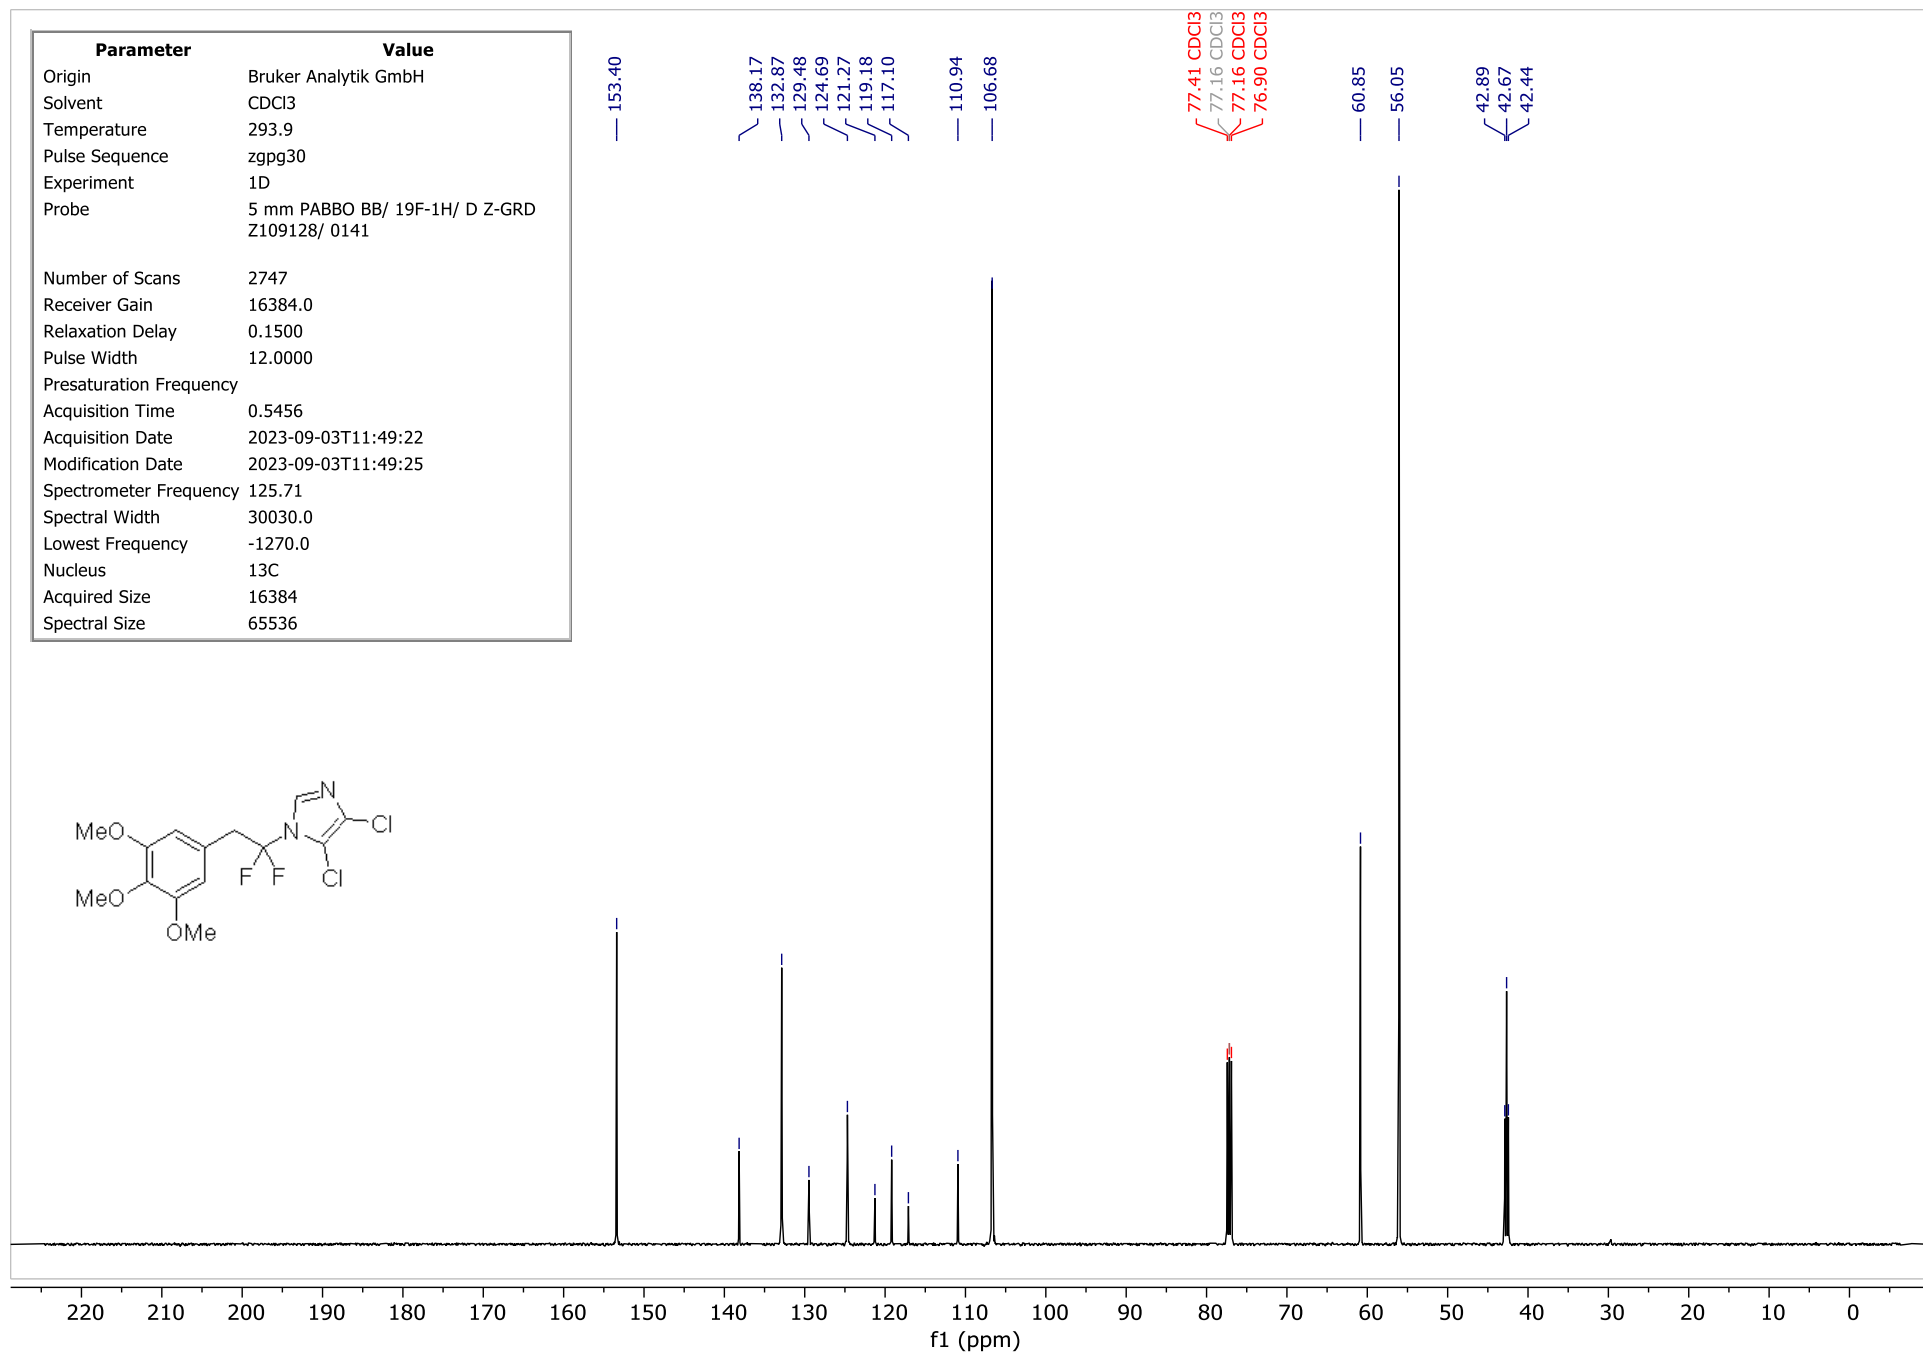

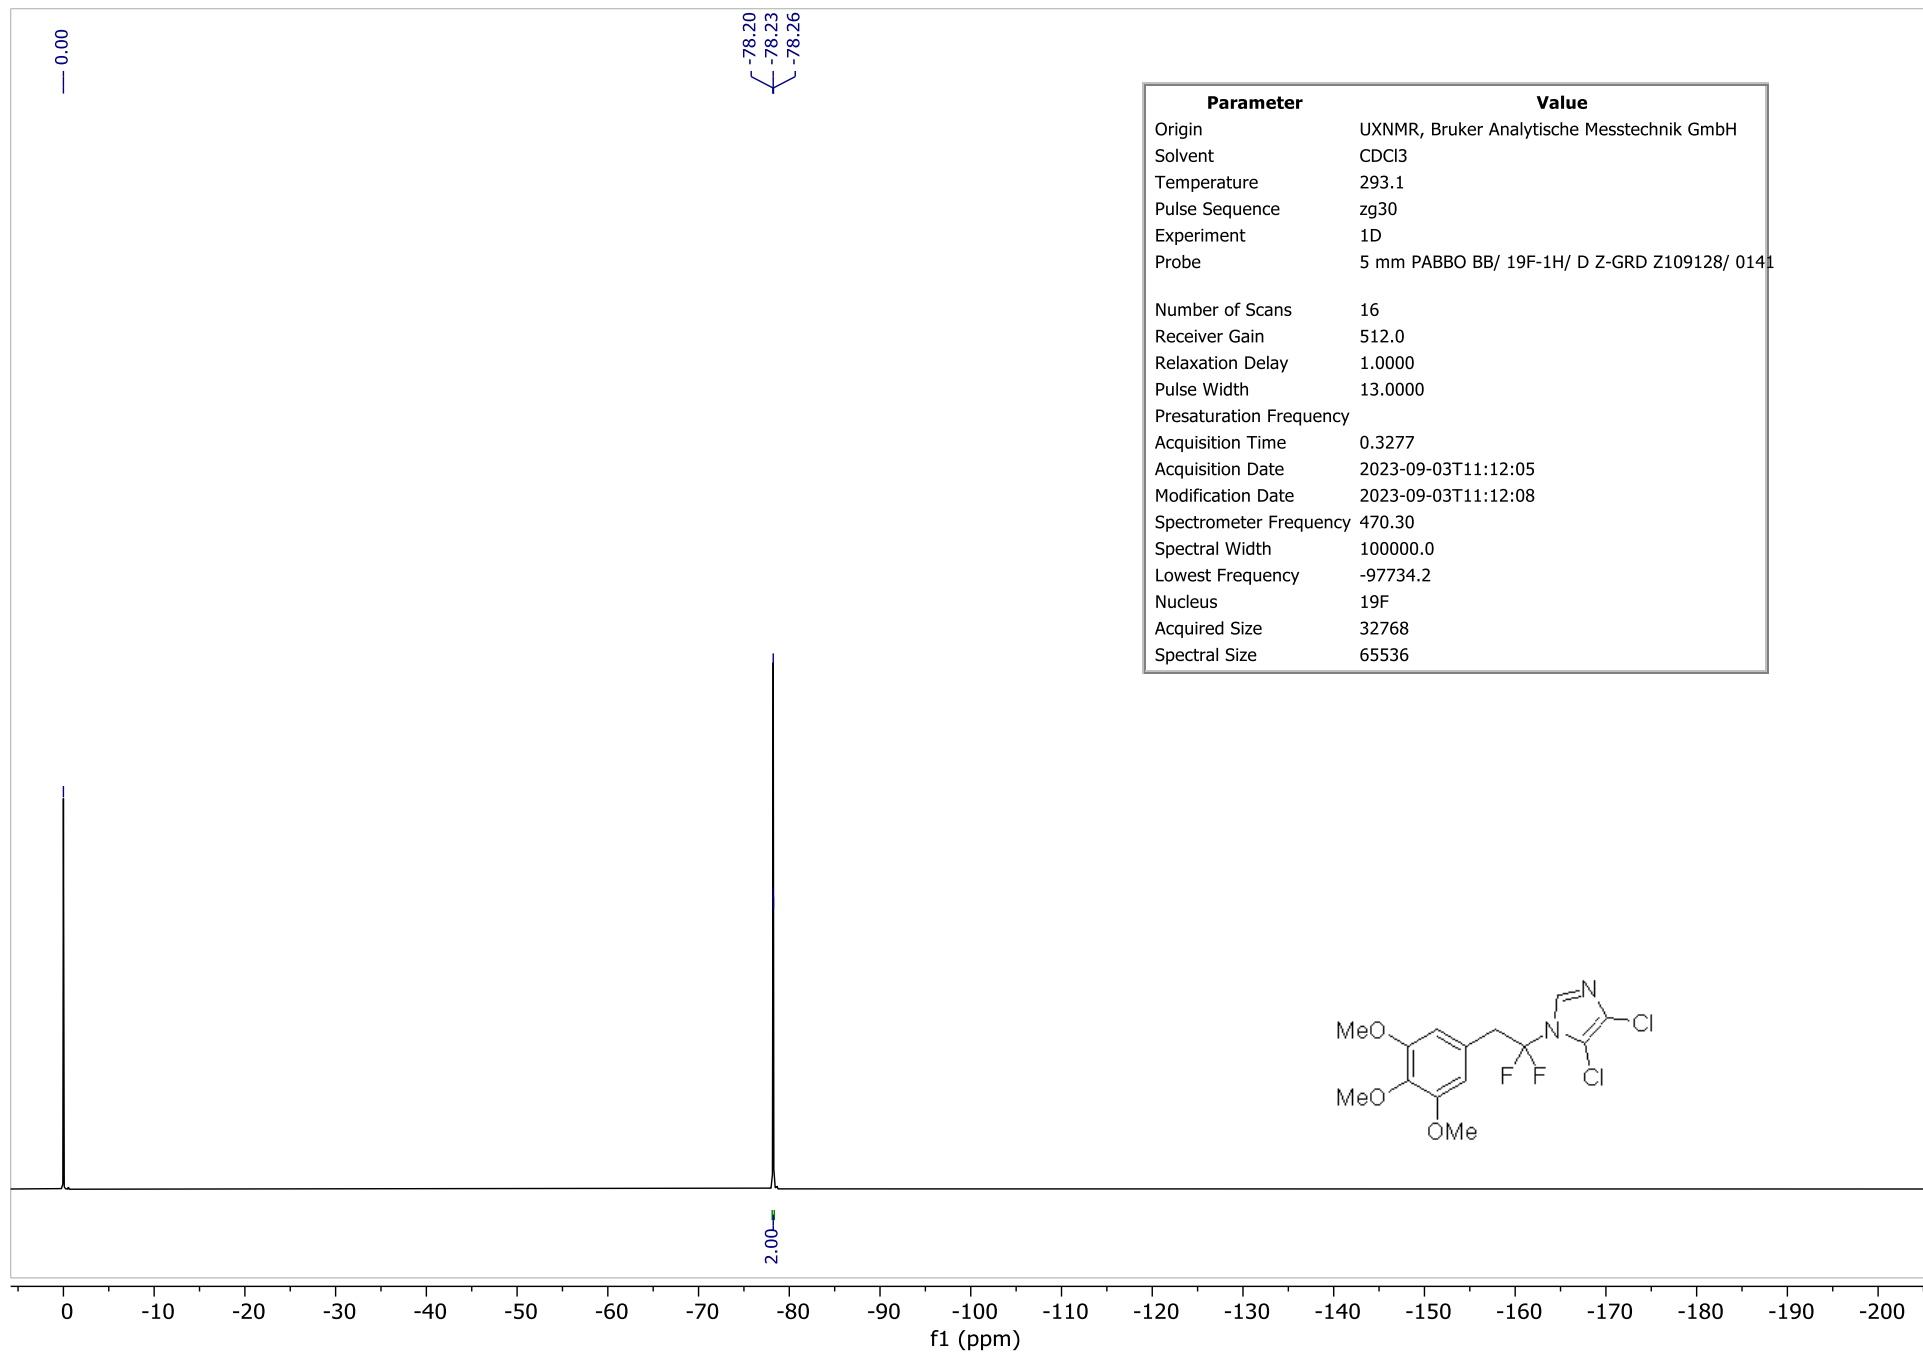

NMR spectra for 1-(1,1-difluoro-2-(3,4,5-trimethoxyphenyl)ethyl)-1H-1,2,3-triazole (**11at**)

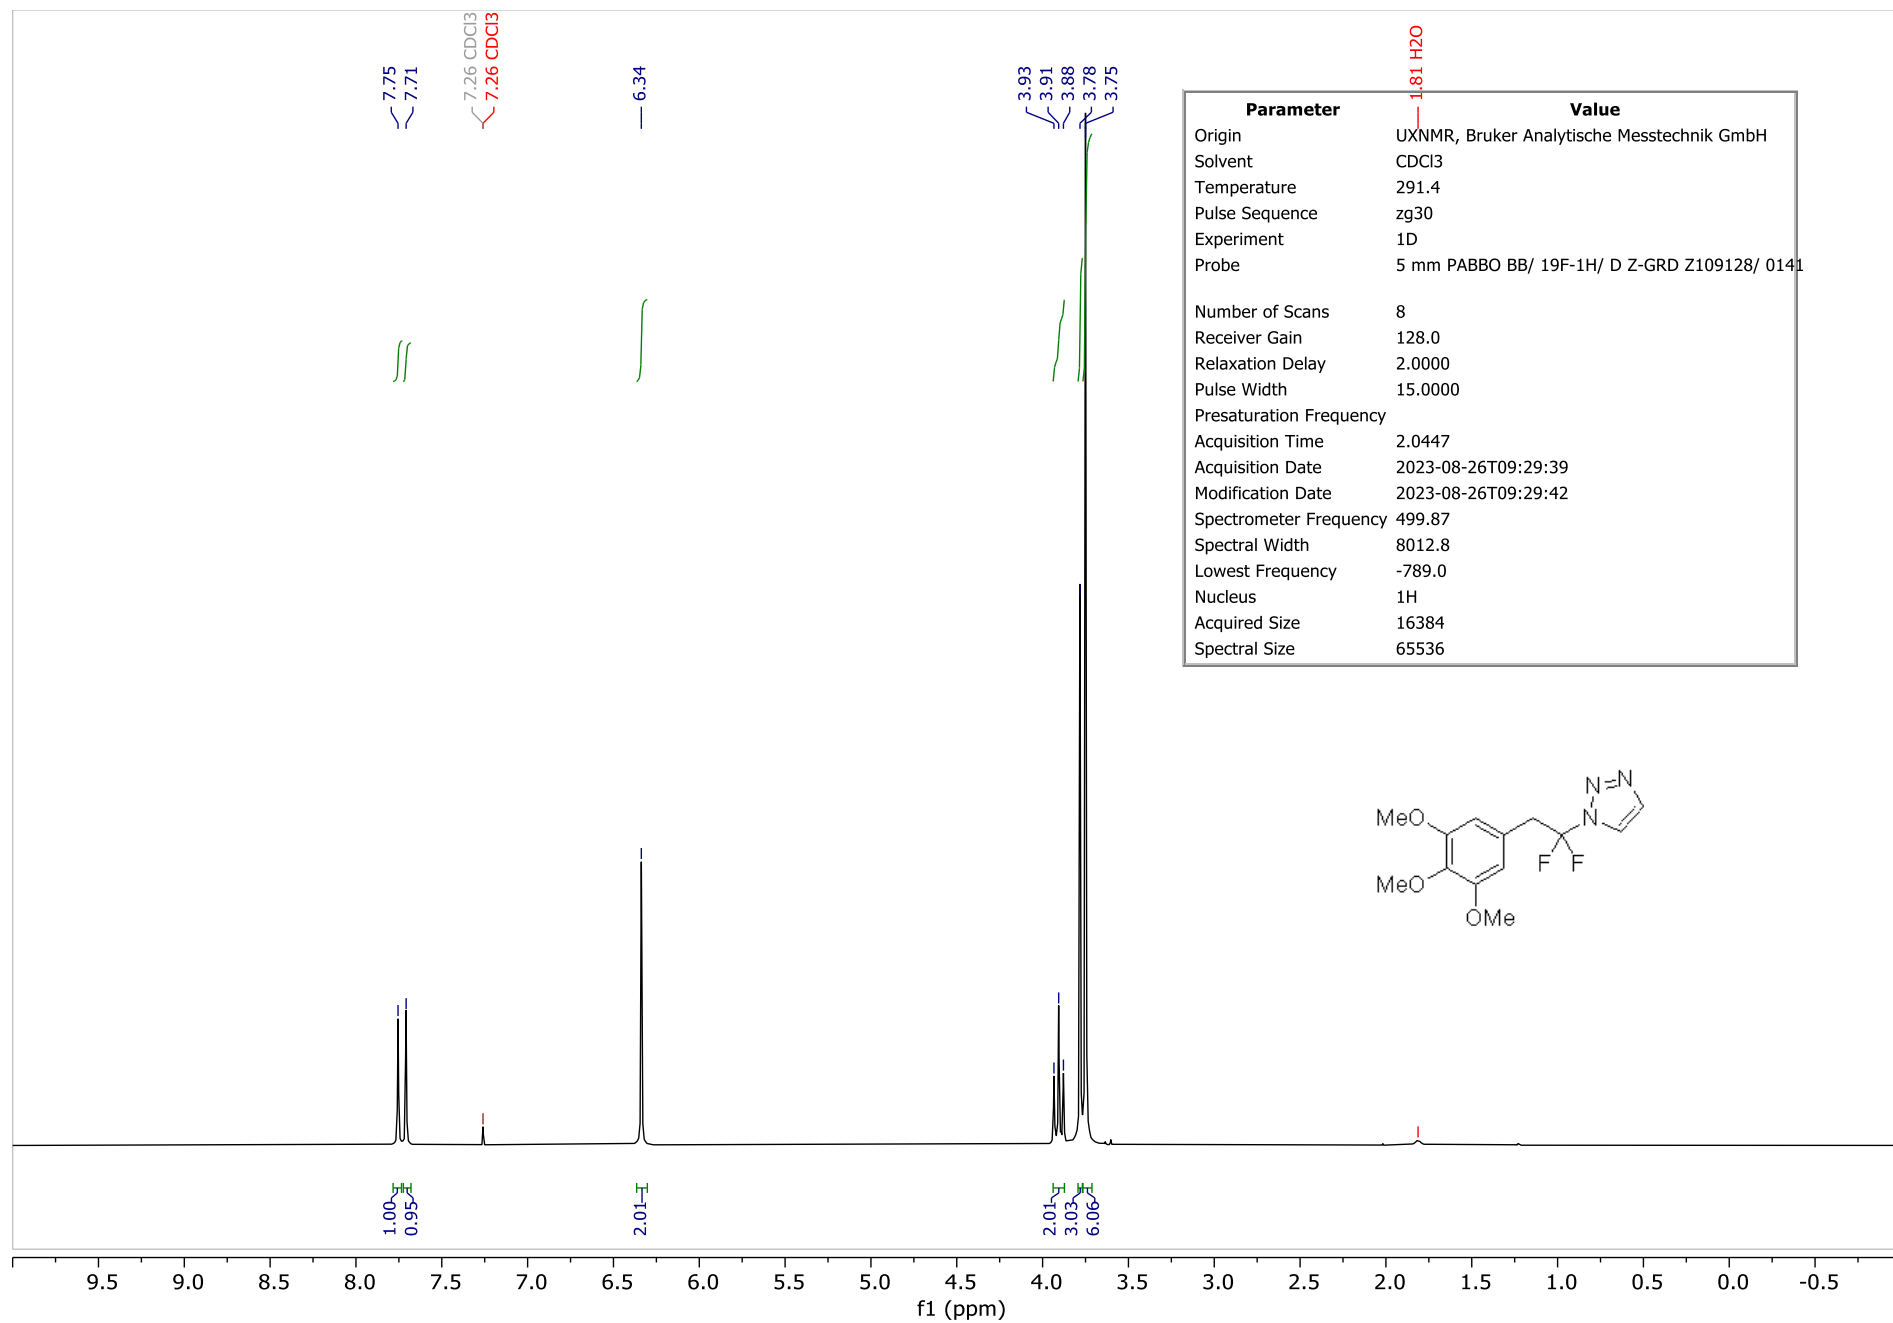

| Parameter               | Value                                        |
|-------------------------|----------------------------------------------|
| Origin                  | UXNMR, Bruker Analytische Messtechnik GmbH   |
| Solvent                 | CDCl <sub>3</sub>                            |
| Temperature             | 292.1                                        |
| Pulse Sequence          | zgpg30                                       |
| Experiment              | 1D                                           |
| Probe                   | 5 mm PABBO BB/ 19F-1H/ D Z-GRD Z109128/ 0141 |
| Number of Scans         | 496                                          |
| Receiver Gain           | 16384.0                                      |
| Relaxation Delay        | 0.1500                                       |
| Pulse Width             | 12.0000                                      |
| Presaturation Frequency |                                              |
| Acquisition Time        | 0.5456                                       |
| Acquisition Date        | 2023-08-26T09:38:02                          |
| Modification Date       | 2023-08-26T09:38:06                          |
| Spectrometer Frequency  | 125.71                                       |
| Spectral Width          | 30030.0                                      |
| Lowest Frequency        | -1261.8                                      |
| Nucleus                 | <sup>13</sup> C                              |
| Acquired Size           | 16384                                        |
| Spectral Size           | 65536                                        |

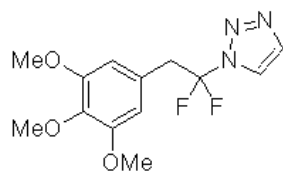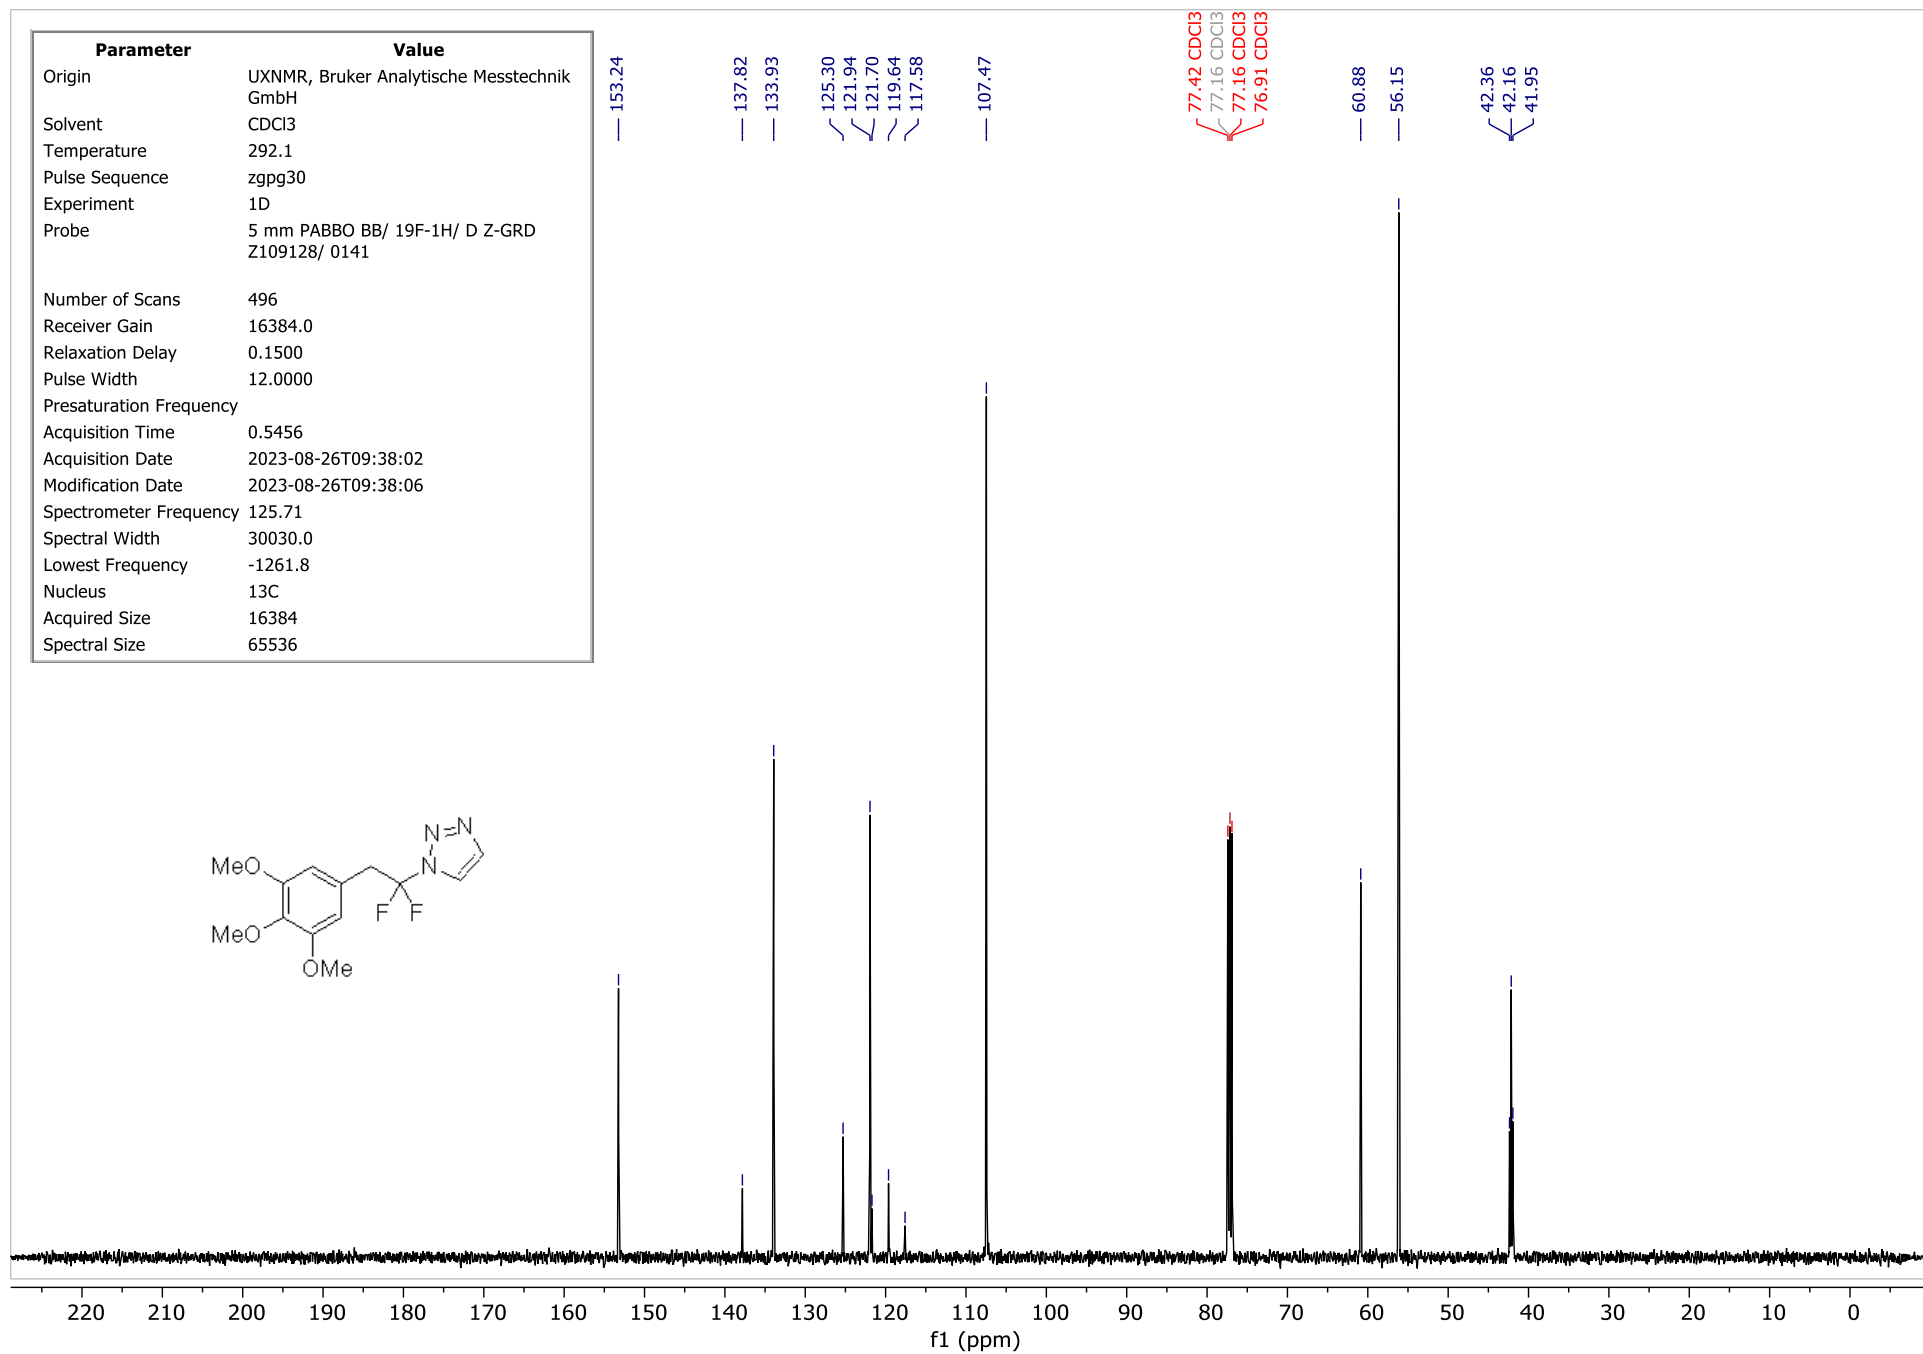

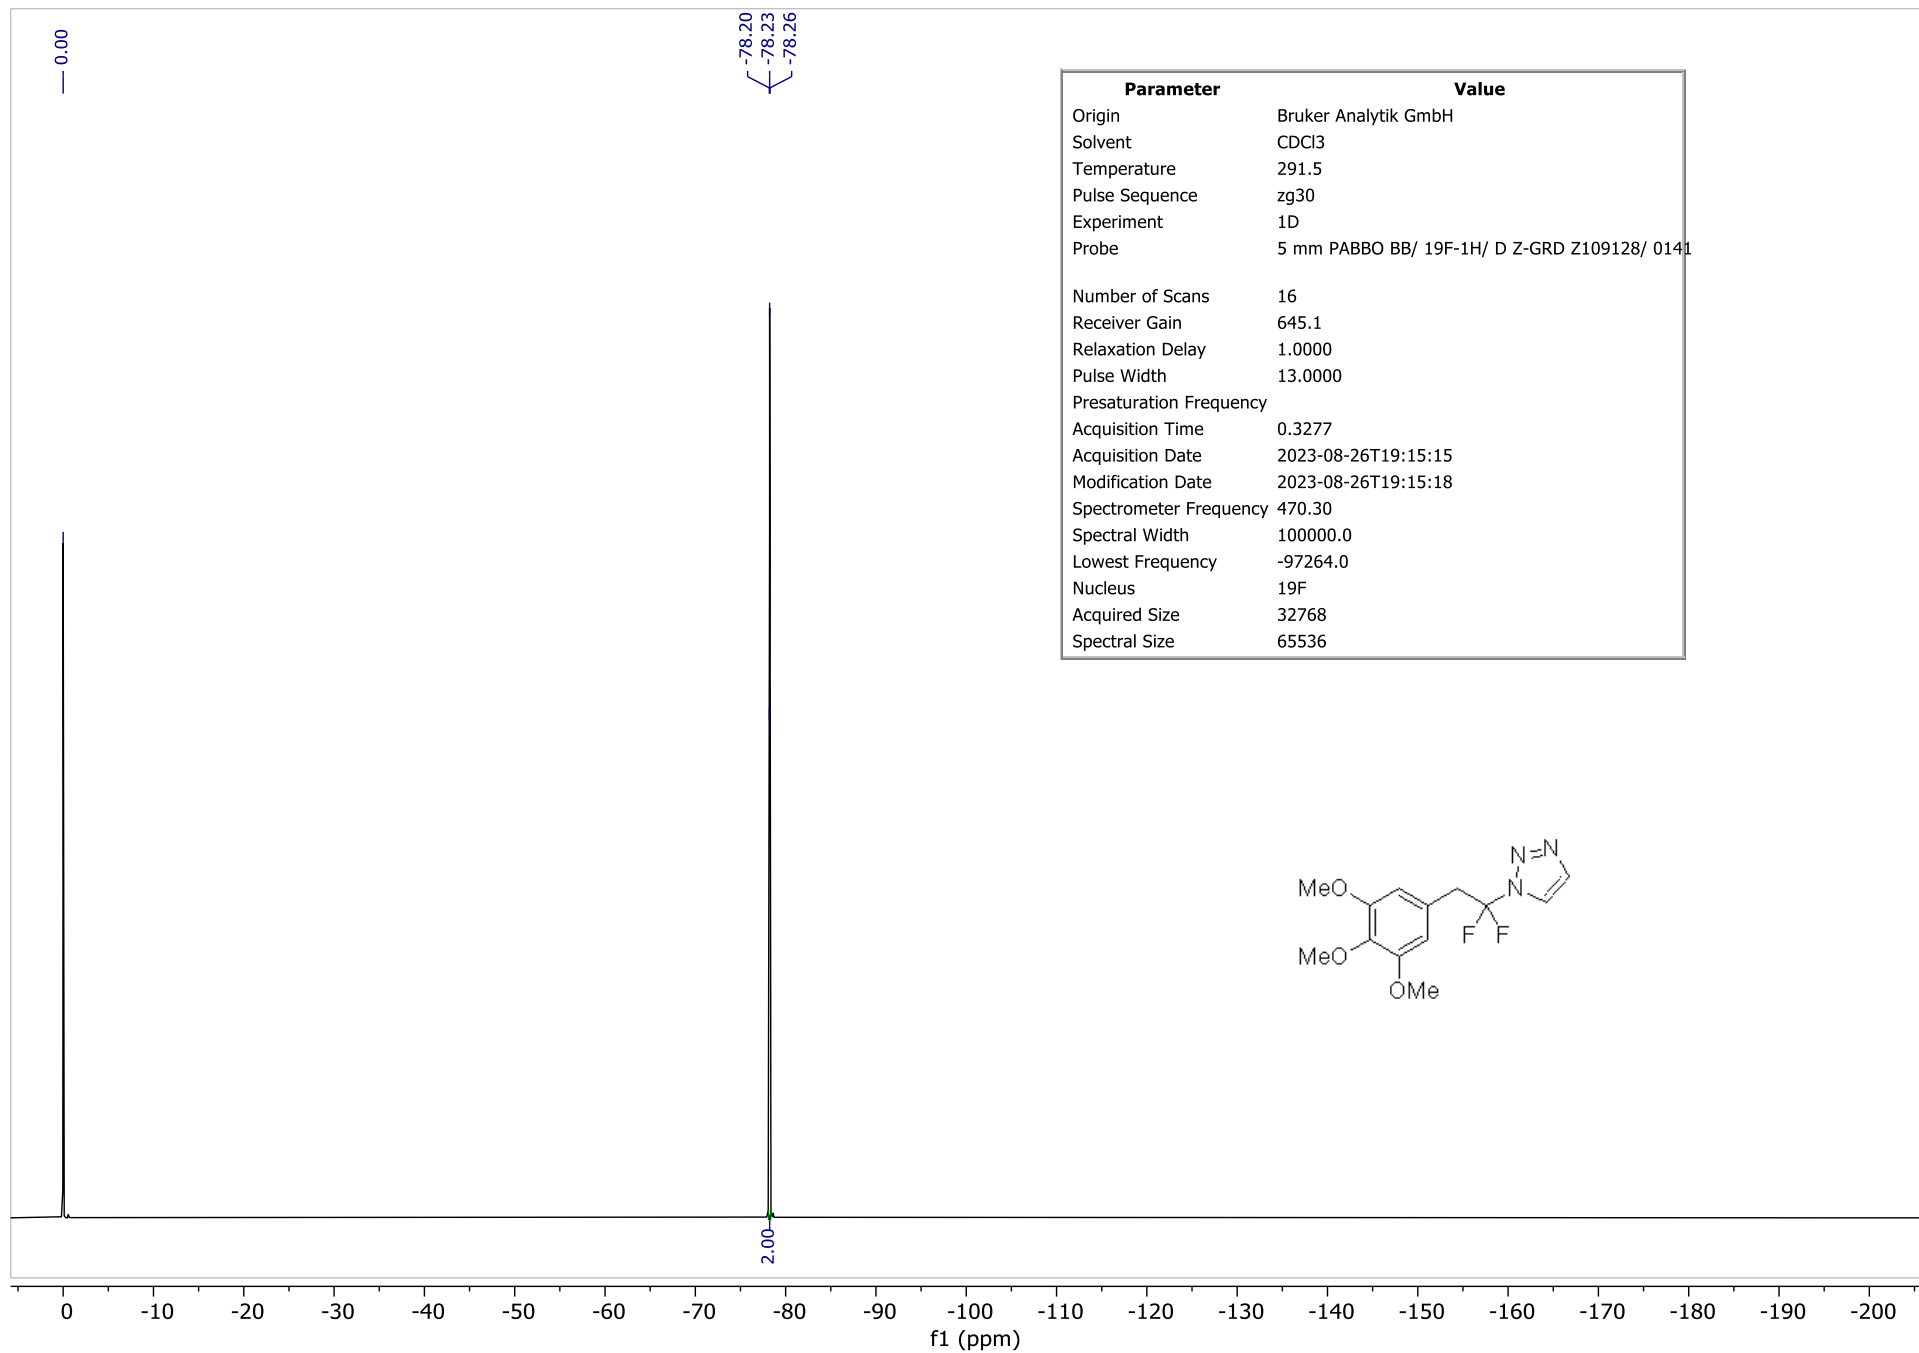

# NMR spectra for 1-(1,1-difluoro-2-(3,4,5-trimethoxyphenyl)ethyl)-1H-pyrazole (11a)

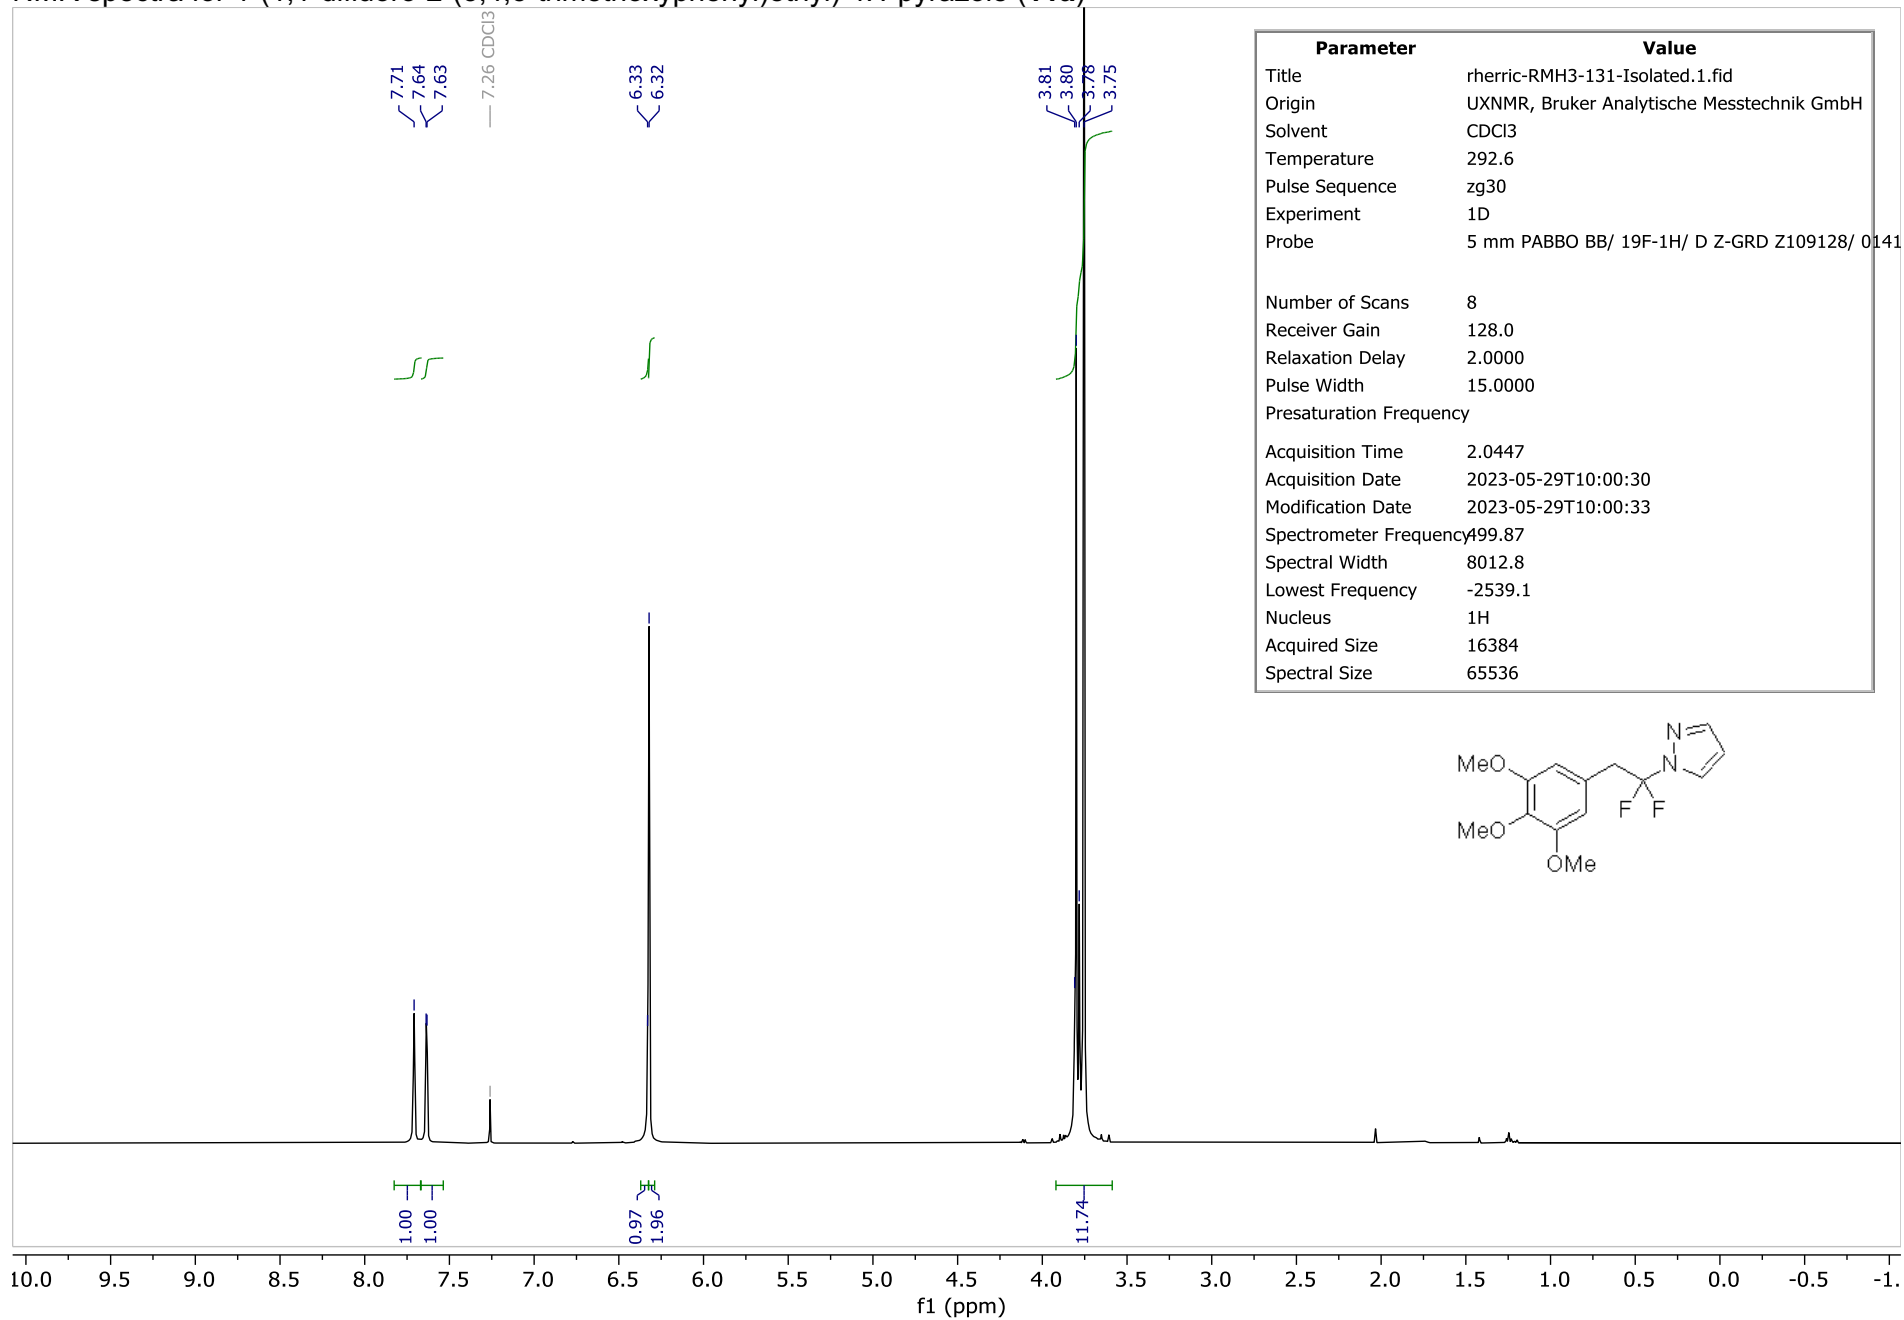

| Parameter               | Value                                        |
|-------------------------|----------------------------------------------|
| Title                   | rherric-RMH3-131-Isolated.1.fid              |
| Origin                  | UXNMR, Bruker Analytische Messtechnik GmbH   |
| Solvent                 | CDCl3                                        |
| Temperature             | 292.6                                        |
| Pulse Sequence          | zg30                                         |
| Experiment              | 1D                                           |
| Probe                   | 5 mm PABBO BB/ 19F-1H/ D Z-GRD Z109128/ 0141 |
| Number of Scans         | 8                                            |
| Receiver Gain           | 128.0                                        |
| Relaxation Delay        | 2.0000                                       |
| Pulse Width             | 15.0000                                      |
| Presaturation Frequency |                                              |
| Acquisition Time        | 2.0447                                       |
| Acquisition Date        | 2023-05-29T10:00:30                          |
| Modification Date       | 2023-05-29T10:00:33                          |
| Spectrometer Frequency  | 499.87                                       |
| Spectral Width          | 8012.8                                       |
| Lowest Frequency        | -2539.1                                      |
| Nucleus                 | 1H                                           |
| Acquired Size           | 16384                                        |
| Spectral Size           | 65536                                        |



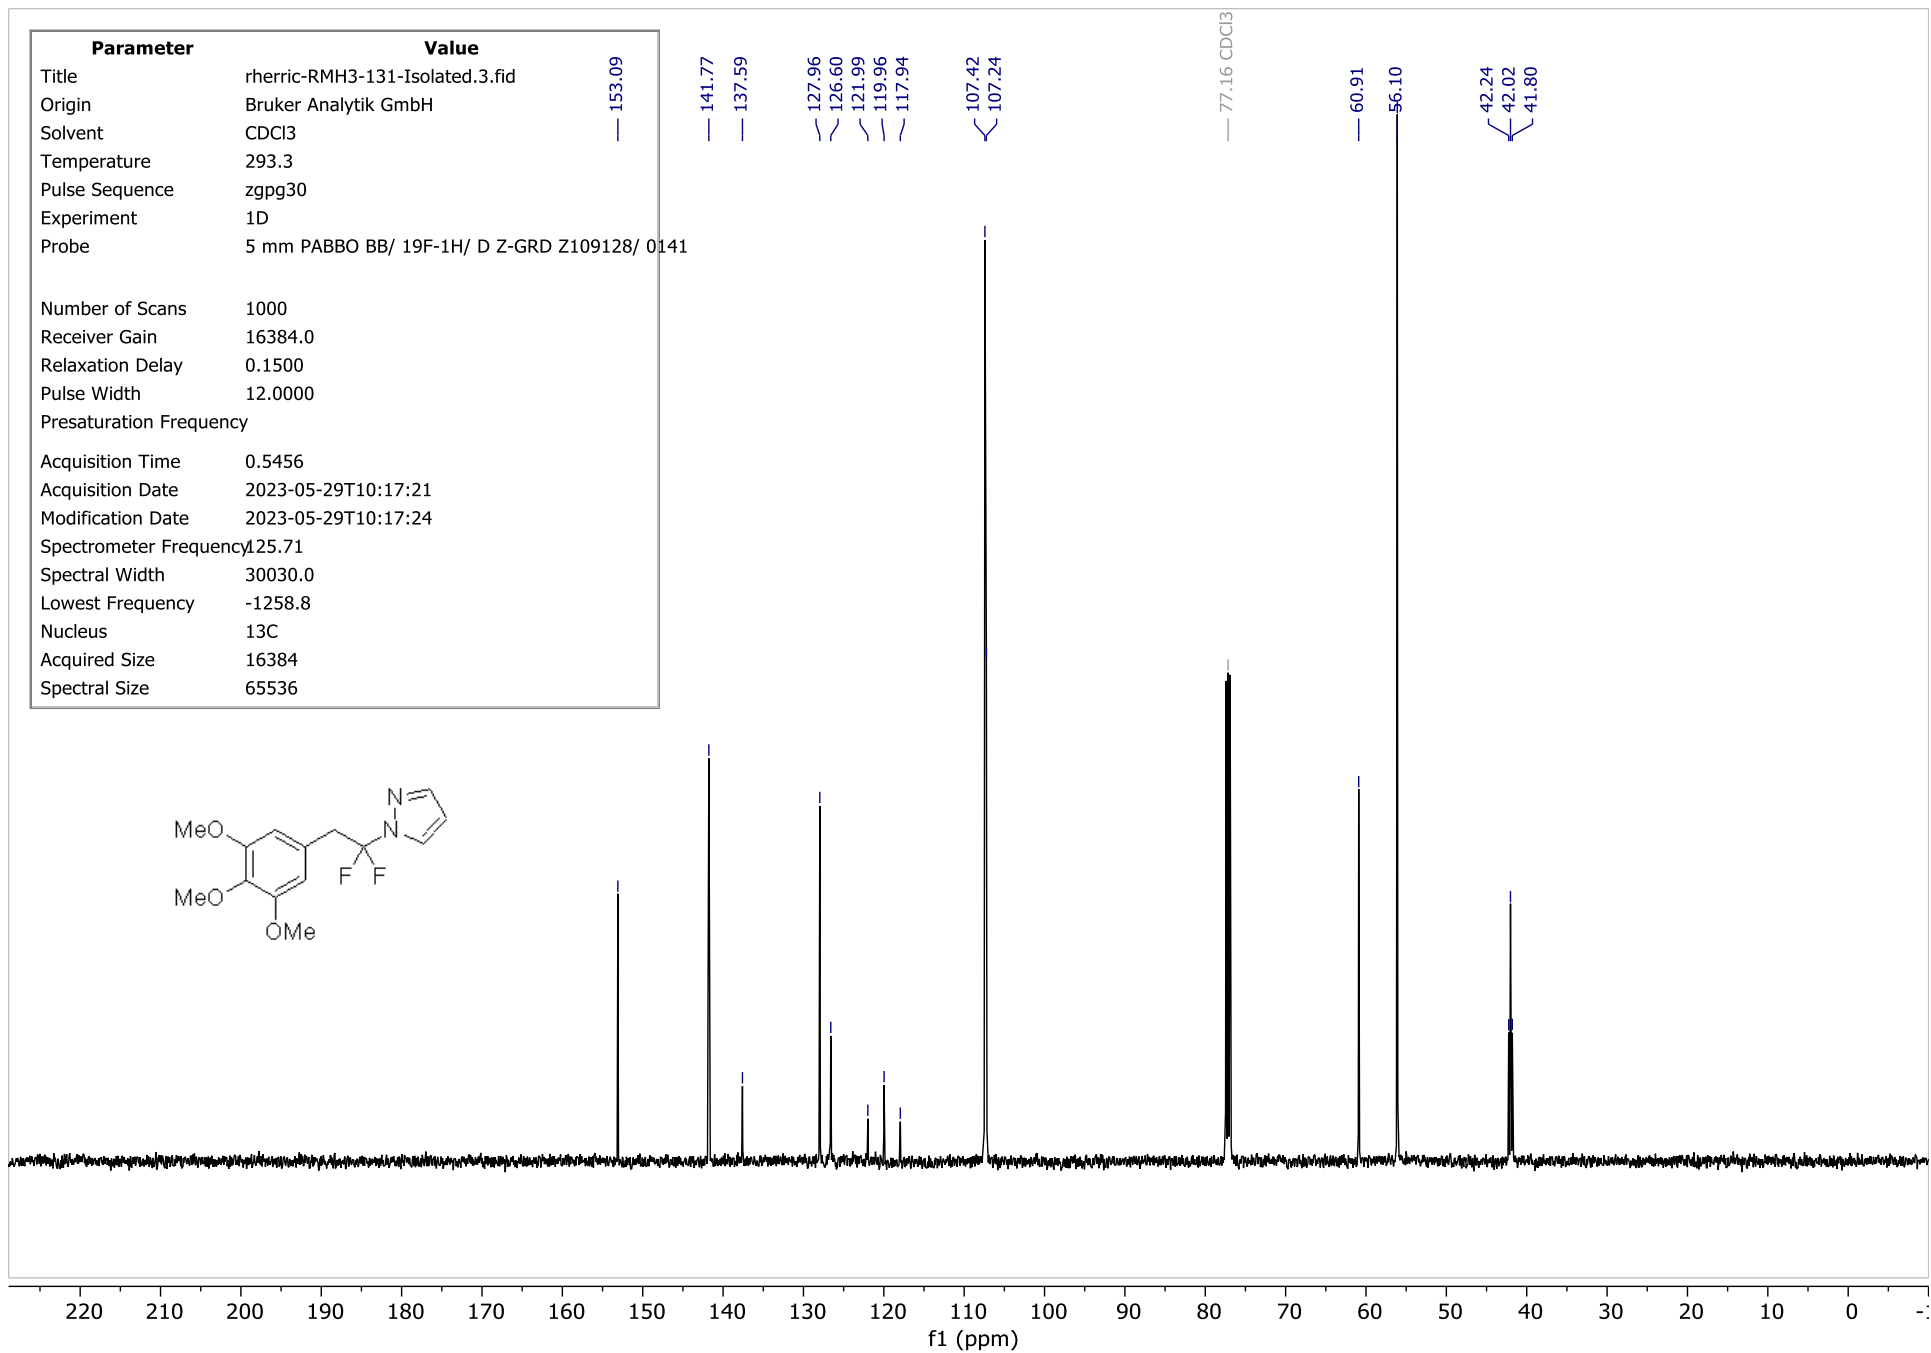

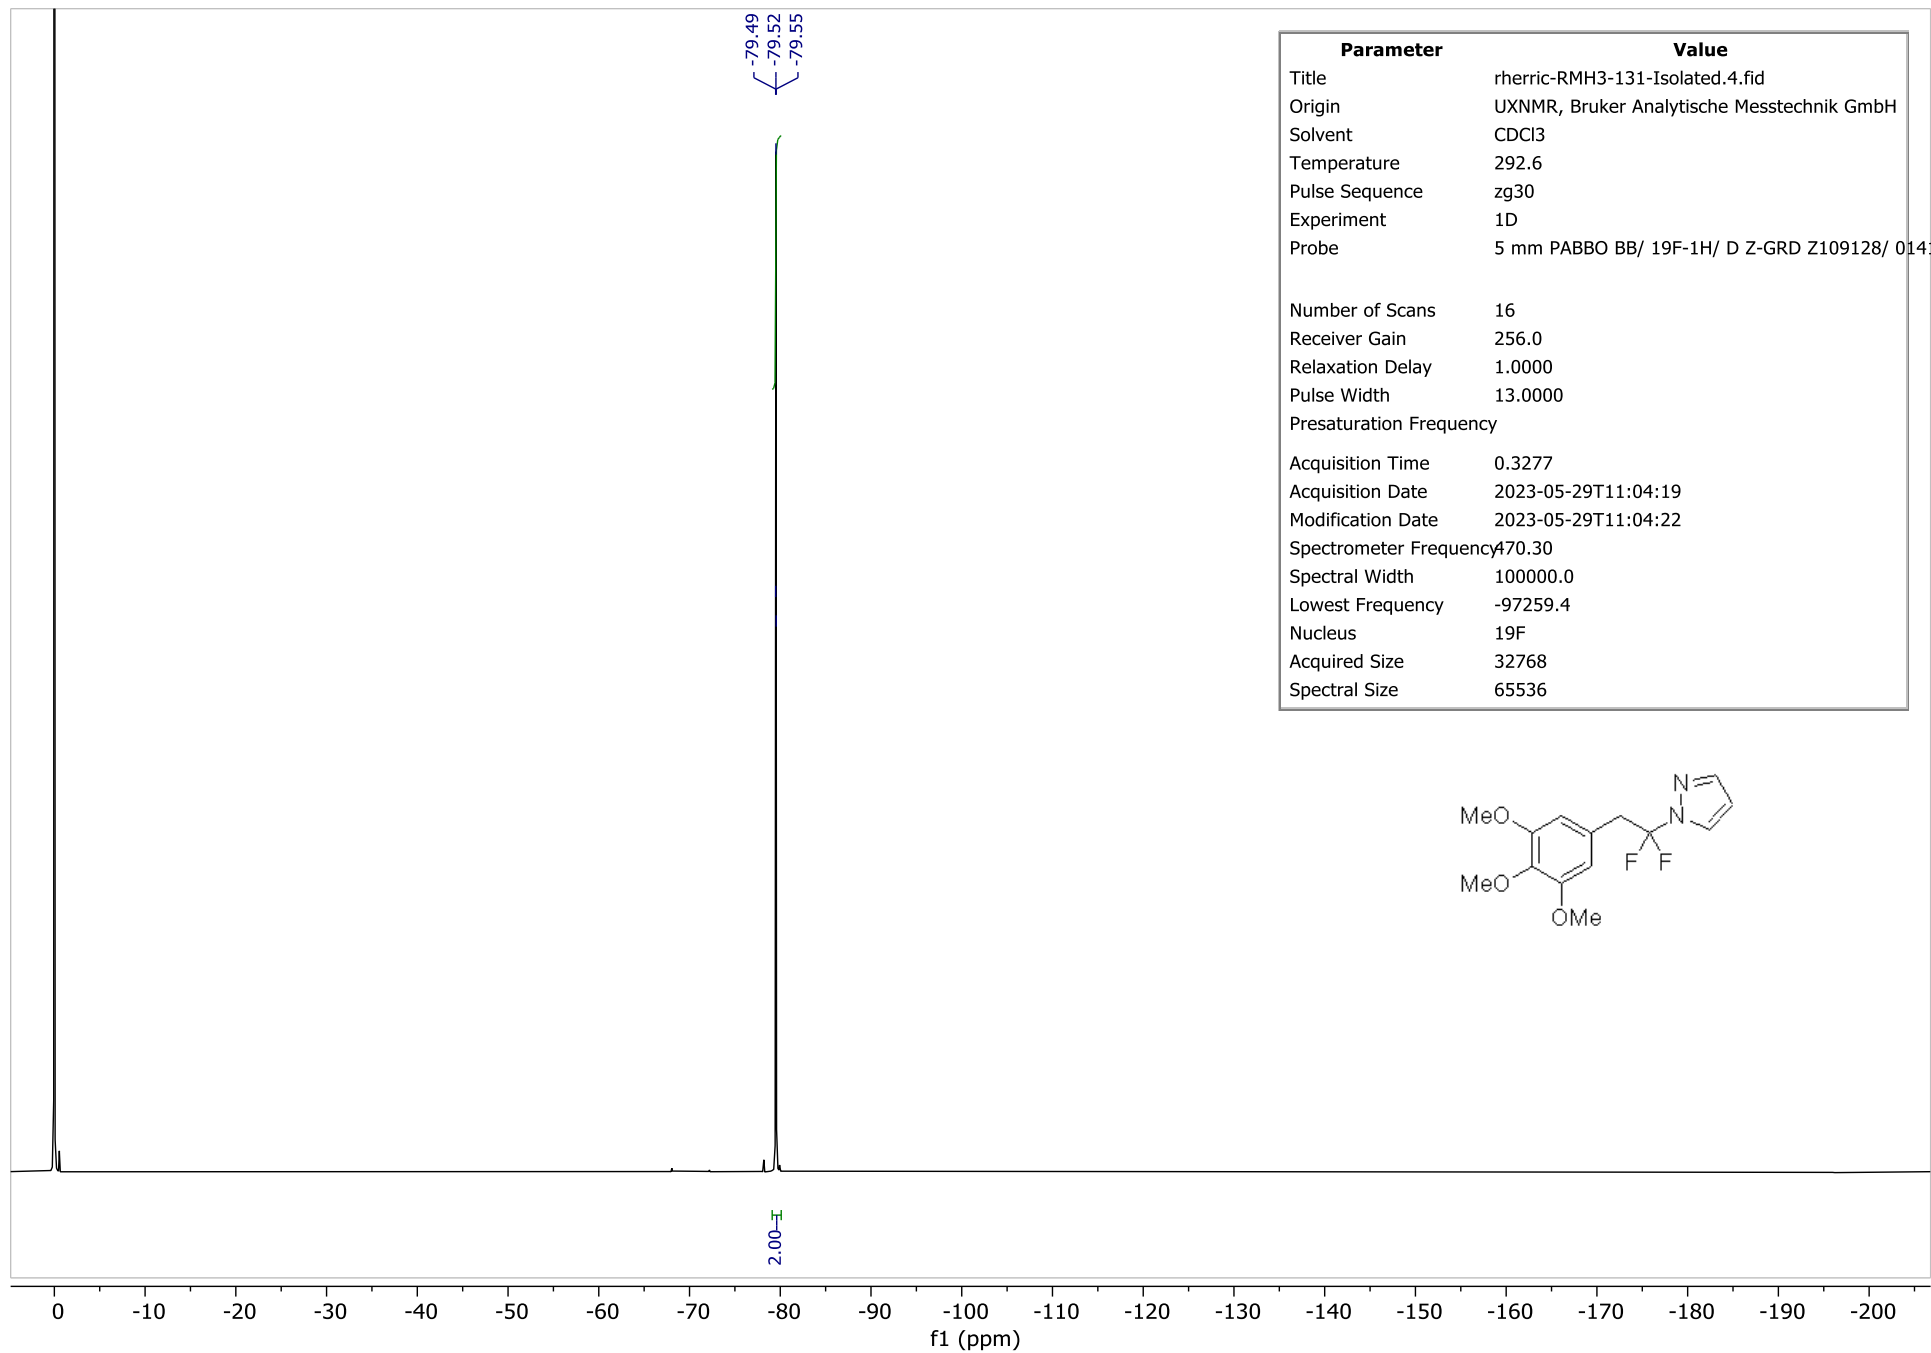

# NMR spectra for 4-(2,2-difluoro-2-(1*H*-pyrazol-1-yl)ethyl)-1-phenyl-1*H*-pyrazole (**11b**)

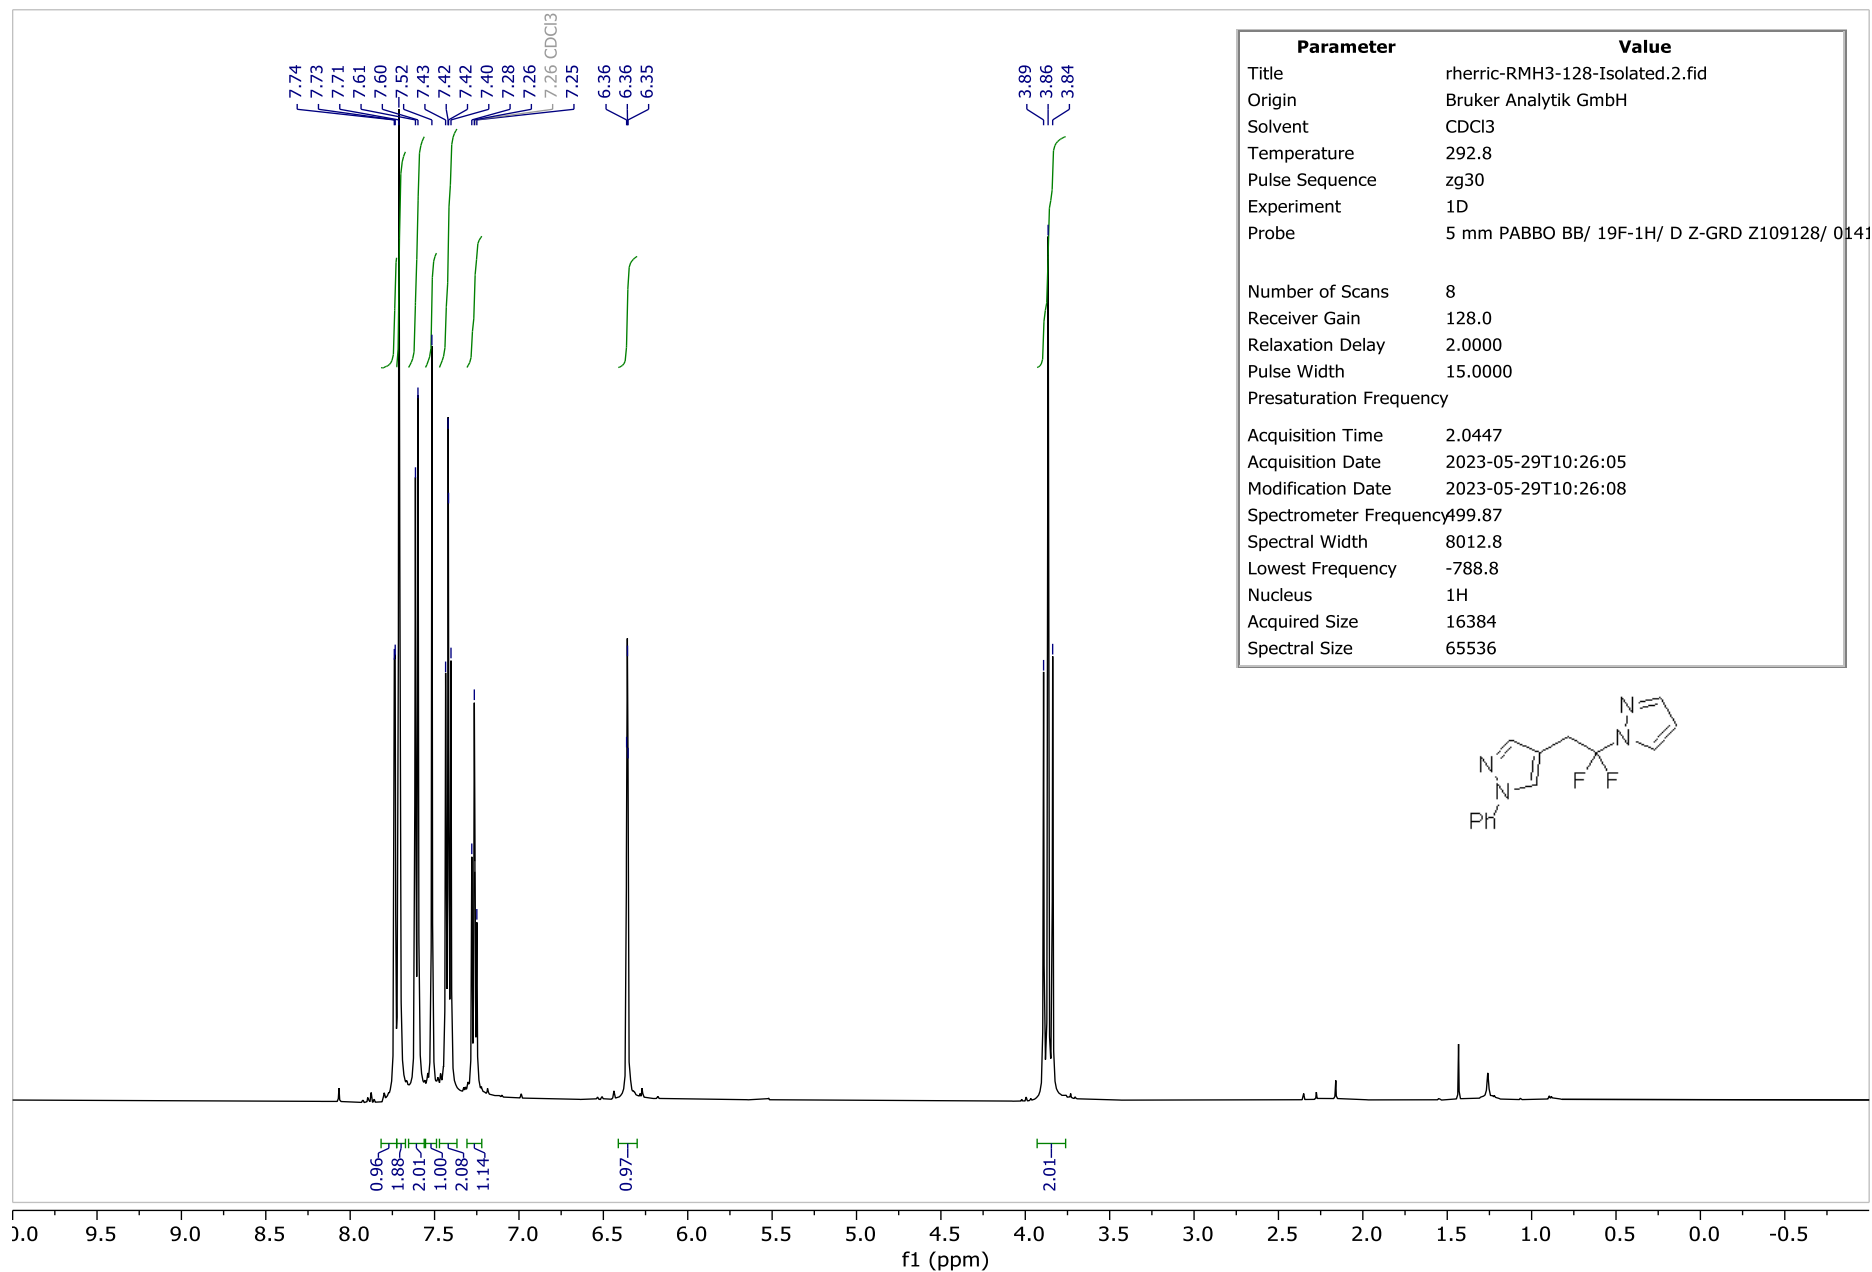

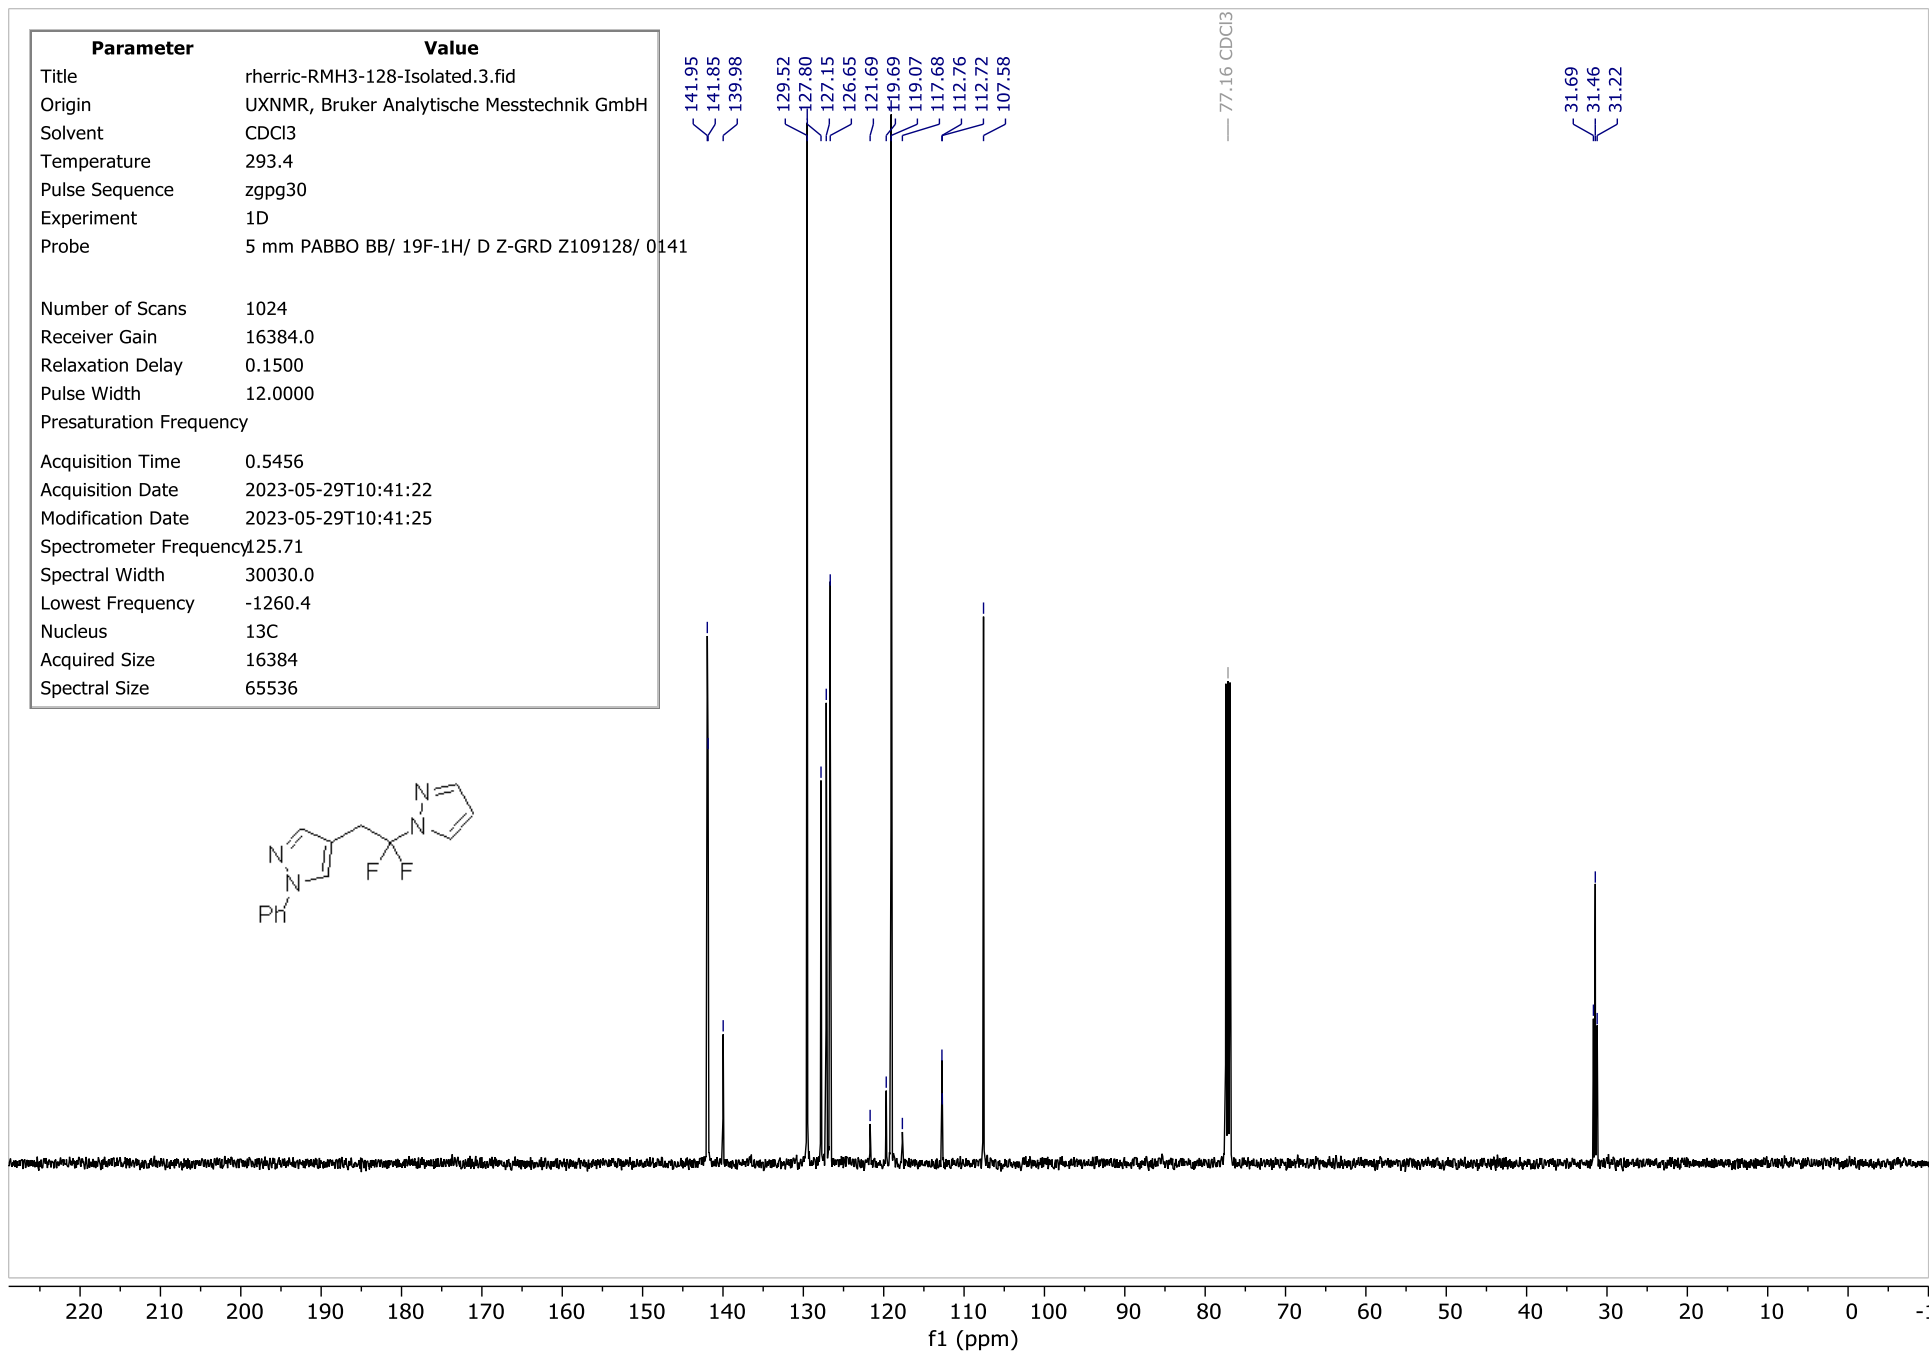

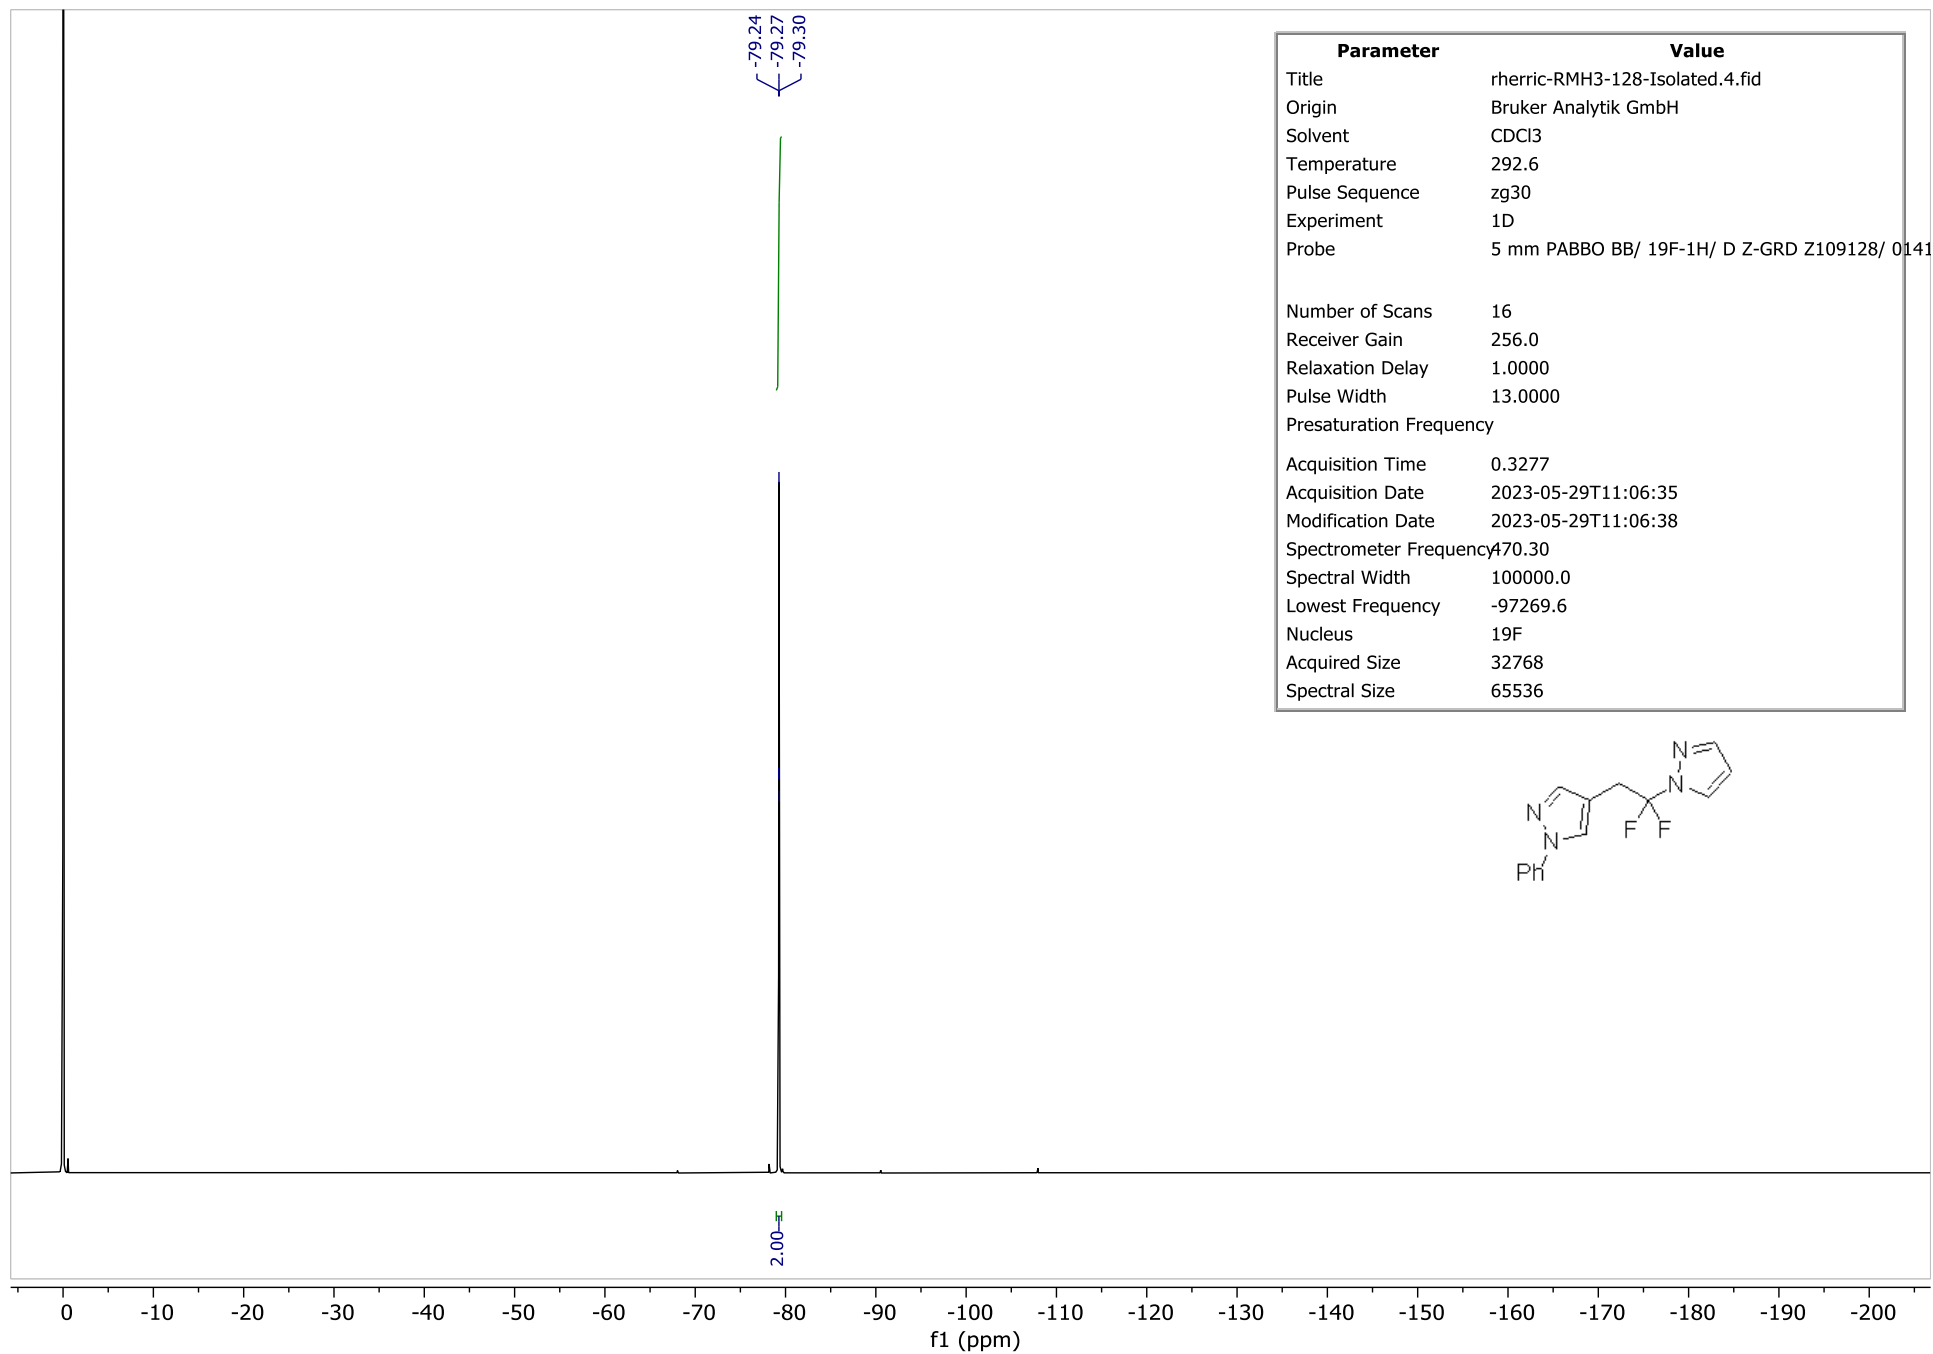

| Parameter               | Value                                        |
|-------------------------|----------------------------------------------|
| Title                   | rherric-RMH3-128-Isolated.4.fid              |
| Origin                  | Bruker Analytik GmbH                         |
| Solvent                 | CDCl3                                        |
| Temperature             | 292.6                                        |
| Pulse Sequence          | zg30                                         |
| Experiment              | 1D                                           |
| Probe                   | 5 mm PABBO BB/ 19F-1H/ D Z-GRD Z109128/ 0141 |
| Number of Scans         | 16                                           |
| Receiver Gain           | 256.0                                        |
| Relaxation Delay        | 1.0000                                       |
| Pulse Width             | 13.0000                                      |
| Presaturation Frequency |                                              |
| Acquisition Time        | 0.3277                                       |
| Acquisition Date        | 2023-05-29T11:06:35                          |
| Modification Date       | 2023-05-29T11:06:38                          |
| Spectrometer Frequency  | 470.30                                       |
| Spectral Width          | 100000.0                                     |
| Lowest Frequency        | -97269.6                                     |
| Nucleus                 | 19F                                          |
| Acquired Size           | 32768                                        |
| Spectral Size           | 65536                                        |

NMR spectra for 1-(2-(dibenzo[*b,d*]thiophen-3-yl)-1,1-difluoroethyl)-1*H*-pyrazole (**11c**)

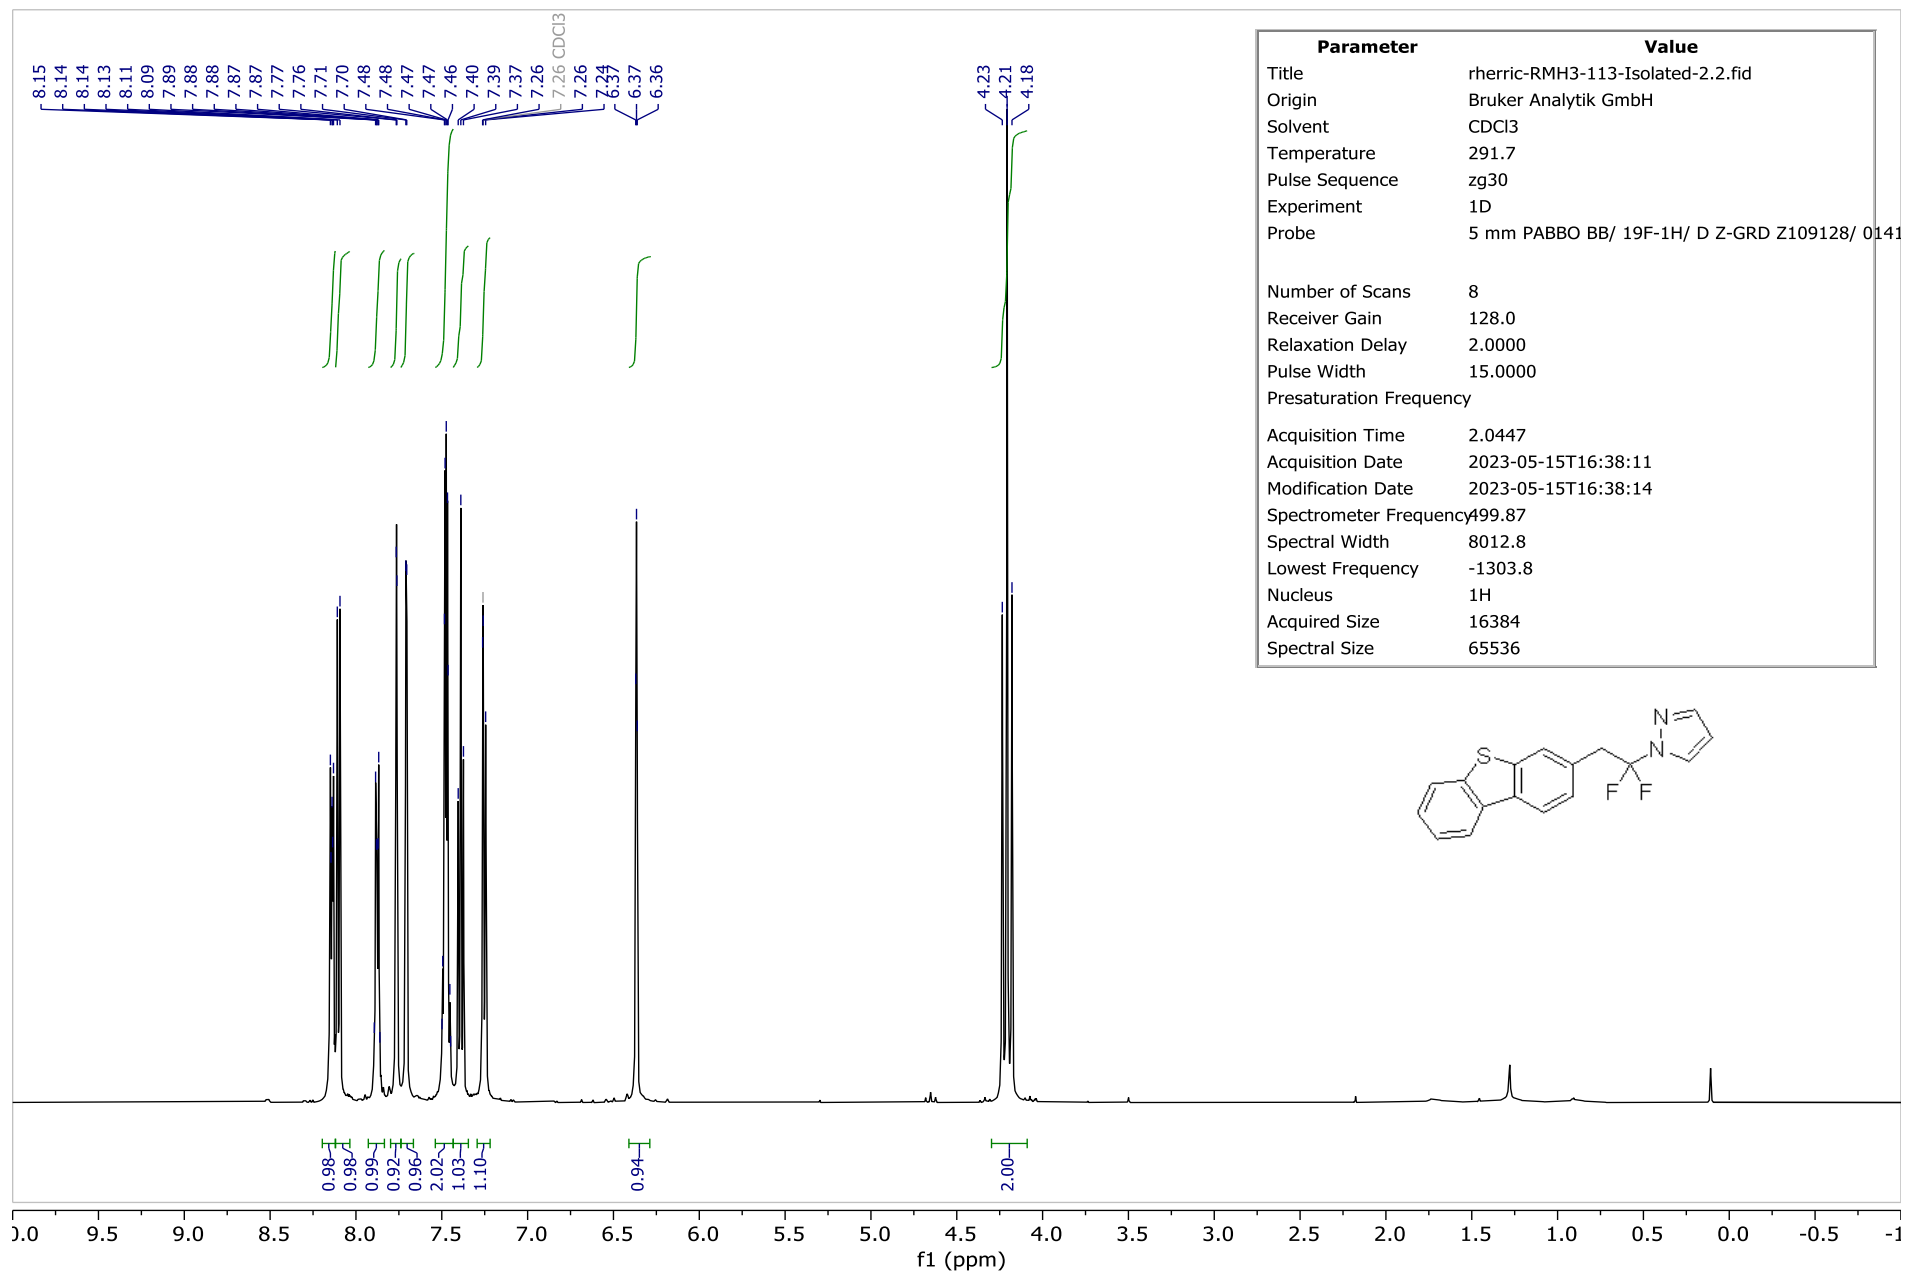

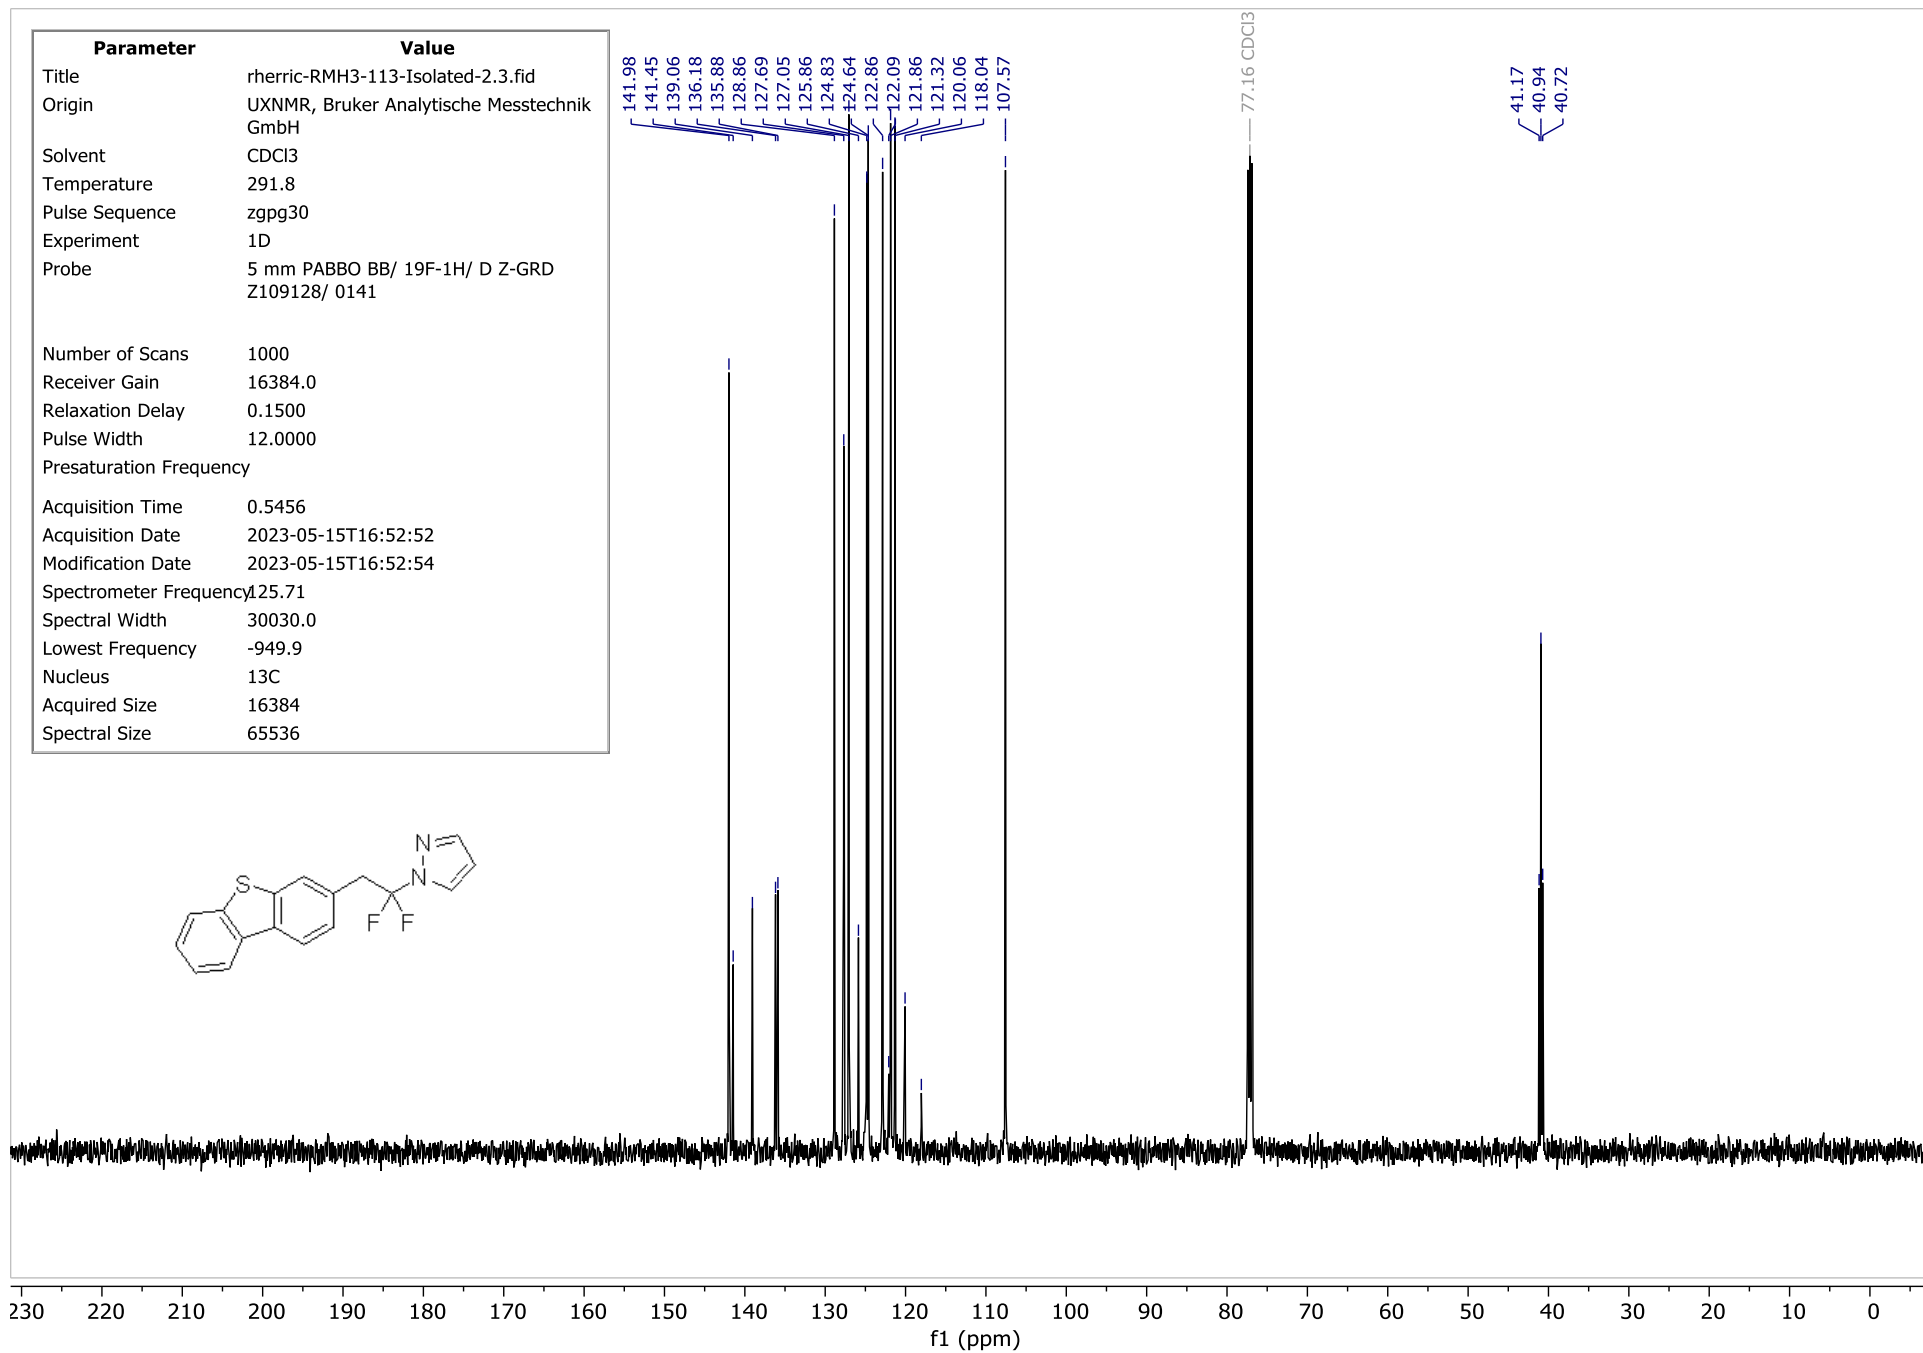

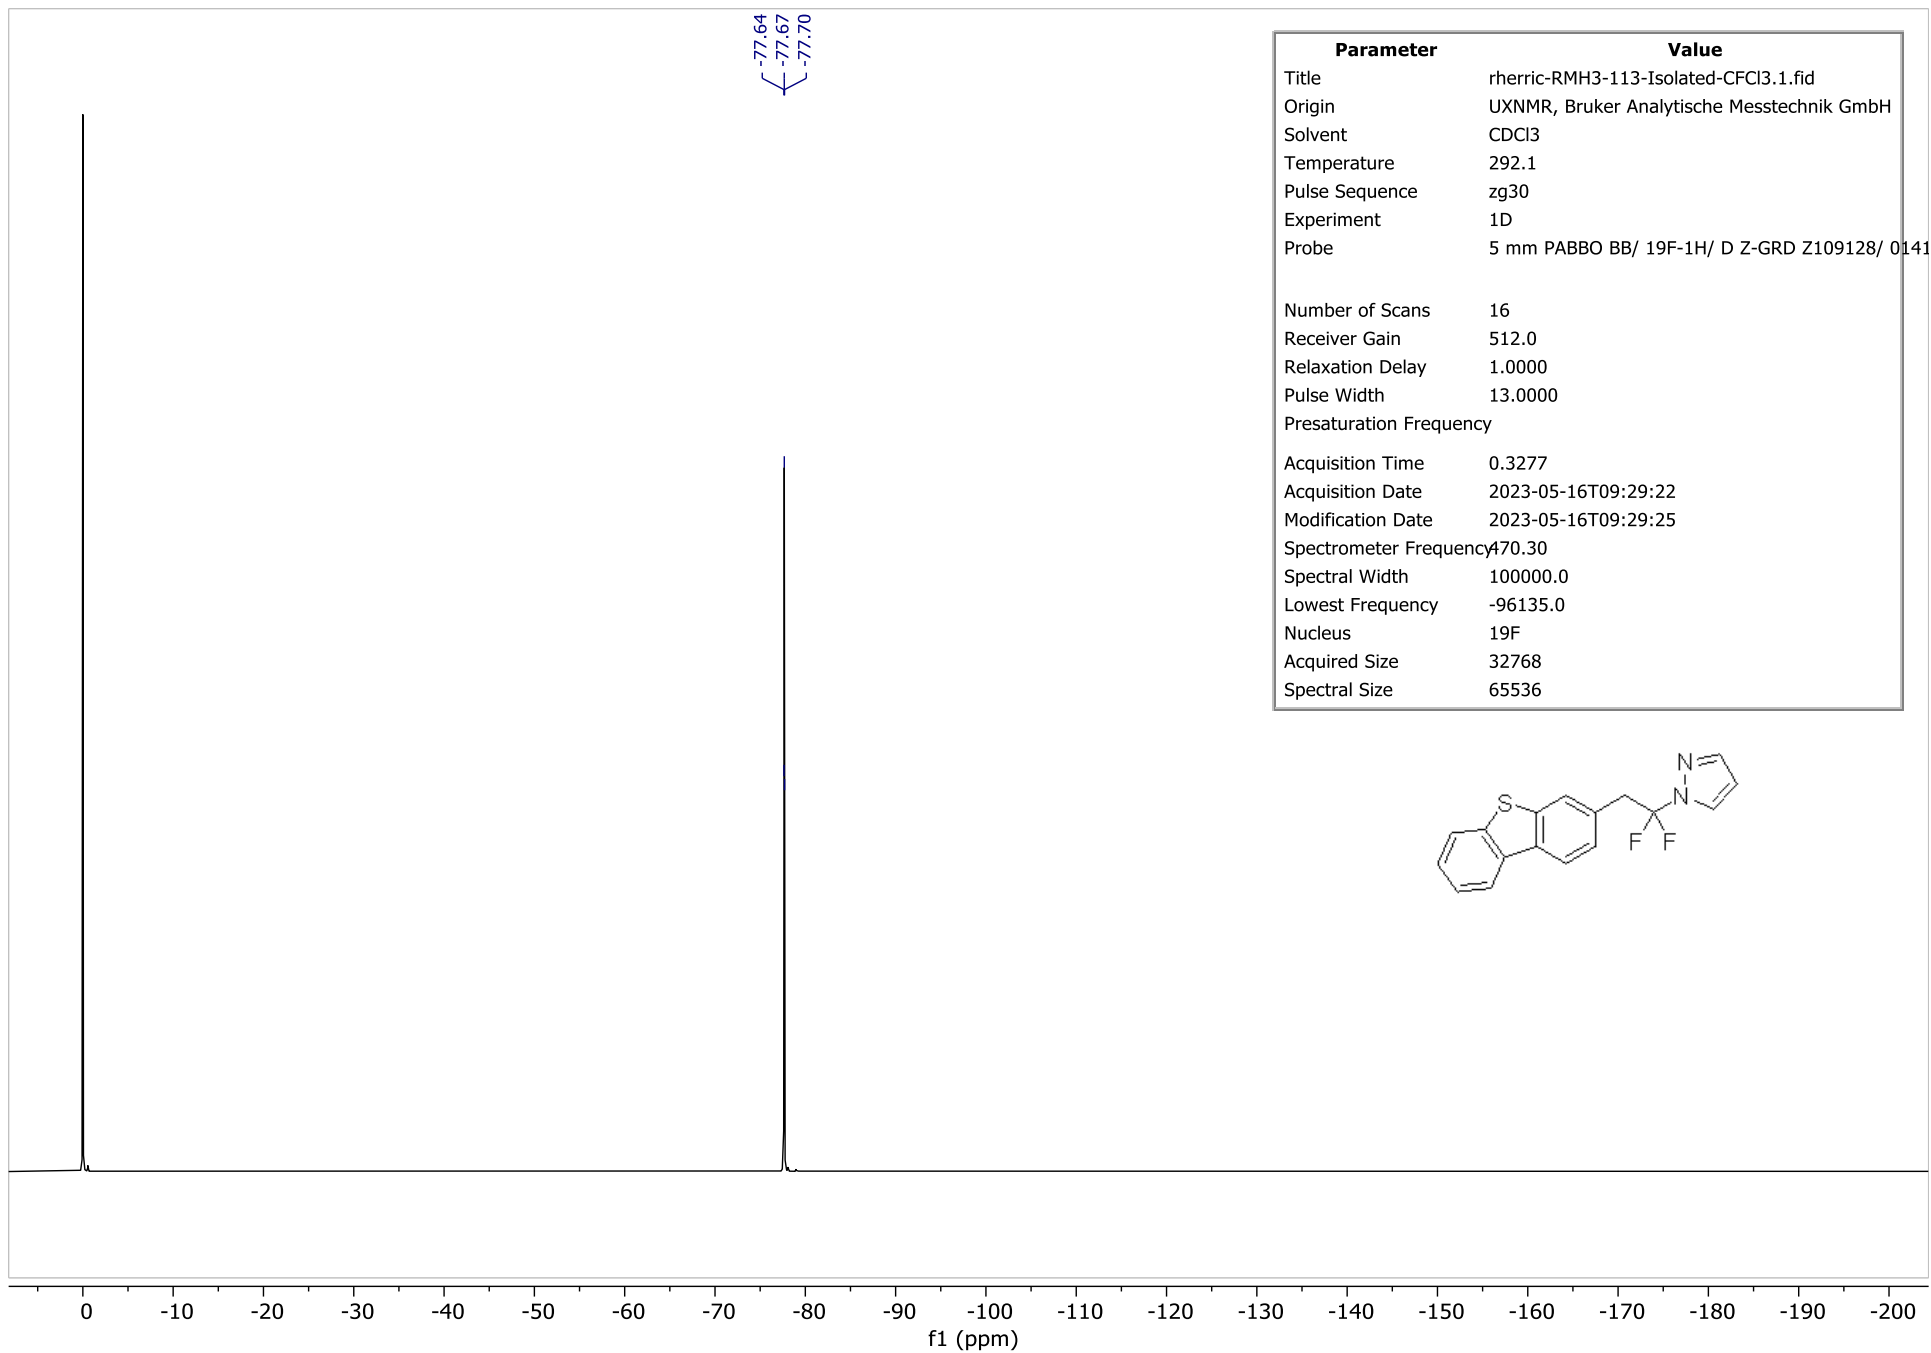



# NMR spectra for 1-(2-(benzofuran-2-yl)-1,1-difluoroethyl)-1H-pyrazole (11d)

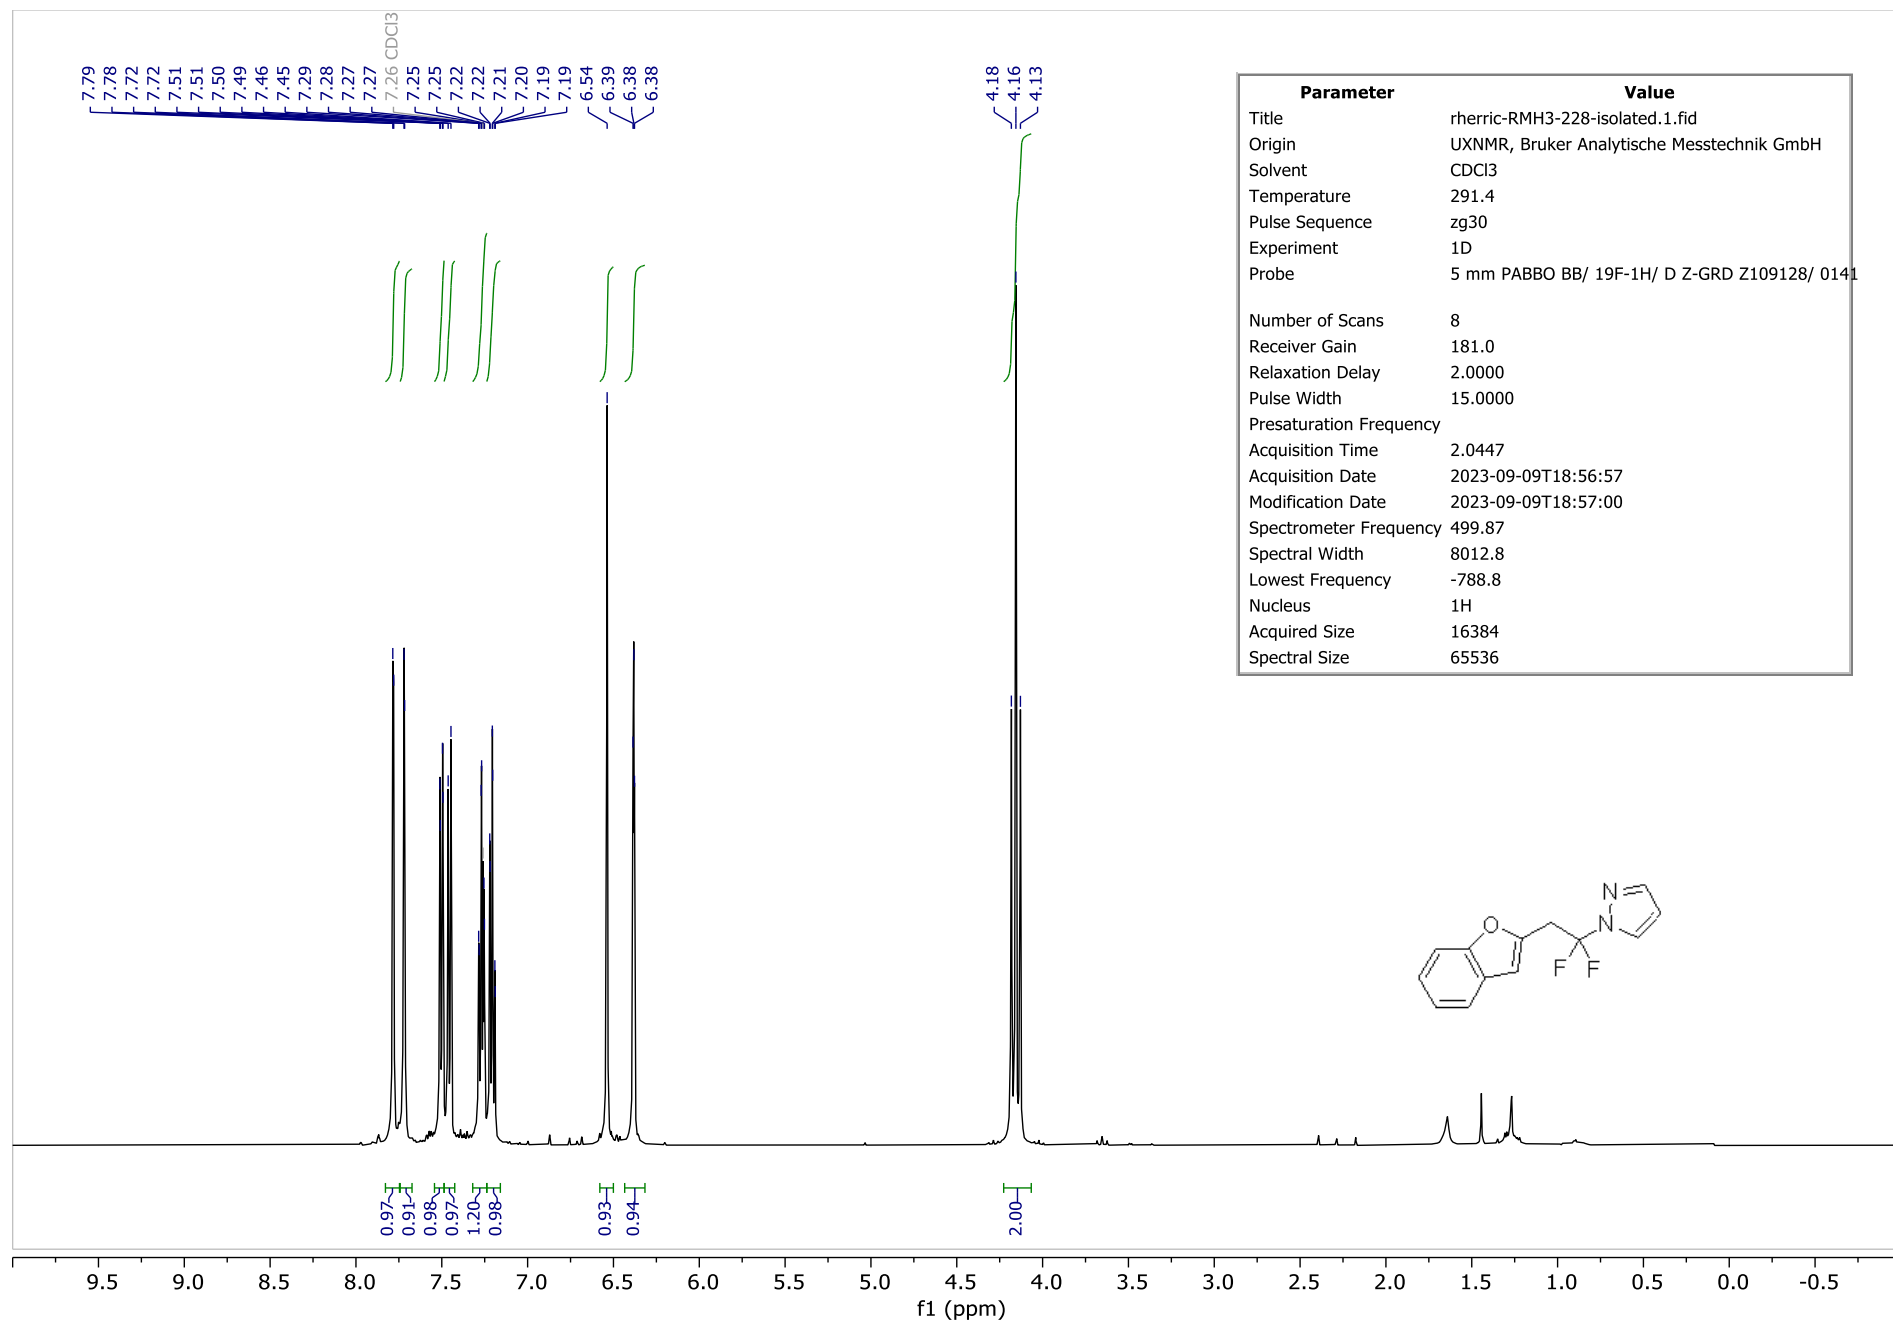

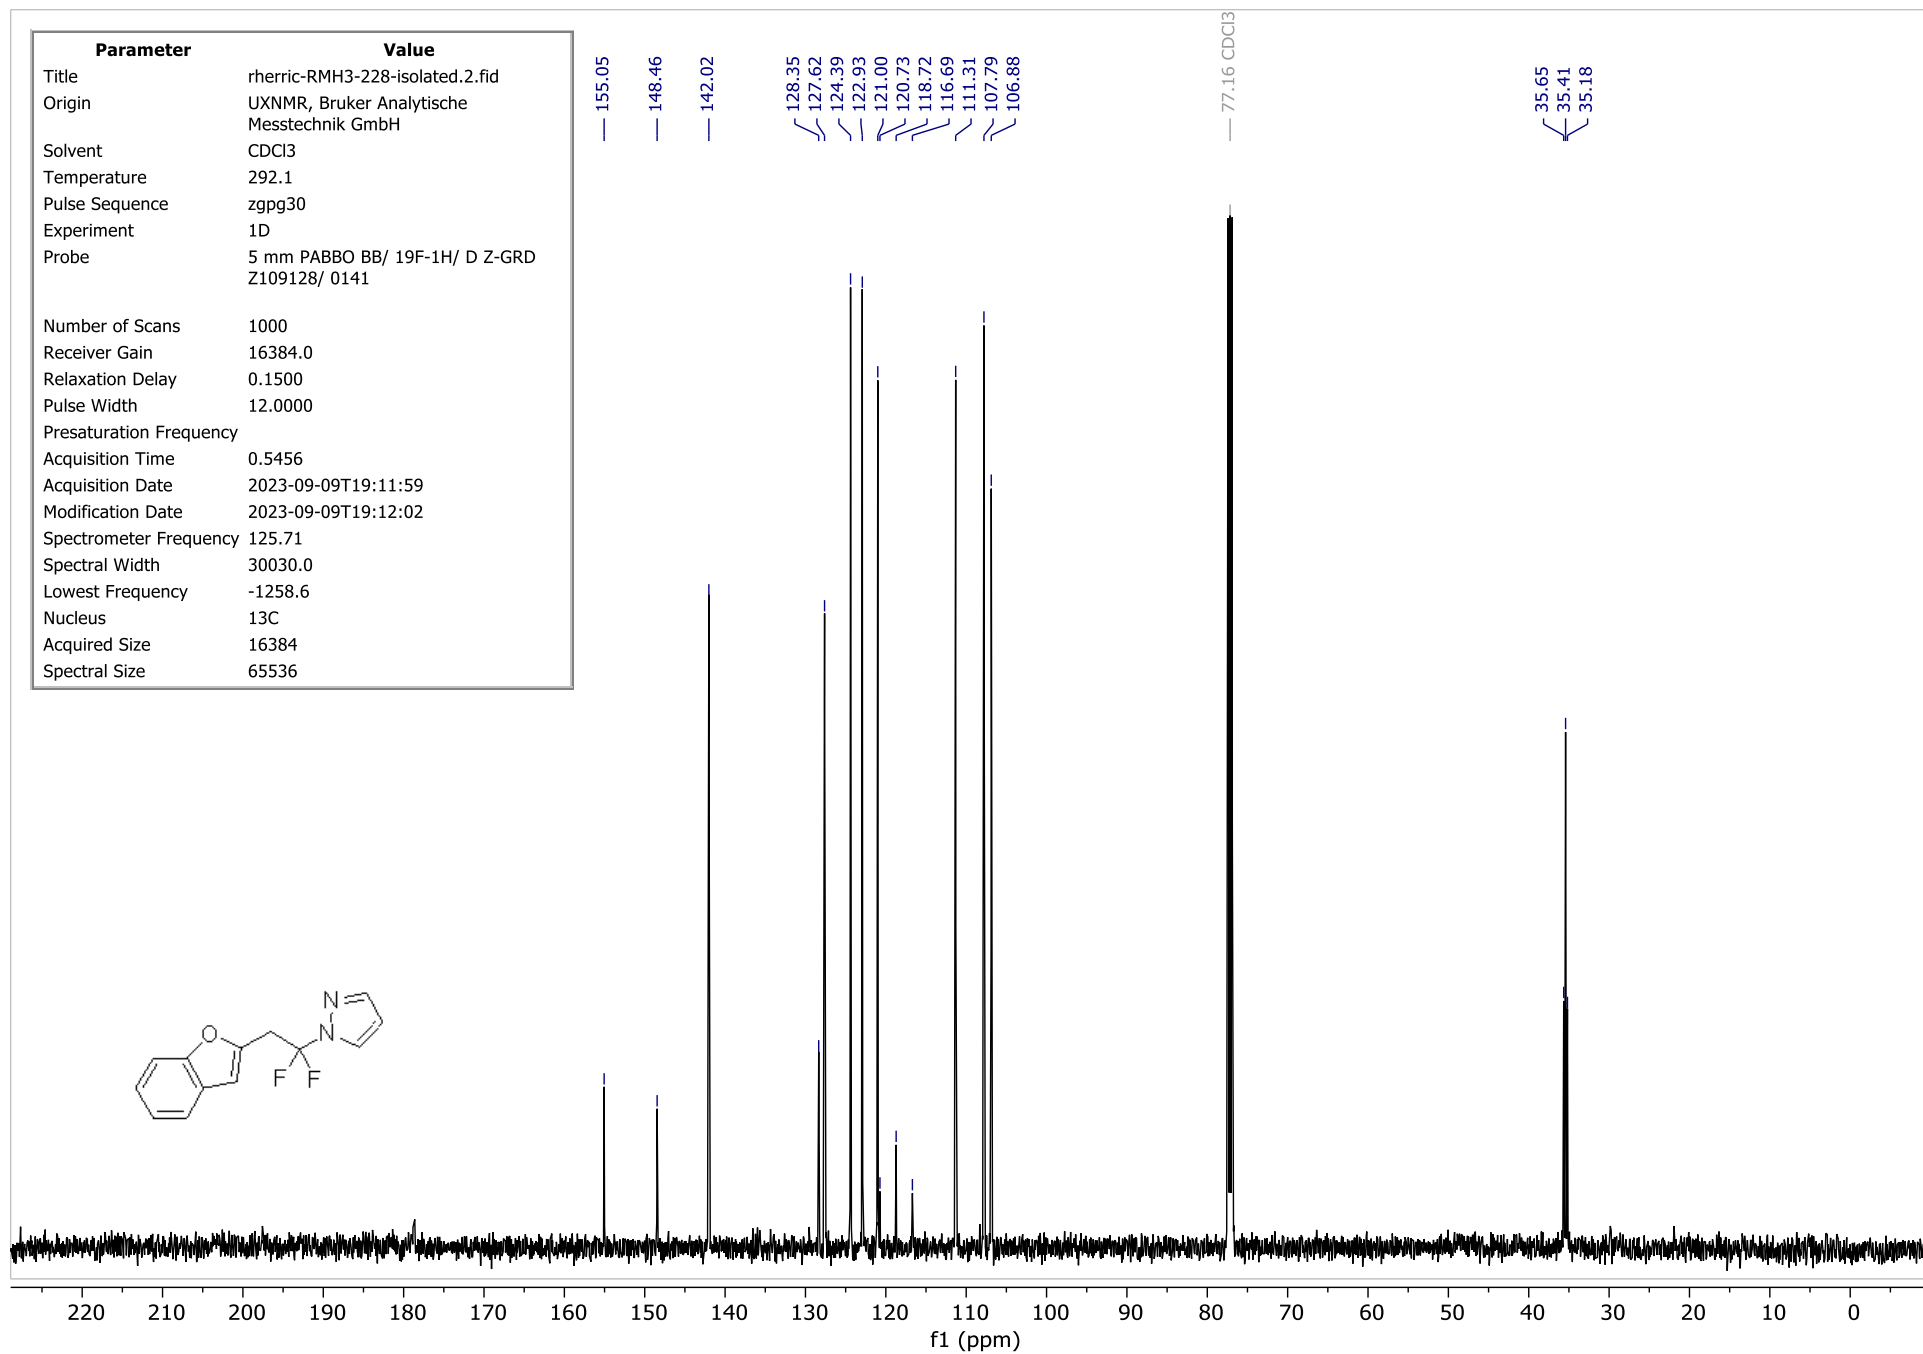

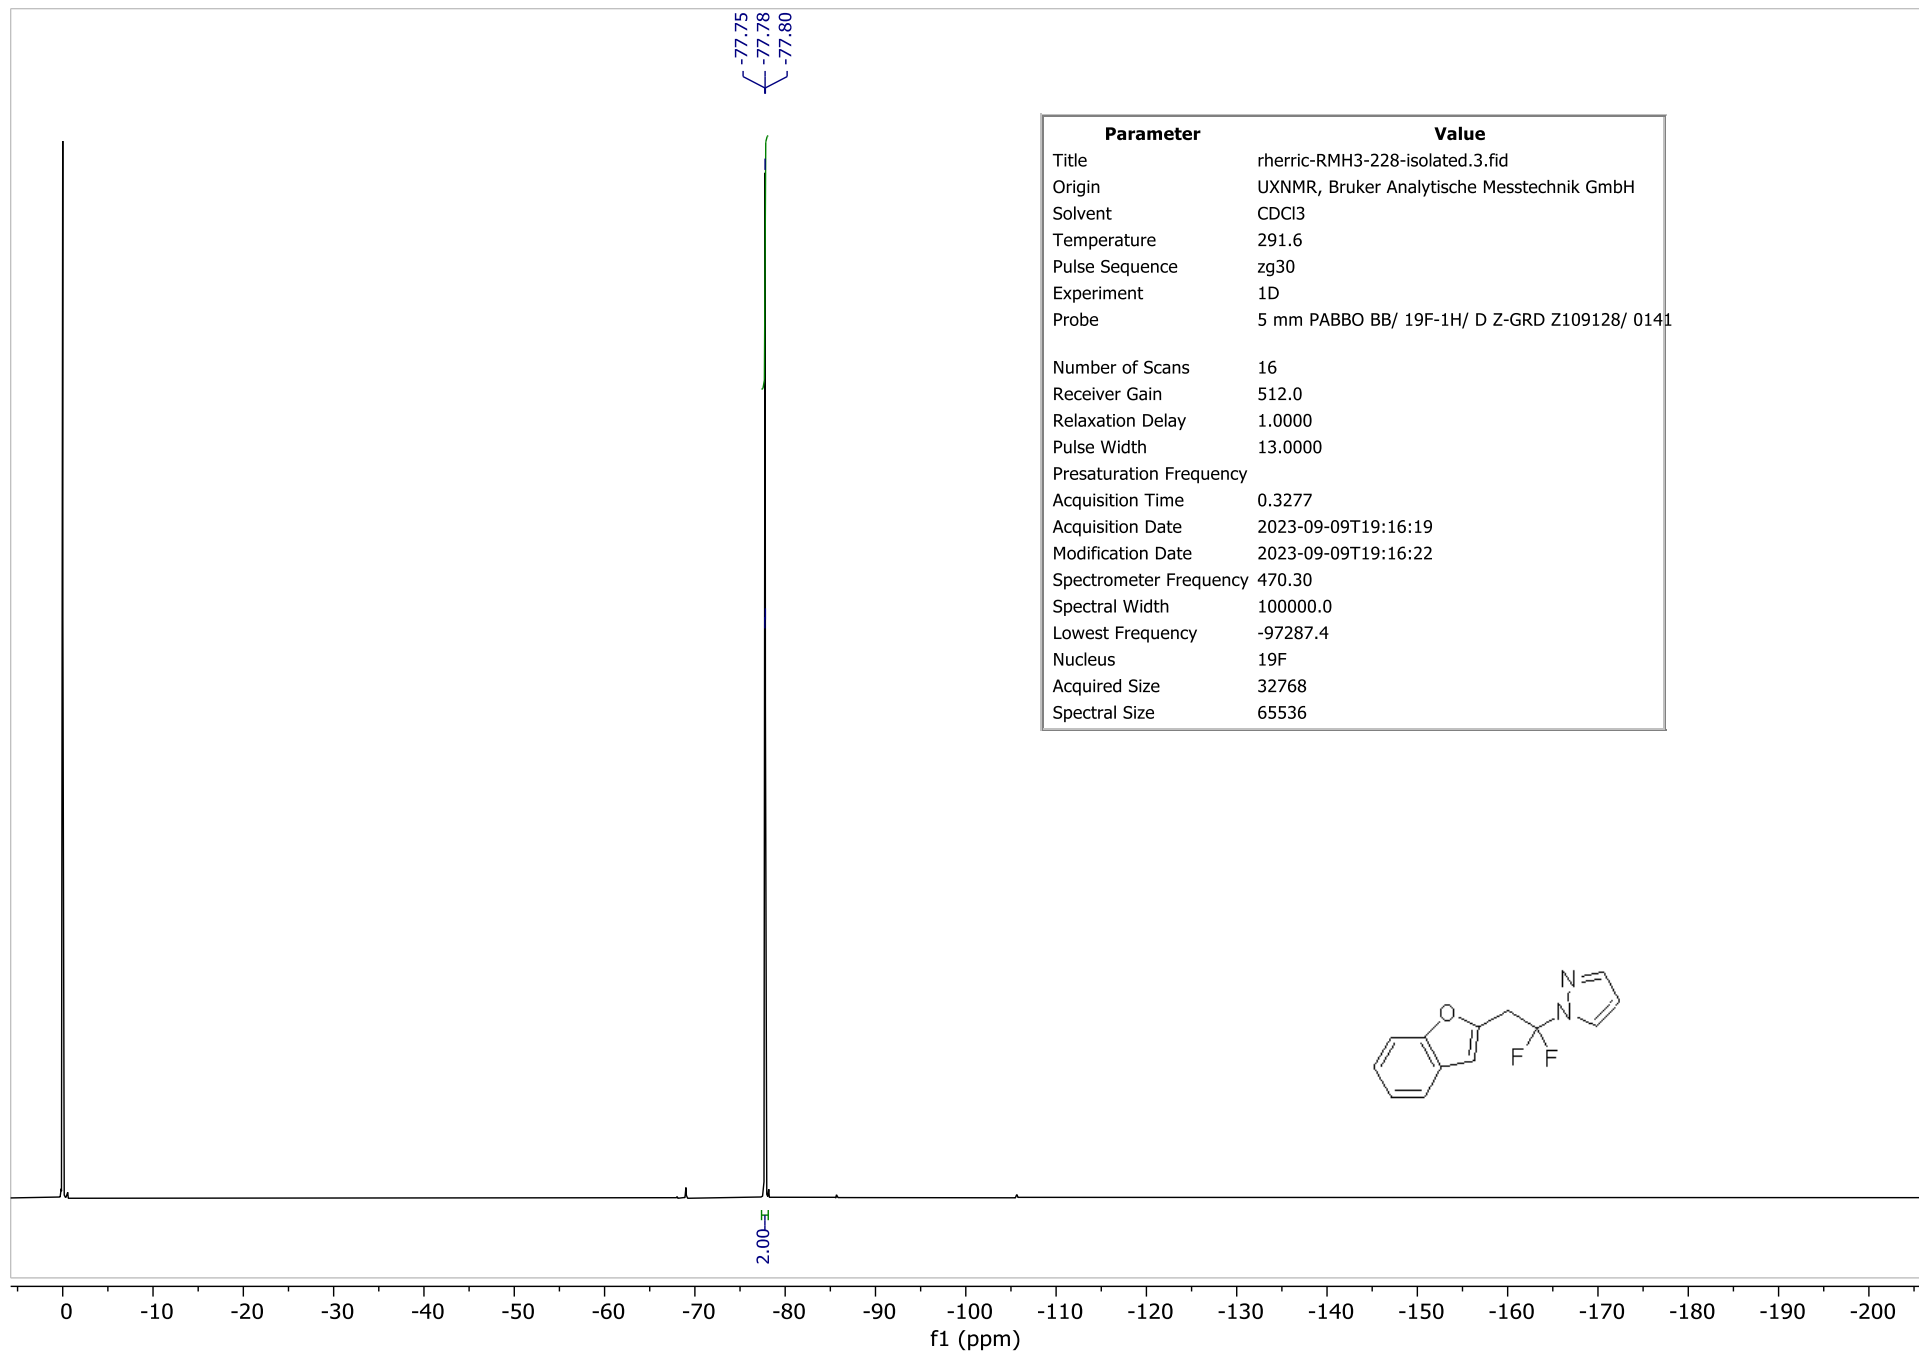

NMR spectra for 3-(2,2-difluoro-2-(1*H*-pyrazol-1-yl)ethyl)-1-(phenylsulfonyl)-1*H*-indole (**11e**)

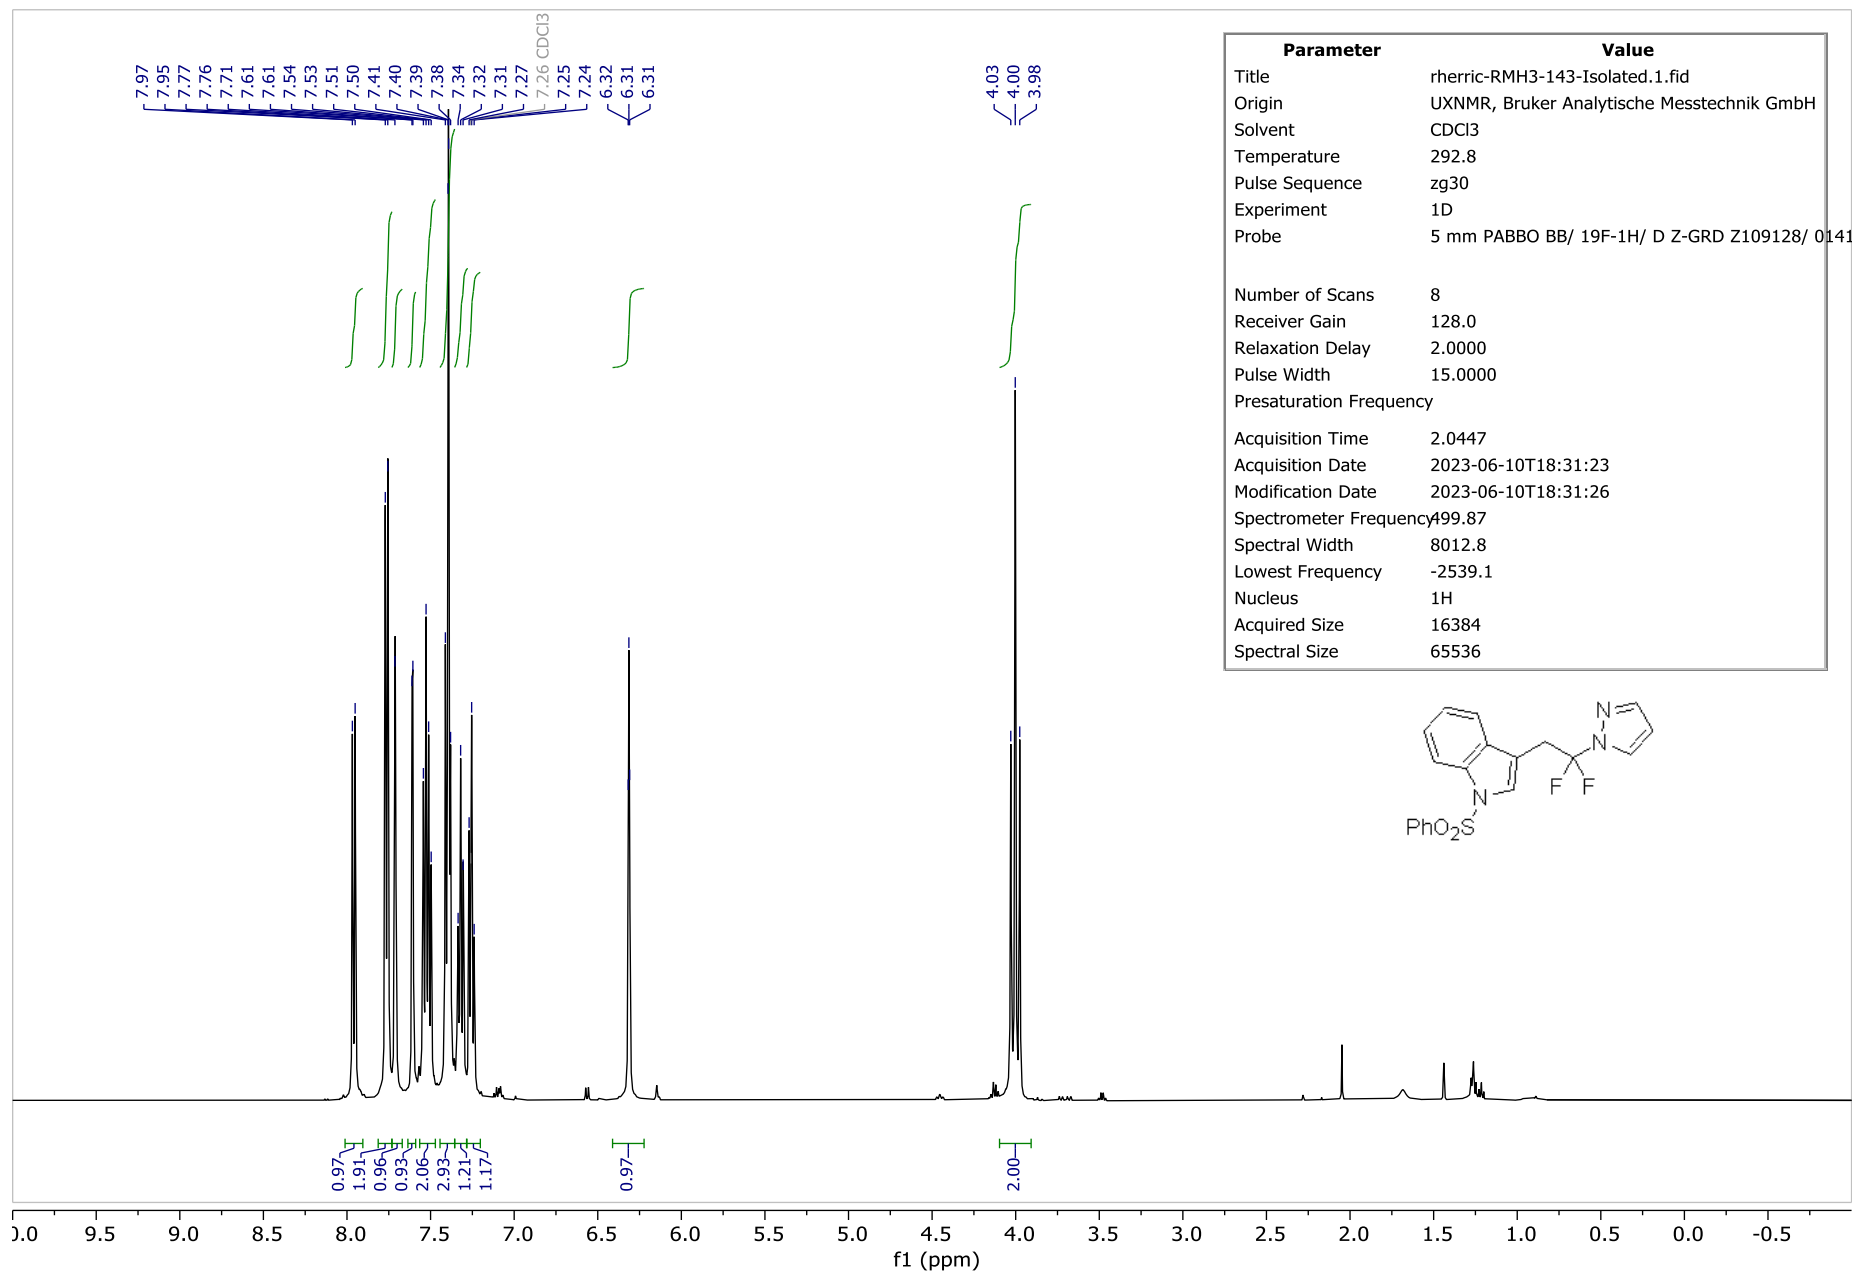

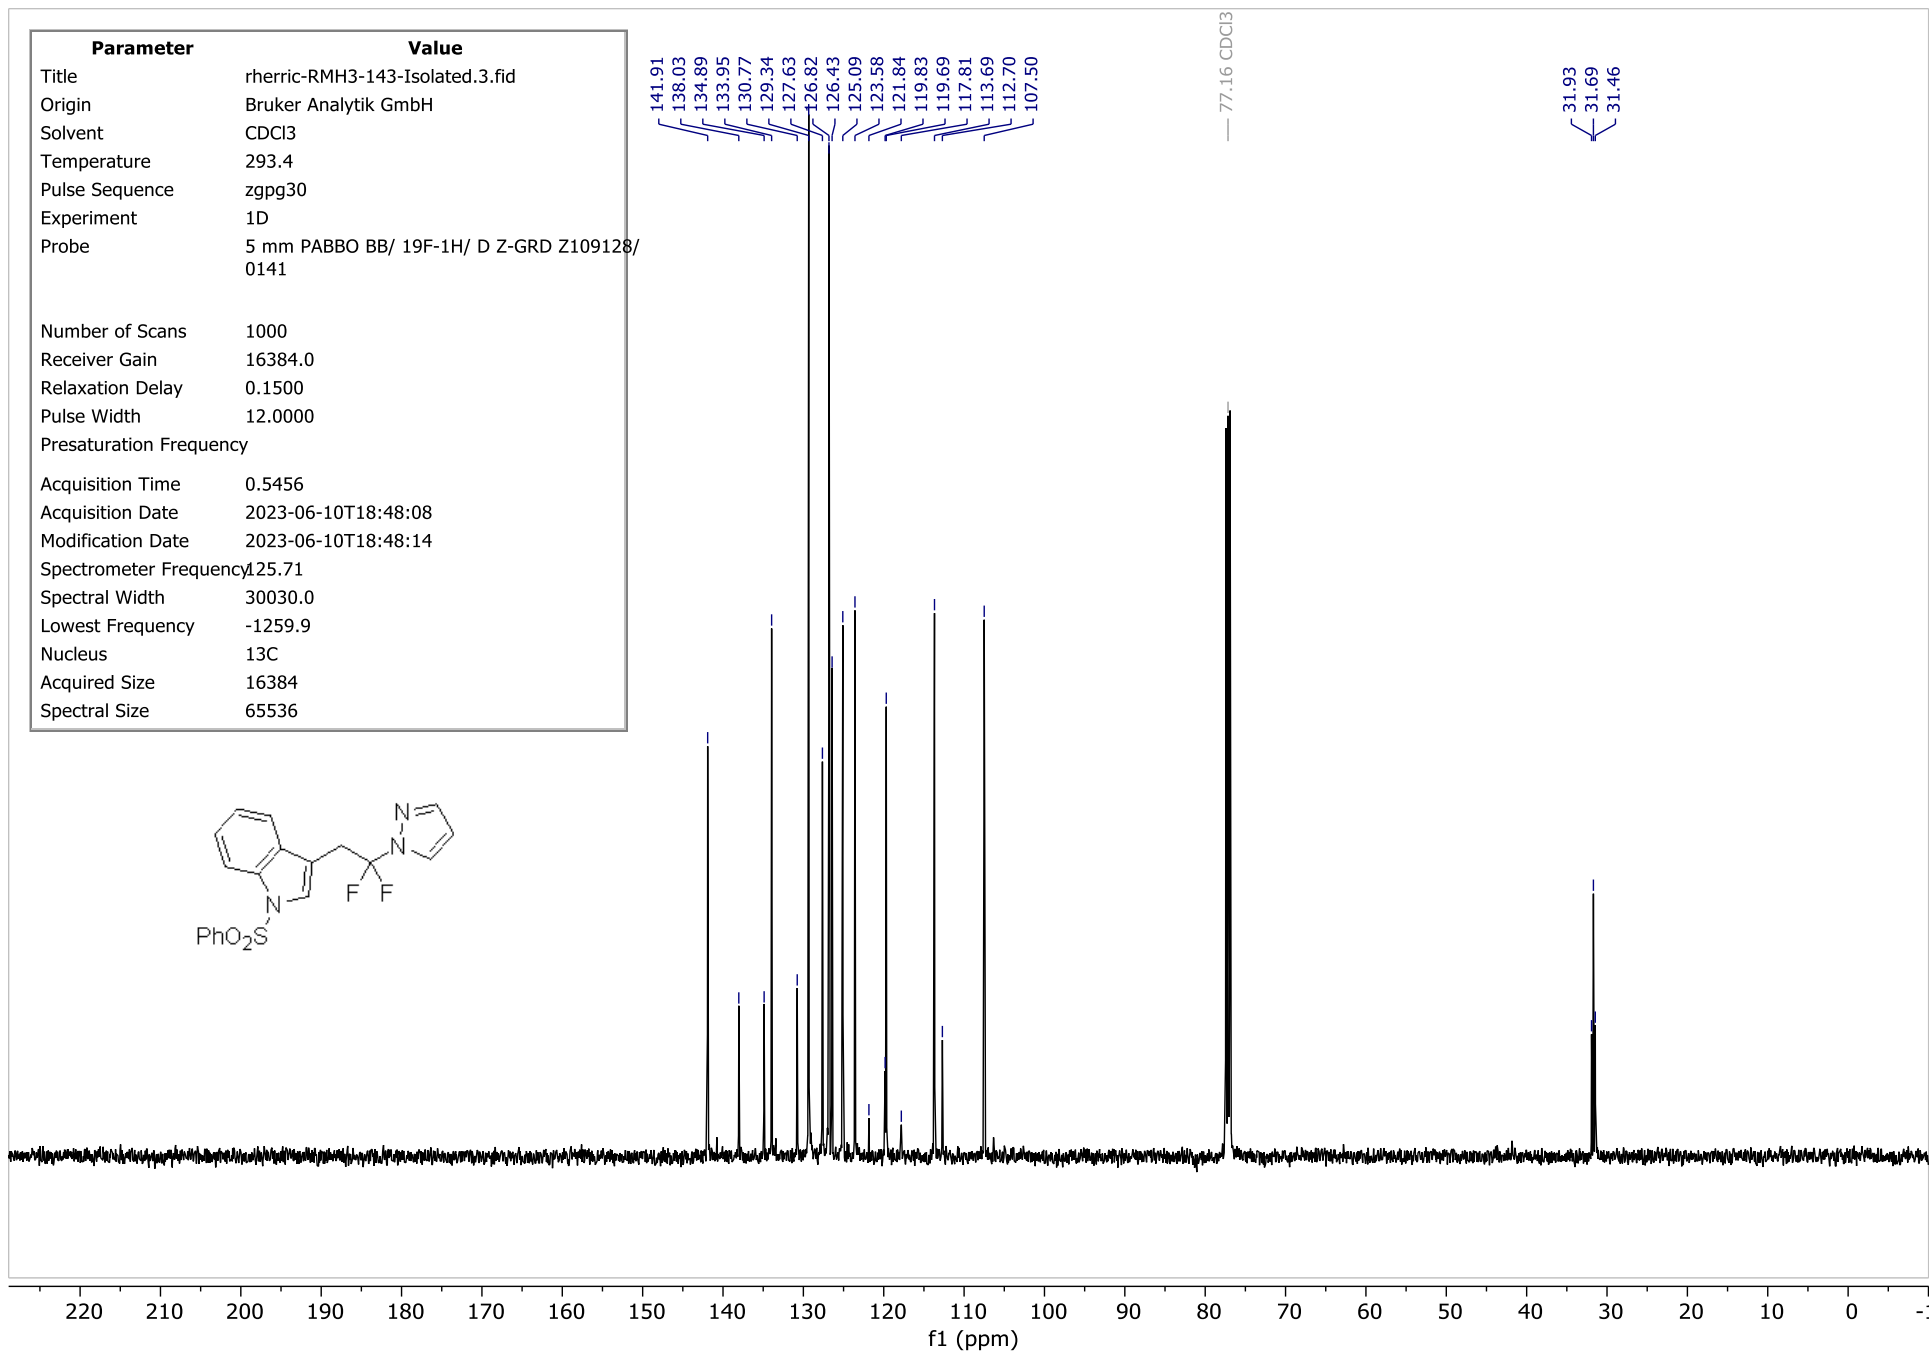

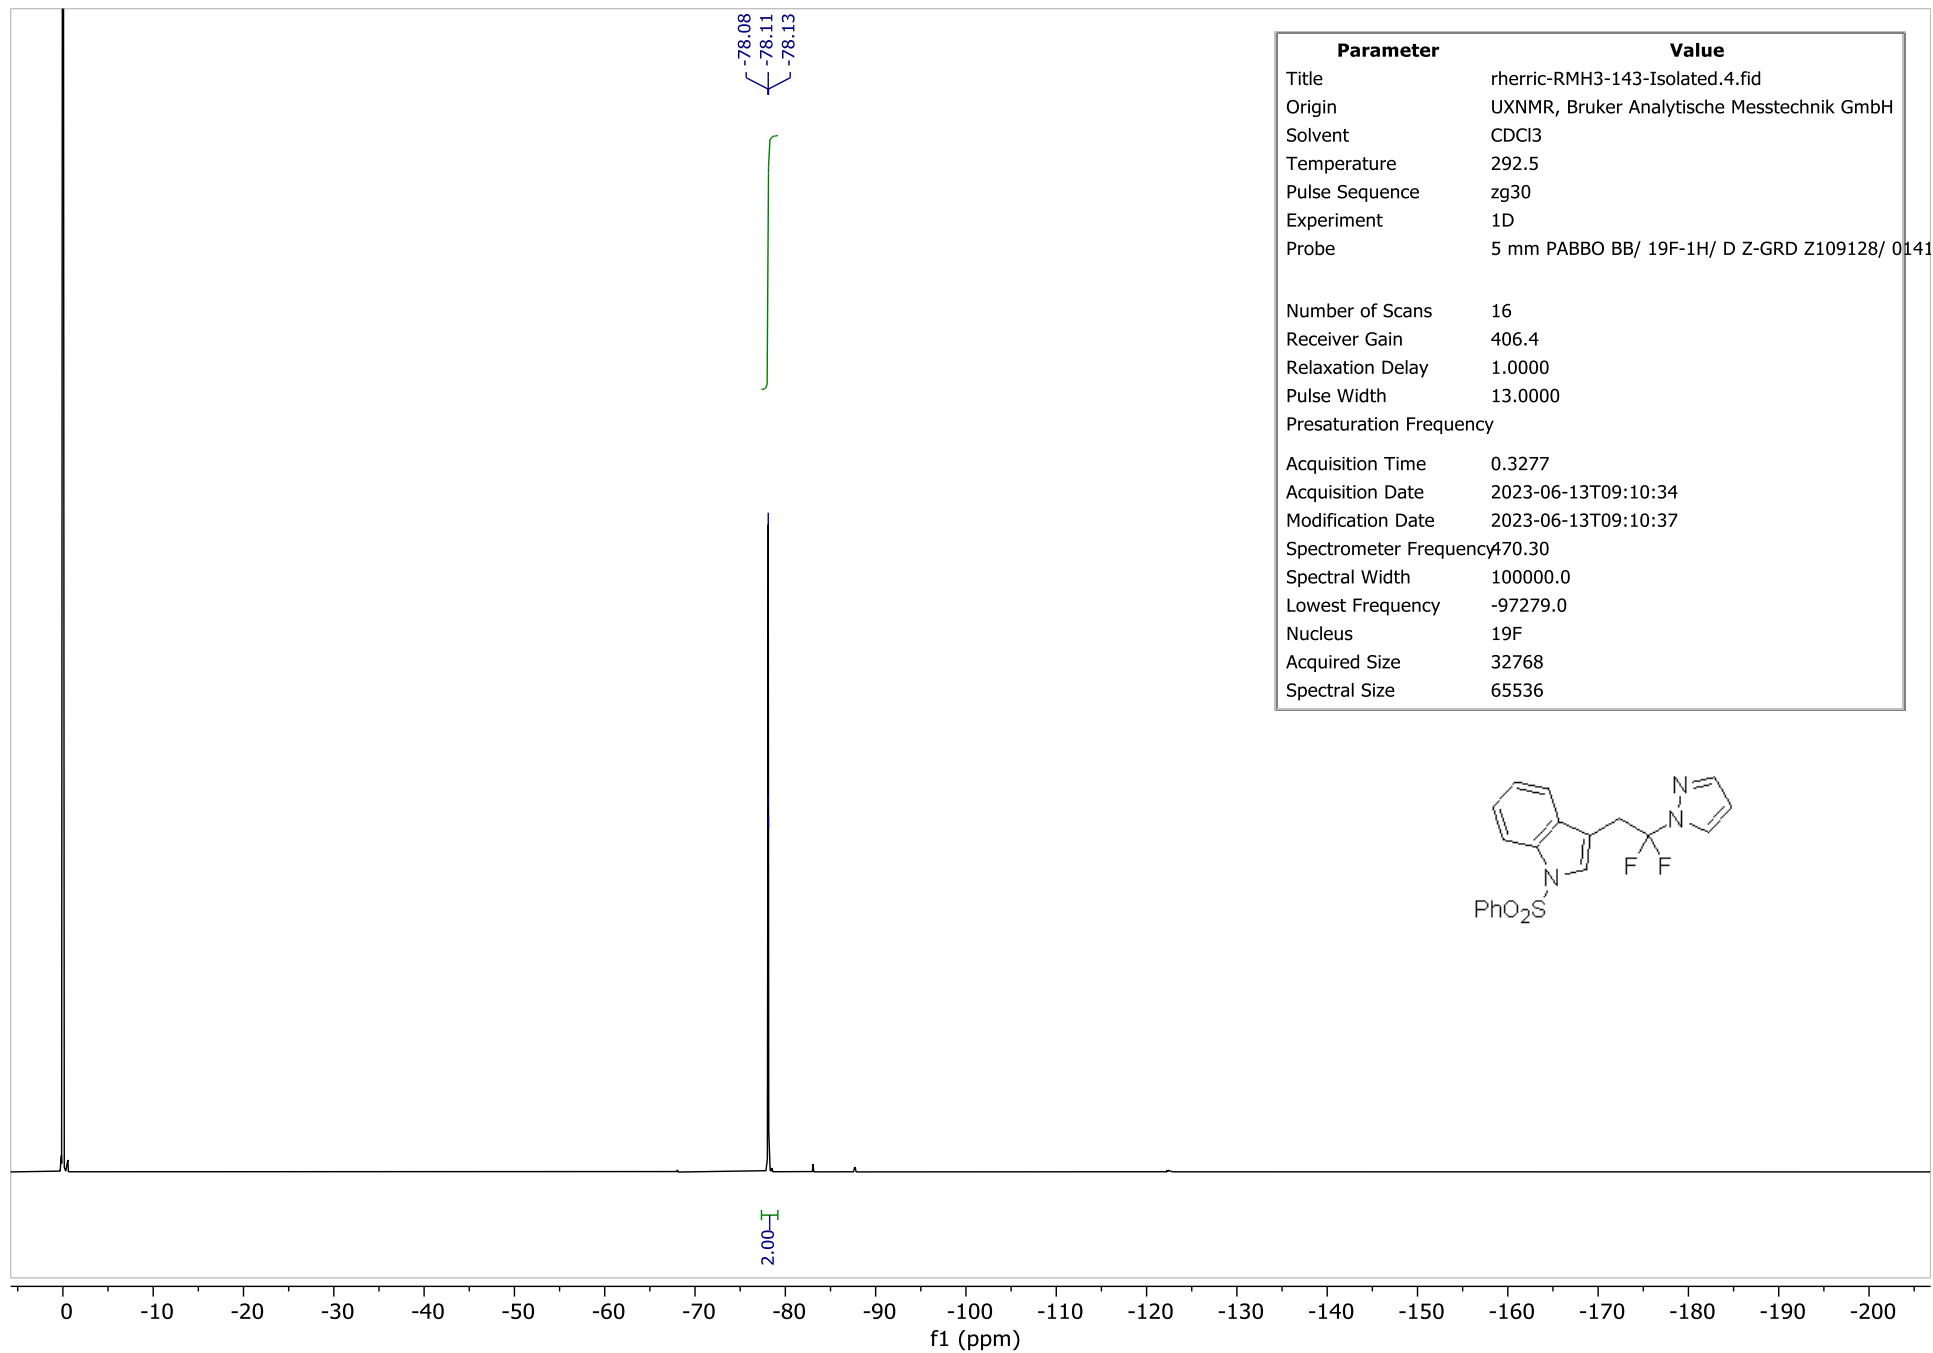

| Parameter               | Value                                        |
|-------------------------|----------------------------------------------|
| Title                   | rherric-RMH3-143-Isolated.4.fid              |
| Origin                  | UXNMR, Bruker Analytische Messtechnik GmbH   |
| Solvent                 | CDCl3                                        |
| Temperature             | 292.5                                        |
| Pulse Sequence          | zg30                                         |
| Experiment              | 1D                                           |
| Probe                   | 5 mm PABBO BB/ 19F-1H/ D Z-GRD Z109128/ 0141 |
| Number of Scans         | 16                                           |
| Receiver Gain           | 406.4                                        |
| Relaxation Delay        | 1.0000                                       |
| Pulse Width             | 13.0000                                      |
| Presaturation Frequency |                                              |
| Acquisition Time        | 0.3277                                       |
| Acquisition Date        | 2023-06-13T09:10:34                          |
| Modification Date       | 2023-06-13T09:10:37                          |
| Spectrometer Frequency  | 470.30                                       |
| Spectral Width          | 100000.0                                     |
| Lowest Frequency        | -97279.0                                     |
| Nucleus                 | 19F                                          |
| Acquired Size           | 32768                                        |
| Spectral Size           | 65536                                        |

NMR spectra for 1-(1,1-difluoro-2-(1-tosyl-1*H*-pyrrol-2-yl)ethyl)-1*H*-pyrazole (**11f**)

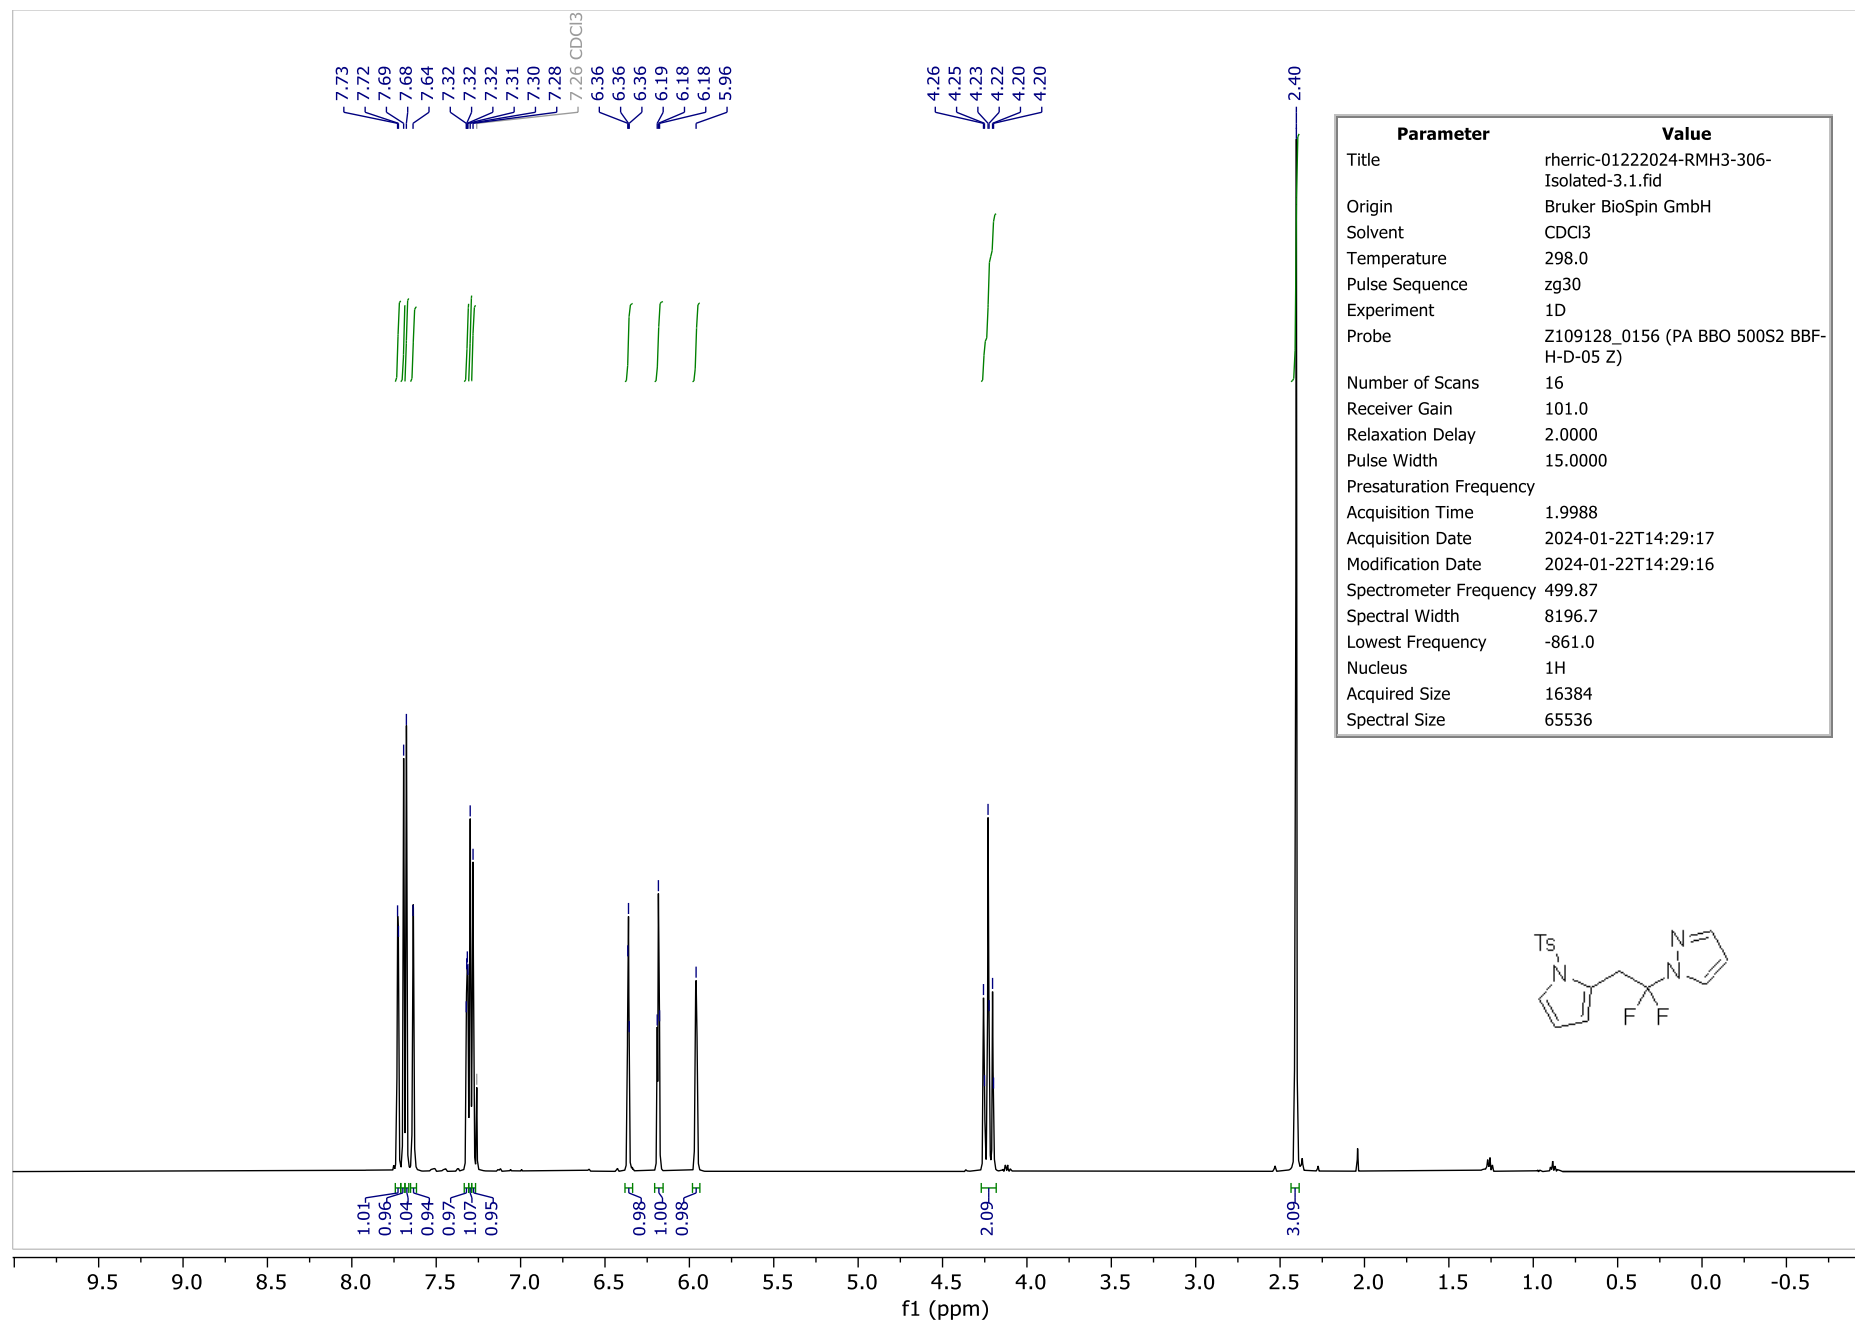

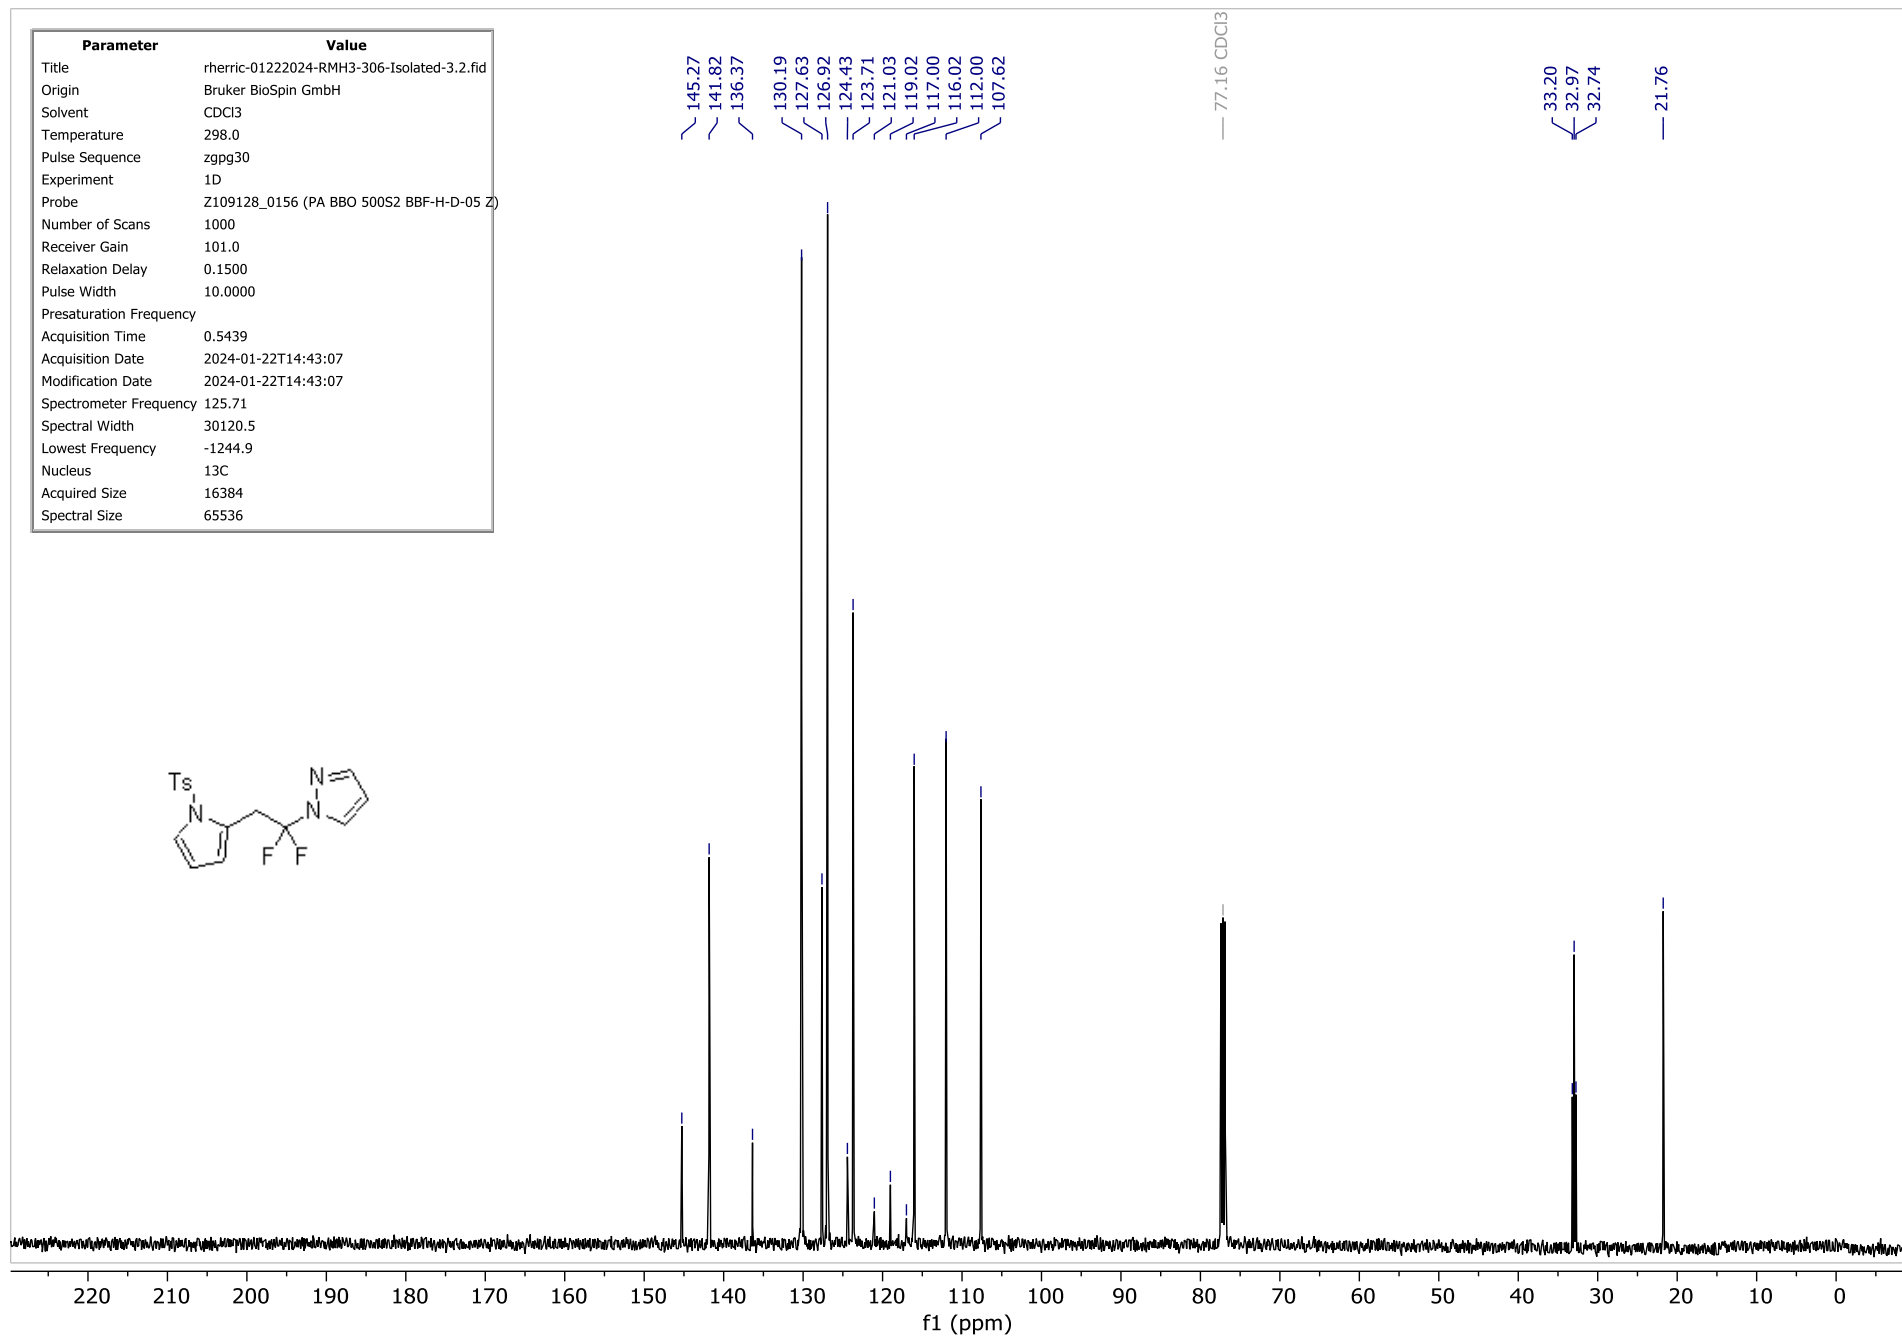



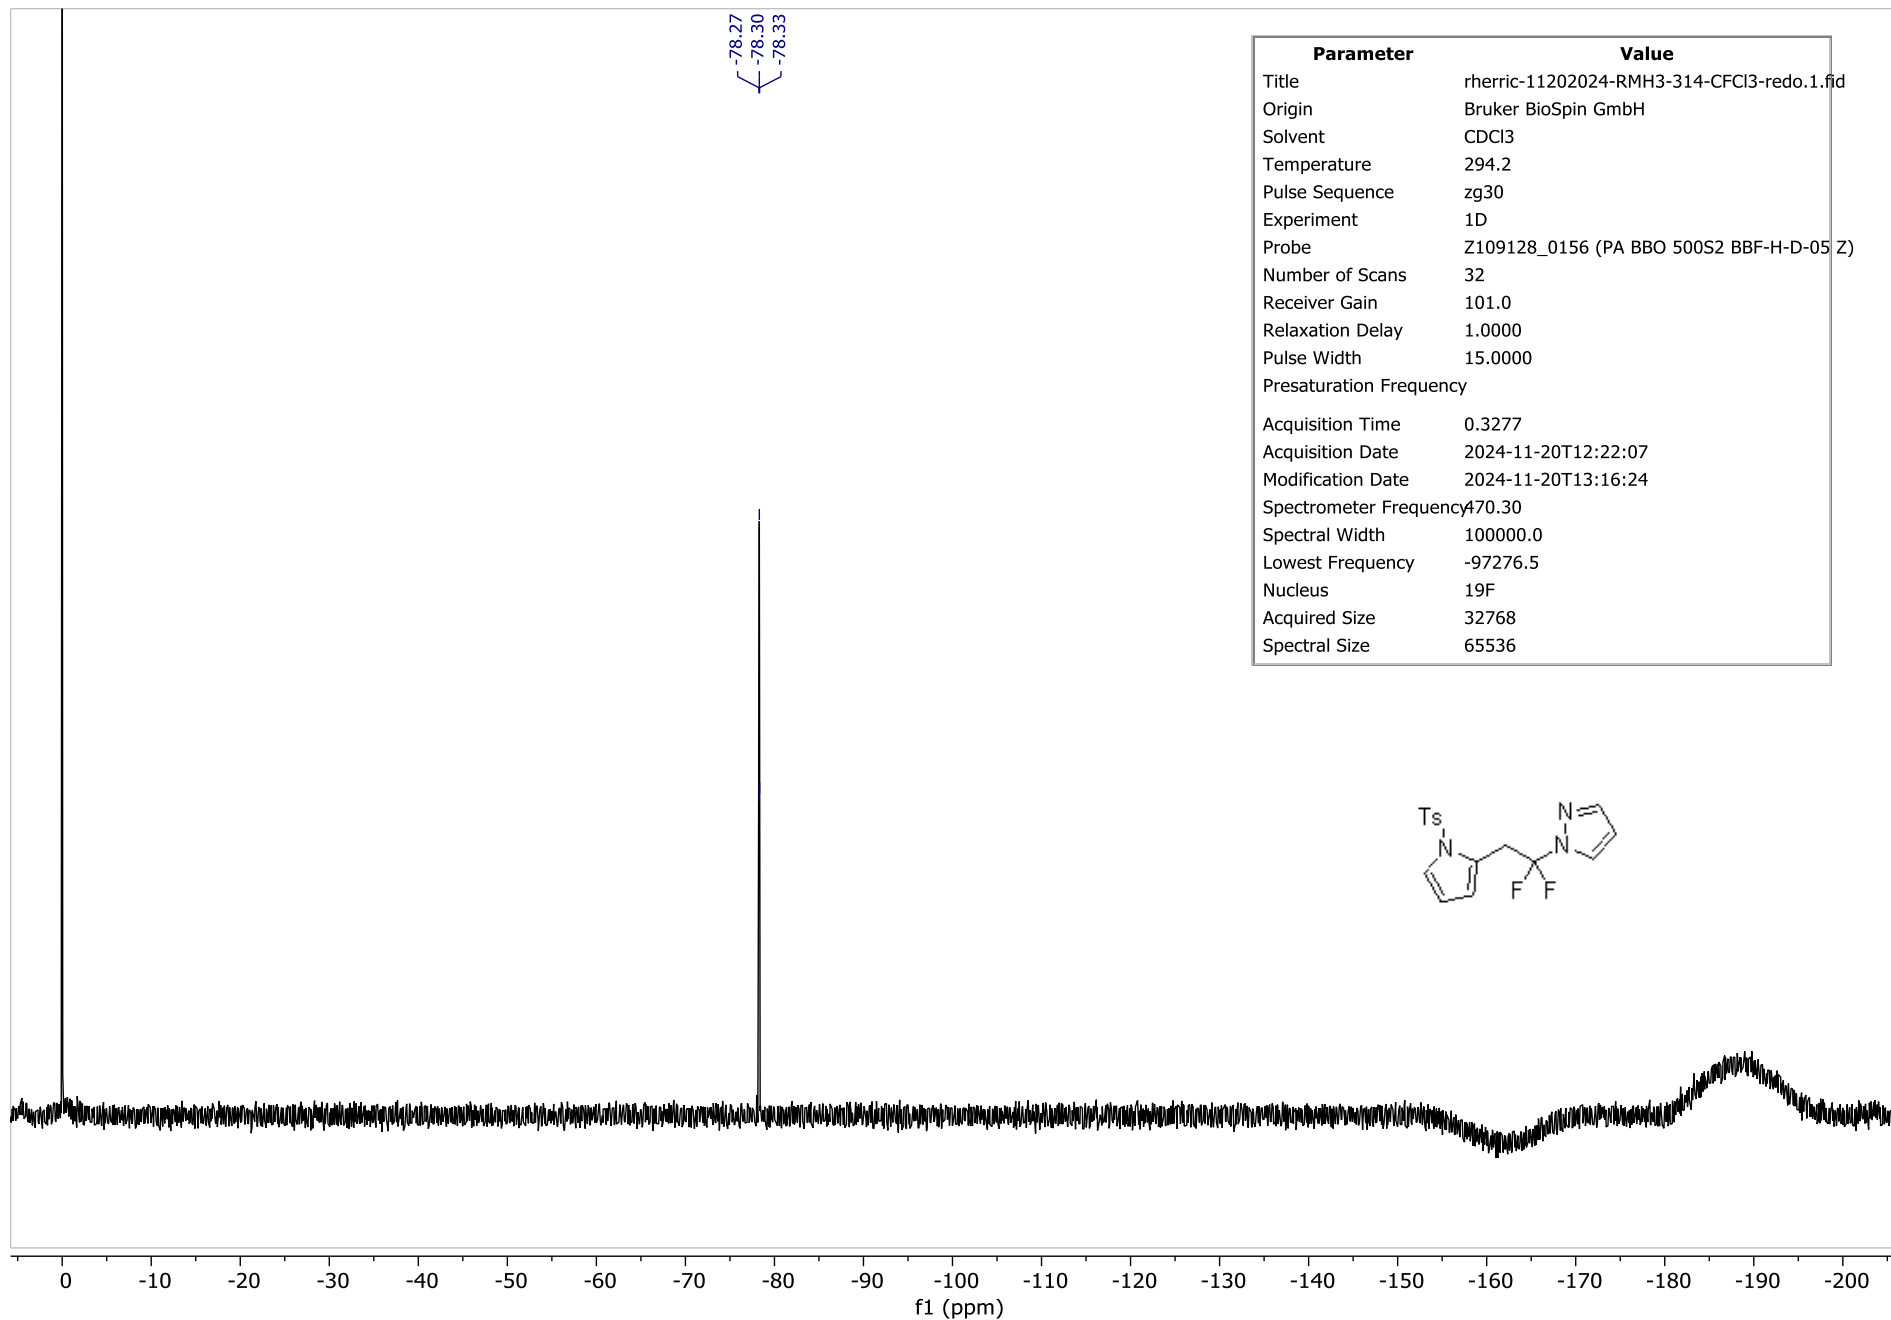

NMR spectra for 1-(difluoro((2R,3R,4S,5R,6R)-3,4,5-tris(benzyloxy)-6-((benzyloxy)methyl)tetrahydro-2H-pyran-2-yl)methyl)-1H-indazole (**11g**)

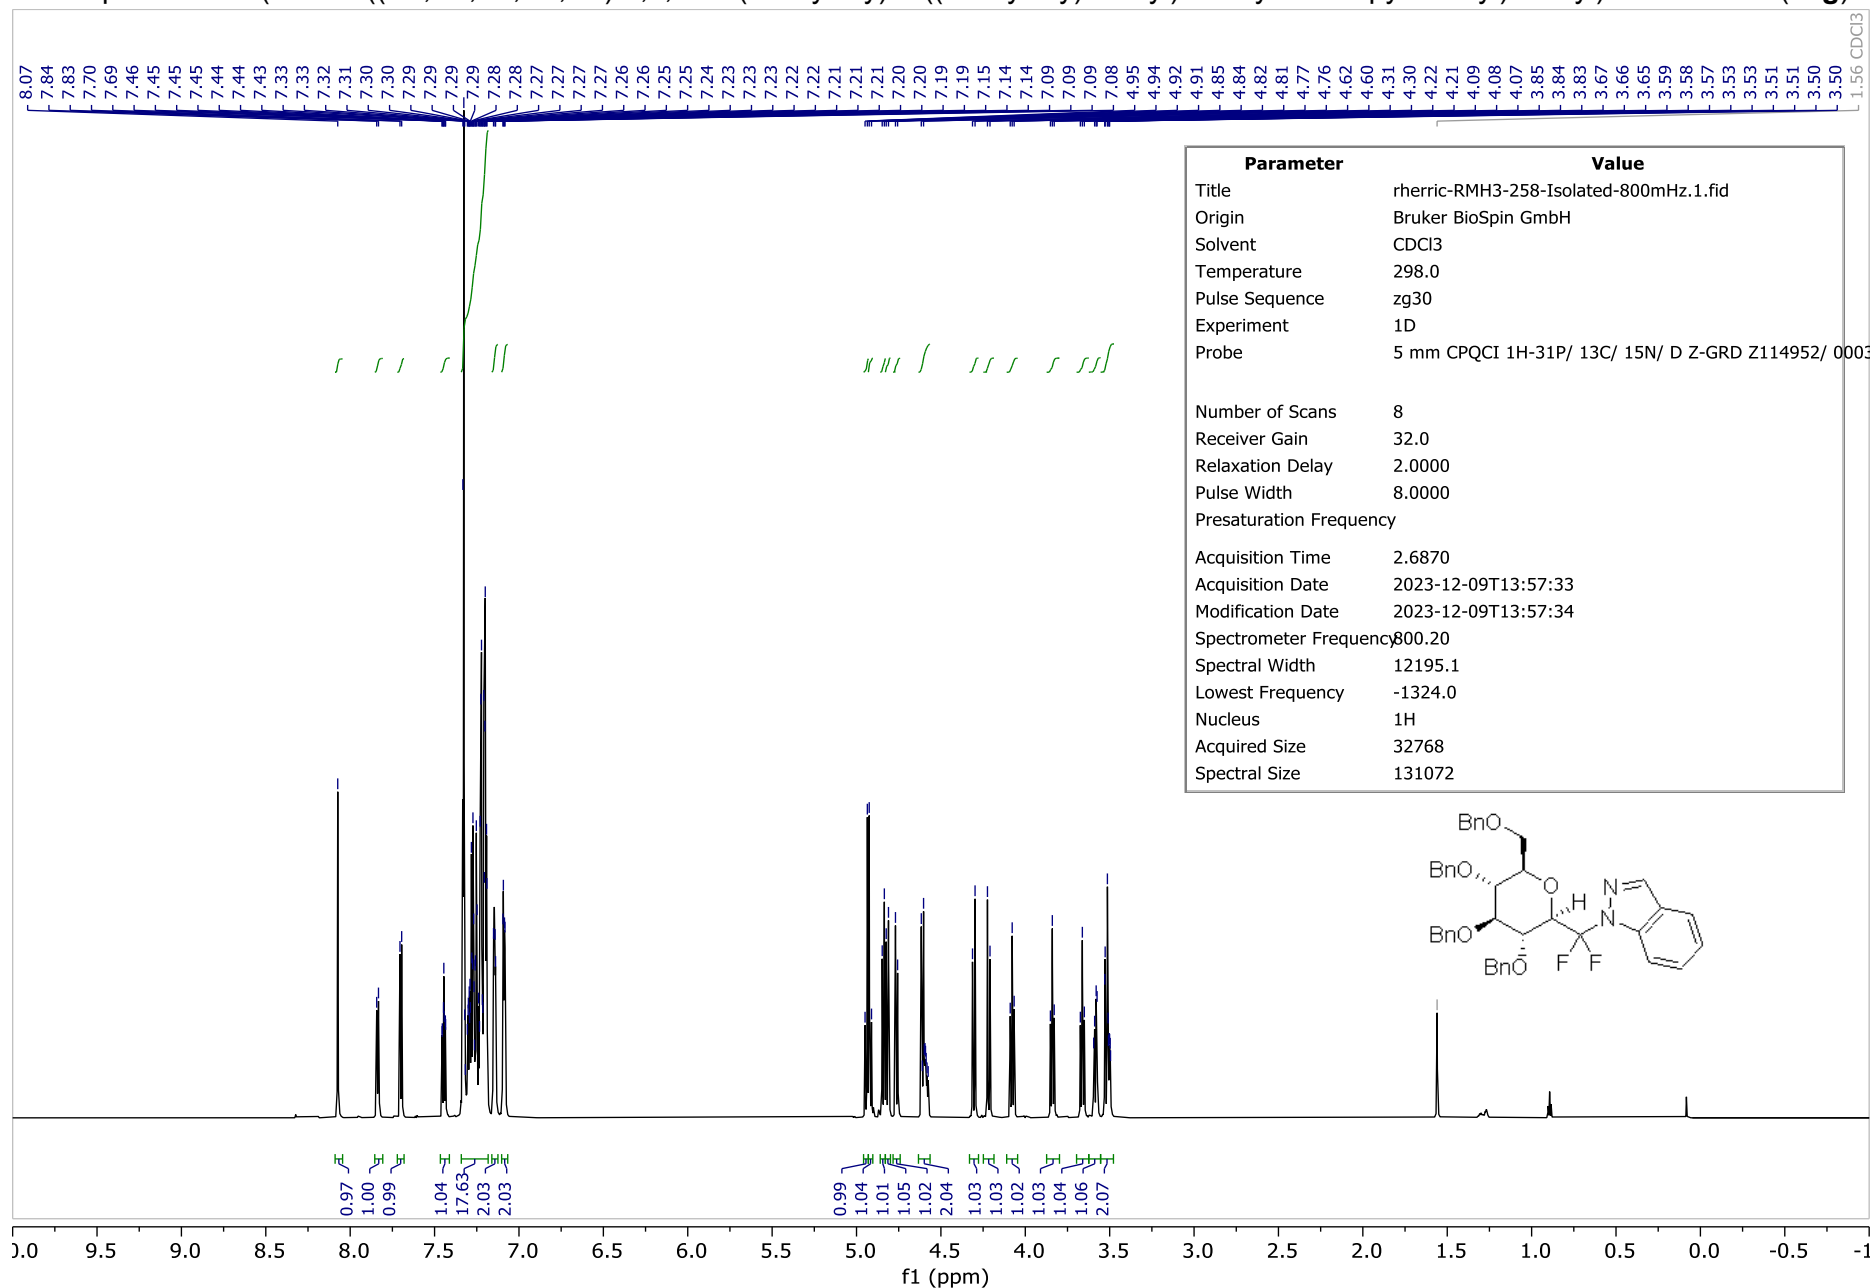

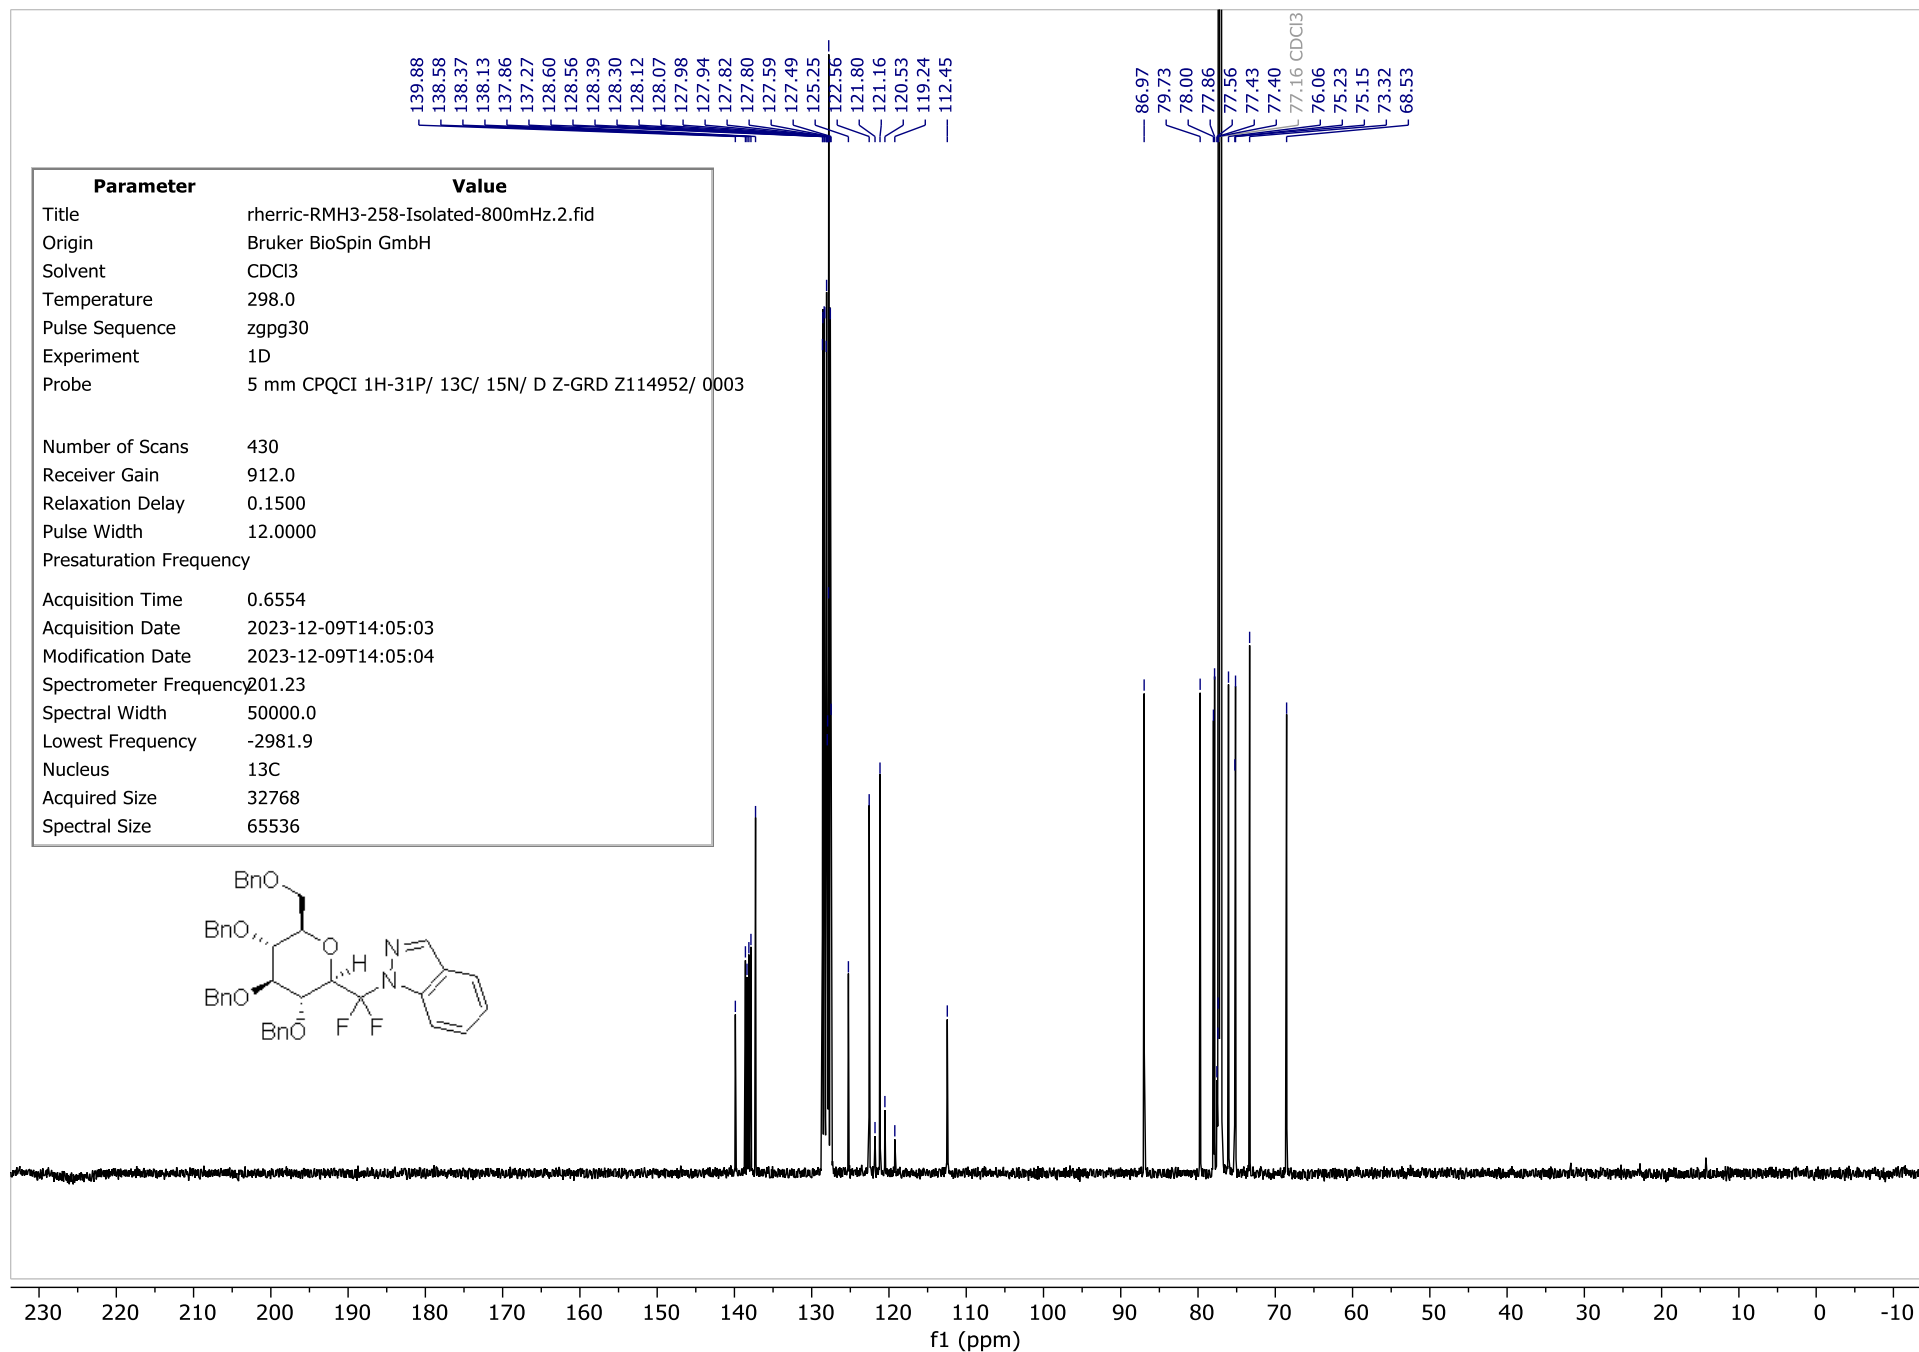

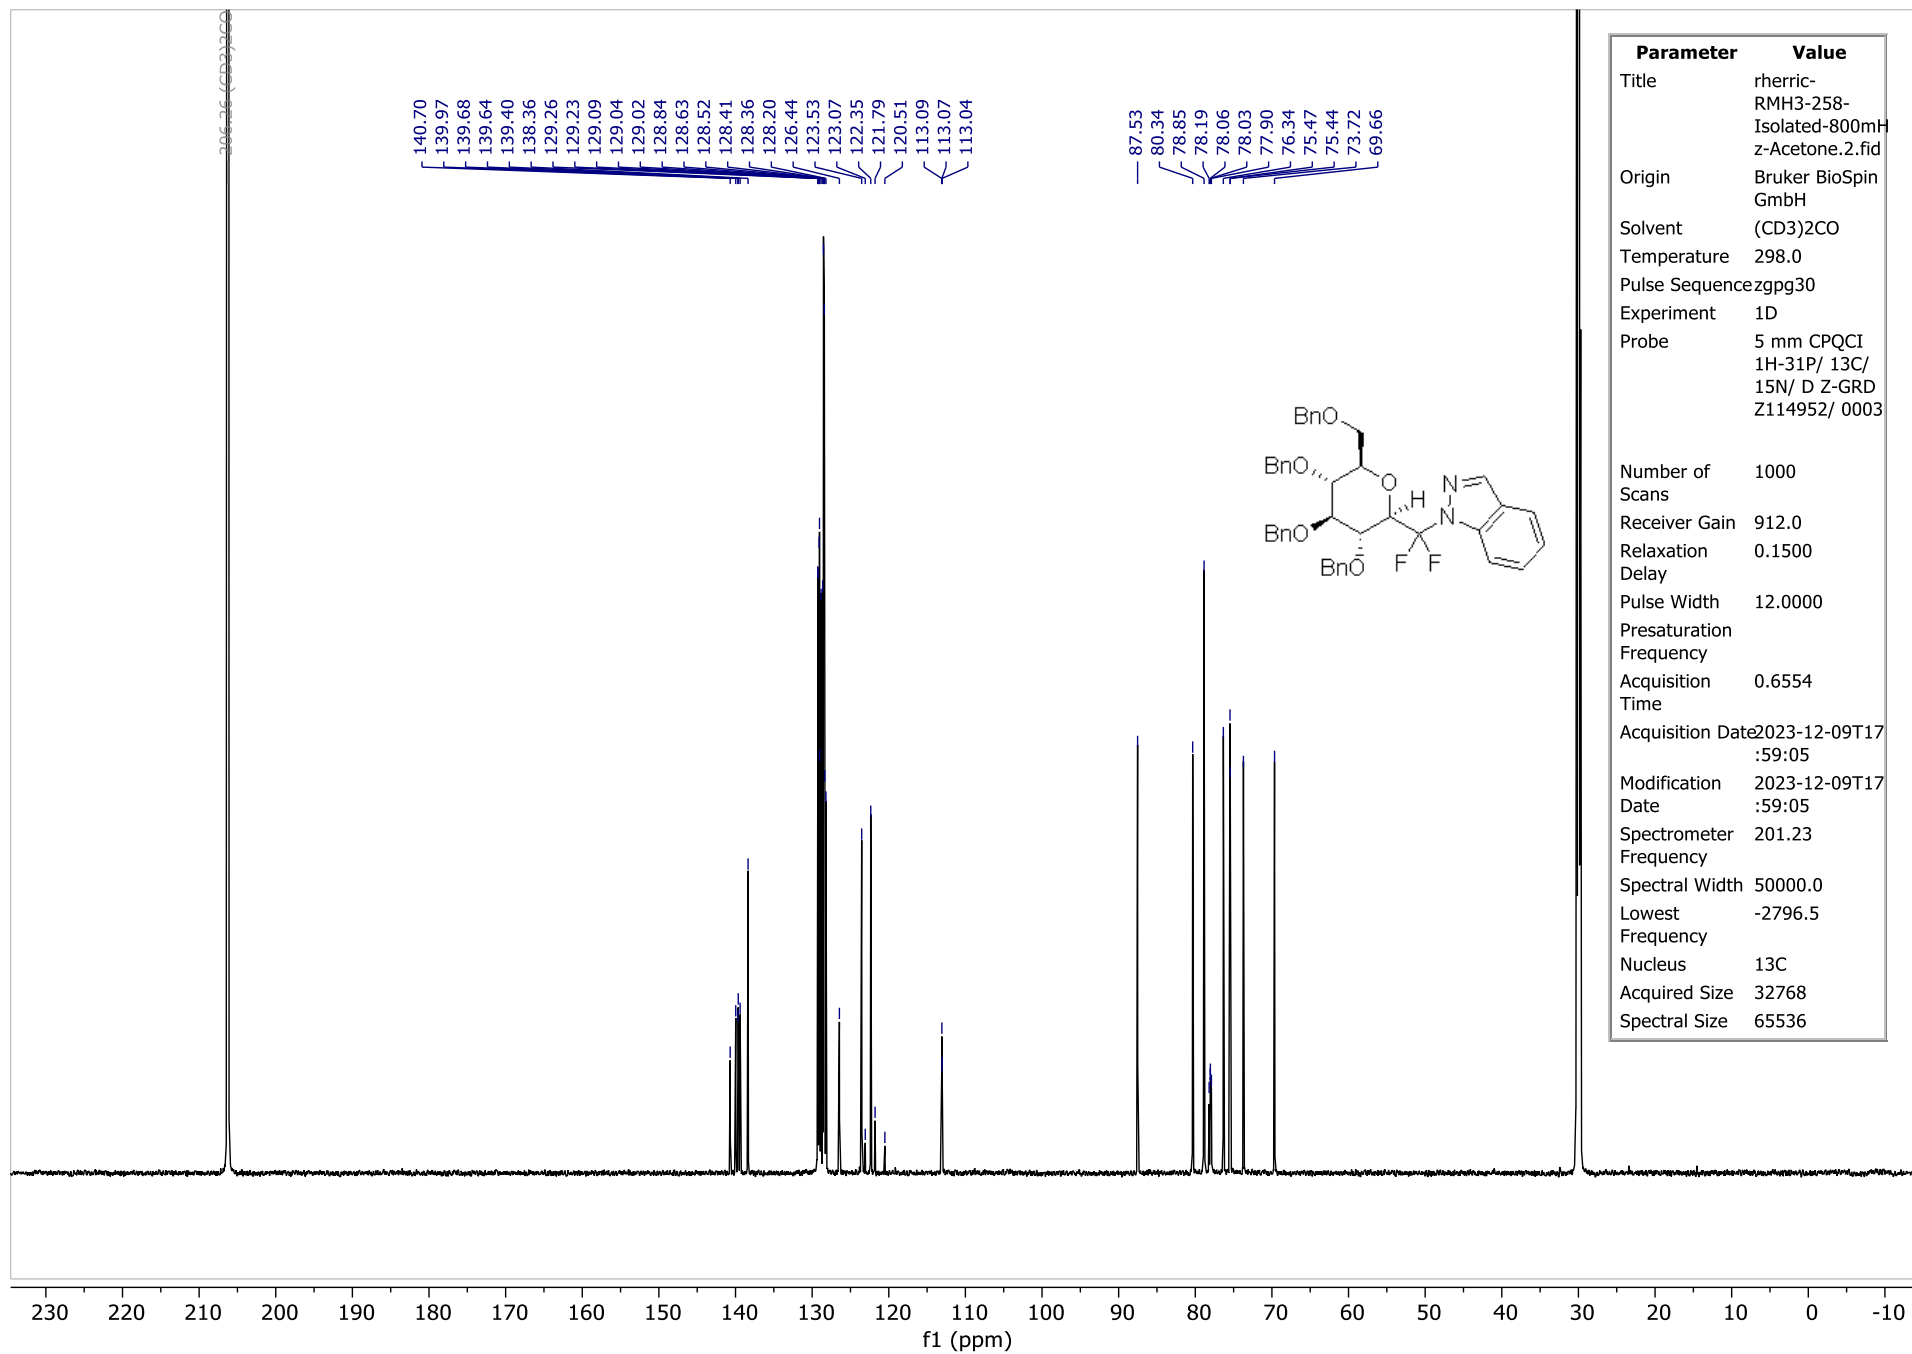

| Parameter               | Value                                              |
|-------------------------|----------------------------------------------------|
| Title                   | rherric-RMH3-258-Isolated-800mH-z-Acetone.2.fid    |
| Origin                  | Bruker BioSpin GmbH                                |
| Solvent                 | (CD3)2CO                                           |
| Temperature             | 298.0                                              |
| Pulse Sequence          | zgpg30                                             |
| Experiment              | 1D                                                 |
| Probe                   | 5 mm CPQCI 1H-31P/ 13C/ 15N/ D Z-GRD Z114952/ 0003 |
| Number of Scans         | 1000                                               |
| Receiver Gain           | 912.0                                              |
| Relaxation Delay        | 0.1500                                             |
| Pulse Width             | 12.0000                                            |
| Presaturation Frequency |                                                    |
| Acquisition Time        | 0.6554                                             |
| Acquisition Date        | 2023-12-09T17:59:05                                |
| Modification Date       | 2023-12-09T17:59:05                                |
| Spectrometer Frequency  | 201.23                                             |
| Spectral Width          | 50000.0                                            |
| Lowest Frequency        | -2796.5                                            |
| Nucleus                 | 13C                                                |
| Acquired Size           | 32768                                              |
| Spectral Size           | 65536                                              |

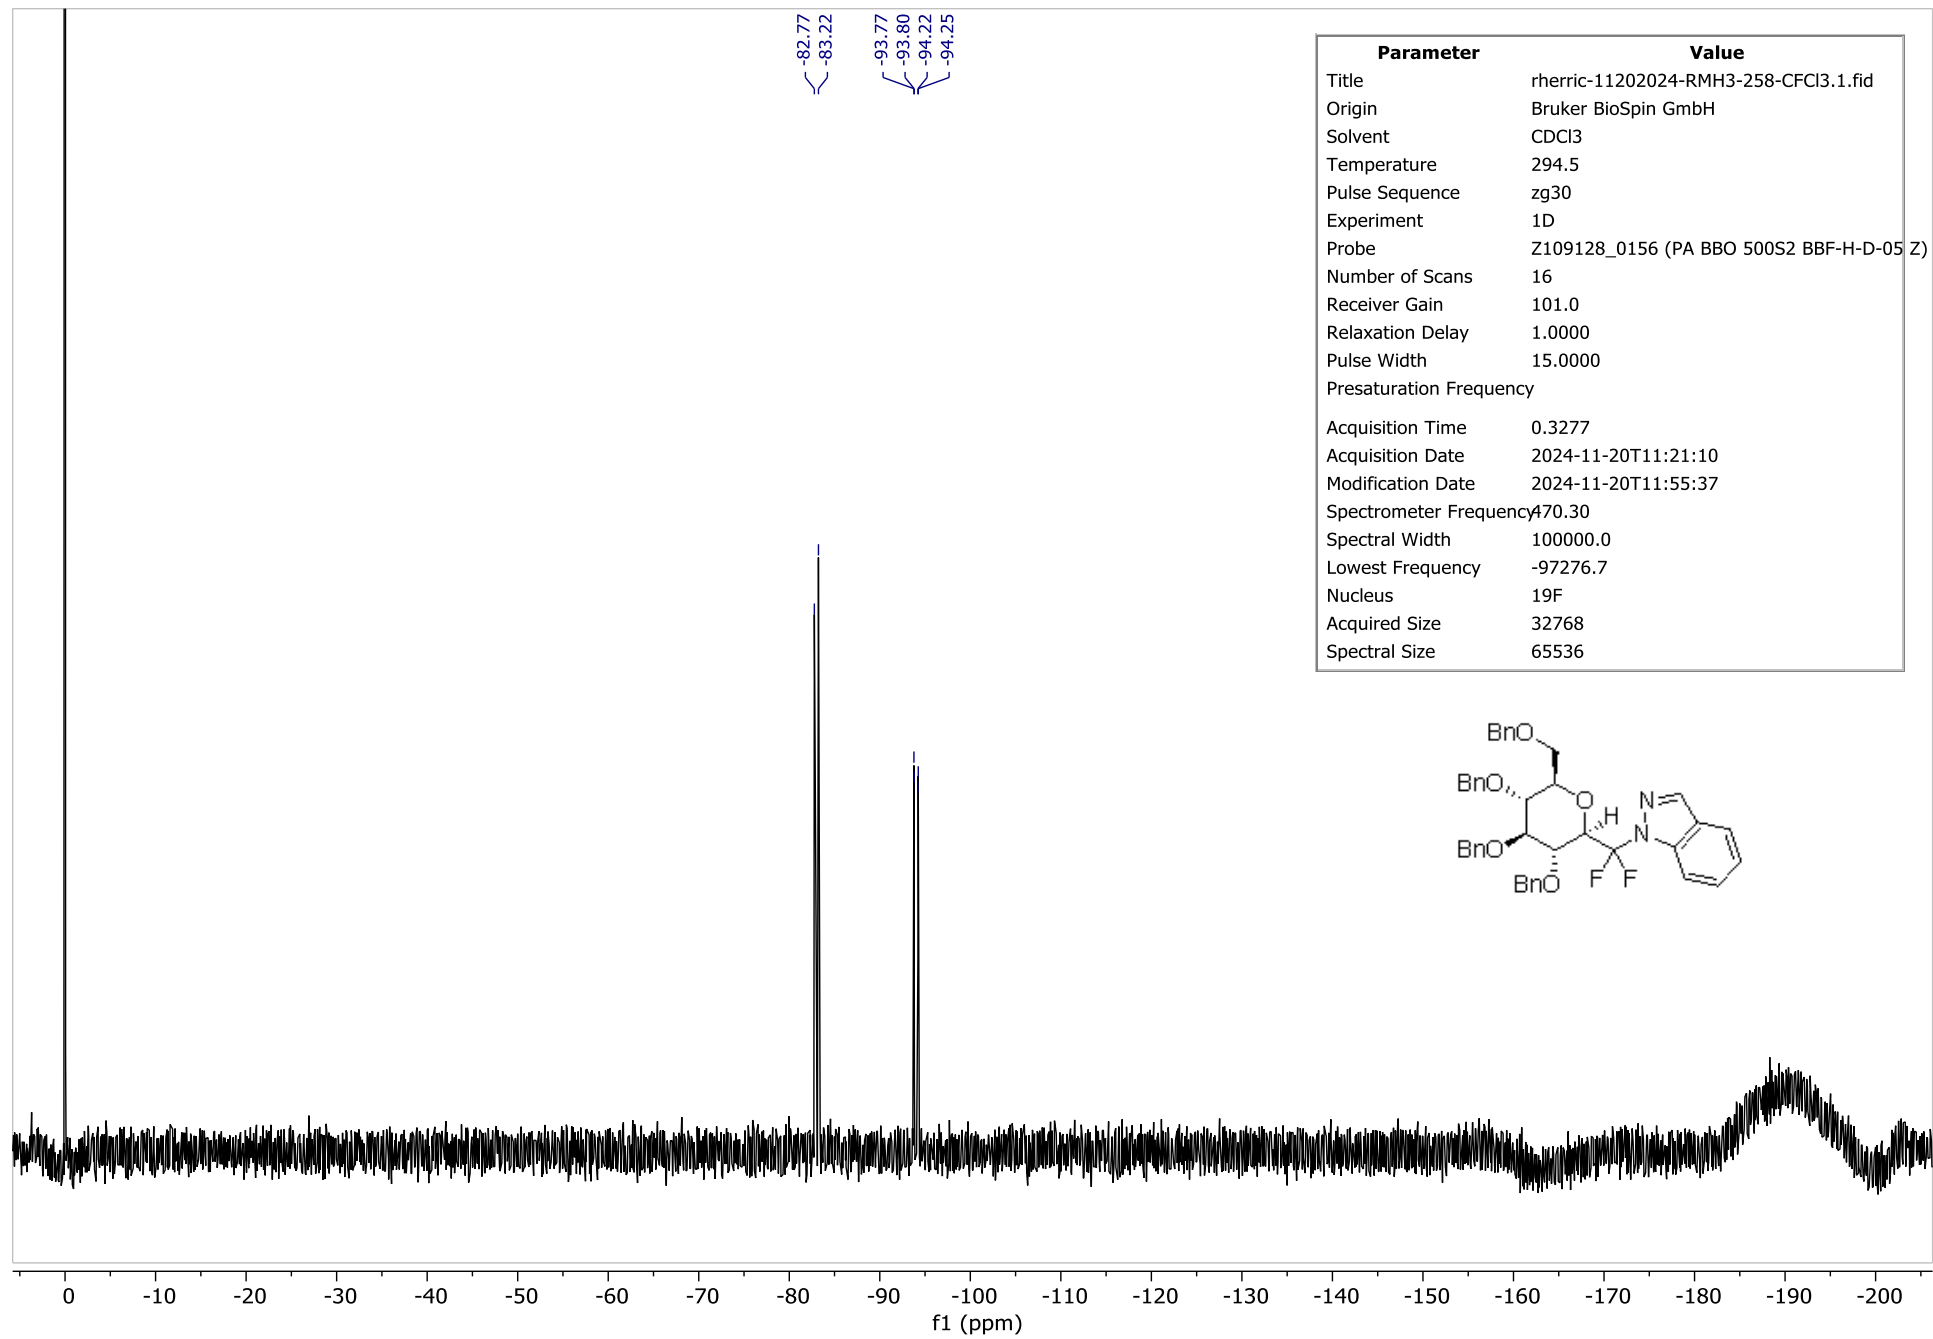

# NMR spectra for 1-(difluoro(1,2,3,4-tetrahydronaphthalen-1-yl)methyl)-1*H*-pyrazole (**11h**)

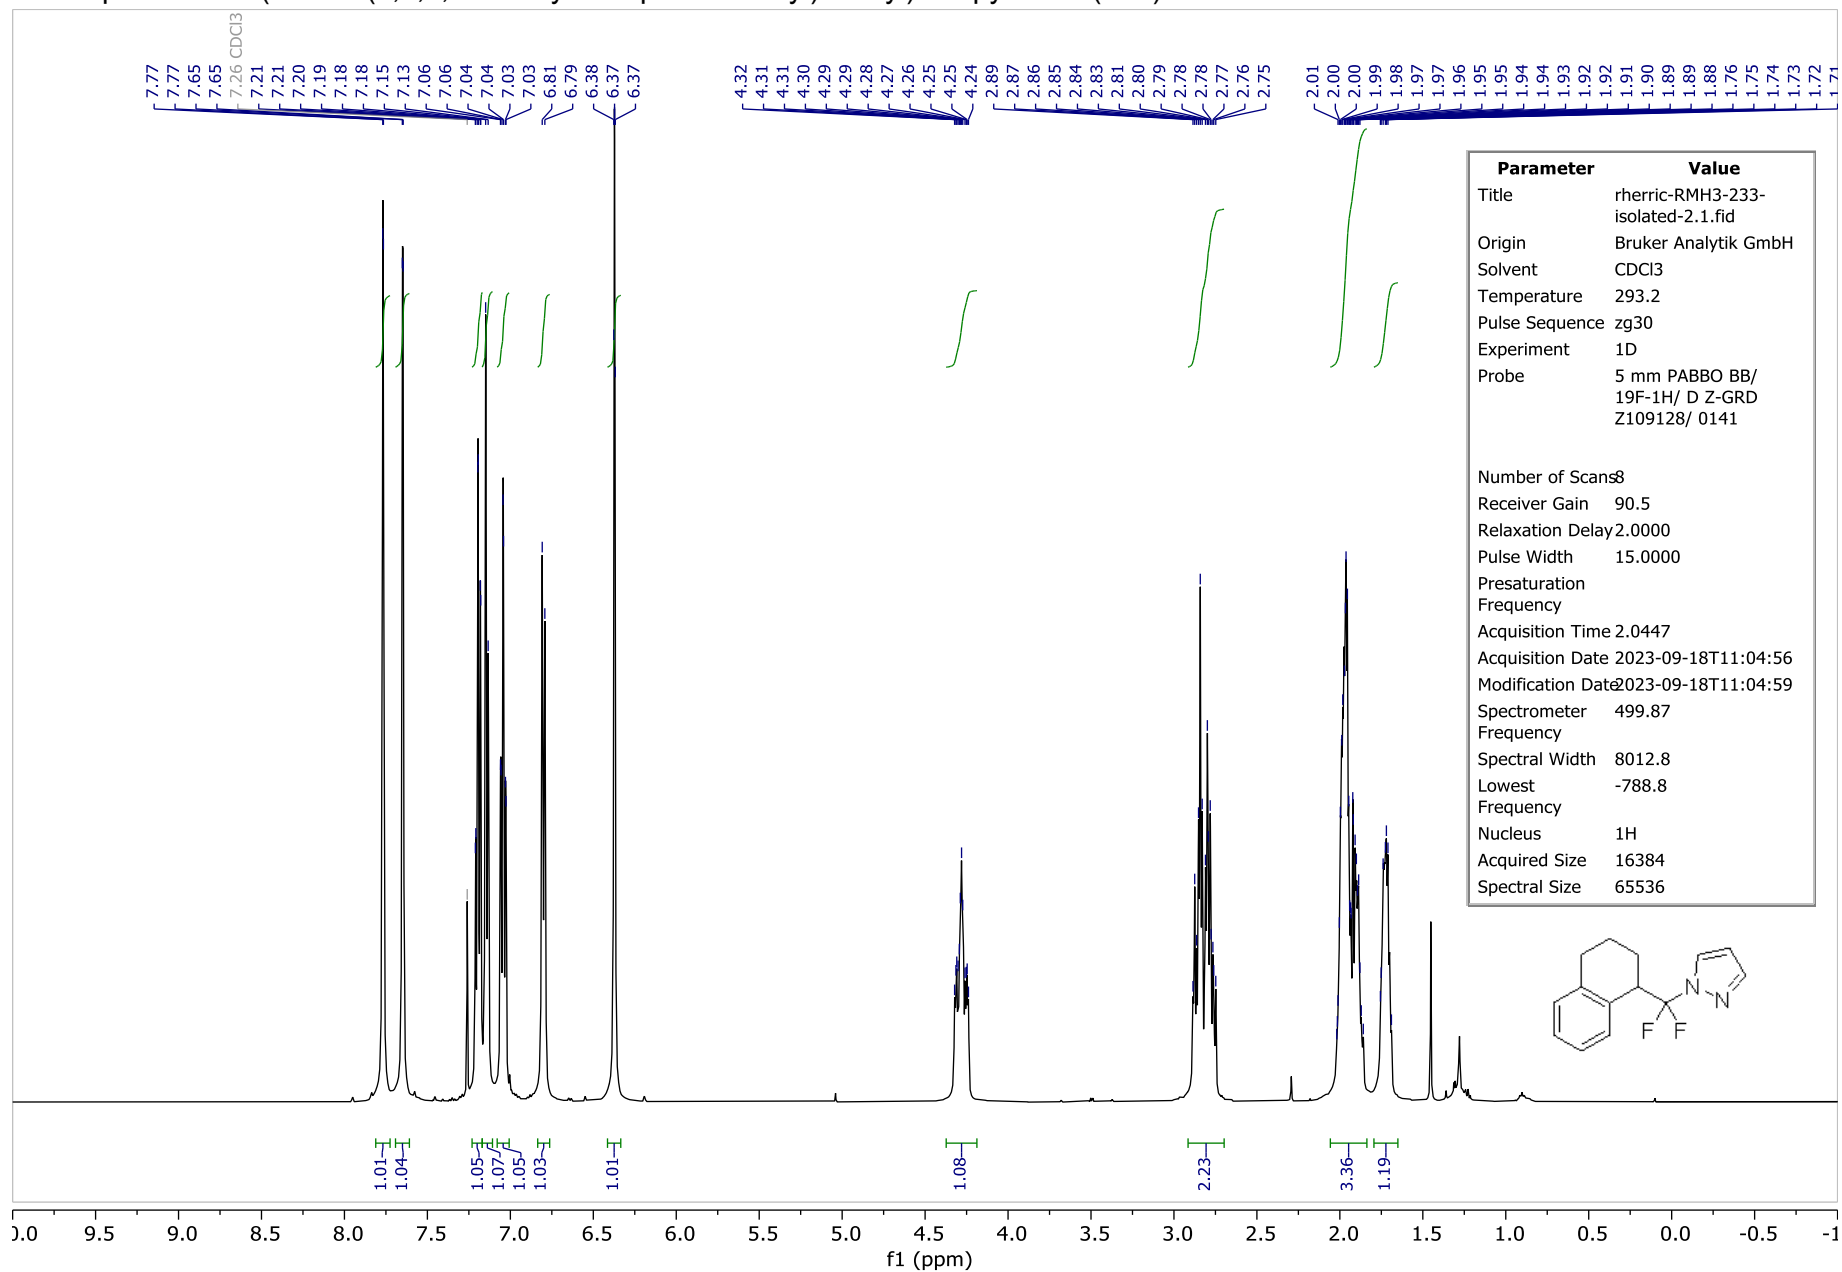

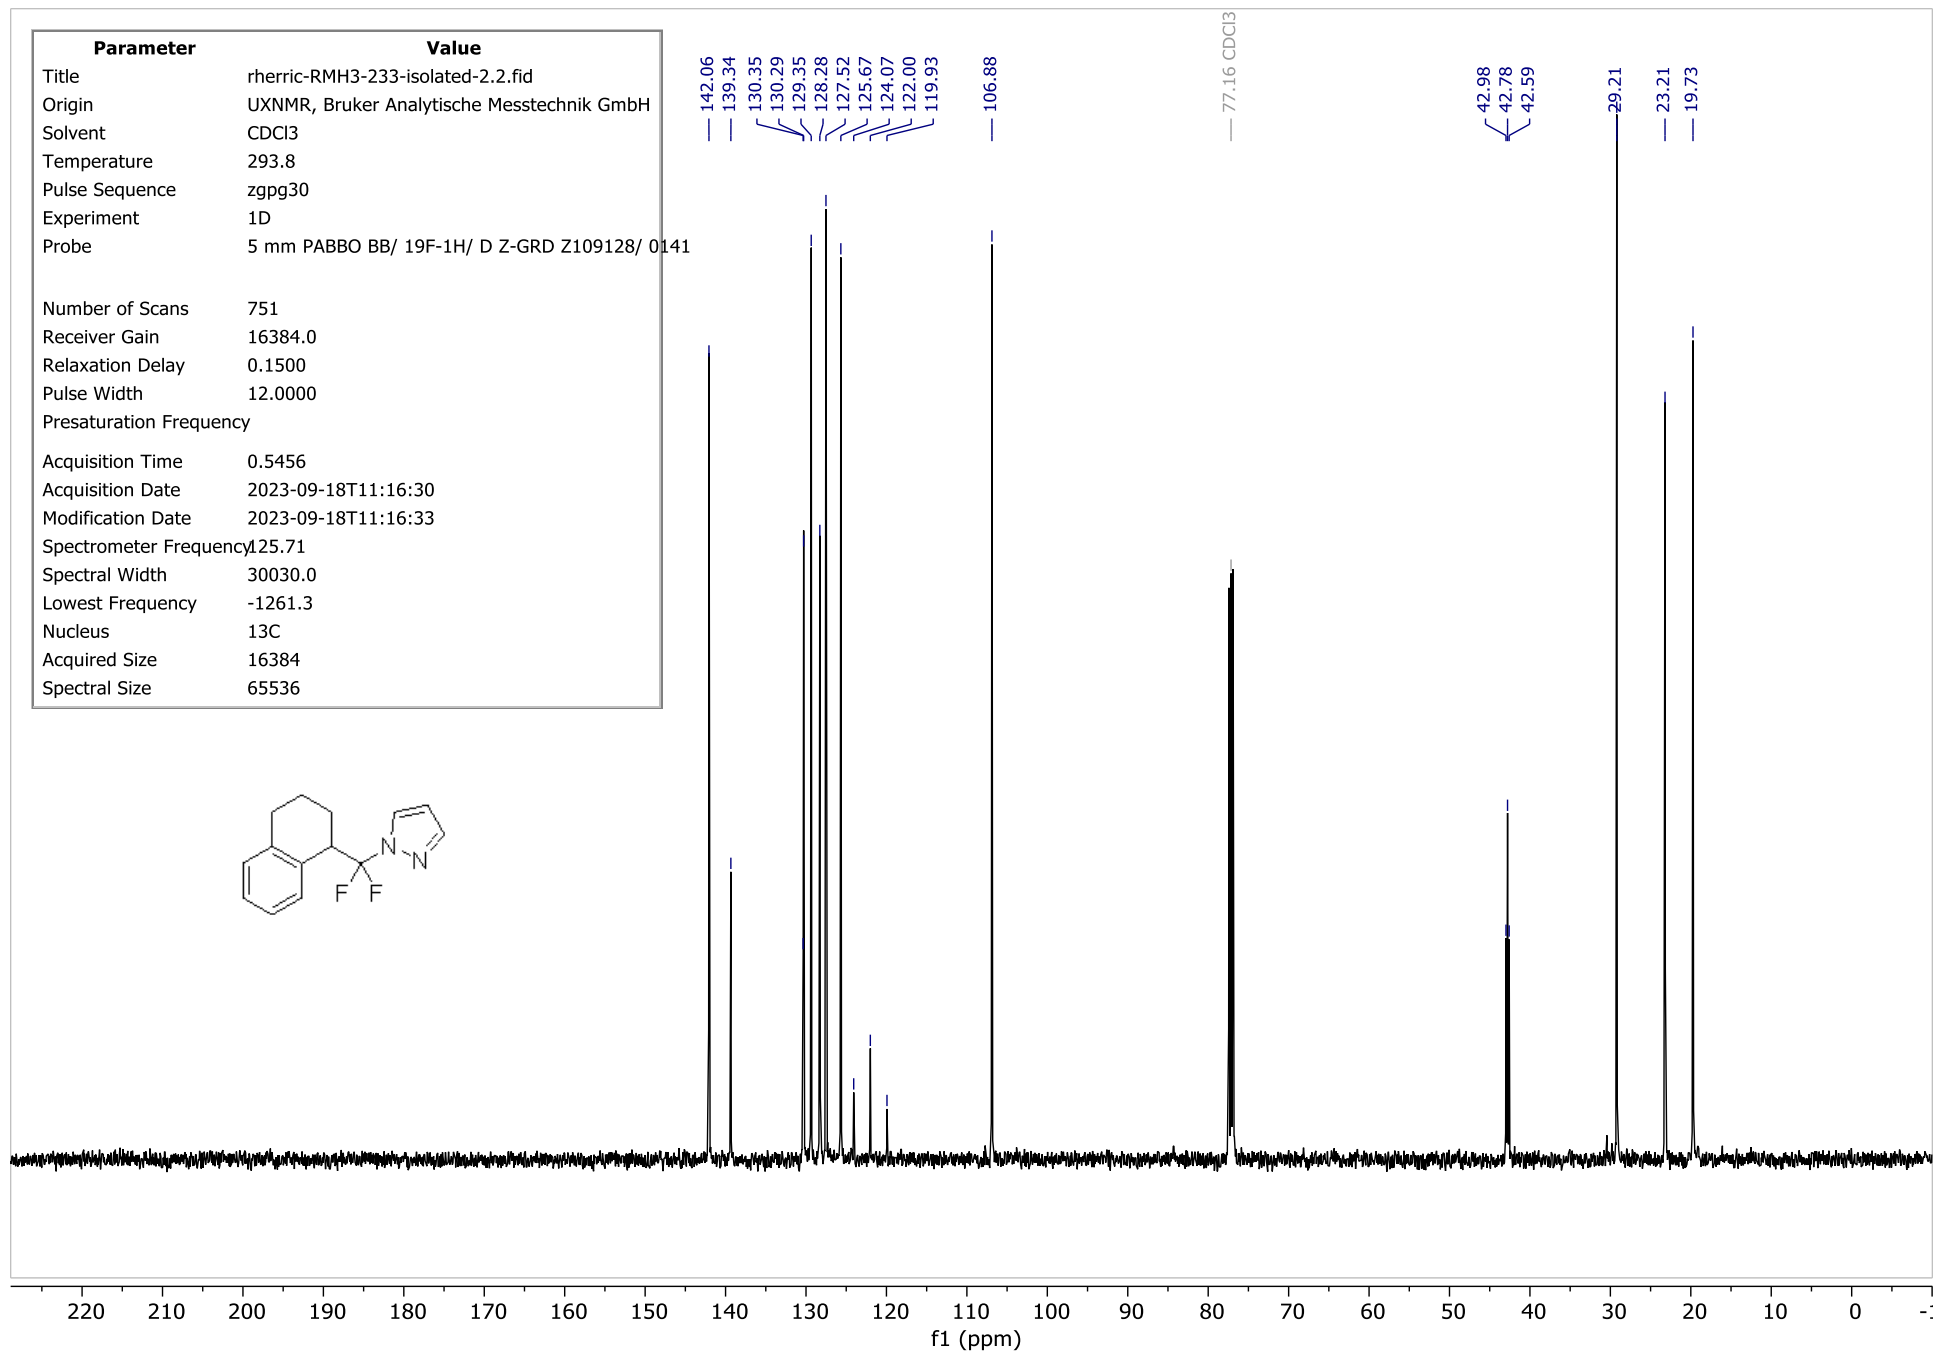

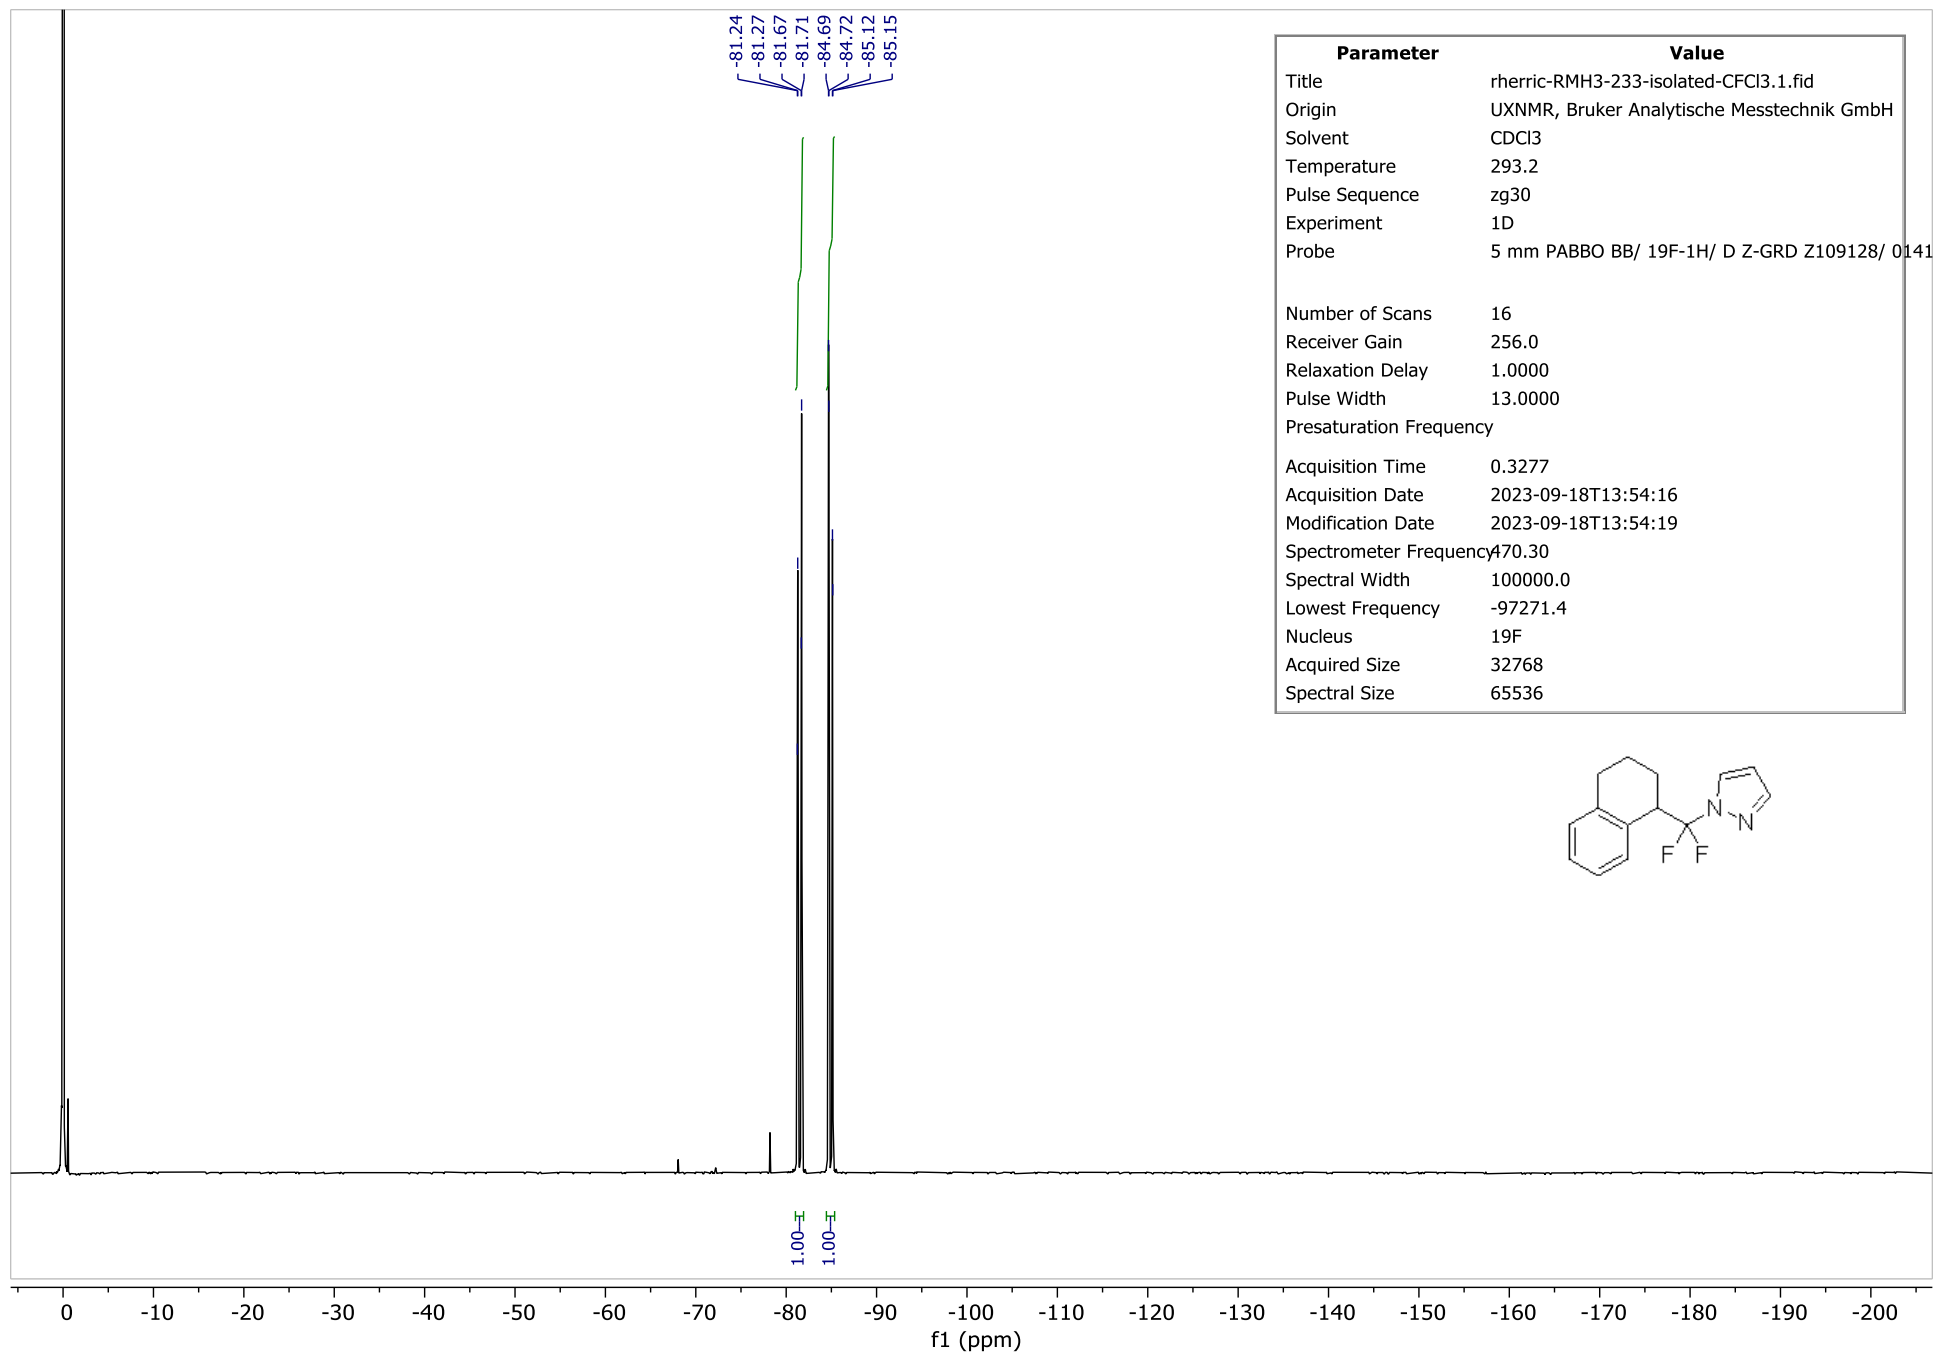

| Parameter               | Value                                        |
|-------------------------|----------------------------------------------|
| Title                   | rherric-RMH3-233-isolated-CFCI3.1.fid        |
| Origin                  | UXNMR, Bruker Analytische Messtechnik GmbH   |
| Solvent                 | CDCl3                                        |
| Temperature             | 293.2                                        |
| Pulse Sequence          | zg30                                         |
| Experiment              | 1D                                           |
| Probe                   | 5 mm PABBO BB/ 19F-1H/ D Z-GRD Z109128/ 0141 |
| Number of Scans         | 16                                           |
| Receiver Gain           | 256.0                                        |
| Relaxation Delay        | 1.0000                                       |
| Pulse Width             | 13.0000                                      |
| Presaturation Frequency |                                              |
| Acquisition Time        | 0.3277                                       |
| Acquisition Date        | 2023-09-18T13:54:16                          |
| Modification Date       | 2023-09-18T13:54:19                          |
| Spectrometer Frequency  | 470.30                                       |
| Spectral Width          | 100000.0                                     |
| Lowest Frequency        | -97271.4                                     |
| Nucleus                 | 19F                                          |
| Acquired Size           | 32768                                        |
| Spectral Size           | 65536                                        |



# NMR spectra for 1-(1,1-difluoro-2-(naphthalen-2-yl)ethyl)-1H-pyrazole (**11i**)

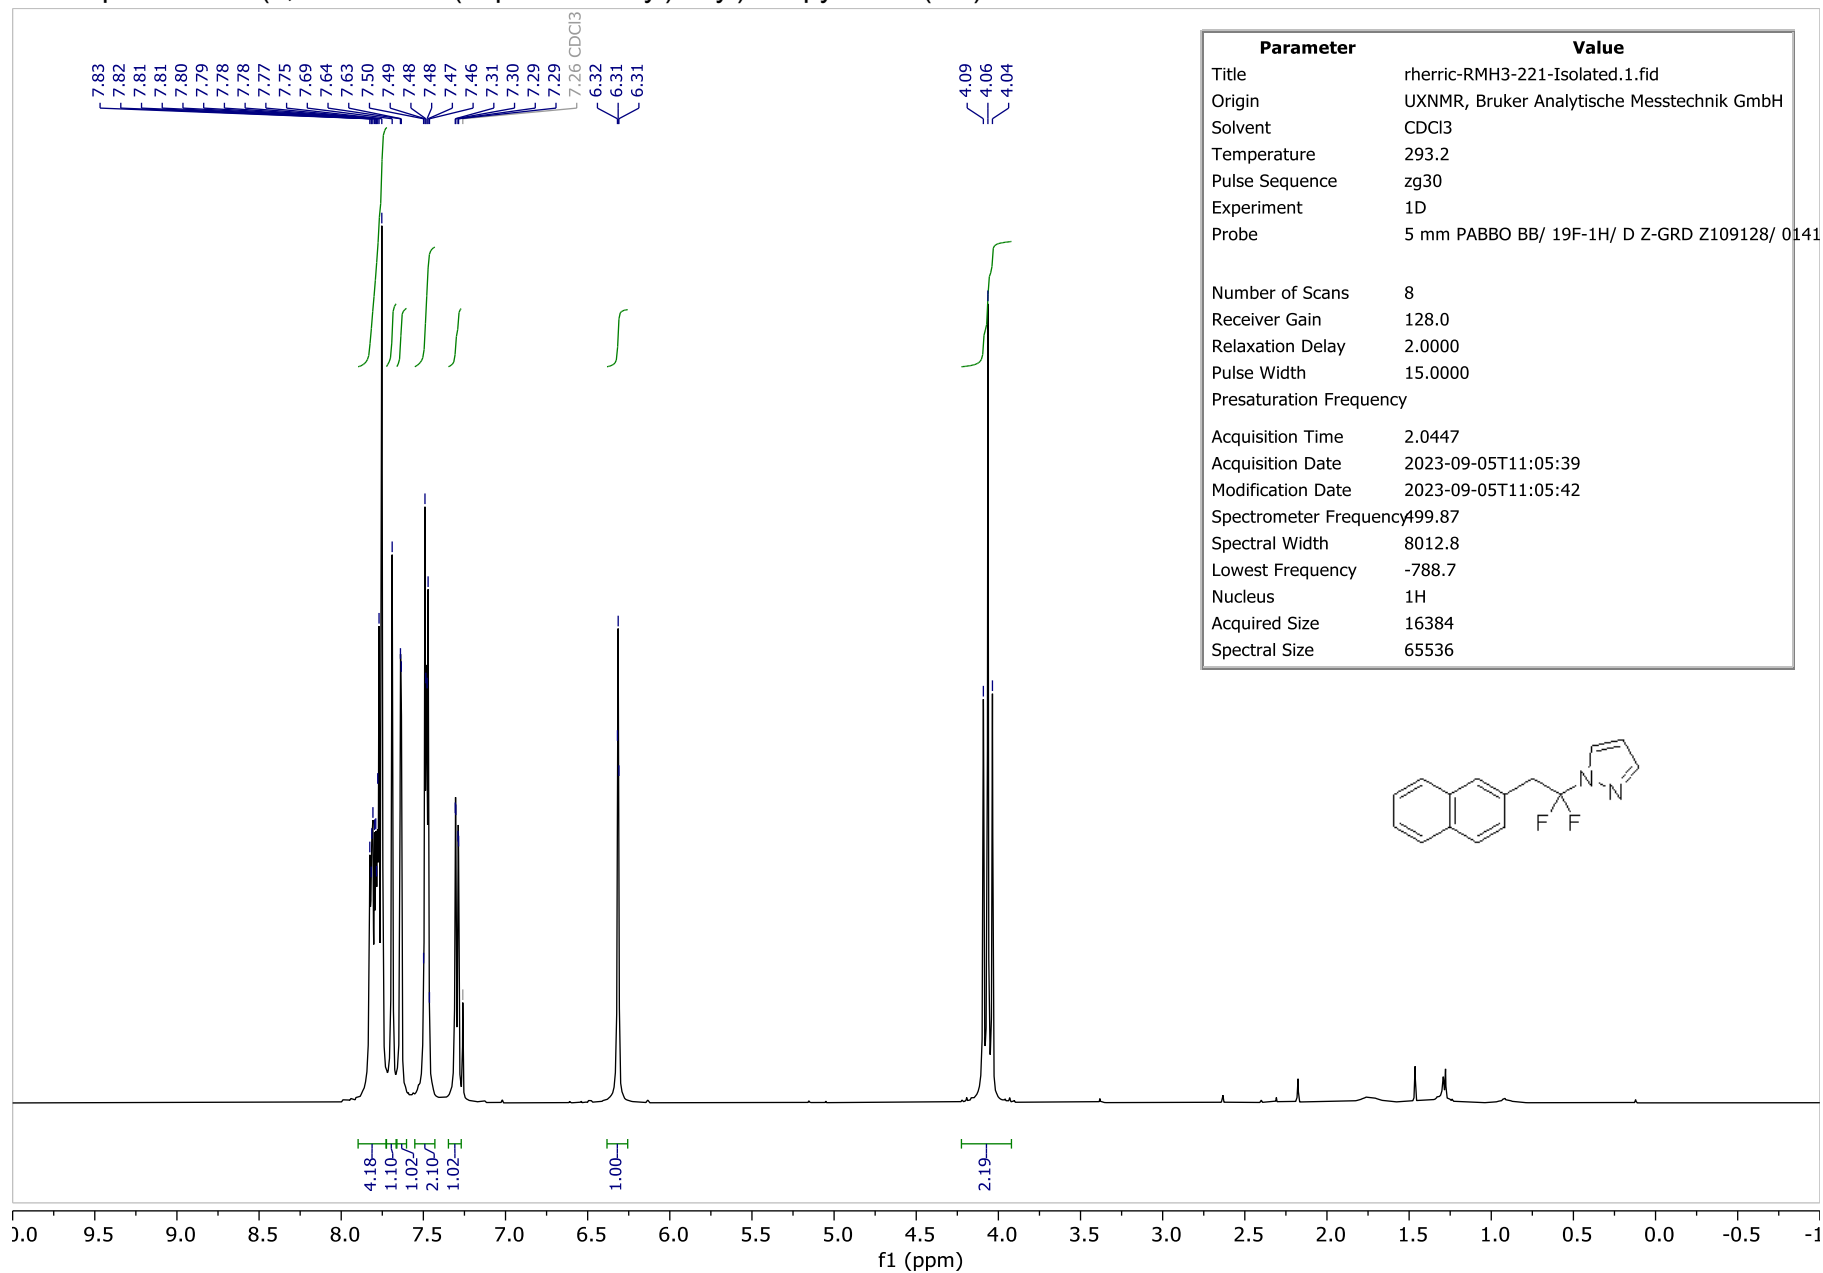

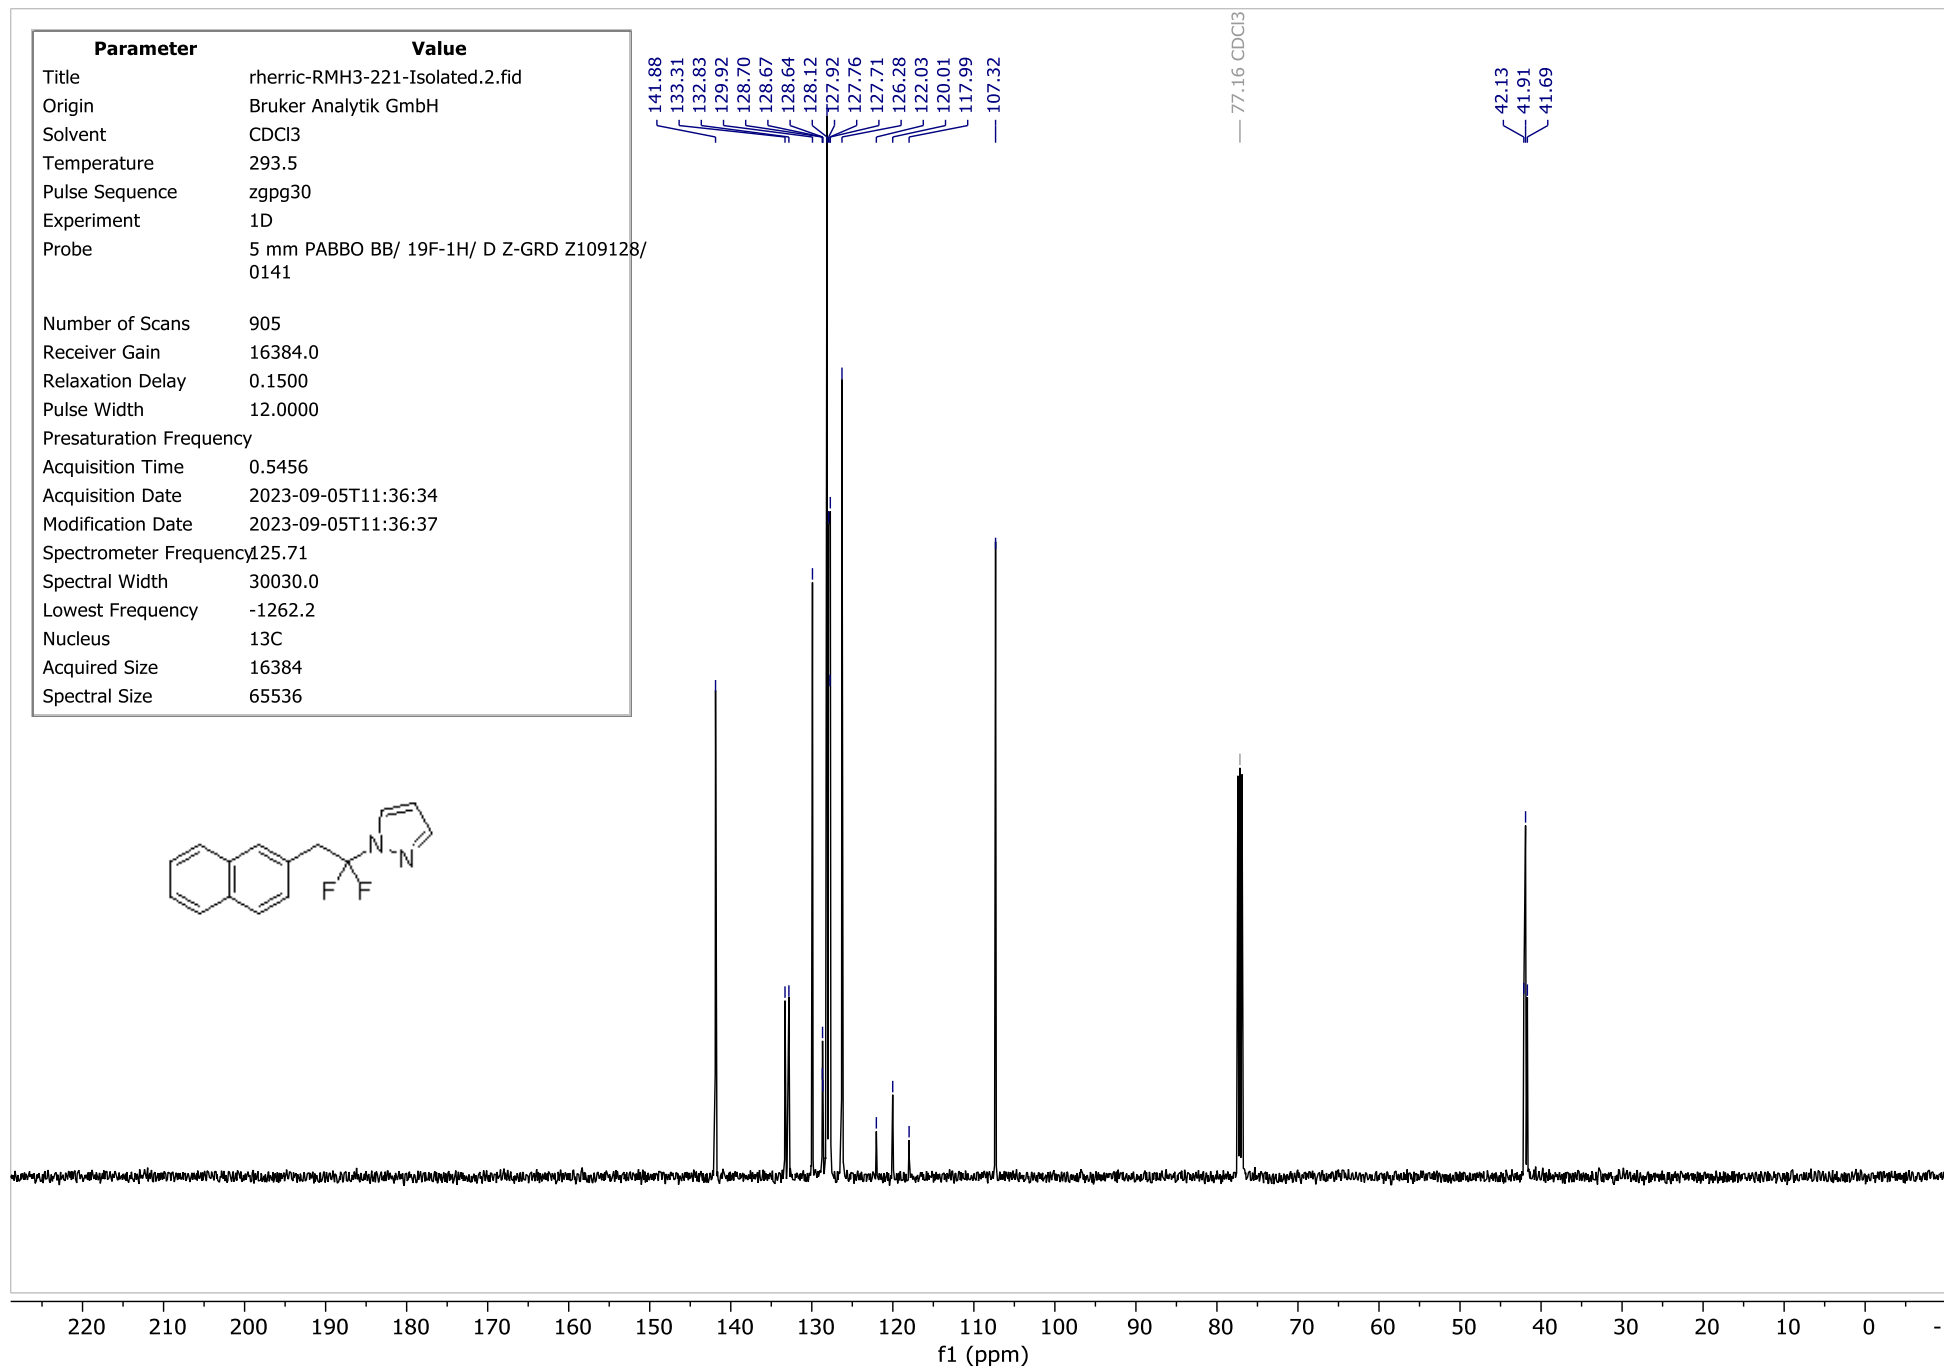

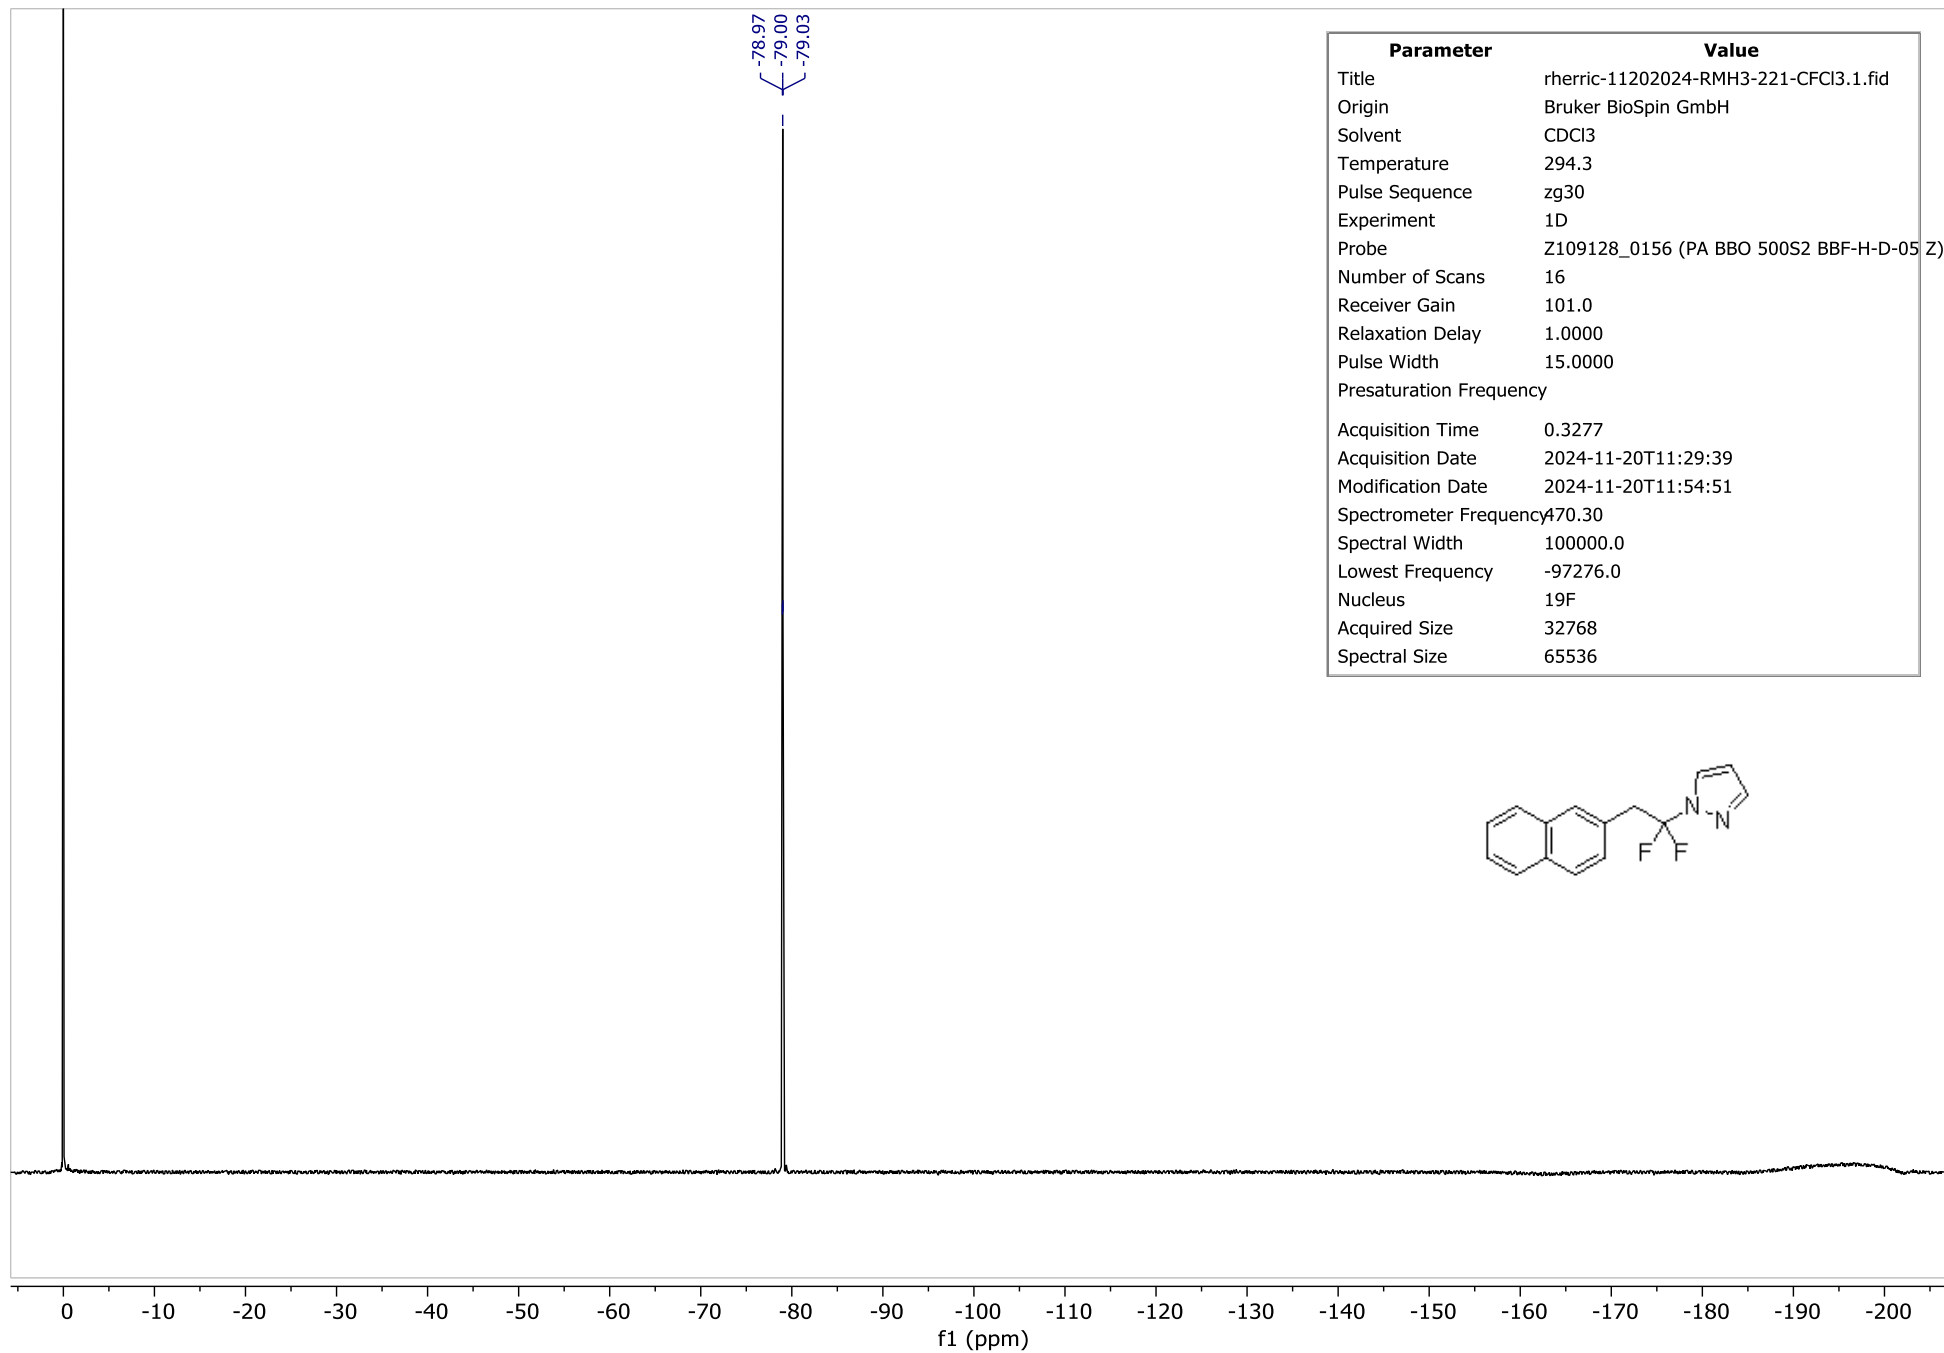

NMR spectra for *N*-(4-(2,2-difluoro-2-(1*H*-pyrazol-1-yl)ethyl)phenyl)acetamide (**11j**)

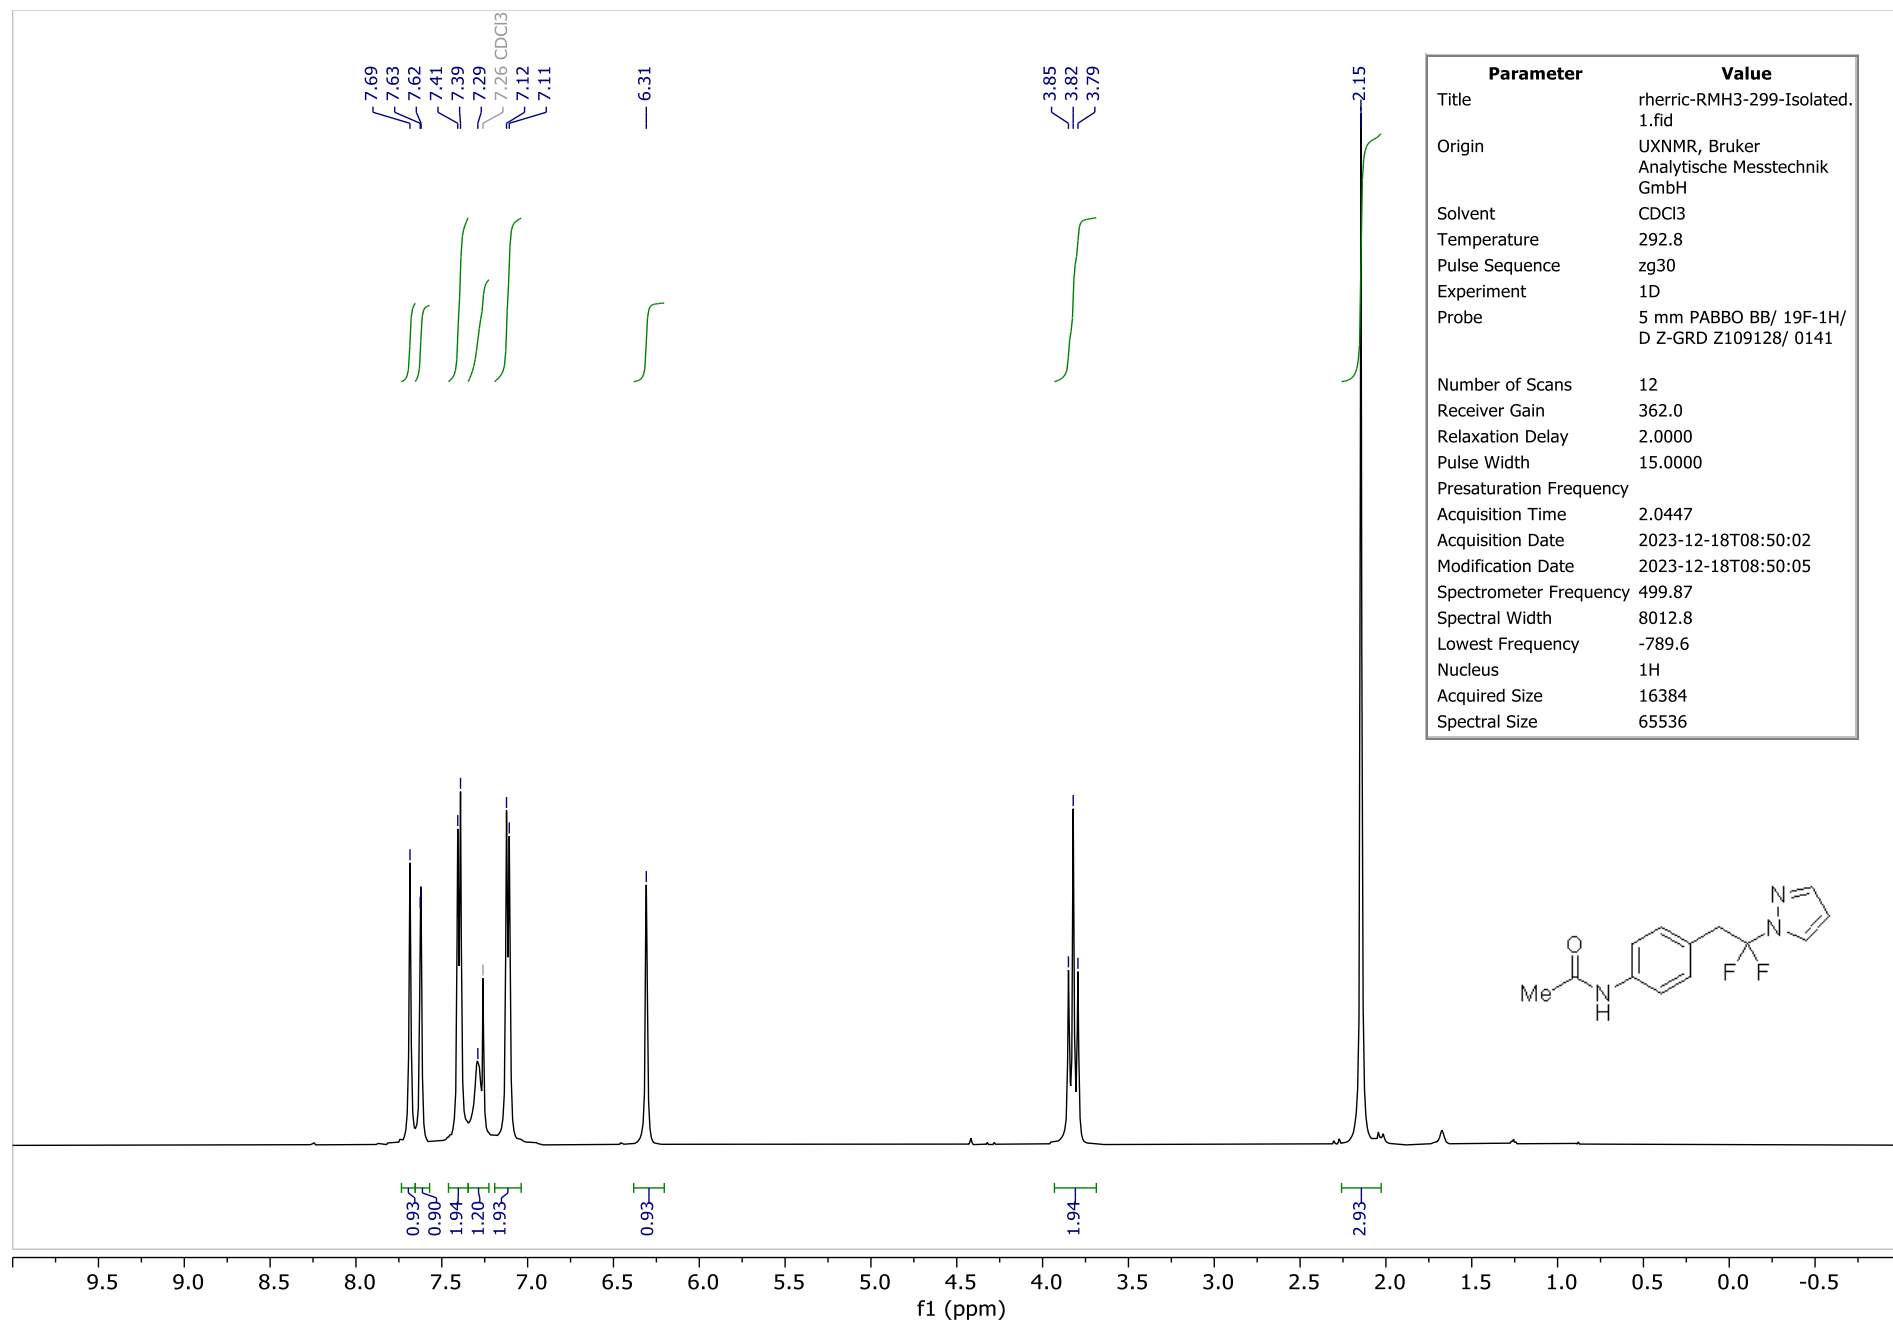

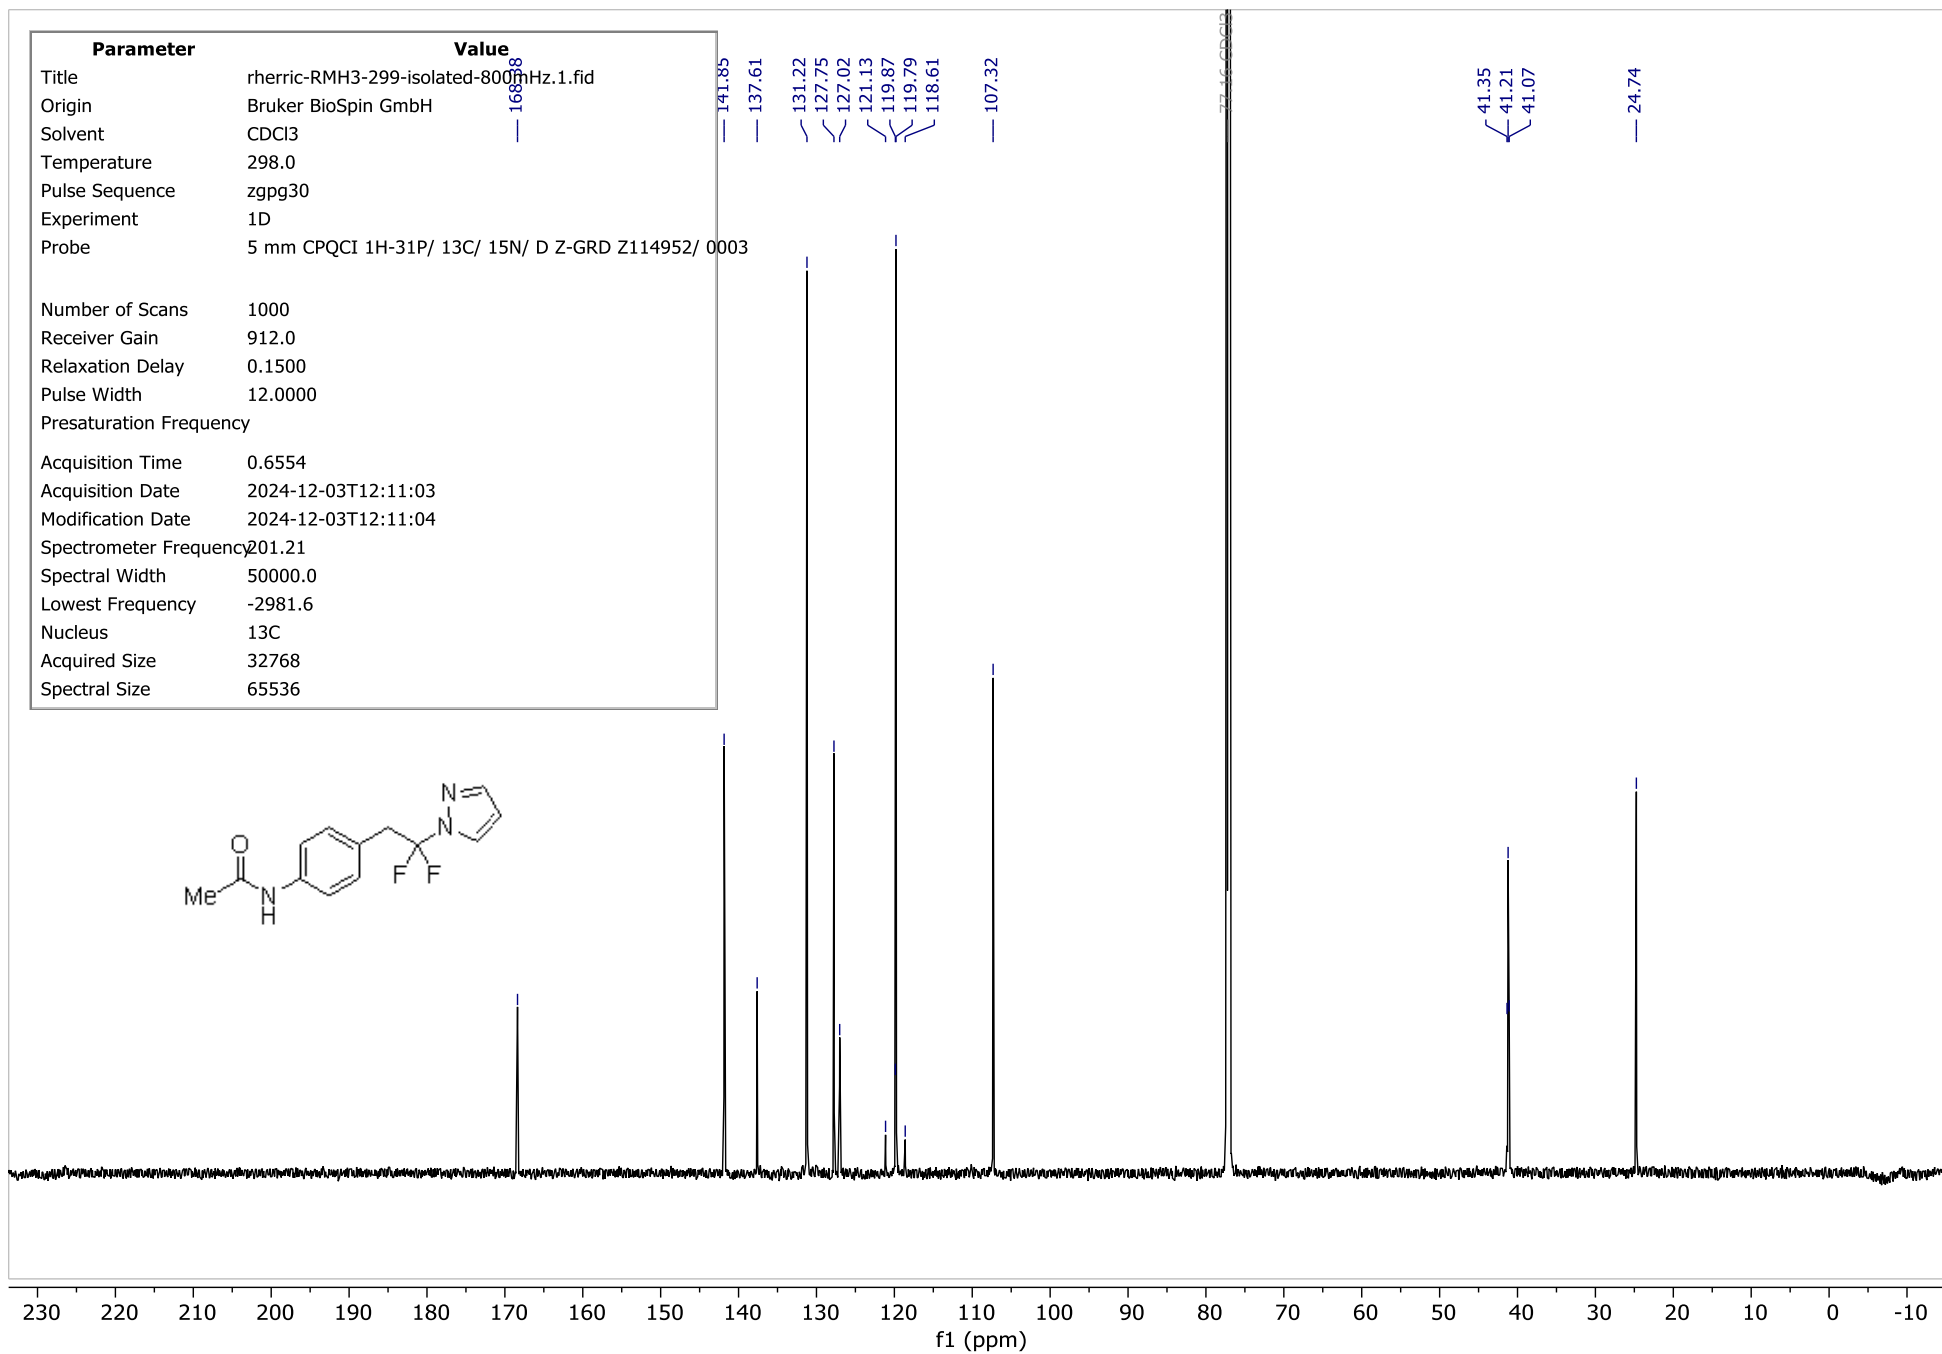

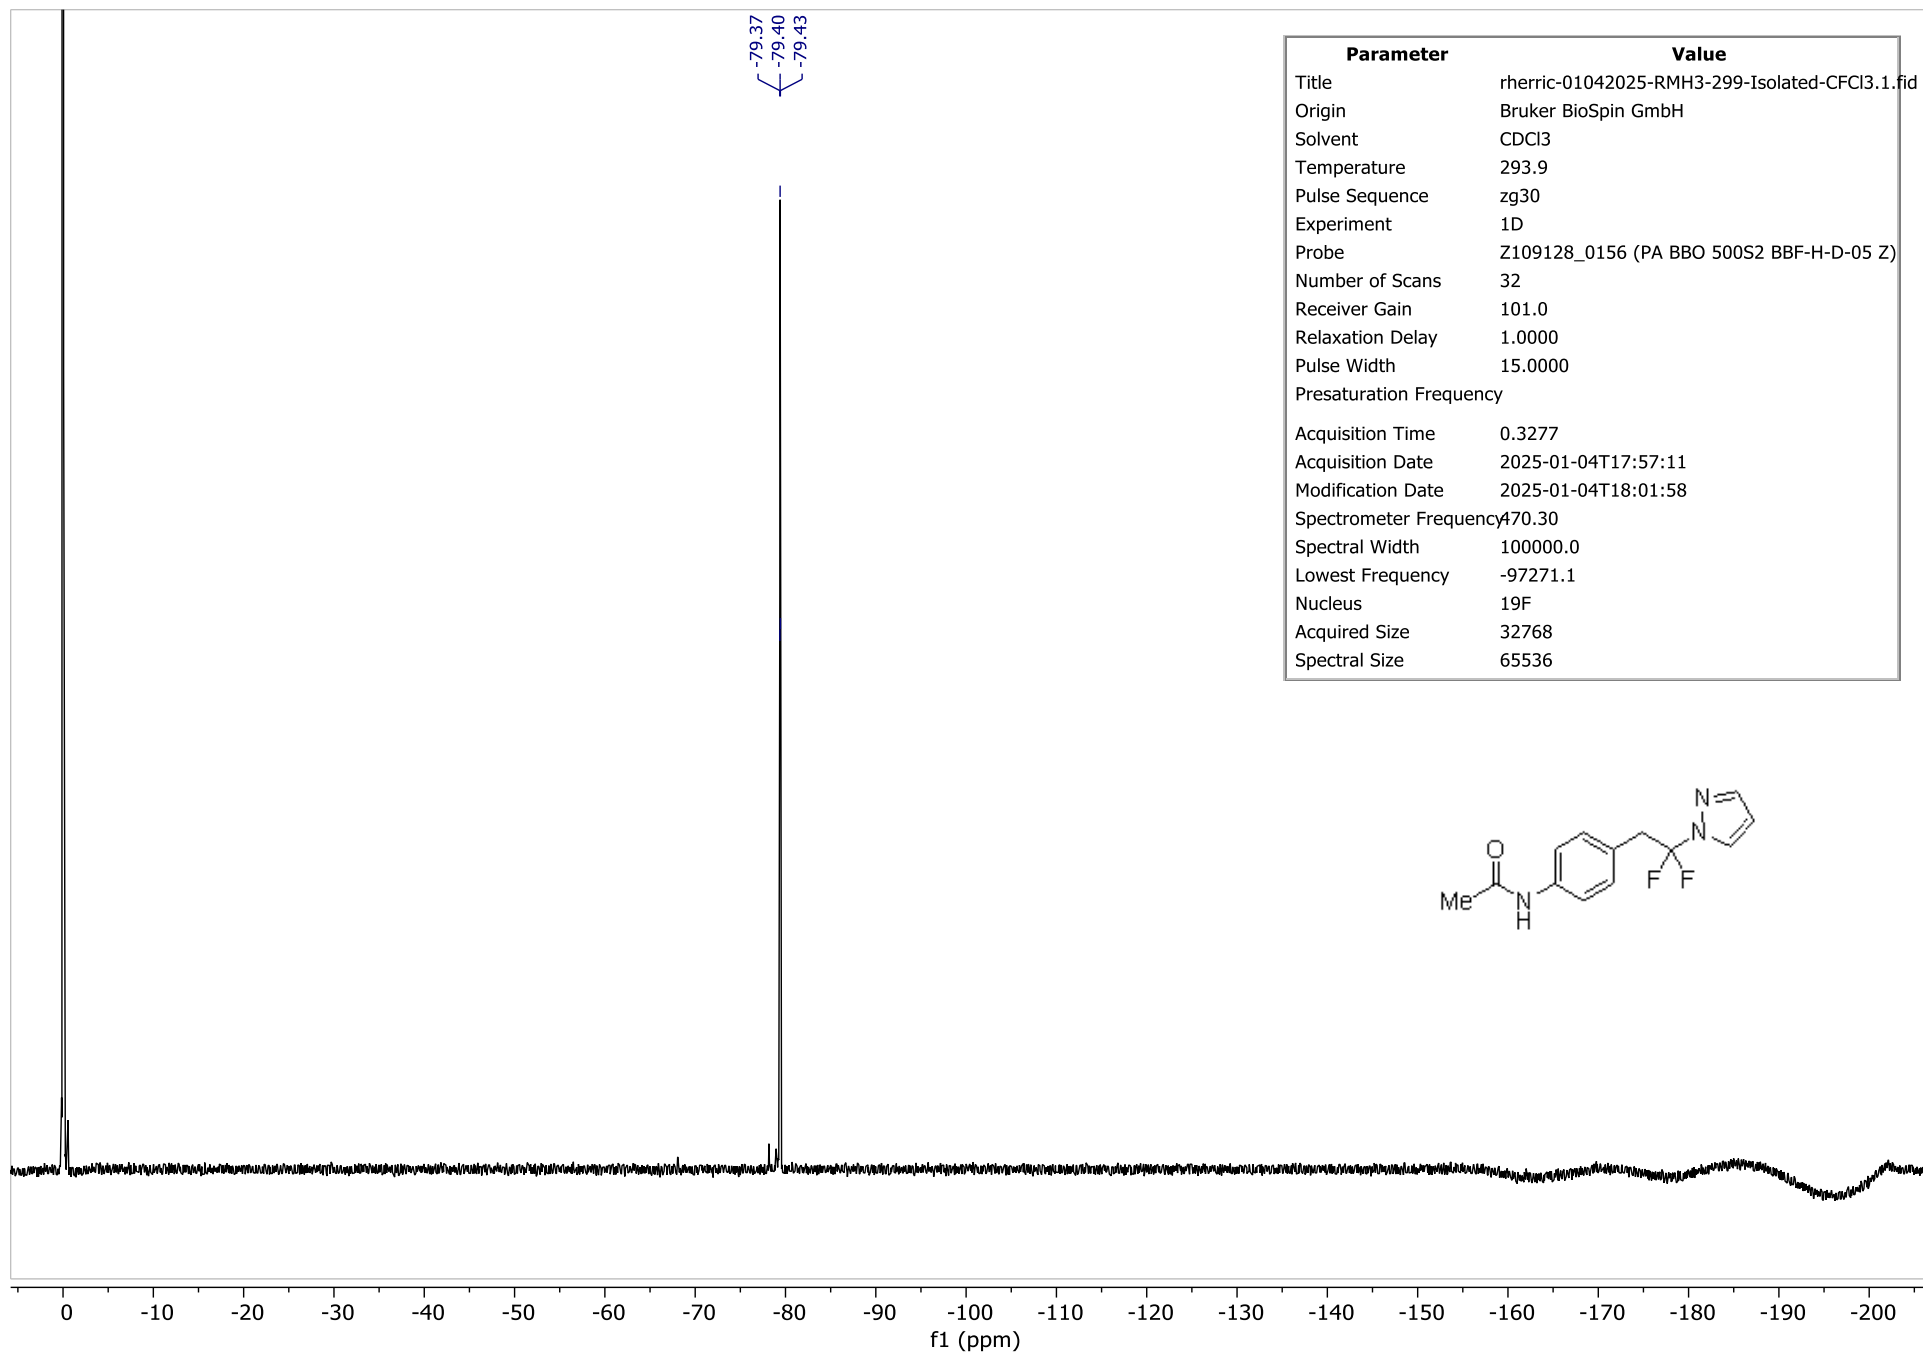

NMR spectra for 1-(1,1-difluoro-2-(4-(methylthio)phenyl)ethyl)-1*H*-pyrazole (**11k**)

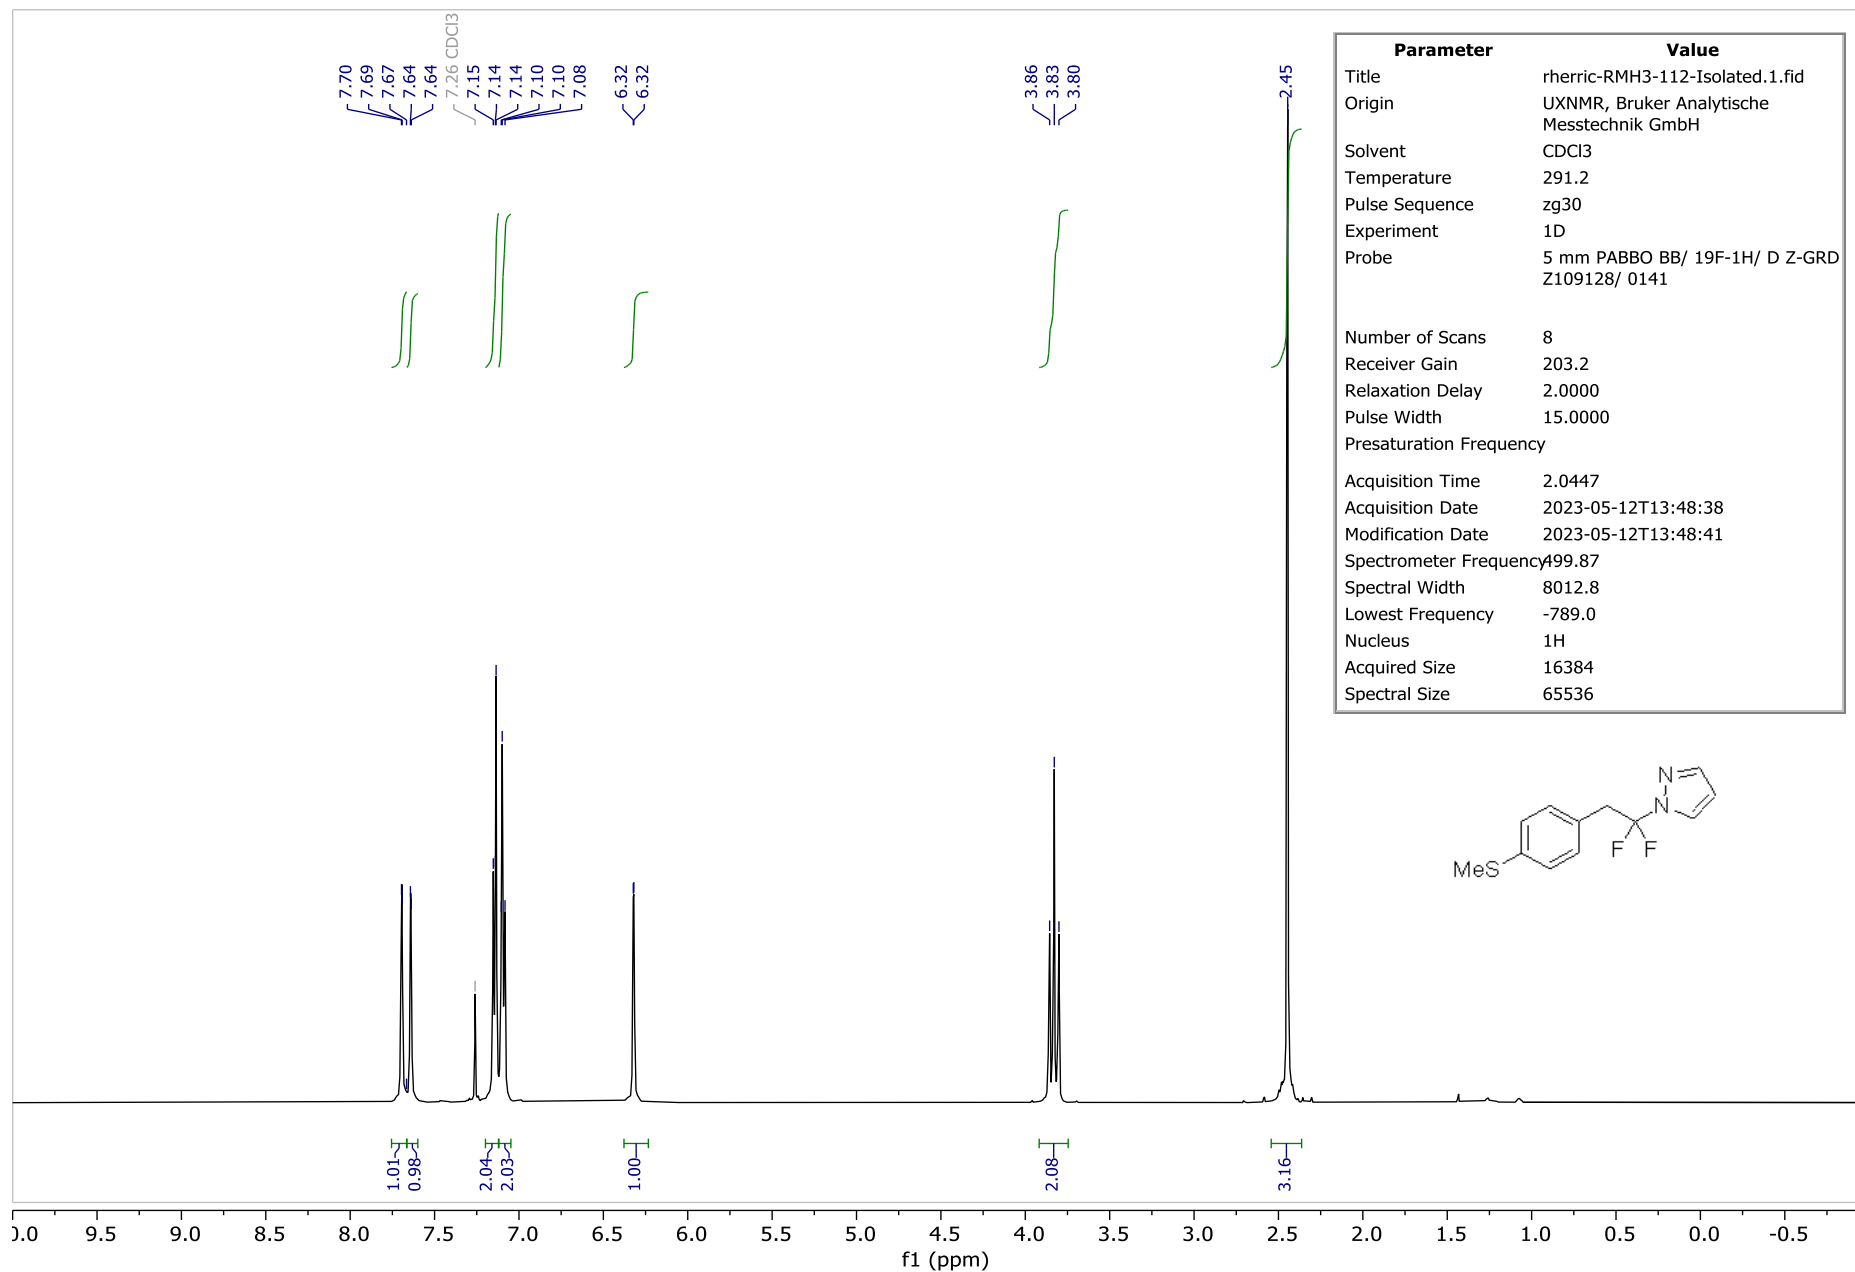

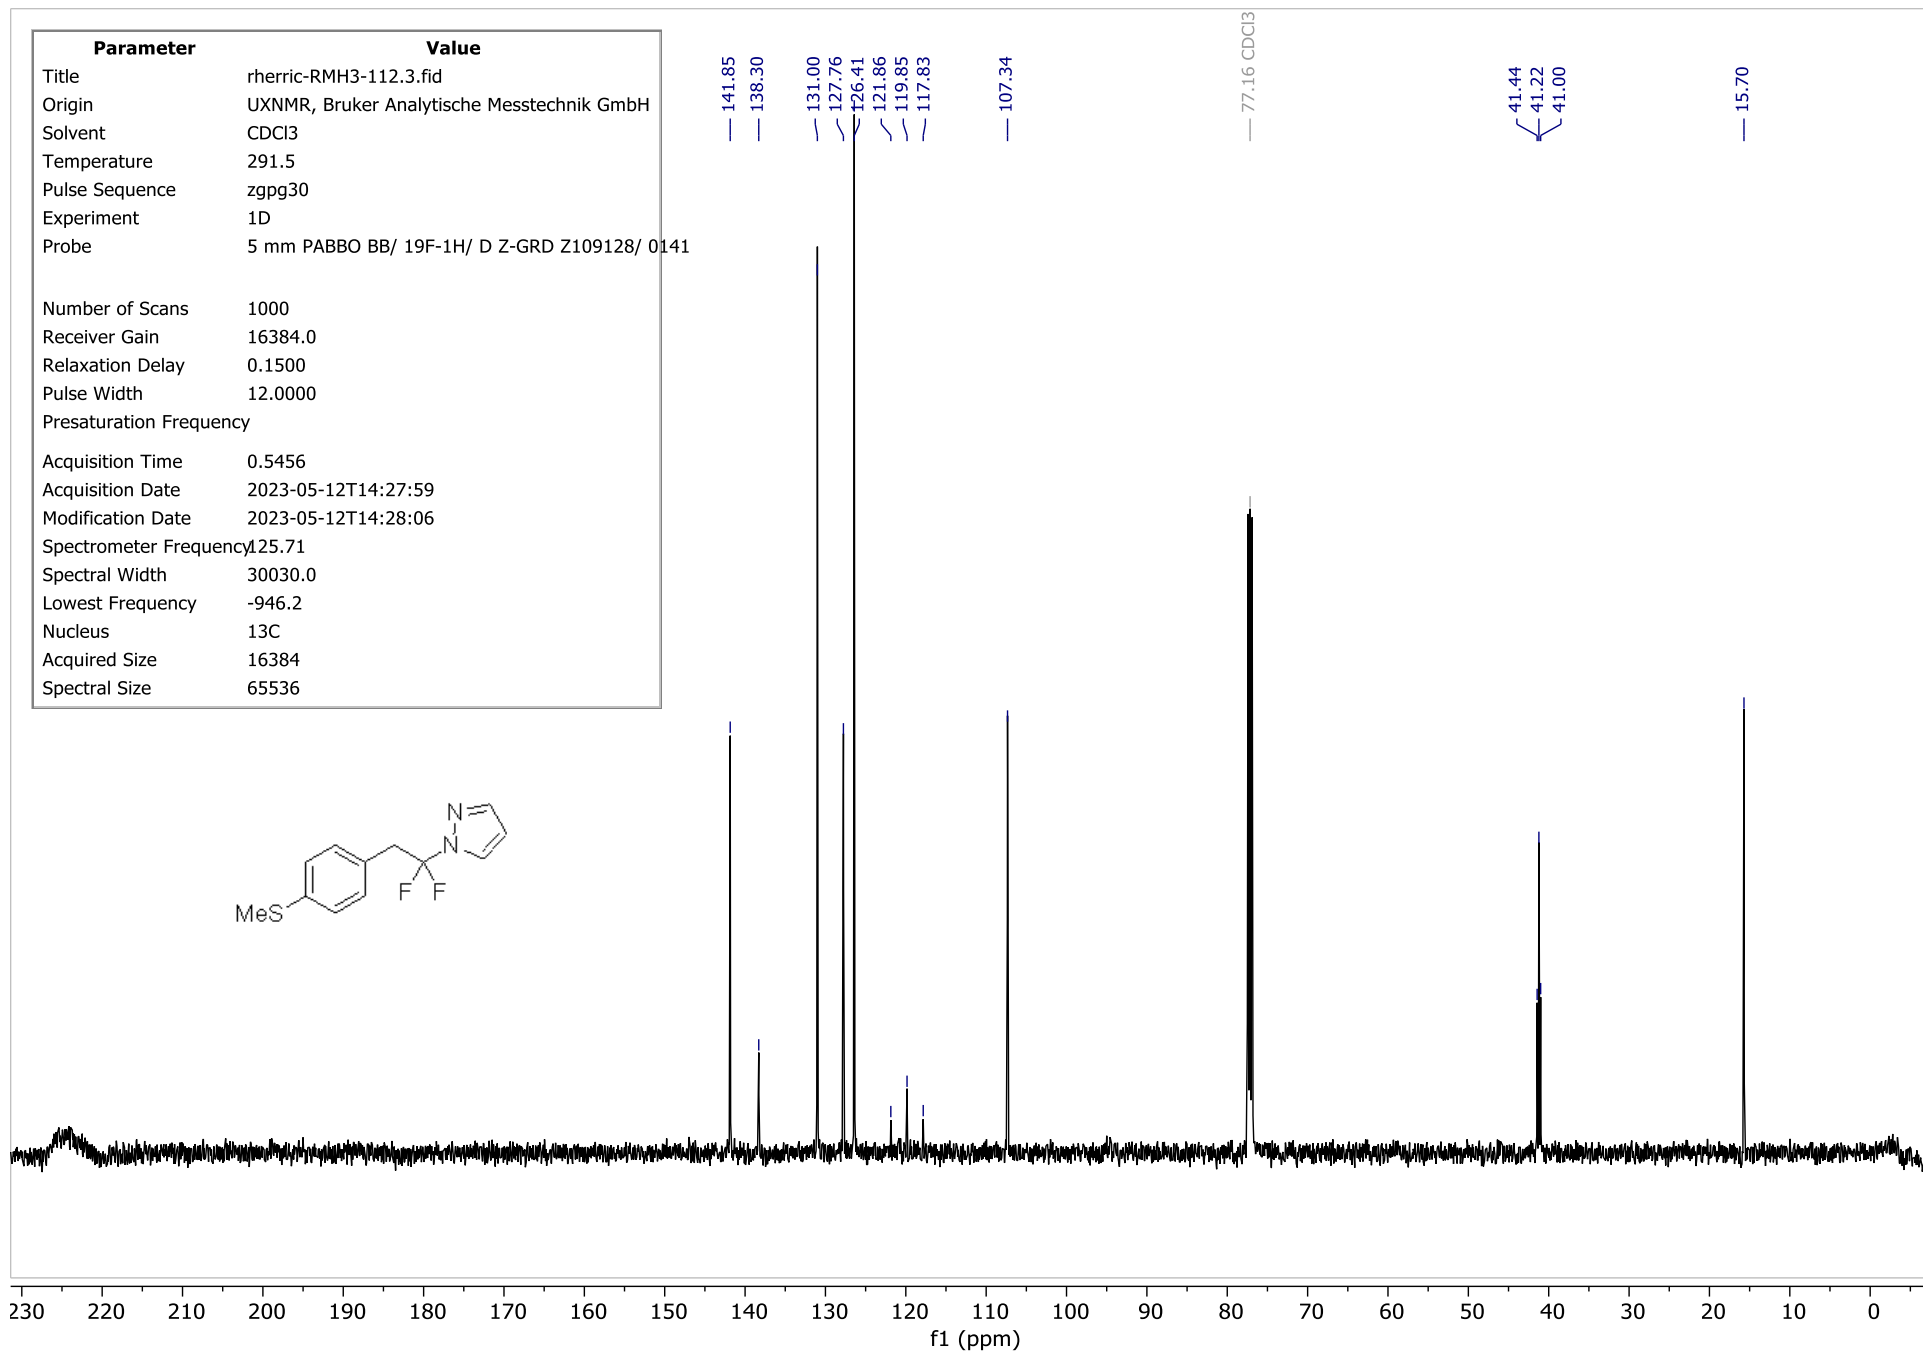



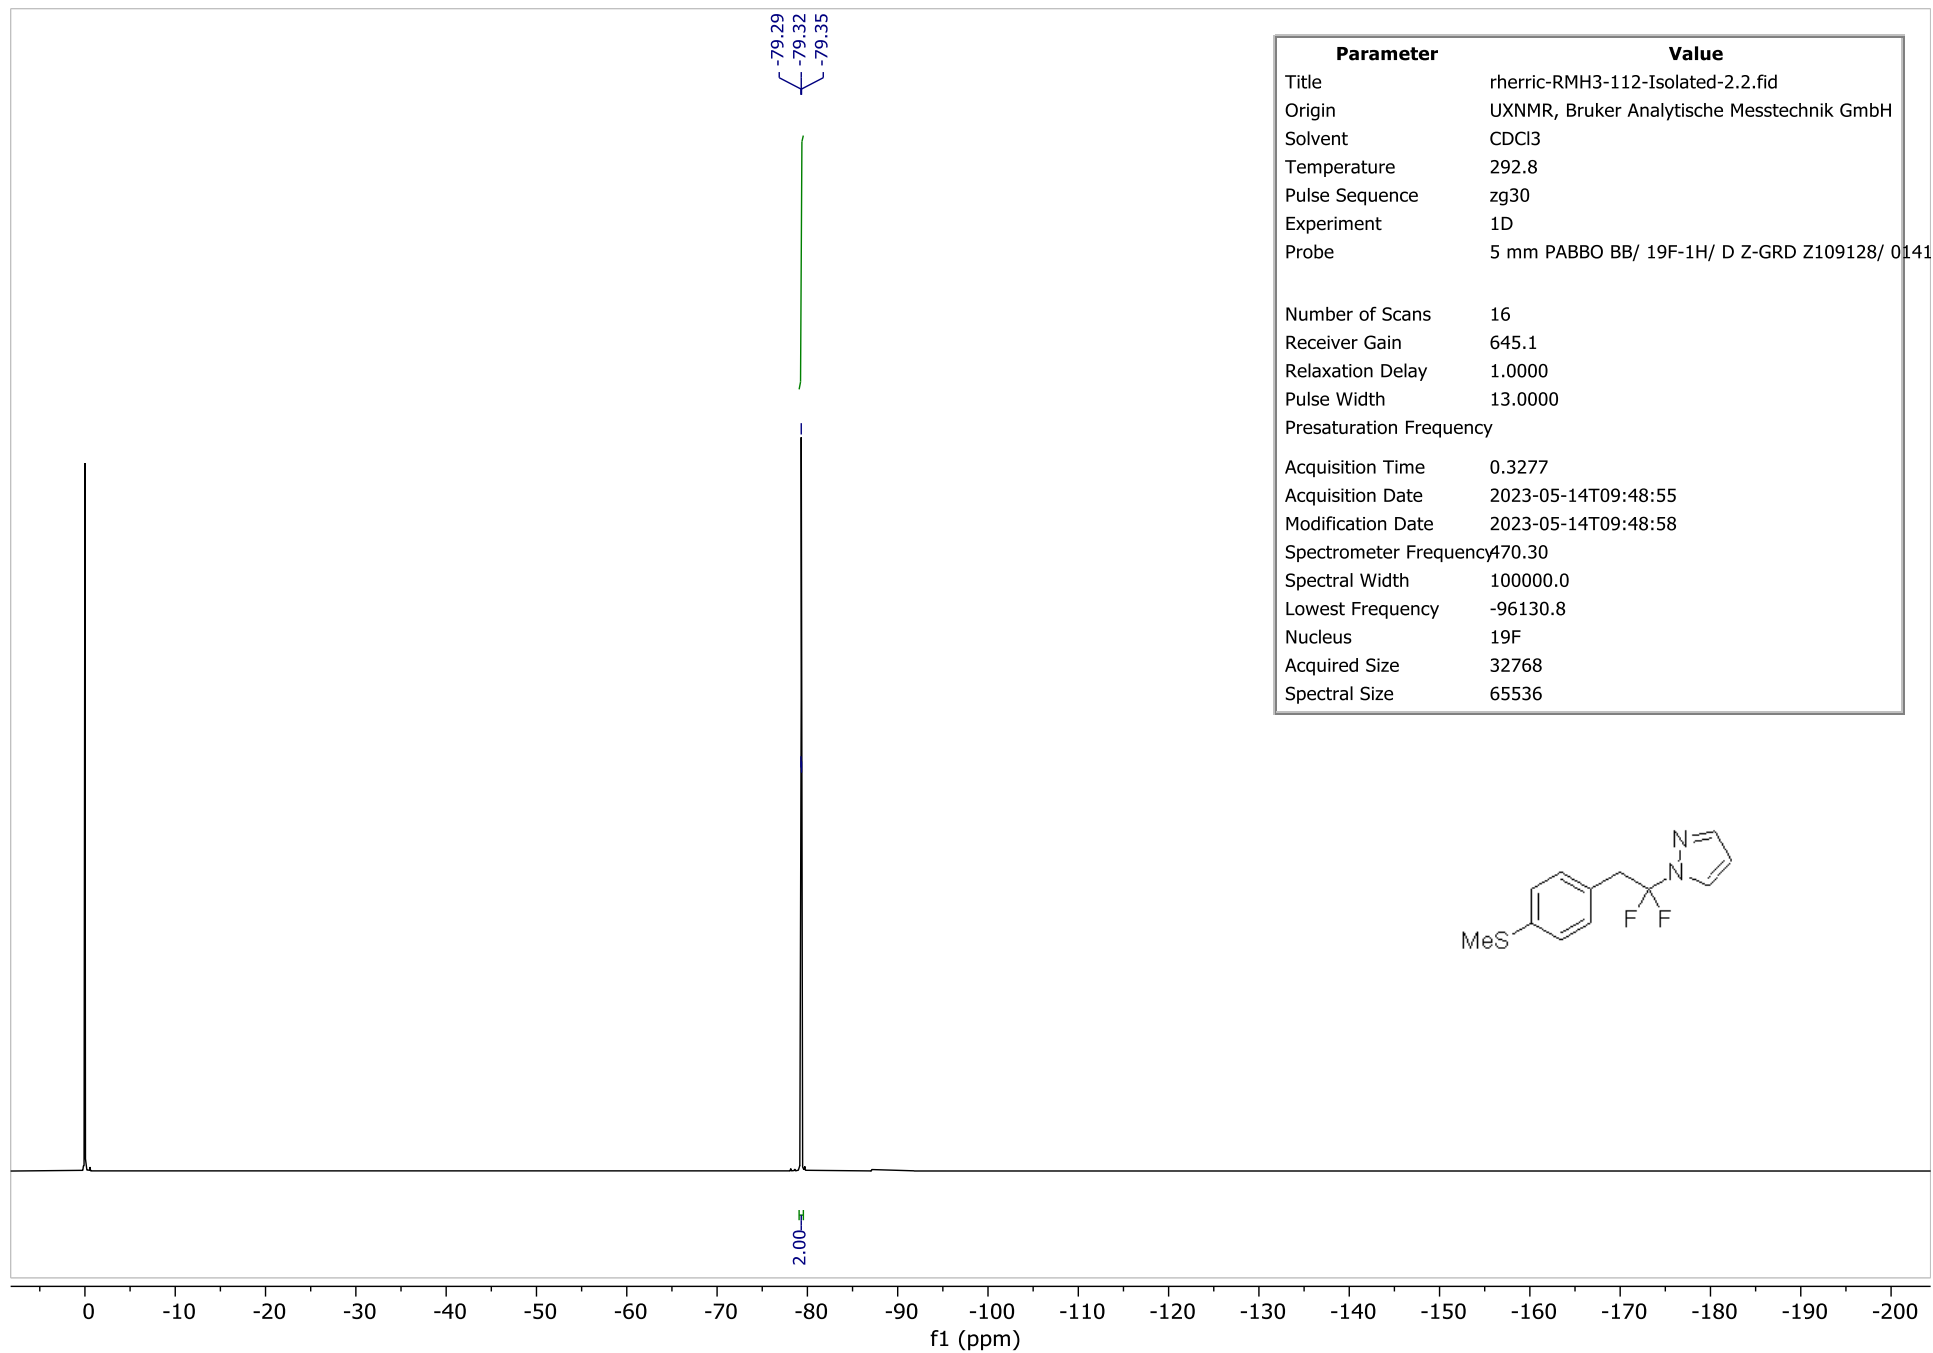

# NMR spectra for 1-(2-(4-(benzyloxy)phenyl)-1,1-difluoroethyl)-1H-pyrazole (11I)

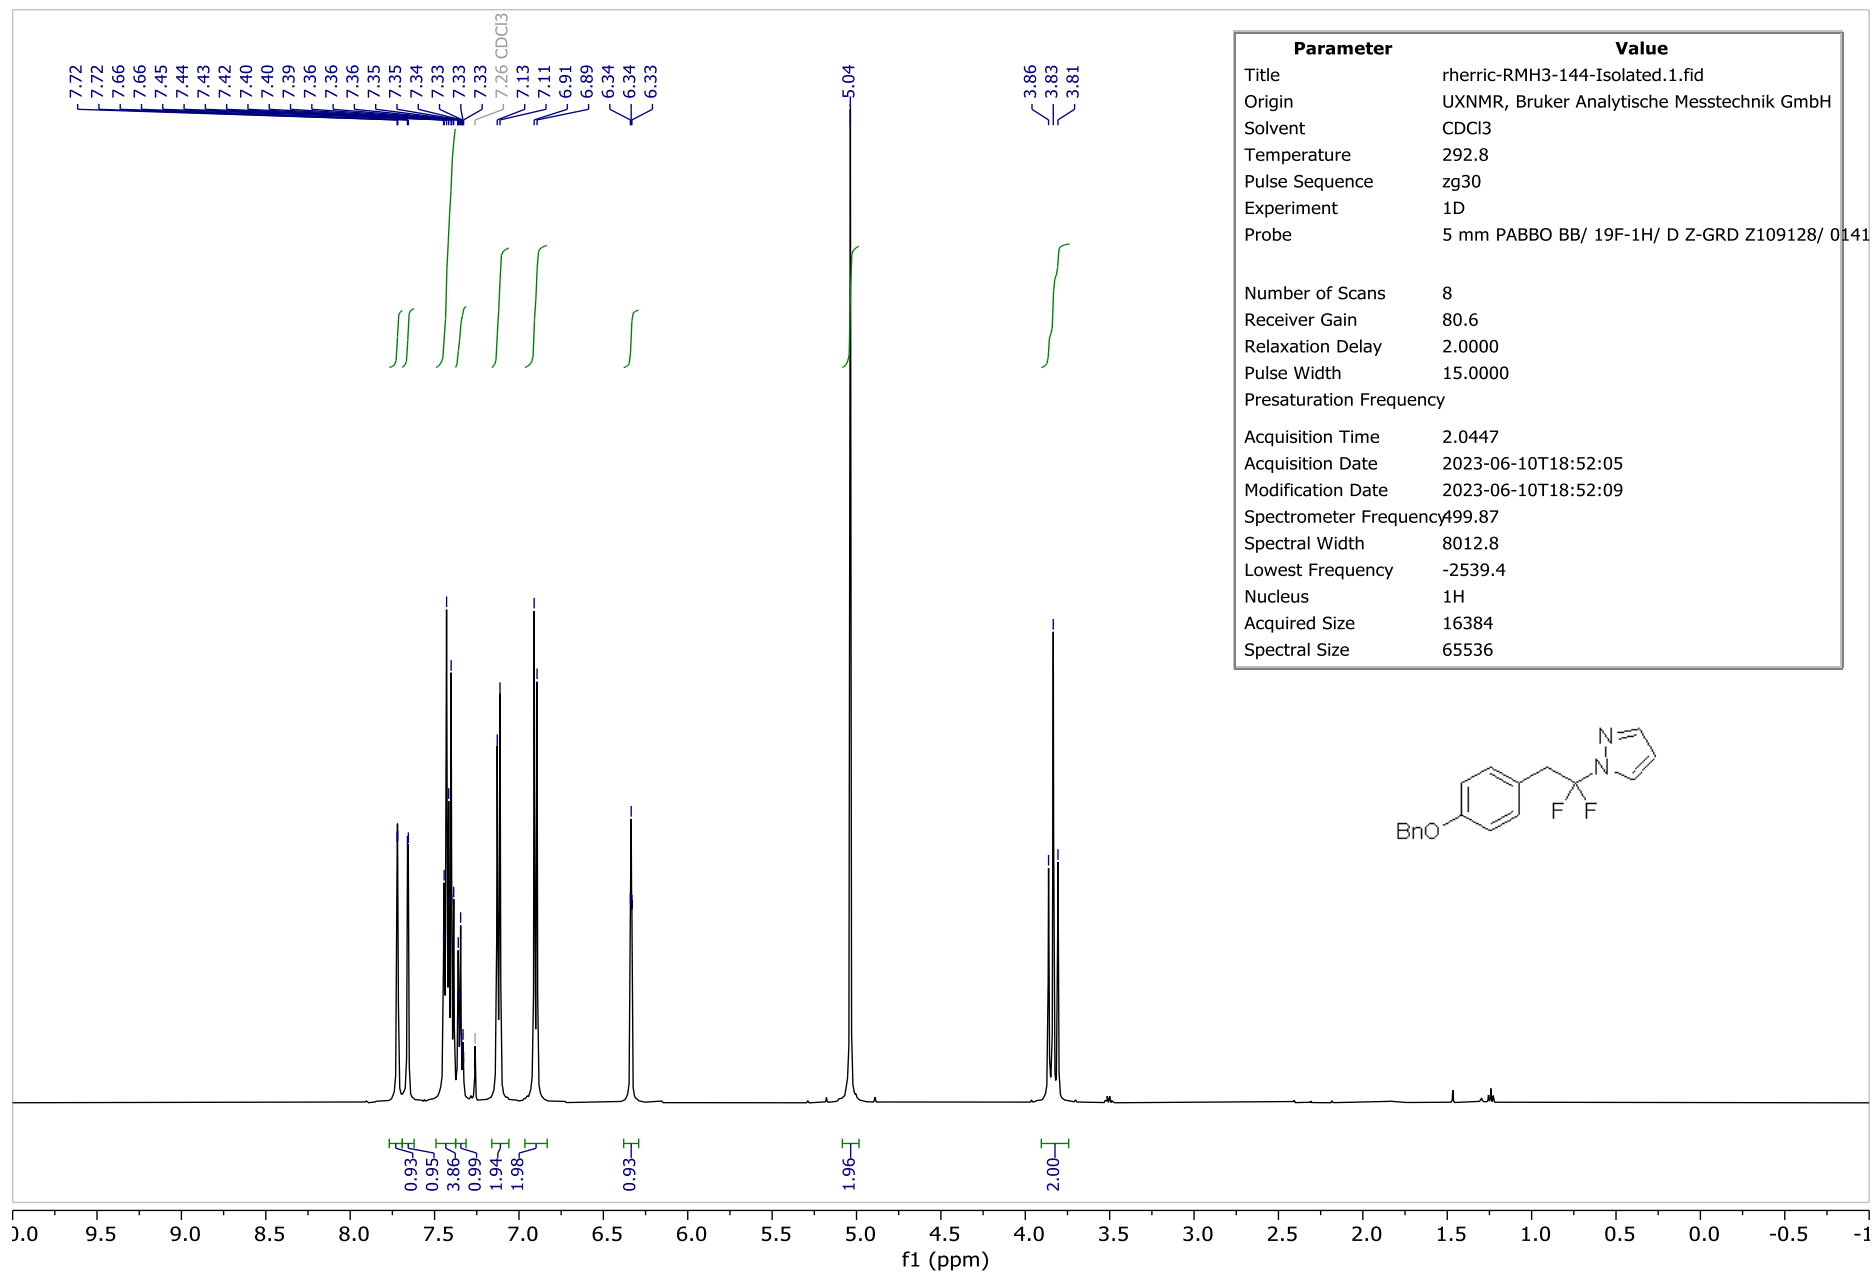

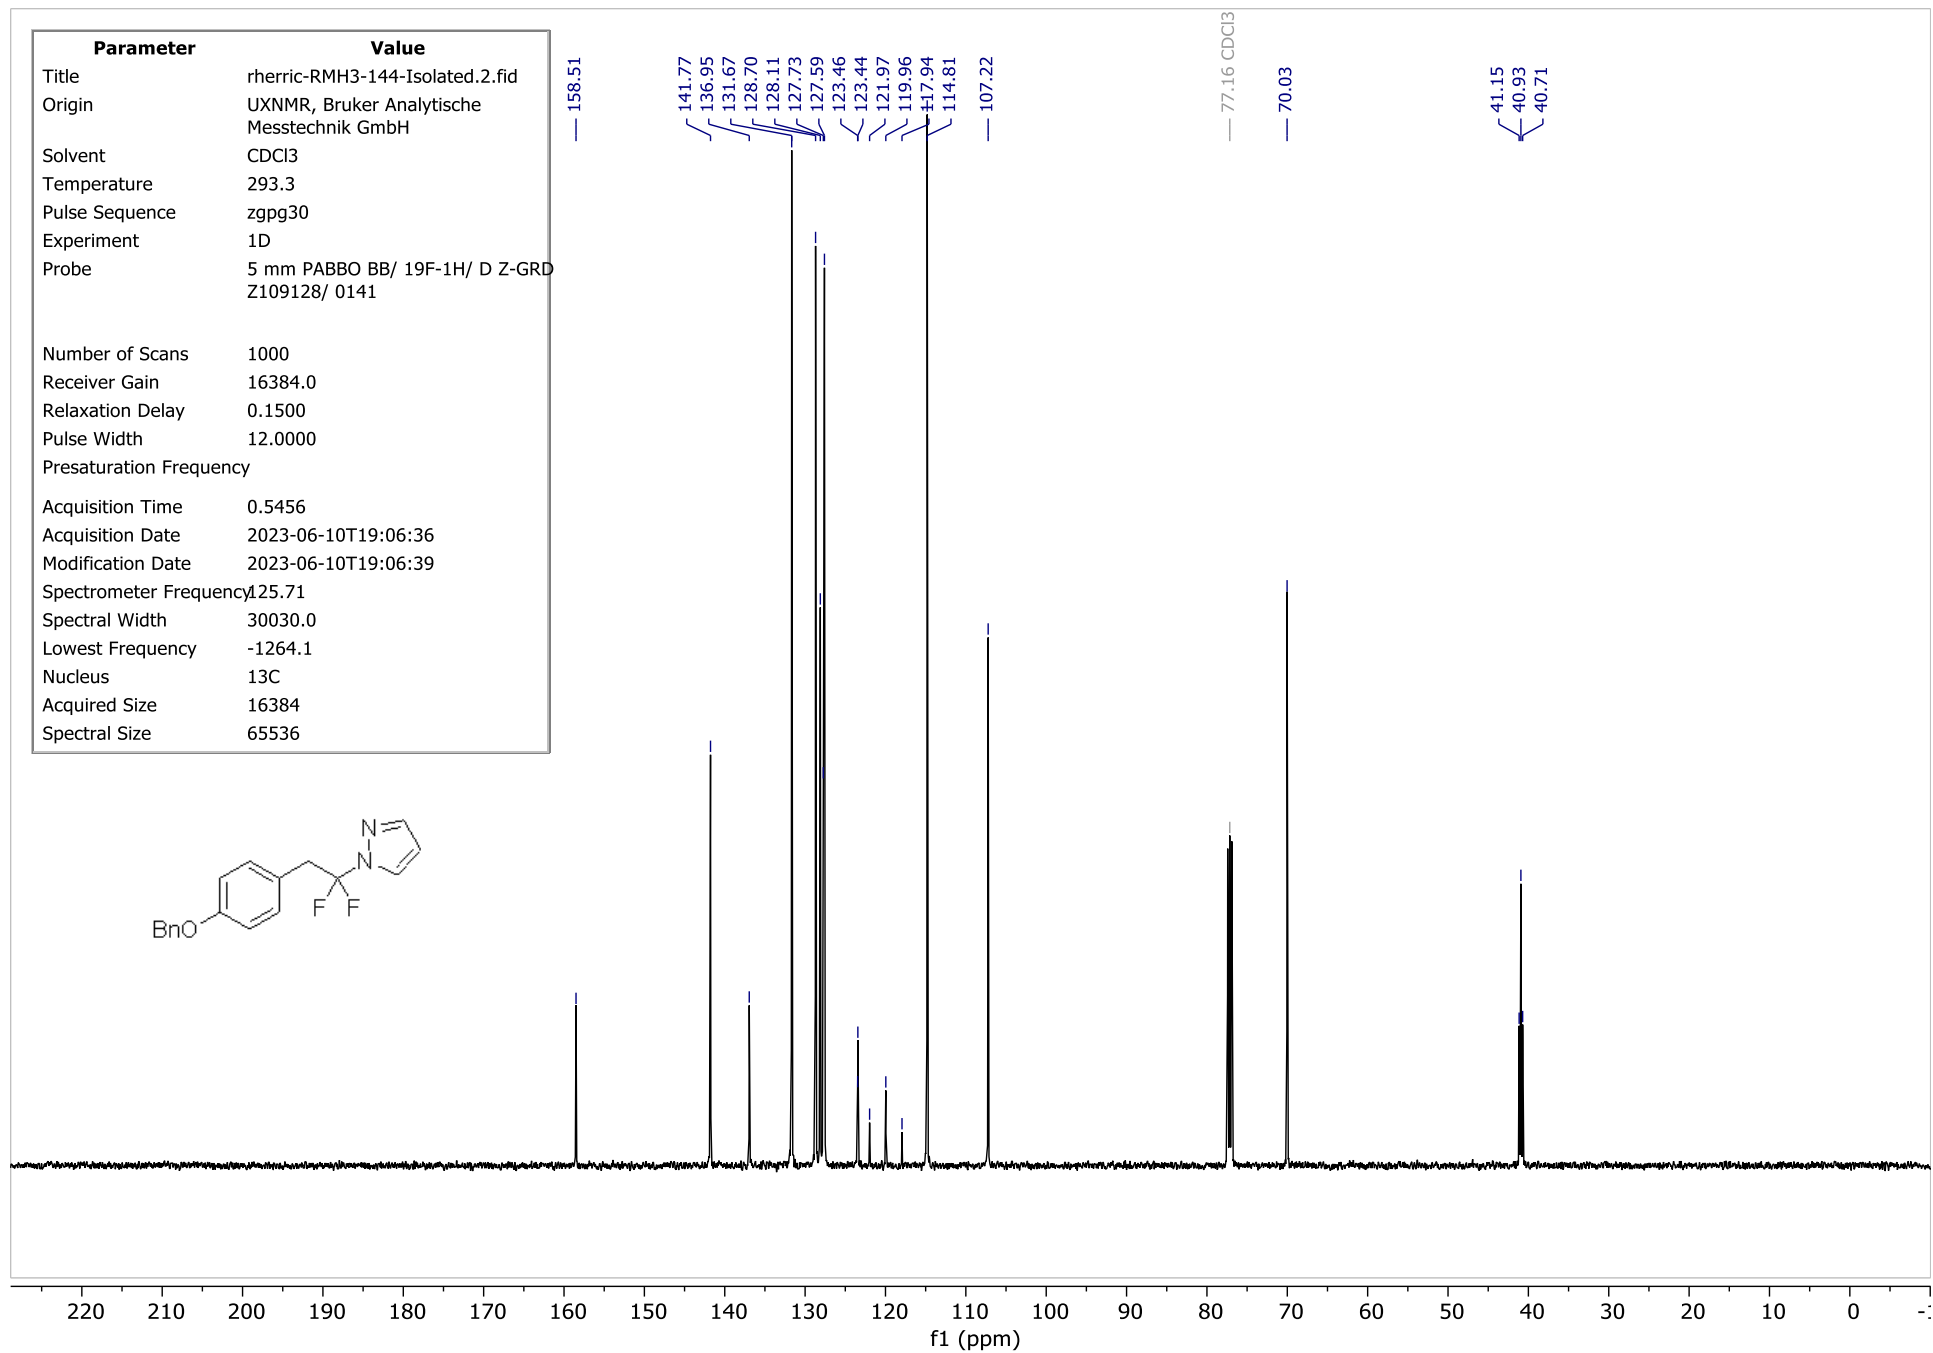

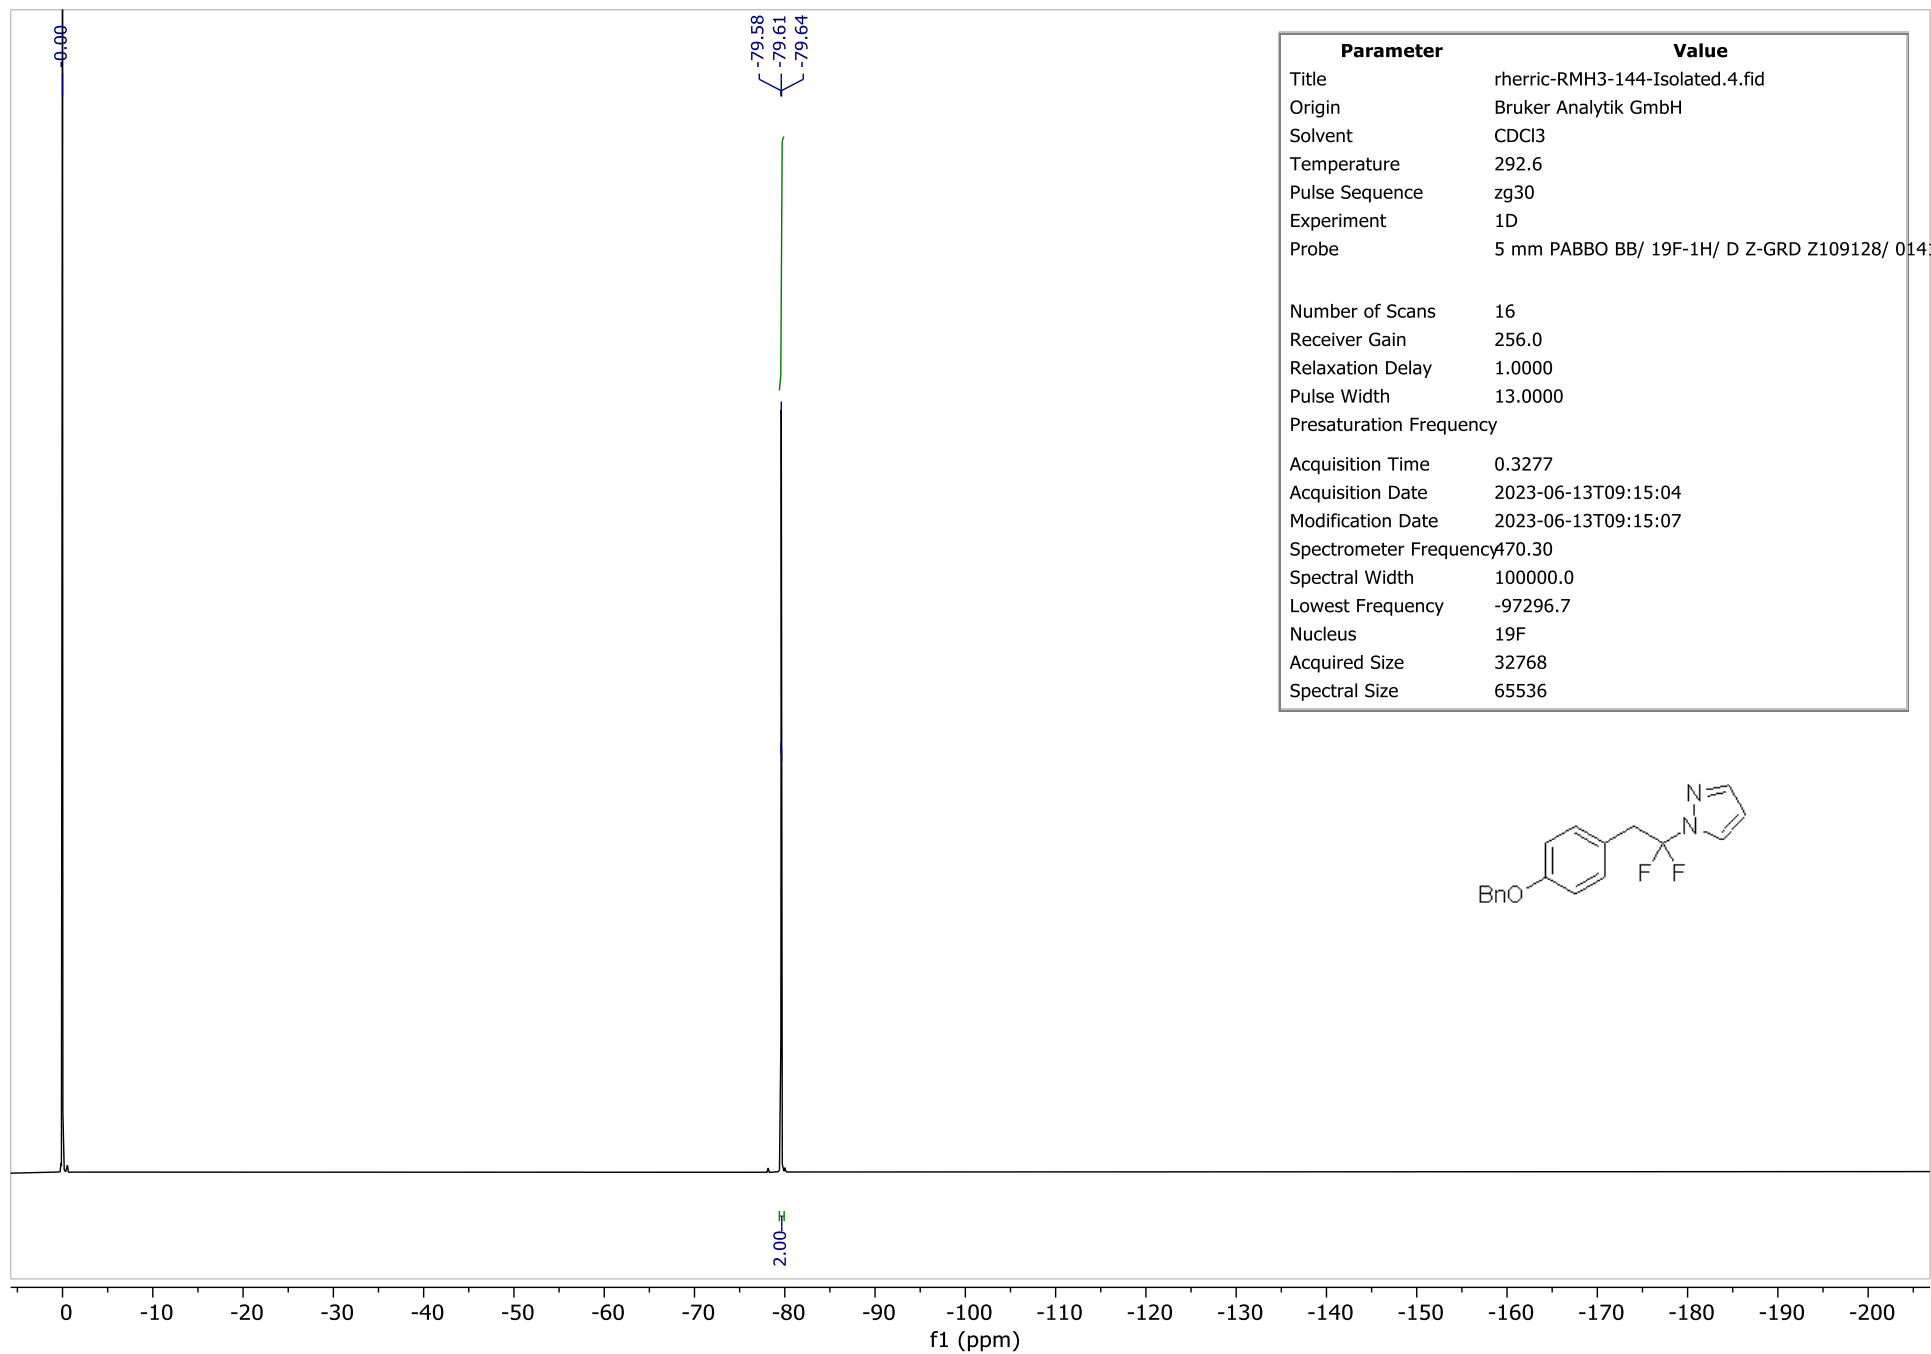

NMR spectra for 1-(2-(3-(benzyloxy)phenyl)-1,1-difluoroethyl)-1H-pyrazole (**11m**)

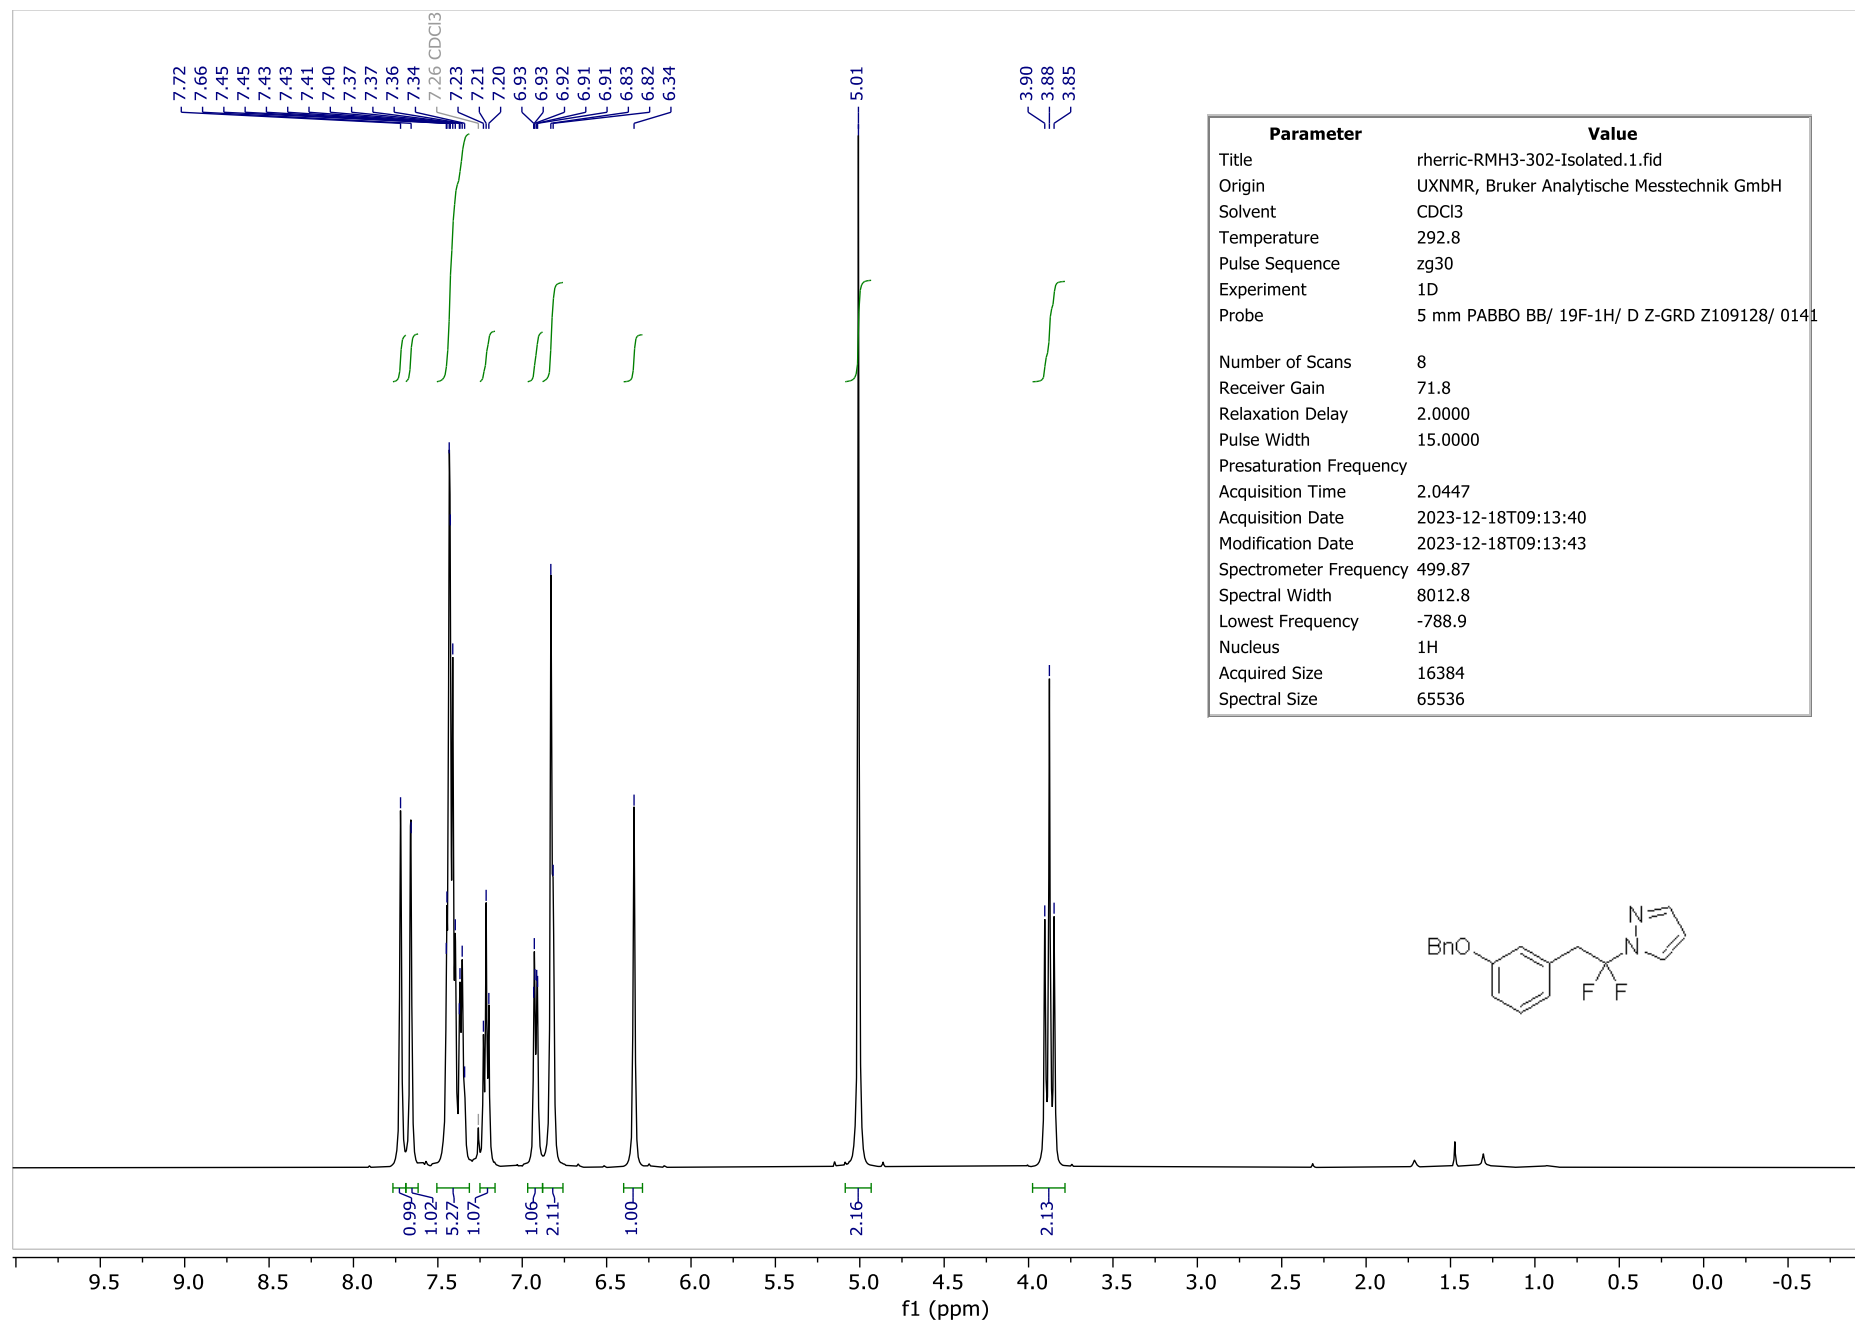

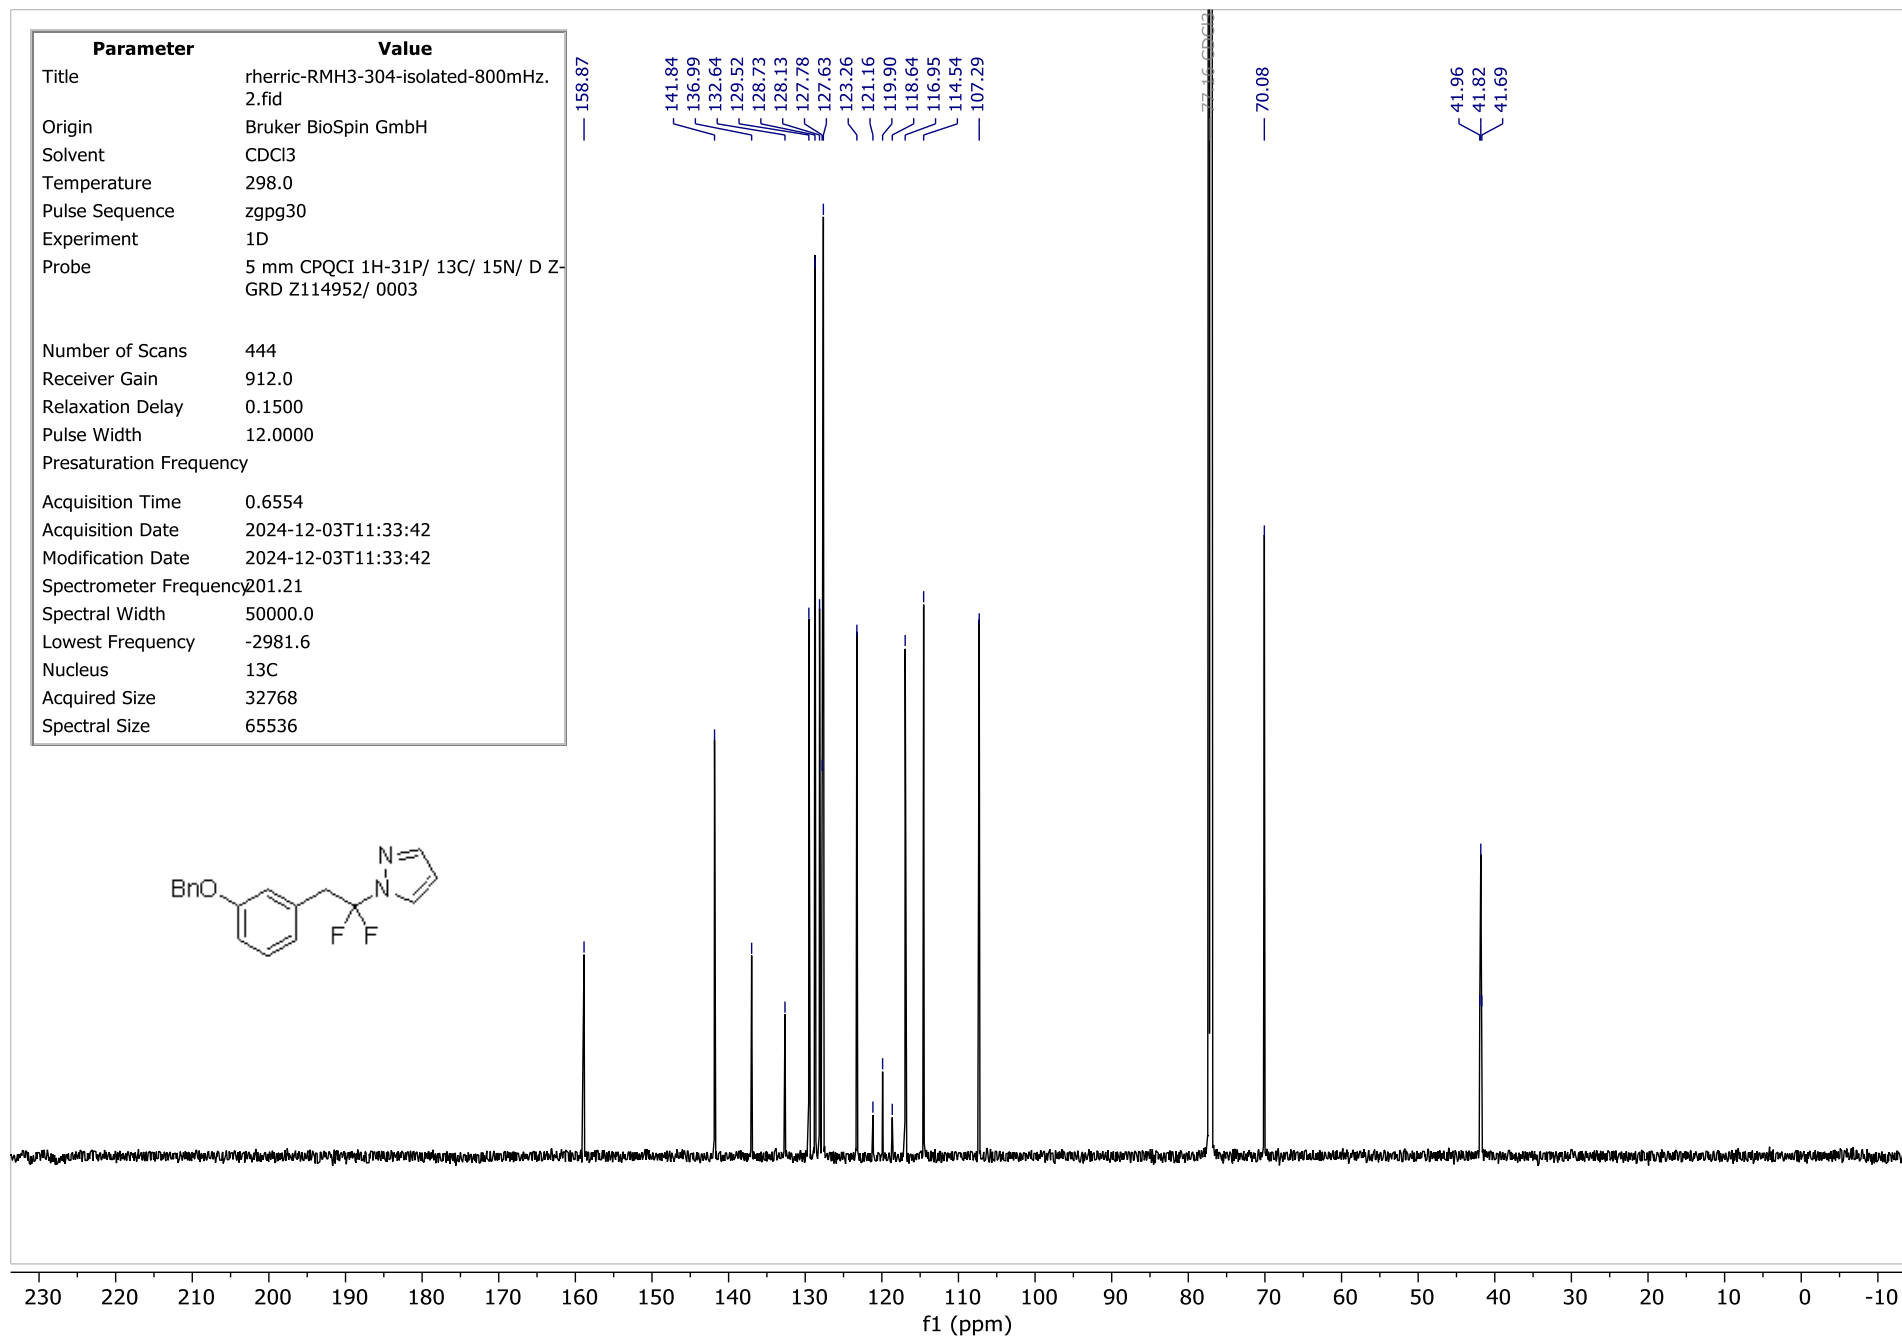

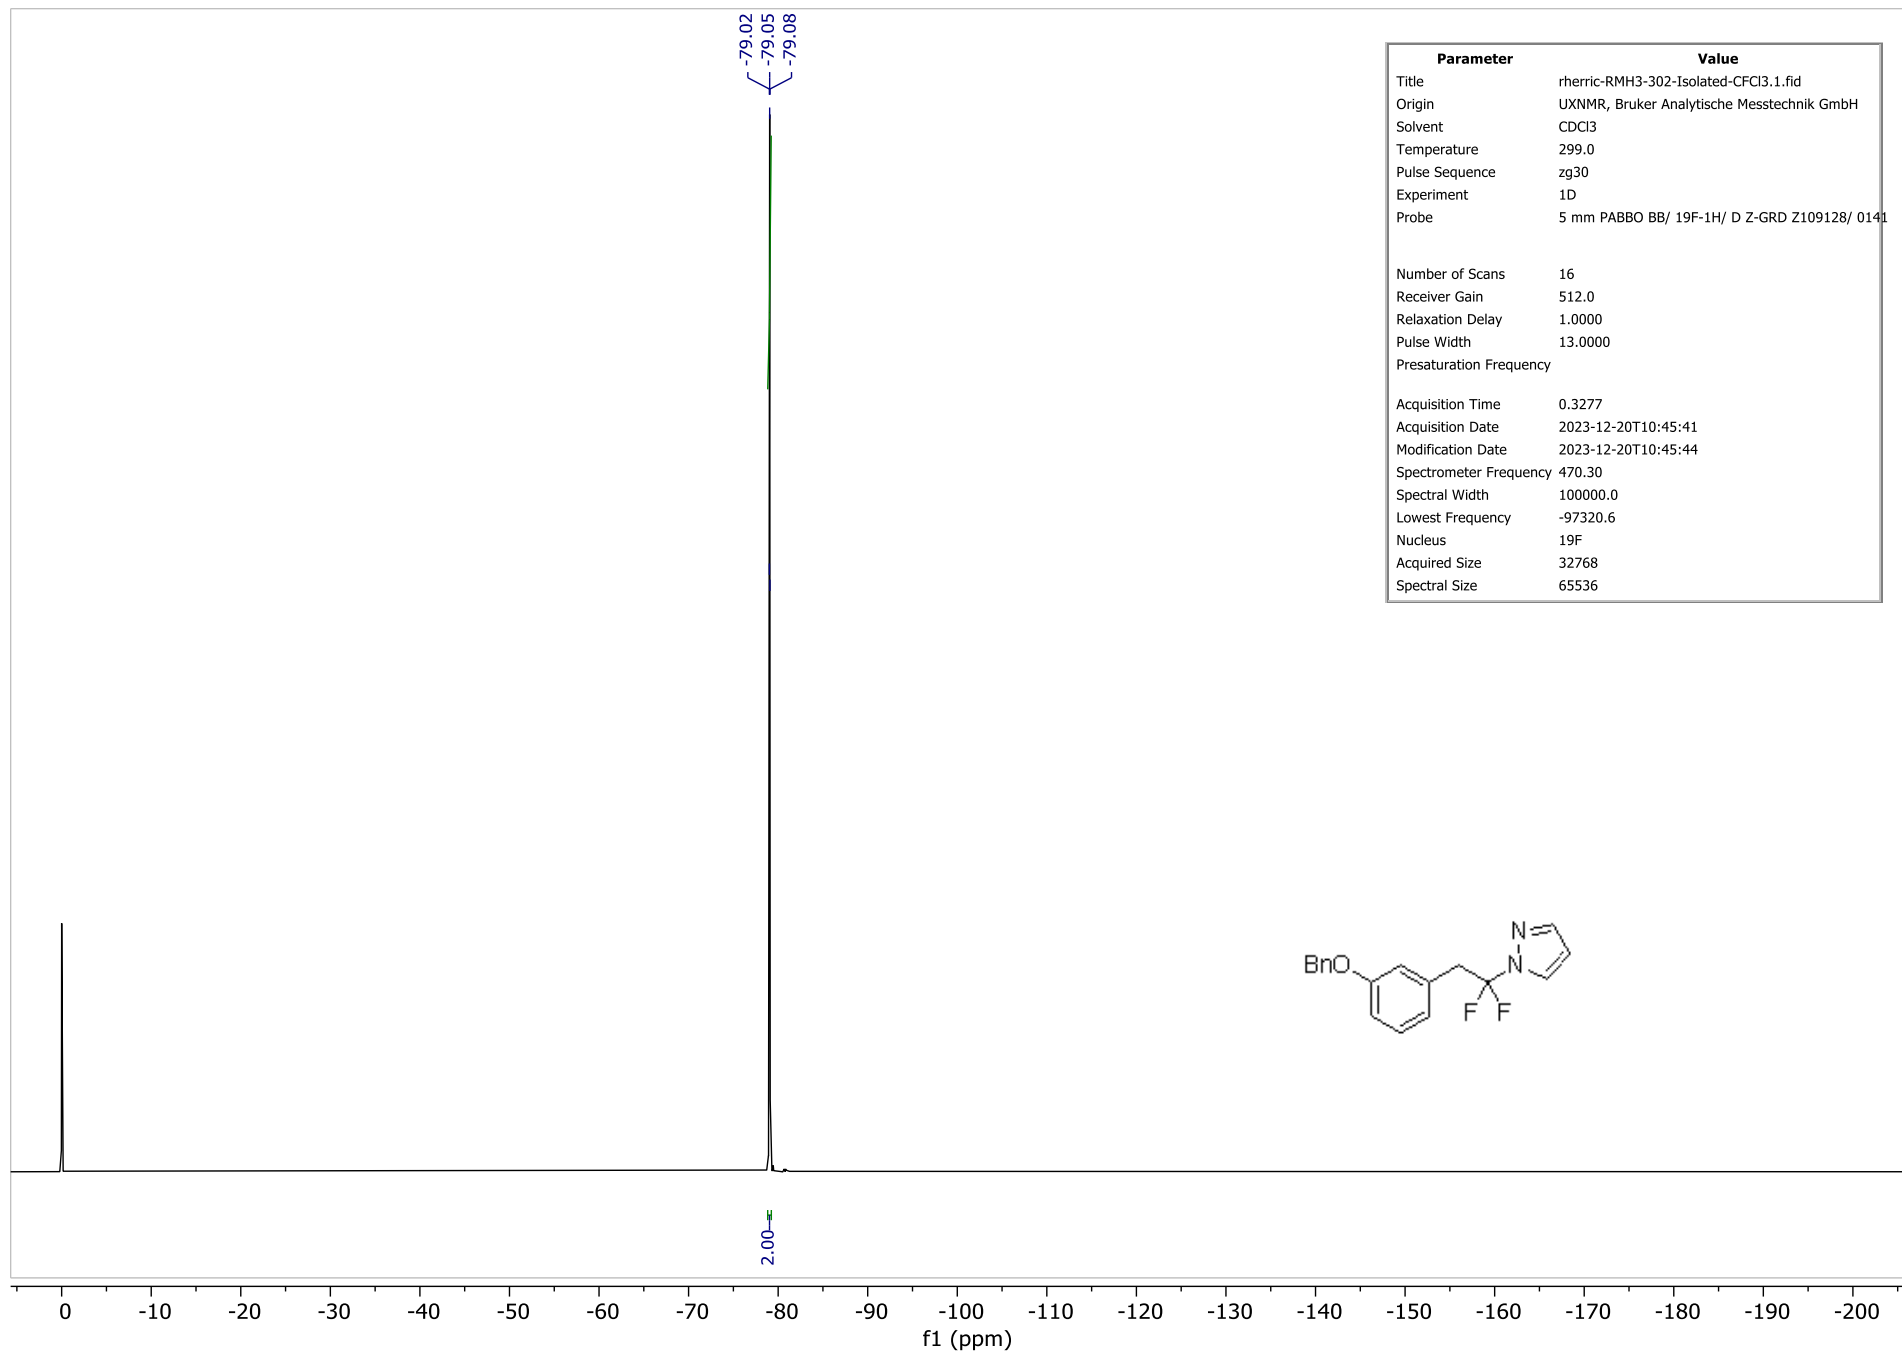

NMR spectra for 1-(2-([1,1'-biphenyl]-4-yl)-1,1-difluoroethyl)-1*H*-pyrazole (**11n**)

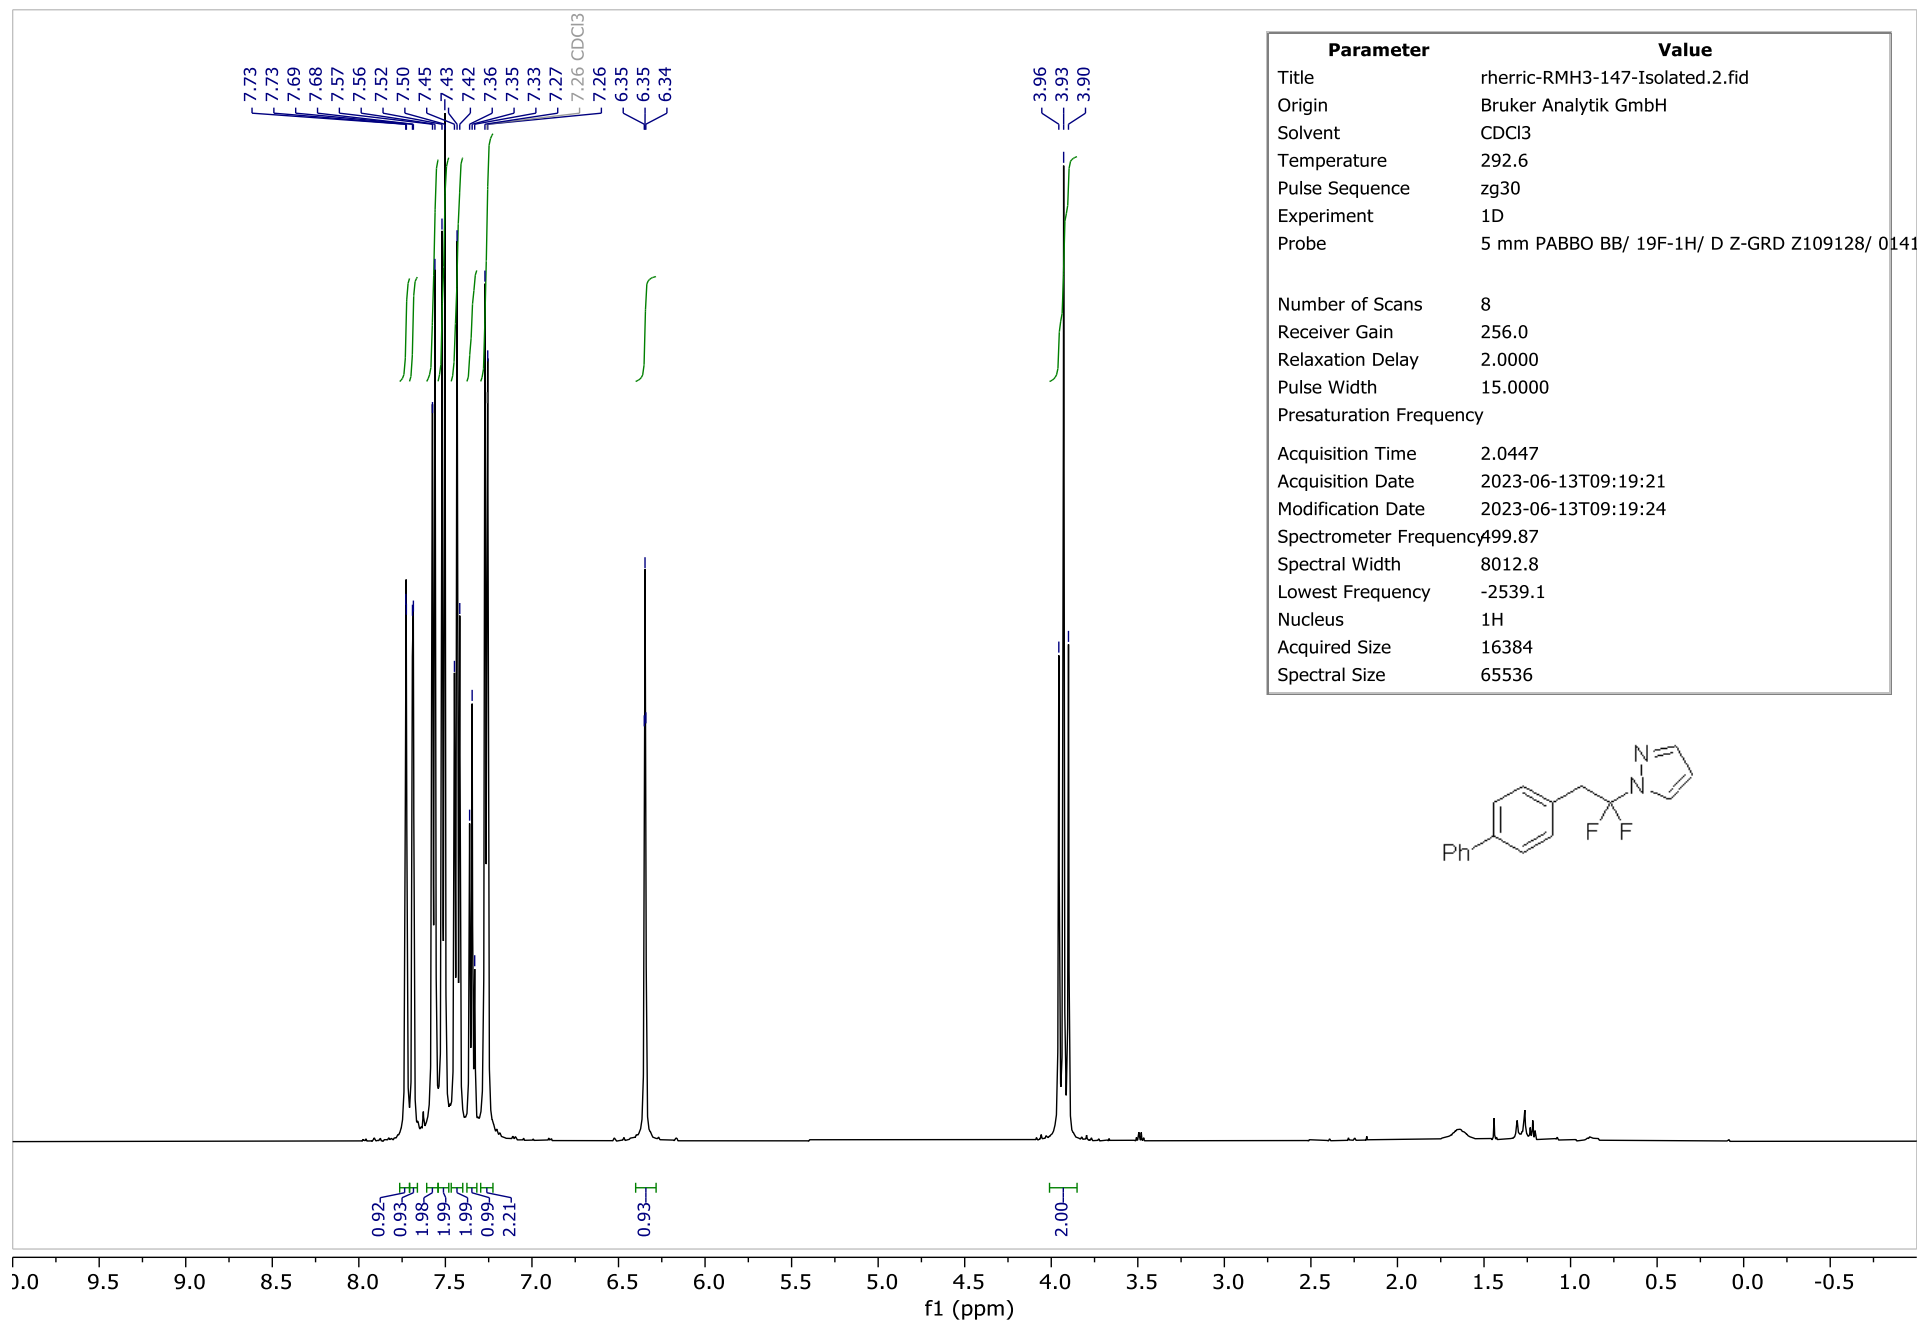



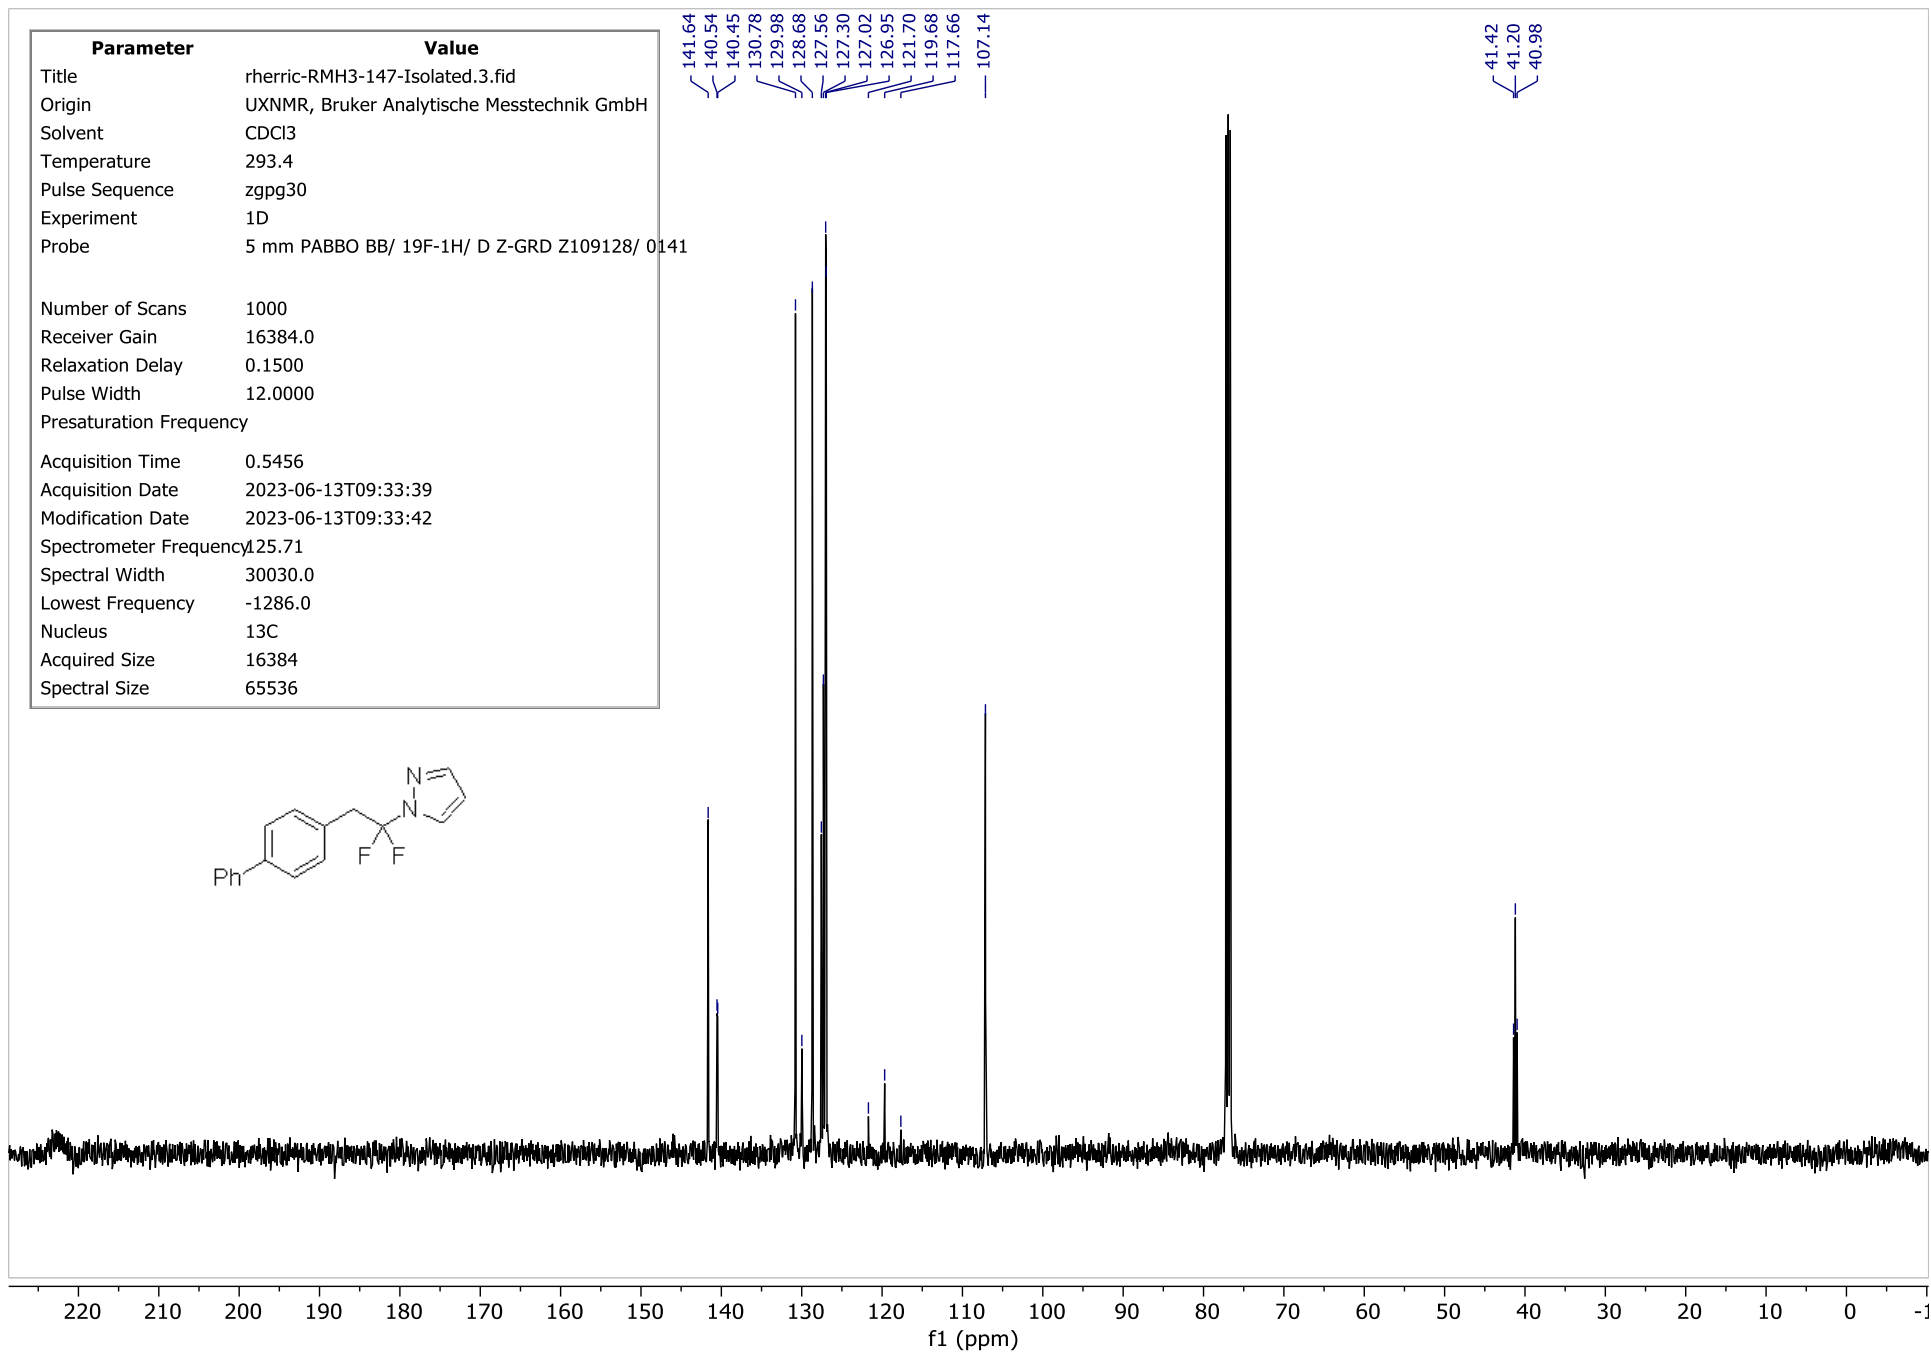

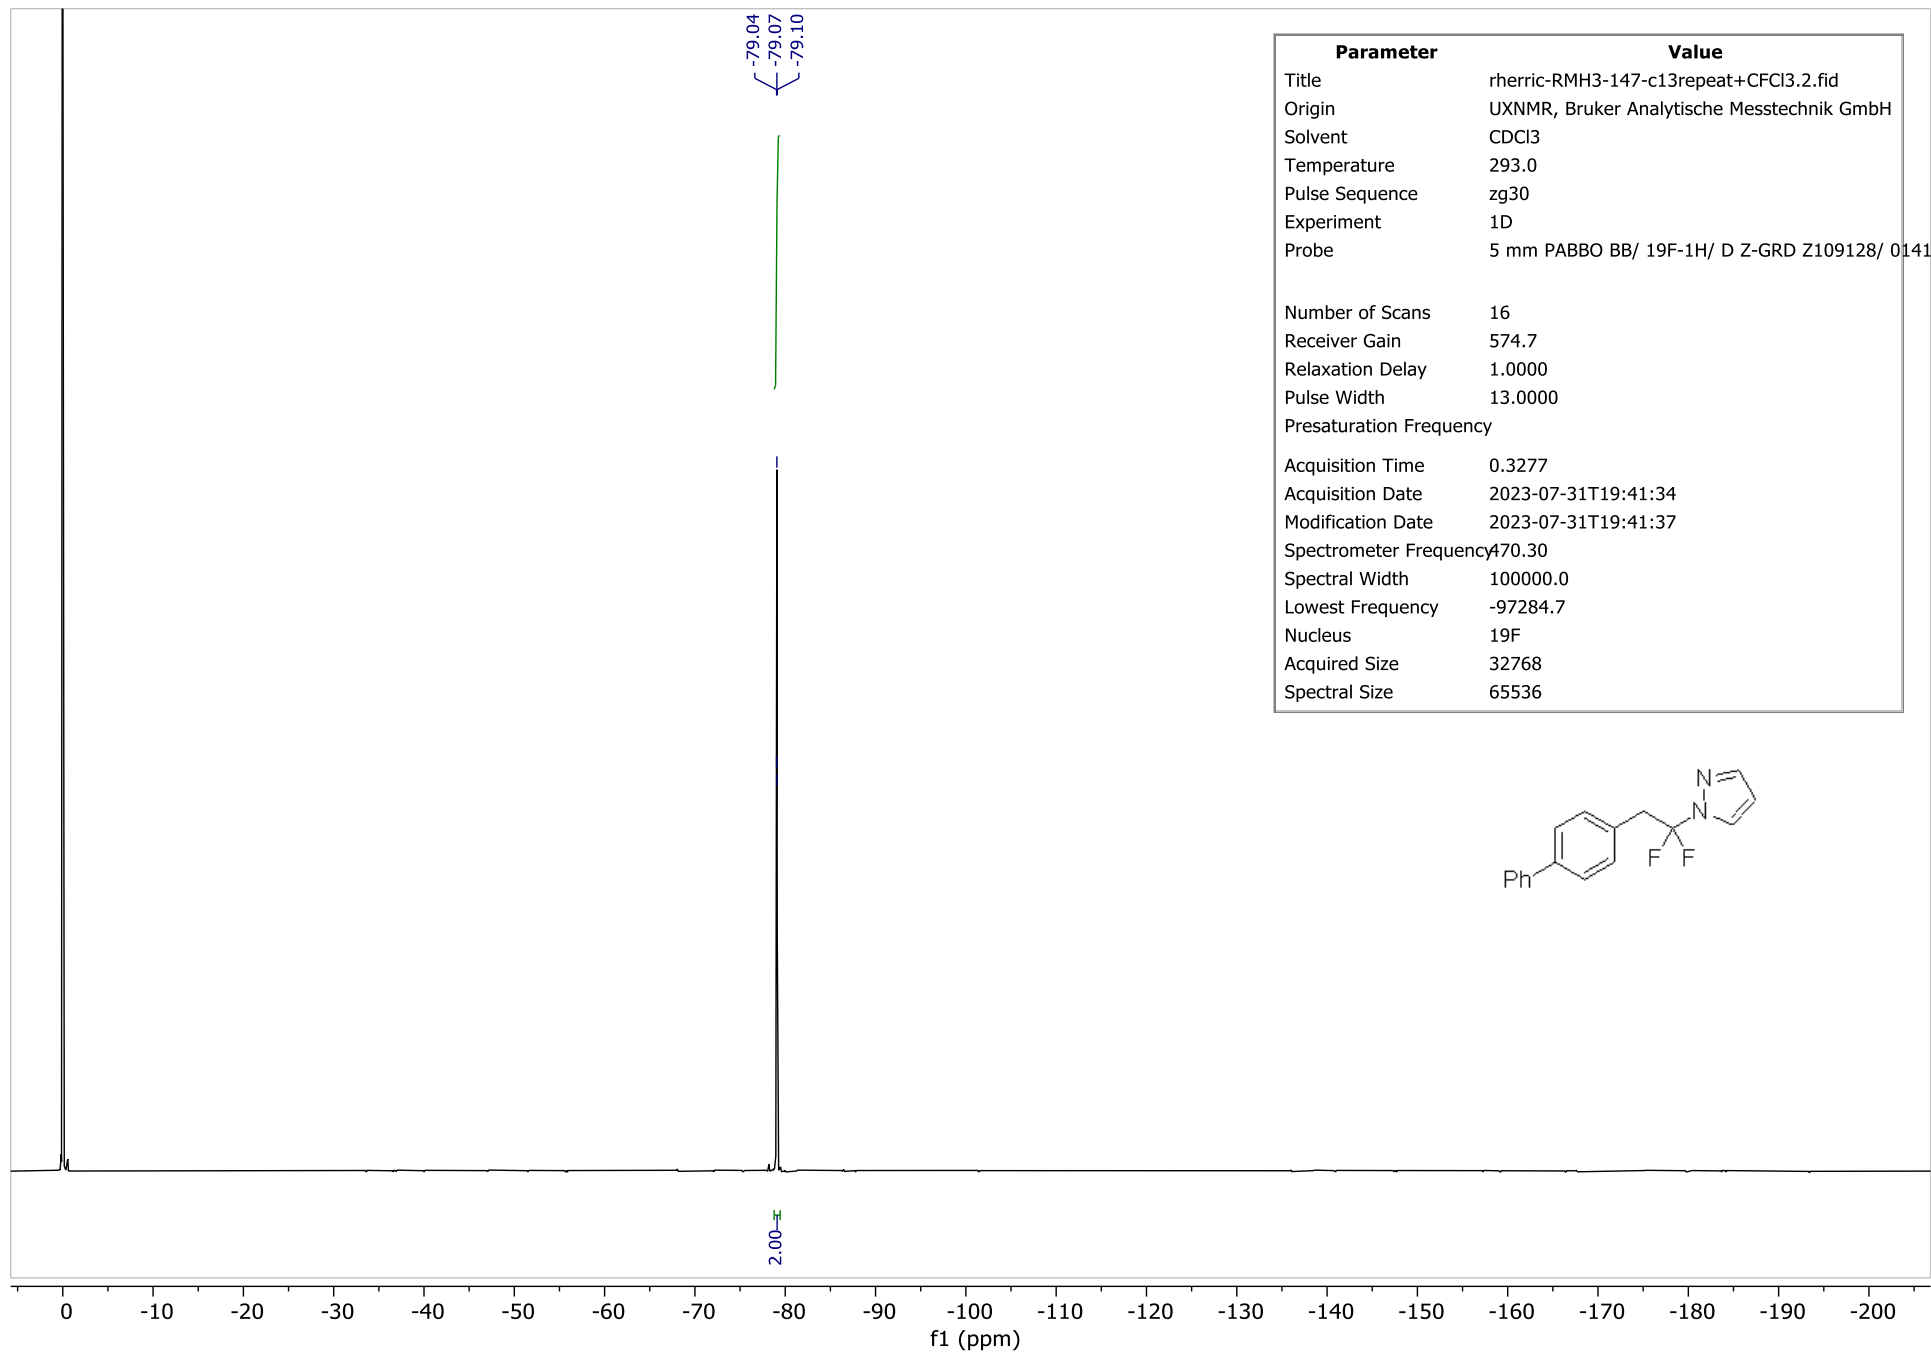

<sup>1</sup>H NMR spectra of **11n** (gram scale reaction)

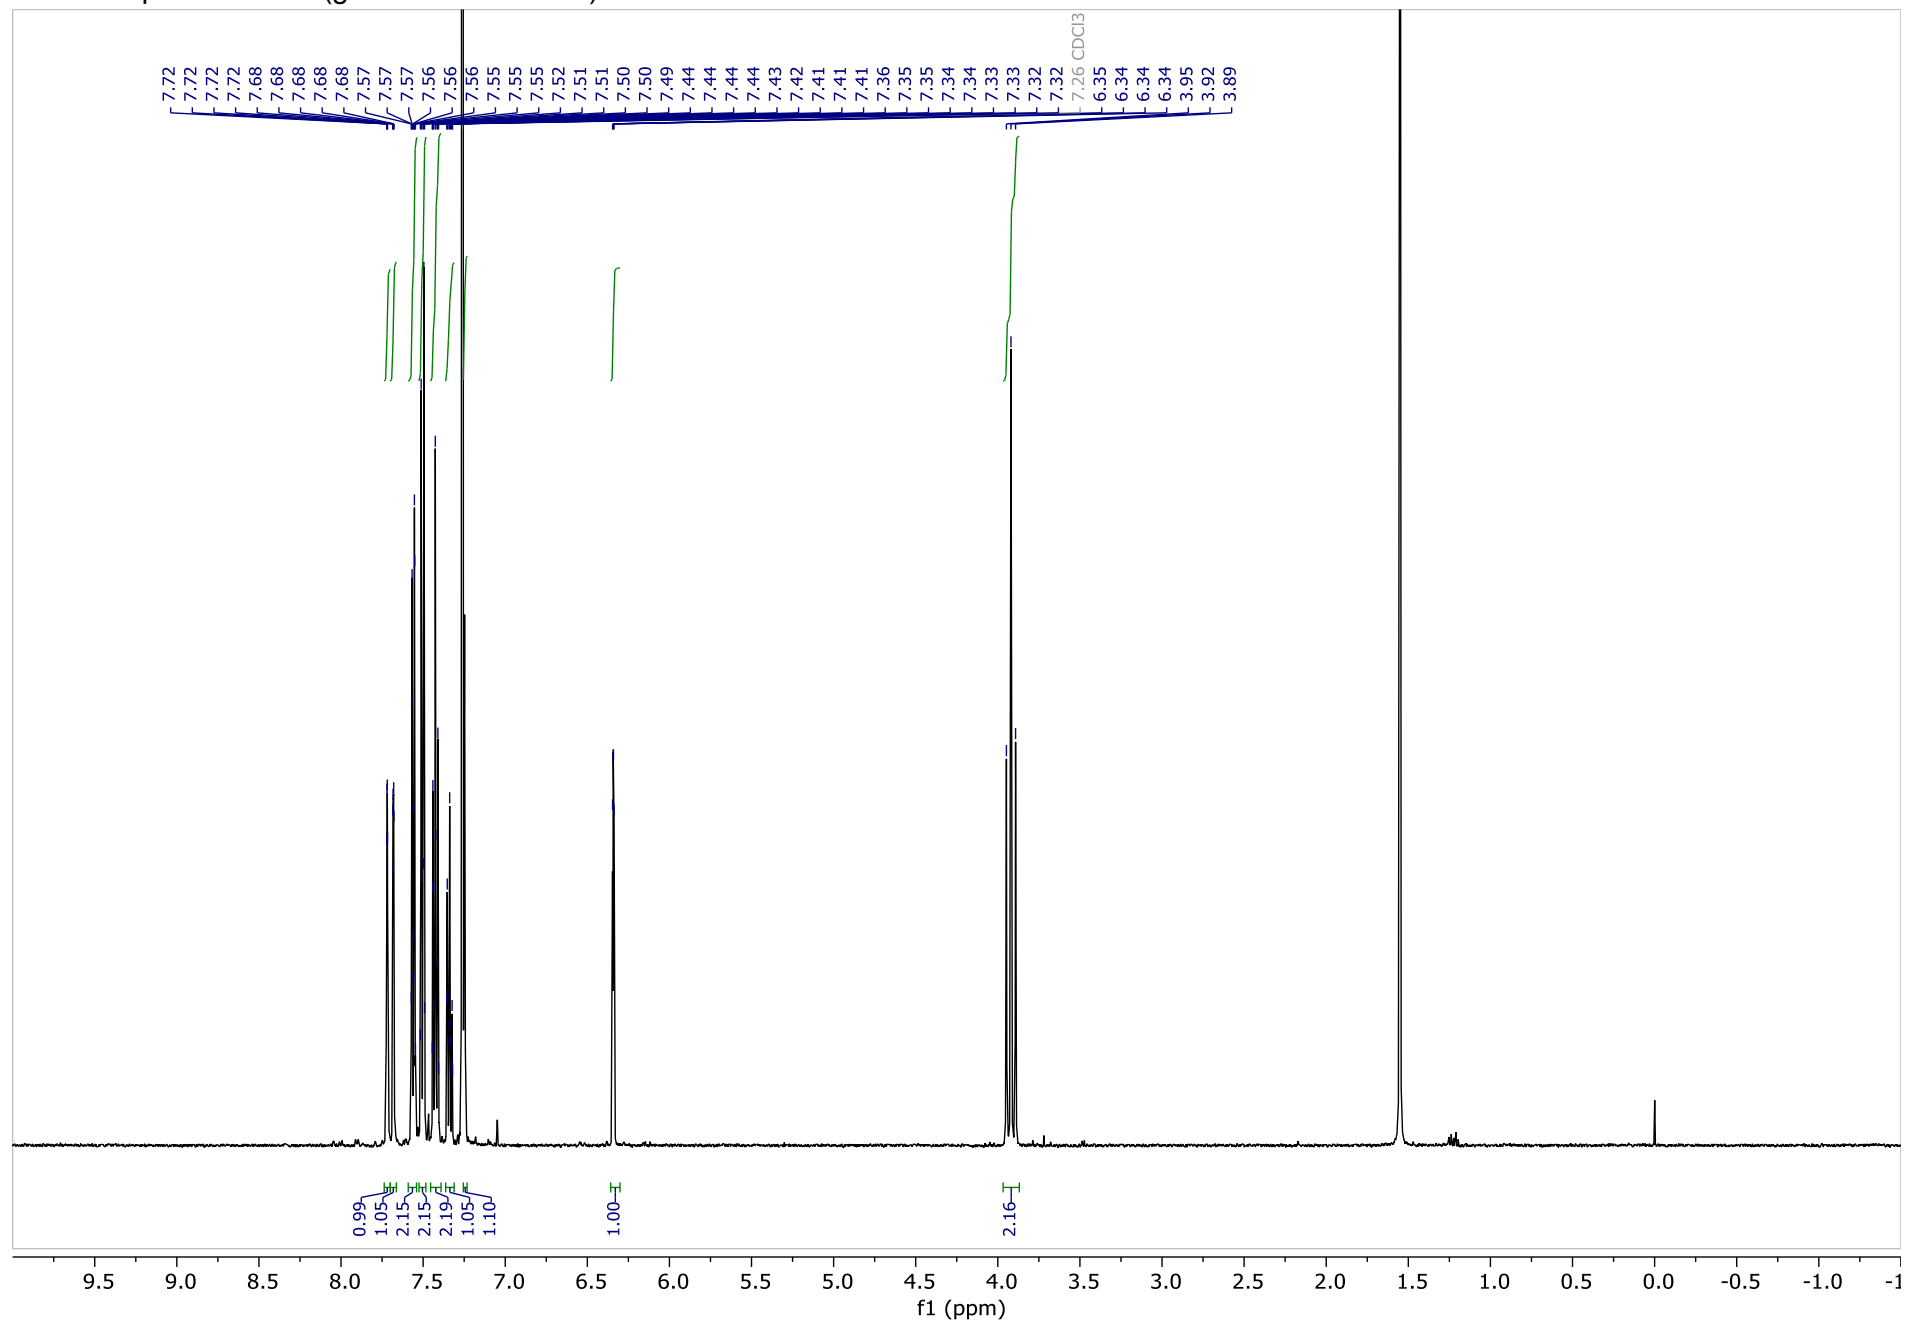

NMR spectra for 1-(2-(2,4-dimethylphenyl)-1,1-difluoroethyl)-1*H*-pyrazole (**11o**)

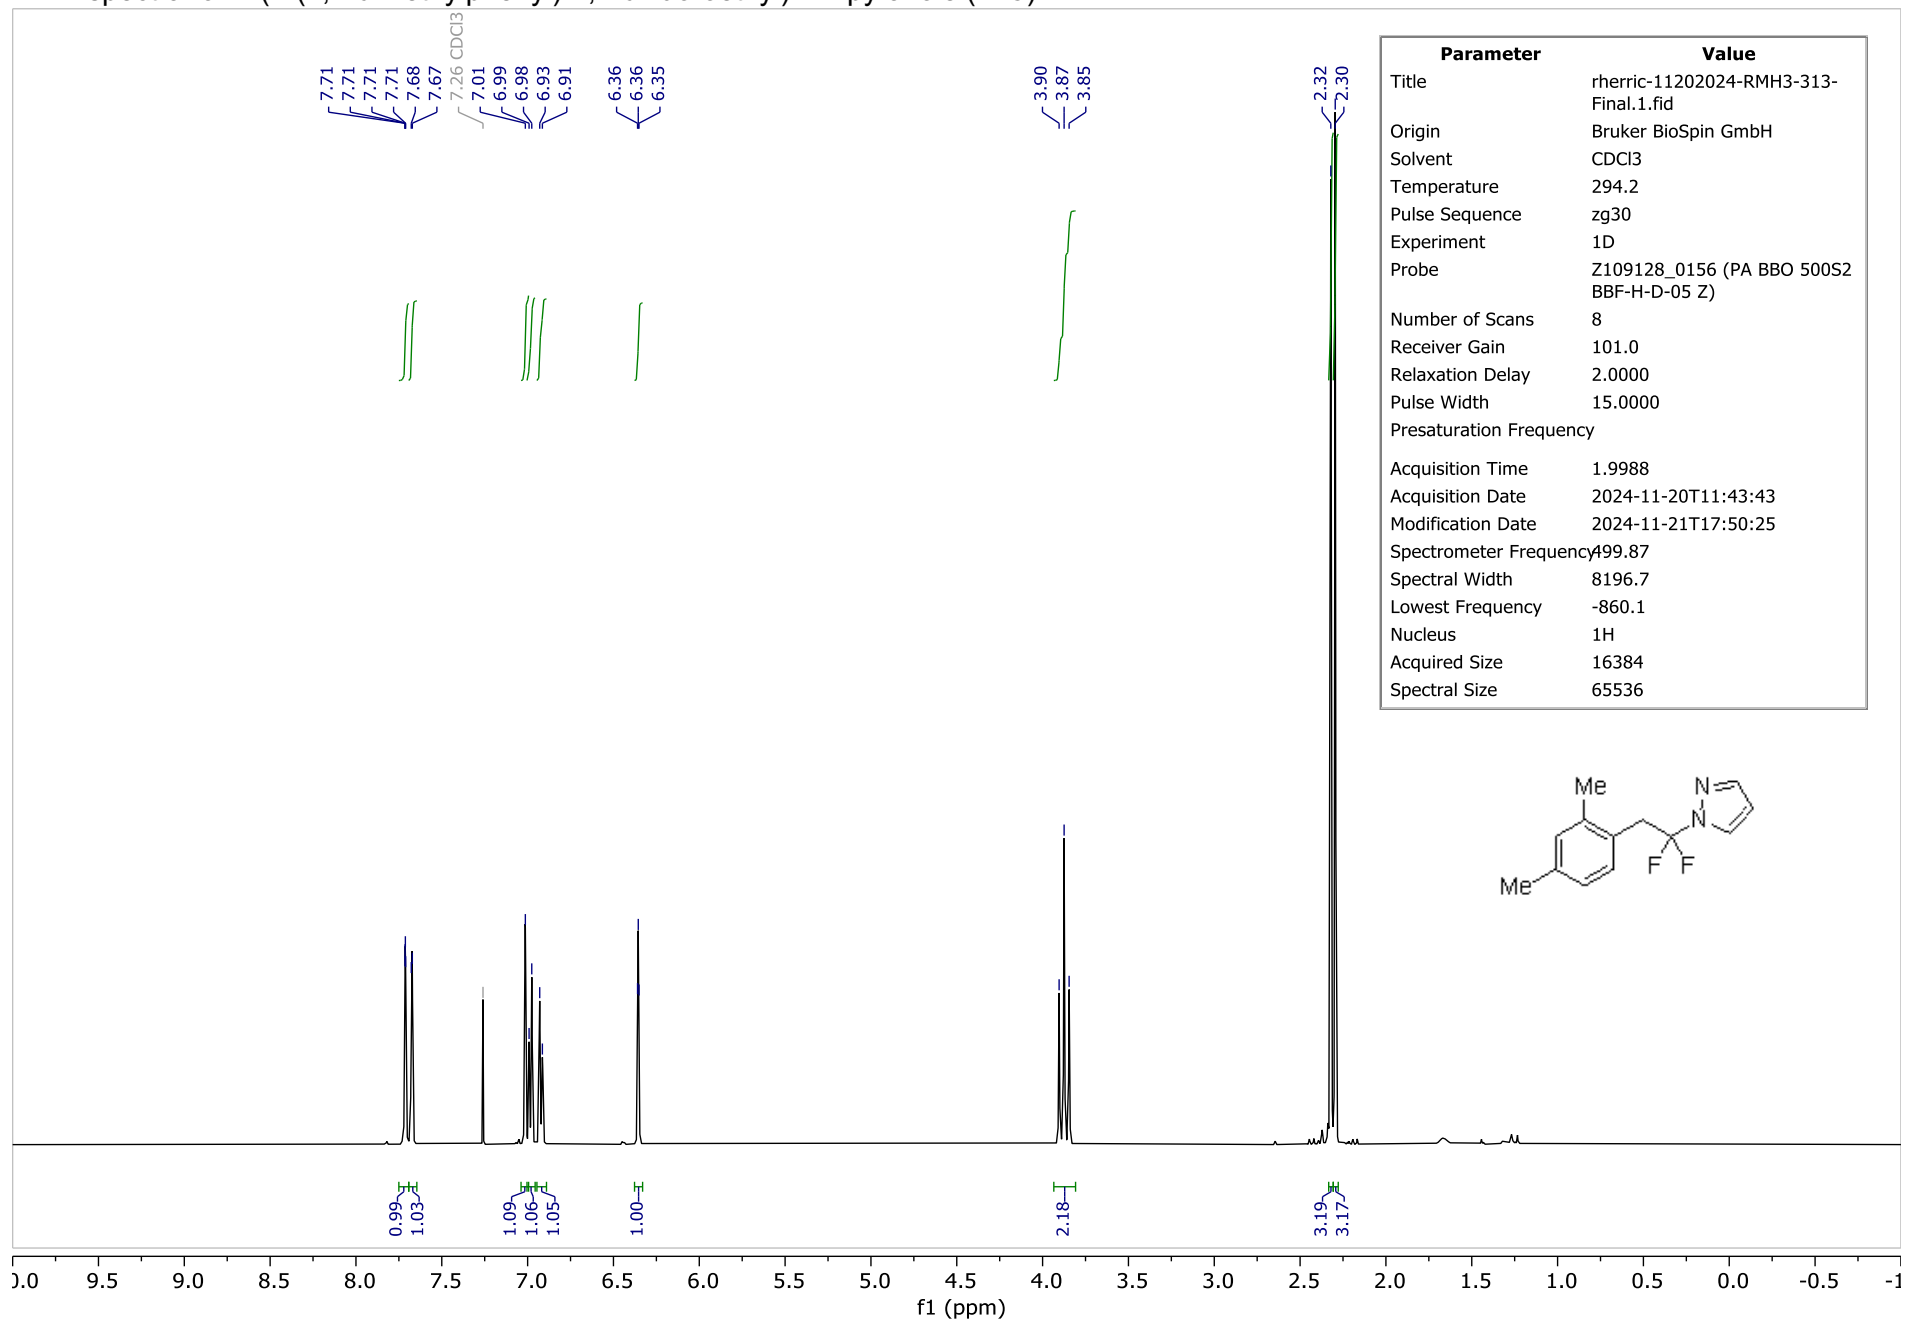

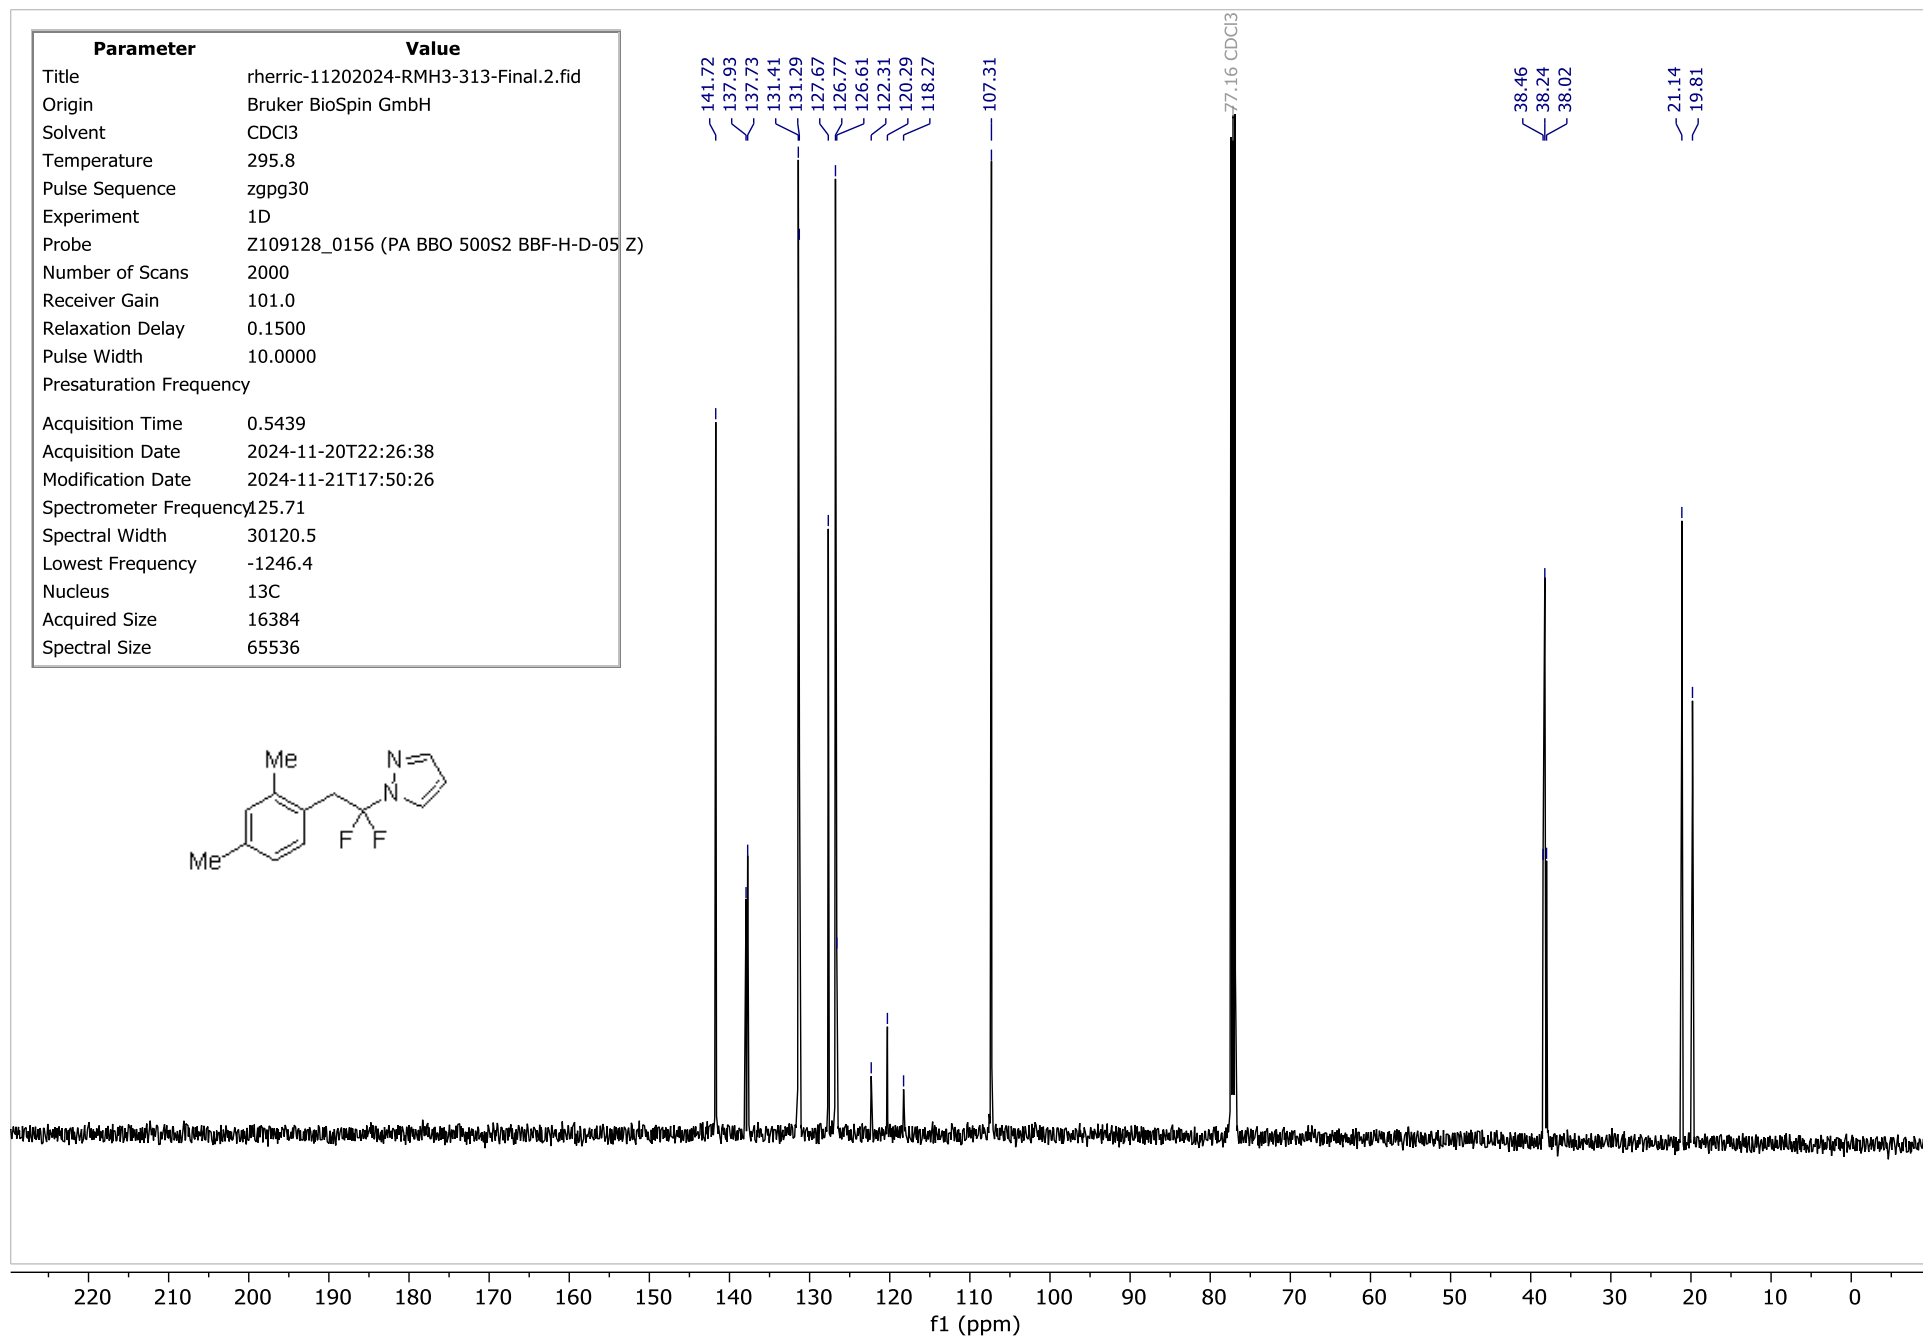

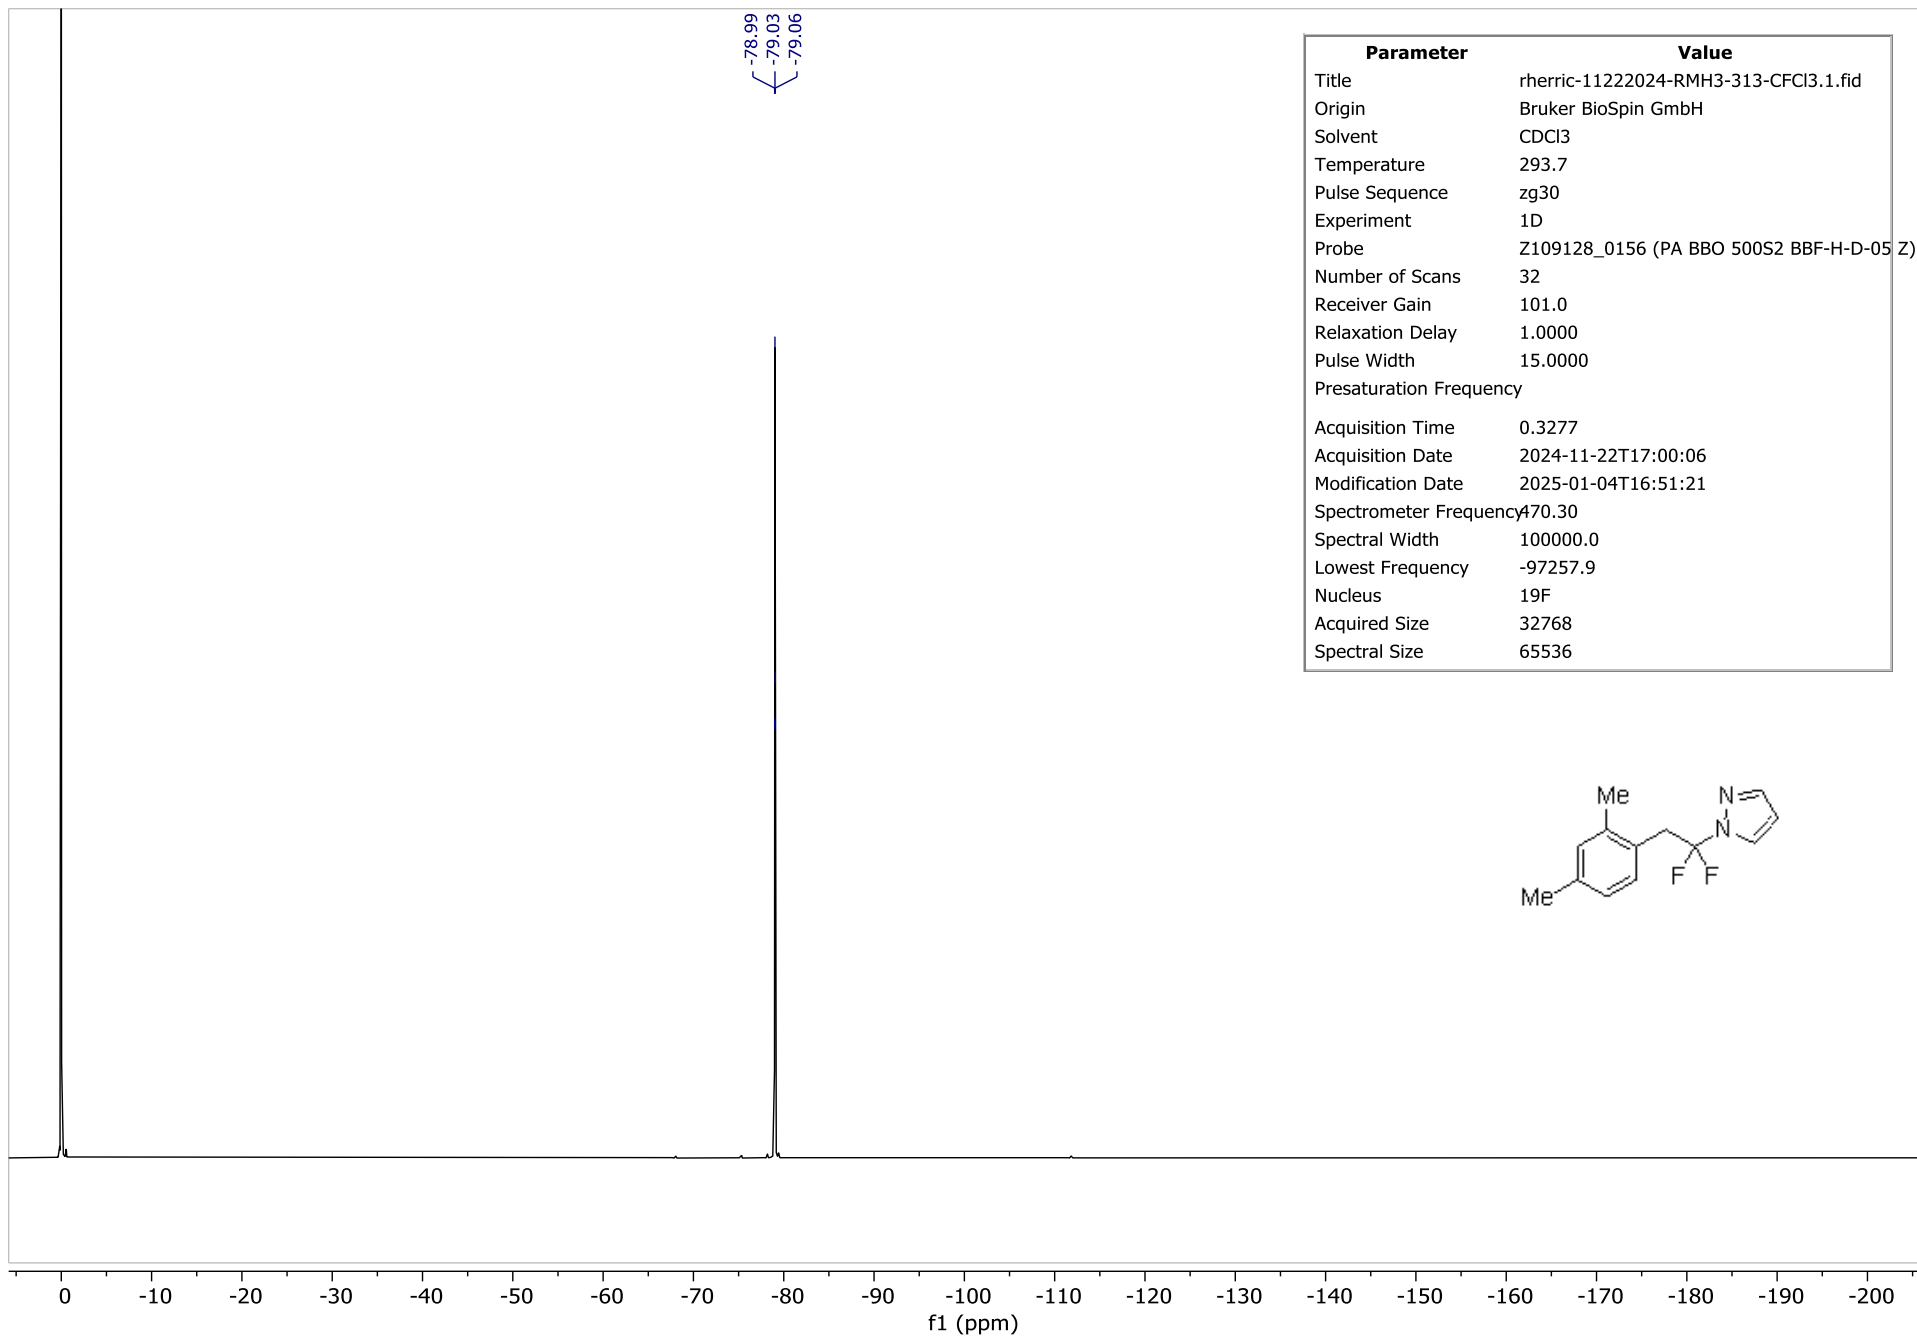

# NMR spectra for 1-(2-(3-chloro-4-methoxyphenyl)-1, 1-difluoroethyl)-1H-pyrazole (**11p**)

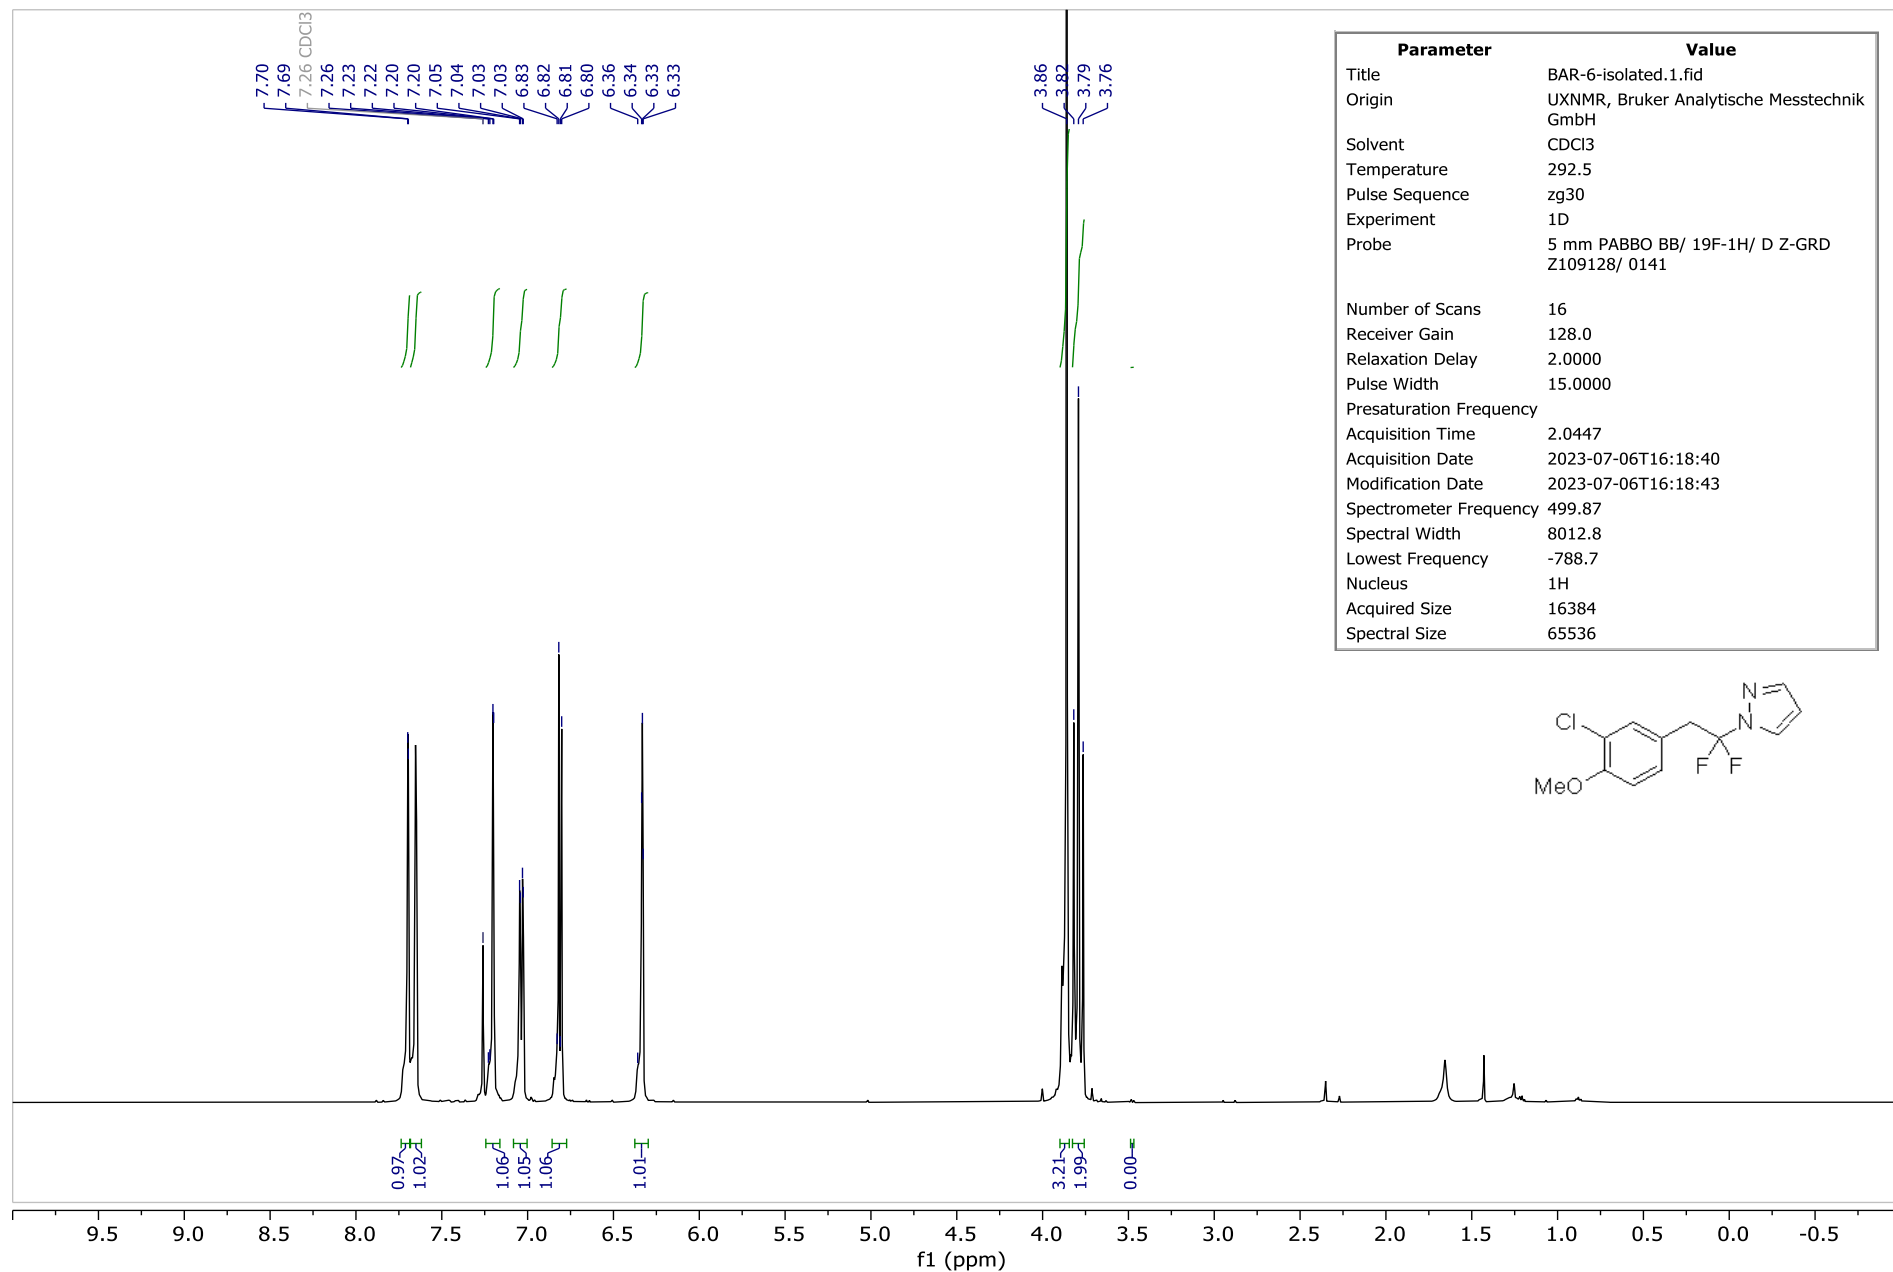

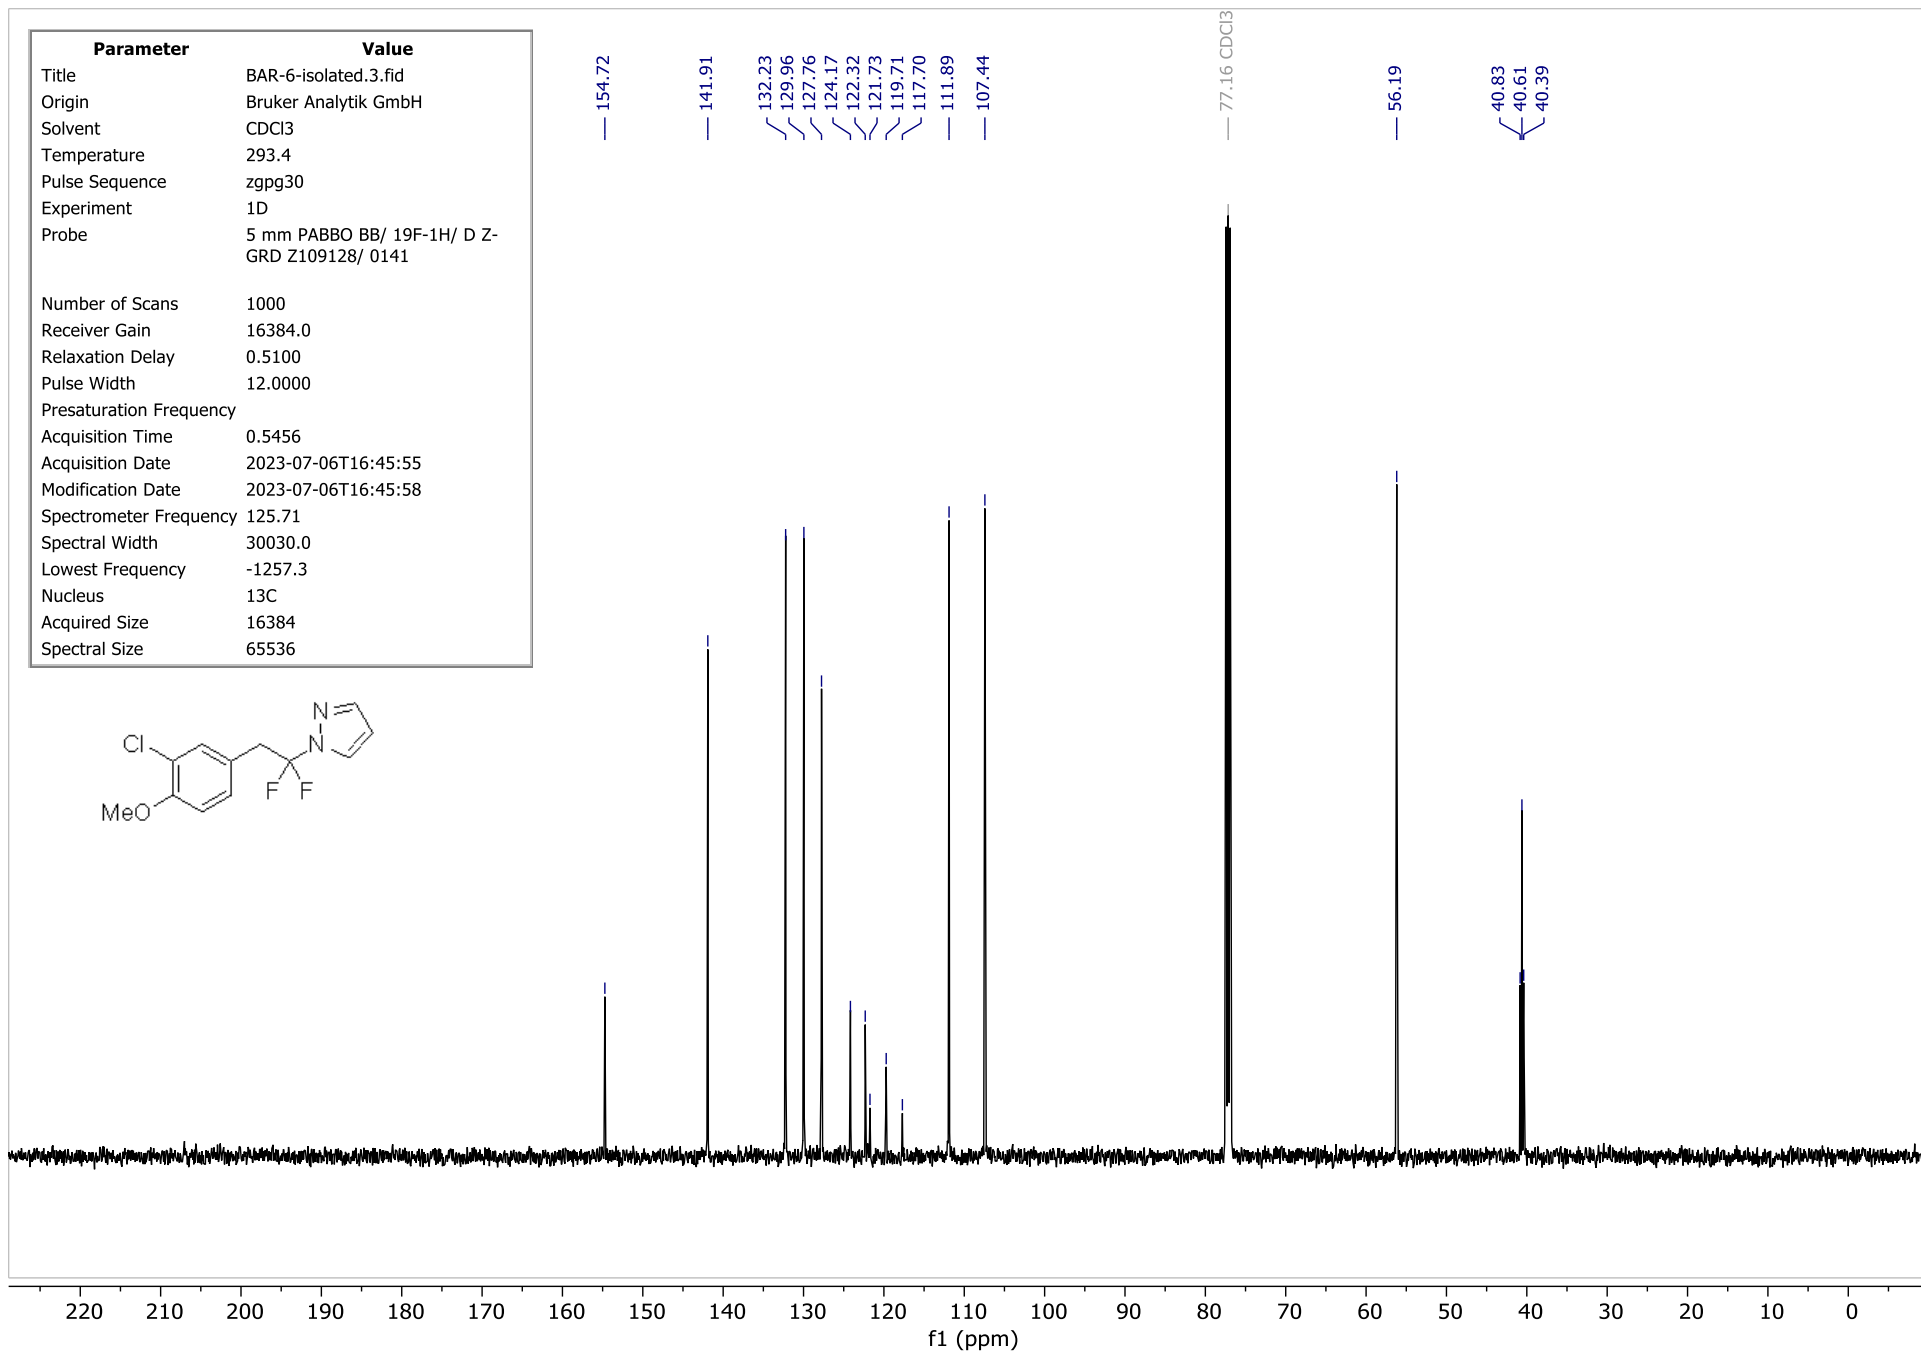



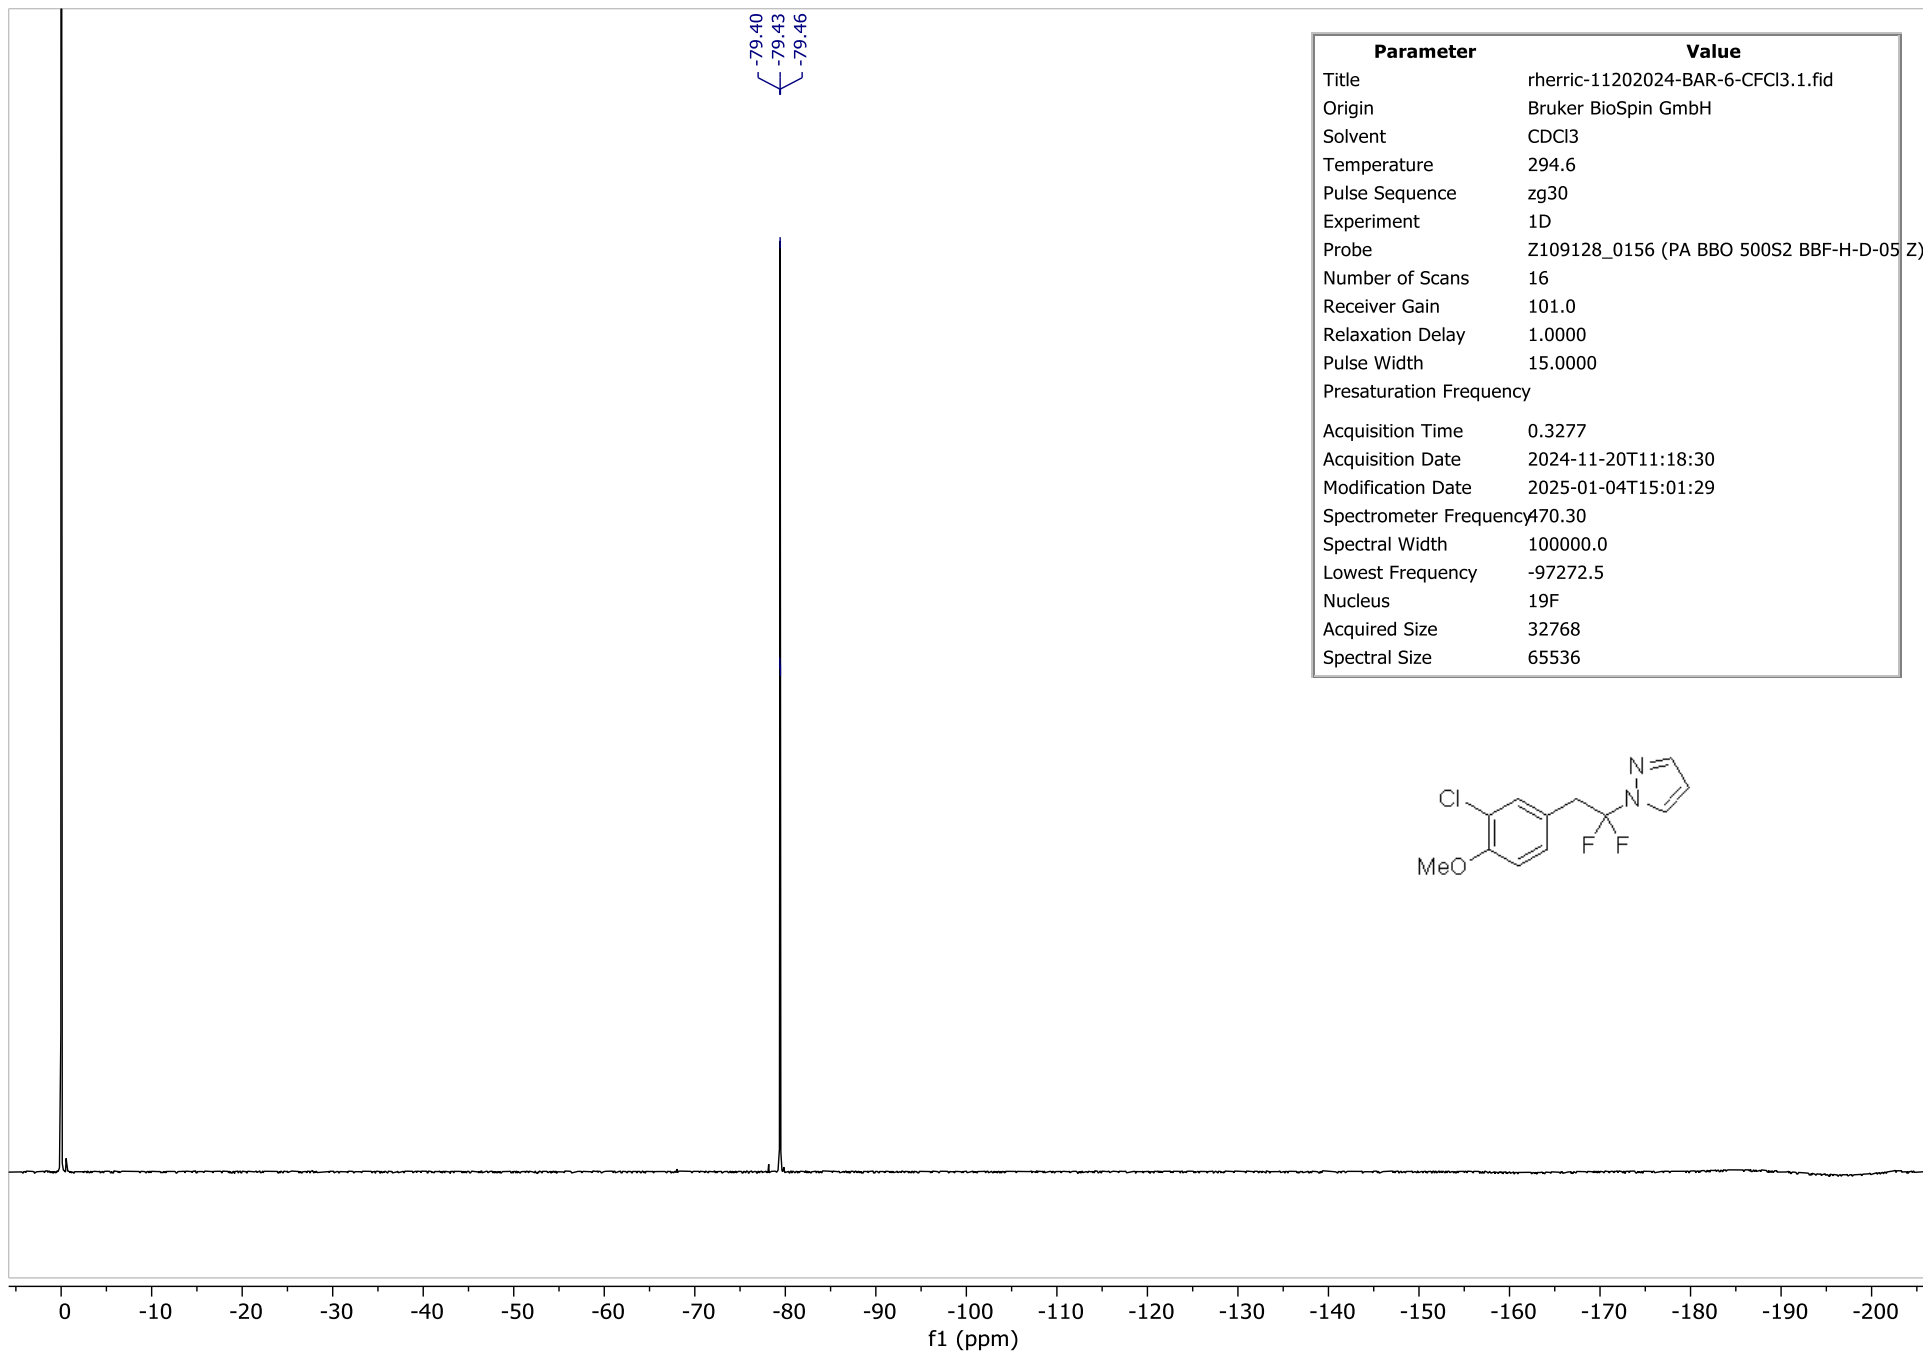

| Parameter               | Value                                    |
|-------------------------|------------------------------------------|
| Title                   | rherric-11202024-BAR-6-CFCl3.1.fid       |
| Origin                  | Bruker BioSpin GmbH                      |
| Solvent                 | CDCl3                                    |
| Temperature             | 294.6                                    |
| Pulse Sequence          | zg30                                     |
| Experiment              | 1D                                       |
| Probe                   | Z109128_0156 (PA BBO 500S2 BBF-H-D-05 Z) |
| Number of Scans         | 16                                       |
| Receiver Gain           | 101.0                                    |
| Relaxation Delay        | 1.0000                                   |
| Pulse Width             | 15.0000                                  |
| Presaturation Frequency |                                          |
| Acquisition Time        | 0.3277                                   |
| Acquisition Date        | 2024-11-20T11:18:30                      |
| Modification Date       | 2025-01-04T15:01:29                      |
| Spectrometer Frequency  | 470.30                                   |
| Spectral Width          | 100000.0                                 |
| Lowest Frequency        | -97272.5                                 |
| Nucleus                 | 19F                                      |
| Acquired Size           | 32768                                    |
| Spectral Size           | 65536                                    |

# NMR spectra for 1-(2-(4-bromophenyl)-1,1-difluoroethyl)-1H-pyrazole (**11q**)

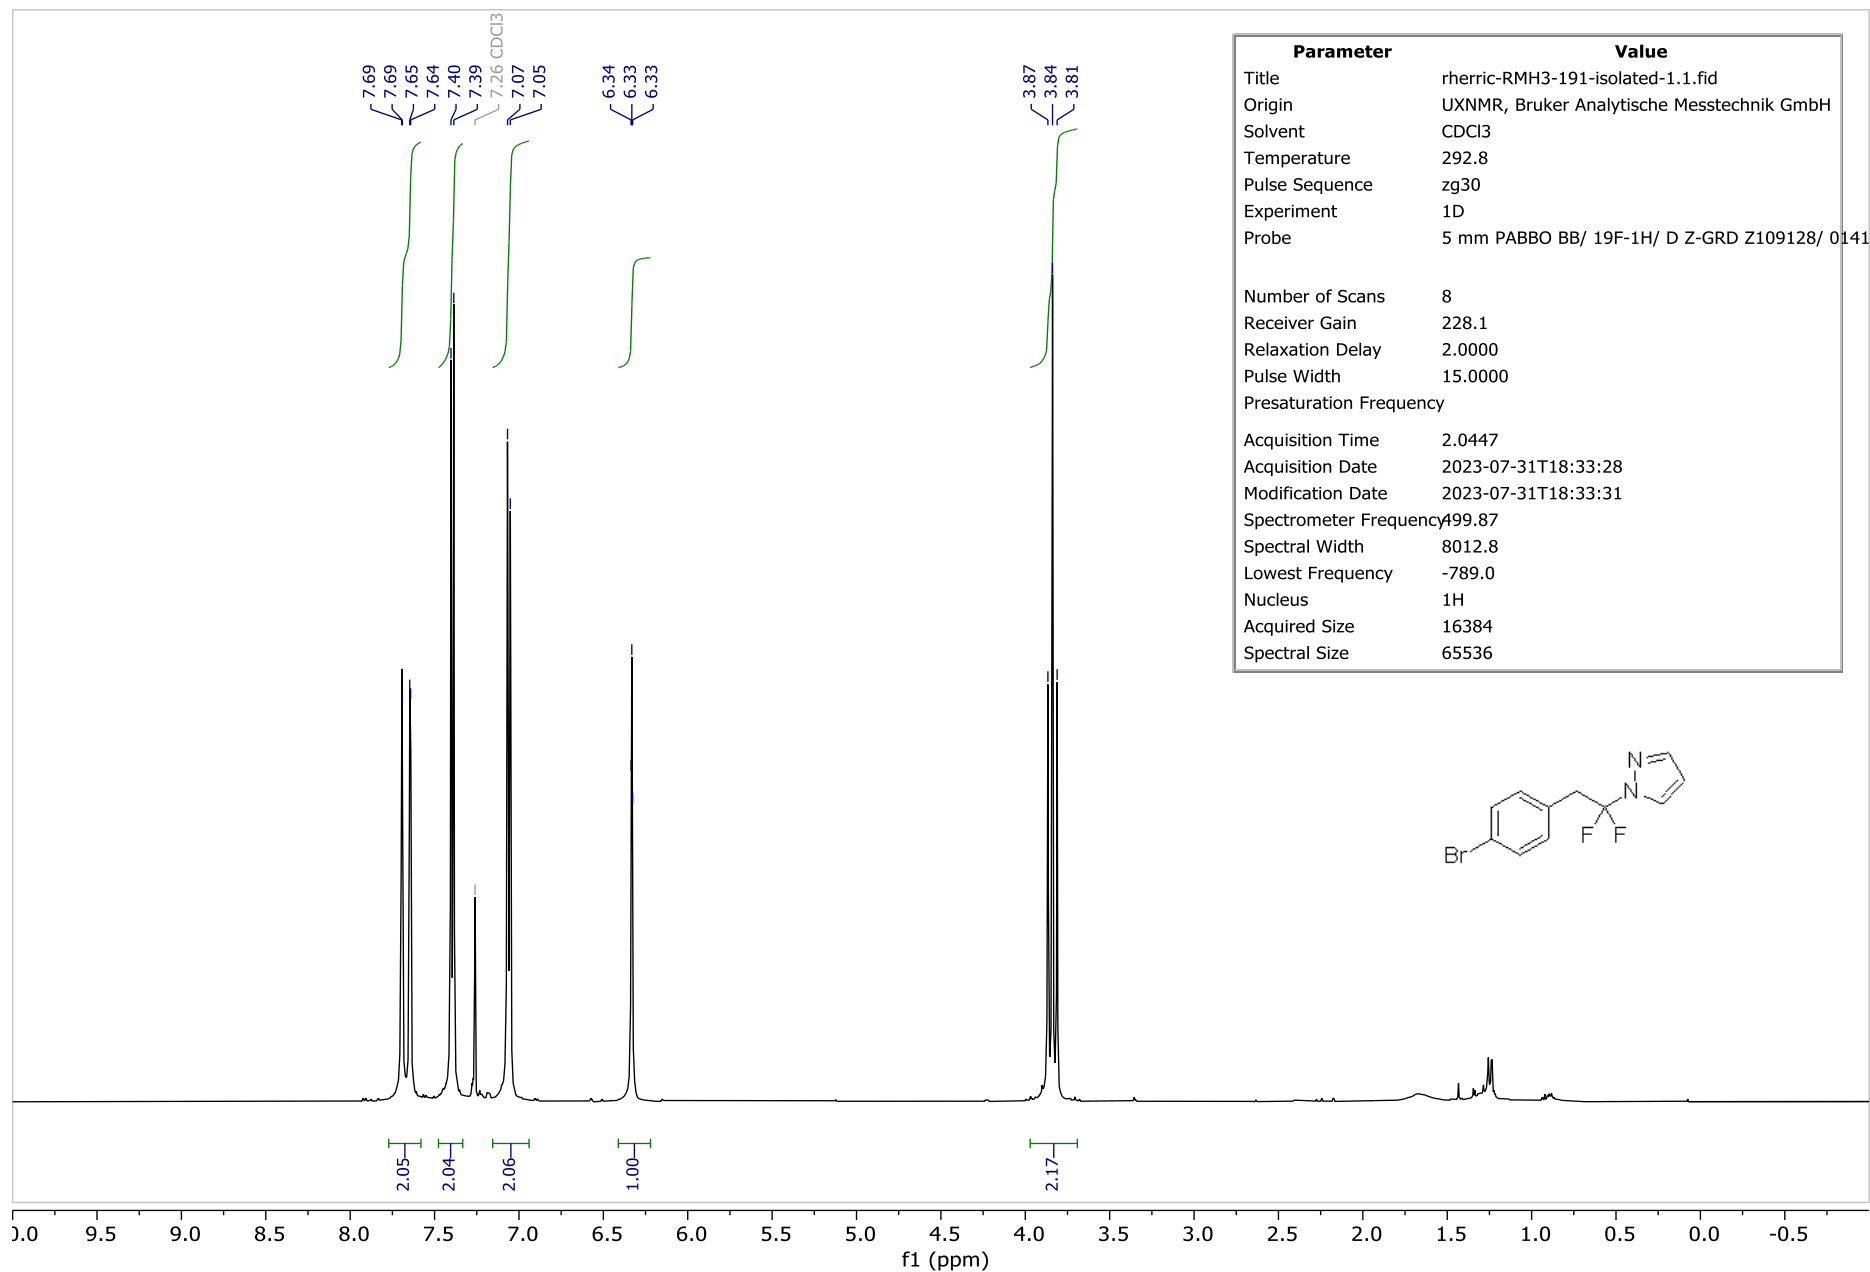

| Parameter      | Value                                        |
|----------------|----------------------------------------------|
| Title          | rherric-RMH3-191-isolated-1.2.fid            |
| Origin         | UXNMR, Bruker Analytische Messtechnik GmbH   |
| Solvent        | CDCl <sub>3</sub>                            |
| Temperature    | 293.7                                        |
| Pulse Sequence | zgpg30                                       |
| Experiment     | 1D                                           |
| Probe          | 5 mm PABBO BB/ 19F-1H/ D Z-GRD Z109128/ 0141 |

|                         |                     |
|-------------------------|---------------------|
| Number of Scans         | 1000                |
| Receiver Gain           | 16384.0             |
| Relaxation Delay        | 0.1500              |
| Pulse Width             | 12.0000             |
| Presaturation Frequency |                     |
| Acquisition Time        | 0.5456              |
| Acquisition Date        | 2023-07-31T19:20:17 |
| Modification Date       | 2023-07-31T19:20:20 |
| Spectrometer Frequency  | 125.71              |
| Spectral Width          | 30030.0             |
| Lowest Frequency        | -1256.5             |
| Nucleus                 | <sup>13</sup> C     |
| Acquired Size           | 16384               |
| Spectral Size           | 65536               |

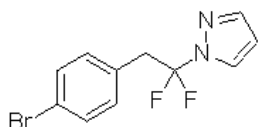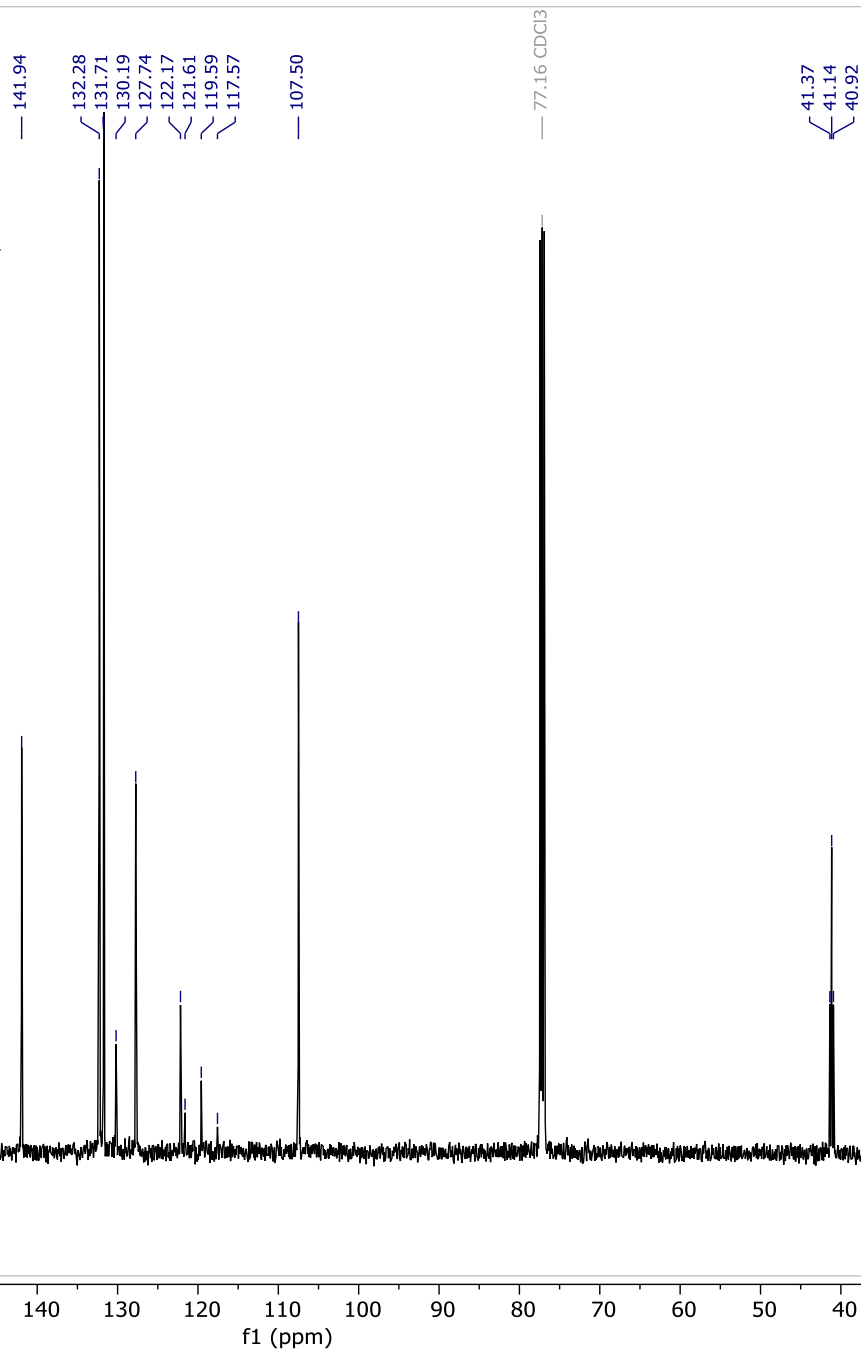

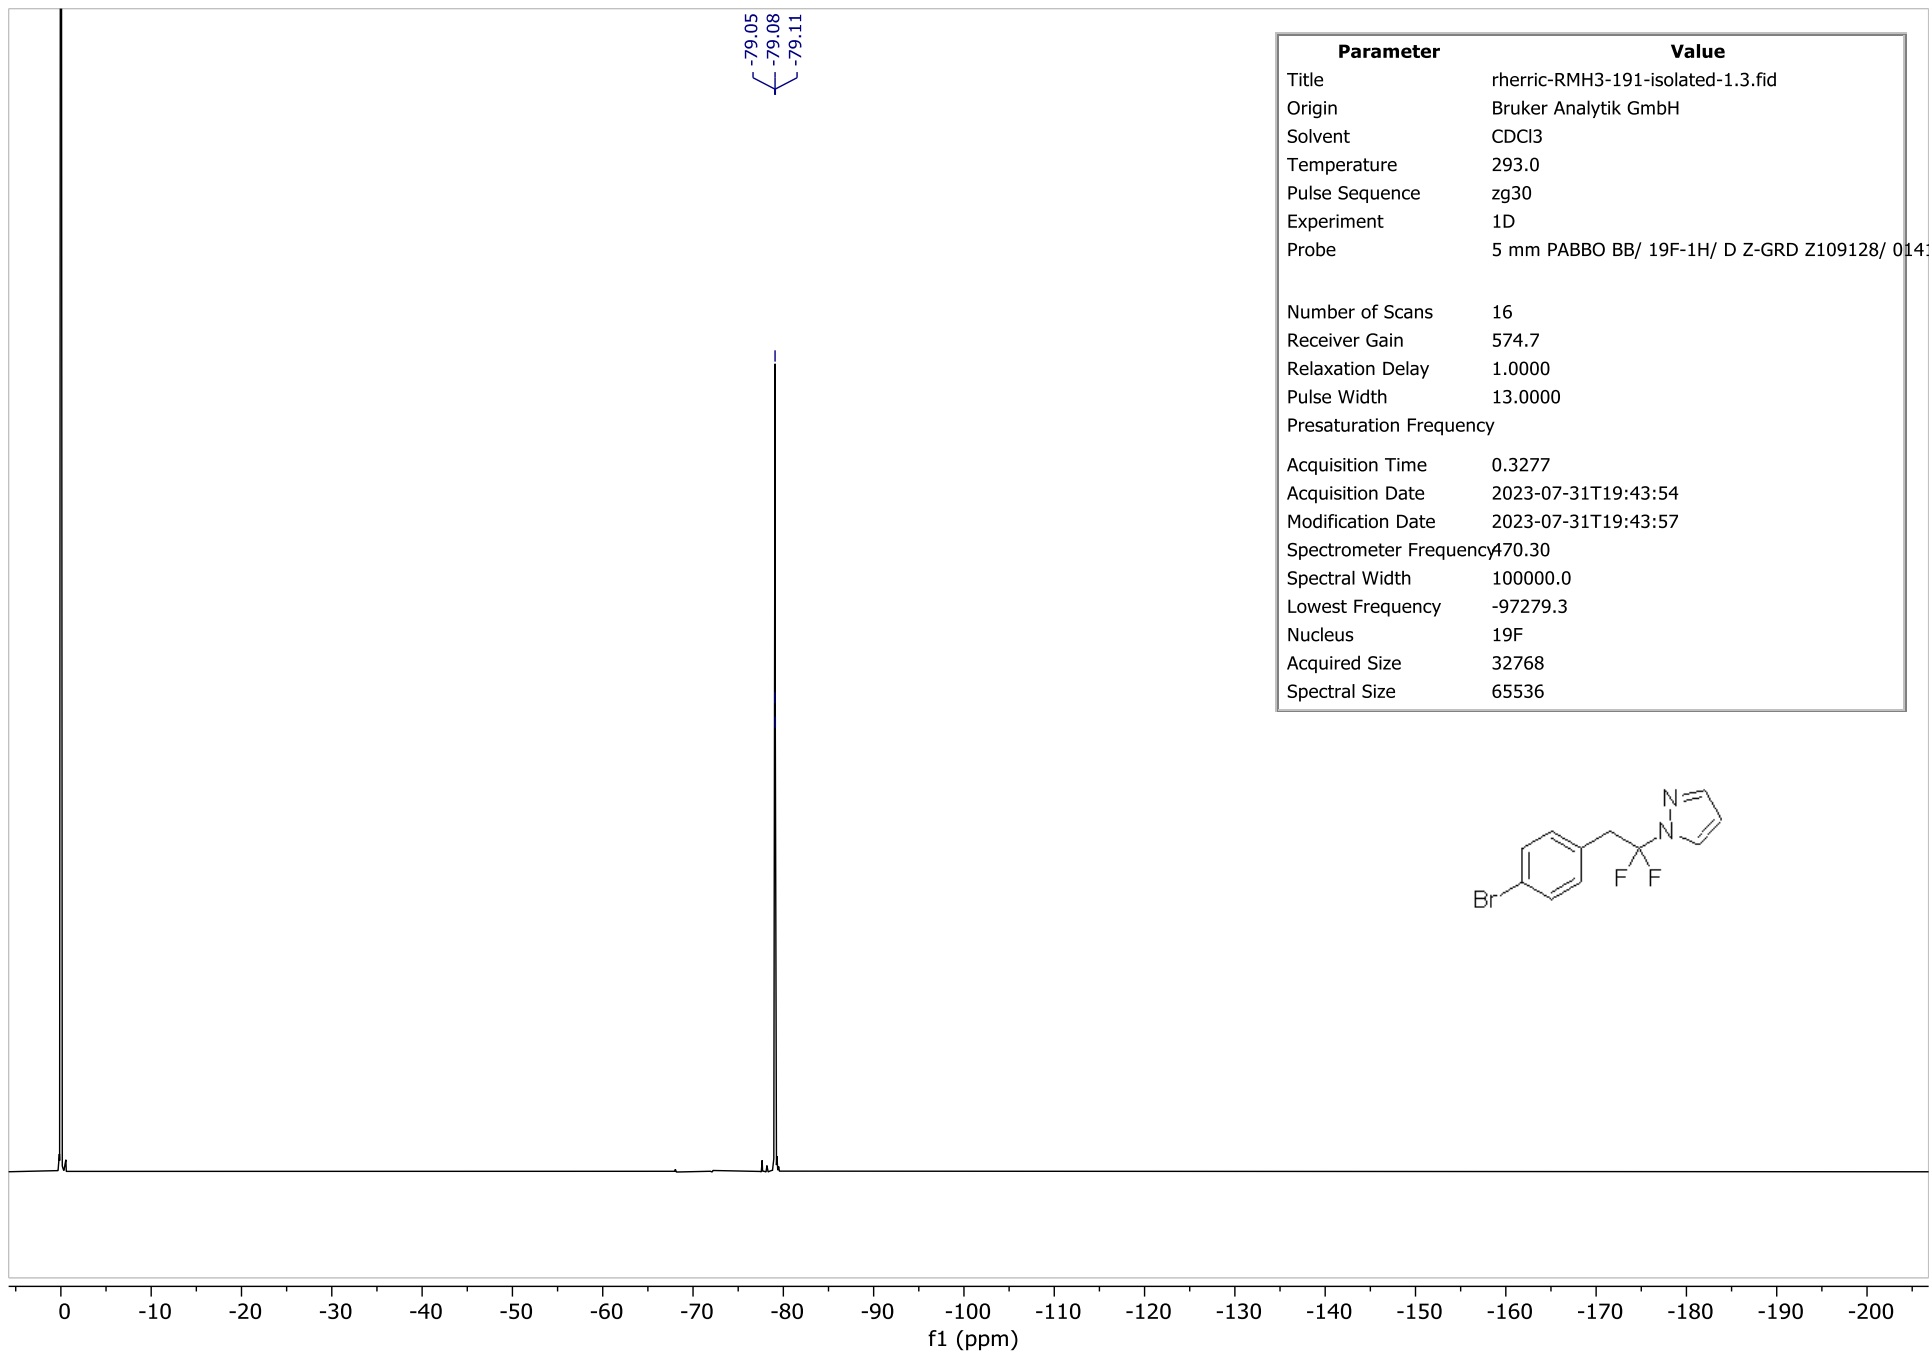

| Parameter               | Value                                       |
|-------------------------|---------------------------------------------|
| Title                   | rherric-RMH3-191-isolated-1.3.fid           |
| Origin                  | Bruker Analytik GmbH                        |
| Solvent                 | CDCl3                                       |
| Temperature             | 293.0                                       |
| Pulse Sequence          | zg30                                        |
| Experiment              | 1D                                          |
| Probe                   | 5 mm PABBO BB/ 19F-1H/ D Z-GRD Z109128/ 014 |
| Number of Scans         | 16                                          |
| Receiver Gain           | 574.7                                       |
| Relaxation Delay        | 1.0000                                      |
| Pulse Width             | 13.0000                                     |
| Presaturation Frequency |                                             |
| Acquisition Time        | 0.3277                                      |
| Acquisition Date        | 2023-07-31T19:43:54                         |
| Modification Date       | 2023-07-31T19:43:57                         |
| Spectrometer Frequency  | 470.30                                      |
| Spectral Width          | 100000.0                                    |
| Lowest Frequency        | -97279.3                                    |
| Nucleus                 | 19F                                         |
| Acquired Size           | 32768                                       |
| Spectral Size           | 65536                                       |

NMR spectra for 4-(2,2-difluoro-2-(1*H*-pyrazol-1-yl)ethyl)phenyl 4-methylbenzenesulfonate (**11r**)

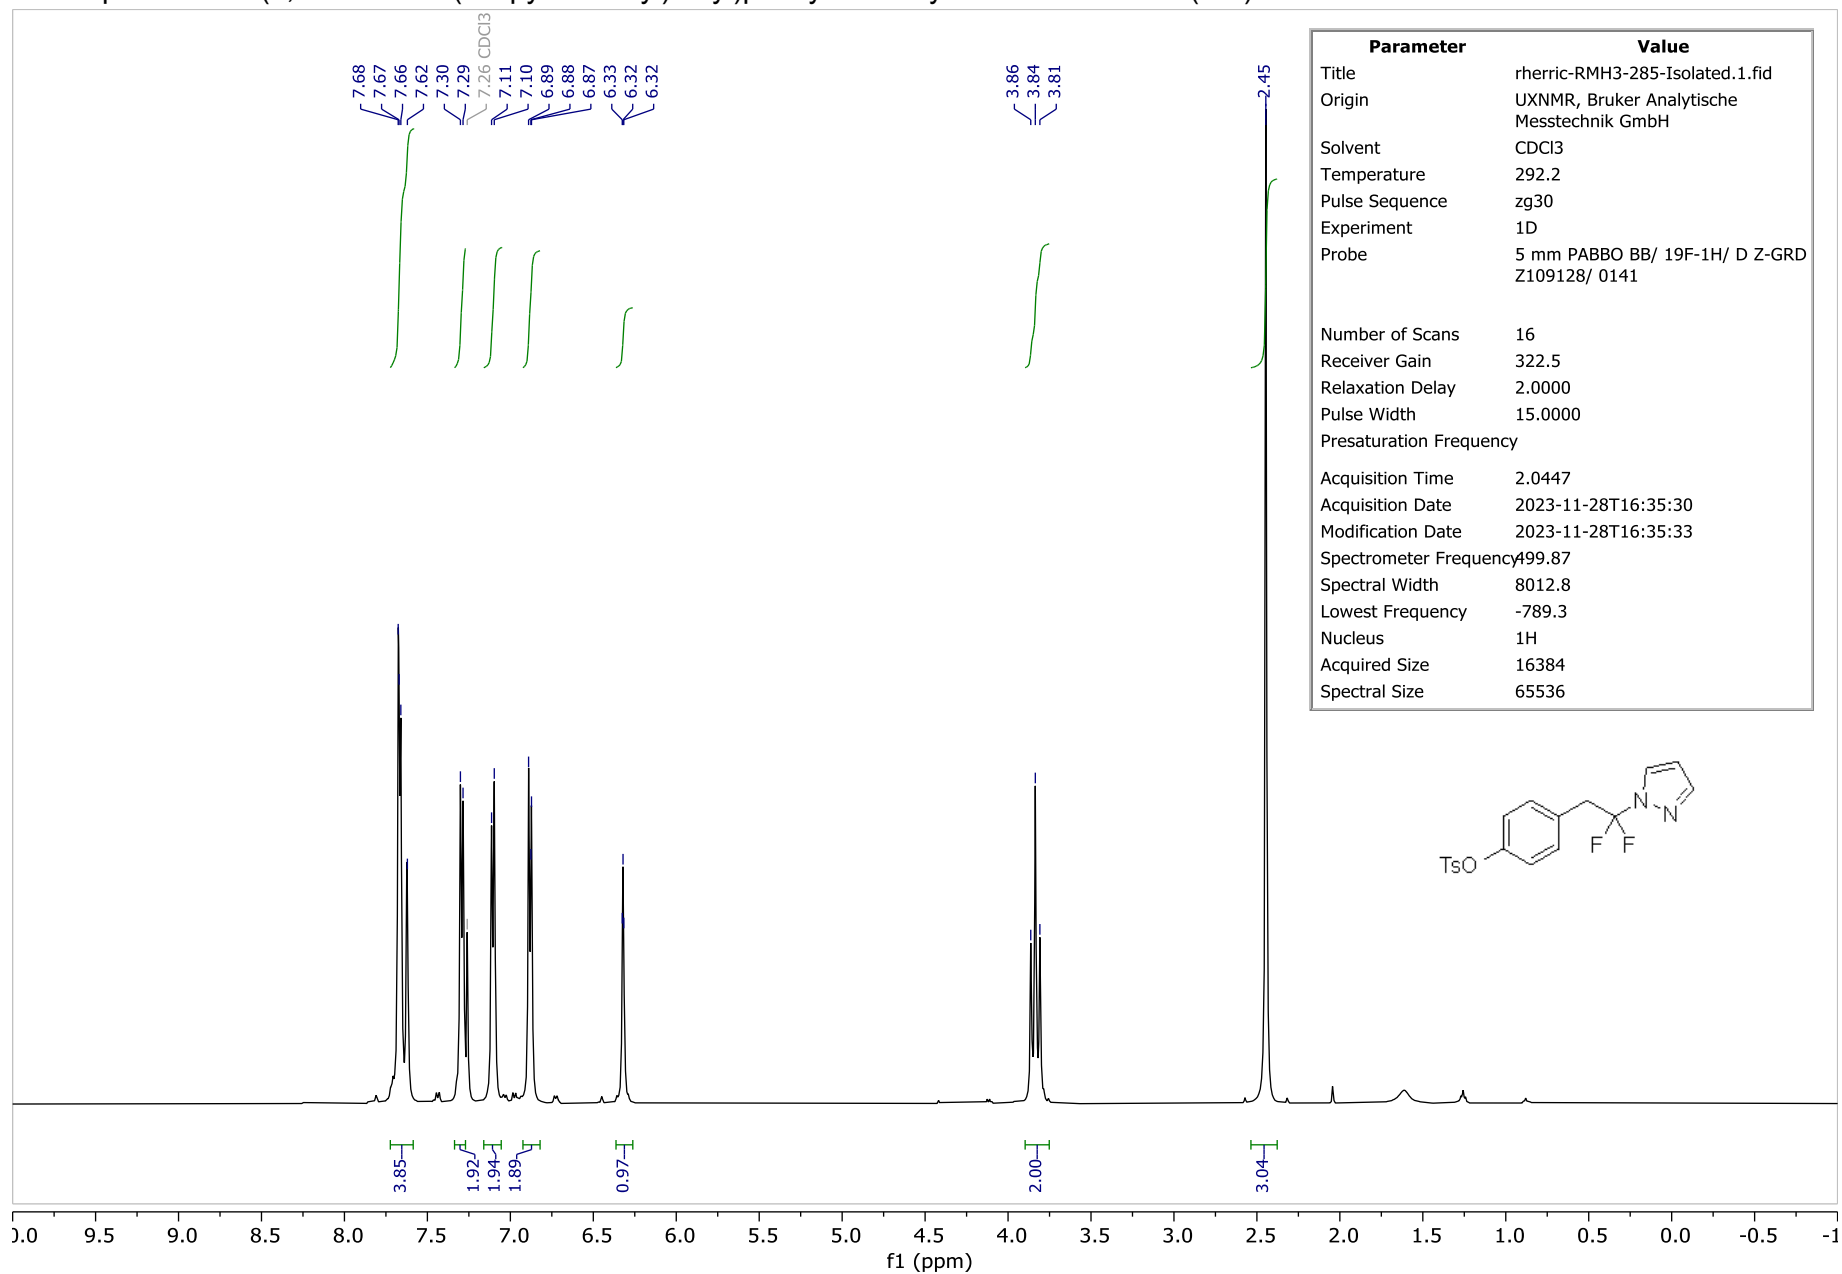

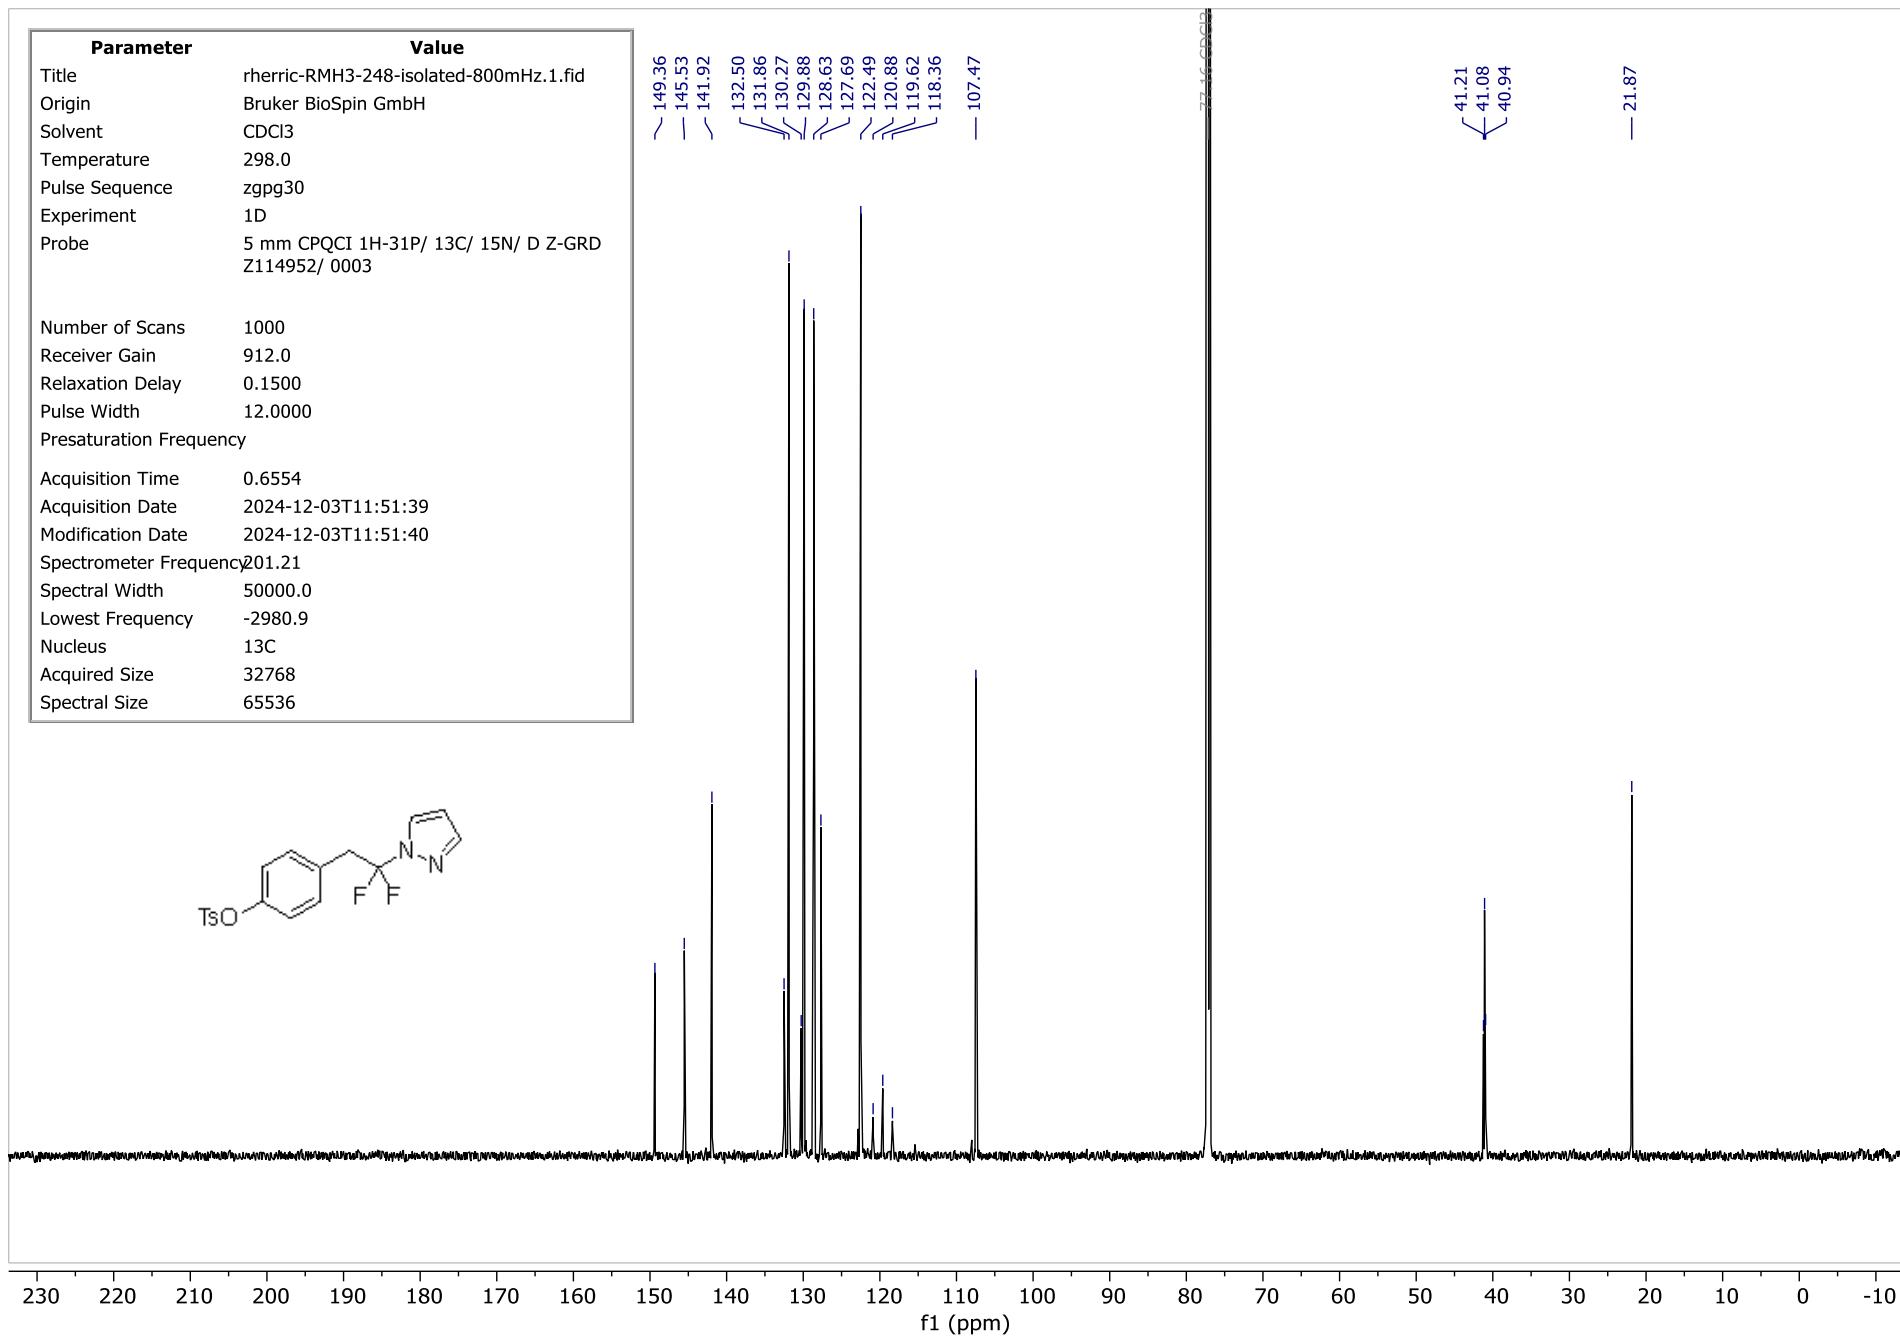



NMR spectra for (*E*)-1-(1,1-difluoro-2-(4-methoxyphenyl)pent-2-en-1-yl)-1*H*-pyrazole (**11s**)

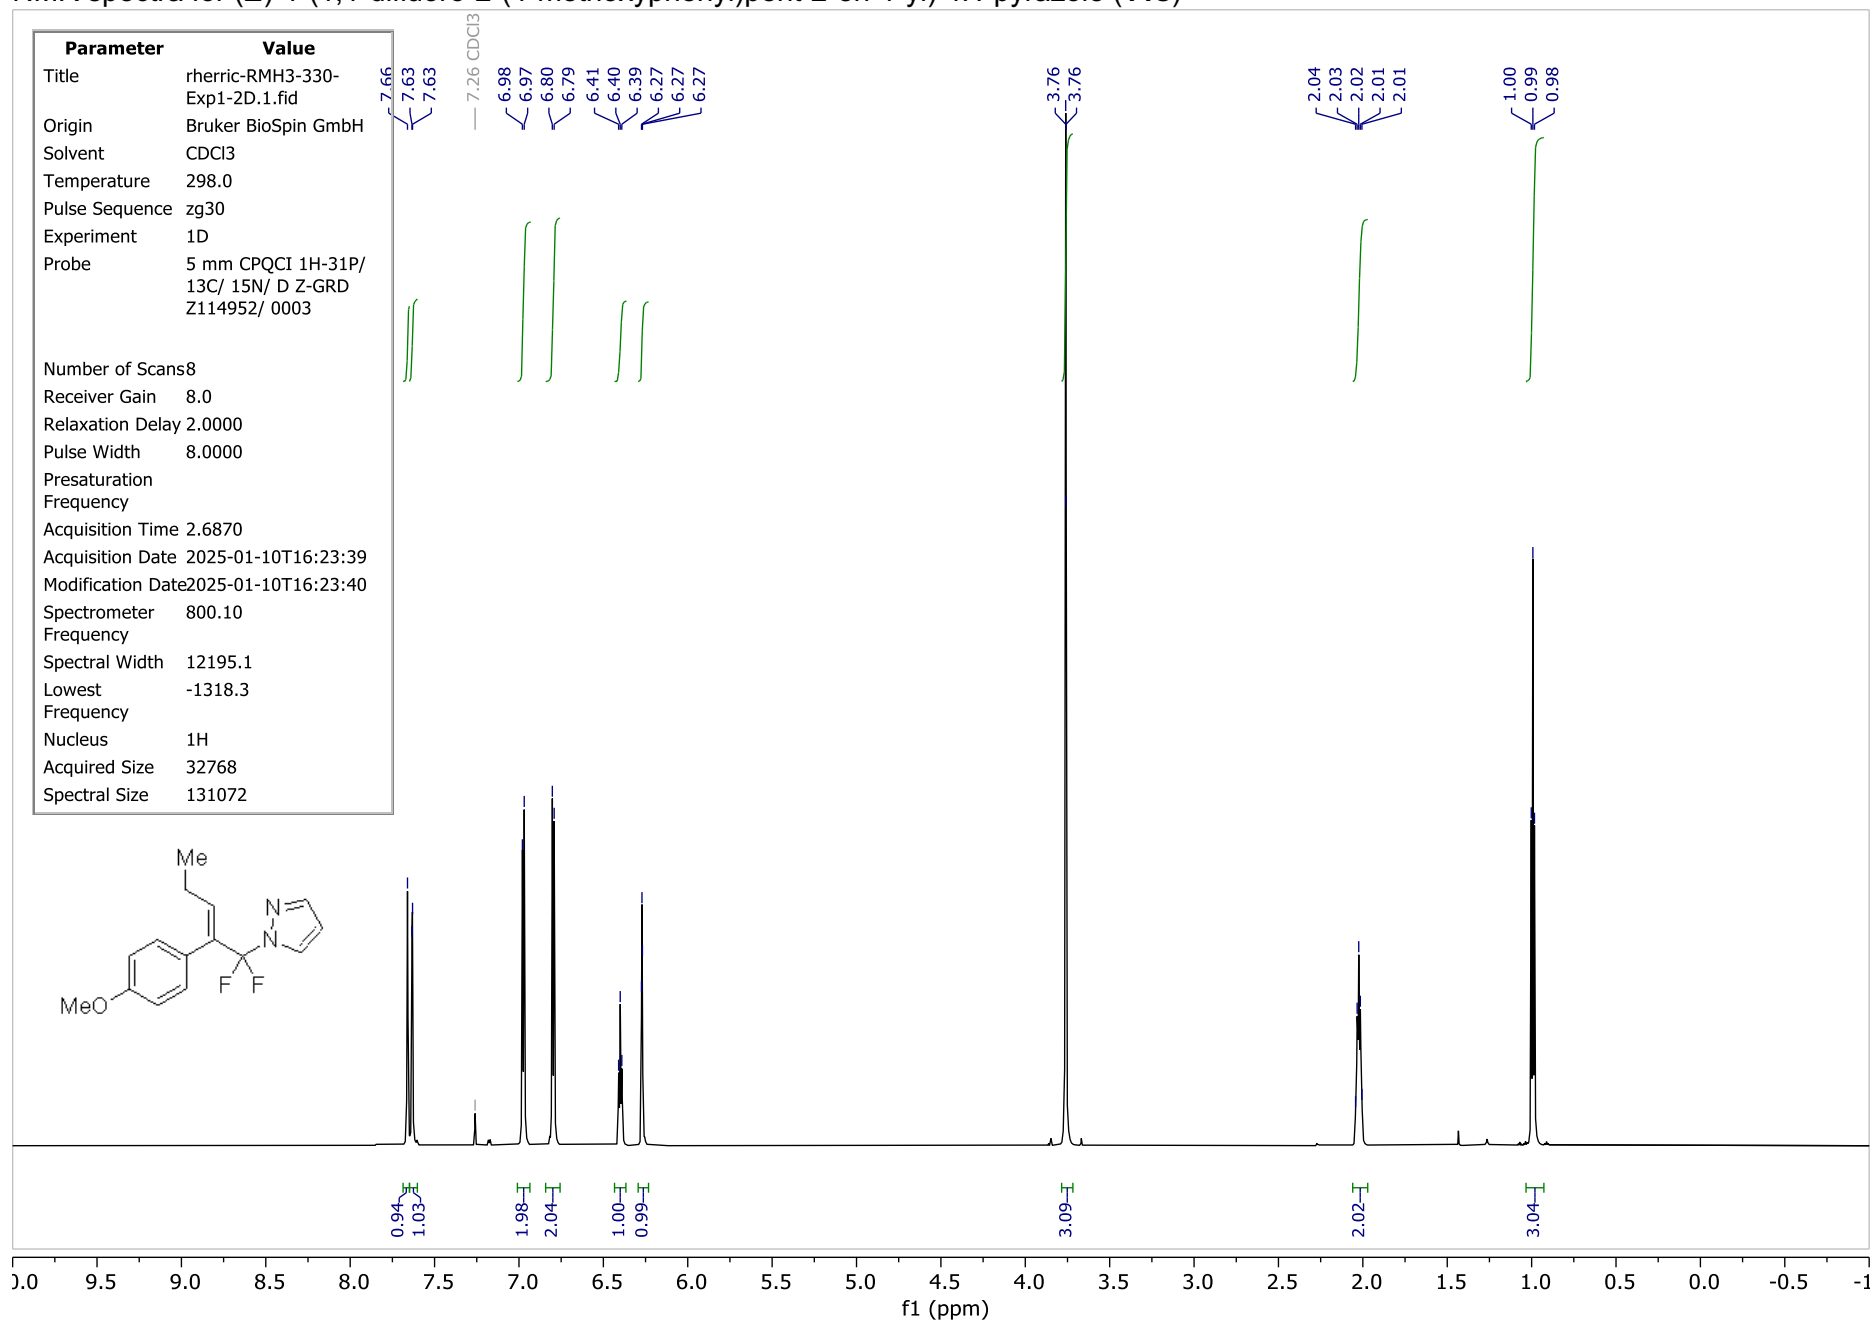



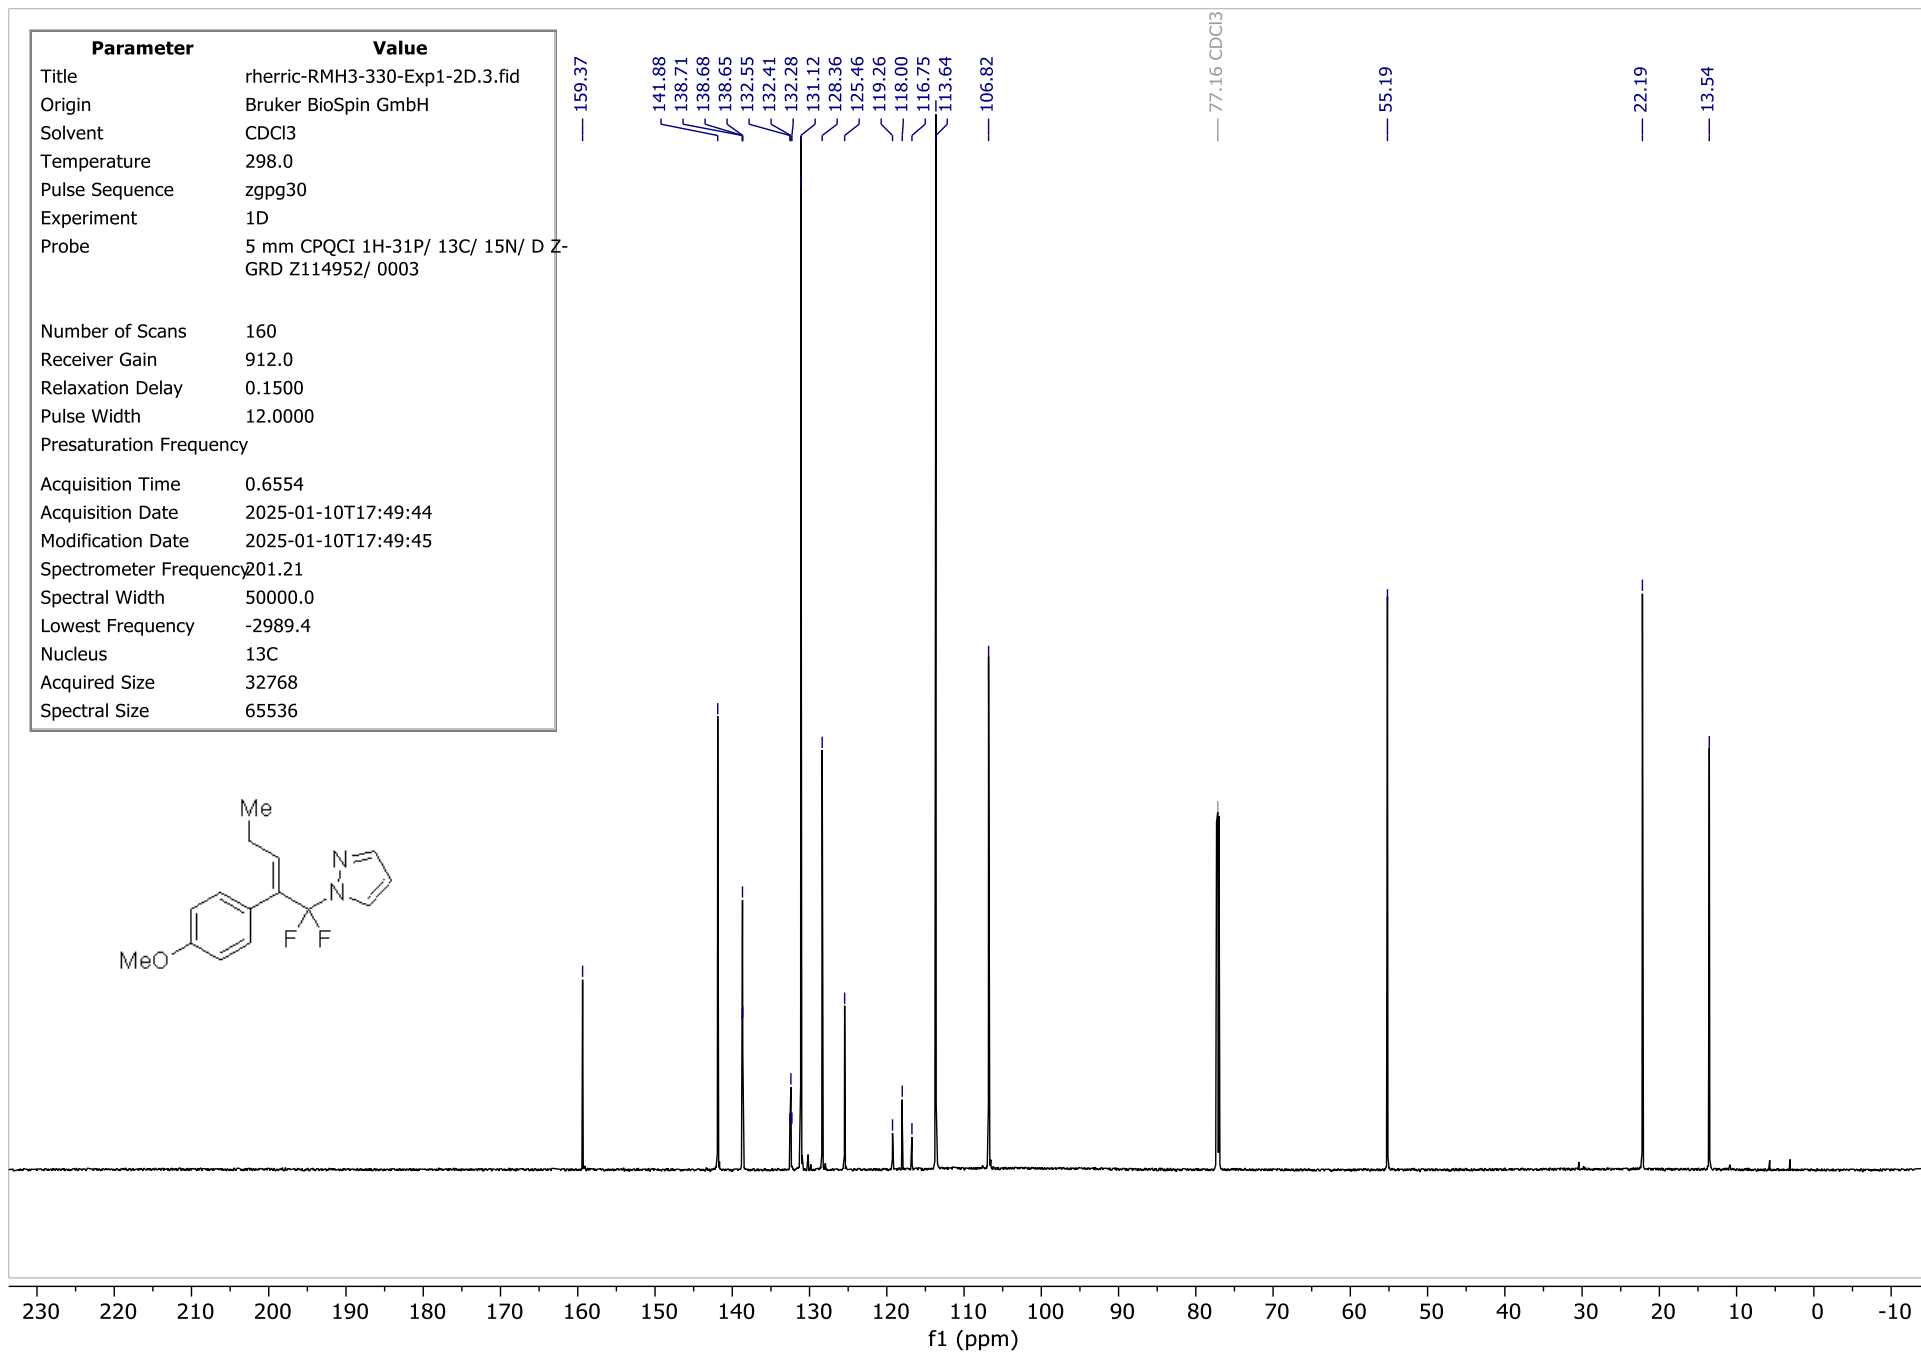

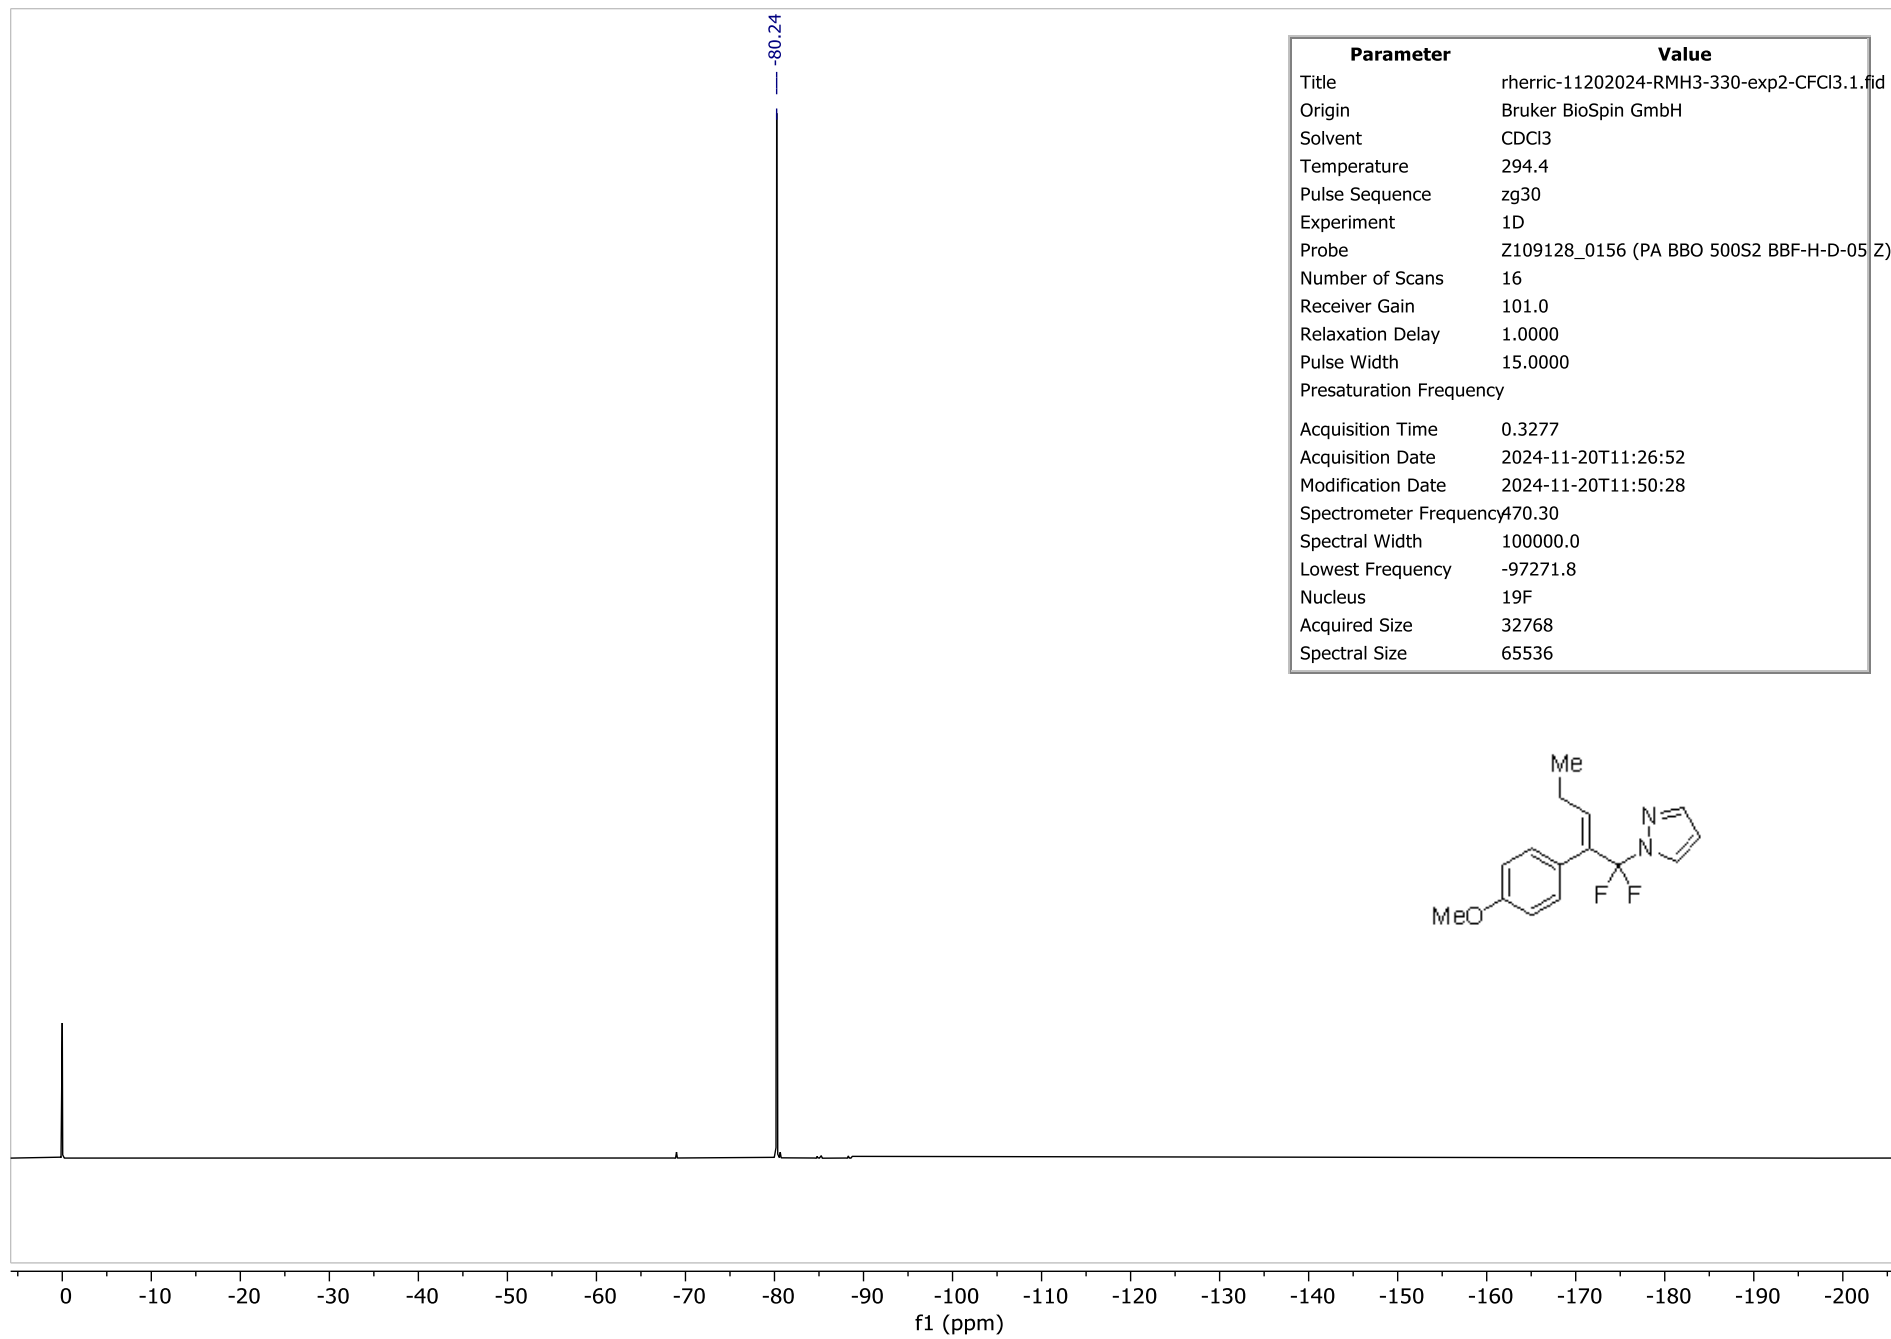

| Parameter               | Value                                      |
|-------------------------|--------------------------------------------|
| Title                   | rherric-11202024-RMH3-330-exp2-CFCI3.1.fid |
| Origin                  | Bruker BioSpin GmbH                        |
| Solvent                 | CDCl3                                      |
| Temperature             | 294.4                                      |
| Pulse Sequence          | zg30                                       |
| Experiment              | 1D                                         |
| Probe                   | Z109128_0156 (PA BBO 500S2 BBF-H-D-05 Z)   |
| Number of Scans         | 16                                         |
| Receiver Gain           | 101.0                                      |
| Relaxation Delay        | 1.0000                                     |
| Pulse Width             | 15.0000                                    |
| Presaturation Frequency |                                            |
| Acquisition Time        | 0.3277                                     |
| Acquisition Date        | 2024-11-20T11:26:52                        |
| Modification Date       | 2024-11-20T11:50:28                        |
| Spectrometer Frequency  | 470.30                                     |
| Spectral Width          | 100000.0                                   |
| Lowest Frequency        | -97271.8                                   |
| Nucleus                 | 19F                                        |
| Acquired Size           | 32768                                      |
| Spectral Size           | 65536                                      |

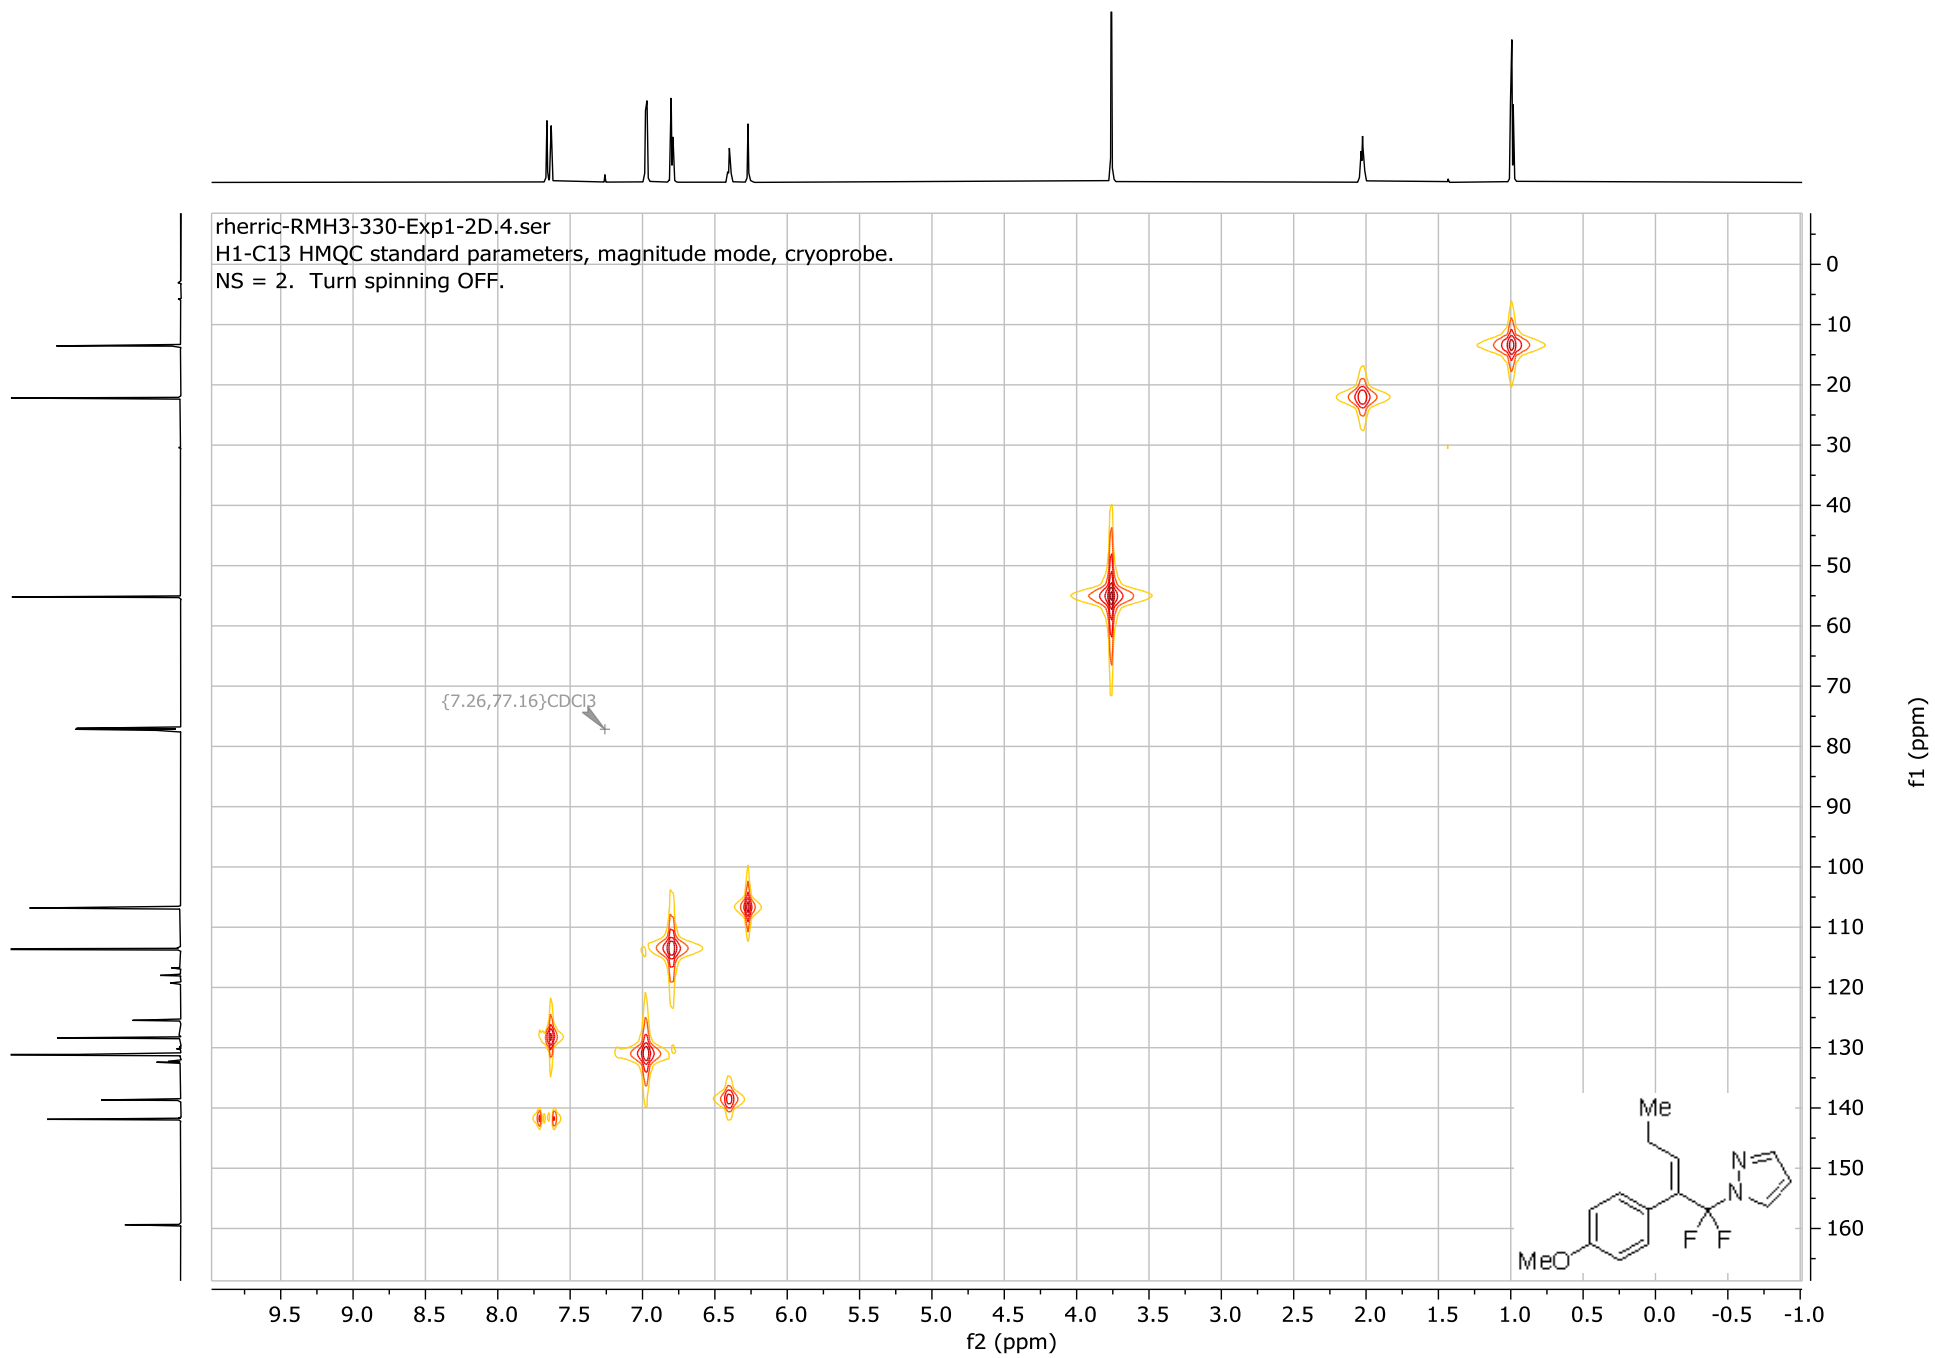

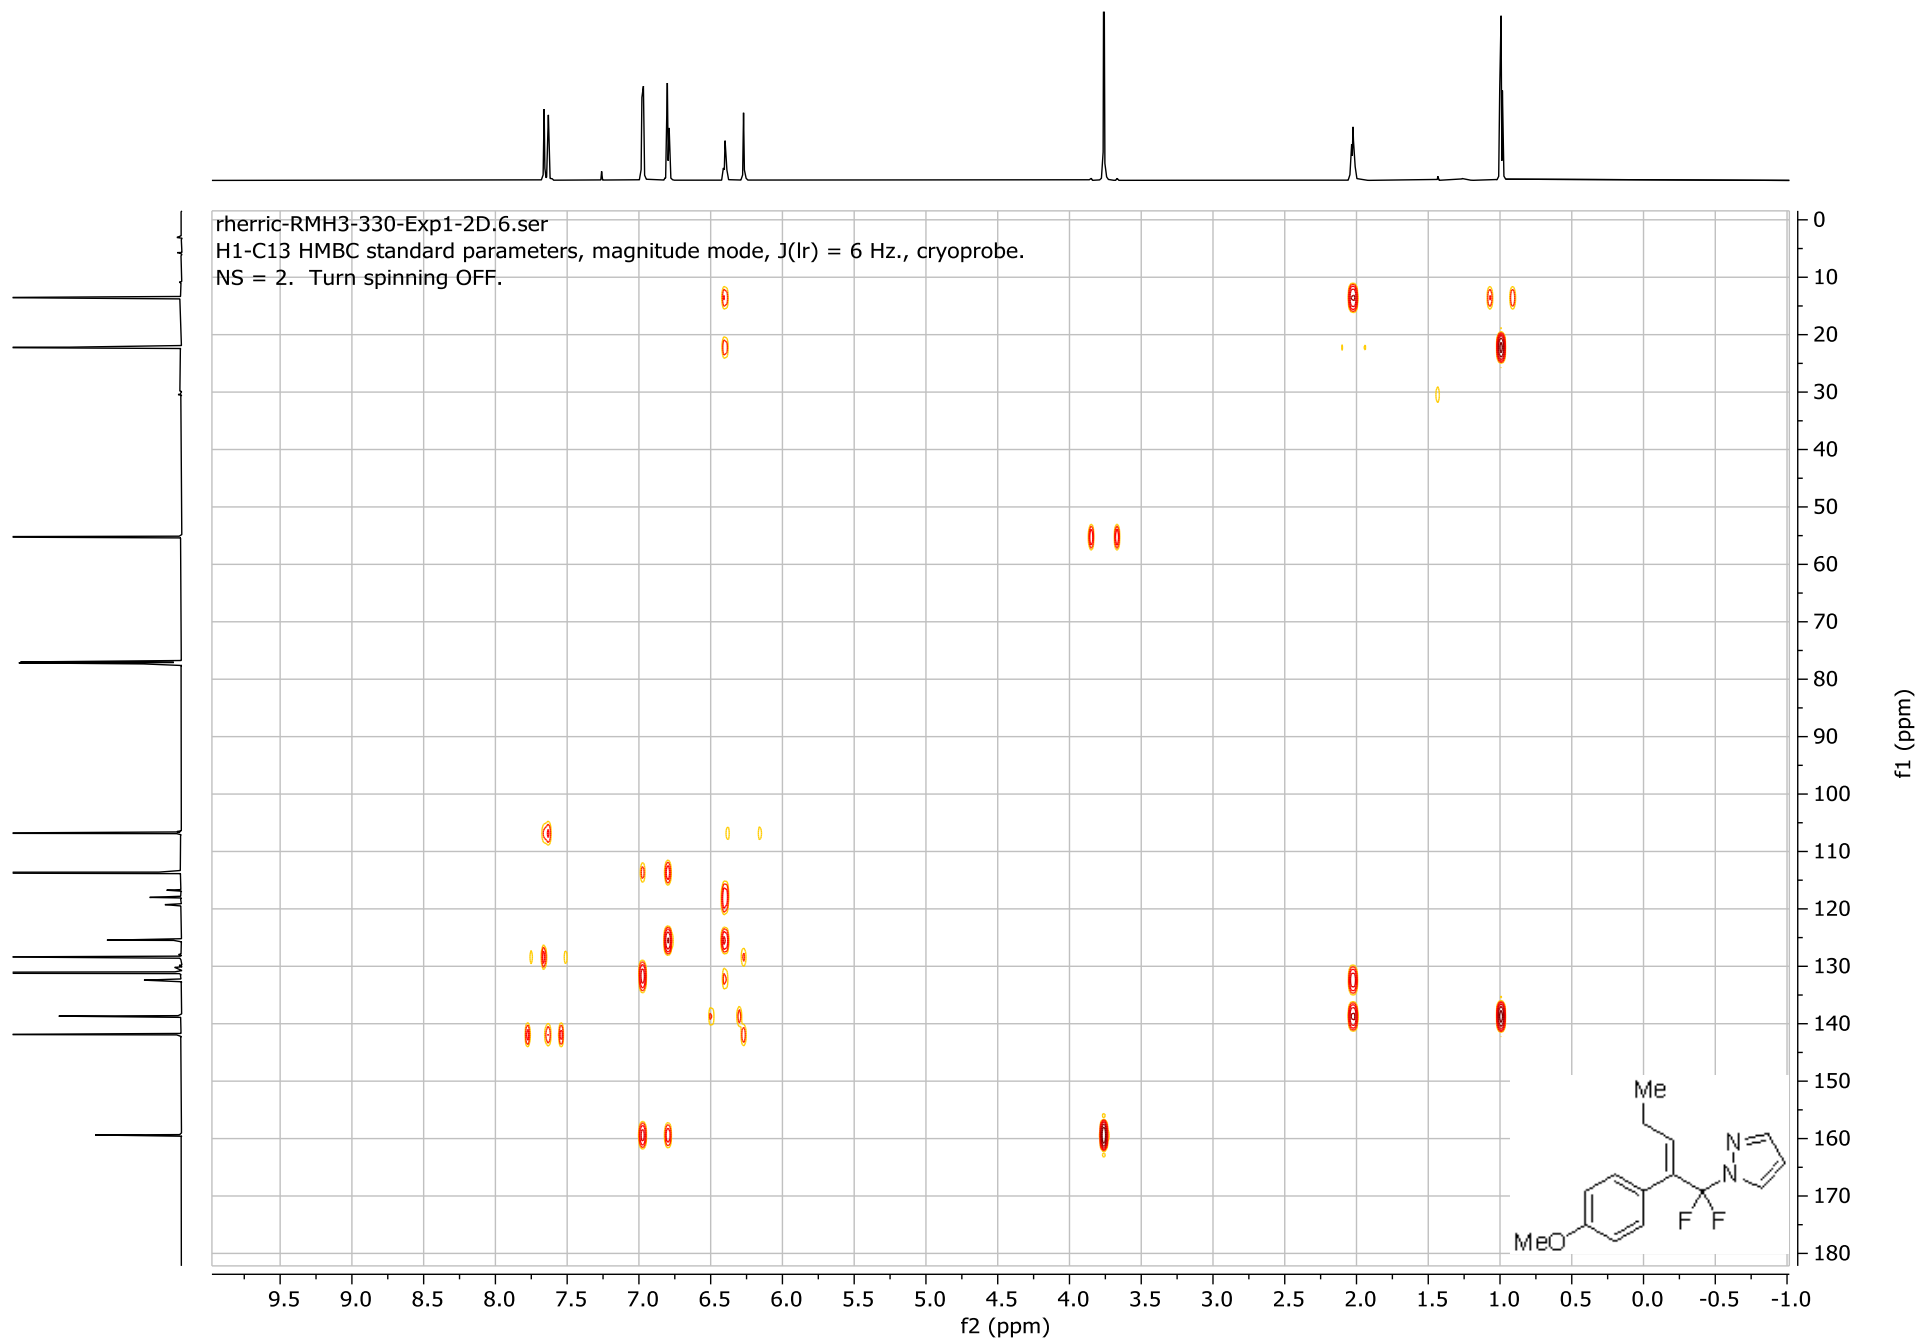

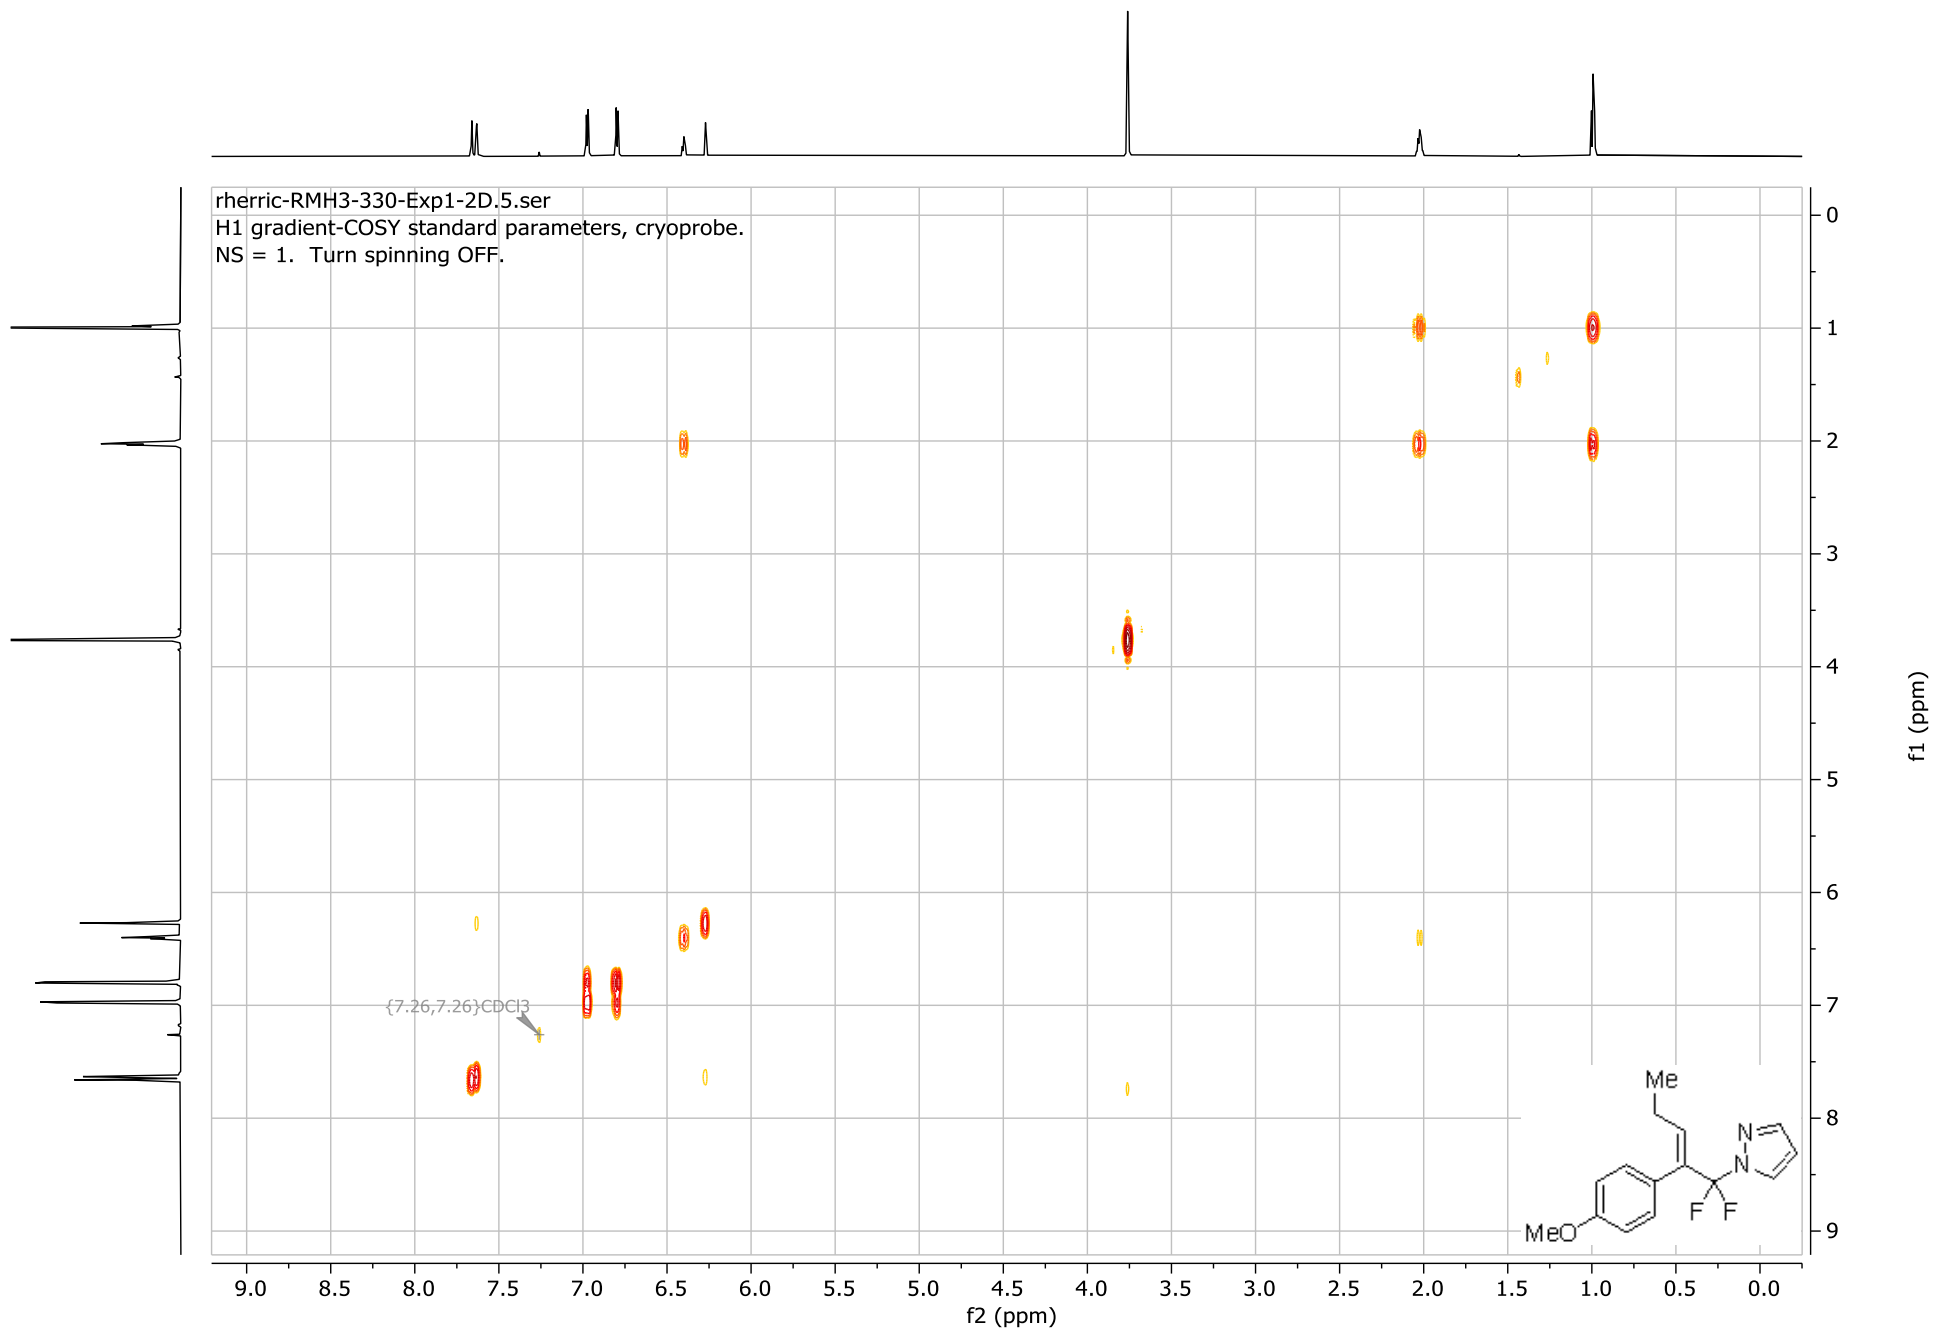

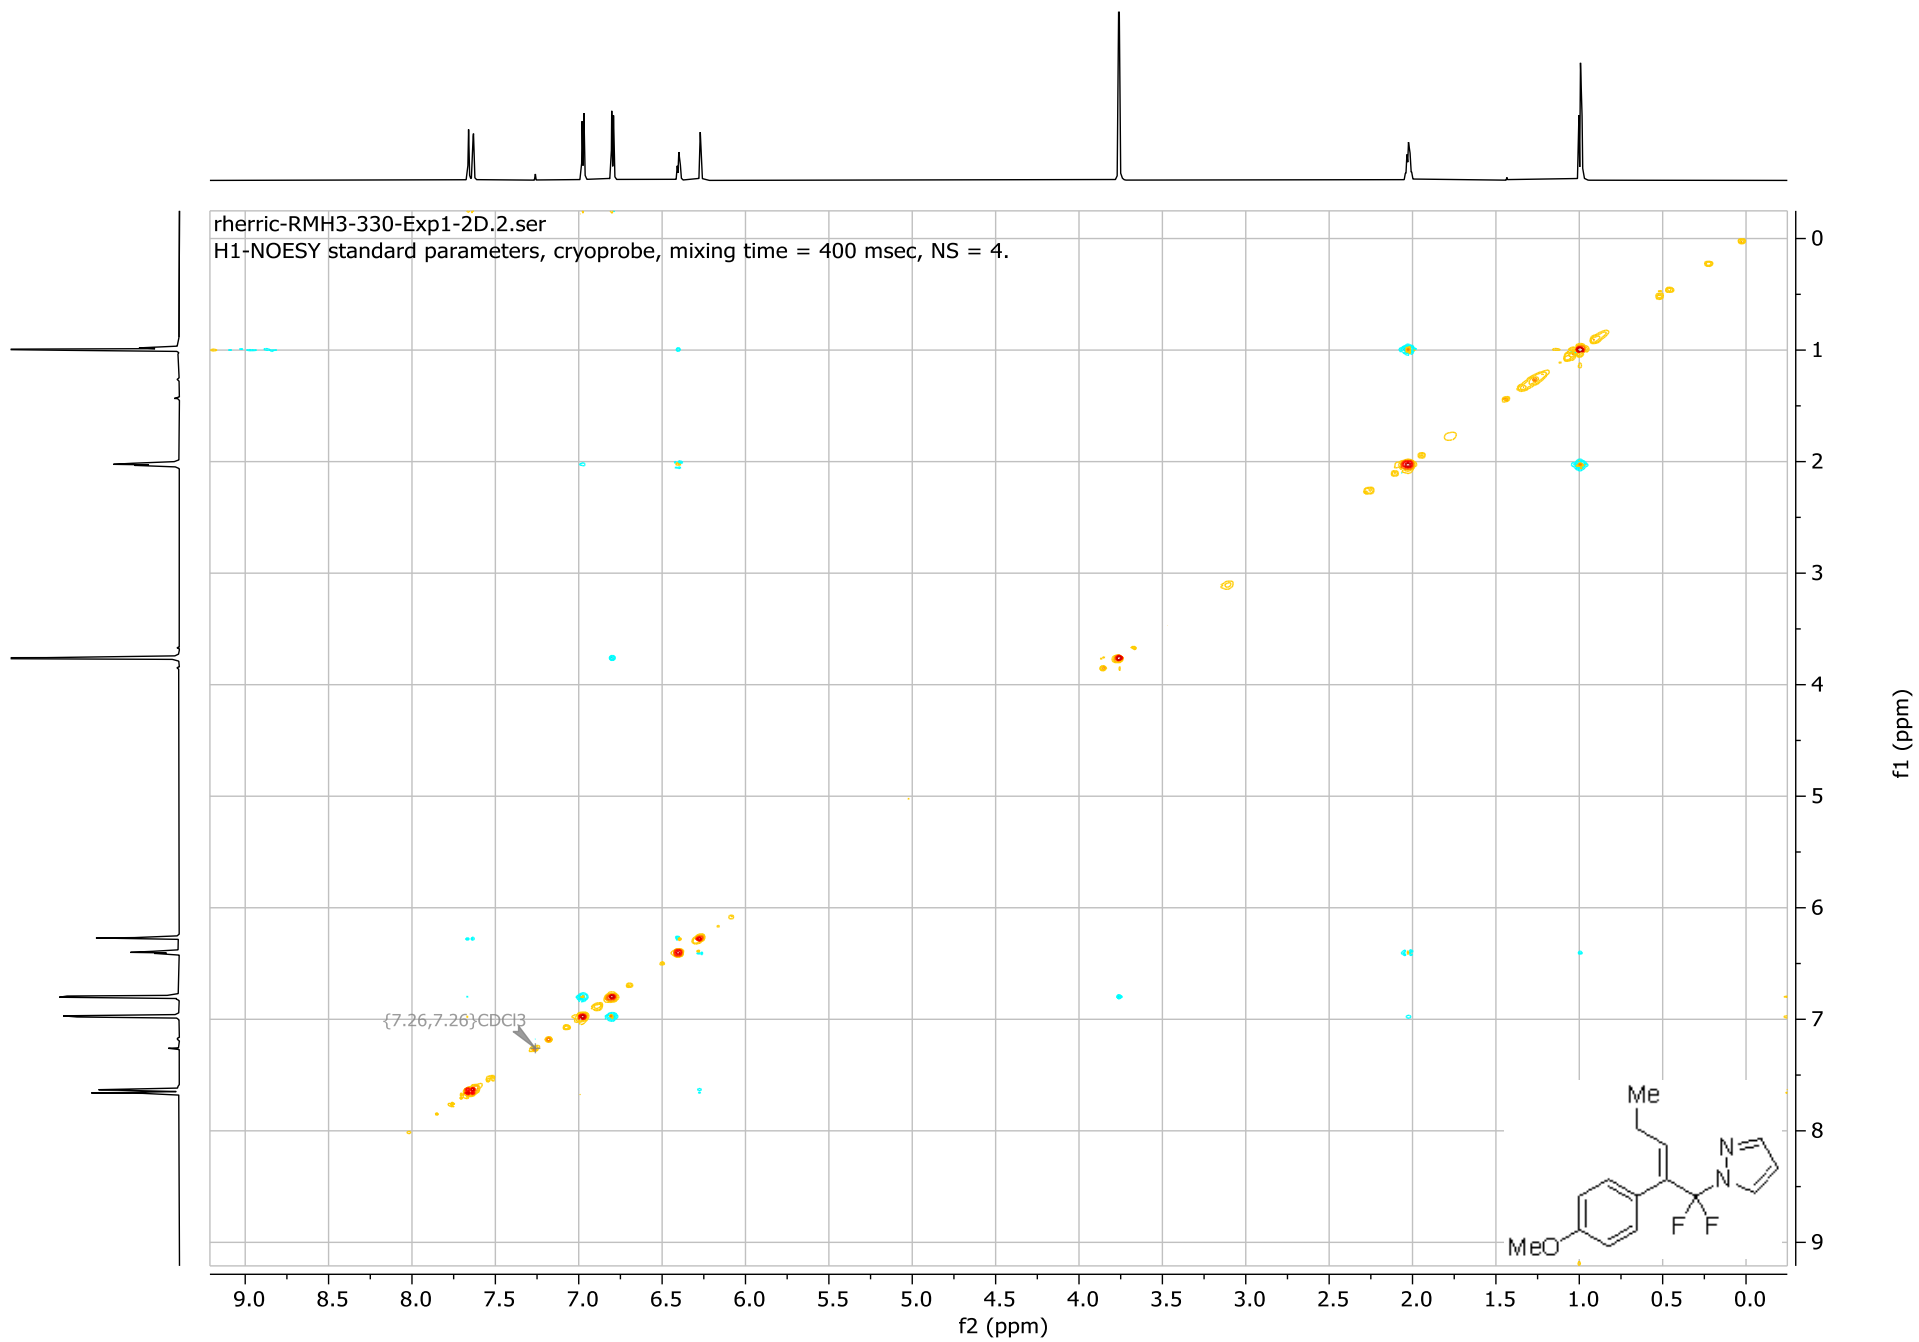

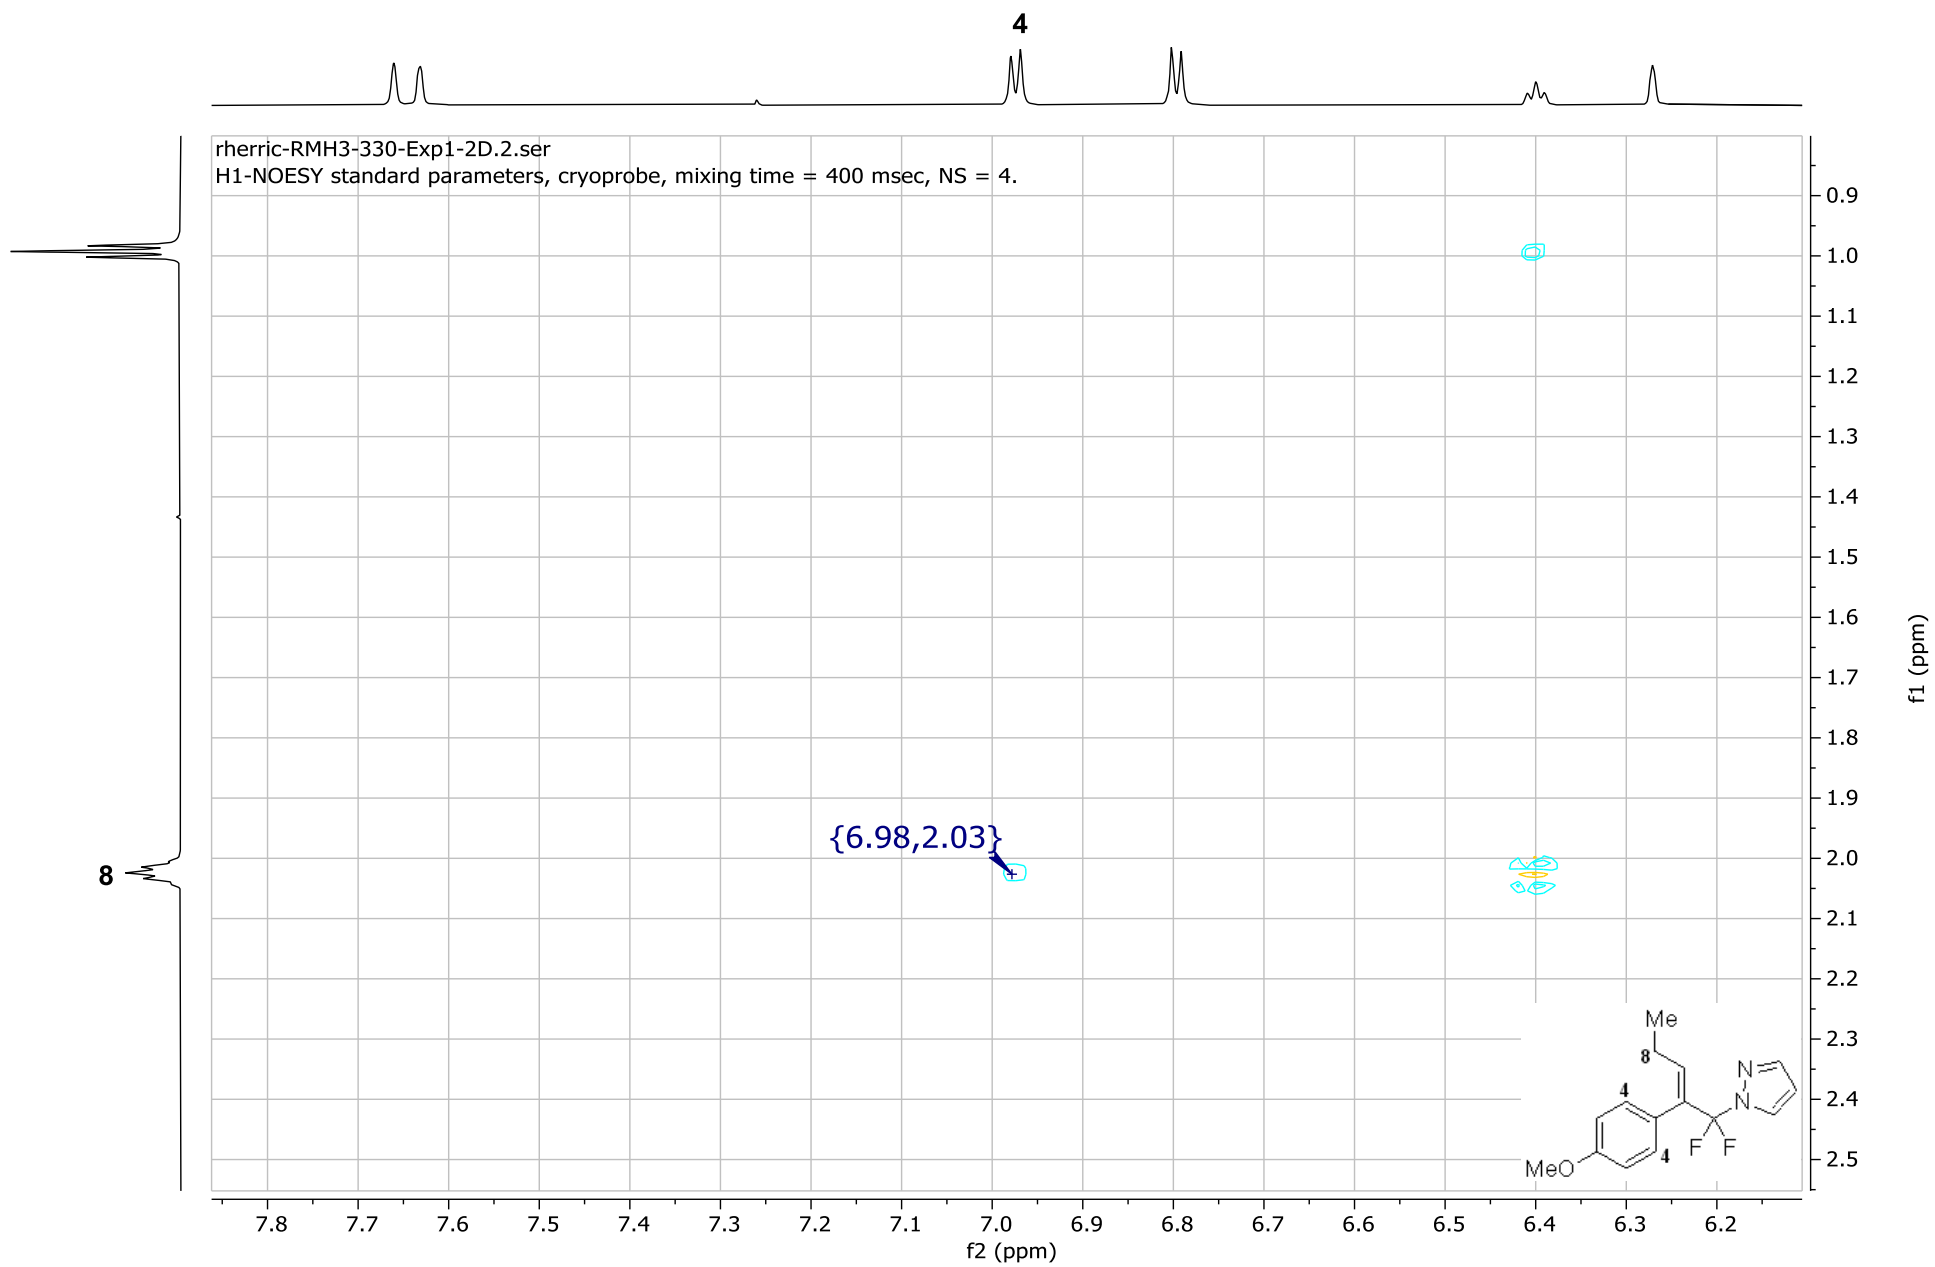

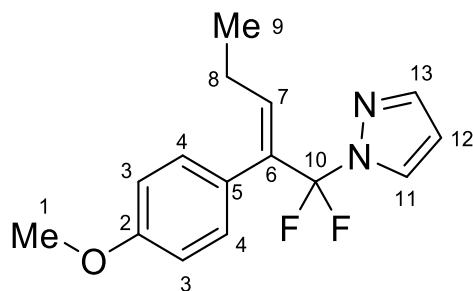

**<sup>1</sup>H (800 MHz) and  
<sup>13</sup>C (201 MHz) Data**

Solvent: CDCl<sub>3</sub>

| Atom | <sup>1</sup> H shift (ppm) | <sup>1</sup> H mult. | <sup>1</sup> H J value (Hz) | <sup>13</sup> C shift (ppm) | <sup>13</sup> C mult. | <sup>13</sup> C J value (Hz) | HMBC           | COSY   | NOESY   |
|------|----------------------------|----------------------|-----------------------------|-----------------------------|-----------------------|------------------------------|----------------|--------|---------|
| 1    | 3.76                       | s                    |                             | 55.2                        | s                     |                              | 2              |        | 3       |
| 2    |                            |                      |                             | 159.4                       | s                     |                              | 1              |        |         |
| 3    | 6.80                       | d                    | 8.7                         | 113.6                       | s                     |                              | 2, 3, 4, 5     | 4      | 1, 4    |
| 4    | 6.97                       | d                    | 8.7                         | 131.1                       | s                     |                              | 2, 3, 4, 7, 8  | 3      | 3, 8    |
| 5    |                            |                      |                             | 125.5                       | s                     |                              | 3, 6           |        |         |
| 6    |                            |                      |                             | 132.4                       | t                     | 26.4                         | 7, 8           |        |         |
| 7    | 6.40                       | t                    | 7.5                         | 138.7                       | t                     | 6.3                          | 5, 6, 8, 9, 10 | 8      | 8, 9    |
| 8    | 2.02                       | p                    | 7.5                         | 22.2                        | s                     |                              | 6, 7, 9        | 7, 9   | 4, 7, 9 |
| 9    | 0.99                       | t                    | 7.6                         | 13.5                        | s                     |                              | 7, 8           | 8      | 7, 8    |
| 10   |                            |                      |                             | 118.0                       | t                     | 252.7                        | 7              |        |         |
| 11   | 7.66                       | s                    |                             | 141.9                       | s                     |                              | 12, 13         | 12     | 12      |
| 12   | 6.27                       | t                    | 2.2                         | 106.8                       | s                     |                              | 11, 13         | 11, 13 | 11, 13  |
| 13   | 7.63                       | d                    | 2.6                         | 128.4                       | s                     |                              | 11, 12         | 12     | 12      |
